# Supplementary material
Source: PubMed Central journal article supplement (PMC11000591)

Supplementary Information for

**Asymmetric Synthesis of Sulfoximines, Sulfonimidoyl Fluorides, and Sulfonimidamides Enabled by an Enantiopure Bifunctional S(VI) Reagent**

Shun Teng<sup>1</sup>, Zachary P. Shultz<sup>2</sup>, Chuan Shan<sup>1</sup>, Lukasz Wojtas,<sup>1</sup> Justin Lopchuk<sup>1,2,3\*</sup>

<sup>1</sup>Department of Chemistry, University of South Florida, Tampa, FL 33620, USA

<sup>2</sup>Drug Discovery Department, H. Lee Moffitt Cancer Center and Research Institute, 12902 Magnolia Drive, Tampa, FL 33612, USA.

<sup>3</sup>Department of Oncologic Sciences, College of Medicine, University of South Florida, Tampa, FL 33612, USA

Correspondence to: [justin.lopchuk@moffitt.org](mailto:justin.lopchuk@moffitt.org)

**This PDF file includes:**

Materials and Methods

Single Crystal X-Ray Crystallography Data

Chiral HPLC Chromatography Data

NMR Spectra

## Table of Contents

|                                                                                                                                                                                |            |
|--------------------------------------------------------------------------------------------------------------------------------------------------------------------------------|------------|
| General Experimental Information .....                                                                                                                                         | S4         |
| Handling of Reagents .....                                                                                                                                                     | S4         |
| <b>I. Synthesis of <i>N,N</i>-(diisopropylcarbamoyl)-2-methylpropane-2-sulfonimidoyl fluoride (<i>t</i>-BuSF).</b> .....                                                       | <b>S5</b>  |
| <b>Ia.</b> Synthesis of <i>N,N</i> -diisopropyl carbamoyl chloride.....                                                                                                        | <b>S5</b>  |
| <b>Ib.</b> Decagram synthesis of enantiopure ( <i>S</i> )- <i>t</i> -BuSF .....                                                                                                | <b>S7</b>  |
| <b>II. Stability study of <i>N</i>-protected sulfonimidoyl fluorides</b> .....                                                                                                 | <b>S11</b> |
| <b>IIa.</b> Bench stability analysis of <i>t</i> -BuSF.....                                                                                                                    | <b>S11</b> |
| <b>IIb.</b> Thermal stability of <i>tert</i> -butyl sulfonimidoyl fluoride reagents .....                                                                                      | <b>S14</b> |
| <b>IIb-1.</b> Thermal stability of <i>t</i> -BuSF .....                                                                                                                        | <b>S14</b> |
| <b>IIb-2.</b> Thermal stability comparison of different protecting groups .....                                                                                                | <b>S16</b> |
| <b>IIc.</b> Stereogenic stability of <i>t</i> -BuSF in the presence of fluoride ions.....                                                                                      | <b>S25</b> |
| <b>III. Sulfonimidoyl transfer: First <i>S</i>-functionalization of <i>t</i>-BuSF</b> .....                                                                                    | <b>S26</b> |
| <b>IIIa.</b> Reaction optimization: sulfonimidoyl transfer with <i>t</i> -BuSF .....                                                                                           | <b>S26</b> |
| <b>IIIb.</b> General procedures for first <i>S</i> -functionalization of <i>t</i> -BuSF .....                                                                                  | <b>S29</b> |
| <b>IIIb-1.</b> General procedure 1 (GP-1): Stepwise additions .....                                                                                                            | <b>S30</b> |
| <b>IIIb-2.</b> General procedure 2 (GP-2): One-pot lithiation/ <i>S</i> (VI) transfer .....                                                                                    | <b>S31</b> |
| <b>IIIb-3.</b> General procedure 3 (GP-3): Lithiation of (hetero)aryl halides and more challenging substrates.....                                                             | <b>S32</b> |
| <b>IV. <i>S</i>-Activation of <i>tert</i>-butyl sulfoximines for further functionalization</b> .....                                                                           | <b>S33</b> |
| <b>IVa.</b> Reaction optimization: Reductive de- <i>tert</i> -butylation of sulfoximines .....                                                                                 | <b>S33</b> |
| <b>IVb.</b> General procedure 4 (GP-4): Reductive de- <i>tert</i> -butylation of sulfoximines to sulfinyl ureas using <i>t</i> -BuOK .....                                     | <b>S34</b> |
| <b>IVc.</b> Reaction optimization: Enantiospecific <i>S</i> -fluorination of sulfinyl ureas to sulfonimidoyl fluorides .....                                                   | <b>S36</b> |
| <b>IVd.</b> General procedure 5 (GP-5): Enantiospecific <i>S</i> -fluorination of sulfinyl ureas to sulfonimidoyl fluorides .....                                              | <b>S37</b> |
| <b>IVe.</b> Reaction optimization: Enantiospecific <i>S</i> -activation of <i>tert</i> -butyl sulfoximines to sulfonimidoyl fluorides .....                                    | <b>S38</b> |
| <b>IVf.</b> General procedure 6 (GP-6): Enantiospecific de- <i>tert</i> -butylation/ <i>S</i> -fluorination of <i>tert</i> -butyl sulfoximines to sulfonimidoyl fluorides..... | <b>S38</b> |
| <b>V. Second <i>S</i>-functionalization: Enantiospecific synthesis of sulfoximines and sulfonimidamides from sulfonimidoyl fluorides</b> .....                                 | <b>S40</b> |
| <b>Va.</b> General procedure 7 (GP-7): Enantiospecific synthesis of sulfoximines from sulfonimidoyl fluorides using Grignard reagents.....                                     | <b>S40</b> |
| <b>Vb.</b> General procedure 8 (GP-8): Enantiospecific synthesis of sulfoximines from sulfonimidoyl fluorides using turbo-Grignard reagents .....                              | <b>S41</b> |
| <b>Vc.</b> General procedure 9 (GP-9): Enantiospecific synthesis of sulfonimidamides from sulfonimidoyl fluorides using Li/Na/KHMDS .....                                      | <b>S42</b> |

|                                                                                                                                                                  |             |
|------------------------------------------------------------------------------------------------------------------------------------------------------------------|-------------|
| <b>Vd.</b> General procedure 10 (GP-10): Enantiospecific synthesis of sulfonimidamides from sulfonimidoyl fluorides using turbo-amides .....                     | <b>S43</b>  |
| <b>Ve.</b> General procedure 11 (GP-11): Enantiospecific synthesis of sulfonimidamides from sulfonimidoyl fluorides under thermal conditions .....               | <b>S44</b>  |
| <b>Vf.</b> General procedure 12 (GP-12): Enantiospecific synthesis of sulfoximines and sulfonimidamides from <i>tert</i> -butyl sulfoximines .....               | <b>S45</b>  |
| <b>VI. Deprotection of <i>N,N</i>-diisopropyl urea protecting group from sulfoximines and sulfonimidamides</b> .....                                             | <b>S47</b>  |
| <b>Vla.</b> Reaction optimization: Deprotection of <i>N,N</i> -diisopropyl sulfonimidoyl ureas to N–H sulfoximines and sulfonimidamides .....                    | <b>S47</b>  |
| <b>Vlb.</b> General procedure 13 (GP-13): Deprotection of <i>N,N</i> -diisopropyl urea from sulfoximines and sulfonimidamide using CSA .....                     | <b>S49</b>  |
| <b>Vlc.</b> General procedure 14 (GP-14): Deprotection of <i>N,N</i> -diisopropyl urea from secondary sulfonimidamide using DMSO/H <sub>2</sub> O and heat ..... | <b>S50</b>  |
| <b>VII. Recrystallization of <i>tert</i>-butyl sulfoximines for further enantioenrichment</b> ..                                                                 | <b>S51</b>  |
| <b>VIIa.</b> General procedure 15 (GP-15): Recrystallization methods .....                                                                                       | <b>S51</b>  |
| <b>VIII. Verification of stereochemical assignment via X-ray crystallography</b> .....                                                                           | <b>S53</b>  |
| <b>IX. Compound characterization data and specific procedures</b> .....                                                                                          | <b>S54</b>  |
| <b>IXa.</b> Sulfonimidoyl transfer scope .....                                                                                                                   | <b>S54</b>  |
| <b>IXb.</b> S-Activation and functionalization .....                                                                                                             | <b>S78</b>  |
| <b>IXc.</b> Asymmetric synthesis of dopamine D1 receptor agonist intermediate .....                                                                              | <b>S110</b> |
| <b>IXd.</b> Asymmetric synthesis of a PYK2 inhibitor intermediate .....                                                                                          | <b>S114</b> |
| <b>IXe.</b> Asymmetric synthesis of celecoxib sulfoximine analog .....                                                                                           | <b>S116</b> |
| <b>IXf.</b> Asymmetric synthesis of isotopically labeled celecoxib <sup>15</sup> NH <sub>2</sub> sulfonimidamide analog .....                                    | <b>S120</b> |
| <b>IXg.</b> Asymmetric synthesis of begacestat sulfonimidamide analog .....                                                                                      | <b>S122</b> |
| <b>X. Single crystal X-ray crystallography data</b> .....                                                                                                        | <b>S125</b> |
| <b>XI. References</b> .....                                                                                                                                      | <b>S153</b> |
| <b>XII. Chiral HPLC chromatograms</b> .....                                                                                                                      | <b>S155</b> |
| <b>XIII. NMR spectra</b> .....                                                                                                                                   | <b>S233</b> |

## General Experimental Information

Reagents were purchased at the highest commercial quality and used without further purification, unless otherwise stated. Anhydrous diethyl ether (Et<sub>2</sub>O), tetrahydrofuran (THF), 2-methyl tetrahydrofuran (2-Me-THF), and toluene (PhMe) were obtained by passing the previously degassed solvent through an activated alumina column (PPT Glass Contour Solvent Purification System). Anhydrous cyclopentyl methyl ether (CPME), dimethoxyethane (DME) and methyl *tert*-butyl ether (MTBE) were purchased from Acros Organics. All glassware was flame-dried under vacuum before use. Yields refer to chromatographically and spectroscopically (<sup>1</sup>H NMR) homogeneous material, unless otherwise stated. Reactions were monitored by LC–MS or thin layer chromatography (TLC) carried out on 250 μm SiliCycle SiliaPlates (TLC Glass–Backed TLC Extra Hard Layer, 60 Å), using shortwave UV light as the visualizing agent and *p*-anisaldehyde, phosphomolybdic acid (PMA) or KMnO<sub>4</sub> with heat as developing agents. Flash column chromatography was performed with a Biotage Isolera One (ZIP or SNAP Ultra cartridges) or with traditional glass flash columns using SiliCycle SiliaFlash® P60 (particle size 40 – 63 μm). NMR spectra were recorded on a Bruker Ascend™ 500 MHz instrument or Bruker Neo600 600 MHz spectrometer and were calibrated using residual undeuterated solvent as an internal reference (CDCl<sub>3</sub>: 7.26 ppm <sup>1</sup>H NMR, 77.16 ppm <sup>13</sup>C NMR; DMSO-*d*<sub>6</sub>: 2.50 ppm <sup>1</sup>H NMR, 39.5 ppm <sup>13</sup>C NMR). The following abbreviations were used to explain NMR peak multiplicities: s = singlet, d = doublet, t = triplet, q = quartet, dd = doublet of doublet, ddd = doublet of doublet of doublet, dddd = doublet of doublet of doublet of doublet, ddddd = doublet of doublet of doublet of doublet of doublet, tt = triplet of triplet, ddt = doublet of doublet of triplet, m = multiplet, br = broad, hept = heptet. High resolution mass spectra (HRMS) were recorded on an Agilent 6230 LC–MS TOF mass spectrometer. Enantiomeric excess (ee) was determined using a Varian Prostar HPLC with a 210 binary pump and a 335 diode array detector. Optical rotations were measured using a JASCO P-2000 polarimeter with a cell length of 1 dm. Melting points were recorded on a Chemglass DMP 100 melting point apparatus and were uncorrected.

## Handling of Reagents

All synthesized sulfonimidoyl fluorides, sulfoximines, and sulfonimidamides were stored under ambient conditions, either room temperature or at -20 °C and appeared to be unchanged over the course of this work. All reactions were performed using dry solvents unless otherwise stated. No significant difference in reactivity and stereospecificity was observed for sulfonimidoyl fluorides used within this study. Stability analysis of the sulfonimidoyl transfer reagent ***t*-BuSF**, including bench and thermal stability, show the reagent is stable for *at least* 7-months under ambient conditions.

## I. Synthesis of *N,N*-(diisopropylcarbamoyl)-2-methylpropane-2-sulfonimidoyl fluoride (*t*-BuSF).

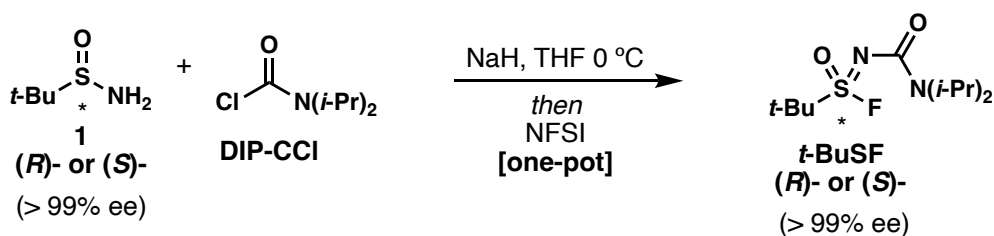

**Scheme S1:** General synthesis for both enantiomers of *tert*-butyl sulfonimidoyl fluoride from commercially available chiral sources.

### Ia. Synthesis of diisopropyl carbamoyl chloride (DIP-CCl).

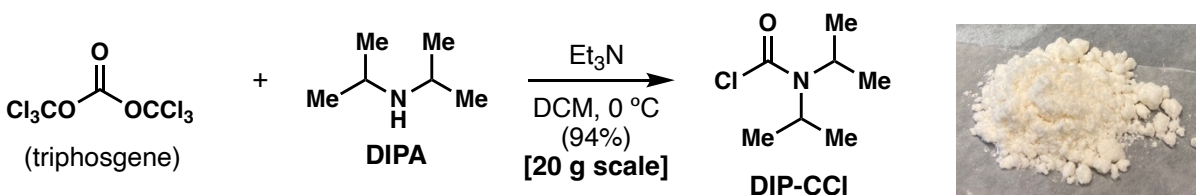

**Scheme S2:** Large-scale preparation of diisopropyl carbamoyl chloride (DIP-CCl).

In a 1 L round-bottom flask equipped with a stir bar, septum capped addition funnel (500 mL) and argon balloon was added triphosgene (20 g, 16.9 mmol, 1 eq.) followed by DCM (100 mL) then cooled to 0 °C. A solution of DIPA (20.5 g, 28.6 mL, 202 mmol, 3 eq.) and Et<sub>3</sub>N (20.5 g, 28.2 mL, 202 mmol, 3 eq.) in DCM (240 mL) was added to the addition funnel (directly poured using a funnel and recapped) then added over 10 minutes. The reaction mixture stirred at 0 °C for 1.5 hours, removed from the ice bath, filtered through a sintered glass funnel (removal of Et<sub>3</sub>N-HCl) and rinsed with DCM (50 mL x 3). The filtrate was concentrated under reduced pressure to remove DCM (rotary evaporator bath set to 25 °C) then taken up in hexanes (450 mL), washed with water (3 x 200 mL). The organic layer was dried over Na<sub>2</sub>SO<sub>4</sub>, filtered and concentrated (rotary evaporator bath set to 25 °C) to give the desired carbamoyl chloride (31.1 g, 190 mmol, 94% yield) as an off-white solid that was sufficiently pure by NMR and used in the next step without further purification.

#### Notes:

- DCM, DIPA and Et<sub>3</sub>N were directly obtained from an anhydrous solvent system (PPT Glass Contour Solvent Purification System) under an atmosphere of argon.
- Triphosgene was purchased from Oakwood Chemicals and directly used.
- Thorough continuous mixing is required to obtain high overall conversion and yield.
- Slower additions of DIPA and Et<sub>3</sub>N in DCM produced reaction mixtures and products having a yellow color. The source of the yellow discoloring was not identified.

- Switching work-up organic solvent from DCM to hexanes provides a whiter solid in high purity, however, DCM can be used and the crude solid recrystallized from hexanes to afford DIP-CCI in high purity and yields (>95% purity; 85-90% yields).
- An alternative method using  $\text{NaHCO}_3$  (reported to give 87% yield of DIP-CCI)<sup>1</sup> as the base resulted in a diminished yield of 20% in our hands.

**Physical characteristics:** Off-white solid

**$^1\text{H}$  NMR:** (500 MHz,  $\text{CDCl}_3$ )  $\delta$  4.53 (q,  $J$  = 6.9 Hz, 1H), 3.66 – 3.50 (m, 1H), 1.36 (d,  $J$  = 6.9 Hz, 6H), 1.21 (d,  $J$  = 6.9 Hz, 6H) ppm.

**$^{13}\text{C}$  NMR:** (126 MHz,  $\text{CDCl}_3$ )  $\delta$  146.0, 52.9, 48.6, 20.4, 19.9. ppm

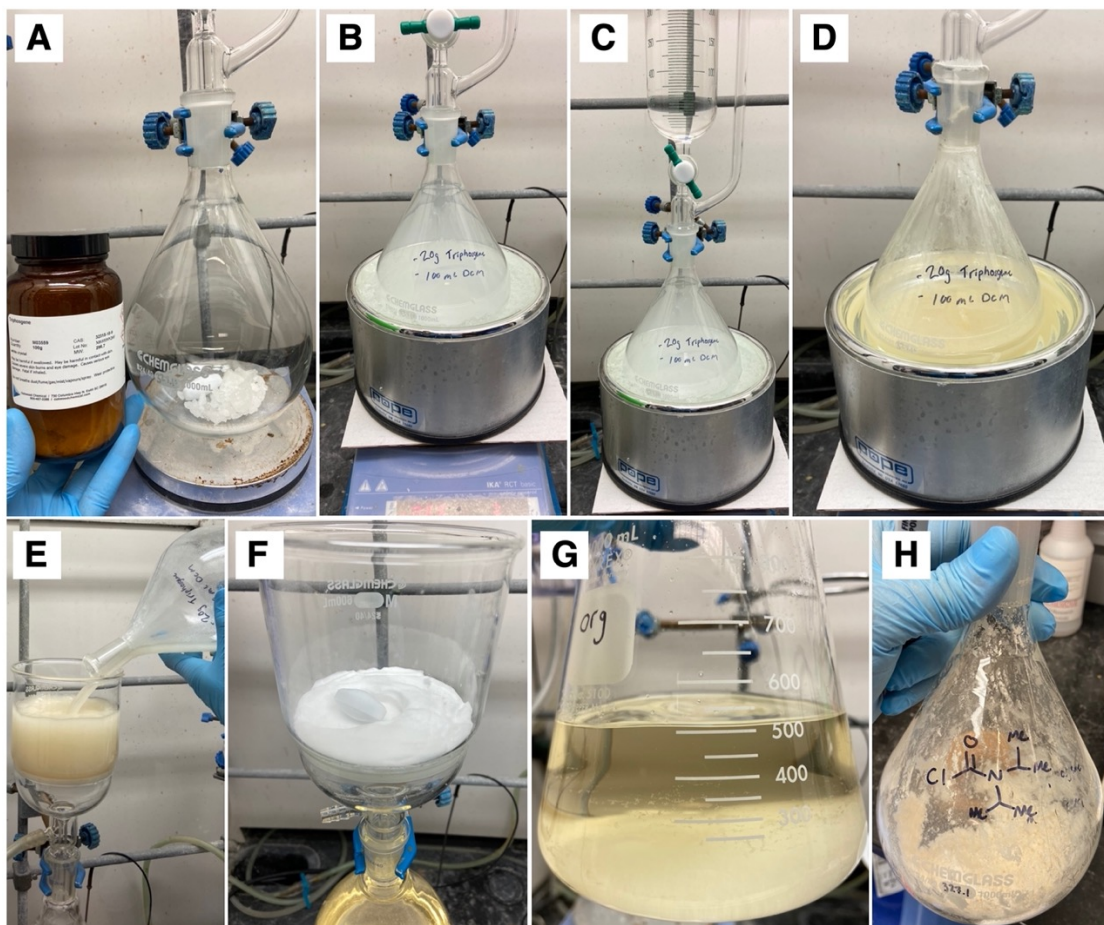

**Graphical Procedure 1:** A 20 gram-scale synthesis of **DIP-CCI**. **A.** Addition of triphosgene to the reaction flask. **B.** Triphosgene dissolved in DCM (100 mL) at 0 °C. **C.** Addition of DIPA/ $\text{Et}_3\text{N}$  solution in DCM (240 mL) to the reaction mixture via addition funnel. **D.** Reaction mixture after stirring for 1.5 hours. **E.** Filtration of the reaction mixture through a sintered glass funnel. **F.** Solid ( $\text{Et}_3\text{N-HCl}$ ) collected and removed by filtration prior to work-up. **G.** Crude organic layer after work-up. **H.** Solid DIP-CCI obtained after removal of solvent from work-up.

## Ib. Decagram synthesis of enantiopure (S)-*t*-BuSF.

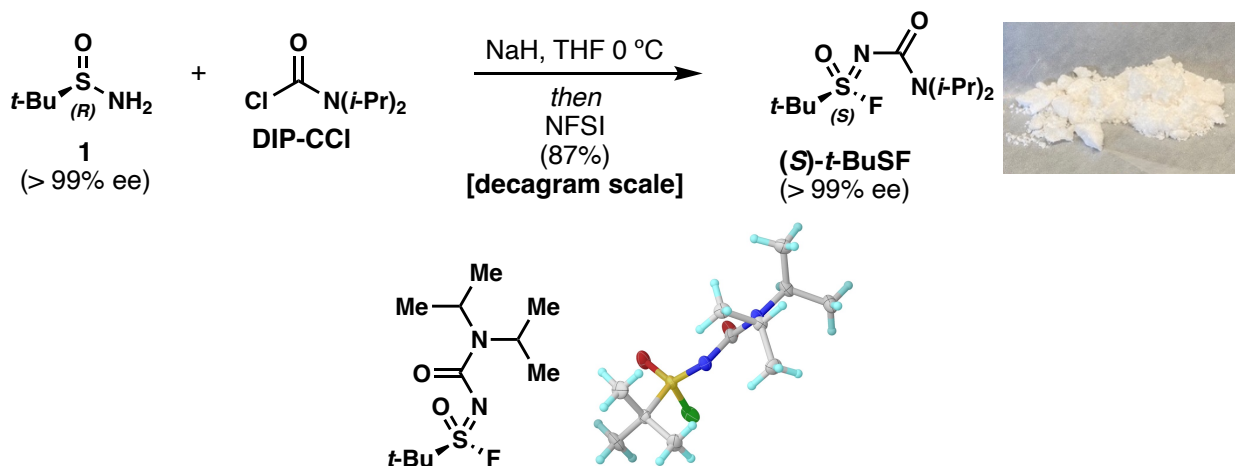

**Scheme S3:** Synthesis of enantiopure *tert*-butyl sulfonimidoyl fluoride (*t*-BuSF) on a decagram scale displaying the bench stable crystalline solid and single crystal X-ray structure.

In a septum capped 1 L round-bottom flask equipped with a stir bar and argon balloon was added (*R*)-*t*-Bu sulfinamide **1** (10.3 g, 41.4 mmol, 1 eq.) followed by THF (400 mL, 0.21 M) then cooled to 0 °C. NaH (8.50 g, 212 mmol, 2.5 eq., 60% wt) was added portion-wise (3 portions) then stirred for 20 minutes until H<sub>2</sub> gas evolution ceased. **DIPC-CCl** (13.9 g, 84.9 mmol, 1 eq.) was added portion-wise (3 portions) then stirred at 0 °C for 1.5 hours until H<sub>2</sub> gas evolution ceased (reaction monitored by TLC and LC–MS for the disappearance of sulfinamide). NFSI (28.1 g, 89.2 mmol, 1.05 eq.) was added in one portion then stirred at 0 °C for an additional 1 hour (reaction monitored by TLC and LC–MS for the disappearance of sulfinyl urea intermediate). The reaction mixture was removed from the ice bath and diluted with 10% EtOAc in hexanes (300 mL) then filtered through a medium porous sintered glass funnel while rinsing with 10% EtOAc in hexanes. The organic solution was washed with 10% KI aqueous solution (150 mL x 3: for removal of unreacted NFSI) and brine (150 mL x 3). The solvent was dried over anhydrous Na<sub>2</sub>SO<sub>4</sub>, filtered and solvents removed under reduced pressure to give a yellow oil. Further purification by silica gel column chromatography using hexanes/EtOAc (0% to 20% EtOAc) provided **(S)-*t*-BuSF** (19.8 g, 74.3 mmol, 87% yield) as a clear colorless oil that solidified to a white crystalline solid under reduced pressure.

**Physical characteristics:** White crystalline solid

**TLC:** R<sub>f</sub> = 0.33 (hexane/EtOAc, 20% EtOAc, PMA).

**<sup>1</sup>H NMR:** (500 MHz, CDCl<sub>3</sub>) δ 4.03 (s, 1H), 3.88 (s, 1H), 1.59 (d, *J* = 0.7 Hz, 9H), 1.38 – 1.10 (m, 12H) ppm.

**<sup>13</sup>C NMR:** (126 MHz, CDCl<sub>3</sub>) δ 153.9, 62.8 (d, *J* = 11.7 Hz), 47.8, 45.9, 24.7, 21.4, 20.7, 20.6 ppm.

**<sup>19</sup>F NMR:** (471 MHz, CDCl<sub>3</sub>) δ 33.20 ppm.

**Specific rotation:**  $[\alpha]_D^{23} = +78.17$  (c 1.00, CHCl<sub>3</sub>)

**HRMS:** Calc'd for C<sub>11</sub>H<sub>23</sub>FN<sub>2</sub>NaO<sub>2</sub>S [M+Na<sup>+</sup>] 289.1356; found 289.1363.

**Enantiomeric excess:** >99%

**HPLC Conditions:** Daicel Chiralpak IC column, 70:30 *n*-hexane:*i*-PrOH, flow rate: 1 mL min<sup>-1</sup>, 25 °C, UV detection wavelength: 220 nm, retention time: minor: 13.0 min, major: 16.7 min.

**CCDC deposition Number:** 2243804

**Notes:**

1. When performing the reaction at this scale (10 g of *t*-Bu sulfinamide), the reaction concentration was increased from 0.1 to 0.2 M. Upon addition of the NFSI, the reaction mixture becomes a thick slurry that is difficult to stir with a traditional stir bar.
2. When performing the reaction on smaller scales (5 g of *t*-Bu sulfinamide), the reaction concentration was 0.1 M and yields of 90-94% (~10 g of *t*-BuSF) have been reproducibly obtained.
3. The sulfonimidoyl fluoride is weakly UV active; *p*-anisaldehyde or PMA stain should be used to visualize by TLC.
4. The sulfinyl urea intermediate is not stable under aqueous conditions but can be detected by LC-MS (reverse phase H<sub>2</sub>O/MeCN 0.1% formic acid).
5. The solid filtered is the sodium salt by-product from NFSI. On smaller scales (< 1 g of *t*-Bu sulfinamide) workups without filtration were employed.
6. Removal of unreacted NFSI by washing with KI (10% aqueous solution) allows for easier purification and filtration through a silica plug of silica using hexanes/EtOAc (0-20% EtOAc) is sufficient if long-term storage of *t*-BuSF is not required (*vide infra*).
7. Racemic *t*-BuSF was prepared using the same method from commercially available racemic sulfinamide.
8. When Selectfluor (1.2 eq.) was used as the fluorinating agent, ***t*-BuSF** was obtained in 82% yield and 93.5% ee.

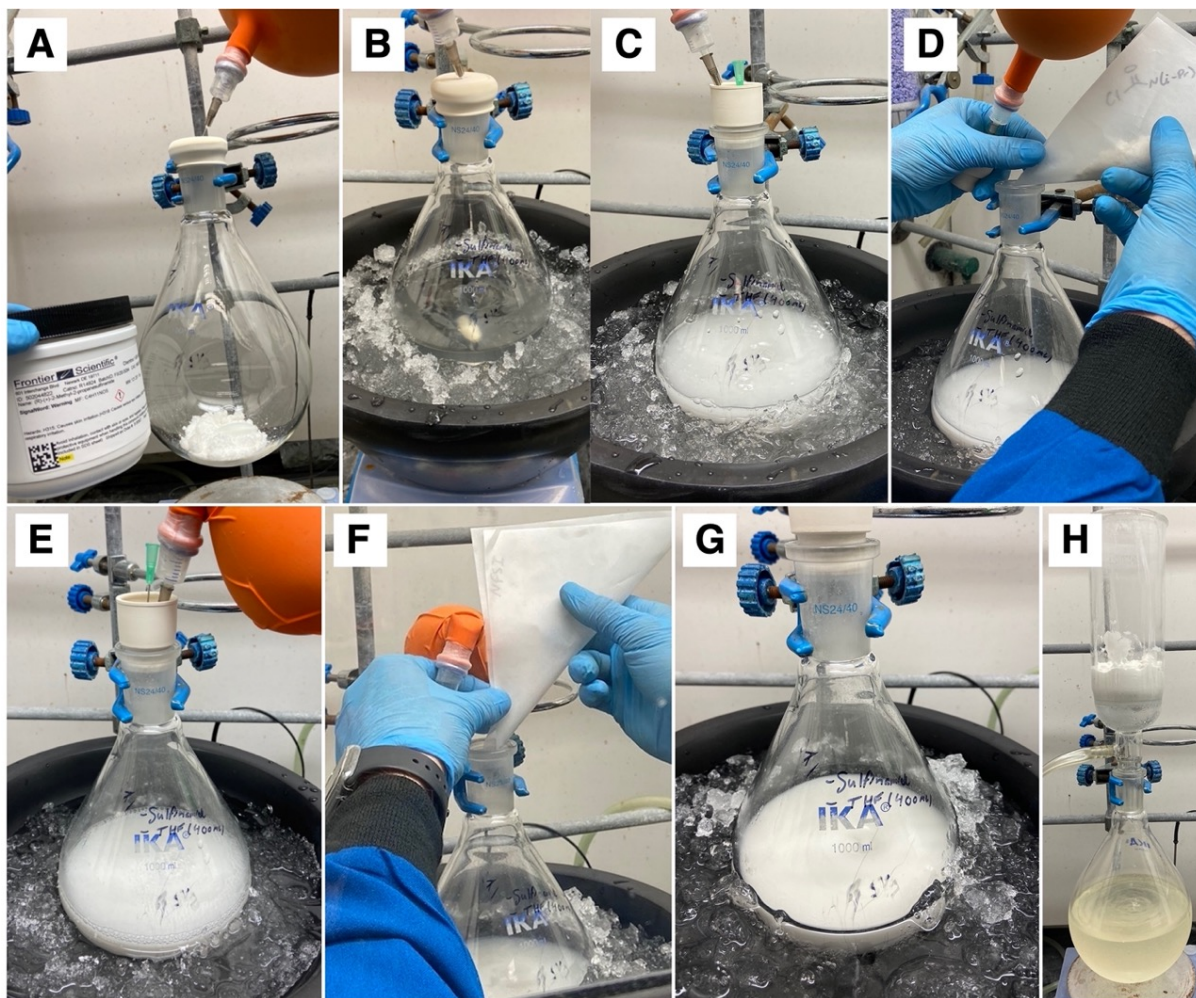

**Graphical Procedure 2:** Decagram scale synthesis of **(S)-t-BuSF**. **A.** Addition of **(R)-t-Bu** sulfinamide to the reaction flask. **B.** **(R)-t-Bu** sulfinamide dissolved in THF (400 mL) at 0 °C. **C.** Reaction mixture after portion-wise addition of NaH. **D.** First addition of **DIP-CCl** to the reaction mixture. **E.** Reaction mixture after addition of **DIP-CCl** (evolution of H<sub>2</sub> gas). **F.** Addition of NFSI in a single portion. **G.** Reaction mixture after the addition of NFSI (thick slurry). **H.** Filtration of NFSI by-product from reaction mixture through a sintered glass funnel prior to aqueous workup.

**Expedient purification of *t*-BuSF using a silica gel plug.**

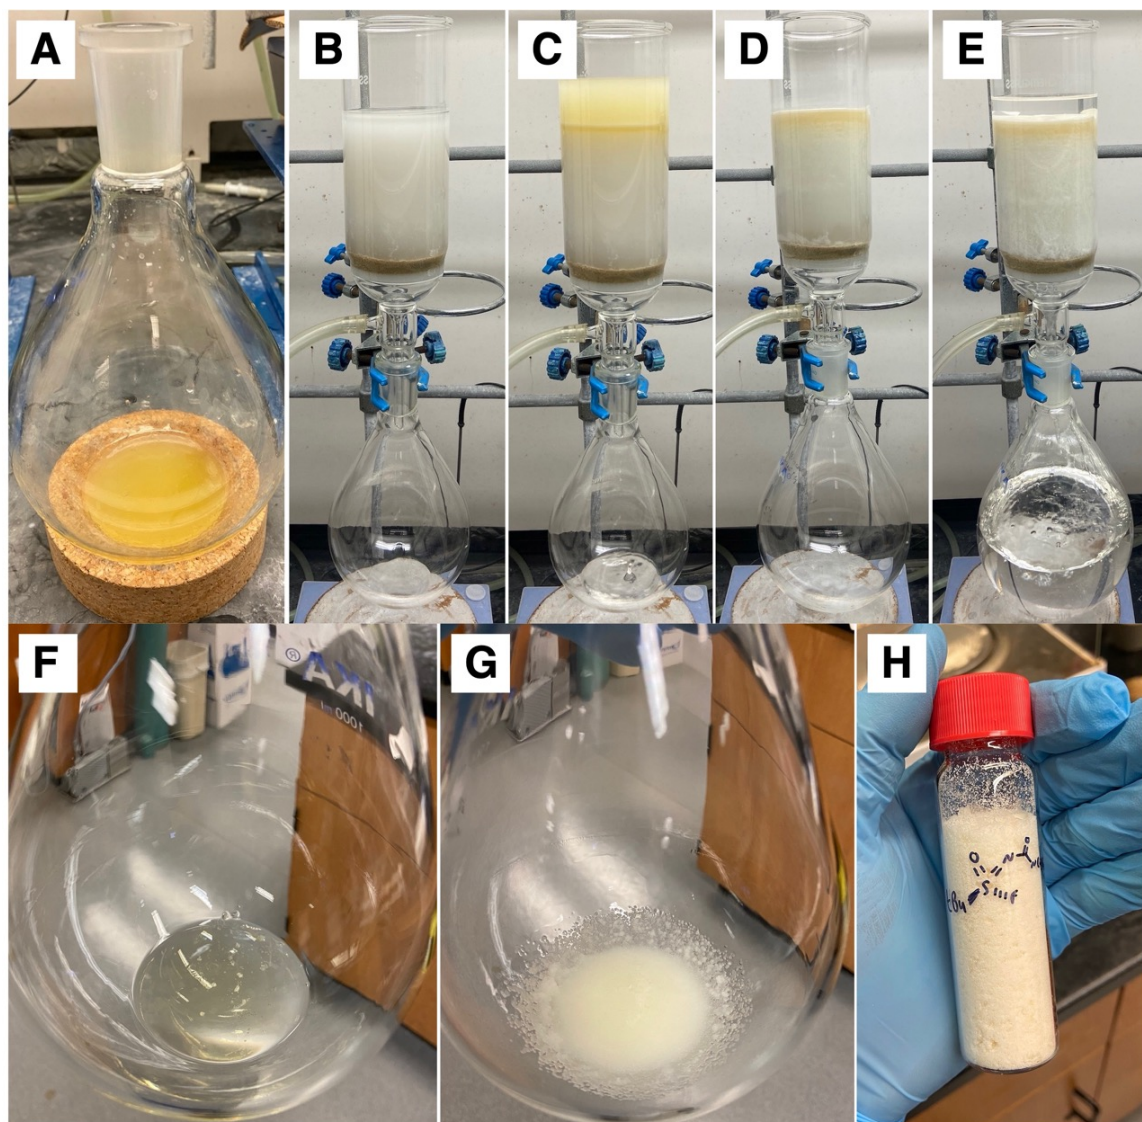

**Graphical Procedure 3:** Filter purification of (*S*)-*t*-BuSF. **A.** Crude reaction mixture after aqueous workup. **B.** Silica gel plug (250 g) slurry with hexanes. **C.** Addition of crude reaction mixture to silica gel plug using hexanes. **D.** After filtering with hexanes (100 mL) and 10% EtOAc in hexanes (100 mL). **E.** Elution of *t*-BuSF using 20% EtOAc in hexanes (500 mL) to give the first fraction. **F.** Concentrated first collected fraction of *t*-BuSF to give an oil. **G.** Crystallization of *t*-BuSF upon standing. **H.** Final collection and storage of *t*-BuSF.

## II. Stability study of N-protected sulfonimidoyl fluorides

### IIa. Bench stability analysis of *t*-BuSF.

***t*-BuSF** was prepared following the general procedure and stored on the lab bench in a colorless 20 mL capped vial (no exchange with argon). Room temperature was variable (23–26 °C) and humidity was roughly 55%. *t*-BuSF samples were prepared from the same batch, separated into three different vials and compared with freshly prepared material. Stability analysis using  $^1\text{H}$ -NMR,  $^{19}\text{F}$ -NMR and  $^{13}\text{C}$ -NMR were used and accompanied by a reaction performance analysis (% yield and % ee) using phenyl lithium as the nucleophile over the course of 7 months.

Based on the NMR analysis, no significant decomposition was observed over seven months. The only identifiable peaks were that of diisopropyl amine (presumably forms via decomposition pathway). Reaction performance analysis provided identical enantiopurity of products with slightly diminished yields (up to 10%). The data collected from this stability study and our hands-on use of *t*-BuSF over the course of this study, *t*-BuSF is bench stable for >7 months and a single batch has been routinely used for over a year.

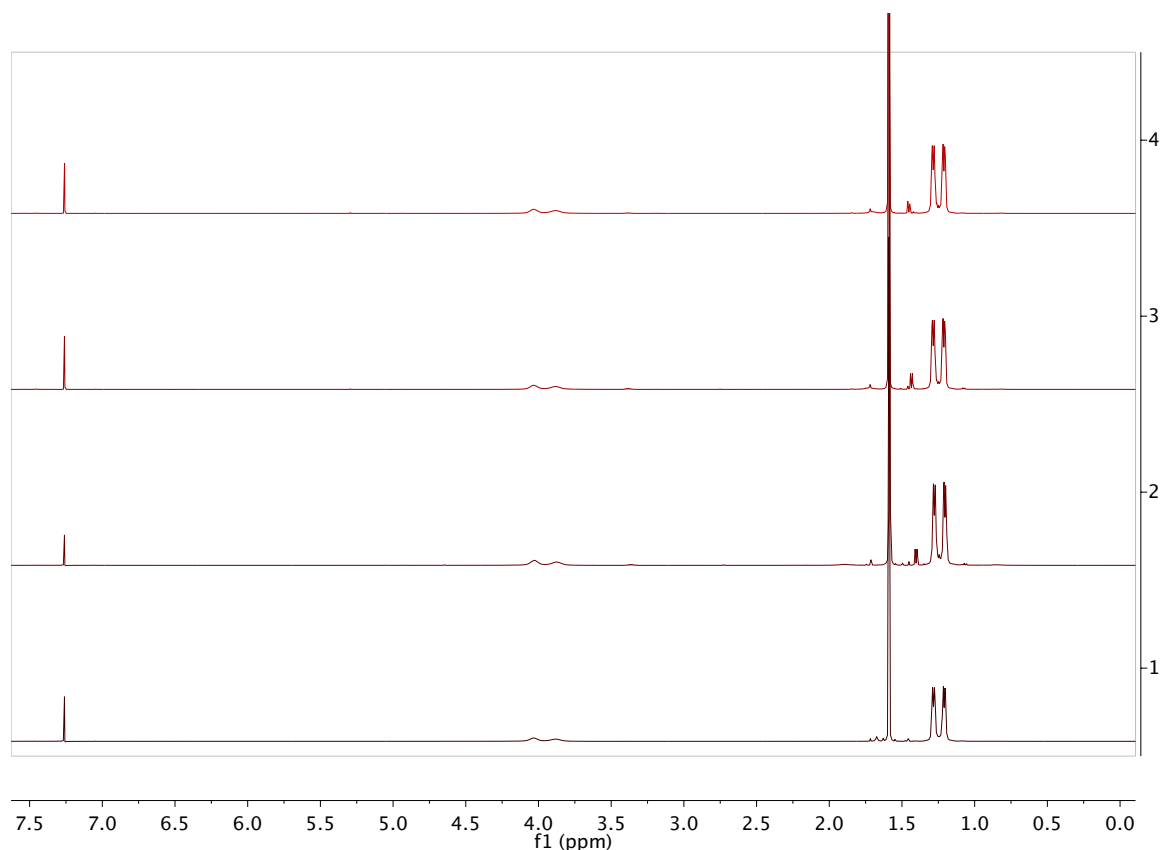

**Figure S1:**  $^1\text{H}$  NMR analysis of *t*-BuSF stored at room temperature under an atmosphere of air. 1) *t*-BuSF control that was freshly prepared. Entries 2–4 are the three different samples used to determine bench stability after 7 months. All samples were prepared using  $\text{CDCl}_3$ .

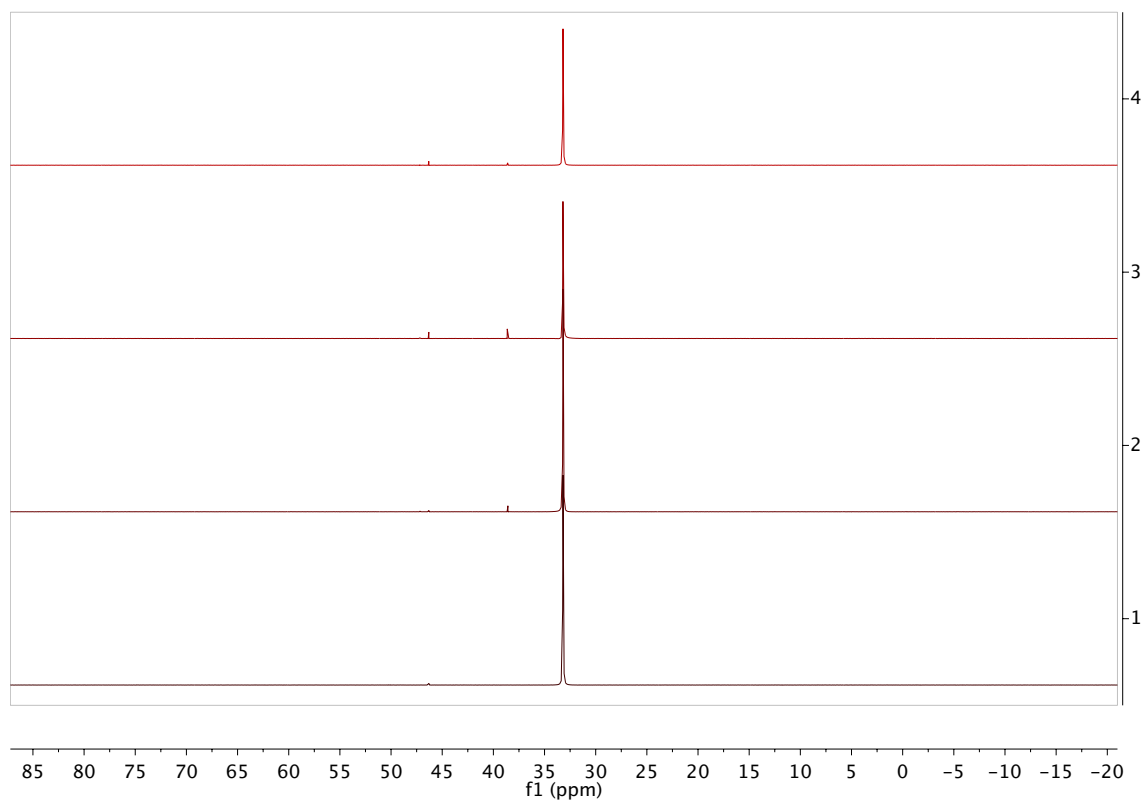

**Figure S2:**  $^{19}\text{F}$  NMR analysis of  $t\text{-BuSF}$  stored at room temperature under an atmosphere of air. 1)  $t\text{-BuSF}$  control that was freshly prepared. Entries 2–4 are the three different samples used to determine bench stability after 7 months. All samples were prepared using  $\text{CDCl}_3$ .

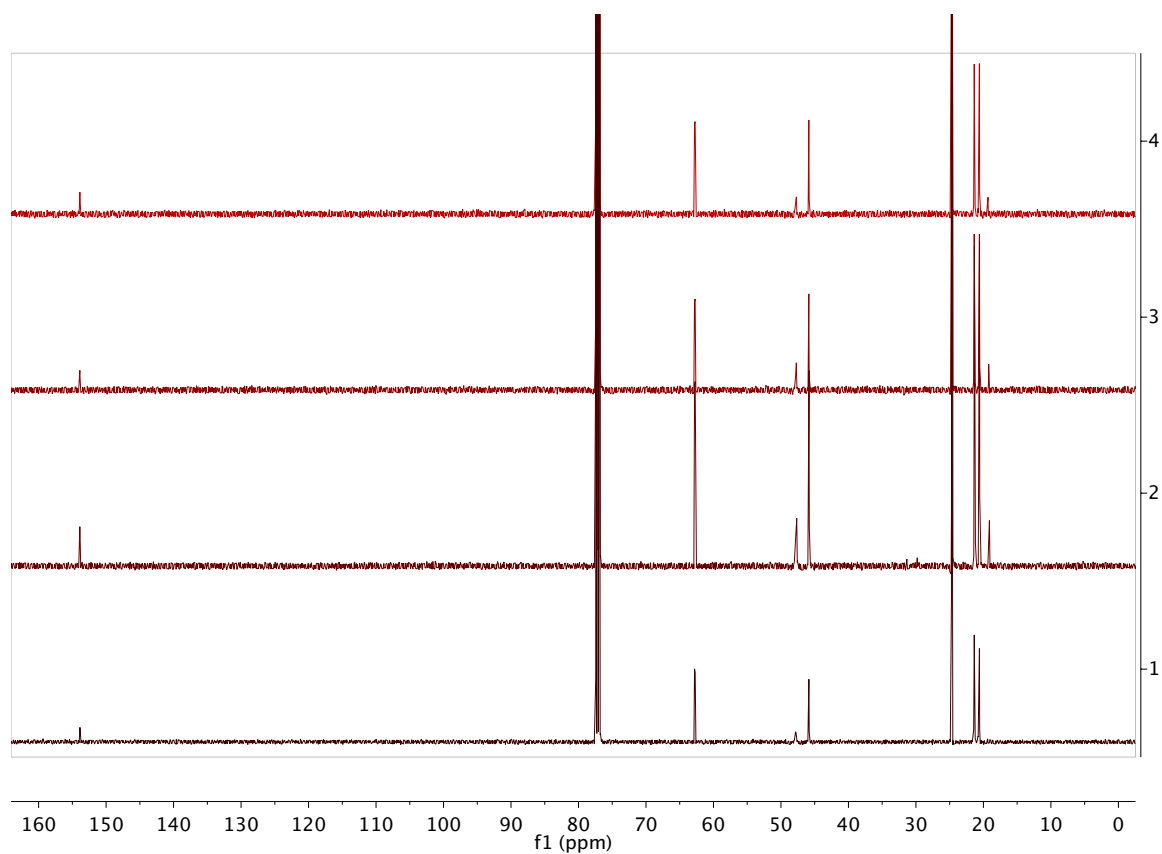

**Figure S3:**  $^{13}\text{C}$  NMR analysis of  $t\text{-BuSF}$  stored at room temperature under an atmosphere of air. 1)  $t\text{-BuSF}$  control that was freshly prepared. Entries 2–4 are the three different samples used to determine bench stability after 7 months. All samples were prepared using  $\text{CDCl}_3$ .

## IIb. Thermal stability of *tert*-butyl sulfonimidoyl fluoride reagents.

The thermal stability of ***t*-BuSF** was performed and compared to other protected *t*-Bu sulfonimidoyl fluorides. Three different solvents were used as a thermal distribution of 35–110 °C. Each sample (0.2 mmol, 0.1 M) was refluxed in the respective solvent: Et<sub>2</sub>O (35 °C), THF (66 °C) and toluene (110 °C) for 24 hours. **Note:** *anhydrous solvents and conditions were not employed.* After 24 hours of heating, the reactions were cooled to room temperature, the solvent was removed under reduced pressure, and the remaining residue dissolved in CDCl<sub>3</sub> then analyzed by NMR (<sup>1</sup>H and <sup>19</sup>F).

### IIb-1. Thermal stability of *t*-BuSF.

Based on the NMR analysis of *t*-BuSF, significant decomposition was only observed when heating at 110 °C in toluene for 24 hours. We were unable to identify the by-products besides diisopropyl amine. Decomposition was not observed at room temperature in all solvents used.

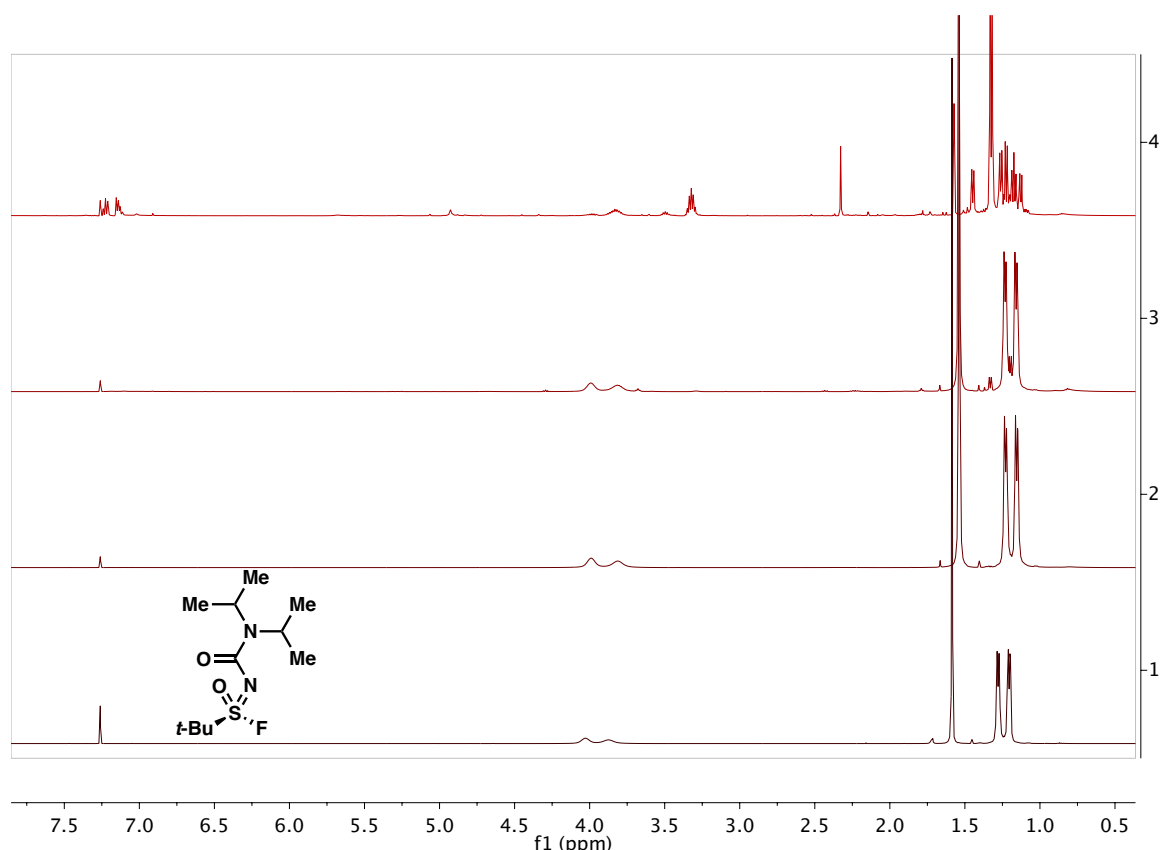

**Figure S4:** <sup>1</sup>H NMR analysis of *t*-BuSF after refluxing in three different solvents over 24 hours. 1) *t*-BuSF control. 2) *t*-BuSF refluxed (35 °C) in Et<sub>2</sub>O. 3) *t*-BuSF refluxed (66 °C) in THF. 4) *t*-BuSF refluxed (110 °C) in toluene. All samples were prepared using CDCl<sub>3</sub>.

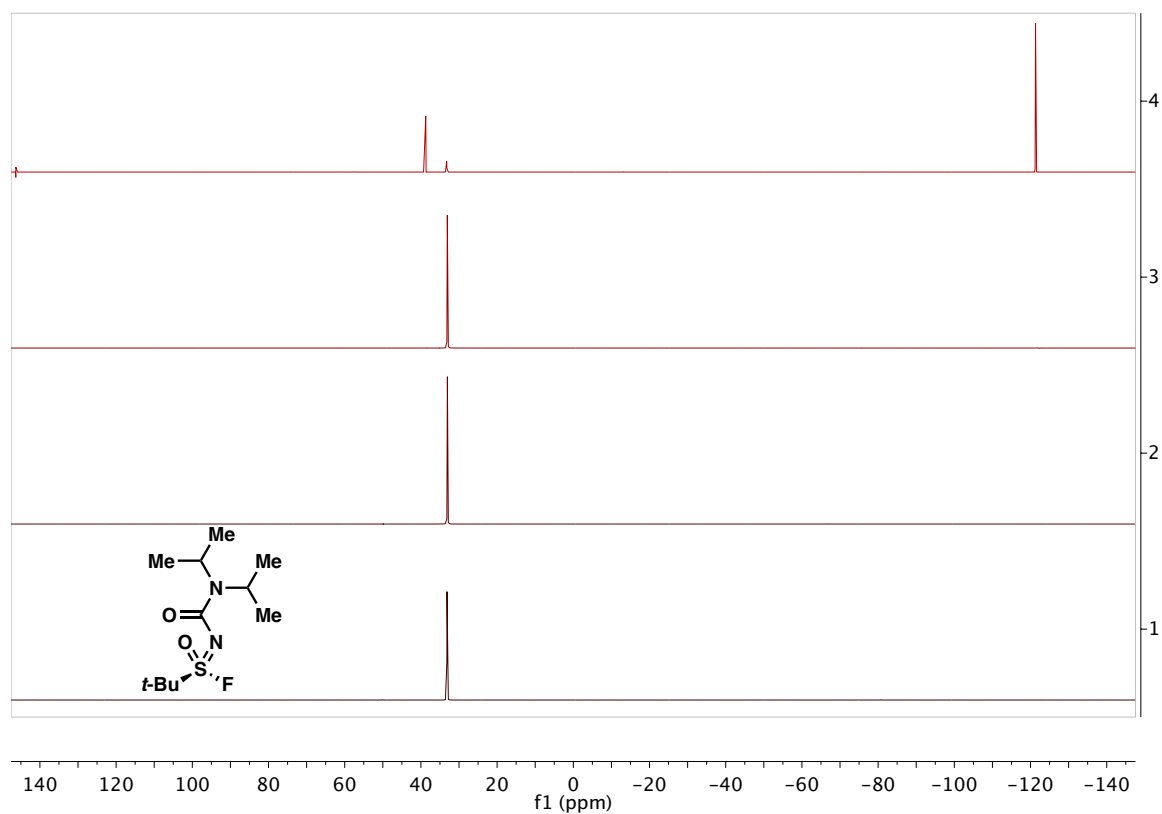

**Figure S5:**  $^{19}\text{F}$  NMR analysis of *t*-BuSF after refluxing in three different solvents over 24 hours. 1) *t*-BuSF control. 2) *t*-BuSF refluxed (35 °C) in  $\text{Et}_2\text{O}$ . 3) *t*-BuSF refluxed (66 °C) in THF. 4) *t*-BuSF refluxed (110 °C) in toluene. All samples were prepared using  $\text{CDCl}_3$ .

### IIb-2. Thermal stability comparison of different protecting groups.

Four different protecting groups were evaluated for their thermal stability: two urea-based ( $-\text{CON}(i\text{-Pr})_2$ ,  $-\text{CONEt}_2$ ) one carbamate ( $-\text{Boc}$ ) and one acyl ( $-\text{Piv}$ ). Other protecting groups including silyl ( $-\text{TBS}$ ,  $-\text{TBDPS}$ ),  $-\text{tosyl}$ , and  $-\text{benzyl}$  were unable to be prepared and evaluated due to reactivity or stability issues of the sulfinamide precursors and/or sulfonylimidoyl fluoride products.

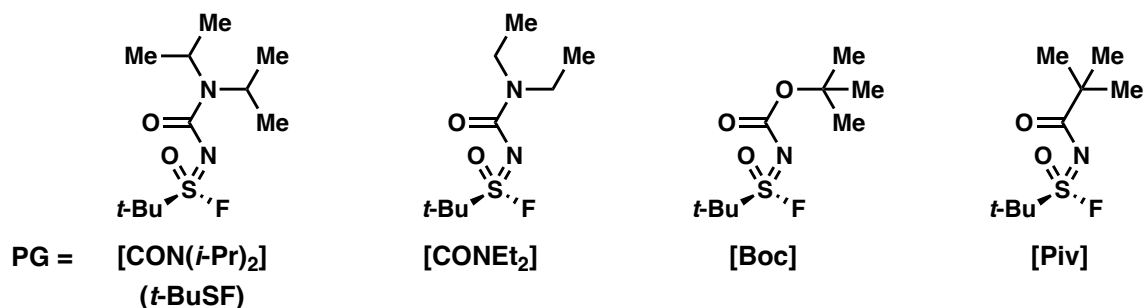

**Figure S6:** *t*-Bu sulfonylimidoyl fluorides prepared and analyzed for thermal stability.

Experimental procedures and analyses were identical to those described above for *t*-BuSF. <sup>1</sup>H NMR was found to provide greater diagnostic evidence of decomposition compared to <sup>19</sup>F NMR. The urea protecting groups were both found to have increased stability under the thermal conditions relative to carbamate and acyl protecting groups. Both  $-\text{Boc}$  and  $-\text{Piv}$  protecting groups exhibited significant decomposition after refluxing (66 °C) in THF for 24 hours. No obvious decomposition was observed when refluxing (35 °C) in Et<sub>2</sub>O for 24 hours across all four protected sulfonylimidoyl fluorides.

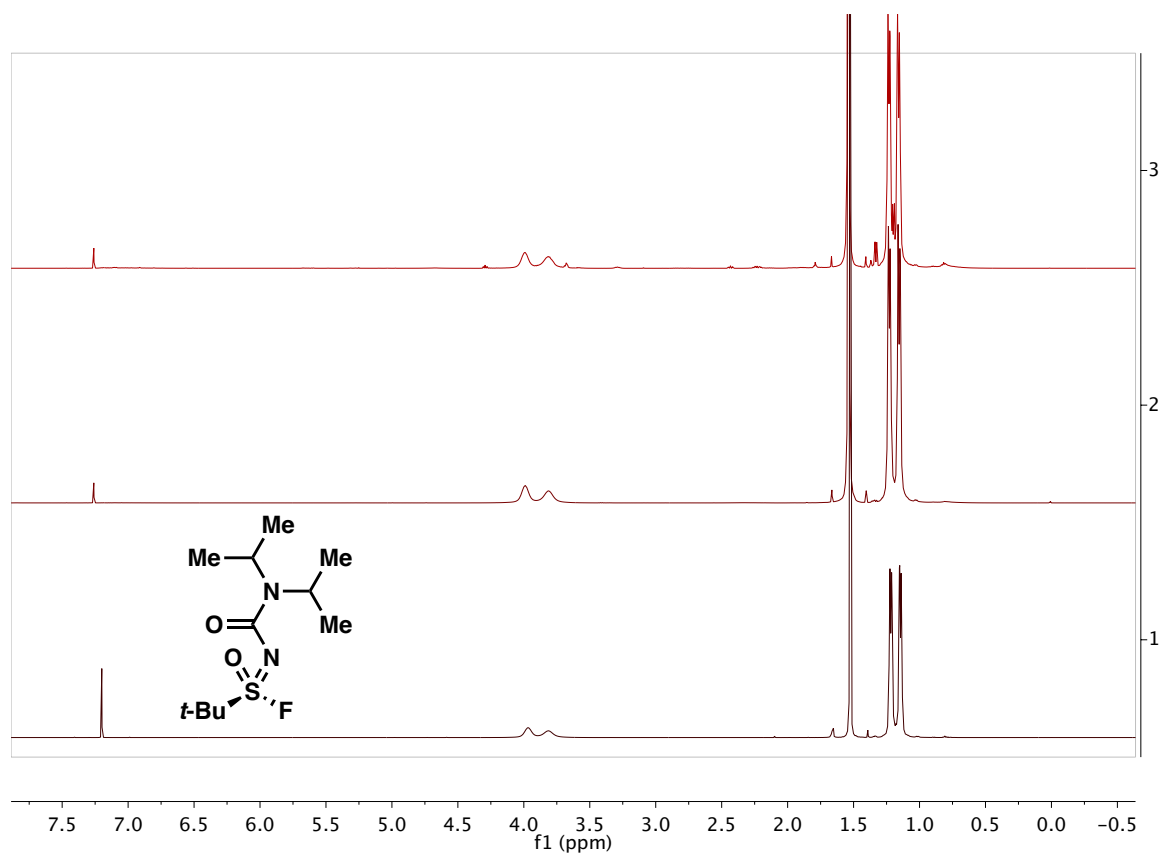

**Figure S7:**  $^1\text{H}$  NMR analysis of *t*-BuSF after refluxing in  $\text{Et}_2\text{O}$  and THF over 24 hours. 1) *t*-BuSF control. 2) *t*-BuSF refluxed (35 °C) in  $\text{Et}_2\text{O}$ . 3) *t*-BuSF refluxed (66 °C) in THF. All samples were prepared using  $\text{CDCl}_3$ .

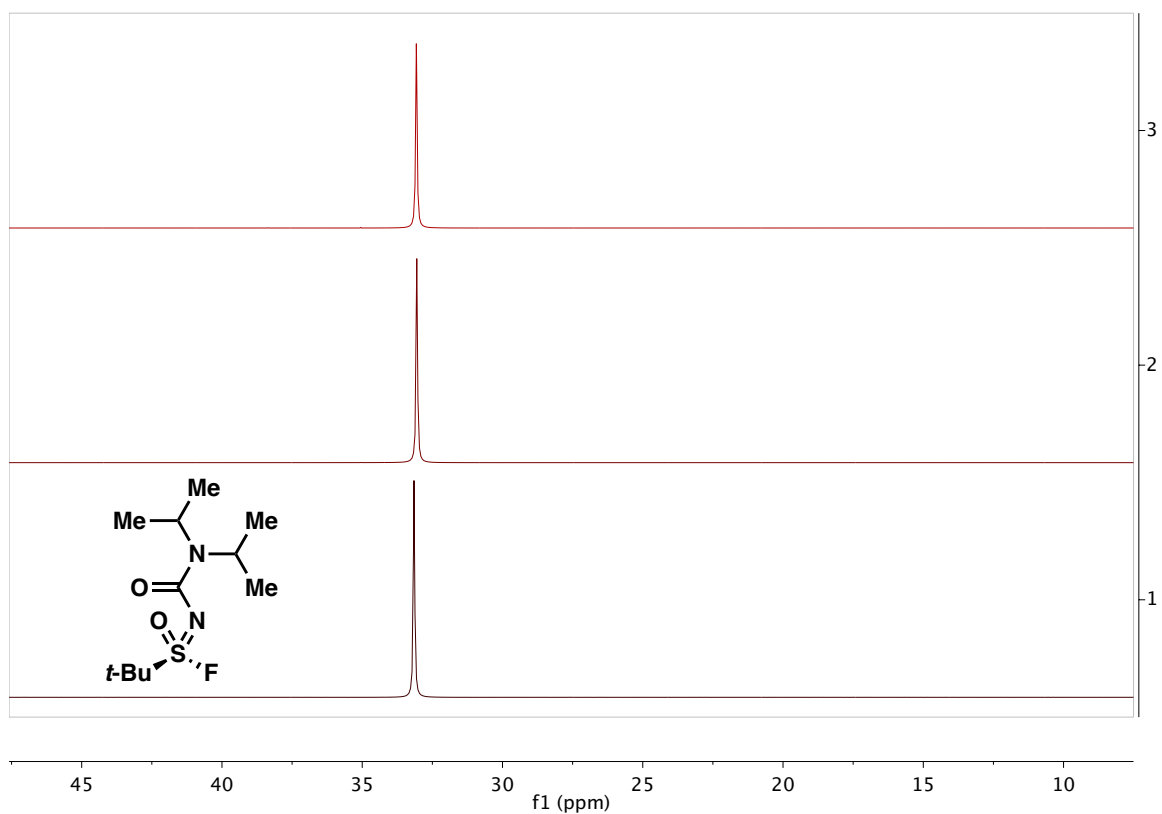

**Figure S8:**  $^{19}\text{F}$  NMR analysis of *t*-BuSF after refluxing in  $\text{Et}_2\text{O}$  and THF over 24 hours. 1) *t*-BuSF control. 2) *t*-BuSF refluxed (35 °C) in  $\text{Et}_2\text{O}$ . 3) *t*-BuSF refluxed (66 °C) in THF. All samples were prepared using  $\text{CDCl}_3$ .

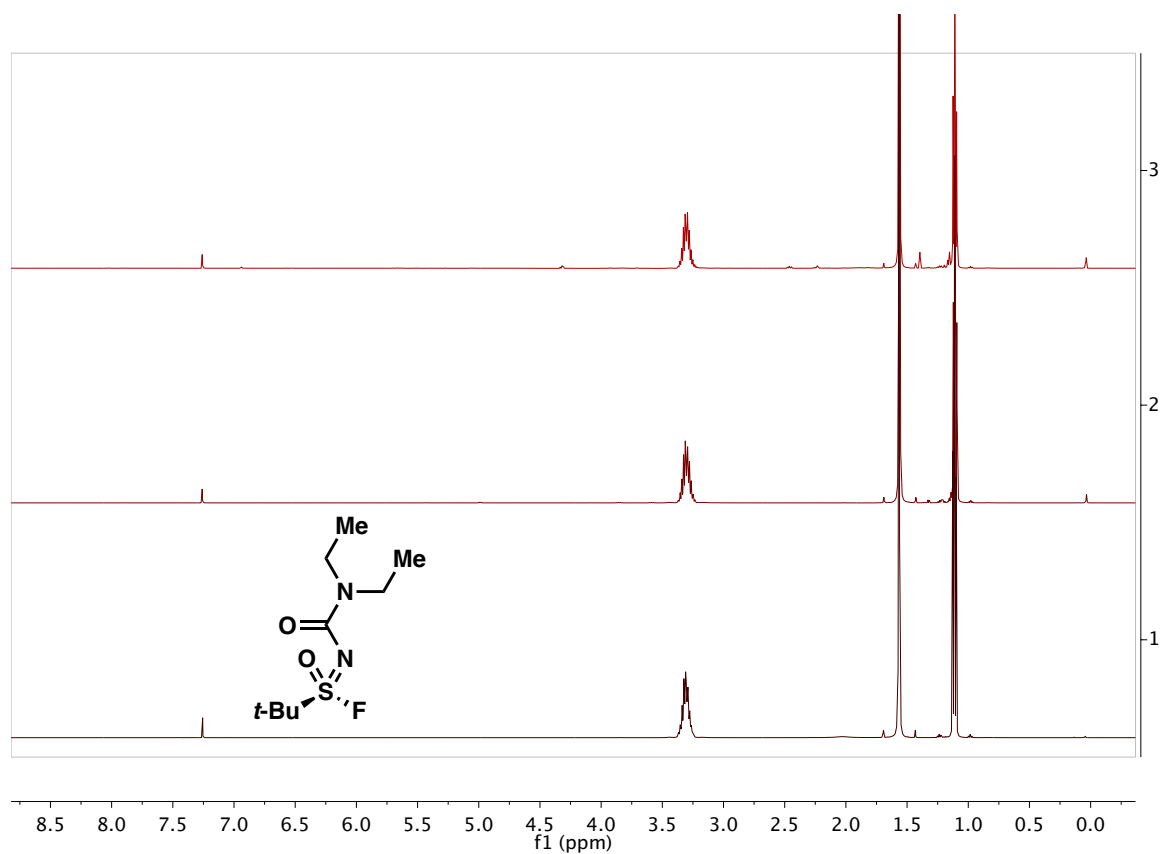

**Figure S9:**  $^1\text{H}$  NMR analysis of  $-\text{CONEt}_2$  urea protected *t*-Bu sulfonimidoyl fluoride after refluxing in  $\text{Et}_2\text{O}$  and THF over 24 hours. 1)  $\text{CONEt}_2$  protected *t*-Bu sulfonimidoyl fluoride control. 2) after refluxing (35 °C) in  $\text{Et}_2\text{O}$ . 3) after refluxing (66 °C) in THF. All samples were prepared using  $\text{CDCl}_3$ .

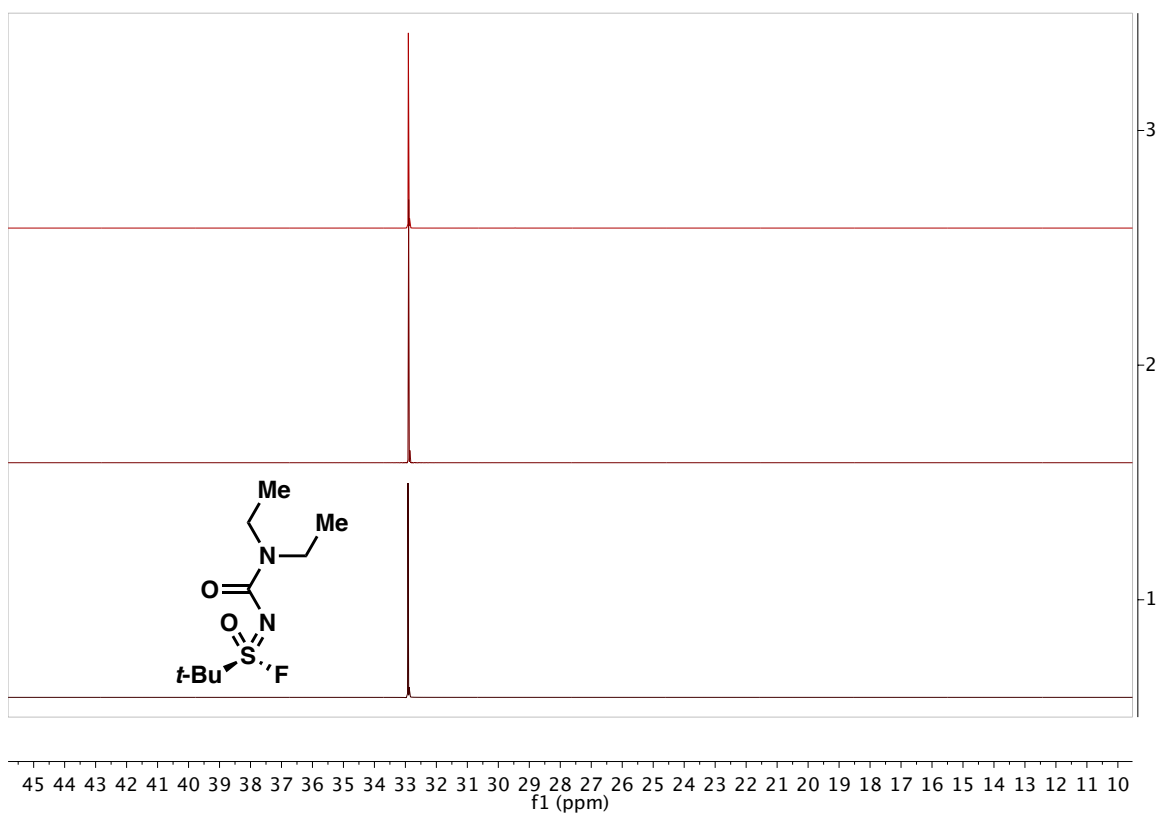

**Figure S10:**  $^{19}\text{F}$  NMR analysis of  $-\text{CONEt}_2$  urea protected *t*-Bu sulfonimidoyl fluoride after refluxing in  $\text{Et}_2\text{O}$  and THF over 24 hours. 1)  $\text{CONEt}_2$  protected *t*-Bu sulfonimidoyl fluoride control. 2) after refluxing (35 °C) in  $\text{Et}_2\text{O}$ . 3) after refluxing (66 °C) in THF. All samples were prepared using  $\text{CDCl}_3$ .

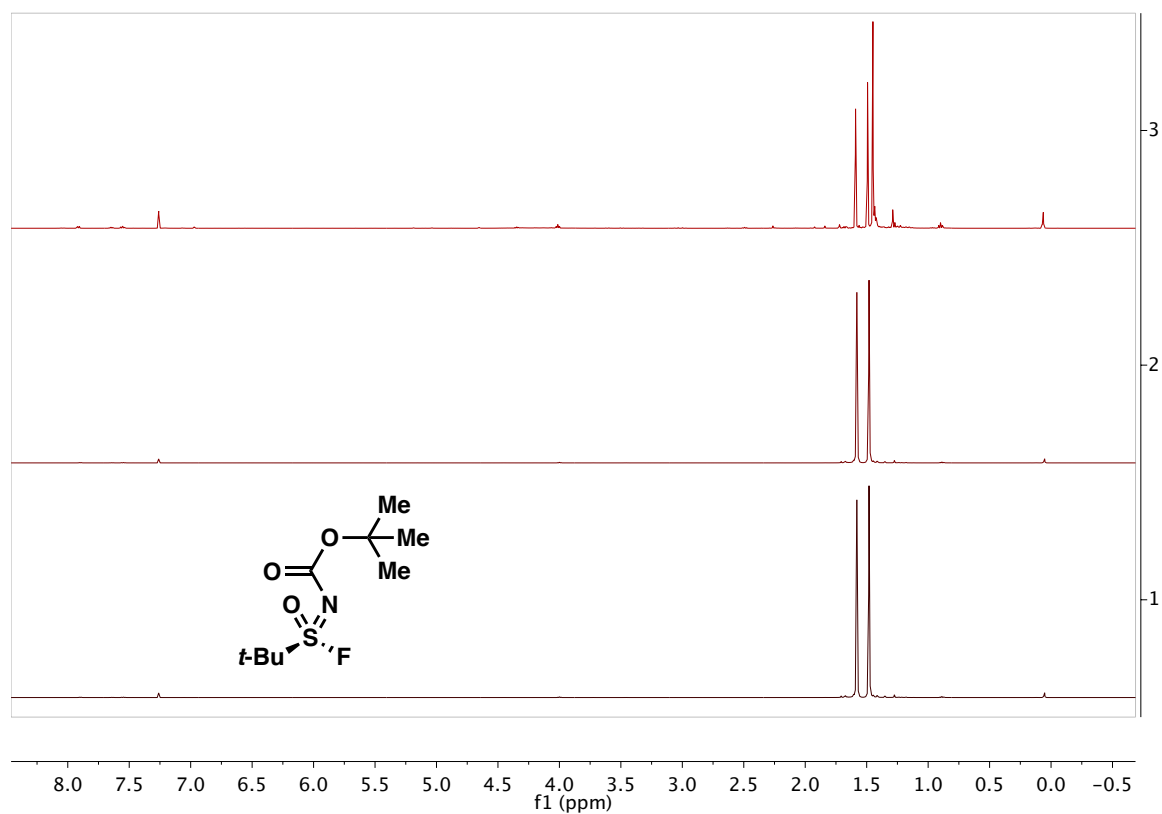

**Figure S11:**  $^1\text{H}$  NMR analysis of *t*-Boc protected *t*-Bu sulfonimidoyl fluoride after refluxing in  $\text{Et}_2\text{O}$  and THF over 24 hours. 1) *t*-Boc protected *t*-Bu sulfonimidoyl fluoride control. 2) after refluxing (35 °C) in  $\text{Et}_2\text{O}$ . 3) after refluxing (66 °C) in THF. All samples were prepared using  $\text{CDCl}_3$ .

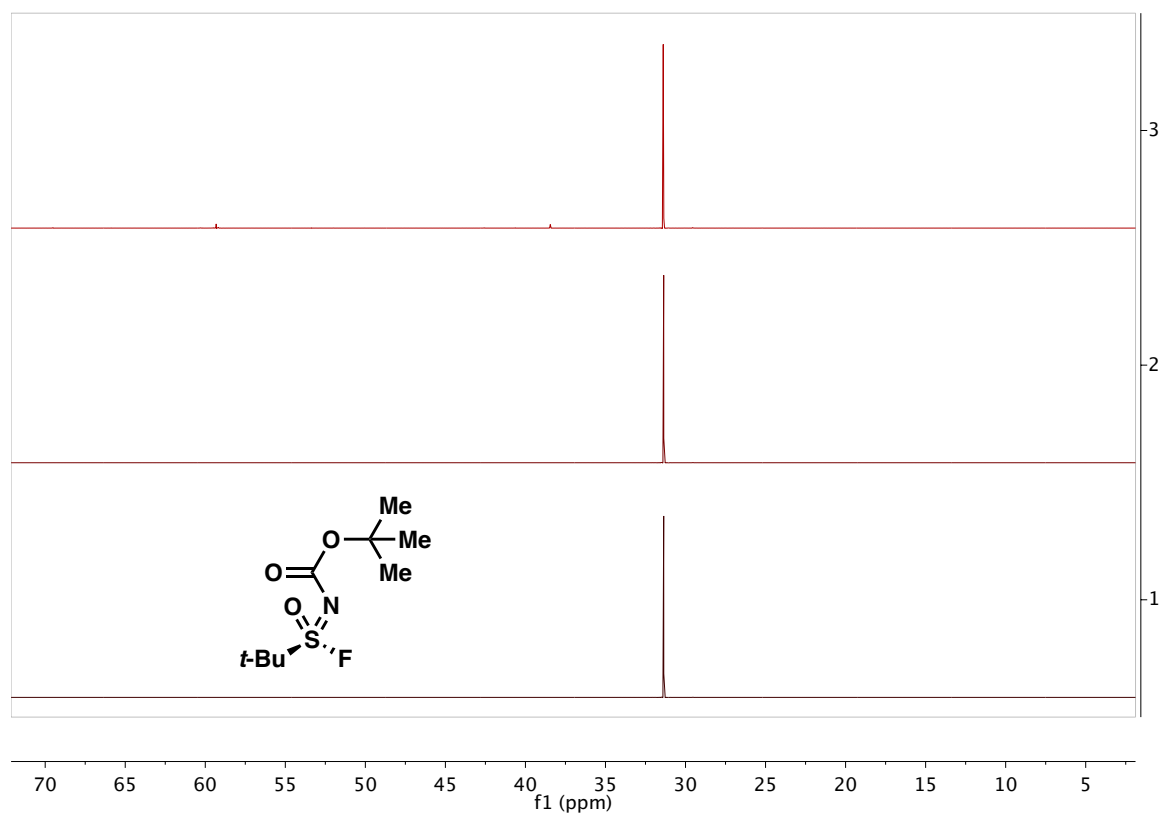

**Figure S12:**  $^{19}\text{F}$  NMR analysis of –Boc protected *t*-Bu sulfonimidoyl fluoride after refluxing in  $\text{Et}_2\text{O}$  and THF over 24 hours. 1) –Boc protected *t*-Bu sulfonimidoyl fluoride control. 2) after refluxing (35 °C) in  $\text{Et}_2\text{O}$ . 3) after refluxing (66 °C) in THF. All samples were prepared using  $\text{CDCl}_3$ .

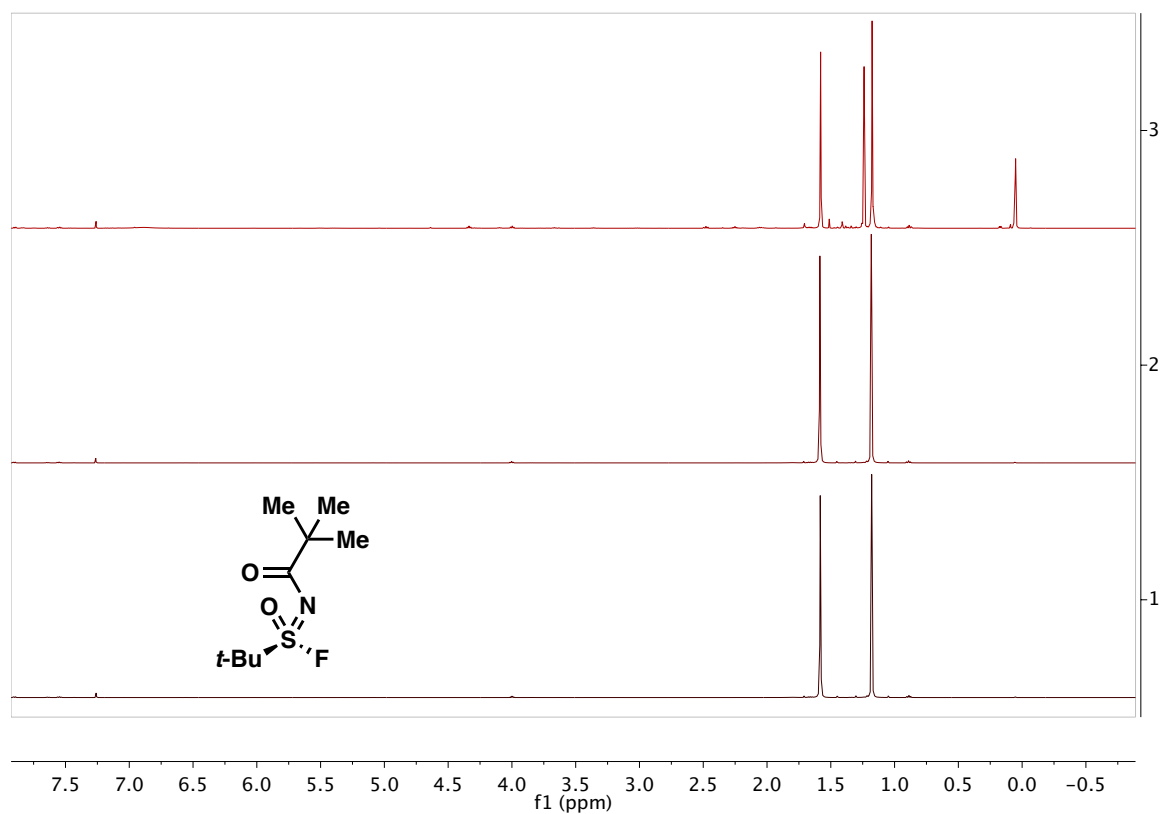

**Figure S13:**  $^1\text{H}$  NMR analysis of –Piv protected *t*-Bu sulfonimidoyl fluoride after refluxing in  $\text{Et}_2\text{O}$  and THF over 24 hours. 1) –Piv protected *t*-Bu sulfonimidoyl fluoride control. 2) after refluxing (35 °C) in  $\text{Et}_2\text{O}$ . 3) after refluxing (66 °C) in THF. All samples were prepared using  $\text{CDCl}_3$ .

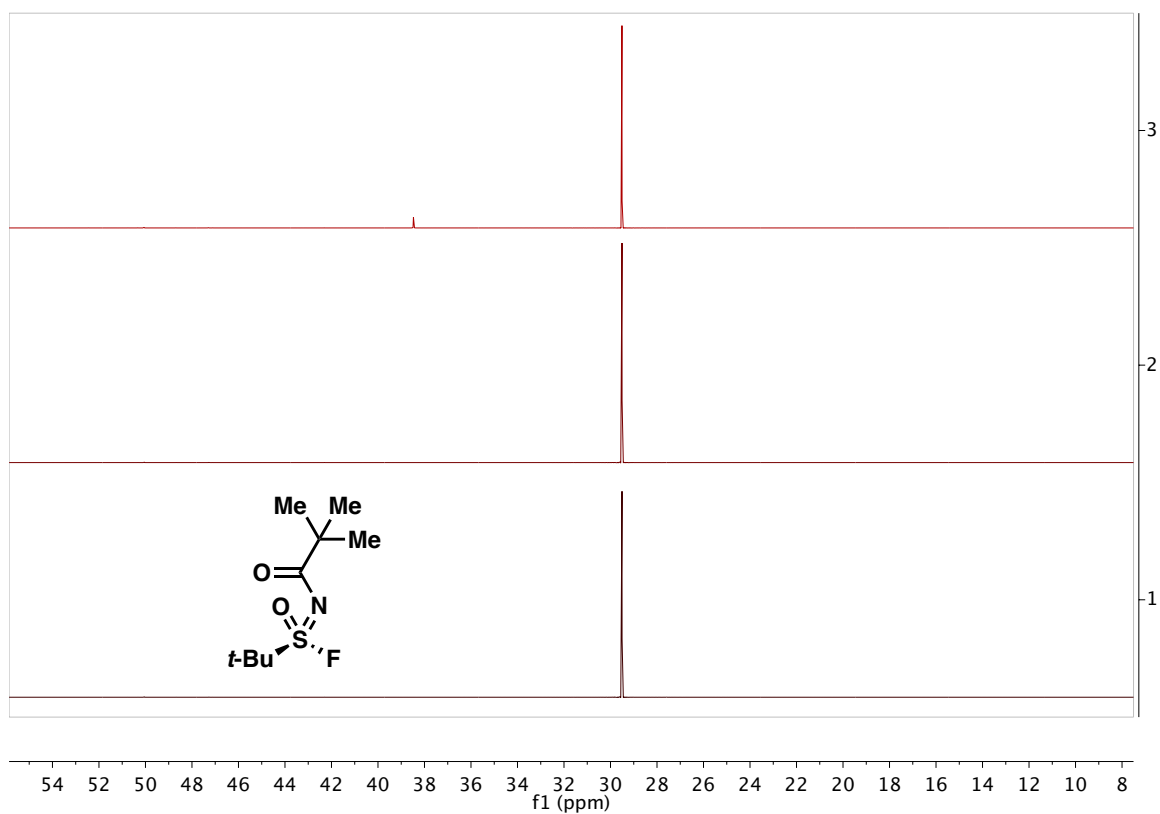

**Figure S14:**  $^{19}\text{F}$  NMR analysis of –Piv protected *t*-Bu sulfonimidoyl fluoride after refluxing in  $\text{Et}_2\text{O}$  and THF over 24 hours. 1) –Piv protected *t*-Bu sulfonimidoyl fluoride control. 2) after refluxing (35 °C) in  $\text{Et}_2\text{O}$ . 3) after refluxing (66 °C) in THF. All samples were prepared using  $\text{CDCl}_3$ .

### IIc. Stereogenic stability of *t*-BuSF in the presence of fluoride ions.

Stereogenic stability analysis of *t*-BuSF was performed in the presence of different fluoride ions. NaF, KF and TBAF were used as the fluoride sources. One blank sample was set as the control.

To a solution of *t*-BuSF (0.2 mmol) in Et<sub>2</sub>O (0.1 M), the fluoride source (1.0 eq) was added. Stirred at room temperature for 24 h. The reaction mixture was filtered, and an aliquot was transferred into a HPLC vial then concentrated under reduced pressure. HPLC samples were prepared by dissolution in *i*-PrOH prior to analysis. **Note:** samples were prepared from reaction mixtures and not from crude solids.

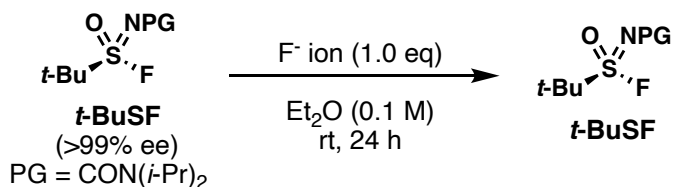

| Entry | Fluoride Source | Enantiopurity (% ee) |
|-------|-----------------|----------------------|
| 1     | None            | > 99                 |
| 2     | NaF             | > 99                 |
| 3     | KF              | > 99                 |
| 4     | TBAF            | 97.3                 |

**Table S1:** All reactions were performed with 0.2 mmol of *t*-BuSF in Et<sub>2</sub>O (0.1 M) and 1.0 eq. of the fluoride source. Reactions were stirred at room temperature for 24 h. Enantiomeric excess (% ee) was determined by chiral HPLC analysis.

### III. Sulfonimidoyl transfer: First S-functionalization of *t*-BuSF.

#### IIIa. Reaction optimization using phenyl lithium.

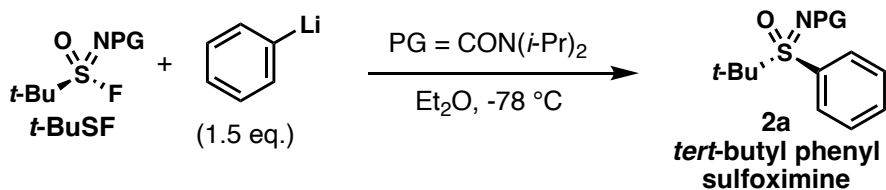

| Entry | Variations                               | Enantiopurity (% ee) | Yield (%) <sup>a</sup> |
|-------|------------------------------------------|----------------------|------------------------|
| 1     | None <sup>c</sup>                        | 98.3                 | 87                     |
| 2     | THF                                      | NA <sup>b</sup>      | <5                     |
| 3     | 2-Me-THF                                 | 96.4                 | 15                     |
| 4     | CPME                                     | 98.3                 | 80                     |
| 5     | DME <sup>d</sup>                         | 96.0                 | 75                     |
| 6     | MTBE                                     | 95.6                 | 42                     |
| 7     | PhMe                                     | 96.5                 | 50                     |
| 8     | dibutyl ether                            | 95.6                 | 45                     |
| 9     | Et <sub>2</sub> O/THF= 8:1               | 97.4                 | 67                     |
| 10    | Et <sub>2</sub> O/hexane= 8:1            | 96.2                 | 60                     |
| 11    | PhLi (1.0 eq.)                           | 98.2                 | 55                     |
| 12    | 0 °C                                     | 91.1                 | 83                     |
| 13    | -50 °C                                   | 96.3                 | 85                     |
| 14    | TMEDA (1.5 eq.) as additive              | 93                   | 75                     |
| 15    | HMPA (1.0 eq.) as additive               | 96                   | 74                     |
| 16    | HMPA (10 eq.) as additive                | NA <sup>b</sup>      | 0                      |
| 17    | DMPU (1 eq.) as additive                 | 97.4                 | 74                     |
| 18    | TBAB (1.0 eq.) as additive               | 95                   | 73                     |
| 19    | TBAI (1.0 eq.) as additive               | 96                   | 73                     |
| 20    | LiBr (2.0 eq.) as additive               | 97.5                 | 80                     |
| 21    | LiClO <sub>4</sub> (1.0 eq.) as additive | 98.2                 | 48                     |
| 22    | LiClO <sub>4</sub> (2.0 eq.) as additive | 96.2                 | 32                     |
| 23    | NFSI (0.15 eq.) as additive              | 91.3 <sup>e</sup>    | 79                     |

|    |                                            |                 |     |
|----|--------------------------------------------|-----------------|-----|
| 23 | <i>t</i> -BuSF added (0.1 mL/min)          | 98.4            | 81  |
| 24 | <i>t</i> -BuSF added (0.05 mL/min)         | 98.3            | 83  |
| 25 | <i>t</i> -BuSF added (0.025 mL/min)        | 98.3            | 81  |
| 26 | <i>t</i> -BuSF added (0.01 mL/min), 0.05 M | 98.2            | 75  |
| 27 | <i>t</i> -BuSF added (0.01 mL/min), 0.2 M  | 98.3            | 74  |
| 28 | PhLi added (0.1 mL/min)                    | 97.6            | 80  |
| 29 | PhLi added (0.05 mL/min)                   | 98.2            | 92  |
| 30 | PhLi added (0.025 mL/min)                  | 98.4            | 83  |
| 31 | PhLi added (0.01 mL/min)                   | 98.5            | 91  |
| 32 | PhLi added (0.01 mL/min), 0.05 M           | 98.2            | 81  |
| 33 | PhLi added (0.01 mL/min), 0.2 M            | 97.5            | 73  |
| 34 | PG = CON(Me) <sub>2</sub>                  | NA <sup>b</sup> | 0   |
| 35 | PG = CON(Et) <sub>2</sub>                  | NA <sup>b</sup> | < 5 |
| 36 | PG = Piv                                   | NA <sup>b</sup> | 0   |
| 37 | PG = Boc                                   | NA <sup>b</sup> | < 5 |
| 38 | PG = Bz                                    | NA <sup>b</sup> | 0   |

**Table S2:** All reactions were performed on a 0.3 mmol scale and ***t*-BuSF** added dropwise to PhLi (1.9 M in dibutyl ether) at -78 °C unless otherwise stated. Reactions were quenched within 1 hour after addition. Enantiopurity was determined by chiral HPLC relative to a racemic standard. <sup>a</sup>Isolated yield. <sup>b</sup>Not available. <sup>c</sup>No observable difference in yield or % ee when forming PhLi *in situ* using GP-1 or GP-2. <sup>d</sup>1,2-dimethoxyethane (DME) was warmed to -50 °C due to its melting point. <sup>e</sup>*t*-BuSF (93.5% ee) prepared using Selectfluor instead of NFSI. Addition rates (entries 23-33) were controlled via syringe pump.

During reagent development, we noticed the choice of solvent played a crucial role in reactivity and stereospecificity sulfonylimidoyl transfers. Polar and non-polar aprotic solvents were evaluated (entries 1-10) where Et<sub>2</sub>O and cyclopropylmethyl ether (CPME, entry 4) were found to give the highest isolated yields (87% and 80% yield) and identical enantiopurity (98.3% ee). Surprisingly, THF (entry 2) provided no observable conversion at -78 °C or after warming to room temperature, despite additional equivalents of nucleophile (up to 5 eq.)—while 2-MeTHF (entry 3) gave a 15% yield with 96% ee. However, when THF was used as a co-solvent (8:1 Et<sub>2</sub>O/THF, entry 9) reactivity was recovered with a slight decrease in enantiopurity. Other ethereal solvents including 1,2-dimethoxyethane (DME, entry 5), methyl *tert*-butyl ether (MTBE, entry 6), dibutyl ether (entry 8) and a mixture of Et<sub>2</sub>O/hexanes (8:1, entry 9) delivered the desired sulfoximine, albeit in lower yields and slightly lower enantiopurities. When a non-polar aprotic solvent such as toluene was used (entry 7), the target sulfoximine was isolated in

a 50% yield with 96% ee. The temperature at which the reaction is initiated was found to have an even greater negative influence on the stereochemistry (entries 11 and 12) while maintaining good reactivity.

Based on the solvent screen data, we hypothesized that the aggregation and coordination of the organolithium species in solution influences both reactivity and the stereochemical outcome (*t*-BuSF was fully soluble in all solvents at cryogenic temperatures). To this end, additives known to form chelates in solution were explored such as TMEDA (entry 14), HMPA (entries 15 and 16), DMPU (entry 17), and tetrabutylammonium counterions (entries 18 and 19). The complexing ability of TMEDA, HMPA and DMPU was thought to increase the nucleophilicity of PhLi at -78 °C in hopes of preserving stereochemical purity. Unfortunately, enantiomeric excess did not increase in the presence of additional chelating agents but decreased by 5% with TMEDA and to a lesser extent with HMPA (2%) and DMPU (0.6%)—increasing the equivalents of HMPA from 1–10 eq. resulted in no observable product. The tetrabutylammonium counterions of TBAB and TBAI also resulted in a decrease in enantiomeric excess of 3% and 2% respectively.

Given that the additive chelates and counterions failed to improve the stereospecificity of the addition–elimination at sulfur, we turned to increasing the concentration of soluble Li<sup>+</sup> cations to facilitate weakening the S–F bond and act as a Lewis acid to improve the reactivity at sulfur under cryogenic temperatures. A surprising decrease in *t*-BuSF consumption was observed when 1 eq. of LiClO<sub>4</sub> (entry 20), albeit with nearly identical enantiopurity. Additionally, 2 eq. of LiClO<sub>4</sub> (entry 21) resulted in a 1.8% decrease of ee. It is important to note that a solution of LiClO<sub>4</sub> in Et<sub>2</sub>O was added to the PhLi at -78 °C prior to *t*-BuSF addition—the addition of an ethereal solution of LiClO<sub>4</sub> to *t*-BuSF at room temperature resulted in full decomposition prior to organolithium addition.

Due to the small decrease in enantiopurity from the starting sulfonylimidoyl fluoride (99.4% ee; 99.7:0.3 er) to the *tert*-butylphenyl sulfoximine product (98.3% ee; 99.15:0.85 er), we found it plausible that a trace impurity within the *t*-BuSF could contribute to the 0.55% increase of the undesired enantiomer during the reaction. It was found that the addition of NFSI to the PhLi solution at -78 °C prior to adding *t*-BuSF reduced the enantiopurity from 93.5% to 91.4% ee accompanied by the addition of phenyl sulfonamide (by-product of NFSI reacting with PhLi) to *t*-BuSF (observed by LC–MS). With careful analysis by HPLC and NMR, we determined the purity level has maintained ≥ 99% with routine storage (-20 °C, under argon)—lower grade *t*-BuSF (< 95% pure) has shown slightly lower yields (5–10% less) but **no** decrease in stereochemical purity of sulfoximine products. These results suggest that unreacted NFSI could lower the stereochemical purity of *tert*-butyl sulfoximine products and both should be removed via work-up and column chromatography prior to use.

Since no improvement to the stereochemical yield was achieved by changing solvents, temperatures, or including additives, a thorough investigation into the order of addition and rate of addition was implemented (entries 23–33). We found that the order of addition did not significantly impact the enantiopurity or yield, but we strongly suggest slow addition of *t*-BuSF to an organolithium (especially an organolithium that has not been

well studied). It appears that slow addition of *t*-BuSF (0.1 mL/min) is ideal and was used as a standard throughout this manuscript (*a syringe pump was only used for reaction optimization*). Interestingly, addition of PhLi to *t*-BuSF at -78 °C at a rate of 0.1 mL/min gave 97.6% ee while slower additions (0.05 to 0.01 mL/min) give >98% ee. The overall concentration of the reaction mixture did not appear to influence the stereochemical distribution of products, however, a concentration of at least 0.1 M is highly suggested.

The robustness of our –CON(*i*-Pr)<sub>2</sub> sulfonylimidoyl protecting group has been demonstrated against two urea analogs (*N,N*-dimethyl, entry 34; *N,N*-diethyl, entry 35) and the three commonly encountered protecting groups –Boc (entry 36), –Piv (entry 37) and –Bz (entry 38). Out of the three different functional groups (urea, carbamate, acyl), the urea-based groups provided the increased electron density and enough steric bulk (*N,N*-diisopropyl) to completely diminish the reactivity at the carbonyl center of the protecting group. The discovery of *N,N*-diisopropyl sulfonylimidoyl urea groups has enabled the first functionalization of *t*-BuSF, giving rise to stable and diversifiable S(VI) and S(IV) intermediates to be further functionalized. ***During the course of this optimization, unreacted t-BuSF was analyzed (not for every entry) and was determined to be >99% ee in every case.***

### IIIb. General procedures for the first S-functionalization of *t*-BuSF.

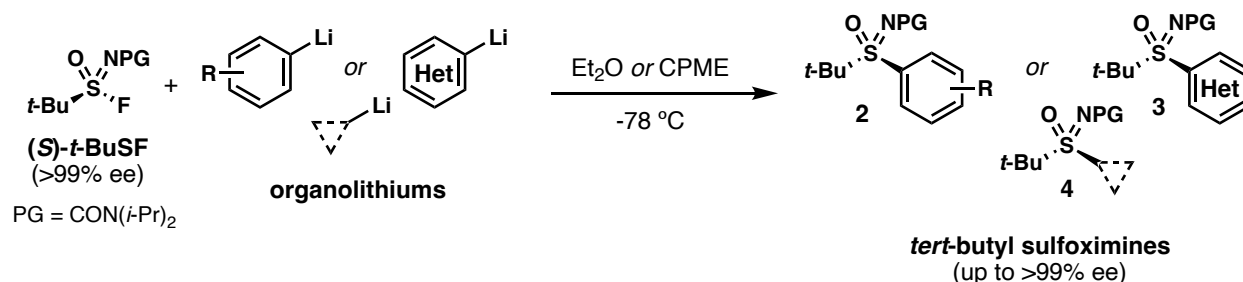

**Scheme S4:** General scheme for the synthesis of *tert*-butyl sulfoximines from *t*-BuSF and organolithium reagents.

During the course of this study, we have found that sulfonylimidoyl transfer of *t*-BuSF is compatible with a wide range of organolithiums including aryl, heteroaryl and alkyl examples with good to high yields and excellent stereochemical purity. Although many alkyl organolithiums provide the desired sulfoximine in high yields and enantiomeric excess (ee), the subsequent functionalization at sulfur results in an undesirable decrease in percent ee, thus we focused on aryl and heteroaryl sulfonylimidoyl transfers for the first functionalization using *t*-BuSF followed by functionalization with aliphatic nucleophiles (Grignards and turbo-Grignards). Sulfoximines bearing two aliphatic substitutions and alkyl sulfonylimidamides can be prepared using this method, however, a thorough investigation of the stereochemical purity of these products was not conducted and we cannot guarantee favorable stereochemical outcomes.

### IIIb-1. General procedure 1 (GP-1): Stepwise addition.

All reactions were performed on a 0.25 mmol scale unless otherwise stated with a final reaction volume of 0.1 M in Et<sub>2</sub>O or CPME.

To a 10 mL flame dried round-bottom flask equipped with magnetic stir bar and argon balloon was added aryl bromide (0.375 mmol, 1.5 eq.) followed by anhydrous Et<sub>2</sub>O (2 mL) then cooled to -78 °C. *n*-BuLi (0.375 mmol, 1.5 eq., 2.5 M in hexane) was added dropwise and stirred for 1 hour (lithium-halogen exchange) then ***t*-BuSF** (66.5 mg, 0.25 mmol, 1 eq.) in Et<sub>2</sub>O (0.5 mL) was added dropwise. The reaction mixture stirred at -78 °C for 1 hour (unless otherwise stated; *vide infra*). Upon completion (checked by TLC and LC-MS) MeOH (0.2 mL) and saturated aqueous NH<sub>4</sub>Cl (5 mL) were added to quench the reaction. The mixture was transferred to separatory funnel and extracted with EtOAc (5 mL x 3), then washed with water (10 mL x 3) and brine (10 mL x 3). Dried over anhydrous Na<sub>2</sub>SO<sub>4</sub>, filtered and concentrated under reduced pressure. Further purification was performed by silica gel column chromatography to give the desired *tert*-butyl sulfoximines.

#### Notes:

1. In some cases, lithium-halogen exchange was warmed up to -40–0 °C for 20 mins to achieve full exchange; see specific example for more details.
2. Dry ice/acetone bath can be used to maintain different temperatures by subsequent addition of dry-ice and monitored using a thermometer.
3. Excess organolithium nucleophile (1.5 eq.) was used unless otherwise stated in the specific example.
4. Full lithium-halogen exchange was not always observed and can be further optimized in a substrate specific manner to increase overall conversion and yield.
5. MeOH was used to quench the reaction efficiently to prevent immediate freezing when quenched with only saturated aqueous NH<sub>4</sub>Cl.
6. *n*-BuLi (2.5 M in hexanes) was purchased from Sigma-Aldrich and used without further titration. We recommend using 25 mL bottles that have not been open for more than 3 months with storage at -20 °C (unless titration in Et<sub>2</sub>O was performed before use).
7. All the *tert*-butyl sulfoximines prepared could be visualized by TLC using a PMA stain.
8. All racemic sulfoximines were prepared using the same method as the chiral examples.

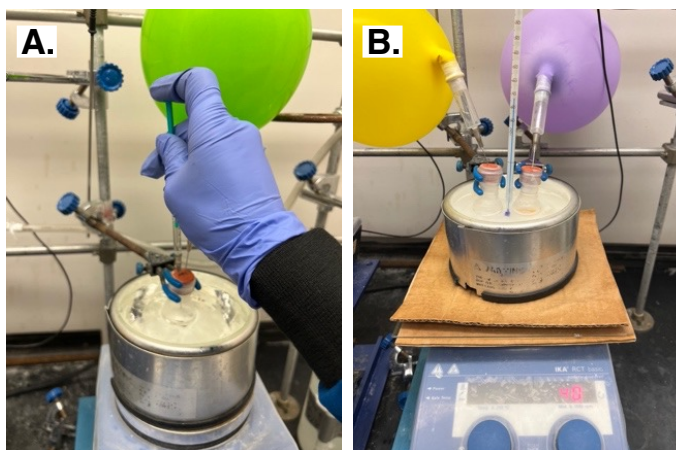

**Graphical Procedure 4:** General procedure (GP-1) for the synthesis of *tert*-butyl sulfoximines. **A.** Addition of *t*-BuSF to a pre-generated organolithium at -78 °C. **B.** Two reactions side-by-side after the addition of *t*-BuSF.

### IIIb-2. General procedure 2 (GP-2): One-pot lithiation/S(VI) transfer.

*All reactions were performed on a 0.25 mmol scale unless otherwise stated with a final reaction volume of 0.1 M in Et<sub>2</sub>O or CPME.*

To a 10 mL flame dried round-bottom flask equipped with magnetic stir bar and argon balloon was added aryl/alkyl bromide (0.375 mmol, 1.5 eq.) followed by ***t*-BuSF** (66.5 mg, 0.25 mmol, 1 eq.) and anhydrous Et<sub>2</sub>O (2.5 mL). Cooled to -78 °C and *t*-BuLi (0.22 mL, 1.7 M in pentane, 1.5 eq.) was added dropwise. The reaction mixture was stirred at -78 °C for 1 hour (some substrates required longer Li–X exchange times; *vide infra*). Upon completion (checked by TLC and LC–MS) MeOH (0.2 mL) and saturated aqueous NH<sub>4</sub>Cl (5 mL) were added to quench the reaction. The mixture was transferred to separatory funnel and extracted with EtOAc (5 mL x 3), then washed with water (10 mL x 3) and brine (10 mL x 3). Dried over anhydrous Na<sub>2</sub>SO<sub>4</sub>, filtered and concentrated under reduced pressure. Further purification was performed by silica gel column chromatography to give the desired *tert*-butyl sulfoximines.

#### Notes:

1. *t*-BuLi (1.7 M in pentane) was purchased from Sigma-Aldrich and used without further titration. We recommend using 25 mL bottles that have with uncompromised septa and have been stored at -20 °C (unless titration in Et<sub>2</sub>O was performed before use).
2. Dry ice-acetone bath can be used to maintain different temperatures by subsequent addition of dry-ice and monitored using a thermometer.
3. Longer reaction times and elevated temperatures were required (prior to ***t*-BuSF** addition) for some substrates to provide satisfactory lithium–halogen exchange and overall conversions (*vide infra*).
4. GP-1 was used for most substrates. GP-2 was spot checked with various examples without notable diminished yields and conversion.

5. We recommend using GP-1 as the initial lithiation method; however, some substrates are more compatible with *t*-BuLi and either a stepwise (GP-1 with *t*-BuLi) or premixed (GP-2) should be compatible.
6. The nucleophilic addition of *t*-BuLi to *t*-BuSF (di-*tert*-butyl sulfoximine) occurs at elevated temperatures (around -10 °C) and did not significantly interfere with the lithium–halogen exchange within the reaction scope.
7. If a substrate is known to undergo lithium–halogen exchange with *t*-BuLi at temperatures higher than -20 °C, we recommend using the stepwise method with *t*-BuLi (GP-1).
8. For some cases (noted below), 2 eq. of *t*-BuLi with respect to the organohalide was required to obtain efficient Li-X exchange.
9. Use of *n*-BuLi instead of *t*-BuLi for this procedure does not provide sufficient lithium–halogen exchange over *n*-butyl addition to ***t*-BuSF**, in which case *tert*-butyl(*n*-butyl) sulfoximine is observed.
10. All racemic sulfoximines were prepared using the same method as the chiral examples.

### IIIb-3. General procedure 3 (GP-3): Lithiation of (hetero)aryl halides and more challenging substrates.

*All reactions were performed on a 0.25 mmol scale unless otherwise stated with a final reaction volume of 0.1 M in Et<sub>2</sub>O or CPME.*

To a flame dried round-bottom flask equipped with magnetic stir bar under argon was added (hetero)aryl halide (0.375 mmol, 1.5 eq.) followed by Et<sub>2</sub>O (2.0 mL) then cooled to -78 °C. *n*-BuLi (0.150 mL, 0.375 mmol, 2.5 M in hexane, 1.5 eq.) was added dropwise and stirred at -78 °C for 30 minutes then warmed to -20–0 °C gradually and stirred for another 30 minutes then cooled to -78 °C. A solution of ***t*-BuSF** (0.25 mmol, 1 eq.) in Et<sub>2</sub>O (0.5 mL) was added dropwise. The reaction mixture was stirred at -78 °C for 1 hour (or warmed to the temperature noted below). Upon completion (checked by TLC and LC–MS) MeOH (0.2 mL) and saturated aqueous NH<sub>4</sub>Cl (5 mL) were added to quench the reaction. The mixture was transferred to separatory funnel and extracted with EtOAc (5 mL x 3), then washed with water (10 mL x 3) and brine (10 mL x 3). Dried over anhydrous Na<sub>2</sub>SO<sub>4</sub>, filtered and concentrated under reduced pressure. Further purification was performed by silica gel column chromatography to give the desired *tert*-butyl sulfoximines.

#### Notes:

1. Most organolithiums were stable at 0 °C during the preparation period.
2. This procedure was used to deprotonate heterocycles such as thiophenes and thiazoles.
3. Some substrates require higher temperatures (>0 °C) for Li-X—they are noted specifically in the substrate characterization section.
4. Dry ice-acetone bath can be used to maintain different temperature by subsequent addition of dry-ice and monitored using a thermometer.

5. The successful preparation of organolithiums is crucial for reaction with ***t*-BuSF**. Lithium–halogen exchange is substrate dependent and can be checked by LC–MS and/or TLC to determine the progress of the exchange. Full exchange was not always observed and can be further optimized to increase overall conversion and yield.
6. All racemic sulfoximines were prepared using the same method as the chiral examples.

#### IV. S-Activation of *tert*-butyl sulfoximines for further functionalization.

##### IVa. Reaction optimization: Reductive de-*tert*-butylation of sulfoximines

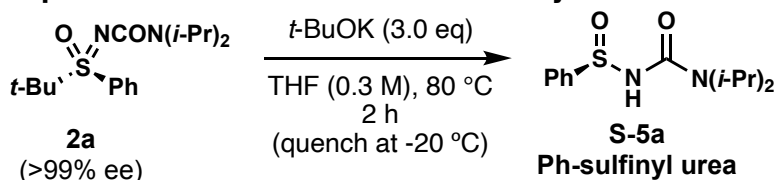

| Entry | Variations                                                                             | Enantiopurity (% ee) | Yield (%) <sup>a</sup> |
|-------|----------------------------------------------------------------------------------------|----------------------|------------------------|
| 1     | None                                                                                   | >99                  | 88                     |
| 2     | 4 h                                                                                    | >99                  | 87                     |
| 3     | 8 h                                                                                    | >99                  | 88                     |
| 4     | dioxane                                                                                | >99                  | 60                     |
| 5     | DMF                                                                                    | 91                   | 75                     |
| 6     | quench at 0 °C                                                                         | 97                   | 84                     |
| 7     | quench at rt                                                                           | 93                   | 83                     |
| 8     | TFA (0.2–1.5 eq.),<br>DCM (0.25 M), rt                                                 | NA                   | decomposed             |
| 9     | 4.0 M HCl in Dioxane (5–20 eq.)<br>DCM (0.2 M), -78 to 0 °C                            | NA                   | decomposed             |
| 10    | BF <sub>3</sub> •OEt <sub>2</sub> (1.0 eq.),<br>THF (0.1 M), 0 to 50 °C <sup>b</sup>   | NA                   | decomposed             |
| 11    | Mg(ClO <sub>4</sub> ) <sub>2</sub> (1.0 eq.),<br>THF (0.2 M), rt to 80 °C <sup>b</sup> | NA                   | NR                     |
| 12    | BH <sub>3</sub> (2.0 eq.), THF (0.2 M), rt                                             | NA                   | NR                     |
| 13    | Selectfluor (2.0 eq.), MeCN (0.1 M)<br>rt to 50 °C, 48 h                               | NA                   | (< 20%) <sup>c</sup>   |

**Table S3:** Optimization of a reductive de-*tert*-butylation of *N,N*-diisopropyl urea protected chiral *tert*-butyl sulfoximines to sulfinyl ureas. All reactions were performed on a 0.3 mmol scale in a flame dried flask under argon with anhydrous solvents. Enantiopurity was determined by chiral HPLC. Reactions were quenched with solvated (THF/DCM) silica gel. <sup>a</sup>Isolated yield.

<sup>b</sup>Decomposed upon heating. <sup>c</sup>Relative yield based on LC–MS. NA = not available. NR = no reaction.

The reduction of various N-substituted *tert*-butyl sulfoximines to sulfenamides by de-*tert*-butylation has been previously described in the literature for N-alkyl and N-acyl sulfoximines.<sup>2-6</sup> Known reaction conditions were screened with enantiopure *tert*-butyl phenyl sulfoximine bearing the *N,N*-diisopropyl urea protecting group. We found one condition to be superior with the sulfonimidoyl urea protecting group (*t*-BuOK, THF, 80 °C; entries 1-3), providing clean (quantitative by LC–MS analysis) conversion to the desired sulfinyl urea in high isolated yield and excellent stereochemical purity (>99%). The choice of solvent proved critical for both yield and stereospecificity. When dioxane was used, longer reaction times were required with lower isolated yield while maintaining excellent enantiopurity (entry 4). DMF led to enantio-erosion (75% ee) when applied to our sulfonimidoyl ureas (entry 5).

We found that the quench and work-up conditions were directly related to enantiopurity of the sulfinyl urea product. Quenching the reaction mixture with a mild aqueous acid such as NH<sub>4</sub>Cl results in decomposition of target sulfinyl urea whereas quenching with diluted silica gel (wet with DCM and THF) or AcOH (2 1.5–2 eq.) in THF at -20 °C provides the desired enantiopure product after filtration through a silica gel plug. When the reactions are quenched at temperatures above -20 °C (entries 6 and 7), a decrease in enantiopurity is observed, *which we speculate is a result of the exotherm generated upon quenching excess t-BuOK in solution.*

Bronsted acids that have been reported to reduce *tert*-butyl sulfoximines such as TFA (entry 8) and HCl (entry 9) resulted in decomposition of either the sulfoximine or sulfenamide (the sulfinyl urea is not stable under strong acidic conditions). The strong Lewis acidity of BF<sub>3</sub> (entry 10) gave decomposition at elevated temperatures while no appreciable consumption was observed at room temperature. In addition, no reaction was observed when Mg(ClO<sub>4</sub>)<sub>2</sub> was heated in THF at 80 °C (entry 11). Reductive conditions using BH<sub>3</sub> were ineffective regardless of the source of BH<sub>3</sub> used (commercial solutions or generated *in situ* from NaBH<sub>4</sub>/I<sub>2</sub>). Interestingly, upon treatment with Selectfluor in MeCN (entry 13), the sulfinyl urea can be observed by LC–MS along with decomposition side-products. Attempts to optimization the Selectfluor condition were unsuccessful with respect to the sulfinyl urea—further investigation toward a one-pot de-*tert*-butylation/fluorination method is discussed in a later section.

#### IVb. General procedure 4 (GP-4): reductive de-*tert*-butylation of sulfoximines to sulfinyl urea using *t*-BuOK.

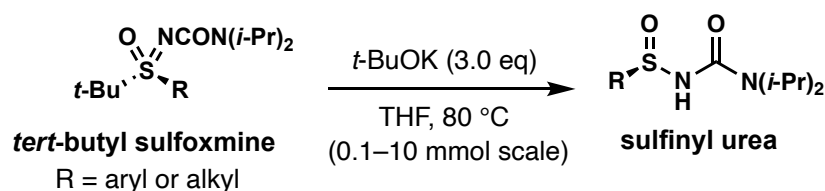

**Scheme S5:** General reaction condition for the reductive de-*tert*-butylation of *N,N*-diisopropyl urea protected chiral *tert*-butyl sulfoximines to sulfinyl ureas.

In a septum capped flame dried round-bottom flask equipped with a stir bar and argon balloon was added *tert*-butyl sulfoximine (1 eq.) followed by THF (0.3 M). Solid *t*-BuOK (3 eq.) was added, and the reaction stirred at room temperature for 2-5 minutes. The argon balloon was removed, and the reaction placed in a pre-heated oil bath set to 80 °C for 2 hours (behind a blast shield). Upon completion (checked by TLC) the reaction was cooled to -20 °C then quenched by adding a solution of AcOH (2 eq.) in THF (1-2 M) followed by silica gel (10:1, silica gel to starting material by mass) or by adding wet (THF and DCM) silica gel (20:1, silica gel to starting material by mass) with continual stirring at -20 °C for 2-5 minutes. The reaction mixture containing silica was filtered a plug of silica gel (wet with DCM) and rinsed with DCM. The filtrate was concentrated under reduced pressure via rotary evaporated with a water bath set to 25 °C to give the desired sulfinyl urea in 80-90% yields with high purity.

**Notes:**

1. Anhydrous THF was used. *t*-BuOK was purchased from Oakwood Chemical company and stored in a desiccator under argon. Pure AcOH was used, not an aqueous solution.
2. The argon balloon is removed to prevent evaporation of THF and contamination (from the solvent condensing in the balloon) during the reaction.
3. A blast shield is used as a safety precaution when heating any closed vessel higher than the solvent's boiling point.
4. The reactions were very clean with only the desired product detected by LC-MS (once full consumption was achieved).
5. Larger scale reactions (up to 10 mmol) provided >90% yields.
6. The reaction mixture can be adsorbed to silica gel and purified by column chromatography if desired. We found filtering through a plug of silica gel to be more convenient.
7. We avoided heating chiral sulfinamides under neutral or acidic conditions, regardless of the substitution at sulfur or nitrogen, due to their known stereochemical instability.
8. If a sulfonimidoyl fluoride is the desired synthetic target or intermediate, see the following sections for alternative methods.

#### IVc. Reaction optimization: Enantiospecific *S*-fluorination of sulfinyl ureas to sulfonimidoyl fluorides

| $  \begin{array}{ccc}  \begin{array}{c} \text{O} \\ \parallel \\ \text{Ph}-\text{S}-\text{N}-\text{C}(=\text{O})-\text{N}(\text{i-Pr})_2 \\   \\ \text{H} \\ \text{S-5a} \\ \text{Ph-sulfinyl urea} \\ (>99\% \text{ ee}) \end{array} & \xrightarrow[\text{THF (0.1 M), -20 }^\circ\text{C, 30 min}]{t\text{-BuOK (1.1 eq.), NFSI (1.0 eq.)}} & \begin{array}{c} \text{O} \quad \text{NCON}(\text{i-Pr})_2 \\ \parallel \quad / \\ \text{F}-\text{S}-\text{Ph} \\ \text{6a} \\ \text{Ph-sulfonimidoyl} \\ \text{fluoride} \end{array}  \end{array}  $ |                                                                        |                      |                        |
|-------------------------------------------------------------------------------------------------------------------------------------------------------------------------------------------------------------------------------------------------------------------------------------------------------------------------------------------------------------------------------------------------------------------------------------------------------------------------------------------------------------------------------------------------------|------------------------------------------------------------------------|----------------------|------------------------|
| Entry                                                                                                                                                                                                                                                                                                                                                                                                                                                                                                                                                 | Variations                                                             | Enantiopurity (% ee) | Yield (%) <sup>a</sup> |
| 1                                                                                                                                                                                                                                                                                                                                                                                                                                                                                                                                                     | None                                                                   | > 99                 | 91                     |
| 2                                                                                                                                                                                                                                                                                                                                                                                                                                                                                                                                                     | 0 °C, 5 min                                                            | 98                   | 60                     |
| 3                                                                                                                                                                                                                                                                                                                                                                                                                                                                                                                                                     | 0 °C, 30 min                                                           | 98                   | 93                     |
| 4                                                                                                                                                                                                                                                                                                                                                                                                                                                                                                                                                     | -78 °C, 2 h                                                            | > 99                 | 65                     |
| 5                                                                                                                                                                                                                                                                                                                                                                                                                                                                                                                                                     | DMF                                                                    | 96                   | 81                     |
| 6                                                                                                                                                                                                                                                                                                                                                                                                                                                                                                                                                     | NaH (1.5 eq.), 0 °C                                                    | 97                   | 90                     |
| 7                                                                                                                                                                                                                                                                                                                                                                                                                                                                                                                                                     | <b>NaH (1.5 eq.), -20 °C</b>                                           | <b>&gt; 99</b>       | <b>89</b>              |
| 8                                                                                                                                                                                                                                                                                                                                                                                                                                                                                                                                                     | EtOH (0.2 M), AcOK (2.0 eq.)<br>selectfluor(2.0 eq.), 0 °C to rt, 24 h | 97                   | 87                     |
| 9                                                                                                                                                                                                                                                                                                                                                                                                                                                                                                                                                     | DME, 0 °C, NaOH (1.5 eq.)                                              | 98                   | 83                     |

**Table S4:** Optimization of *S*-fluorination of chiral sulfinyl ureas to *N,N*-diisopropyl urea protected sulfonimidoyl fluorides. All reactions were performed on 0.3 mmol scale in a flame dried flask under argon. Enantiopurity was determined by using chiral HPLC. <sup>a</sup>Isolated yield.

The selective asymmetric *S*-fluorination of *N,N*-diisopropyl sulfinyl ureas to protected sulfonimidoyl fluorides is a key step to enable the *t*-BuSF reagent bifunctional. With enantiopure sulfinyl urea in hand, we determined two suitable conditions to achieve high yields and stereochemical preservation at sulfur (entries 1 and 7). The temperature used for *S*-fluorination influences stereochemical outcome. At 0 °C, excellent enantiopurity (97% to 98% ee) regardless of reaction time (entries 2 and 3) or the base used (entry 6). Decreasing the temperature to -78 °C provides >99% ee while reducing the reaction rate (entry 4). When the solvent was replaced with DMF (entry 5) both yield and enantiomeric excess dropped to 81% and 96% respectively.

The reported condition for *S*-fluorination of enantiopure *N*-Boc sulfinyl carbamates to sulfonimidoyl fluorides developed by Bull and Lücking<sup>7</sup> was found to give high yields (87%) with a reduction in enantiopurity (97% ee) when translated to our sulfinyl ureas (entry 8). Lastly, we employed the conditions used for Maruoka's *S*-alkylation of enantiopure *N*-Piv sulfinamides (entry 9),<sup>8</sup> which gave the desired sulfonimidoyl fluoride with slight erosion in enantiopurity (98% ee).

**IVd. General procedure 5 (GP-5): synthesis of *N,N*-diisopropyl urea protected chiral sulfonimidoyl fluorides from sulfinyl ureas.**

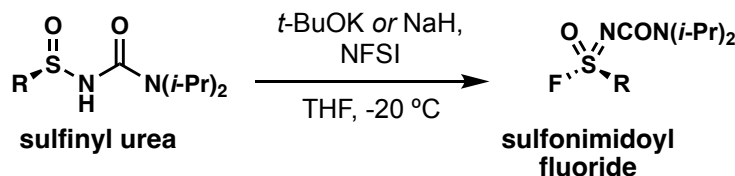

**Scheme S6:** General reaction conditions for the *S*-fluorination of chiral sulfinyl ureas to *N,N*-diisopropyl urea protected sulfonimidoyl fluorides.

In a septum capped flask or reaction vial equipped with a stir bar and argon balloon was added sulfinyl urea (1 eq.) and THF (0.1 M) then cooled to -20 °C. Either solid *t*-BuOK (1.1 eq.) or NaH (1.5 eq., 60% wt) was added (in one portion for small scale reactions, portion wise for >5 mmol scales) and the reaction stirred for 15 minutes at -20 °C. NFSI (1 eq.) was added in one portion and the reaction continued to stir for 30 minutes at -20 °C. Upon completion (checked by TLC) the reactions were quenched with saturated aqueous NH<sub>4</sub>Cl and extracted with EtOAc (x 3). Combined organic layers were washed with water and brine, dried over Na<sub>2</sub>SO<sub>4</sub>, filtered and concentrated. Further purification by silica gel column chromatography provided the desired sulfonimidoyl fluorides.

**Notes:**

1. Anhydrous solvent and reagents were used.
2. The choice of base did not affect the yield or enantiopurity on any scale up to 7 mmol (the largest performed).
3. Portion wise addition of base at larger scales was chosen to minimize the amount of heat generate from exotherms produced from deprotonation as well as vigorous hydrogen gas evolution when NaH was employed.
4. Quenching at temperatures higher than -20 °C did not affect yield or enantiopurity.
5. Although this method can provide high yields and enantiopurity, the stereogenic liability of sulfinamides (under neutral and acidic conditions) prompted an alternative method for sulfonimidoyl fluoride preparation.

#### IVe. Reaction optimization: Enantiospecific S-activation of *tert*-butyl sulfoximines to sulfonimidoyl fluorides.

$\text{t-Bu-S(=O)(Ph)-NCON}(i\text{-Pr})_2$  (2a)  $\xrightarrow[\text{then AcOH (2.0 eq.), NFSI (1.0 eq.)}]{\text{t-BuOK (3.0 eq.), THF (0.3 M), 80 }^\circ\text{C, 2 h}}$   $\text{F-S(=O)(Ph)-NCON}(i\text{-Pr})_2$  (S6a)

*tert*-butyl Ph-sulfoximine ( $>99\%$  ee)  $\rightarrow$  Ph-sulfonimidoyl fluoride

| Entry | Variations                                         | Enantiopurity (% ee) | Yield (%) <sup>a</sup> |
|-------|----------------------------------------------------|----------------------|------------------------|
| 1     | None                                               | $> 99$               | 81                     |
| 2     | None                                               | $> 99$               | 84 <sup>b</sup>        |
| 3     | None                                               | $> 99$               | 78 <sup>c</sup>        |
| 4     | 2.5 eq. AcOH                                       | $> 99$               | 73                     |
| 5     | 1.5 eq. AcOH                                       | $> 99$               | 75                     |
| 6     | 0°C instead of -20°C                               | 98                   | 80                     |
| 7     | no AcOH                                            | NA <sup>d</sup>      | ND <sup>e</sup>        |
| 8     | Selectfluor (2.2 eq.), MeCN (0.1 M)<br>50 °C, 48 h | 40                   | 62                     |

**Table S5:** Optimization of a one-pot transformation of chiral *N,N*-diisopropyl urea protected *tert*-butyl sulfoximines to sulfonimidoyl ureas. All reactions were performed on 0.3 mmol scale in a flame dried flask under argon. Enantiopurity was determined by using chiral HPLC. <sup>a</sup>Isolated yield. <sup>b</sup>reaction performed on 1.5 mmol scale (500 mg). <sup>c</sup>reaction performed on  $>3$  mmol scale ( $>1$  g). <sup>d</sup>Not available. <sup>e</sup>Not detected.

#### IVf. General procedure 6 (GP-6): enantiospecific de-*tert*-butylation/S-fluorination of *tert*-butyl sulfoximines to sulfonimidoyl fluorides

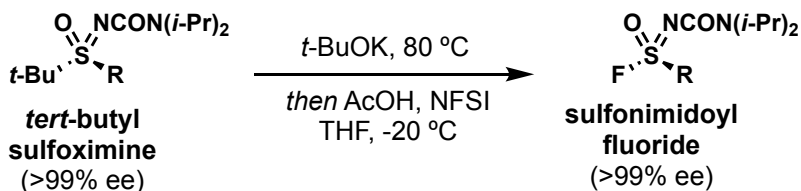

**Scheme S7:** General reaction condition for the one-pot transformation of chiral *N,N*-diisopropyl urea protected *tert*-butyl sulfoximines to sulfonimidoyl ureas.

To a flame dried round-bottom flask equipped with magnetic stir bar and argon balloon was added

*t*-Bu sulfoximine (1.0 eq) and anhydrous THF (0.3 M). Once dissolved, solid anhydrous *t*-BuOK (3.0 eq) was added, and the reaction stirred at room temperature for 2-5 minutes. The argon balloon was removed, and the reaction placed in a pre-heated oil bath set to 80 °C for 2 hours (behind a blast shield). After 2 h (or upon completion; checked by TLC),

the argon balloon was replaced then the reaction was cooled to -20°C with dry ice and acetone bath. AcOH (2.0 eq) dissolved in anhydrous THF was added slowly to dilute the reaction to 0.1 M. Solid NFSI (1.0 eq) was added in one portion, and the reaction stirred at -20°C for 30 mins. Upon completion (checked by TLC) the reaction was quenched with saturated aqueous NH<sub>4</sub>Cl solution at -20 °C and extracted with EtOAc (x 3). Combined organic layers were washed with water (x 3) and brine (x 3), dried over Na<sub>2</sub>SO<sub>4</sub>, filtered and concentrated under reduced pressure. Further purification was performed by silica gel column chromatography to provide the desired sulfonimidoyl fluoride.

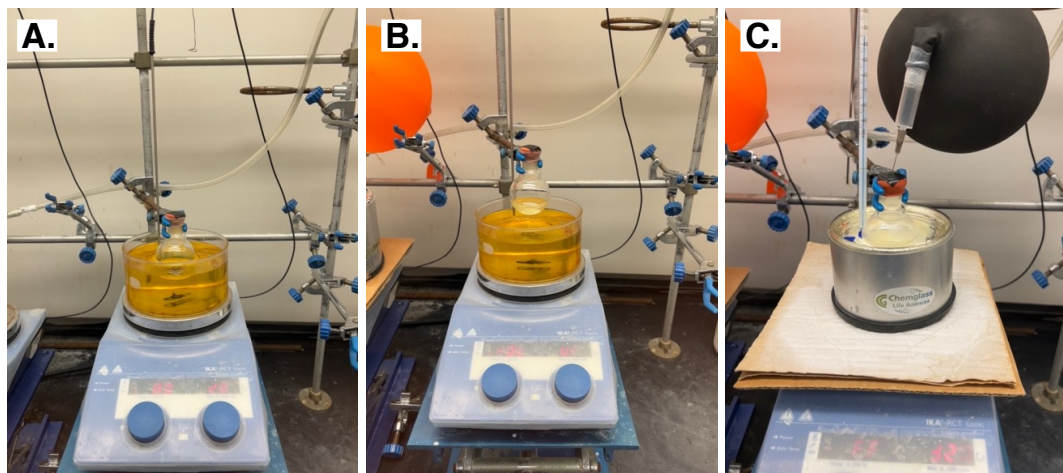

**Graphical set-up 1:** One-pot transformation of chiral *N,N*-diisopropyl urea protected *tert*-butyl sulfoximines to sulfinyl ureas. **A.** Reduction of *t*-butyl sulfoximines via de-*tert*-butylation using *t*-BuOK, heating at 80 °C in THF. **B.** Cooling to room temperature after 2 hours at 80 °C. **C.** Cooling to -20 °C and quenching with AcOH (2 eq.) followed by addition of NFSI (1 eq.).

#### Notes:

1. Anhydrous solvent and reagents were used.
2. Each step can be monitored by TLC (UV or PMA).
3. -20 °C or lower is crucial for maintaining enantiopurity.
4. AcOH was used to quench excess *t*-BuOK present in the reaction mixture prior to addition of NFSI. If not quenched, the desired product is only observed in trace amounts—*t*-BuOK reacts with NFSI prior to the sulfinamide *and/or* degrades the sulfonimidoyl fluoride formed.
5. The first step doesn't typically show significant color change; we usually observed a change from colorless to light-yellow.
6. A white precipitate is observed after the addition of NFSI and is an indication that the fluorination reaction is proceeding.

**V. Second S-functionalization: Enantiospecific synthesis of sulfoximines and sulfonimidamides from sulfonimidoyl fluorides.**

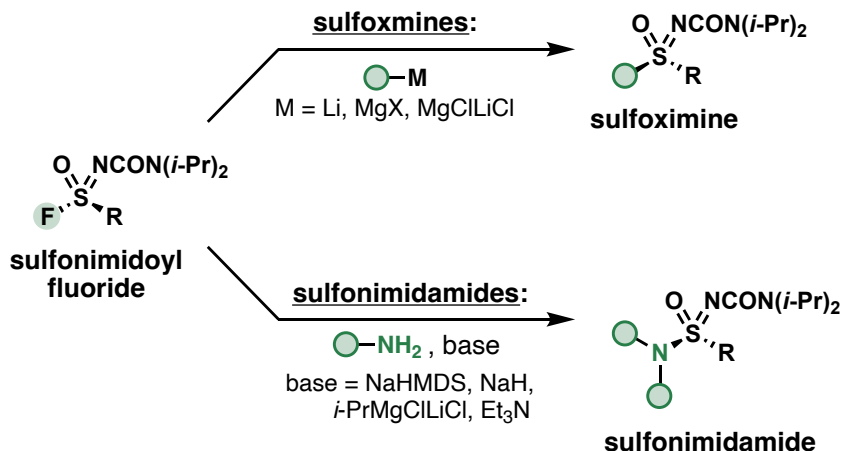

**Scheme S8:** Divergent synthesis of chiral sulfoximine and sulfonimidamides from *N,N*-diisopropyl urea protected sulfonimidoyl fluorides.

**Va. General procedure 7 (GP-7): Enantiospecific synthesis of sulfoximines from sulfonimidoyl fluorides using Grignard reagents.**

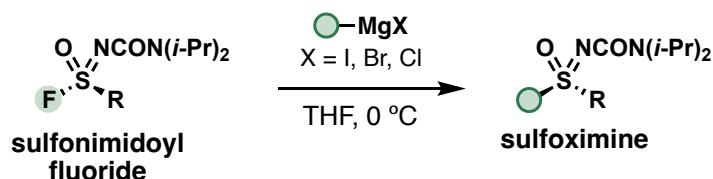

**Scheme S9:** General reaction conditions for the synthesis of chiral sulfoximine from *N,N*-diisopropyl urea protected sulfonimidoyl fluorides using Grignard reagents.

The Grignard reagents were used as purchased or prepared as follows:

In a 10 mL flame dried round-bottom flask equipped a stir bar and argon balloon was added Mg turnings (73 mg, 3 mmol, 1.5 eq.) and I<sub>2</sub> (approx. 5 mg, 0.02 mmol, 0.01 eq.) then vacuumed and refilled with argon. A portion of alkyl bromide or iodide (2 mmol, 1 eq.) solution in anhydrous THF (4 mL) was added with gentle heat until I<sub>2</sub> color disappeared, the rest of solution was then added dropwise.

After titration with iodine, the proper amount of the Grignard reagent (0.275 mmol, 1.1 eq.) was added dropwise to a solution of the sulfonimidoyl fluoride (0.25 mmol, 1.0 eq.) in THF (2.5 mL) in a separate 5 mL flame dried septum capped vial equipped a stir bar and argon balloon at 0 °C. The reaction was stirred at 0 °C for 30 minutes then warmed to room temperature (unless otherwise stated below). Upon completion (checked by TLC) the reaction was quenched with saturated aqueous NH<sub>4</sub>Cl (5 mL) then extracted with EtOAc (10 mL x 3). The combined organic layers were washed with water (5 mL x 3) then brine (5 mL x 3), dried over anhydrous MgSO<sub>4</sub>, filtered and concentrated under reduced



**Vc. General procedure 9 (GP-9): Enantiospecific synthesis of sulfonimidamides from sulfonimidoyl fluorides using Li/Na/KHMDS.**

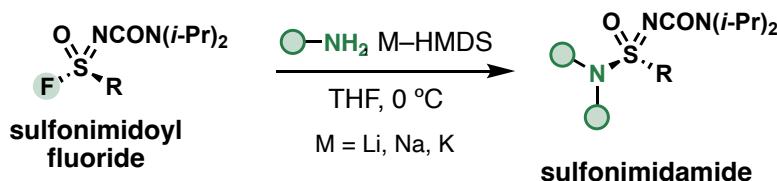

**Scheme S11:** General reaction conditions for the synthesis of chiral sulfonimidamides from *N,N*-diisopropyl urea protected sulfonimidoyl fluorides using Li/Na/K-HMDS as a base.

To a flame dried round-bottom flask equipped with magnetic stir bar and argon balloon, sulfonimidoyl fluoride (0.25 mmol, 1.0 eq.) and amine (1.0 eq.) were in anhydrous THF (0.1 M) at 0 °C. M-HMDS (2.0 eq.) was added dropwise to the stirring mixture at 0 °C. The reaction slowly warmed to room temperature where it stirred. Upon completion (checked by TLC) the reaction was quenched with silica gel then DCM was added, and solvent removed to adsorb the crude material to silica gel. Purification by column chromatography provided the desired sulfonimidamides.

**Notes:**

1. LiHMDS (1.0 M in THF), NaHMDS (2.0 M in THF) and KHMDS (0.7 M in toluene) were purchased from Acros Organics and used without titration. We found it important to use these bases within 6 months of the first use for optimal performance—older reagents provided decreased yields without affecting the enantiopurity of sulfonimidamide products.
2. We found that the counter ion ( $\text{Li}^+$ ,  $\text{Na}^+$ ,  $\text{K}^+$ ) did not affect the enantiopurity of sulfonimidamide products.
3. Reactions can be quenched with water, brine, or saturated aqueous  $\text{NH}_4\text{Cl}$  but should be worked up immediately.
4. No significant decrease in yield or enantiopurity was observed if the reactions stirred at room temperature overnight.
5. Although this method works for most amine substrates (aromatic 1°/2° and aliphatic 1°/2° amines) we typically used this method for aromatic amines.

**Vd. General procedure 10 (GP-10): Enantiospecific synthesis of sulfonimidamides from sulfonimidoyl fluorides using turbo-amides**

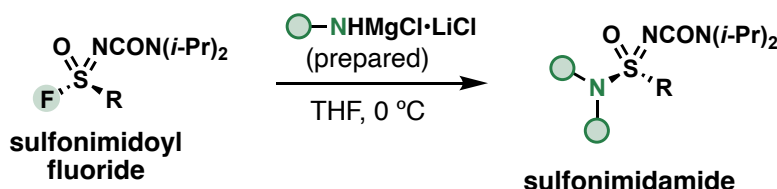

**Scheme S12:** General reaction conditions for the synthesis of chiral sulfonimidamides from *N,N*-diisopropyl urea protected sulfonimidoyl fluorides using turbo-amides.

For aliphatic amines: To a flame dried round-bottom flask equipped with magnetic stir bar and argon balloon was amine (2 eq. for 1° amines, 1 eq. for 2° amines) in anhydrous THF (0.1 M) at 0 °C. *i*-PrMgCl-LiCl (2 eq. for 1° amines, 1:1; 1 eq. for 2° amines, 1:1) was added dropwise under 0 °C. After 30 minutes of stirring, sulfonimidoyl fluoride (1.0 eq.) in THF (0.5 M) was added dropwise then warmed to room temperature. Upon completion (checked by TLC) the reaction was quenched with saturated aqueous NH<sub>4</sub>Cl then extracted with EtOAc (x 3). The combined organic layers were washed with water (x 3) then brine (x 3), dried over anhydrous MgSO<sub>4</sub>, filtered and concentrated under reduced pressure. Further purification by silica gel column chromatography provided the desired sulfonimidamides.

For ammonium chloride or bromide: To a flame dried round-bottom flask equipped with magnetic stir bar and argon balloon was charged with ammonium chloride or bromide (3.0 eq.) in anhydrous THF (0.1 M) at 0 °C. *i*-PrMgCl-LiCl (6.0 eq.) was added dropwise to the vigorously stirring mixture at 0 °C (cloudy mixture) then warmed to room temperature where the reaction mixture stirred until it became nearly clear (1 hour). The reaction mixture was cooled to 0 °C then sulfonimidoyl fluoride (1 eq.) in THF (0.5 M) was added dropwise and slowly warmed to room temperature. Upon completion (checked by TLC) the reaction was quenched with saturated aqueous NH<sub>4</sub>Cl then extracted with EtOAc (x 3). The combined organic layers were washed with water (x 3) then brine (x 3), dried over anhydrous MgSO<sub>4</sub>, filtered and concentrated under reduced pressure. Further purification by silica gel column chromatography provided the desired sulfonimidamides.

**Notes:**

1. *i*-PrMgCl-LiCl was purchased from Sigma-Aldrich and used without titration.
2. Two equivalents of 1° turbo-amide were required due to the acidity of the sulfonimidamide products (H-N). Full consumption of the sulfonimidoyl fluoride was not achieved if one equivalent of the turbo-amide was used. Use of additional bases (NaH, NaHMDS, Et<sub>3</sub>N) did not improve the reactions when one equivalent of turbo-amide was used.
3. Ammonium chloride or bromide reacted with turbo reagents generated gas. Releasing the gas would not affect the overall reaction. During the preparation of turbo amide, ammonium salt was slowly dissolved into the solution.

**Ve. General procedure 11 (GP-11): Enantiospecific synthesis of sulfonimidamides from sulfonimidoyl fluorides under thermal conditions**

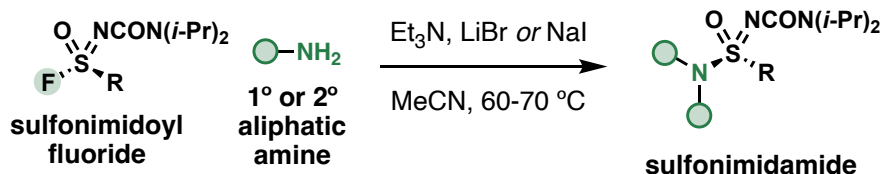

**Scheme S13:** General reaction conditions for the synthesis of chiral sulfonimidamides from *N,N*-diisopropyl urea protected sulfonimidoyl fluorides using Et<sub>3</sub>N as a base with LiBr or NaI organic soluble salts.

This reaction condition was adopted from the report by Bull and Luecking,<sup>7</sup> and slightly modified.

In a flame dried septum capped vial equipped with a stir bar and argon balloon was added sulfonimidoyl fluoride (1 eq.) followed by MeCN (0.3 M). The amine (1-1.5 eq.), LiBr (2 eq.) or NaI (2 eq.), and Et<sub>3</sub>N (2 eq.) were added. The argon balloon was removed, and the reaction was heated to 60-70 °C for the indicated reaction time (3-48 hours). Upon completion (checked by TLC and/or LC-MS) the solvent was removed under reduced pressure and the crude material was purified by silica gel column chromatography.

**Notes:**

1. Anhydrous solvent and reagents were found to be necessary to achieve full consumption of the sulfonimidoyl fluoride.
2. A less hygroscopic salt (NaI) was found to be performing equally as well to give good to high yields and excellent stereospecificity. In one instance (noted below) NaI provided the desired sulfonimidamide product in higher enantiopurity compared to LiBr (>99% ee vs. 98% ee).
3. If an amine salt form is used (e.g. HCl or citrate), an extra molar equivalent (with respect to the amine salt) of Et<sub>3</sub>N was required. Secondary amine salts provided cleaner reactions than primary amine salts.
4. The use of soluble salts such as LiBr and NaI was found to be crucial for the consumption of sulfonimidoyl fluorides. The enantiospecific was not determined without an additive salt.

**Vf. General procedure 12 (GP-12): Enantiospecific synthesis of sulfoximines and sulfonimidamides from *tert*-butyl sulfoximines**

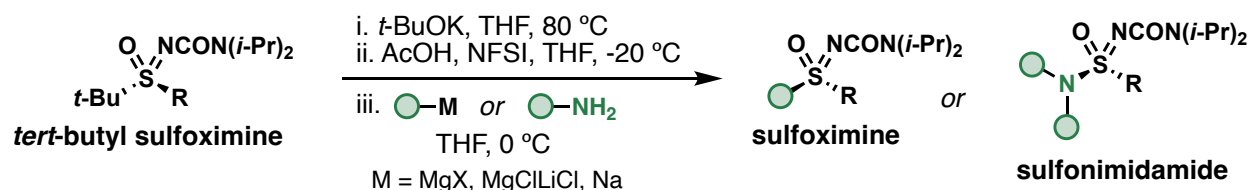

**Scheme S14:** General reaction conditions for a one-pot synthesis of chiral sulfoximine and sulfonimidamides from *N,N*-diisopropyl urea protected *tert*-sulfoximines.

To a flame dried round-bottom flask equipped with magnetic stir bar and argon balloon was added *tert*-butyl sulfoximine (1 eq.) followed by anhydrous THF (0.3 M). Once dissolved, solid anhydrous *t*-BuOK (3.0 eq) was added, and the reaction was stirred at room temperature for 2-5 minutes. The argon balloon was removed, and the reaction was placed in a pre-heated oil bath set to 80 °C for 2 hours (behind a blast shield). After 2 h (or upon completion; checked by TLC), the argon balloon was replaced then the reaction was cooled to -20 °C with dry ice and acetone bath. AcOH (2.0 eq) dissolved in anhydrous THF was added slowly to dilute the reaction to 0.1 M. Solid NFSI (1.0 eq) was added in one portion, and the reaction was stirred at -20 °C for 30 mins. Upon completion (checked by TLC) either the Grignard or amine nucleophile was added.

*Grignard nucleophiles:*

The Grignard reagent (2 eq.) was added dropwise to the reaction mixture and stirred for one hour at -20 °C (for certain case -78 °C was used instead, see substrate part for additional details). Upon completion (checked by TLC) the reaction was quenched with saturated aqueous NH<sub>4</sub>Cl solution then extracted with EtOAc (x 3). The combined organic layers were washed with water (x 3) then brine (x 3), dried over anhydrous Na<sub>2</sub>SO<sub>4</sub>, filtered and concentrated under reduced pressure. Further purification by silica gel column chromatography provided the desired sulfoximines.

*Amine nucleophiles:*

While the reaction was still at -20 °C from the fluorination step, the amine (1 eq.) and NaHMDS (2 eq.) were sequentially added to the reaction then slowly warmed to room temperature (2.0 eq turbo amide were used instead of 1.0 eq). Upon completion (checked by TLC) the reaction was quenched with silica gel then DCM was added, and solvent removed to adsorb the crude material to silica gel. Purification by column chromatography provided the desired sulfonimidamides.

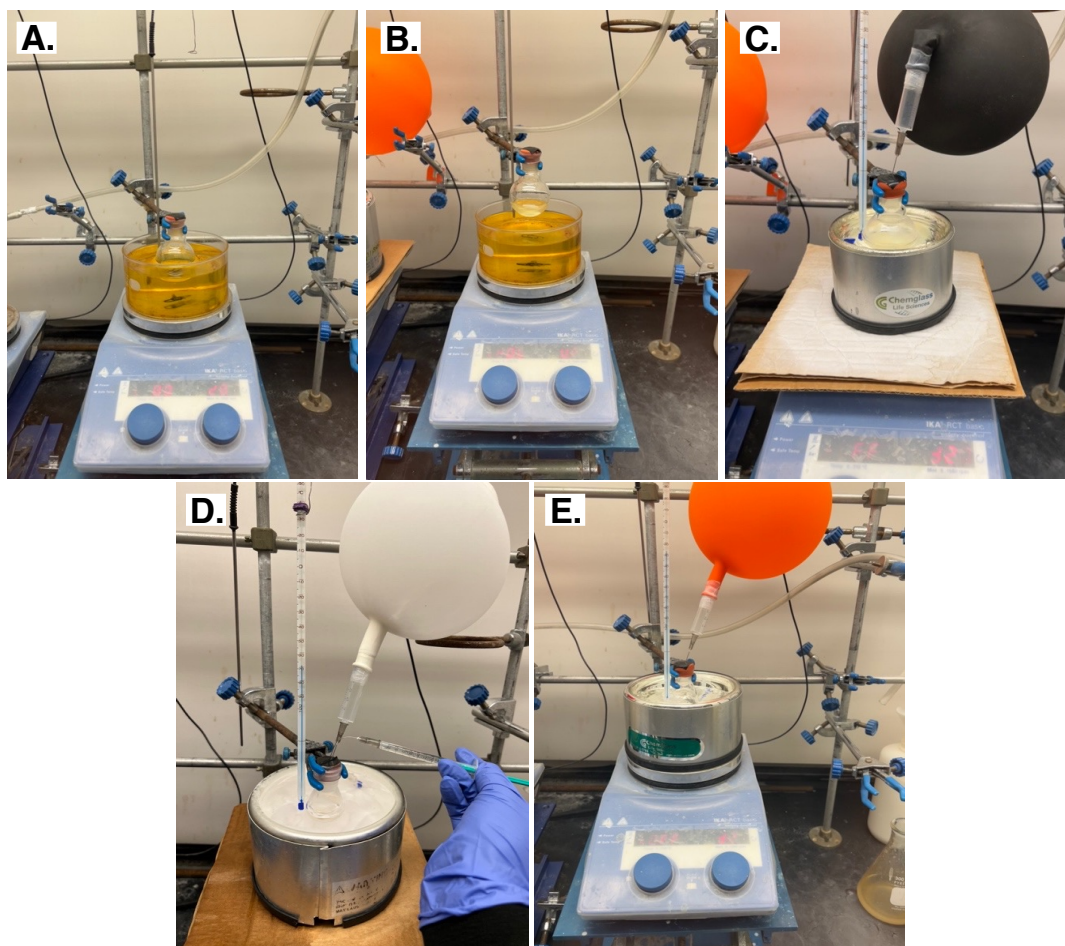

**Graphical Procedure 5:** One-pot transformation of chiral *tert*-butyl sulfoximines to sulfoximines or sulfonimidamides. **A.** Reduction of *tert*-butyl sulfoximines via de-*tert*-butylation using *t*-BuOK, heating at 80 °C in THF. **B.** Cooling to room temperature after 2 hours at 80 °C. **C.** Cooling to -20 °C and quenching with AcOH (2 eq.) followed by addition of NFSI (1 eq.). **D.** cooling to -78 °C then adding Grignard or turbo-Grignard reagent. **E.** While at -20 °C the desired turbo-amide or amine/NaHMDS was added then warmed to room temperature.

**Notes:**

1. Each step can be monitored by TLC (UV or PMA).
2. -20°C or lower is crucial for maintaining enantiopurity for the fluorination step and the addition of amines.
3. Two equivalents of the Grignard reagents were required due to the presence of *t*-BuOH in the reaction mixture (after quenching with AcOH). The use of a sacrificial Grignard was investigated but the reaction rate for the nucleophilic addition to sulfonimidoyl fluorides and deprotonation appeared to be very similar.
4. Amine nucleophiles can be deprotonated first and then added to the reaction in the form of amides without reduction of enantiopurity. The turbo amide was prepared from *i*-PrMgCl-LiCl and amine. And 2.0 eq turbo amide were added.

- Reactions can be quenched with water, brine, or saturated aqueous  $\text{NH}_4\text{Cl}$  but should be worked up immediately.
- We did not observe a reduction in enantiopurity using this one-pot transformation versus the stepwise synthesis.

## VI. Deprotection of *N,N*-diisopropyl urea protecting group from sulfoximines and sulfonimidamides

The development of a useful and practical sulfonimidoyl transfer reagent requires access to the free N–H derivatives that are more commonly investigated within the chemical sciences. We have demonstrated that the use of a sterically demanding urea-type sulfonimidoyl group enables synthesis of chiral sulfonimidoyl urea compounds in an expedient manner from a common bench stable reagent (*t*-BuSF). This section further demonstrates the unique features of the *N,N*-diisopropyl urea sulfonimidoyl group by its removal to N–H sulfoximines and sulfonimidamides under various reaction conditions, providing a new protecting group for the synthesis of sulfonimidoyl compounds.

### Vla. Reaction optimization: Deprotection of *N,N*-diisopropyl sulfonimidoyl ureas to N–H sulfoximines and sulfonimidamides

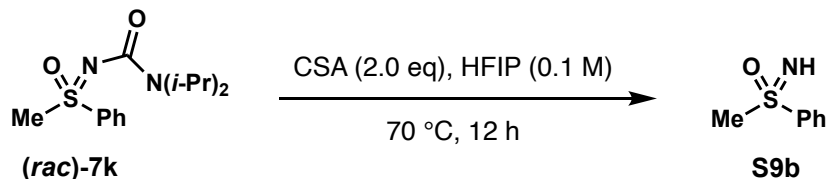

| Entry | Variations                                                                  | Conversion (%) <sup>a</sup> | Yield (%) <sup>b</sup> |
|-------|-----------------------------------------------------------------------------|-----------------------------|------------------------|
| 1     | None                                                                        | 100                         | 93                     |
| 2     | 60 °C, 36 h                                                                 | 100                         | 93                     |
| 3     | 4.0 M HCl (aq., 8.0 eq.):<br>AcOH= 1:1, 100 °C, 12 h                        | 100                         | 87                     |
| 4     | 4.0 M HCl (aq., 8.0 eq.):<br>Dioxane= 1:1, 100 °C, 12 h                     | 100                         | 87                     |
| 5     | PTSA (4.0 eq.), EtOH (0.1 M)<br>80 °C, 20 h                                 | < 5                         | NA <sup>c</sup>        |
| 6     | MsOH (4.0 eq.), EtOH (0.1 M)<br>80 °C, 20 h                                 | < 5                         | NA <sup>c</sup>        |
| 7     | TfOH (4.0 eq.), EtOH (0.1 M)<br>80 °C, 20 h                                 | < 5                         | NA <sup>c</sup>        |
| 8     | LiOH (1.0 M, aq, 3.0 eq.)<br>THF (0.1 M), 80 °C, 24 h                       | 0                           | NA <sup>c</sup>        |
| 9     | NH <sub>4</sub> OH (aq., 30% w/w, 3.0 eq.)<br>Dioxane (0.1 M), 100 °C, 24 h | 0                           | NA <sup>c</sup>        |

|    |                                                                                                                   |    |                 |
|----|-------------------------------------------------------------------------------------------------------------------|----|-----------------|
| 10 | LiAlH <sub>4</sub> (3.0 eq.), THF ( 0.1 M)<br>rt, 12 h                                                            | 64 | 57              |
| 11 | Sml <sub>2</sub> -H <sub>2</sub> O-LiBr (5:100:100 eq.)<br>THF (0.05 M), rt, 8 h                                  | 0  | NA <sup>c</sup> |
| 12 | Sml <sub>2</sub> -H <sub>2</sub> O-Et <sub>3</sub> N (6: 72: 72 eq.)<br>THF (0.05 M), rt, 8 h                     | 0  | NA <sup>c</sup> |
| 13 | NaH (3.0 eq.), ZnI <sub>2</sub> (1.0 eq.)<br>NaI (1.0 eq.), THF (0.2 M)<br>40 °C, 12 h                            | 0  | NA <sup>c</sup> |
| 14 | (Ir(COE) <sub>2</sub> Cl) <sub>2</sub> (5 %), Et <sub>2</sub> SiH <sub>2</sub> (4.0 eq.)<br>THF (0.3 M), rt, 24 h | 0  | NA <sup>c</sup> |
| 15 | 9-BBN ( 2.0 eq.), THF (0.1 M)<br>rt, 12 h                                                                         | 0  | NA <sup>c</sup> |
| 16 | Ti(O <i>i</i> Pr) <sub>4</sub> ( 1.0 eq.), PhSiH <sub>3</sub> (1.1 eq.)<br>THF (0.5 M), rt, 3 h                   | 0  | NA <sup>c</sup> |
| 17 | DMSO/H <sub>2</sub> O= 10: 1(0.1 M)<br>80 °C, 12 h <sup>d</sup>                                                   | 0  | NA <sup>c</sup> |

**Table S6:** Optimization for the cleavage of *N,N*-diisopropyl urea group from methyl phenyl sulfoximine. All reactions were performed on 0.1 mmol scale in a flame dried flask or vial under argon. <sup>a</sup>Determined by LC-MS. <sup>b</sup>Isolated yield. <sup>c</sup>Not available. <sup>d</sup>This condition works for secondary sulfonimidamides.

Our investigation to deprotect the *N,N*-diisopropyl urea group to give N–H sulfonimidoyl compounds used phenyl methyl sulfoximine as a model substrate (Table 5). Different hydrolysis conditions were evaluated including acidic (entries 1–7) and basic (entries 8 and 9) conditions. The optimal acidic conditions were found to be a combination of camphor sulfonic acid (CSA) in hexafluoroisopropyl alcohol (HFIP) at 60–70 °C (entries 1 and 2), removing the *N,N*-diisopropyl carbonyl group to give free N–H sulfoximine in excellent yield (93%). Other acidic conditions were also compatible but required harsher acidic and thermal conditions (entries 3 and 4) to give the desired deprotected sulfoximine in good yields. Stronger acids such as methane sulfonic acid (MsOH; entry 6) and triflic acid (TfOH; entry 7) were evaluated in ethanol under thermal conditions with little conversion to the desired product. The sulfonimidoyl urea group was stable under basic hydrolysis conditions with no conversion observed (entries 8 and 9).

Reductive conditions known to remove the N–Piv protecting group of sulfoximines was found to be compatible (entry 10) albeit in lower conversion and yield (heating to 60 °C increased the conversion to >90%, not shown). We further investigated methods reported to reduce secondary amides (entries 11–16) using a variety of conditions—all resulting in no conversion to the desired product.

We concurrently discovered that secondary sulfonimidamides (those containing an acidic proton H–N, *vide infra*) protected with the *N,N*-diisopropyl urea group were readily removed using CSA/HFIP and by heating in mixture of DMSO and water (10:1) at 80 °C

(entry 17), however, sulfoximines and tertiary sulfonimidamides are unable to be deprotected under such mild conditions.

A variety of deprotection conditions were found for either sulfoximines and/or sulfonimidamides to give the free N–H derivatives (entries 1–4, entry 10, entry 17). *The preferred general method to deprotect the N,N-diisopropyl urea groups from sulfoximines and sulfonimidamides the use of CSA in HFIP at 60–70 °C (Figure 15).* In the case of secondary sulfonimidamides, a milder condition (DMSO/H<sub>2</sub>O, heat) can be employed if desired which won't interfere with other protecting groups that may be sensitive to weak acids such as CSA. Other deprotection methods are currently being explored for other sulfonimidoyl groups.

**Vlb. General procedure 13 (GP-13): Deprotection of *N,N*-diisopropyl urea from sulfoximines and sulfonimidamide using CSA**

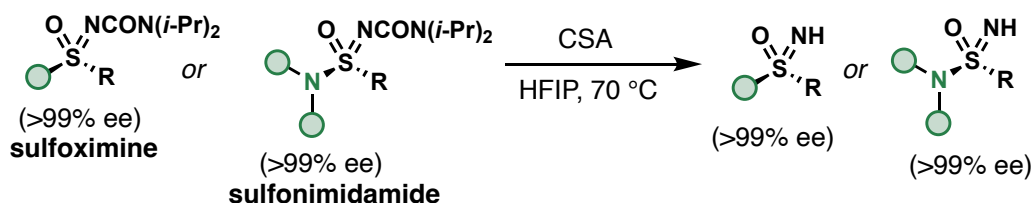

**Scheme S15:** General reaction conditions for the deprotection of *N,N*-diisopropyl urea protected sulfoximines and sulfonimidamides using CSA.

In a flask or vial equipped with a stir bar was added sulfoximine or sulfonimidamide (1 eq.) followed by CSA (2.0 eq) and HFIP (0.1 M). The reaction vessel was tightly capped then heated to 70 °C and stirred overnight (typically 12 h). Upon completion (checked by TLC) the reaction was cooled to room temperature then quenched with saturated aqueous NaHCO<sub>3</sub> to adjust the pH to neutral. The mixture was extracted with EtOAc (x 4), washed with brine and purified by column chromatography to give the desired deprotected sulfoximine or sulfonimidamides.

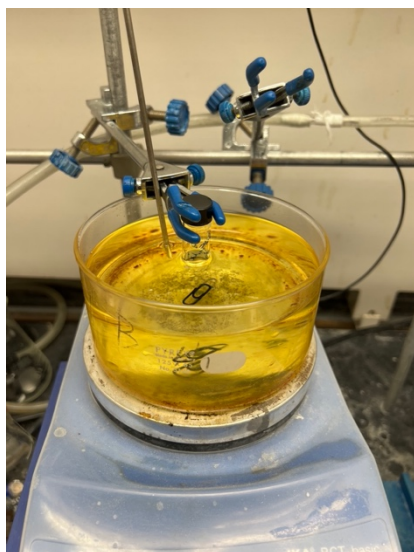

**Graphical set-up 2:** Deprotection of *N,N*-diisopropyl sulfonimidoyl ureas to N–H sulfonimidoyl groups using CSA in HFIP at 70 °C.

**Notes:**

1. Extraneous anhydrous conditions were not necessary for this reaction and did not affect the yield or enantiopurity of the products.
2. No erosion of enantiopurity was observed during the deprotection.
3. Lower temperatures (<70 °C) can be used with longer reaction times.

**Vlc. General procedure 14 (GP-14): Deprotection of *N,N*-diisopropyl urea from secondary sulfonimidamide using DMSO/H<sub>2</sub>O and heat**

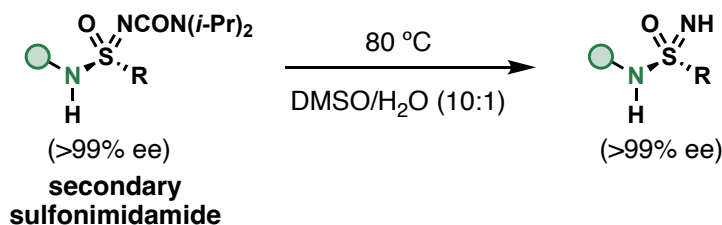

**Scheme S16:** General reaction conditions for the deprotection of *N,N*-diisopropyl urea protected secondary sulfonimidamides.

In a flask or vial equipped with a stir bar was added the primary sulfonimidamide (1 eq.) followed by DMSO/H<sub>2</sub>O (10:1, 0.1 M) then heated to 80 °C (typically 8 hours). Upon completion (checked by TLC) the reaction was cooled to room temperature, diluted with water, and extracted with EtOAc (x 4). The combined organic layers were washed with brine, dried over Na<sub>2</sub>SO<sub>4</sub>, filtered and concentrated. Further purification by silica gel column chromatography gave the desired deprotected products.

**Notes:**

1. This reaction condition works very well with secondary aromatic and aliphatic sulfonimidamides. No reaction occurs with tertiary sulfonimidamides and sulfoximines.
2. Aromatic secondary sulfonimidamides react faster than aliphatic derivatives.
3. Other water miscible solvents besides DMSO (MeCN and MeOH) produce the desired deprotected products but require longer reaction time. The enantiopurity of the deprotected products in other solvents was not determined.

**VII. Recrystallization of *tert*-butyl sulfoximines for further enantioenrichment****VIIa. General procedure 15 (GP-15): Recrystallization methods**

For the cases in which organolithium additions to *t*-BuSF do not give the desired enantiopurity, recrystallizations can be performed to further enhance the enantiopurity of *tert*-butyl sulfoximines. We have found that nearly all *N,N*-diisopropyl urea protected chiral *tert*-butyl sulfoximines prepared from *t*-BuSF are solids at room temperature and have the potential to further enhance enantiopurity if desired.

For example: *tert*-butyl phenyl sulfoximine was used as our model substrate to demonstrate the bifunctional property of the *t*-BuSF sulfonimidoyl transfer reagents. The addition of PhLi (commercial or *in situ* generated) to *t*-BuSF provides *tert*-butyl phenyl sulfoximine in 98% ee as a white solid which was enhanced to >99% ee via recrystallization.

The general procedure (GP-15) for typical recrystallizations is as follows: Pure *tert*-butyl sulfoximine was dissolved in a minimum amount of acetone, with the help of ultrasonic bath or heat. Hexanes (three times the volume of acetone used) was slowly added to prevent complete mixing of the two solvents. The mixture was transformed to -20 °C freezer to settle overnight to induce recrystallization. After 12 hours the recrystallized material was collected by filtration and washed with hexanes (x 3) to give 60–70% recovery yield and >99% ee after a single recrystallization. This process can be repeated two more times to give up to 90% recovery yield with >99% ee.

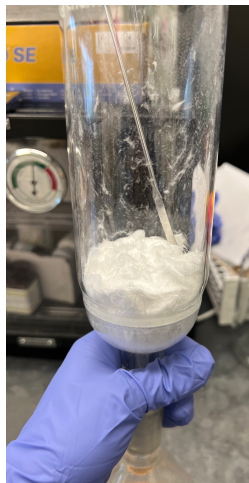

**Image 1:** Filtration of *tert*-butyl phenyl sulfoximine **2a** after first crop of recrystallization.

Other examples:

*tert*-butyl cyclopropyl sulfoximine (>90% recovery, 97 to >99% ee, three crops).

*tert*-butyl 4-chlorophenyl sulfoximine (>90% recovery, 95 to >99% ee; three crops).

**Notes:**

1. Acetone/hexanes solvent system worked for most recrystallizations. While for some cases, EtOAc/hexanes gave similar or better results—recrystallization is substrate-dependent.
2. General recovery yield was around 60–70% for all substrates.
3. The limit of recrystallization we observed was using an 80% ee mother liquor that gave roughly 60% recovery yield and >99% ee. A mother liquor lower than 80% ee became difficult to enhance further without seeding (using >99 % crystal).
4. Starting with 10 grams of *tert*-butyl phenyl sulfoximine, three rounds of recrystallization provided >90% recovery yield and >99% ee

## VIII. Verification of stereochemical assignment via X-ray crystallography

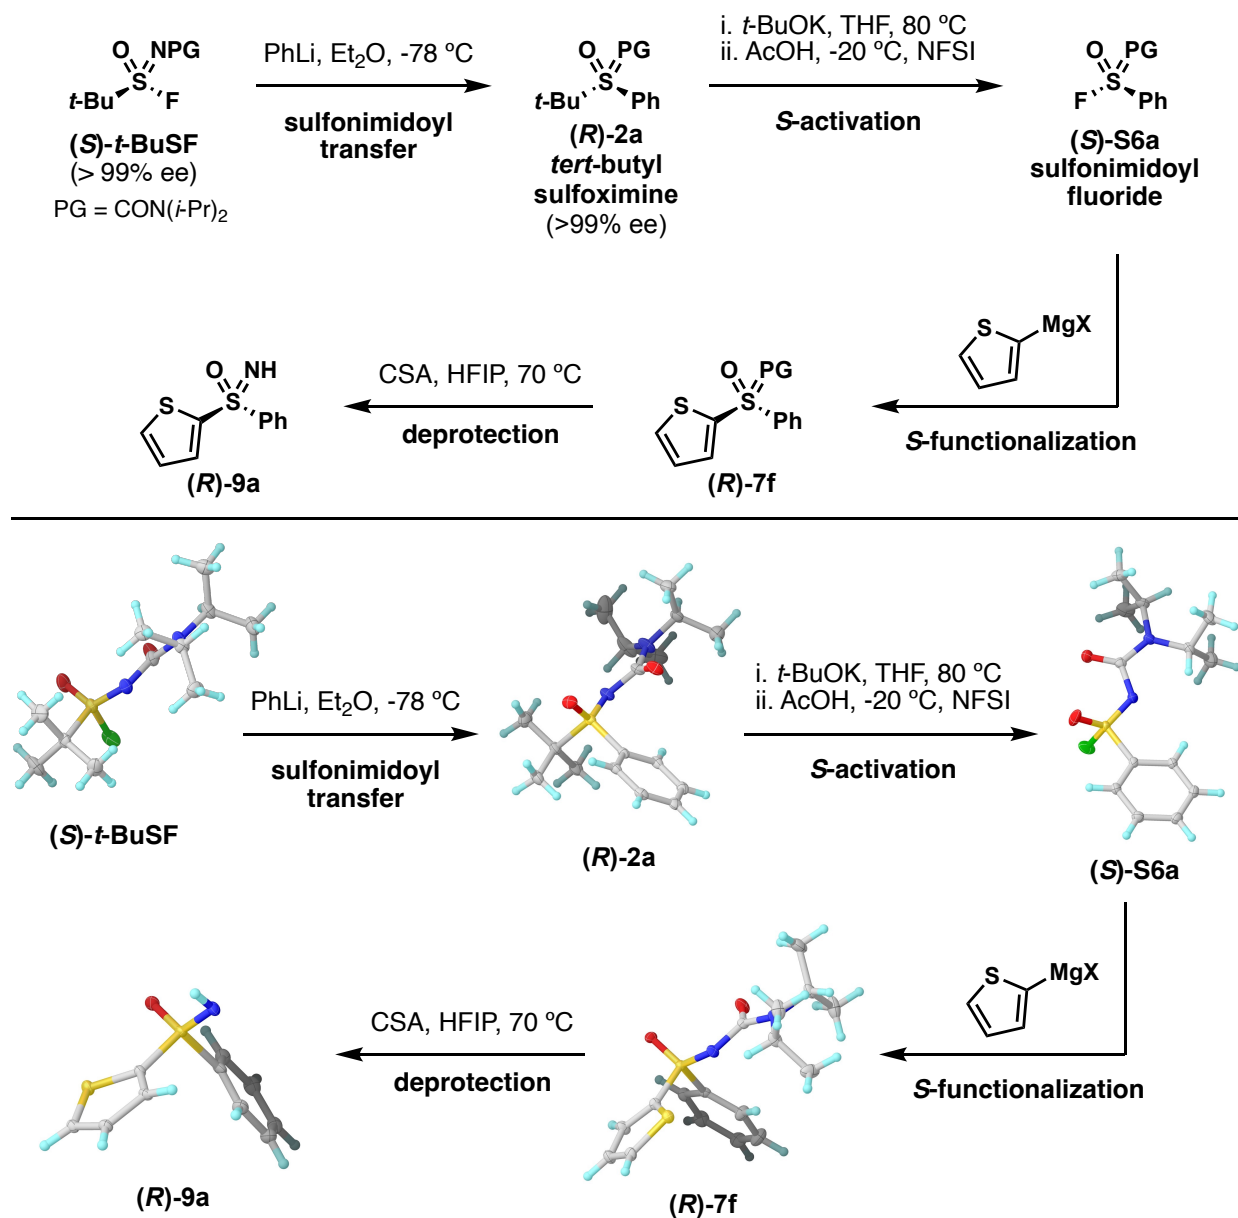

**Scheme S17:** Confirmation of stereogenic assignment for the synthesis of enantiopure sulfoximine **9** from *t*-BuSF by single crystal X-ray crystallography.

## IX. Compound characterization data.

### IXa. Sulfonimidoyl transfer scope and specific procedures.

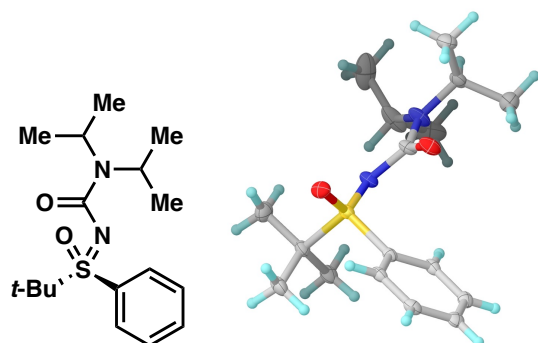

**2a**

GP-1 and GP-2 were used with commercially available bromobenzene (0.375 mmol, 1.5 eq.) with no further modifications. Purified by silica gel column chromatography using hexane/EtOAc (0% to 50% EtOAc gradient) to give the product (70 mg, 217  $\mu$ mol, 87% yield) as a white crystalline solid.

\*There were no significant differences in yield or enantiopurity between the two procedures. Phenyl lithium can be used instead of generating phenyl lithium from *n*-BuLi or *t*-BuLi with no decrease in yield or enantiopurity.

#### *Different scale reactions:*

GP-1 was followed with commercial PhLi (5.33 mL, 10.1 mmol, 1.9 M, dibutylether, 1.5 eq.) and *t*-BuSF (1.80 g, 6.76 mmol, 1 eq.), produced (1.77 g, 5.45 mmol, 81% yield, 98% ee).

GP-1 was followed with commercial PhLi (8.89 mL, 16.9 mmol, 1.9 M, dibutylether, 1.5 eq.) and *t*-BuSF (3.0 g, 16.9 mmol, 1 eq.), produced (3.30 g, 10.2 mmol, 90% yield, 98% ee).

**Physical characteristics:** White crystalline solid.

**TLC:**  $R_f$  = 0.27 (hexane/EtOAc, 50% EtOAc, UV).

**$^1\text{H}$  NMR:** (500 MHz,  $\text{CDCl}_3$ )  $\delta$  7.84 – 7.73 (m, 2H), 7.61 – 7.56 (m, 1H), 7.55 – 7.50 (m, 2H), 4.06 (s, 2H), 1.37 (s, 9H), 1.27 (d,  $J$  = 8.3 Hz, 12H) ppm.

**$^{13}\text{C}$  NMR:** (126 MHz,  $\text{CDCl}_3$ )  $\delta$  159.6, 135.2, 132.9, 130.2, 128.9, 60.8, 45.9, 23.8, 21.4 ppm.

**Specific rotation:**  $[\alpha]_D^{23} = +28.85$  (c 0.50,  $\text{CHCl}_3$ )

**HRMS:** Calc'd for  $\text{C}_{17}\text{H}_{29}\text{N}_2\text{O}_2\text{S}$   $[\text{M}+\text{H}^+]$  325.1944; found 325.1951.

**Melting Point:** 177-178  $^\circ\text{C}$

**Enantiomeric excess:** 98% ee. Recrystallized to >99% ee with >90% recovery.

**HPLC Conditions:** Daicel Chiralpak IC column, 70:30 *n*-hexane:*i*-PrOH, flow rate: 1 mL min<sup>-1</sup>, 25 °C, UV detection wavelength: 220 nm, retention time: major: 17.1 min, minor: 26.1 min.

**CCDC deposition Number:** 2243801

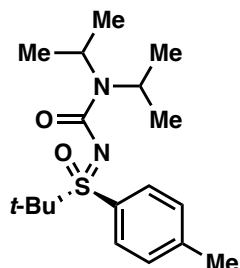

**2b**

GP-1 was followed with no additional modifications: Commercially available 4-bromotoluene (0.375 mmol, 1.5 eq.) was used. Purified by silica gel column chromatography using hexane/EtOAc (0% to 50% EtOAc gradient) to give the product (71 mg, 209 μmol, 84% yield) as a white amorphous solid.

GP-2 was also followed and showed no significant difference on yield or enantiopurity.

**Physical characteristics:** White amorphous solid.

**TLC:**  $R_f$  = 0.27 (hexane/EtOAc, 33% EtOAc).

**<sup>1</sup>H NMR:** (500 MHz, CDCl<sub>3</sub>) δ 7.67 (d, 2H), 7.33 (d, 2H), 4.12 (d,  $J$  = 31.4 Hz, 2H), 2.44 (s, 3H), 1.39 (s, 15H), 1.20 (d, 6H) ppm.

**<sup>13</sup>C NMR:** (126 MHz, CDCl<sub>3</sub>) δ 159.66, 143.65, 132.06, 130.21, 129.68, 60.67, 46.40, 45.17, 23.74, 21.86, 21.66, 20.88 ppm.

**Specific rotation:**  $[\alpha]_D^{23}$  = -9.12 (c 1.00, CHCl<sub>3</sub>)

**HRMS:** Calc'd for C<sub>18</sub>H<sub>31</sub>N<sub>2</sub>O<sub>2</sub>S [M+H<sup>+</sup>] 339.2101; found 339.2101.

**Enantiomeric excess:** 97% ee.

**HPLC Conditions:** Daicel Chiralpak IC column, 70:30 *n*-hexane:*i*-PrOH, flow rate: 1 mL min<sup>-1</sup>, 25 °C, UV detection wavelength: 220 nm, retention time: major: 27.5 min, minor: 36.6 min.

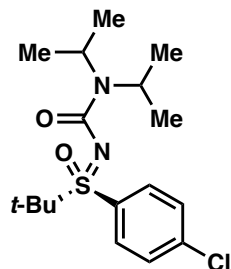

**2c**

GP-1 was followed with no additional modifications: Commercially available 1-bromo-4-chlorobenzene (0.375 mmol, 1.5 eq.) was used. Purified by silica gel column chromatography using hexane/EtOAc (0% to 50% EtOAc gradient) to give the product (75 mg, 208  $\mu$ mol, 85% yield) as a white crystalline solid.

GP-2 was also followed and showed no significant difference on yield or enantiopurity.

**Physical characteristics:** White crystalline solid.

**TLC:**  $R_f$  = 0.39 (hexane/EtOAc, 30% EtOAc, UV).

**$^1\text{H}$  NMR:** (500 MHz,  $\text{CDCl}_3$ )  $\delta$  7.70 (d,  $J$  = 8.6 Hz, 2H), 7.50 (d,  $J$  = 8.8 Hz, 2H), 4.06 (d, 2H), 1.37 (s, 21H) ppm.

**$^{13}\text{C}$  NMR:** (126 MHz,  $\text{CDCl}_3$ )  $\delta$  159.4, 139.7, 134.0, 131.6, 129.3, 60.9, 46.5, 45.4, 23.7, 21.9, 20.9 ppm.

**Specific rotation:**  $[\alpha]_D^{23} = -5.53$  (c 1.00,  $\text{CHCl}_3$ )

**HRMS:** Calc'd for  $\text{C}_{17}\text{H}_{28}\text{ClN}_2\text{O}_2\text{S}$   $[\text{M}+\text{H}^+]$  359.1555; found 359.1560.

**Melting Point:** 178-180  $^\circ\text{C}$

**Enantiomeric excess:** 96% ee.

**HPLC Conditions:** Daicel Chiralpak IC column, 70:30 *n*-hexane:*i*-PrOH, flow rate: 1 mL min $^{-1}$ , 25  $^\circ\text{C}$ , UV detection wavelength: 220 nm, retention time: major: 15.8 min, minor: 18.0 min.

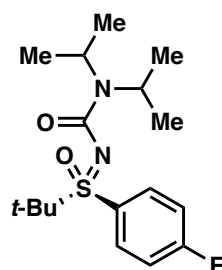

**2d**

GP-1 was followed with no additional modifications: Commercially available 1-bromo-4-fluorobenzene (0.375 mmol, 1.5 eq.) was used. Purified by silica gel column chromatography using hexane/EtOAc (0% to 40% EtOAc gradient) to give the product (71 mg, 207  $\mu$ mol, 83% yield) as a white amorphous solid.

**Physical characteristics:** White amorphous solid.

**TLC:**  $R_f$  = 0.4 (hexane/EtOAc, 30% EtOAc, UV).

**$^1\text{H}$  NMR:** (500 MHz,  $\text{CDCl}_3$ )  $\delta$  7.84 – 7.72 (m, 2H), 7.21 (dd,  $J$  = 9.1, 8.2 Hz, 2H), 4.05 (s, 2H), 1.37 (s, 9H), 1.34 – 1.18 (m, 12H) ppm.

**$^{13}\text{C}$  NMR:** (126 MHz,  $\text{CDCl}_3$ )  $\delta$  165.6 (d,  $J$  = 254.8 Hz), 159.4, 132.7 (d,  $J$  = 9.4 Hz), 131.1 (d,  $J$  = 3.2 Hz), 116.3 (d,  $J$  = 22.6 Hz), 60.9, 45.9, 23.7, 21.4 ppm.

**$^{19}\text{F}$  NMR:** (471 MHz,  $\text{CDCl}_3$ )  $\delta$  -105.86 ppm.

**Specific rotation:**  $[\alpha]_D^{23} = -15.24$  (c 1.00,  $\text{CHCl}_3$ )

**HRMS:** Calc'd for  $\text{C}_{17}\text{H}_{27}\text{FN}_2\text{NaO}_2\text{S}$   $[\text{M}+\text{Na}^+]$  365.1669; found 365.1666.

**Enantiomeric excess:** 97% ee.

**HPLC Conditions:** Daicel Chiralpak IC column, 70:30 *n*-hexane:*i*-PrOH, flow rate: 1 mL min<sup>-1</sup>, 25 °C, UV detection wavelength: 220 nm, retention time: minor: 13.7 min, major: 17.1 min.

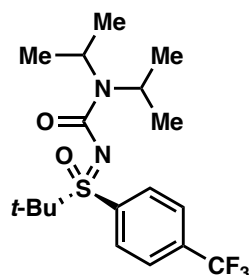

**2e**

GP-1 was followed with no additional modifications: Commercially available 1-bromo-4-(trifluoromethyl)benzene (0.375 mmol, 1.5 eq.) was used. Purified by silica gel column chromatography using hexane/EtOAc (0% to 40% EtOAc gradient) to give the product (71.6 mg, 183 μmol, 73% yield) as a white amorphous solid.

**Physical characteristics:** White amorphous solid.

**TLC:** R<sub>f</sub> = 0.27 (hexane/EtOAc, 25% EtOAc).

**<sup>1</sup>H NMR:** (500 MHz, CDCl<sub>3</sub>) δ 7.91 (d, 2H), 7.79 (d, 2H), 4.08 (d, 2H), 1.39 (s, 9H), 1.36 (s, 6H), 1.16 (dd, *J* = 23.0, 6.7 Hz, 6H) ppm.

**<sup>13</sup>C NMR:** (126 MHz, CDCl<sub>3</sub>) δ 159.3, 139.6, 134.6 (q, *J* = 32.8 Hz), 130.7, 126.04 (q, *J* = 3.7 Hz), 123.5 (q, *J* = 273.0 Hz), 61.0, 46.6, 45.5, 24.7, 23.7, 21.8, 20.9, 20.8 ppm.

**<sup>19</sup>F NMR:** (471 MHz, CDCl<sub>3</sub>) δ -63.07 ppm.

**Specific rotation:** [α]<sub>D</sub><sup>23</sup> = -8.76 (c 1.00, CHCl<sub>3</sub>)

**HRMS:** Calc'd for C<sub>18</sub>H<sub>28</sub>F<sub>3</sub>N<sub>2</sub>O<sub>2</sub>S [M+H<sup>+</sup>] 393.1818; found 393.1824.

**Enantiomeric excess:** 95% ee.

**HPLC Conditions:** Daicel Chiralpak IC column, 70:30 *n*-hexane:*i*-PrOH, flow rate: 1 mL min<sup>-1</sup>, 25 °C, UV detection wavelength: 220 nm, retention time: major: 8.3 min, minor: 9.4 min.

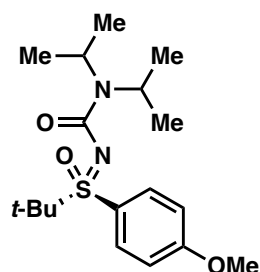

**2f**

GP-1 was followed with no additional modifications: Commercially available 4-bromoanisole (0.375 mmol, 1.5 eq.) was used. Purified by silica gel column chromatography using hexane/EtOAc (0% to 40% EtOAc gradient) to give the product (72.6 mg, 206  $\mu$ mol, 82% yield) as a white amorphous solid.

**Physical characteristics:** White amorphous solid.

**TLC:**  $R_f$  = 0.25 (hexane/EtOAc, 33% EtOAc).

**$^1\text{H}$  NMR:** (500 MHz,  $\text{CDCl}_3$ )  $\delta$  7.69 (d,  $J$  = 8.8 Hz, 2H), 6.99 (d,  $J$  = 9.1 Hz, 2H), 4.30 – 3.90 (m, 2H), 3.86 (s, 3H), 1.42 – 1.08 (m, 21H) ppm.

**$^{13}\text{C}$  NMR:** (126 MHz,  $\text{CDCl}_3$ )  $\delta$  163.3, 159.6, 132.1, 126.2, 114.4, 60.8, 55.7, 45.24, 23.7, 21.8, 21.1 ppm.

**Specific rotation:**  $[\alpha]_D^{23} = -1.51$  (c 1.00,  $\text{CHCl}_3$ )

**HRMS:** Calc'd for  $\text{C}_{18}\text{H}_{31}\text{N}_2\text{O}_3\text{S}$   $[\text{M}+\text{H}^+]$  355.2050; found 355.2051.

**Enantiomeric excess:** >99% ee.

**HPLC Conditions:** Daicel Chiralpak IC column, 70:30 *n*-hexane:*i*-PrOH, flow rate: 1 mL min<sup>-1</sup>, 25 °C, UV detection wavelength: 220 nm, retention time: major: 40.2 min, minor: 46.9 min.

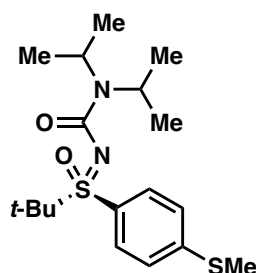

**2g**

GP-1 was followed with no additional modifications: Commercially available 4-bromothioanisole (0.375 mmol, 1.5 eq.) was used. Purified by silica gel column chromatography using hexane/EtOAc (0% to 50% EtOAc gradient) to give the product (69 mg, 187  $\mu$ mol, 75% yield) as a white amorphous solid.

**Physical characteristics:** White amorphous solid.

**TLC:**  $R_f$  = 0.19 (hexane/EtOAc, 33% EtOAc).

**$^1\text{H}$  NMR:** (500 MHz,  $\text{CDCl}_3$ )  $\delta$  7.64 (d,  $J$  = 8.6 Hz, 2H), 7.31 (d,  $J$  = 8.8 Hz, 2H), 4.06 (s, 2H), 2.51 (s, 3H), 1.37 (s, 9H), 1.25 (t,  $J$  = 8.0 Hz, 12H) ppm.

**$^{13}\text{C}$  NMR:** (126 MHz,  $\text{CDCl}_3$ )  $\delta$  159.5, 146.0, 130.8, 130.4, 125.4, 60.9, 46.0, 23.7, 21.3, 14.9 ppm.

**Specific rotation:**  $[\alpha]_D^{23} = +10.10$  (c 1.00,  $\text{CHCl}_3$ )

**HRMS:** Calc'd for  $\text{C}_{18}\text{H}_{31}\text{N}_2\text{O}_2\text{S}_2$   $[\text{M}+\text{H}^+]$  371.1821; found 371.1823.

**Enantiomeric excess:** 98% ee.

**HPLC Conditions:** Daicel Chiralpak IC column, 70:30 *n*-hexane:*i*-PrOH, flow rate: 1 mL min<sup>-1</sup>, 25 °C, UV detection wavelength: 220 nm, retention time: major: 40.5 min, minor: 45.5 min.

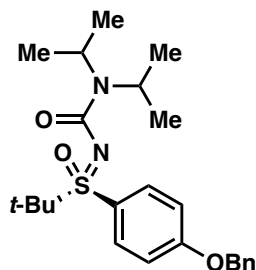

**2h**

GP-1 was followed with no additional modifications: Commercially available 1-(benzyloxy)-4-bromobenzene (0.375 mmol, 1.5 eq.) was used. Purified by silica gel column chromatography using hexane/EtOAc (0% to 40% EtOAc gradient) to give the product (43 mg, 102 μmol, 40% yield) as a white amorphous solid.

**Physical characteristics:** White amorphous

**TLC:**  $R_f$  = 0.25 (hexane/EtOAc, 30% EtOAc).

**<sup>1</sup>H NMR:** (500 MHz, CDCl<sub>3</sub>) δ 7.69 (d, *J* = 8.5 Hz, 2H), 7.44 – 7.32 (m, 5H), 7.10 – 7.03 (m, 2H), 5.13 – 5.05 (m, 2H), 4.07 (m, 2H), 1.42 – 1.27 (m, 15H), 1.25 – 1.09 (m, 6H) ppm.

**<sup>13</sup>C NMR:** (126 MHz, CDCl<sub>3</sub>) δ 162.6, 159.6, 136.1, 132.2, 128.9, 128.5, 127.8, 126.5, 115.1, 70.5, 60.8, 45.5, 23.8, 21.9, 20.9 ppm.

**Specific rotation:**  $[\alpha]_D^{23} = +47.35$  (c 0.50, CHCl<sub>3</sub>)

**HRMS:** Calc'd for C<sub>24</sub>H<sub>35</sub>N<sub>2</sub>O<sub>3</sub>S [M+H<sup>+</sup>] 431.2363; found 431.2359.

**Enantiomeric excess:** 97% ee.

**HPLC Conditions:** Daicel Chiralpak IC column, 70:30 *n*-hexane:*i*-PrOH, flow rate: 1 mL min<sup>-1</sup>, 25 °C, UV detection wavelength: 220 nm, retention time: major: 36.4 min, minor: 52.9 min.

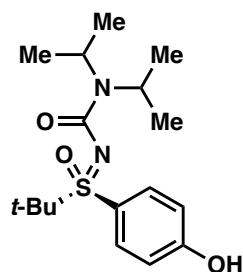

**2i**

GP-1 was followed with no additional modifications: Commercially available 4-bromophenol (or with -TBS protection) (0.375 mmol, 1.5 eq.) were used. Purified by silica gel column chromatography using DCM/MeOH (0% to 10% MeOH gradient) to give the product (63.9 mg, 188  $\mu$ mol, 75% yield) as a white amorphous solid.

*Note:* The OTBS protected phenol gave similar yield and exact enantiopurity. The silyl protecting group is removed during the reaction.

**Physical characteristics:** White amorphous solid.

**TLC:**  $R_f$  = 0.20 (DCM/MeOH, 10% MeOH).

**$^1\text{H}$  NMR:** (500 MHz,  $\text{CDCl}_3$ )  $\delta$  9.54 (s, 1H), 7.36 (d,  $J$  = 8.3 Hz, 2H), 6.66 – 6.59 (m, 2H), 4.12 (d,  $J$  = 121.9 Hz, 2H), 1.42 (d,  $J$  = 6.8 Hz, 6H), 1.33 (s, 9H), 1.21 (dd,  $J$  = 14.0, 6.8 Hz, 6H) ppm.

**$^{13}\text{C}$  NMR:** (126 MHz,  $\text{CDCl}_3$ )  $\delta$  162.3, 161.1, 131.8, 122.2, 116.5, 61.2, 46.2, 45.9, 23.6, 21.9, 21.7, 21.0, 20.9 ppm.

**Specific rotation:**  $[\alpha]_D^{23} = -66.29$  (c 1.00,  $\text{CHCl}_3$ )

**HRMS:** Calc'd for  $\text{C}_{17}\text{H}_{28}\text{N}_2\text{NaO}_3\text{S}$   $[\text{M}+\text{Na}^+]$  363.1713; found 363.1705.

**Enantiomeric excess:** 97% ee.

**HPLC Conditions:** (hydroxy group was methylated for HPLC analysis) Daicel Chiralpak IC column, 70:30 *n*-hexane:*i*-PrOH, flow rate: 1 mL min<sup>-1</sup>, 25 °C, UV detection wavelength: 220 nm, retention time: major: 36.5 min, minor: 43.7 min.

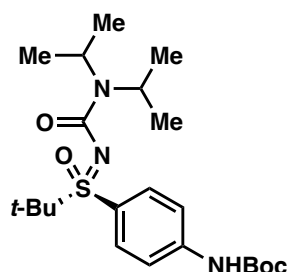

**2j**

GP-1 was followed with additional modifications mentioned below: Commercially available *tert*-butyl (4-bromophenyl) carbamate (0.375 mmol, 1.5 eq.) was used and equivalents of *n*-BuLi was increased (from 1.5 to 3 eq.). For halogen-Li exchange, the reaction was removed from bath for 15 min. Then cooled down to -78 °C and repeat the process with another 15 min to complete full exchange. The reaction was warmed to -40 °C after addition of ***t*-BuSF** where it stirred for one hour. Purified by silica gel column chromatography using hexane/Acetone (0% to 30% Acetone gradient) to give the product (65.9 mg, 150  $\mu$ mol, 60% yield) as a white amorphous solid.

**Physical characteristics:** White amorphous solid.

**TLC:**  $R_f$  = 0.35 (hexane/Acetone, 30% Acetone).

**$^1\text{H}$  NMR:** (500 MHz,  $\text{CDCl}_3$ )  $\delta$  7.64 (d, 2H), 7.50 (d, 2H), 6.95 (s, 1H), 4.02 (d, 2H), 1.52 (s, 9H), 1.35 (s, 15H), 1.19 (d, 6H) ppm.

**<sup>13</sup>C NMR:** (126 MHz, CDCl<sub>3</sub>) δ 159.6, 152.4, 143.1, 131.4, 127.9, 118.1, 81.4, 60.9, 46.6, 45.3, 28.4, 23.7, 21.8, 21.0 ppm.

**Specific rotation:**  $[\alpha]_D^{23} = -15.31$  (c 1.00, CHCl<sub>3</sub>)

**HRMS:** Calc'd for C<sub>22</sub>H<sub>38</sub>N<sub>3</sub>O<sub>4</sub>S [M+H<sup>+</sup>] 440.2578; found 440.2574.

**Enantiomeric excess:** >99% ee.

**HPLC Conditions:** Daicel Chiralpak IC column, 70:30 *n*-hexane:*i*-PrOH, flow rate: 1 mL min<sup>-1</sup>, 25 °C, UV detection wavelength: 220 nm, retention time: major: 9.7 min, minor: 13.4 min.

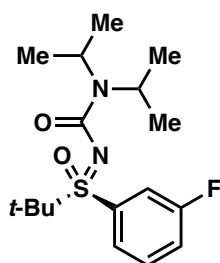

**2k**

GP-1 was followed with no additional modifications: Commercially available 1-bromo-3-fluorobenzene (0.375 mmol, 1.5 eq.) was used. Purified by silica gel column chromatography using hexane/EtOAc (0% to 40% EtOAc gradient) to give the product (70.1 mg, 205 μmol, 82% yield) as a white solid.

**Physical characteristics:** White amorphous solid.

**TLC:** R<sub>f</sub> = 0.25 (hexane/EtOAc, 30% EtOAc).

**<sup>1</sup>H NMR:** (500 MHz, CDCl<sub>3</sub>) δ 7.57 (dt, *J* = 7.8, 1.3 Hz, 1H), 7.54 – 7.47 (m, 2H), 7.29 (tdd, *J* = 8.2, 2.6, 1.1 Hz, 1H), 4.27 – 3.82 (m, 2H), 1.39 (s, 9H), 1.34 (s, 6H), 1.15 (d, 6H) ppm.

**<sup>13</sup>C NMR:** (126 MHz, CDCl<sub>3</sub>) δ 162.6 (d, *J* = 251.2 Hz), 159.3, 137.8 (d, *J* = 6.3 Hz), 130.5 (d, *J* = 7.6 Hz), 125.9 (d, *J* = 3.2 Hz), 120.2 (d, *J* = 21.2 Hz), 117.5 (d, *J* = 24.2 Hz), 61.0, 46.6, 45.4, 23.8, 21.8, 20.9, 20.8 ppm.

**<sup>19</sup>F NMR:** (471 MHz, CDCl<sub>3</sub>) δ -110.39 ppm.

**Specific rotation:**  $[\alpha]_D^{23} = -13.65$  (c 1.00, CHCl<sub>3</sub>)

**HRMS:** Calc'd for C<sub>17</sub>H<sub>28</sub>FN<sub>2</sub>O<sub>2</sub>S [M+H<sup>+</sup>] 343.1850; found 343.1853.

**Enantiomeric excess:** 95% ee.

**HPLC Conditions:** Daicel Chiralpak IC column, 70:30 *n*-hexane:*i*-PrOH, flow rate: 1 mL min<sup>-1</sup>, 25 °C, UV detection wavelength: 220 nm, retention time: major: 12.1 min, minor: 13.7 min.

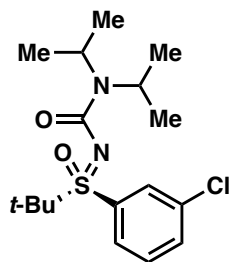

**2l**

GP-1 was followed with no additional modifications: Commercially available 1-bromo-3-chlorobenzene (0.375 mmol, 1.5 eq.) was used. Purified by silica gel column chromatography using hexane/EtOAc (0% to 40% EtOAc gradient) to give the product (74.3 mg, 207  $\mu$ mol, 83% yield) as a white amorphous solid.

**Physical characteristics:** White amorphous solid.

**TLC:**  $R_f$  = 0.30 (hexane/EtOAc, 30% EtOAc).

**$^1\text{H}$  NMR:** (500 MHz,  $\text{CDCl}_3$ )  $\delta$  7.76 (s, 1H), 7.64 (dt,  $J$  = 8.0, 1.3 Hz, 1H), 7.55 (ddd,  $J$  = 8.0, 2.1, 1.1 Hz, 1H), 7.47 (t,  $J$  = 7.9 Hz, 1H), 4.29 – 3.86 (m, 2H), 1.38 (s, 9H), 1.35 – 1.16 (m, 12H) ppm.

**$^{13}\text{C}$  NMR:** (126 MHz,  $\text{CDCl}_3$ )  $\delta$  159.3, 137.4, 135.3, 133.1, 130.2, 130.1, 128.3, 61.1, 46.7, 45.47, 23.8, 21.6, 20.9 ppm.

**Specific rotation:**  $[\alpha]_D^{23} = -7.86$  (c 1.00,  $\text{CHCl}_3$ )

**HRMS:** Calc'd for  $\text{C}_{17}\text{H}_{28}\text{ClN}_2\text{O}_2\text{S}$   $[\text{M}+\text{H}^+]$  359.1555; found 359.1560.

**Enantiomeric excess:** 97% ee.

**HPLC Conditions:** Daicel Chiralpak IC column, 70:30 *n*-hexane:*i*-PrOH, flow rate: 1 mL min<sup>-1</sup>, 25 °C, UV detection wavelength: 220 nm, retention time: major: 12.2 min, minor: 14.3 min.

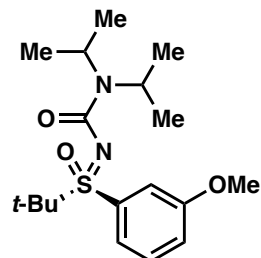

**2m**

GP-1 was followed with no additional modifications: Commercially available 3-bromoanisole (0.375 mmol, 1.5 eq.) was used. Purified by silica gel column chromatography using hexane/EtOAc (0% to 40% EtOAc gradient) to give the product (71.7 mg, 202  $\mu$ mol, 81% yield) as a white solid.

**Physical characteristics:** White amorphous solid.

**TLC:**  $R_f$  = 0.20 (hexane/EtOAc, 30% EtOAc).

**$^1\text{H}$  NMR:** (500 MHz,  $\text{CDCl}_3$ )  $\delta$  7.42 (t,  $J$  = 8.0 Hz, 1H), 7.36 – 7.30 (m, 2H), 7.11 (ddd,  $J$  = 8.2, 2.5, 1.0 Hz, 1H), 4.30 – 3.88 (m, 2H), 3.83 (s, 3H), 1.38 (s, 9H), 1.36 – 1.06 (m, 12H) ppm.

**$^{13}\text{C}$  NMR:** (126 MHz,  $\text{CDCl}_3$ )  $\delta$  159.9, 159.6, 136.5, 129.8, 122.4, 119.4, 115.0, 60.9, 55.7, 46.35, 45.4, 23.8, 21.8, 21.0 ppm.

**Specific rotation:**  $[\alpha]_D^{23} = -1.76$  (c 1.00,  $\text{CHCl}_3$ )

**HRMS:** Calc'd for  $\text{C}_{18}\text{H}_{27}\text{F}_3\text{N}_2\text{O}_2\text{S}$   $[\text{M}+\text{H}^+]$  355.2050; found 355.2051.

**Enantiomeric excess:** 97% ee.

**HPLC Conditions:** Daicel Chiralpak IC column, 70:30 *n*-hexane:*i*-PrOH, flow rate: 1 mL min<sup>-1</sup>, 25 °C, UV detection wavelength: 220 nm, retention time: major: 23.8 min, minor: 30.9 min.

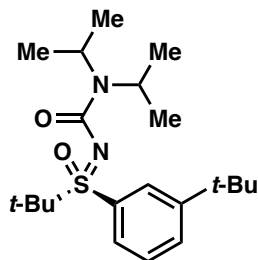

**2n**

GP-1 was followed with no additional modifications: Commercially available 1-bromo-3-(*tert*-butyl) benzene (0.375 mmol, 1.5 eq.) was used. Purified by silica gel column chromatography using hexane/EtOAc (0% to 40% EtOAc gradient) to give the product (68.4 mg, 180  $\mu\text{mol}$ , 72% yield) as a white solid.

**Physical characteristics:** White amorphous solid.

**TLC:**  $R_f$  = 0.20 (hexane/EtOAc, 30% EtOAc).

**$^1\text{H}$  NMR:** (500 MHz,  $\text{CDCl}_3$ ) 7.76 (t,  $J$  = 2.0 Hz, 1H), 7.62 – 7.57 (m, 2H), 7.45 (t,  $J$  = 7.8 Hz, 1H),  $\delta$  3.96 (s, 1H), 4.19 (s, 1H), 1.32 (s, 9H), 1.35 (s, 15H), 1.16 (dd,  $J$  = 21.0, 7.0 Hz, 6H) ppm.

**$^{13}\text{C}$  NMR:** (126 MHz,  $\text{CDCl}_3$ )  $\delta$  159.6, 152.0, 134.5, 129.9, 128.7, 127.6, 127.1, 60.6, 46.52, 45.2, 35.0, 31.3, 23.7, 21.8, 21.0, 20.9 ppm.

**Specific rotation:**  $[\alpha]_D^{23} = -14.47$  (c 1.00,  $\text{CHCl}_3$ )

**HRMS:** Calc'd for  $\text{C}_{21}\text{H}_{37}\text{N}_2\text{O}_2\text{S}$   $[\text{M}+\text{H}^+]$  381.2570; found 381.2572.

**Enantiomeric excess:** >99% ee.

**HPLC Conditions:** Daicel Chiralpak IC column, 70:30 *n*-hexane:*i*-PrOH, flow rate: 1 mL min<sup>-1</sup>, 25 °C, UV detection wavelength: 220 nm, retention time: major: 9.7 min, minor: 14.6 min.

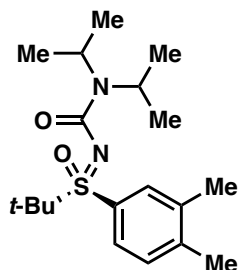

**2o**

GP-1 was followed with no additional modifications: Commercially available 4-bromo-1,2-dimethylbenzene was used. Purified by silica gel column chromatography using hexane/EtOAc (0% to 40% EtOAc gradient) to give the product (73.3 mg, 207  $\mu$ mol, 83% yield) as a white amorphous solid.

**Physical characteristics:** White amorphous solid.

**TLC:**  $R_f$  = 0.15 (hexane/EtOAc, 30% EtOAc).

**$^1\text{H}$  NMR:** (500 MHz,  $\text{CDCl}_3$ )  $\delta$  7.55 (d,  $J$  = 2.0 Hz, 1H), 7.45 (dd,  $J$  = 8.0, 2.0 Hz, 1H), 7.26 (d, 1H, partly overlapped with chloroform peak, see corresponding spectrum for details), 4.13 (s, 1H), 3.99 (s, 1H), 2.30 (t,  $J$  = 1.1 Hz, 6H), 1.37 (s, 15H), 1.16 (dd,  $J$  = 25.2, 6.8 Hz, 6H) ppm.

**$^{13}\text{C}$  NMR:** (126 MHz,  $\text{CDCl}_3$ )  $\delta$  159.8, 142.4, 137.6, 132.1, 131.2, 130.2, 127.6, 60.6, 46.4, 45.21, 23.8, 21.8, 21.0, 20.9, 20.1, 20.0 ppm.

**Specific rotation:**  $[\alpha]_D^{23}$  = +1.08 (c 1.00,  $\text{CHCl}_3$ )

**HRMS:** Calc'd for  $\text{C}_{19}\text{H}_{33}\text{N}_2\text{O}_2\text{S}$   $[\text{M}+\text{H}^+]$  353.2257; found 353.2260.

**Enantiomeric excess:** 98% ee.

**HPLC Conditions:** Daicel Chiralpak IC column, 70:30 *n*-hexane:*i*-PrOH, flow rate: 1 mL min<sup>-1</sup>, 25 °C, UV detection wavelength: 220 nm, retention time: major: 30.8 min, minor: 43.5 min.

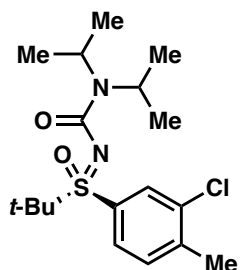

**2p**

GP-1 was followed with no additional modifications: Commercially available 4-bromo-1,2-dimethylbenzene (0.375 mmol, 1.5 eq.) was used. Purified by silica gel column chromatography using hexane/EtOAc (0% to 40% EtOAc gradient) to give the product (71.6 mg, 192  $\mu$ mol, 77% yield) as a white amorphous solid.

**Physical characteristics:** White amorphous solid.

**TLC:**  $R_f$  = 0.20 (hexane/EtOAc, 30% EtOAc).

**$^1\text{H}$  NMR:** (500 MHz,  $\text{CDCl}_3$ )  $\delta$  7.74 (d,  $J$  = 1.9 Hz, 1H), 7.53 (dd,  $J$  = 8.0, 1.9 Hz, 1H), 7.38 (dd,  $J$  = 8.0, 0.9 Hz, 1H), 4.26 – 4.05 (m, 1H), 3.97 (s, 1H), 2.43 (s, 3H), 1.38 (s, 9H), 1.37 – 1.30 (m, 6H), 1.23 – 1.11 (m, 6H) ppm.

**$^{13}\text{C}$  NMR:** (126 MHz,  $\text{CDCl}_3$ )  $\delta$  159.4, 141.8, 135.4, 134.3, 131.4, 130.7, 128.2, 60.9, 46.7, 45.4, 23.8, 21.8, 20.9, 20.8, 20.4 ppm.

**Specific rotation:**  $[\alpha]_D^{23}$  = -2.06 (c 1.00,  $\text{CHCl}_3$ )

**HRMS:** Calc'd for  $\text{C}_{18}\text{H}_{30}\text{ClN}_2\text{O}_2\text{S}$   $[\text{M}+\text{H}^+]$  373.1711; found 373.1714.

**Enantiomeric excess:** 98% ee.

**HPLC Conditions:** Daicel Chiralpak IC column, 70:30 *n*-hexane:*i*-PrOH, flow rate: 1 mL min<sup>-1</sup>, 25 °C, UV detection wavelength: 220 nm, retention time: major: 18.4 min, minor: 21.0 min.

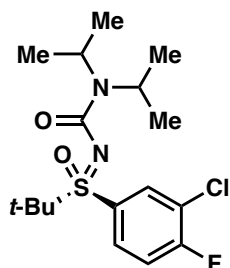

**2q**

GP-1 was followed with no additional modifications: Commercially available 4-bromo-1-chloro-2-fluorobenzene (0.375 mmol, 1.5 eq.) was used. Purified by silica gel column chromatography using hexane/EtOAc (0% to 40% EtOAc gradient) to give the product (71.5 mg, 190  $\mu\text{mol}$ , 76% yield) as a white amorphous solid.

**Physical characteristics:** White amorphous solid.

**TLC:**  $R_f$  = 0.30 (hexane/EtOAc, 30% EtOAc).

**$^1\text{H}$  NMR:** (500 MHz,  $\text{CDCl}_3$ )  $\delta$  7.84 (dd,  $J$  = 6.7, 2.3 Hz, 1H), 7.64 (ddd,  $J$  = 8.7, 4.3, 2.3 Hz, 1H), 7.29 (t,  $J$  = 8.5 Hz, 1H), 4.04 (d,  $J$  = 96.8 Hz, 2H), 1.39 (s, 9H), 1.33 (s, 6H), 1.17 (dd,  $J$  = 24.9, 6.7 Hz, 6H) ppm.

**$^{13}\text{C}$  NMR:** (126 MHz,  $\text{CDCl}_3$ )  $\delta$  162.0, 159.6 (d,  $J$  = 104.2 Hz), 132.9, 132.4 (d,  $J$  = 4.0 Hz), 130.4 (d,  $J$  = 8.3 Hz), 122.6 (d,  $J$  = 18.7 Hz), 117.3 (d,  $J$  = 22.5 Hz), 61.2, 46.7, 45.4, 23.7, 21.8, 20.9, 20.8 ppm.

**$^{19}\text{F}$  NMR:** (471 MHz,  $\text{CDCl}_3$ )  $\delta$  -107.84 ppm.

**Specific rotation:**  $[\alpha]_D^{23}$  = -5.67 (c 1.00,  $\text{CHCl}_3$ )

**HRMS:** Calc'd for  $\text{C}_{17}\text{H}_{27}\text{ClFN}_2\text{O}_2\text{S}$   $[\text{M}+\text{H}^+]$  377.1460; found 377.1454.

**Enantiomeric excess:** 96% ee.

**HPLC Conditions:** Daicel Chiralpak IA column, 95:05 *n*-hexane:*i*-PrOH, flow rate: 1 mL min<sup>-1</sup>, 25 °C, UV detection wavelength: 220 nm, retention time: minor: 11.1 min, major: 14.6 min.

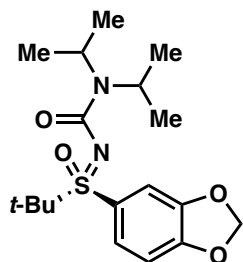

**2r**

GP-1 was followed with no additional change: Commercially available 5-bromobenzo[d][1,3]dioxole (0.375 mmol, 1.5 eq.) was used. Purified by silica gel column chromatography using hexane/EtOAc (0% to 40% EtOAc gradient) to give the product (68.1 mg, 185  $\mu$ mol, 74% yield) as a white amorphous solid.

GP-2 was also used to give no significant change in yield or enantiopurity of the product.

**Physical characteristics:** White amorphous solid.

**TLC:**  $R_f$  = 0.20 (hexane/EtOAc, 50% EtOAc).

**$^1\text{H}$  NMR:** (500 MHz,  $\text{CDCl}_3$ )  $\delta$  7.32 (dd,  $J$  = 8.2, 1.8 Hz, 1H), 7.17 (s, 1H), 6.91 (d,  $J$  = 8.2 Hz, 1H), 6.09 – 6.03 (m, 2H), 4.06 (d,  $J$  = 35.2 Hz, 2H), 1.37 (s, 9H), 1.36 – 1.29 (m, 6H), 1.16 (dd,  $J$  = 21.9, 6.8 Hz, 6H) ppm.

**$^{13}\text{C}$  NMR:** (126 MHz,  $\text{CDCl}_3$ )  $\delta$  159.6, 151.9, 148.3, 128.2, 125.8, 110.2, 108.5, 102.4, 61.0, 46.3, 45.3, 23.8, 21.9, 21.8, 21.0, 20.9 ppm.

**Specific rotation:**  $[\alpha]_D^{23} = +1.57$  (c 1.00,  $\text{CHCl}_3$ )

**HRMS:** Calc'd for  $\text{C}_{18}\text{H}_{29}\text{N}_2\text{O}_4\text{S}$   $[\text{M}+\text{H}^+]$  369.1843; found 369.1840.

**Enantiomeric excess:** 98% ee.

**HPLC Conditions:** Daicel Chiralpak IB column, 95:05 *n*-hexane:*i*-PrOH, flow rate: 1 mL min<sup>-1</sup>, 25 °C, UV detection wavelength: 220 nm, retention time: major: 19.6 min, minor: 23.0 min.

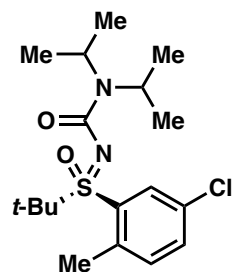

**2s**

GP-1 was followed with no additional modifications: Commercially available 2-bromo-4-chlorotoluene (0.375 mmol, 1.5 eq.) was used. Purified by silica gel column chromatography using hexane/EtOAc (0% to 40% EtOAc gradient) to give the product (67.2 mg, 180  $\mu$ mol, 72% yield) as a white amorphous solid.

**Physical characteristics:** White amorphous solid.

**TLC:**  $R_f = 0.25$  (hexane/EtOAc, 30% EtOAc).

**$^1\text{H}$  NMR:** (500 MHz,  $\text{CDCl}_3$ )  $\delta$  7.81 (s, 1H), 7.39 (dd,  $J = 8.2, 2.3$  Hz, 1H), 7.30 – 7.18 (m, 1H), 4.22 (s, 1H), 3.90 (s, 1H), 2.63 (d,  $J = 9.5$  Hz, 3H), 1.40 (d,  $J = 9.4$  Hz, 9H), 1.35 – 1.14 (m, 12H) ppm.

**$^{13}\text{C}$  NMR:** (126 MHz,  $\text{CDCl}_3$ )  $\delta$  159.5, 135.4, 134.6, 132.7, 132.2, 62.6, 46.9, 45.3, 23.8, 21.7, 21.0, 20.8, 20.6 ppm.

**Specific rotation:**  $[\alpha]_D^{23} = -36.40$  (c 1.00,  $\text{CHCl}_3$ )

**HRMS:** Calc'd for  $\text{C}_{18}\text{H}_{30}\text{ClN}_2\text{O}_2\text{S}$   $[\text{M}+\text{H}^+]$  373.1711; found 373.1710.

**Enantiomeric excess:** 98% ee.

**HPLC Conditions:** Daicel Chiralpak IC column, 70:30 *n*-hexane:*i*-PrOH, flow rate: 1 mL min<sup>-1</sup>, 25 °C, UV detection wavelength: 220 nm, retention time: minor: 8.6 min, major: 11.9 min.

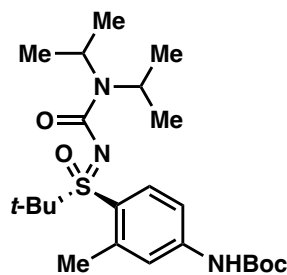

**2t**

GP-1 was followed with additional modifications mentioned below: Commercially available *tert*-butyl (4-bromo-3-methylphenyl) carbamate (0.375 mmol, 1.5 eq.) was used. Equivalents of *n*-BuLi was increased (from 1.5 to 3 eq.). For halogen-Li exchange, the reaction was removed from bath for 15 min. Then cooled down to -78 °C and repeat the process with another 15 min to complete full exchange. The reaction was warmed to -40 °C after addition of ***t*-BuSF** where it stirred for one hour. Purified by silica gel column chromatography using hexane/Acetone (0% to 30% Acetone gradient) to give the product (75.7 mg, 167  $\mu\text{mol}$ , 67% yield) as a white amorphous solid.

**Physical characteristics:** White amorphous solid.

**TLC:**  $R_f = 0.25$  (hexane/Acetone, 30% Acetone).

**$^1\text{H}$  NMR:** (500 MHz,  $\text{CDCl}_3$ )  $\delta$  7.79 (s, 1H), 7.47 (s, 1H), 7.15 (d,  $J = 8.4$  Hz, 1H), 6.71 (s, 1H), 4.35 – 3.79 (m, 2H), 2.58 (s, 3H), 1.49 (s, 9H), 1.38 (s, 9H), 1.34 – 1.16 (m, 12H) ppm.

**$^{13}\text{C}$  NMR:** (126 MHz,  $\text{CDCl}_3$ )  $\delta$  159.6, 152.5, 136.9, 133.6, 123.1, 122.7, 80.6, 62.3, 46.75, 45.1, 28.3, 23.7, 21.7, 21.5, 20.9, 20.8, 20.3 ppm.

**Specific rotation:**  $[\alpha]_D^{23} = -33.81$  (c 1.00,  $\text{CHCl}_3$ )

**HRMS:** Calc'd for  $\text{C}_{23}\text{H}_{39}\text{N}_3\text{NaO}_4\text{S}$   $[\text{M}+\text{Na}^+]$  476.2553; found 476.2549.

**Enantiomeric excess:** 95% ee.

**HPLC Conditions:** Daicel Chiralpak IB column, 95:05 *n*-hexane:*i*-PrOH, flow rate: 1 mL min<sup>-1</sup>, 25 °C, UV detection wavelength: 220 nm, retention time: major: 5.8 min, minor: 7.1 min.

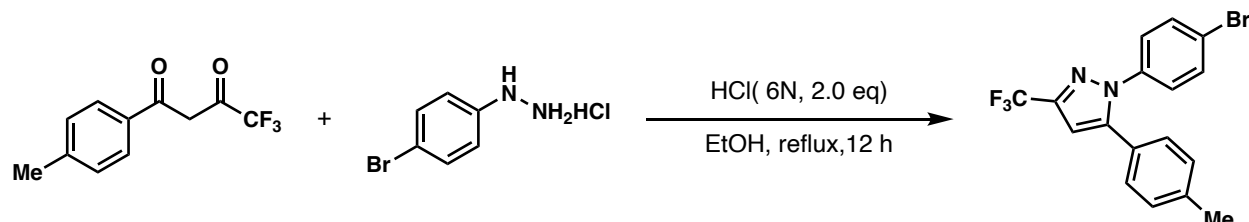

Prepared from a known procedure<sup>9</sup> to afford a white amorphous solid (3.5 g, 92%). Spectroscopic data was in accordance to the literature.

**Physical characteristics:** White amorphous solid.

**TLC:**  $R_f$  = 0.35 (hexane/EtOAc, 10% EtOAc).

**<sup>1</sup>H NMR:** (500 MHz, CDCl<sub>3</sub>)  $\delta$  7.84 (dd,  $J$  = 6.7, 2.3 Hz, 1H), 7.64 (ddd,  $J$  = 8.7, 4.3, 2.3 Hz, 1H), 7.29 (t,  $J$  = 8.5 Hz, 1H), 4.04 (d,  $J$  = 96.8 Hz, 2H), 1.39 (s, 9H), 1.33 (s, 6H), 1.17 (dd,  $J$  = 24.9, 6.7 Hz, 6H) ppm.

**<sup>13</sup>C NMR:** (126 MHz, CDCl<sub>3</sub>)  $\delta$  145.0, 143.6 (q,  $J$  = 38.4 Hz), 139.5, 138.5, 132.4, 129.7, 128.8, 127.0, 126.1, 122.3, 121.3 (q,  $J$  = 269.0 Hz), 105.8 (d,  $J$  = 2.2 Hz), 21.5 ppm.

**<sup>19</sup>F NMR:** (471 MHz, CDCl<sub>3</sub>)  $\delta$  -107.84 ppm.

**HRMS:** Calc'd for C<sub>17</sub>H<sub>13</sub>BrF<sub>3</sub>N<sub>2</sub> [M+H<sup>+</sup>] 381.0209; found 381.0206.

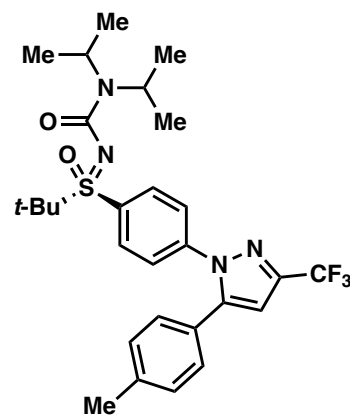

**2u**

GP-1 was followed with no additional modifications: The aryl bromide prepared above (0.375 mmol, 1.5 eq.) was used. Purified by silica gel column chromatography using DCM/EtOAc (0% to 10% EtOAc gradient) to give the product (95.9 mg, 175  $\mu$ mol, 70% yield) as a white solid.

**TLC:**  $R_f$  = 0.35 (hexane/EtOAc, 30% EtOAc).

**<sup>1</sup>H NMR:** (500 MHz, CDCl<sub>3</sub>) δ 7.74 (d, *J* = 8.2 Hz, 2H), 7.49 (d, 2H), 7.18 – 7.09 (m, 4H), 6.73 (s, 1H), 4.37 – 3.58 (m, 2H), 2.34 (s, 3H), 1.34 (s, 9H), 1.25 (d, *J* = 6.8 Hz, 12H) ppm.

**<sup>13</sup>C NMR:** (126 MHz, CDCl<sub>3</sub>) δ 159.2, 145.4, 144.1 (q, *J* = 38.5 Hz), 142.7, 139.8, 134.8, 131.2, 129.8, 128.8, 125.7, 125.0, 121.2 (q, *J* = 269.2 Hz), 106.5 – 106.2 (m), 61.0, 47.1, 45.3, 23.6, 21.4 ppm.

**<sup>19</sup>F NMR:** (471 MHz, CDCl<sub>3</sub>) δ -62.42 ppm.

**Specific rotation:**  $[\alpha]_D^{23} = +42.52$  (c 1.00, CHCl<sub>3</sub>)

**HRMS:** Calc'd for C<sub>28</sub>H<sub>35</sub>F<sub>3</sub>N<sub>4</sub>NaO<sub>2</sub>S [M+Na<sup>+</sup>] 571.2325 found 571.2330.

**Enantiomeric excess:** >99% ee.

**HPLC Conditions:** Daicel Chiralpak IC column, 70:30 *n*-hexane:*i*-PrOH, flow rate: 1 mL min<sup>-1</sup>, 25 °C, UV detection wavelength: 220 nm, retention time: major: 7.7 min, minor: 12.4 min.

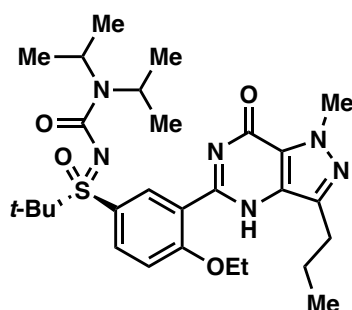

**2v**

GP-3 was followed with additional modifications mentioned: The aryl bromide was prepared using a known procedure.<sup>10</sup> MeLi (0.124 mL, 0.384 mmol, 3.1 M, 1.2 eq.) was added to a solution of the aryl bromide (0.320 mmol, 1 eq.) in Et<sub>2</sub>O (2.5 mL) at -78 °C and stirred for 30 minutes followed by the addition of *n*-BuLi (0.30 mL, 0.48 mmol, 1.6 M, 1.5 eq.). The reaction mixture stirred at -78 °C for 1 hour before warming to -40 °C where it stirred for an additional 30 minutes before cooling to -78 °C. A solution of ***t*-BuSF** (128 mg, 0.48 mmol, 1.5 eq.) in Et<sub>2</sub>O (0.7 mL) was added dropwise at -78 °C then warmed to -20 °C over 1.5 hours. No modification to the quench and work-up were made. Purification by silica gel column chromatography using Hex/EtOAc (0% to 60% EtOAc gradient) provided the product (96.0 mg, 0.172 mmol, 54% yield) as a white amorphous solid.

**Physical characteristic:** White amorphous solid.

**TLC:** R<sub>f</sub> = 0.39 (DCM/MeOH, 5% MeOH).

**<sup>1</sup>H NMR:** (500 MHz, CDCl<sub>3</sub>) δ 10.93 (s, 1H), 8.80 (d, *J* = 2.4 Hz, 1H), 7.94 (dd, *J* = 8.8, 2.4 Hz, 1H), 7.18 (d, *J* = 8.8 Hz, 1H), 4.37 (qd, *J* = 7.0, 1.3 Hz, 2H), 4.26 (s, 3H), 4.15 – 4.06 (m, 1H), 4.06 – 3.93 (m, 1H), 2.87 (t, *J* = 7.5 Hz, 2H), 1.86 – 1.77 (m, 2H), 1.64 (t, *J* = 7.0 Hz, 3H), 1.42 (s, 9H), 1.40 (d, *J* = 7.6 Hz, 6H), 1.14 (d, *J* = 6.8 Hz, 3H), 1.10 (d, *J* = 6.8 Hz, 3H), 0.98 (t, *J* = 7.4 Hz, 3H) ppm.

**<sup>13</sup>C NMR:** <sup>13</sup>C NMR (126 MHz, CDCl<sub>3</sub>) δ 159.5, 159.5, 153.7, 146.8, 146.8, 138.4, 134.3, 132.9, 128.2, 124.5, 120.8, 113.2, 66.1, 60.9, 45.2, 38.2, 29.7, 27.6, 23.6, 22.3, 21.8, 20.8, 20.7, 14.6, 14.0 ppm.

**Specific rotation:**  $[\alpha]_D^{22.5} = -55.56$  (c 0.8, CHCl<sub>3</sub>)

**HRMS:** Calc'd for C<sub>28</sub>H<sub>42</sub>N<sub>6</sub>O<sub>4</sub>SNa [M+Na<sup>+</sup>] 581.2880 found 581.2886.

**Enantiomers were unable to be separated.**

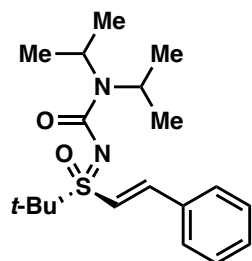

**2w**

GP-1 was followed with no additional modifications: Commercially available β-bromostyrene (0.375 mmol, 1.5 eq.) was used. Purified by silica gel column chromatography using hexane/EtOAc (0% to 40% EtOAc gradient) to give the product (49.0 mg, 140 μmol, 56% yield) as a white amorphous solid. Only Z isomer was detected after purification.

**Physical characteristics:** White amorphous solid.

**TLC:** R<sub>f</sub> = 0.20 (hexane/EtOAc, 30% EtOAc).

**<sup>1</sup>H NMR:** (500 MHz, CDCl<sub>3</sub>) δ 7.56 – 7.51 (m, 3H), 7.41 – 7.37 (m, 3H), 6.92 (d, J = 15.5 Hz, 1H), 4.05 (s, 2H), 1.46 (s, 9H), 1.35 – 1.14 (m, 12H) ppm.

**<sup>13</sup>C NMR:** (126 MHz, CDCl<sub>3</sub>) δ 159.5, 146.2, 133.3, 130.8, 129.0, 128.7, 122.1, 60.5, 45.3, 23.7, 21.6, 20.9 ppm.

**Specific rotation:**  $[\alpha]_D^{23} = +0.64$  (c 1.00, CHCl<sub>3</sub>)

**HRMS:** Calc'd for C<sub>19</sub>H<sub>31</sub>N<sub>2</sub>O<sub>2</sub>S [M+H<sup>+</sup>] 351.2101; found 351.2105.

**Enantiomeric excess:** 98% ee.

**HPLC Conditions:** Daicel Chiralpak IC column, 70:30 *n*-hexane:*i*-PrOH, flow rate: 1 mL min<sup>-1</sup>, 25 °C, UV detection wavelength: 220 nm, retention time: minor: 14.6 min, major: 16.0 min.

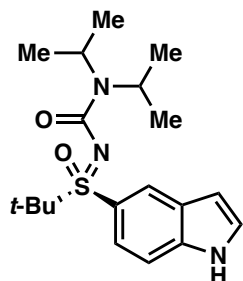

**3a**

GP-3 was followed with additional changes mentioned: Commercially available 5-iodo-1*H*-indole (0.275 mmol, 1.1 eq.) was used. CPME was used instead of Et<sub>2</sub>O and 2.5 eq. of *t*-BuLi was used for the Li-I exchange (-78 °C, 75 minutes). Warmed to -20 °C and held for 1 hour before quenching. No modifications to the quench or work-up procedure were made. Purified by silica gel column chromatography using Hex/EtOAc (0% to 60% EtOAc gradient) to give the product (58 mg, 0.160 mmol, 64% yield) as a white amorphous solid.

**Physical characteristics:** White amorphous solid.

**TLC:** R<sub>f</sub> = 0.16 (hexanes/EtOAc, 60% EtOAc)

**<sup>1</sup>H NMR:** <sup>1</sup>H NMR (500 MHz, CDCl<sub>3</sub>) δ 10.31 (s, 1H), 7.84 (d, *J* = 2.0 Hz, 1H), 7.10 – 7.04 (m, 2H), 6.66 (d, *J* = 8.5 Hz, 1H), 6.28 (s, 1H), 4.49 – 4.23 (m, 1H), 4.16 – 3.96 (m, 1H), 1.46 – 1.38 (m, 6H), 1.35 (s, 9H), 1.34 – 1.28 (m, 6H) ppm.

**<sup>13</sup>C NMR:** (126 MHz, CDCl<sub>3</sub>) δ 160.5, 137.8, 127.5, 127.2, 124.0, 122.5, 120.7, 111.7, 102.3, 61.0, 46.9, 45.2, 23.6, 21.6, 21.1 ppm.

**Specific rotation:**  $[\alpha]_D^{22.2} = -37.62$  (c 0.90, CHCl<sub>3</sub>)

**HRMS:** Calc'd for C<sub>19</sub>H<sub>29</sub>N<sub>3</sub>O<sub>2</sub>SNa [M+Na<sup>+</sup>] 386.1873; found 386.1871.

**Enantiomeric excess:** >99% ee.

**HPLC Conditions:** Daicel Chiralpak IB column, 90:10 *n*-hexane:*i*-PrOH, flow rate: 1 mL/min, 25 °C, UV detection wavelength: 254 nm, retention time: major: 6.9 min, minor: 7.9 min.

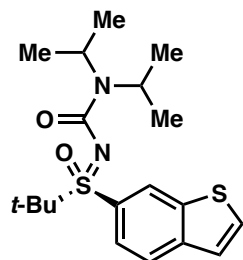

**3b**

GP-1 was followed with no additional change: Commercially available 6-bromobenzo[*b*]thiophene (0.375 mmol, 1.5 eq.) was used. Purified by silica gel column chromatography using hexane/EtOAc (0% to 40% EtOAc gradient) to give the product (62.7 mg, 165 μmol, 66% yield) as a white amorphous solid.

**Physical characteristics:** White amorphous solid.

**TLC:**  $R_f$  = 0.37 (hexanes/EtOAc, 50% EtOAc)

**$^1\text{H}$  NMR:** (500 MHz,  $\text{CDCl}_3$ )  $\delta$  8.36 (s, 1H), 7.90 (d,  $J$  = 8.4 Hz, 1H), 7.71 – 7.60 (m, 2H), 7.38 (d,  $J$  = 5.5 Hz, 1H), 4.17 (s, 1H), 3.96 (s, 1H), 1.46 – 1.30 (m, 15H), 1.14 (dd,  $J$  = 27.1, 6.8 Hz, 6H) ppm.

**$^{13}\text{C}$  NMR:** (126 MHz,  $\text{CDCl}_3$ )  $\delta$  159.5, 142.7, 139.9, 131.1, 130.8, 125.5, 124.9, 123.7, 61.1, 46.5, 45.2, 23.8, 21.9, 20.9, 20.8 ppm.

**Specific rotation:**  $[\alpha]_D^{23} = +7.58$  (c 0.58,  $\text{CHCl}_3$ )

**HRMS:** Calc'd for  $\text{C}_{19}\text{H}_{29}\text{N}_2\text{O}_2\text{S}_2$   $[\text{M}+\text{H}^+]$  381.1665; found 381.1666.

**Enantiomeric excess:** 97% ee.

**HPLC Conditions:** Daicel Chiralpak IA column, 50:50 *n*-hexane:DCM, flow rate: 1 mL/min, 25 °C, UV detection wavelength: 254 nm, retention time: major: 7.4 min, minor: 10.8 min.

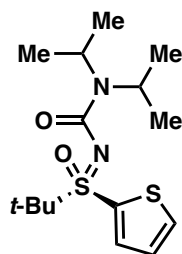

**3c**

GP-1 was followed with no additional change: Commercially available thiophene (0.375 mmol, 1.5 eq.) was used. Purified by silica gel column chromatography using hexane/EtOAc (0% to 40% EtOAc gradient) to give the product (66.0 mg, 200  $\mu\text{mol}$ , 80% yield) as a white amorphous solid.

**Physical characteristics:** White amorphous solid.

**TLC:**  $R_f$  = 0.25 (hexane/EtOAc, 30% EtOAc).

**$^1\text{H}$  NMR:** (500 MHz,  $\text{CDCl}_3$ )  $\delta$  7.71 (dd,  $J$  = 5.0, 1.4 Hz, 1H), 7.55 (dd,  $J$  = 3.7, 1.4 Hz, 1H), 7.15 (dd,  $J$  = 5.0, 3.7 Hz, 1H), 4.23 – 3.84 (m, 2H), 1.45 (s, 9H), 1.30 (d,  $J$  = 7.2 Hz, 6H), 1.20 (d, 6H) ppm.

**$^{13}\text{C}$  NMR:** (126 MHz,  $\text{CDCl}_3$ )  $\delta$  159.1, 136.1, 135.7, 134.4, 127.9, 61.7, 46.8, 45.3, 23.9, 21.70, 21.0, 20.9 ppm.

**Specific rotation:**  $[\alpha]_D^{23} = -28.81$  (c 1.00,  $\text{CHCl}_3$ )

**HRMS:** Calc'd for  $\text{C}_{15}\text{H}_{27}\text{N}_2\text{O}_2\text{S}_2$   $[\text{M}+\text{H}^+]$  331.1508; found 331.1509.

**Enantiomeric excess:** >99% ee.

**HPLC Conditions:** Daicel Chiralpak IC column, 70:30 *n*-hexane:*i*-PrOH, flow rate: 1 mL min<sup>-1</sup>, 25 °C, UV detection wavelength: 220 nm, retention time: major: 20.7 min, minor: 23.8 min.

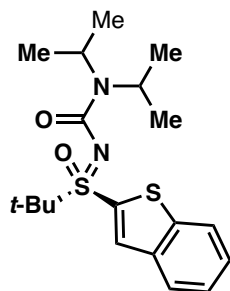

**3d**

GP-1 was followed with no additional change: Commercially available benzo[*b*]thiophene (0.375 mmol, 1.5 eq.) was used. Purified by silica gel column chromatography using hexane/EtOAc (0% to 50% EtOAc gradient) to give the product (85.5 mg, 225  $\mu$ mol, 90% yield) as a white amorphous solid.

**Physical characteristics:** White amorphous solid.

**TLC:**  $R_f$  = 0.10 (hexane/EtOAc, 30% EtOAc).

**$^1\text{H}$  NMR:** (500 MHz,  $\text{CDCl}_3$ )  $\delta$  7.90 – 7.81 (m, 3H), 7.48 – 7.40 (m, 2H), 4.08 (s, 2H), 1.51 (s, 9H), 1.26 (s, 12H) ppm.

**$^{13}\text{C}$  NMR:** (126 MHz,  $\text{CDCl}_3$ )  $\delta$  159.1, 143.6, 138.4, 137.1, 133.2, 127.0, 125.8, 125.3, 122.6, 62.1, 45.5, 24.0, 21.8, 21.0 ppm.

**Specific rotation:**  $[\alpha]_D^{23} = -11.42$  (c 1.00,  $\text{CHCl}_3$ )

**HRMS:** Calc'd for  $\text{C}_{19}\text{H}_{29}\text{N}_2\text{O}_2\text{S}_2$   $[\text{M}+\text{H}^+]$  381.1665; found 381.1668.

**Enantiomeric excess:** >99% ee.

**HPLC Conditions:** Daicel Chiralpak IC column, 70:30 *n*-hexane:*i*-PrOH, flow rate: 1 mL min<sup>-1</sup>, 25 °C, UV detection wavelength: 220 nm, retention time: minor: 33.6 min, major: 40.7 min.

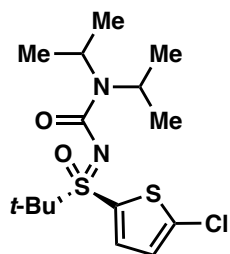

**3e**

GP-1 was followed with additional modifications mentioned below: Commercially available 2-bromo-5-chloro-thiophene (0.375 mmol, 1.5 eq.) was used. The reaction was warmed up to -40 °C. Purification was performed immediately after work-up by silica gel column chromatography using hexane/EtOAc (0% to 45% EtOAc gradient) to give the product (74.6 mg, 205  $\mu$ mol, 82% yield) as a white amorphous solid.

GP-2 was used for a gram scale synthesis with no change in yield or enantiopurity of product.

**Note:** The product showed stability issues in the crude reaction mixture after quenching unlike other *tert*-butyl sulfoximines. The stability was no longer an issue once the product was isolated after column chromatography.

**Physical characteristics:** White amorphous solid.

**TLC:**  $R_f$  = 0.50 (hexane/EtOAc, 33% EtOAc).

**$^1\text{H}$  NMR:** (500 MHz,  $\text{CDCl}_3$ )  $\delta$  7.33 (d,  $J$  = 4.0 Hz, 1H), 6.99 (d,  $J$  = 4.0 Hz, 1H), 4.03 (s, 2H), 1.47 – 1.44 (m, 9H), 1.28 – 1.20 (m, 12H) ppm.

**$^{13}\text{C}$  NMR:** (126 MHz,  $\text{CDCl}_3$ )  $\delta$  158.9, 139.3, 135.1, 134.1, 127.7, 62.0, 46.1, 23.8, 21.3 ppm.

**Specific rotation:**  $[\alpha]_D^{23} = -33.04$  (c 1.00,  $\text{CHCl}_3$ )

**HRMS:** Calc'd for  $\text{C}_{15}\text{H}_{26}\text{ClN}_2\text{O}_2\text{S}_2$   $[\text{M}+\text{H}^+]$  365.1119; found 365.1122.

**Enantiomeric excess:** >99% ee.

**HPLC Conditions:** Daicel Chiralpak IA column, 95:05 *n*-hexane:*i*-PrOH, flow rate: 1 mL min<sup>-1</sup>, 25 °C, UV detection wavelength: 220 nm, retention time: minor: 12.8 min, major: 14.9 min.

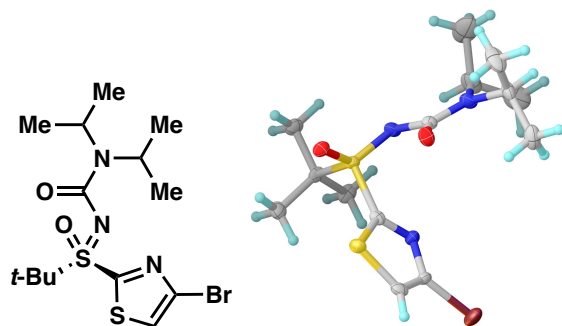

**3f**

GP-1 was followed with no additional change: Commercially available 4-bromothiazole (0.375 mmol, 1.5 eq.) was used. Purified by silica gel column chromatography using hexane/EtOAc (0% to 50% EtOAc gradient) to give the product (72.8 mg, 178  $\mu\text{mol}$ , 71% yield) as a white crystalline solid.

**Physical characteristics:** White crystalline solid.

**TLC:**  $R_f$  = 0.30 (hexane/EtOAc, 40% EtOAc).

**$^1\text{H}$  NMR:** (500 MHz,  $\text{CDCl}_3$ )  $\delta$  7.62 (s, 1H), 4.01 (s, 2H), 1.53 (s, 9H), 1.34 – 1.27 (m, 6H), 1.15 (dd,  $J$  = 21.5, 6.8 Hz, 6H) ppm.

**$^{13}\text{C}$  NMR:** (126 MHz,  $\text{CDCl}_3$ )  $\delta$  165.7, 158.4, 126.8, 125.5, 62.5, 46.8, 45.6, 24.0, 21.8, 20.8, 20.6 ppm.

**Specific rotation:**  $[\alpha]_D^{23} = -32.43$  (c 1.00,  $\text{CHCl}_3$ )

**HRMS:** Calc'd for  $\text{C}_{14}\text{H}_{24}\text{BrN}_3\text{NaO}_2\text{S}_2$   $[\text{M}+\text{Na}^+]$  432.0386; found 432.0383.

**Melting Point:** 140-142 °C

**Enantiomeric excess:** >99% ee.

**HPLC Conditions:** Daicel Chiralpak IC column, 70:30 *n*-hexane:*i*-PrOH, flow rate: 1 mL min<sup>-1</sup>, 25 °C, UV detection wavelength: 220 nm, retention time: major: 8.6 min, minor: 10.3 min.

**CCDC deposition Number:** 2243803

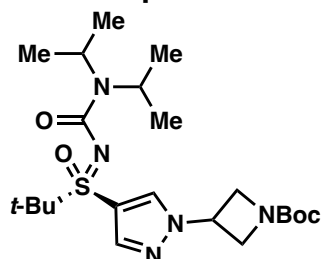

**3g**

GP-3 was followed with additional changes mentioned: *tert*-butyl 3-(4-bromo-1*H*-pyrazol-1-yl)azetidine-1-carboxylate (0.30 mmol, 1.2 eq.) was prepared by a known procedure.<sup>11</sup> CPME was used as the solvent instead of Et<sub>2</sub>O and 2.2 eq. of *t*-BuLi was used. The reaction was warmed to -20 °C and stirred for 30 minutes before quenching (2 hours total time after addition of *t*-BuSF. Full Li–Br exchange was not achieved). Purified by silica gel column chromatography using Hex/EtOAc (0% to 100% EtOAc gradient) to give the product (65 mg, 0.138 mmol, 55% yield) as a colorless foam.

**Physical characteristics:** Colorless foam.

**TLC:** R<sub>f</sub> = 0.19 (hexanes/EtOAc, 80% EtOAc)

**<sup>1</sup>H NMR:** (500 MHz, CDCl<sub>3</sub>) δ 7.85 (s, 1H), 7.60 (s, 1H), 4.99 (tt, *J* = 7.7, 5.5 Hz, 1H), 4.34 – 4.26 (m, 4H), 4.06 (s, 1H), 3.83 (s, 1H), 1.39 (s, 9H), 1.34 (s, 9H), 1.19 (d, *J* = 6.9 Hz, 6H), 1.14 (d, *J* = 5.5 Hz, 3H), 1.11 (d, *J* = 5.8 Hz, 3H) ppm.

**<sup>13</sup>C NMR:** (126 MHz, CDCl<sub>3</sub>) δ 159.2, 156.0, 141.1, 133.5, 116.8, 80.4, 60.4, 56.3, 50.9, 46.6, 45.2, 28.3, 23.3, 21.5, 21.1, 20.8 ppm.

**Specific rotation:**  $[\alpha]_D^{22.4} = -63.03$  (c 1.00, CHCl<sub>3</sub>)

**HRMS:** Calc'd for C<sub>22</sub>H<sub>40</sub>N<sub>5</sub>O<sub>4</sub>S [M+H]<sup>+</sup> 470.2796; found 470.2787.

**Enantiomeric excess:** >99% ee.

**HPLC Conditions:** Daicel Chiralpak IC column, 70:30 *n*-hexane:*i*-PrOH, flow rate: 1 mL min<sup>-1</sup>, 25 °C, UV detection wavelength: 220 nm, retention time: major: 35.5 min, minor: 57.9 min,

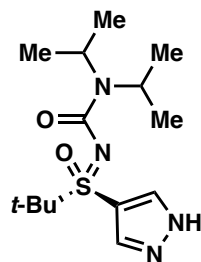

**3h**

GP-3 was followed with additional changes mentioned: Commercially available 4-bromopyrazole (0.375 mmol, 1.5 eq.) was used with an increased equivalence of *n*-BuLi (from 1.5 to 3 eq.). For halogen-Li exchange, the reaction was removed from bath for 15 min. Then cooled down to -78 °C and repeat this process with another 15 min to complete full exchange. The reaction was warmed to room temperature after addition of *t*-BuSF and stirred for 30 minutes. The compound is not UV active and PMA stain was used for TLC visualization. Purified by silica gel column chromatography using DCM/MeOH (0% to 10% MeOH gradient) to give the product (62 mg, 197.5 μmol, 79% yield) as a white amorphous solid.

**Physical characteristics:** White amorphous solid.

**TLC:**  $R_f$  = 0.40 (DCM/MeOH, 10% MeOH)

**<sup>1</sup>H NMR:** (500 MHz, CDCl<sub>3</sub>) δ 7.62 (s, 2H), 4.36 – 3.78 (m, 2H), 1.38 (s, 9H), 1.30 (d, *J* = 7.5 Hz, 12H) ppm.

**<sup>13</sup>C NMR:** (126 MHz, CDCl<sub>3</sub>) δ 160.6, 137.2, 113.7, 60.5, 47.1, 45.6, 23.2, 21.4, 20.9 ppm.

**Specific rotation:**  $[\alpha]_D^{23} = -76.09$  (c 1.00, CHCl<sub>3</sub>)

**HRMS:** Calc'd for C<sub>14</sub>H<sub>27</sub>N<sub>4</sub>O<sub>2</sub>S [M+H<sup>+</sup>] 315.1849; found 315.1840.

**Enantiomeric excess:** 95% ee.

**HPLC Conditions:** Daicel Chiralpak IC column, 70:30 *n*-hexane:*i*-PrOH, flow rate: 1 mL min<sup>-1</sup>, 25 °C, UV detection wavelength: 220 nm, retention time: minor: 13.3 min, major: 14.9 min.

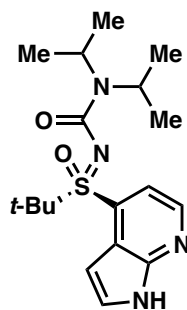

**3i**

GP-3 was followed with additional changes mentioned: Commercially available 4-bromo-1*H*-pyrrolo[2,3-*b*]pyridine (0.275 mmol, 1.1 eq.) was used. CPME was used instead of Et<sub>2</sub>O and 2.5 eq. of *t*-BuLi was used for the Li-I exchange (-78 °C, 70 minutes: full exchange). Warmed to -10 °C and held for 2 hours before quenching (3 hours total time after addition of *t*-BuSF). No modifications to the quench or work-up procedure were made. Purified by silica gel column chromatography using Hex/EtOAc (0% to 60% EtOAc gradient) to give the product (75 mg, 0.208 mmol, 82% yield) as a clear colorless oil.

**Physical characteristics:** Clear colorless oil.

**TLC:**  $R_f$  = 0.24 (hexanes/EtOAc, 60% EtOAc)

**<sup>1</sup>H NMR:** (500 MHz, CDCl<sub>3</sub>) δ 10.55 (s, 1H), 8.35 (d, *J* = 4.9 Hz, 1H), 7.50 – 7.29 (m, 1H), 7.24 (t, *J* = 2.9 Hz, 1H), 6.75 – 6.70 (m, 1H), 4.41 – 4.16 (m, 1H), 4.08 – 3.86 (m, 1H), 1.41 (d, *J* = 6.7 Hz, 6H), 1.39 (s, 9H), 1.23 (d, *J* = 6.7 Hz, 3H), 1.16 (d, *J* = 6.6 Hz, 3H) ppm.

**<sup>13</sup>C NMR:** (126 MHz, CDCl<sub>3</sub>) δ 159.7, 149.6, 141.6, 134.5, 128.7, 119.1, 117.1, 101.1, 62.0, 46.7, 45.4, 23.7, 21.9, 21.7, 20.9, 20.8 ppm.

**Specific rotation:**  $[\alpha]_D^{25.6} = -3.57$  (c 1.00, CHCl<sub>3</sub>)

**HRMS:** Calc'd for C<sub>18</sub>H<sub>28</sub>N<sub>4</sub>O<sub>2</sub>SNa [M+Na<sup>+</sup>] 387.1825; found 387.1829.

**Enantiomeric excess:** 97% ee.

**HPLC Conditions:** Daicel Chiralpak IB column, 95:5 *n*-hexane:*i*-PrOH, flow rate: 1 mL/min, 25 °C, UV detection wavelength: 220 nm, retention time: minor: 22.3 min, major: 25.6 min.

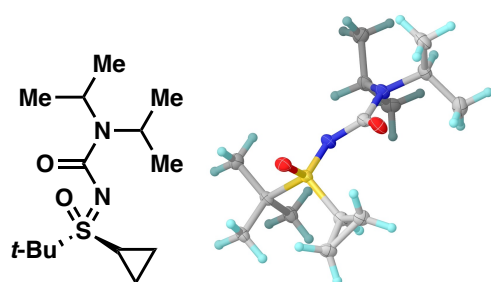

**4a**

GP-2 was followed with additional changes mentioned: commercially available cyclopropylbromide (0.375 mmol, 1.5 eq.) was used and lithiated with *t*-BuLi (3 eq.) at -78 °C. The reaction was warmed to -40 °C after addition of ***t*-BuSF** and stirred for one hour. Purified by silica gel column chromatography using hexane/EtOAc (0% to 60% EtOAc gradient) to give the product (51.0 mg, 176 μmol, 70% yield) as a white crystalline solid.

#### *Different scale reactions:*

GP-2 was used with *t*-BuSF (2.0 g, 7.51 mmol, 1 eq.), cyclopropyl bromide (1.20 mL, 15.0 mmol, 2 eq.), and *t*-BuLi (8.8 mL, 15.0 mmol, 1.7 M, 2 eq.) to give (1.71 g, 5.93 mmol, 79% yield, 97% ee).

GP-2 was used with *t*-BuSF (5.65 g, 21.2 mmol, 1 eq.), cyclopropyl bromide (3.40 mL, 42.4 mmol, 2 eq.), and *t*-BuLi (25 mL, 42.4 mmol, 1.7 M, 2 eq.) to give (4.28g, 14.8 mmol, 70% yield, 97% ee).

**Physical characteristics:** White crystalline solid.

**TLC:** R<sub>f</sub> = 0.2 (hexane/EtOAc, 40% EtOAc).

**<sup>1</sup>H NMR:** (500 MHz, CDCl<sub>3</sub>) δ 4.00 (s, 2H), 2.51 – 2.40 (m, 1H), 1.60 (ddt, *J* = 10.2, 7.5, 5.1 Hz, 1H), 1.48 (s, 9H), 1.29 – 1.12 (m, 14H), 1.11 – 1.01 (m, 1H) ppm.

**<sup>13</sup>C NMR:** (126 MHz, CDCl<sub>3</sub>) δ 158.8, 62.5, 46.5, 45.1, 24.7, 24.3, 21.5, 20.9, 7.4, 5.1. ppm.

**Specific rotation:**  $[\alpha]_D^{23} = +15.99$  (c 1.00, CHCl<sub>3</sub>)

**HRMS:** Calc'd for C<sub>14</sub>H<sub>29</sub>N<sub>2</sub>O<sub>2</sub>S [M+H<sup>+</sup>] 289.1944; found 289.2952.

**Melting Point:** 175-177 °C

**Enantiomeric excess:** 97% ee. Recrystallized to >99% ee with >90% recovery.

**HPLC Conditions:** Daicel Chiralpak IC column, 70:30 *n*-hexane:*i*-PrOH, flow rate: 1 mL min<sup>-1</sup>, 25 °C, UV detection wavelength: 220 nm, retention time: minor: 10.8 min, major: 11.9 min.

**CCDC deposition Number:** 2243800

### IXb. S-Activation and functionalization.

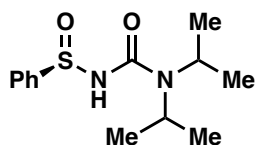

**S5a**

GP-4 was followed with no additional change: *tert*-butyl phenyl sulfoximine of >99% ee was used (97 mg, 0.30 mmol, 1 eq.). Purified by a short plug of silica gel eluting with DCM to give the product (71.0 mg, 0.264 mmol, 88% yield) as a white amorphous solid.

#### *Different scale reactions:*

(1.24 g, 3.82 mmol, >99% ee) produced (0.88 g, 3.28 mmol, 86% yield, >99% ee)

(3.01 g, 9.28 mmol, >99% ee) produced (2.22g, 8.27 mmol, 89% yield, >99% ee)

**Physical characteristics:** White amorphous solid.

**TLC:** R<sub>f</sub> = 0.33 (hexane/acetone, 33% acetone).

**<sup>1</sup>H NMR:** (500 MHz, CDCl<sub>3</sub>) δ 7.61 (dd, *J* = 7.9, 1.8 Hz, 2H), 7.48 – 7.42 (m, 3H), 7.37 (s, 1H), 3.74 (hept, *J* = 6.8 Hz, 2H), 1.24 (d, *J* = 4.1 Hz, 6H), 1.23 (d, *J* = 4.1 Hz, 6H) ppm.

**<sup>13</sup>C NMR:** (126 MHz, CDCl<sub>3</sub>) δ 153.7, 144.4, 131.3, 129.2, 125.2, 46.9, 21.3, 20.9 ppm.

**Specific rotation:**  $[\alpha]_D^{23} = -149.55$  (c 1.00, CHCl<sub>3</sub>)

**HRMS:** Calc'd for C<sub>13</sub>H<sub>20</sub>N<sub>2</sub>O<sub>2</sub>SN<sub>a</sub> [M+Na<sup>+</sup>] 291.1138; found 291.1144.

**Enantiomeric excess:** >99% ee.

**HPLC Conditions:** Daicel Chiralpak IA column, 50:50 *n*-hexane:DCM, flow rate: 1 mL min<sup>-1</sup>, 25 °C, UV detection wavelength: 220 nm, retention time: minor: 16.2 min, major: 20.1 min.

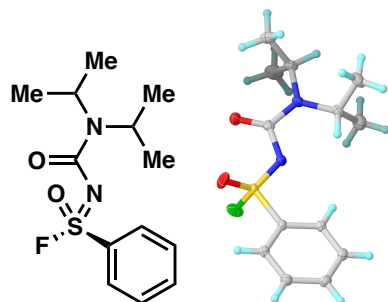

**S6a**

GP-6 was followed and no additional change: *tert*-butyl phenyl sulfoximine of >99% ee was used (500 mg, 1.5 mmol, 1.0 eq). Purified by silica gel column chromatography using hexane/EtOAc (0% to 25% EtOAc gradient) to give the product (370 mg, 1.3 mmol, 84% yield) as a white crystalline solid.

*Different scale reactions:*

(1.0 g, 3.08 mmol, >99% ee) produced (689 mg, 2.41 mmol, 78% yield, >99% ee)

(2.0 g, 6.16 mmol, >99% ee) produced (1.31 g, 4.57 mmol, 74% yield, >99% ee)

**Physical characteristics:** White crystalline solid.

**TLC:**  $R_f$  = 0.3 (hexane/EtOAc, 20% EtOAc).

**$^1\text{H}$  NMR:** (500 MHz,  $\text{CDCl}_3$ )  $\delta$  8.09 – 8.02 (m, 2H), 7.76 – 7.69 (m, 1H), 7.61 (t,  $J$  = 7.9 Hz, 2H), 4.16 (s, 1H), 3.84 (s, 1H), 1.31 (dd,  $J$  = 6.9, 3.4 Hz, 6H), 1.21 (t,  $J$  = 6.6 Hz, 6H) ppm.

**$^{13}\text{C}$  NMR:** (126 MHz,  $\text{CDCl}_3$ )  $\delta$  153.3 (d,  $J$  = 3.2 Hz), 135.4 (d,  $J$  = 22.6 Hz), 135.0, 129.6, 127.7, 48.3, 45.9, 21.3, 20.6, 20.5 ppm.

**$^{19}\text{F}$  NMR:** (471 MHz,  $\text{CDCl}_3$ )  $\delta$  69.53 ppm.

**Specific rotation:**  $[\alpha]_D^{23} = +30.26$  (c 1.00,  $\text{CHCl}_3$ )

**HRMS:** Calc'd for  $\text{C}_{13}\text{H}_{20}\text{FN}_2\text{O}_2\text{S}$   $[\text{M}+\text{H}^+]$  287.1224; found 287.1224.

**Melting Point:** 102-105 °C

**Enantiomeric excess:** >99% ee.

**HPLC Conditions:** Daicel Chiralpak IC column, 70:30 *n*-hexane:*i*-PrOH, flow rate: 1 mL min<sup>-1</sup>, 25 °C, UV detection wavelength: 220 nm, retention time: minor: 13.0 min, major: 15.1 min.

**CCDC deposition Number:** 2243798

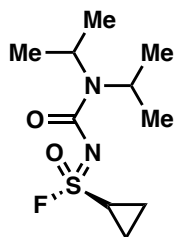

**S6b**

GP-6 was followed and no additional change: *tert*-butyl cyclopropyl sulfoximine of >99% ee (1.04 mmol, 1.0 eq) was used. Purified by silica gel column chromatography using hexane/EtOAc (0% to 25% EtOAc gradient) to give the product (232 mg, 0.927 mmol, 89% yield) as colorless oil which slowly solidified into a white amorphous solid.

**Physical characteristics:** White amorphous solid.

**TLC:**  $R_f$  = 0.3 (hexane/EtOAc, 20% EtOAc).

**$^1\text{H}$  NMR:** (500 MHz,  $\text{CDCl}_3$ )  $\delta$  4.15 (s, 1H), 3.80 (s, 1H), 3.36 (dq,  $J$  = 8.2, 3.9 Hz, 1H), 1.55 – 1.43 (m, 2H), 1.33 – 1.27 (m, 6H), 1.25 (dq,  $J$  = 7.9, 1.7 Hz, 2H), 1.19 (d,  $J$  = 6.4 Hz, 6H) ppm.

**$^{13}\text{C}$  NMR:** (126 MHz,  $\text{CDCl}_3$ )  $\delta$  154.1 (d,  $J$  = 3.3 Hz), 48.1, 45.7, 30.1 (d,  $J$  = 27.0 Hz), 20.9 (d,  $J$  = 72.0 Hz), 7.2, 6.5 ppm.

**$^{19}\text{F}$  NMR:** (471 MHz,  $\text{CDCl}_3$ )  $\delta$  62.06 ppm.

**Specific rotation:**  $[\alpha]_D^{23} = +38.58$  (c 1.00,  $\text{CHCl}_3$ )

**HRMS:** Calc'd for  $\text{C}_{10}\text{H}_{20}\text{N}_2\text{O}_2\text{S}$   $[\text{M}+\text{H}^+]$  251.1224; found 251.1218.

**Enantiomeric excess:** >99% ee.

**HPLC Conditions:** Daicel Chiralpak IC column, 70:30 *n*-hexane:*i*-PrOH, flow rate: 1 mL min<sup>-1</sup>, 25 °C, UV detection wavelength: 220 nm, retention time: minor: 7.4 min, major: 8.2 min.

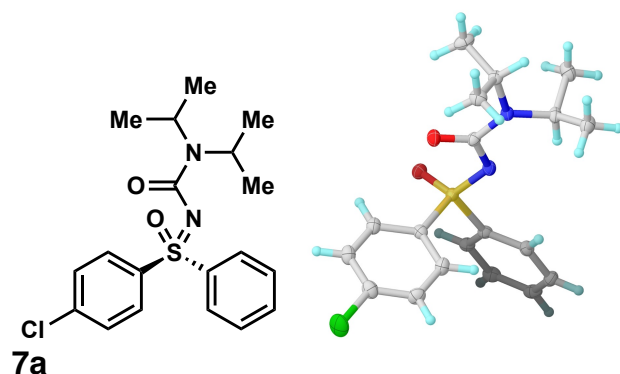

GP-7 (Grignard reagent) was followed with no additional modification: Commercially available 4-chlorophenylmagnesium bromide (0.275 mmol, 1.1 eq., 1.0 M solution in  $\text{Et}_2\text{O}$ ) from Sigma-Aldrich was used with Sulfonimidoyl fluoride **S6a** (0.25 mmol, 1 eq.). Purified by silica gel column chromatography using hexane/EtOAc (0% to 50% EtOAc gradient) to give the product (89.8 mg, 0.237 mmol, 95% yield, >99% ee) as a white amorphous solid.

GP-8 (turbo-Grignard reagent) was followed with additional modifications mentioned: Commercially available 4-chloro-bromobenzene (0.275 mmol, 1.1 eq.) in dry THF (0.2 mL) was added at room temperature in one portion to the stirring isopropylmagnesium chloride lithium chloride complex solution (0.21 mL, 0.275 mmol, 1.1 eq. 1.3 M in THF), exchange takes about 12 hours. Purified by silica gel column chromatography using

hexane/EtOAc (0% to 50% EtOAc gradient) to give the product (56.7 mg, 0.15 mmol, 60% yield, >99% ee) as a white amorphous solid.

GP-1 (organolithium) was followed with no additional modifications: Purified by silica gel column chromatography using hexane/EtOAc (0% to 50% EtOAc gradient) to give the product (75.6 mg, 0.2 mmol, 80% yield, 94% ee) as a white amorphous solid.

**Physical characteristics:** White amorphous solid.

**TLC:**  $R_f$  = 0.6 (hexane/EtOAc, 50% EtOAc).

**$^1\text{H}$  NMR:** (600 MHz,  $\text{CDCl}_3$ )  $\delta$  7.96 – 7.93 (m, 2H), 7.88 – 7.84 (m, 2H), 7.56 – 7.52 (m, 1H), 7.52 – 7.48 (m, 2H), 7.46 – 7.42 (m, 2H), 4.12 (br, 2H), 1.28 (s, 12H) ppm.

**$^{13}\text{C}$  NMR:** (151 MHz,  $\text{CDCl}_3$ )  $\delta$  158.7, 141.0, 140.2, 139.3, 132.9, 129.7, 129.6, 129.1, 127.7, 46.3, 21.3 ppm.

**Specific rotation:**  $[\alpha]_D^{23} = -3.42$  (c 1.00,  $\text{CHCl}_3$ )

**Melting Point:** 129-131 °C

**HRMS:** Calc'd for  $\text{C}_{19}\text{H}_{24}\text{ClN}_2\text{O}_2\text{S}^+$   $[\text{M}+\text{H}^+]$  379.1242; found 379.1242.

**Enantiomeric excess:** >99% ee for both Grignard and turbo-Grignard reagents. 94% ee for organolithium reagent.

**HPLC Conditions:** Daicel Chiralpak IC column, 70:30 *n*-hexane:*i*-PrOH, flow rate: 1 mL min<sup>-1</sup>, 25 °C, UV detection wavelength: 220 nm, retention time: minor: 18.9 min, major: 22.4 min.

**CCDC deposition Number:** 2243808

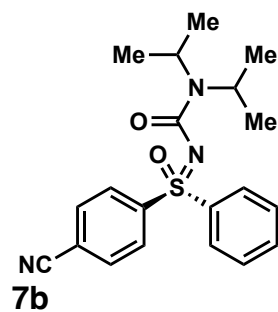

GP-8 was used with additional modifications mentioned: A solution of commercially available 4-iodobenzonitrile (63 mg, 0.275 mmol, 1.1 eq.) in dry THF (0.25 mL) was added to isopropylmagnesium chloride lithium chloride complex solution (0.21 mL, 0.275 mmol, 1.1 eq. 1.3 M in THF) dropwise at -78 °C. Upon gradual warming to -10 °C for 4 hours (the reaction mixture turned yellow), then a solution of Sulfonimidoyl fluoride **S6a** (0.25 mmol, 1 eq.) in THF (0.25 mL) was added, workup procedure as described in GP-8. Purified by silica gel column chromatography using hexane/EtOAc (0% to 50% EtOAc gradient) to give the product (90.4 mg, 0.245 mmol, 98% yield) as a colorless oil.

GP-12 was followed with the Mg–X exchange as described above with 2 equivalents of turbo-Grignard reagent: Sulfonimidoyl fluoride **S6a** (0.25 mmol, 1 eq.) was used to provide (65 mg, 176  $\mu$ mol, 70% yield) as colorless oil.

**Physical characteristics:** Colorless oil.

**TLC:**  $R_f$  = 0.71 (hexane/EtOAc, 50% EtOAc).

**$^1\text{H}$  NMR:** (500 MHz,  $\text{CDCl}_3$ )  $\delta$  8.03 – 7.99 (m, 2H), 7.99 – 7.95 (m, 2H), 7.73 (d,  $J$  = 8.4 Hz, 2H), 7.59 – 7.54 (m, 1H), 7.51 (dd,  $J$  = 8.4, 6.7 Hz, 2H), 4.28 (br, 1H), 3.92 (br, 1H), 1.55 – 0.96 (m, 12H) ppm.

**$^{13}\text{C}$  NMR:** (126 MHz,  $\text{CDCl}_3$ )  $\delta$  158.3, 146.6, 139.5, 133.5, 133.1, 129.7, 128.1, 127.9, 117.4, 116.0, 47.1, 45.6, 21.3, 21.2, 21.1, 21.0 ppm.

**Specific rotation:**  $[\alpha]_D^{23}$  = -19.16 (c 1.00,  $\text{CHCl}_3$ )

**HRMS:** Calc'd for  $\text{C}_{20}\text{H}_{24}\text{N}_3\text{O}_2\text{S}^+$   $[M+H]^+$  370.1584; found 370.1576.

**Enantiomeric excess:** >99% ee.

**HPLC Conditions:** Daicel Chiralpak IC column, 70:30 *n*-hexane:*i*-PrOH, flow rate: 1 mL min<sup>-1</sup>, 25 °C, UV detection wavelength: 254 nm, retention time: minor: 28.3 min, major: 35.3 min.

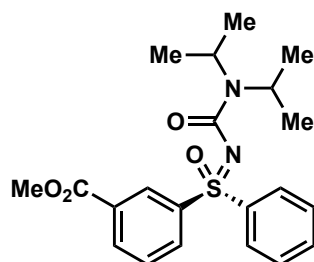

**7c**

GP-8 was used with additional modifications mentioned: A solution of commercially available methyl 3-iodobenzoate (72.1 mg, 0.275 mmol, 1.1 eq.) in dry THF (0.25 mL) was added to isopropylmagnesium chloride lithium chloride complex solution (0.21 mL, 0.275 mmol, 1.1 eq. 1.3 M in THF) dropwise at -78 °C, to. Upon gradual warming to -10 °C for 4 hours (the reaction mixture turned yellow) then a solution of Sulfonimidoyl fluoride **S6a** (0.25 mmol, 1 eq.) in THF (0.25 mL) was added. Work-up procedure as described in GP-8. Purified by silica gel column chromatography using DCM/acetone, (0% to 10% Acetone gradient) to give the product (63.4 mg, 0.158 mmol, 63% yield) as a colorless oil.

**Physical characteristics:** Colorless oil.

**TLC:**  $R_f$  = 0.84 (DCM/acetone, 10% acetone).

**$^1\text{H}$  NMR:** (500 MHz,  $\text{CDCl}_3$ )  $\delta$  8.58 (t,  $J$  = 1.8 Hz, 1H), 8.15 (dt,  $J$  = 7.8, 1.4 Hz, 1H), 8.11 (ddd,  $J$  = 8.0, 2.0, 1.2 Hz, 1H), 8.01 – 7.93 (m, 2H), 7.56 (t,  $J$  = 7.9 Hz, 1H), 7.53 – 7.46 (m, 3H), 4.19 (br, 2H), 3.90 (s, 3H), 1.29 (s, 12H) ppm.

**$^{13}\text{C}$  NMR:** (126 MHz,  $\text{CDCl}_3$ )  $\delta$  165.4, 158.6, 142.4, 140.6, 133.4, 132.9, 131.6, 131.5, 129.6, 129.5, 128.8, 127.7, 52.6, 46.1, 21.2 ppm.

**Specific rotation:**  $[\alpha]_D^{23} = -8.82$  (c 1.00,  $\text{CHCl}_3$ )

**HRMS:** Calc'd for  $\text{C}_{21}\text{H}_{27}\text{N}_2\text{O}_4\text{S}^+$   $[\text{M}+\text{H}^+]$  403.1686; found 403.1675.

**Enantiomeric excess:** >99% ee.

**HPLC Conditions:** Daicel Chiralpak IB column, 95:05 *n*-hexane:*i*-PrOH, flow rate: 1 mL min<sup>-1</sup>, 25 °C, UV detection wavelength: 220 nm, retention time: major: 26.7 min, minor: 29.4 min.

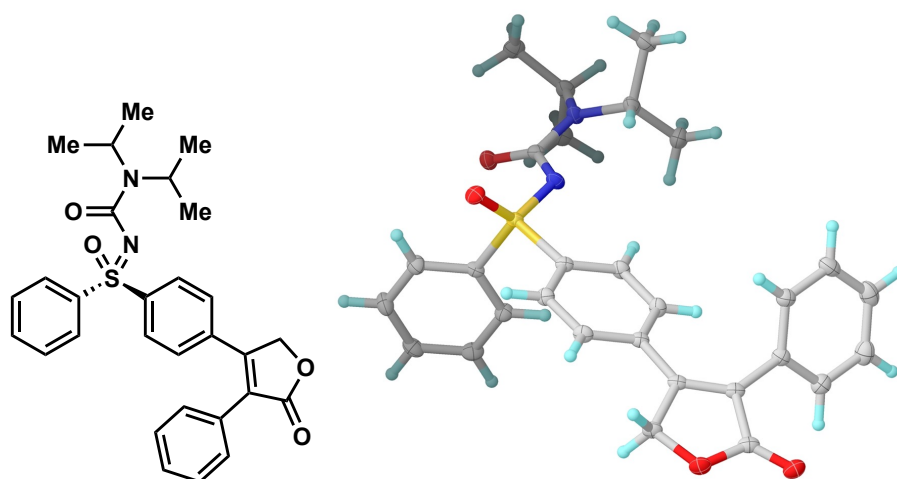

**7d**

GP-8 was used with additional changes mentioned: 4-(4-iodophenyl)-3-phenylfuran-2(5H)-one (60.5 mg, 0.25 mmol, 1 eq.) in 0.3 mL dry THF was added at room temperature in one portion to the stirring isopropylmagnesium chloride lithium chloride complex solution (0.38 mL, 0.5 mmol, 2 eq. 1.3 M in THF), the reaction mixture turned turbid orange and exchange takes about 2 hours. Upon complete Mg-halogen exchange, a solution of Sulfonimidoyl fluoride **S6a** (107.3 mg, 0.375 mmol, 1.5 eq.) in THF (0.5 mL) was added, workup procedure as described in Method 2.

Purified by silica gel column chromatography using DCM/acetone (0% to 6% acetone gradient) to give the product (77.8 mg, 0.155 mmol, 62% yield) as a colorless crystalline solid.

**Physical characteristics:** Colorless crystalline solid.

**TLC:**  $R_f = 0.72$  (DCM/acetone, 10% acetone).

**$^1\text{H}$  NMR:** (500 MHz,  $\text{CDCl}_3$ )  $\delta$  7.98 – 7.93 (m, 2H), 7.90 – 7.86 (m, 2H), 7.57 – 7.53 (m, 1H), 7.50 (dd,  $J = 8.3, 6.6$  Hz, 2H), 7.44 – 7.40 (m, 2H), 7.36 (s, 5H), 5.13 (d,  $J = 3.5$  Hz, 2H), 4.30 (br, 1H), 3.90 (br, 1H), 1.36 – 1.32 (m, 6H), 1.19 (t,  $J = 7.4$  Hz, 6H) ppm.

**$^{13}\text{C}$  NMR:** (126 MHz,  $\text{CDCl}_3$ )  $\delta$  172.8, 158.5, 153.6, 143.5, 140.4, 134.8, 133.1, 129.5, 129.5, 129.3, 129.2, 129.0, 128.9, 128.5, 128.4, 128.2, 127.8, 70.4, 47.2, 45.4, 21.6, 20.7 ppm.

**Specific rotation:**  $[\alpha]_D^{23} = +8.57$  (c 1.00, CHCl<sub>3</sub>)

**Melting Point:** 192-193 °C

**HRMS:** Calc'd for C<sub>29</sub>H<sub>31</sub>N<sub>2</sub>O<sub>4</sub>S<sup>+</sup> [M+H<sup>+</sup>] 503.2000; found 503.2006.

**Enantiomeric excess:** >99% ee.

**HPLC Conditions:** Daicel Chiralpak IC column, 70:30 *n*-hexane:*i*-PrOH, flow rate: 1 mL min<sup>-1</sup>, 25 °C, UV detection wavelength: 220 nm, retention time: minor: 19.7 min, major: 22.6 min.

**CCDC deposition Number:** 22243809

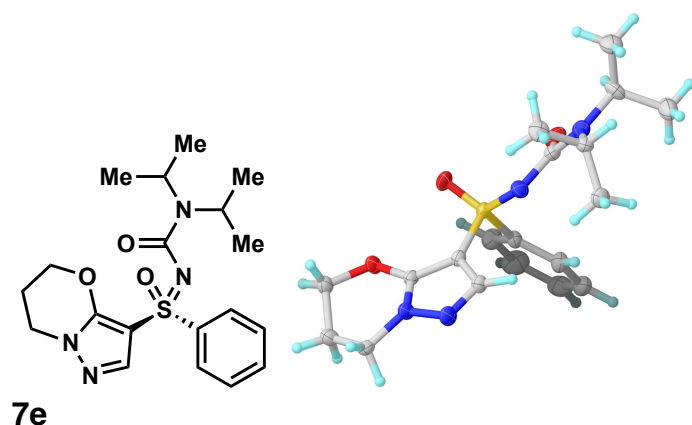

GP-8 was followed with additional modifications mentioned: 3-iodo-6,7-dihydro-5H-pyrazolo[5,1-b][1,3]oxazine (62.5 mg, 0.25 mmol) in 0.5 mL dry THF was added at 0 °C dropwise to the stirring isopropylmagnesium chloride lithium chloride complex solution (0.21 mL, 0.275 mmol, 1.1 eq. 1.3 M in THF) which was slowly warmed to room temperature (exchange takes about 6 hours, turning into a white emulsion). Then a solution of Sulfonimidoyl fluoride **S6a** (0.25 mmol, 1 eq.) in THF (0.25 mL) was added. Purified by silica gel column chromatography using DCM/acetone (0% to 15% acetone gradient) to give the product (87.7 mg, 0.225 mmol, 90% yield) as a white crystalline solid.

**Physical characteristics:** White crystalline solid.

**TLC:** R<sub>f</sub> = 0.46 (hexane/EtOAc, 50% EtOAc).

**<sup>1</sup>H NMR:** (500 MHz, CDCl<sub>3</sub>) δ 7.94 – 7.90 (m, 2H), 7.64 (s, 1H), 7.49 – 7.41 (m, 3H), 4.29 (dddd, *J* = 36.7, 11.1, 6.6, 4.0 Hz, 2H, overlay with br, 1H), 4.05 (t, *J* = 6.2 Hz, 2H), 3.85 (br, 1H), 2.25 – 2.13 (m, 2H), 1.28 (d, *J* = 6.9 Hz, 6H), 1.17 (t, *J* = 8.2 Hz, 6H) ppm.

**<sup>13</sup>C NMR:** (126 MHz, CDCl<sub>3</sub>) δ 158.7, 149.7, 142.9, 138.9, 132.1, 129.0, 126.8, 102.2, 66.6, 46.9, 45.0, 44.4, 21.4, 21.4, 21.0, 20.8, 20.7 ppm.

**Specific rotation:**  $[\alpha]_D^{23} = +4.55$  (c 1.00, CHCl<sub>3</sub>)

**Melting Point:** 124-125 °C

**HRMS:** Calc'd for C<sub>19</sub>H<sub>27</sub>N<sub>4</sub>O<sub>3</sub>S<sup>+</sup> [M+H<sup>+</sup>] 391.1798; found 391.1793.

**Enantiomeric excess:** >99% ee.

**HPLC Conditions:** Daicel Chiralpak IB column, 90:10 *n*-hexane:*i*-PrOH, flow rate: 1 mL min<sup>-1</sup>, 25 °C, UV detection wavelength: 220 nm, retention time: minor: 34.3 min, major: 42.6 min.

**CCDC deposition Number:** 2243805

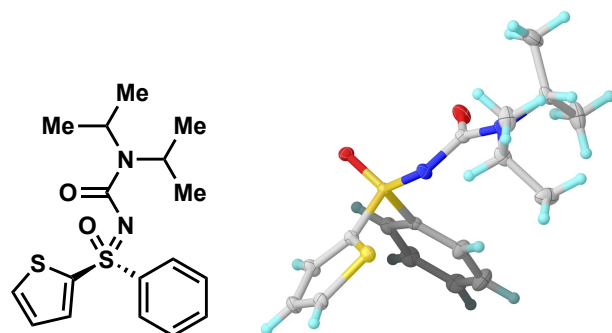

**7f**

GP-8 was followed with additional modifications mentioned: Commercially available 2-bromothiophene (0.25 mmol, 1 eq.) was added at room temperature in one portion to a stirring isopropylmagnesium chloride lithium chloride complex solution (0.21 mL, 0.275 mmol, 1.1 eq. 1.3 M in THF) (exchange takes about 12 hours) then cooled to 0 °C. A solution of Sulfonimidoyl fluoride **S6a** (0.25 mmol, 1 eq.) in THF (0.25 mL) was added dropwise at 0 °C then warmed to room temperature. Work-up procedure as described in GP-8. Purified by silica gel column chromatography using hexane/EtOAc (0% to 50% EtOAc gradient) to give the product (81.4 mg, 0.233 mmol, 93% yield) as a light-pink crystalline solid.

**Physical characteristics:** Light-pink crystalline solid

**TLC:**  $R_f$  = 0.46 (hexane/EtOAc, 50% EtOAc).

**<sup>1</sup>H NMR:** (500 MHz, CDCl<sub>3</sub>)  $\delta$  7.99 – 7.95 (m, 2H), 7.59 (d,  $J$  = 4.4 Hz, 2H), 7.53 – 7.46 (m, 3H), 7.04 (t,  $J$  = 4.4 Hz, 1H), 4.09 (br, 2H), 1.29 (s, 12H) ppm.

**<sup>13</sup>C NMR:** (126 MHz, CDCl<sub>3</sub>)  $\delta$  158.4, 142.4, 142.1, 133.7, 133.1, 132.6, 129.4, 128.2, 127.3, 45.8, 21.1 ppm.

**Specific rotation:**  $[\alpha]_D^{23} = +61.32$  (c 1.00, CHCl<sub>3</sub>)

**Melting Point:** 177-179 °C

**HRMS:** Calc'd for C<sub>17</sub>H<sub>23</sub>N<sub>2</sub>O<sub>2</sub>S<sub>2</sub><sup>+</sup> [M+H<sup>+</sup>] 351.1195; found 351.1189.

**Enantiomeric excess:** >99% ee.

**HPLC Conditions:** Daicel Chiralpak IC column, 70:30 *n*-hexane:*i*-PrOH, flow rate: 1 mL min<sup>-1</sup>, 25 °C, UV detection wavelength: 254 nm, retention time: minor: 25.9 min, major: 29.9 min.

**CCDC deposition Number:** 2243806

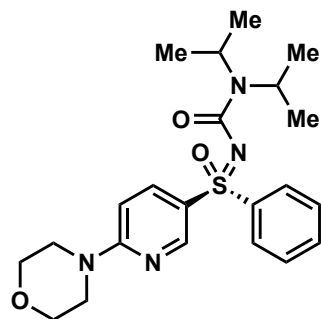

**7g**

GP-8 was followed with additional changes mentioned: 4-(5-bromopyridin-2-yl)morpholine (60.5 mg, 0.25 mmol, 1 eq.) in 0.3 mL dry THF was added at room temperature in one portion to the stirring isopropylmagnesium chloride lithium chloride complex solution (0.38 mL, 0.5 mmol, 2 eq. 1.3 M in THF) at 0 °C then warmed to room temperature where it stirred for 12 hours (reaction mixture turned turbid orange). Upon complete Mg-halogen exchange, a solution of Sulfonimidoyl fluoride **S6a** (107.3 mg, 0.375 mmol, 1.5 eq.) in THF (0.5 mL) was added at 0 °C then warmed to room temperature while monitoring by TLC. Work-up conditions were the same as described in GP-8.

Purified by silica gel column chromatography using DCM/acetone (0% to 9% acetone gradient) to give the product (64.5 mg, 0.15 mmol, 60% yield) as a colorless crystalline solid.

**Physical characteristics:** Colorless crystalline solid.

**TLC:**  $R_f$  = 0.2 (hexane/EtOAc, 50% EtOAc, light purple spot under 254 nm UV).

**<sup>1</sup>H NMR:** (500 MHz, CDCl<sub>3</sub>)  $\delta$  8.66 (d,  $J$  = 2.5 Hz, 1H), 7.91 (dd,  $J$  = 8.0, 1.8 Hz, 2H), 7.88 (dd,  $J$  = 9.1, 2.6 Hz, 1H), 7.51 – 7.43 (m, 3H), 6.58 (d,  $J$  = 9.2 Hz, 1H), 4.29 (s, 1H), 3.94 (s, 1H), 3.76 – 3.73 (m, 4H), 3.60 (dd,  $J$  = 5.8, 4.1 Hz, 4H), 1.35 (d,  $J$  = 6.9 Hz, 6H), 1.19 (t,  $J$  = 7.9 Hz, 6H) ppm.

**<sup>13</sup>C NMR:** (126 MHz, CDCl<sub>3</sub>)  $\delta$  160.1, 158.7, 148.7, 142.3, 136.8, 132.3, 129.3, 127.1, 124.9, 105.8, 66.5, 46.9, 45.2, 44.9, 21.6, 20.8 ppm.

**Specific rotation:**  $[\alpha]_D^{23}$  = 21.08 (c 1.00, CHCl<sub>3</sub>)

**Melting Point:** 118-120 °C

**HRMS:** Calc'd for C<sub>22</sub>H<sub>31</sub>N<sub>4</sub>O<sub>3</sub>S<sup>+</sup> [M+H<sup>+</sup>] 431.2111; found 431.2101.

**Enantiomeric excess:** >99% ee.

**HPLC Conditions:** Daicel Chiralpak IB column, 90:10 *n*-hexane:*i*-PrOH, flow rate: 1 mL min<sup>-1</sup>, 25 °C, UV detection wavelength: 220 nm, retention time: minor: 34.6 min, major: 38.7 min.

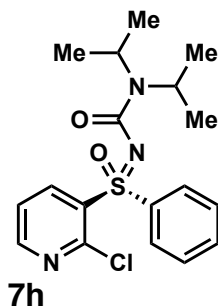

GP-8 was followed and additional changes mentioned: A solution of isopropylmagnesium chloride lithium chloride complex solution (0.21 mL, 0.275 mmol, 1.1 eq. 1.3 M in THF) was added dropwise at -40 °C, to a solution of commercially available 3-iodo-2-chloropyridine (52.9 mg, 0.275 mmol, 1.1 eq.) in 0.25 mL dry THF. Upon gradual warming up to 0 °C over 1 hour, the reaction mixture turned yellow, then a solution of Sulfonimidoyl fluoride **S6a** (0.25 mmol, 1 eq.) in THF (0.25 mL) was added, workup procedure as described in GP-8.

Purified by silica gel column chromatography using DCM/acetone (0% to 9% acetone gradient) to give the product (70.2 mg, 0.185 mmol, 74% yield) as a light-yellow amorphous solid.

**Physical characteristics:** Light-yellow amorphous solid.

**TLC:**  $R_f$  = 0.73 (DCM/acetone, 10% acetone).

**$^1\text{H}$  NMR:** (500 MHz,  $\text{CDCl}_3$ )  $\delta$  8.77 (dd,  $J$  = 7.9, 1.9 Hz, 1H), 8.46 (dd,  $J$  = 4.7, 1.9 Hz, 1H), 8.08 – 7.98 (m, 2H), 7.60 (t,  $J$  = 7.4 Hz, 1H), 7.55 – 7.45 (m, 3H), 4.38 (br, 1H), 3.84 (br, 1H), 1.34 (d,  $J$  = 7.0 Hz, 6H), 1.20 (dd,  $J$  = 21.1, 6.9 Hz, 6H) ppm.

**$^{13}\text{C}$  NMR:** (126 MHz,  $\text{CDCl}_3$ )  $\delta$  157.9, 152.5, 146.9, 141.2, 137.5, 137.3, 133.7, 129.1, 129.1, 123.5, 47.4, 45.4, 21.5, 21.4, 20.7, 20.5 ppm.

**Specific rotation:**  $[\alpha]_D^{23} = -60.07$  (c 1.00,  $\text{CHCl}_3$ )

**Melting Point:** 96-97 °C

**HRMS:** Calc'd for  $\text{C}_{18}\text{H}_{23}\text{ClN}_3\text{O}_2\text{S}^+$   $[\text{M}+\text{H}^+]$  380.1194; found 380.1188.

**Enantiomeric excess:** 98.7 % ee.

**HPLC Conditions:** Daicel Chiralpak IC column, 70:30 *n*-hexane:*i*-PrOH, flow rate: 1 mL min<sup>-1</sup>, 25 °C, UV detection wavelength: 254 nm, retention time: minor: 15.0 min, major: 18.1 min.

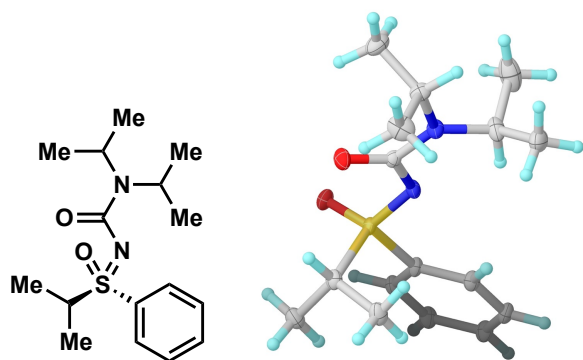

7i

GP-7 was followed with no additional change: Sulfonimidoyl fluoride **S6a** (0.25 mmol, 1 eq.) and commercially available isopropylmagnesium chloride from Sigma-Aldrich were used.

Purified by silica gel column chromatography using hexane/EtOAc (0% to 50% EtOAc gradient) to give the product (69.8 mg, 0.225 mmol, 90% yield) as a white amorphous solid.

GP-8 was used with no additional change: Sulfonimidoyl fluoride **S6a** (0.25 mmol, 1 eq.) and commercially available isopropylmagnesium chloride lithium chloride complex solution (1.3 M in THF) from Sigma-Aldrich. Purified by silica gel column chromatography using hexane/EtOAc (0% to 50% EtOAc gradient) to give the product (73.6 mg, 0.237 mmol, 95% yield) as a white amorphous solid.

GP-12 was followed with no additional change: Sulfonimidoyl fluoride **S6a** (0.25 mmol, 1 eq.) and commercially available isopropylmagnesium chloride lithium chloride complex solution (0.385 mL, 2 eq., 1.3 M in THF) from Sigma-Aldrich were used to provide (53 mg, 171 mmol, 68% yield) as white amorphous solid.

**Physical characteristics:** White amorphous solid.

**TLC:**  $R_f$  = 0.44 (hexane/EtOAc, 50% EtOAc).

**$^1\text{H}$  NMR:** (500 MHz,  $\text{CDCl}_3$ )  $\delta$  7.83 – 7.80 (m, 2H), 7.61 – 7.57 (m, 1H), 7.53 (dd,  $J$  = 8.5, 6.7 Hz, 2H), 4.05 (d,  $J$  = 70.6 Hz, 2H), 3.58 (pd,  $J$  = 6.9, 1.0 Hz, 1H), 1.36 – 1.13 (m, 18H) ppm.

**$^{13}\text{C}$  NMR:** (126 MHz,  $\text{CDCl}_3$ )  $\delta$  159.2, 136.2, 132.9, 129.1, 128.9, 56.1, 46.5, 45.2, 21.6, 20.8, 16.0, 15.9 ppm.

**Specific rotation:**  $[\alpha]_D^{23} = +6.00$  (c 1.00,  $\text{CHCl}_3$ )

**Melting Point:** 99-110 °C

**HRMS:** Calc'd for  $\text{C}_{16}\text{H}_{27}\text{N}_2\text{O}_2\text{S}^+$   $[\text{M}+\text{H}^+]$  311.1788; found 311.1779.

**Enantiomeric excess:** >99% ee.

**HPLC Conditions:** Daicel Chiralpak IC column, 70:30 *n*-hexane:*i*-PrOH, flow rate: 1 mL min<sup>-1</sup>, 25 °C, UV detection wavelength: 220 nm, retention time: minor: 20.2 min, major: 23.3 min.

CCDC deposition Number: 2243802

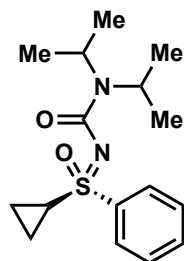

7j

GP-7 was followed with no additional change: Sulfonimidoyl fluoride **S6a** (0.25 mmol, 1 eq.) and commercially available cyclopropylmagnesium chloride from Sigma-Aldrich were used.

Purified by silica gel column chromatography using hexane/EtOAc (0% to 50% EtOAc gradient) to give the product (75.4 mg, 0.245 mmol, 98% yield) as a white amorphous solid.

**Physical characteristics:** White amorphous solid.

**TLC:**  $R_f$  = 0.4 (hexane/EtOAc, 50% EtOAc).

**$^1\text{H}$  NMR:** (500 MHz,  $\text{CDCl}_3$ )  $\delta$  7.82 (dd,  $J$  = 7.2, 1.9 Hz, 2H), 7.57 – 7.53 (m, 1H), 7.50 (dd,  $J$  = 8.3, 6.4 Hz, 2H), 4.07 (br, 1H), 3.92 (br, 1H), 2.51 (tt,  $J$  = 8.0, 4.8 Hz, 1H), 1.47 (ddt,  $J$  = 10.2, 7.3, 5.0 Hz, 1H), 1.32 – 1.20 (m, 7H), 1.18 – 1.07 (m, 7H), 0.90 (dtd,  $J$  = 9.1, 7.5, 5.2 Hz, 1H) ppm.

**$^{13}\text{C}$  NMR:** (126 MHz,  $\text{CDCl}_3$ )  $\delta$  158.7, 140.9, 132.6, 129.3, 127.2, 46.5, 45.1, 33.9, 21.6, 20.7, 6.7, 5.4 ppm.

**Specific rotation:**  $[\alpha]_D^{23} = +21.43$  (c 1.00,  $\text{CHCl}_3$ )

**Melting Point:** 80-81 °C

**HRMS:** Calc'd for  $\text{C}_{16}\text{H}_{25}\text{N}_2\text{O}_2\text{S}^+$   $[\text{M}+\text{H}^+]$  309.1632; found 309.1632.

**Enantiomeric excess:** >99% ee.

**HPLC Conditions:** Daicel Chiralpak IC column, 70:30 *n*-hexane:*i*-PrOH, flow rate: 1 mL min<sup>-1</sup>, 25 °C, UV detection wavelength: 220 nm, retention time: minor: 18.7 min, major: 22.2 min.

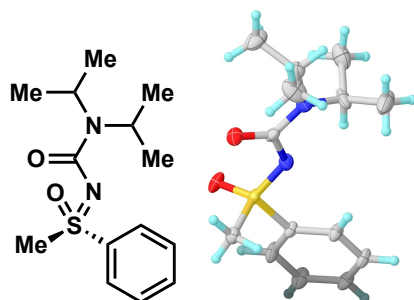

7k

GP-7 was followed with no additional change: Sulfonimidoyl fluoride **S6a** (0.25 mmol, 1 eq.) and commercially available methylmagnesium bromide from Sigma-Aldrich were used. Purified by silica gel column chromatography using hexane/EtOAc (0% to 50% EtOAc gradient) to give the product (64.2 mg, 0.227 mmol, 91% yield) as a white crystalline solid.

GP-12 was followed with no additional change: Sulfonimidoyl fluoride **S6a** (0.25 mmol, 1 eq.) and commercially available methylmagnesium chloride (0.50 mmol, 2 eq.) from Sigma-Aldrich were used to provide (52 mg, 184 mmol, 74% yield) as white crystalline solid.

**Physical characteristics:** White crystalline solid.

**TLC:**  $R_f$  = 0.3 (hexane/EtOAc, 33% EtOAc).

**$^1\text{H}$  NMR:** (500 MHz,  $\text{CDCl}_3$ )  $\delta$  7.96 – 7.91 (m, 2H), 7.63 – 7.59 (m, 1H), 7.57 – 7.52 (m, 2H), 4.15 (s, 1H), 3.91 (s, 1H), 3.30 (s, 3H), 1.29 – 1.16 (m, 12H) ppm.

**$^{13}\text{C}$  NMR:** (126 MHz,  $\text{CDCl}_3$ )  $\delta$  159.1, 140.4, 133.1, 129.4, 127.2, 46.8, 45.1, 44.9, 21.5, 21.4, 20.8 ppm.

**Specific rotation:**  $[\alpha]_D^{23} = -14.51$  (c 1.00,  $\text{CHCl}_3$ )

**Melting Point:** 169-170 °C

**HRMS:** Calc'd for  $\text{C}_{14}\text{H}_{23}\text{N}_2\text{O}_2\text{S}^+$   $[\text{M}+\text{H}^+]$  283.1475; found 283.1474.

**Enantiomeric excess:** >99% ee.

**HPLC Conditions:** Daicel Chiralpak IC column, 70:30 *n*-hexane:*i*-PrOH, flow rate: 1 mL min<sup>-1</sup>, 25 °C, UV detection wavelength: 220 nm, retention time: major: 18.7 min, minor: 29.9 min.

**CCDC deposition Number:** 2243799

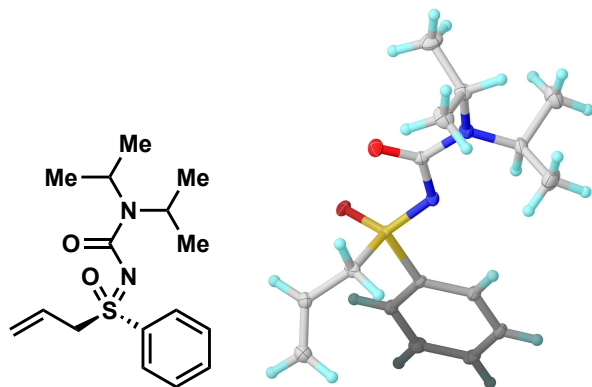

7l

GP-7 was followed with additional changes mentioned: Allylmagnesium bromide prepared following literature procedure<sup>12</sup> and added dropwise to a solution of Sulfonimidoyl fluoride **S6a** (0.25 mmol, 1 eq.) at -78 °C over 5 minutes to give a gold

solution, reaction completed after 1 hour at -78 °C and quenched with MeOH. Purified by silica gel column chromatography using hexane/EtOAc (0% to 50% EtOAc gradient) to give the product (76 mg, 0.247 mmol, 98 % yield) as a white crystalline solid.

**Physical characteristics:** White crystalline solid.

**TLC:**  $R_f$  = 0.53 (hexane/EtOAc, 50% EtOAc).

**$^1\text{H}$  NMR:** (500 MHz,  $\text{CDCl}_3$ )  $\delta$  7.86 (dd,  $J$  = 7.4, 1.7 Hz, 2H), 7.61 – 7.56 (m, 1H), 7.51 (dd,  $J$  = 8.5, 7.0 Hz, 2H), 5.64 (ddt,  $J$  = 17.5, 10.2, 7.5 Hz, 1H), 5.23 (d,  $J$  = 10.1 Hz, 1H), 5.03 (dd,  $J$  = 17.1, 1.6 Hz, 1H), 4.40 (dd,  $J$  = 13.6, 7.5 Hz, 1H), 4.18 (s, 1H), 4.10 (dd,  $J$  = 13.6, 7.4 Hz, 1H), 3.89 (s, 1H), 1.23 (d,  $J$  = 6.8 Hz, 12H) ppm.

**$^{13}\text{C}$  NMR:** (126 MHz,  $\text{CDCl}_3$ )  $\delta$  159.1, 137.4, 133.3, 129.1, 129.0, 128.5, 125.2, 124.6, 60.4, 47.0, 45.1, 21.4, 20.8 ppm.

**Specific rotation:**  $[\alpha]_D^{23} = -99.33$  (c 1.00,  $\text{CHCl}_3$ )

**Melting Point:** 79-80 °C

**HRMS:** Calc'd for  $\text{C}_{16}\text{H}_{25}\text{N}_2\text{O}_2\text{S}^+$   $[\text{M}+\text{H}^+]$  309.1632; found 309.1632.

**Enantiomeric excess:** >99% ee.

**HPLC Conditions:** Daicel Chiralpak IC column, 70:30 *n*-hexane:*i*-PrOH, flow rate: 1 mL min<sup>-1</sup>, 25 °C, UV detection wavelength: 220 nm, retention time: major: 16.6 min, minor: 21.7 min.

**CCDC deposition Number:** 2243807

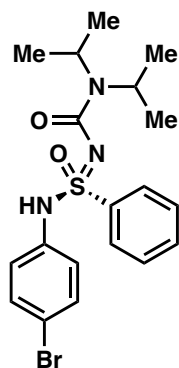

**8a**

GP-9 was followed with no additional change: Commercially available 4-bromoaniline (1.0 eq, 0.25 mmol) was used. NaHMDS (2.0 eq) was used as base. Purified by silica gel column chromatography using hexane/EtOAc (0% to 35% EtOAc gradient) to give the product (89 mg, 203  $\mu\text{mol}$ , 81% yield) as a white solid.

**Physical characteristics:** White amorphous solid.

**TLC:**  $R_f$  = 0.6 (hexane/EtOAc, 50% EtOAc).

**$^1\text{H}$  NMR:** (500 MHz,  $\text{CDCl}_3$ )  $\delta$  11.17 (s, 1H), 7.82 (dd,  $J$  = 7.8, 1.7 Hz, 2H), 7.53 – 7.46 (m, 1H), 7.42 (dd,  $J$  = 8.5, 7.1 Hz, 2H), 7.32 – 7.27 (m, 2H), 7.01 – 6.95 (m, 2H), 4.32 (s, 1H), 3.86 (s, 1H), 1.33 (d,  $J$  = 6.8 Hz, 6H), 1.15 (d,  $J$  = 6.9 Hz, 6H) ppm.

**<sup>13</sup>C NMR:** (126 MHz, CDCl<sub>3</sub>) δ 157.7, 140.7, 136.1, 132.9, 132.4, 129.2, 127.0, 118.0, 47.4, 45.5, 21.2, 21.1, 20.9, 20.8 ppm.

**Specific rotation:**  $[\alpha]_D^{23} = -128.38$  (c 1.00, CHCl<sub>3</sub>)

**HRMS:** Calc'd for C<sub>19</sub>H<sub>25</sub>BrN<sub>3</sub>O<sub>2</sub>S [M+H<sup>+</sup>] 438.0845; found 438.0852.

**Enantiomeric excess:** >99% ee.

**HPLC Conditions:** Daicel Chiralpak IC column, 70:30 *n*-hexane:*i*-PrOH, flow rate: 1 mL min<sup>-1</sup>, 25 °C, UV detection wavelength: 220 nm, retention time: minor: 4.9 min, major: 5.4 min.

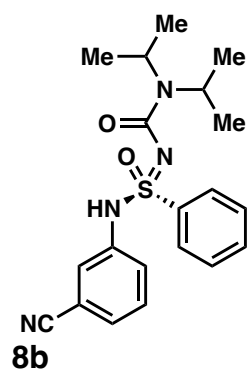

GP-9 was followed with no additional change: Commercially available 3-aminobenzonitrile (1.0 eq., 0.25 mmol) was used. NaHMDS (2.0 eq) was used as base. Purified by silica gel column chromatography using hexane/EtOAc (0% to 30% EtOAc gradient) to give the product (83 mg, 216 μmol, 86% yield) as a white amorphous solid.

**Physical characteristics:** White amorphous solid.

**TLC:** R<sub>f</sub> = 0.28 (hexane/EtOAc, 25% EtOAc).

**<sup>1</sup>H NMR:** (500 MHz, CDCl<sub>3</sub>) δ 7.85 (dd, *J* = 7.5, 1.8 Hz, 2H), 7.53 (dd, *J* = 8.4, 6.4 Hz, 1H), 7.46 (t, *J* = 7.7 Hz, 2H), 7.37 (d, *J* = 2.2 Hz, 1H), 7.34 – 7.26 (m, 3H), 4.31 (s, 1H), 3.85 (s, 1H), 1.33 (d, *J* = 6.9 Hz, 6H), 1.15 (d, *J* = 6.6 Hz, 6H) ppm.

**<sup>13</sup>C NMR:** (126 MHz, CDCl<sub>3</sub>) δ 157.5, 140.5, 138.3, 133.2, 130.3, 129.4, 127.9, 126.9, 125.4, 123.9, 118.2, 113.4, 47.4, 45.6, 21.1, 21.0, 20.9, 20.8 ppm.

**Specific rotation:**  $[\alpha]_D^{23} = -153.17$  (c 1.00, CHCl<sub>3</sub>)

**HRMS:** Calc'd for C<sub>20</sub>H<sub>25</sub>N<sub>4</sub>O<sub>2</sub>S [M+H<sup>+</sup>] 385.1693; found 385.1690.

**Enantiomeric excess:** >99% ee.

**HPLC Conditions:** Daicel Chiralpak IC column, 70:30 *n*-hexane:*i*-PrOH, flow rate: 1 mL min<sup>-1</sup>, 25 °C, UV detection wavelength: 220 nm, retention time: minor: 8.7 min, major: 9.3 min.

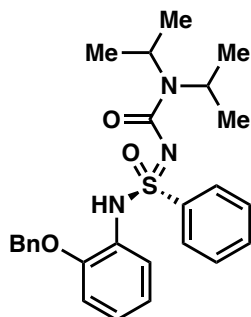

**8c**

GP-9 was followed with no additional change: Commercially available 2-(benzyloxy)aniline (1.0 eq) was used. NaHMDS (2.0 eq) was used as base. Purified by silica gel column chromatography using hexane/EtOAc (0% to 20% EtOAc gradient) to give the product (104 mg, 223  $\mu$ mol, 89% yield) as a colorless oil, which solidified to a white amorphous solid.

**Physical characteristics:** White amorphous solid.

**TLC:**  $R_f$  = 0.36 (hexane/EtOAc, 20% EtOAc).

**$^1\text{H}$  NMR:** (500 MHz,  $\text{CDCl}_3$ )  $\delta$  11.16 (s, 1H), 7.82 (dd,  $J$  = 7.8, 1.6 Hz, 2H), 7.60 – 7.53 (m, 2H), 7.46 (dd,  $J$  = 8.4, 1.6 Hz, 1H), 7.44 – 7.35 (m, 3H), 7.35 – 7.27 (m, 3H), 6.96 (td,  $J$  = 7.8, 1.6 Hz, 1H), 6.82 (t,  $J$  = 7.4 Hz, 2H), 5.10 (d,  $J$  = 12.1 Hz, 1H), 4.98 (d,  $J$  = 12.2 Hz, 1H), 4.40 (s, 1H), 3.79 (s, 1H), 1.36 (dd,  $J$  = 7.0, 3.6 Hz, 6H), 1.14 (dd,  $J$  = 21.3, 6.8 Hz, 6H) ppm.

**$^{13}\text{C}$  NMR:** (126 MHz,  $\text{CDCl}_3$ )  $\delta$  157.4, 149.1, 141.4, 136.6, 132.4, 128.8, 128.6, 127.8, 127.0, 126.9, 126.8, 125.0, 122.1, 121.3, 112.3, 70.4, 47.4, 45.3, 21.2, 21.1, 21.0, 20.9 ppm.

**Specific rotation:**  $[\alpha]_D^{23} = +6.49$  (c 1.00,  $\text{CHCl}_3$ )

**HRMS:** Calc'd for  $\text{C}_{26}\text{H}_{32}\text{N}_3\text{O}_3\text{S}$   $[\text{M}+\text{H}^+]$  466.2159; found 466.2154.

**Enantiomeric excess:** >99% ee.

**HPLC Conditions:** Daicel Chiralpak IC column, 70:30 *n*-hexane:*i*-PrOH, flow rate: 1 mL min<sup>-1</sup>, 25 °C, UV detection wavelength: 220 nm, retention time: minor: 6.3 min, major: 7.1 min.

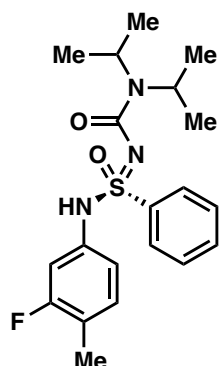

## 8d

GP-9 was followed with no additional change: Commercially available 3-fluoro-4-methylaniline (1.0 eq, 0.2 mmol) was used. NaHMDS (2.0 eq) was used as base. Purified by silica gel column chromatography using hexane/EtOAc (0% to 20% EtOAc gradient) to give the product (68 mg, 174  $\mu$ mol, 69% yield) as a colorless oil.

**Physical characteristics:** Colorless oil.

**TLC:**  $R_f$  = 0.36 (hexane/EtOAc, 20% EtOAc).

**$^1\text{H}$  NMR:** (500 MHz,  $\text{CDCl}_3$ )  $\delta$  7.83 (dd,  $J$  = 7.6, 1.8 Hz, 2H), 7.49 (t,  $J$  = 7.4 Hz, 1H), 7.42 (t,  $J$  = 7.7 Hz, 2H), 6.96 (t,  $J$  = 8.3 Hz, 1H), 6.82 (dd,  $J$  = 10.8, 2.2 Hz, 1H), 6.75 (dd,  $J$  = 8.1, 2.2 Hz, 1H), 4.32 (s, 1H), 3.98 – 3.77 (m, 1H), 2.13 (s, 3H), 1.33 (d,  $J$  = 6.9 Hz, 6H), 1.15 (d,  $J$  = 6.9 Hz, 6H) ppm.

**$^{13}\text{C}$  NMR:** (126 MHz,  $\text{CDCl}_3$ )  $\delta$  162.3, 160.3, 157.9, 140.9, 135.9 (d,  $J$  = 10.2 Hz), 132.9, 131.9 (d,  $J$  = 6.3 Hz), 129.2, 127.1, 121.4 (d,  $J$  = 17.4 Hz), 117.4 (d,  $J$  = 3.4 Hz), 109.1 (d,  $J$  = 25.8 Hz), 47.4, 45.6, 21.3, 21.2, 21.0, 20.9, 14.2 (d,  $J$  = 3.2 Hz) ppm.

**$^{19}\text{F}$  NMR:** (471 MHz,  $\text{CDCl}_3$ )  $\delta$  -115.20 ppm.

**Specific rotation:**  $[\alpha]_D^{23}$  = -135.45 (c 1.00,  $\text{CHCl}_3$ )

**HRMS:** Calc'd for  $\text{C}_{20}\text{H}_{27}\text{FN}_3\text{O}_2\text{S}$   $[\text{M}+\text{H}^+]$  392.1803; found 392.1803.

**Enantiomeric excess:** >99% ee.

**HPLC Conditions:** Daicel Chiralpak IC column, 70:30 *n*-hexane:*i*-PrOH, flow rate: 1 mL min<sup>-1</sup>, 25 °C, UV detection wavelength: 220 nm, retention time: minor: 5.1 min, major: 5.6 min.

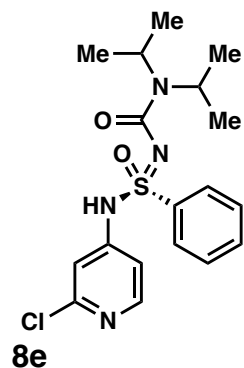

GP-9 was followed with additional changes mentioned: Commercially available 2-chloropyridin-4-amine (1.0 eq, 0.2 mmol) and NaHMDS (2.0 eq) were used. The reaction was quenched after stirring at room temperature for 1.5 hours. Purified by silica gel column chromatography using hexane/EtOAc (0% to 50% EtOAc gradient) to give the product (71 mg, 0.180 mmol, 90% yield) as a clear colorless oil.

**Physical characteristics:** Clear colorless oil.

**TLC:**  $R_f$  = 0.36 (hexane/EtOAc, 40% EtOAc).

**<sup>1</sup>H NMR:** (500 MHz, CDCl<sub>3</sub>) δ 12.54 (s, 1H), 8.10 (d, *J* = 5.6 Hz, 1H), 7.94 – 7.89 (m, 2H), 7.61 – 7.55 (m, 1H), 7.53 – 7.48 (m, 2H), 7.03 (d, *J* = 2.0 Hz, 1H), 6.91 (dd, *J* = 5.6, 2.0 Hz, 1H), 4.30 (s, 1H), 3.84 (s, 1H), 1.33 (d, *J* = 3.8 Hz, 6H), 1.14 (d, *J* = 3.5 Hz, 6H) ppm.  
**<sup>13</sup>C NMR:** (126 MHz, CDCl<sub>3</sub>) δ 157.1, 152.3, 150.2, 147.0, 140.3, 133.4, 129.4, 126.8, 113.0, 112.3, 47.4, 45.6, 21.0, 20.9, 20.8, 20.6 ppm.

**Specific rotation:**  $[\alpha]_D^{22.8} = -65.23$  (c 1.00, CHCl<sub>3</sub>)

**HRMS:** Calc'd for C<sub>18</sub>H<sub>23</sub>ClN<sub>4</sub>O<sub>2</sub>SNa [M+Na<sup>+</sup>] 417.1122; found 417.1122.

**Enantiomeric excess:** >99% ee.

**HPLC Conditions:** Daicel Chiralpak IC column, 70:30 *n*-hexane:*i*-PrOH, flow rate: 1 mL/min, 25 °C, UV detection wavelength: 254 nm, retention time: minor: 6.9 min, major: 12.7 min.

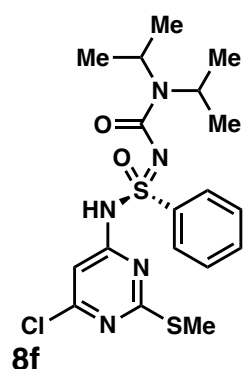

GP-9 was followed with additional changes mentioned: Commercially available 6-chloro-2-(methylthio)pyrimidin-4-amine (1.0 eq, 0.20 mmol) and NaHMDS (2.0 eq) were used. The reaction was quenched after stirring at room temperature for 1.5 hours. Purified by silica gel column chromatography using hexane/EtOAc (0% to 60% EtOAc gradient) to give the product (76 mg, 0.172 mmol, 86% yield) as a white amorphous solid.

**Physical characteristics:** White amorphous solid.

**TLC:** R<sub>f</sub> = 0.41 (hexane/EtOAc, 40% EtOAc).

**<sup>1</sup>H NMR:** (500 MHz, CDCl<sub>3</sub>) δ 9.06 (s, 1H), 8.00 – 7.95 (m, 2H), 7.60 – 7.57 (m, 1H), 7.54 – 7.50 (m, 2H), 6.59 (s, 1H), 4.39 – 4.16 (m, 1H), 4.00 – 3.78 (m, 1H), 2.36 (s, 3H), 1.35 – 1.12 (m, 12H) ppm.

**<sup>13</sup>C NMR:** <sup>13</sup>C NMR (126 MHz, CDCl<sub>3</sub>) δ 171.5, 164.2, 160.3, 141.0, 133.4, 129.3, 128.97, 127.1, 107.8, 47.4, 20.9, 20.8, 19.3, 14.1 ppm.

**Specific rotation:**  $[\alpha]_D^{23.3} = -4.62$  (c 1.00, CHCl<sub>3</sub>)

**HRMS:** Calc'd for C<sub>16</sub>H<sub>24</sub>ClN<sub>5</sub>O<sub>2</sub>S<sub>2</sub>Na [M+Na<sup>+</sup>] 464.0952; found 464.0957.

**Enantiomeric excess:** >99% ee.

**HPLC Conditions:** Daicel Chiralpak IC column, 70:30 *n*-hexane:*i*-PrOH, flow rate: 1 mL/min, 25 °C, UV detection wavelength: 220 nm, retention time: minor: 5.8 min, major: 8.4 min.

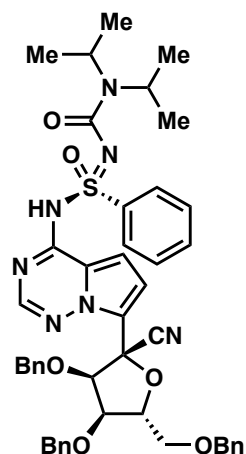

**8g**

GP-9 was followed with no additional change: Commercially available (2*R*,3*R*,4*R*,5*R*)-2-(4-aminopyrrolo[2,1-*f*][1,2,4]triazin-7-yl)-3,4-bis(benzyloxy)-5-((benzyloxy)methyl)tetrahydrofuran-2-carbonitrile (0.1 mmol, 1 eq.) and NaHMDS (2.0 eq) were used. Purified by silica gel column chromatography using hexane/EtOAc (0% to 35% EtOAc gradient) to give the product (66 mg, 79.7  $\mu$ mol, 80% yield) as a light-yellow amorphous solid.

**Physical characteristics:** light-yellow amorphous solid.

**TLC:**  $R_f$  = 0.67 (hexane/EtOAc, 40% EtOAc).

**$^1\text{H}$  NMR:** (500 MHz,  $\text{CDCl}_3$ )  $\delta$  8.15 (d,  $J$  = 7.6 Hz, 2H), 7.63 – 7.53 (m, 3H), 7.49 (s, 1H), 7.33 – 7.23 (m, 15H), 6.92 – 6.84 (m, 2H), 4.84 (s, 2H), 4.65 (d,  $J$  = 4.9 Hz, 1H), 4.57 – 4.46 (m, 4H), 4.37 (d,  $J$  = 12.0 Hz, 1H), 4.23 (s, 1H), 4.02 (t,  $J$  = 5.8 Hz, 1H), 3.93 (s, 1H), 3.76 (dd,  $J$  = 11.0, 3.5 Hz, 1H), 3.60 (dd,  $J$  = 11.0, 3.9 Hz, 1H), 1.34 (dd,  $J$  = 12.3, 6.8 Hz, 6H), 1.26 – 1.18 (m, 6H) ppm.

**$^{13}\text{C}$  NMR:** (126 MHz,  $\text{CDCl}_3$ )  $\delta$  160.1, 157.3, 146.1, 145.5, 143.3, 141.4, 138.0, 137.9, 137.5, 136.8, 135.7, 132.7, 132.2, 128.8, 128.7, 128.6, 128.4, 128.3, 128.3, 127.7, 127.6, 126.4, 126.1, 120.4, 116.3, 113.2, 107.8, 103.9, 82.1, 79.1, 78.4, 75.9, 73.3, 73.2, 73.1, 72.5, 72.2, 68.3, 47.5, 45.6, 21.0, 20.7 ppm.

**Specific rotation:**  $[\alpha]_D^{22.7} = +62.96$  (c 1.00,  $\text{CHCl}_3$ )

**HRMS:** Calc'd for  $\text{C}_{48}\text{H}_{50}\text{N}_7\text{O}_6\text{S}$   $[\text{M}+\text{H}^+]$  828.3538; found 828.3529.

**Diastereomeric excess:** >99% de, determined by  $^1\text{H}$  NMR. Comparison was made using the racemic starting material giving a mixture of diastereomers.

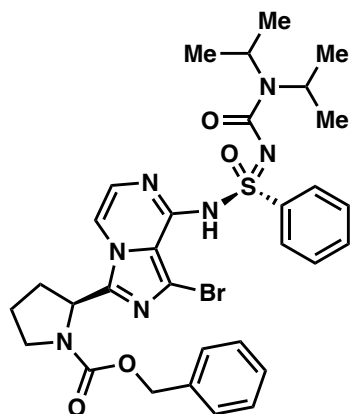

**8h**

GP-9 was followed with additional changes mentioned: Reaction scale changed to 0.20 mmol. Commercially available benzyl (2S)-2-[8-amino-1-bromoimidazo[1,5-a]pyrazin-3-yl]pyrrolidine-1-carboxylate (0.20 mmol, 1.0 eq) and NaHMDS (2.0 eq) were used. Purified by silica gel column chromatography using hexane/acetone (0% to 45% acetone gradient) to give the product (110 mg, 161  $\mu$ mol, 80% yield) as a white amorphous solid. *Note:* The starting material exists as a mixture of rotamers which is also observed in the sulfonimidamide product.

**Physical characteristics:** White amorphous solid.

**TLC:**  $R_f$  = 0.30 (hexane/acetone, 30% acetone).

**$^1\text{H}$  NMR:** (500 MHz, DMSO)  $\delta$  12.45 – 11.84 (m, 1H), 8.19 – 8.06 (m, 2H), 7.83 (d,  $J$  = 5.8 Hz, 0H, another diastereomer), 7.67 – 7.58 (m, 3H), 7.38 – 7.27 (m, 2H), 7.11 – 7.01 (m, 2H), 6.86 (d,  $J$  = 5.8 Hz, 1H), 6.76 (d,  $J$  = 7.0 Hz, 1H), 5.33 – 5.22 (m, 1H), 5.09 – 4.58 (m, 2H), 4.27 – 3.97 (m, 1H), 3.96 – 3.71 (m, 1H), 3.62 – 3.45 (m, 2H), 2.35 – 1.84 (m, 4H), 1.20 – 1.09 (m, 12H) ppm.

**$^{13}\text{C}$  NMR:** (126 MHz, DMSO)  $\delta$  159.2, 154.5, 153.7, 147.1, 147.0, 145.7, 145.6, 143.8, 143.7, 137.3, 136.5, 132.5, 129.3, 128.9, 128.5, 128.2, 128.2, 127.9, 127.7, 126.4, 117.6, 117.5, 116.9, 116.5, 108.1, 107.3, 66.5, 52.6, 51.9, 47.4, 46.8, 44.8, 32.9, 31.7, 24.6, 23.8, 21.5, 21.4, 21.3, 21.2 ppm. All rotameric carbons were reported.

**Specific rotation:**  $[\alpha]_D^{23}$  = -19.56 (c 1.00,  $\text{CHCl}_3$ )

**HRMS:** Calc'd for  $\text{C}_{31}\text{H}_{37}\text{BrN}_7\text{O}_4\text{S}$   $[\text{M}+\text{H}^+]$  682.1806; found 682.1810.

**Diastereomeric Excess:** >99 de, determined by  $^1\text{H}$ NMR. Comparison was made using the racemic starting material giving a mixture of diastereomers and associated rotamers.

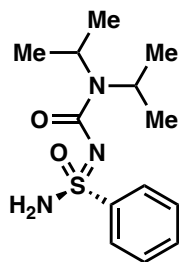

**8i**

GP-10 was followed with no additional change: Commercially available  $\text{NH}_4\text{Cl}$  (3.0 eq) was used as a nitrogen source.  $i\text{-PrMgCl-LiCl}$  (6.0 eq) was used as base.  $\text{NH}_4\text{Cl}$  and  $i\text{-PrMgClLiCl}$  were mixed at room temperature in THF (2.5 mL) and stirred the mixture for 30 min, Sulfonimidoyl fluoride **S6a** (0.25 mmol, 1 eq.) in THF (0.5 mL) was added to the reaction slowly. Purified by silica gel column chromatography using hexane/EtOAc (0% to 60% EtOAc gradient) to give the product (58 mg, 204  $\mu\text{mol}$ , 82% yield) as a white amorphous solid.

**Physical characteristics:** White amorphous solid.

**TLC:**  $R_f = 0.3$  (hexane/EtOAc, 50% EtOAc).

**$^1\text{H}$  NMR:** (500 MHz,  $\text{CDCl}_3$ )  $\delta$  7.95 (dd,  $J = 7.5, 1.7$  Hz, 2H), 7.58 – 7.52 (m, 1H), 7.49 (dd,  $J = 8.4, 6.7$  Hz, 2H), 6.50 (s, 2H), 4.29 (s, 1H), 3.81 (s, 1H), 1.29 – 1.15 (m, 12H) ppm.

**$^{13}\text{C}$  NMR:** (126 MHz,  $\text{CDCl}_3$ )  $\delta$  158.3, 143.3, 132.7, 129.1, 126.4, 47.2, 45.2, 21.3, 21.2, 20.9 ppm.

**Specific rotation:**  $[\alpha]_D^{23} = -24.24$  (c 1.00,  $\text{CHCl}_3$ )

**HRMS:** Calc'd for  $\text{C}_{13}\text{H}_{22}\text{N}_3\text{O}_2\text{S}$   $[\text{M}+\text{H}^+]$  284.1427; found 284.1427.

**Enantiomeric excess:** >99% ee.

**HPLC Conditions:** Daicel Chiralpak IC column, 70:30  $n\text{-hexane}:$  $i\text{-PrOH}$ , flow rate: 1 mL min $^{-1}$ , 25  $^\circ\text{C}$ , UV detection wavelength: 220 nm, retention time: major: 7.7 min, minor: 8.7 min.

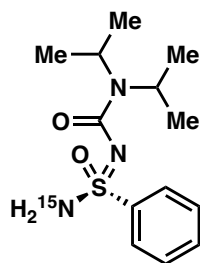

**8j**

GP-10 was followed with no additional change: Commercially available  $^{15}\text{NH}_4\text{Br}$  (3.0 eq) was used as a nitrogen source.  $i\text{-PrMgCl-LiCl}$  (6.0 eq) was used as base.  $^{15}\text{NH}_4\text{Br}$  and  $i\text{-PrMgClLiCl}$  were mixed at room temperature in THF (2.5 mL) and stirred the mixture for

30 min, Sulfonylimidoyl fluoride **S6a** (0.25 mmol, 1 eq.) in THF (0.5 mL) was added to the reaction slowly. Purified by silica gel column chromatography using hexane/EtOAc (0% to 60% EtOAc gradient) to give the product (58 mg, 204  $\mu$ mol, 82% yield) as a white solid.

**Physical characteristics:** White amorphous solid.

**TLC:**  $R_f$  = 0.3 (hexane/EtOAc, 50% EtOAc).

**$^1\text{H}$  NMR:** (500 MHz,  $\text{CDCl}_3$ )  $\delta$  7.99 – 7.90 (m, 2H), 7.54 (t,  $J$  = 4.6 Hz, 1H), 7.48 (td,  $J$  = 7.9, 7.5, 2.2 Hz, 2H), 6.53 (d,  $J$  = 53.6 Hz, 2H), 4.28 (s, 1H), 3.80 (s, 1H), 1.21 (dd,  $J$  = 32.2, 7.5 Hz, 12H) ppm.

**$^{13}\text{C}$  NMR:** (126 MHz,  $\text{CDCl}_3$ )  $\delta$  158.3, 143.3, 132.7, 129.1, 126.4, 47.3, 45.2, 21.3, 21.2, 20.9 ppm.

**Specific rotation:**  $[\alpha]_D^{23}$  = -22.10 (c 1.00,  $\text{CHCl}_3$ )

**HRMS:** Calc'd for  $\text{C}_{13}\text{H}_{22}\text{N}_2^{15}\text{NO}_2\text{S}$   $[\text{M}+\text{H}^+]$  285.1398; found 285.1398.

**Enantiomeric excess:** >99% ee.

**HPLC Conditions:** Daicel Chiralpak IC column, 70:30 *n*-hexane:*i*-PrOH, flow rate: 1 mL min<sup>-1</sup>, 25 °C, UV detection wavelength: 220 nm, retention time: minor: 7.4 min, major: 8.3 min.

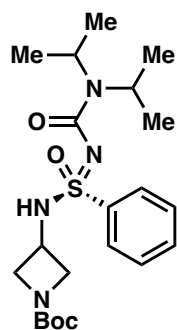

**8k**

GP-11 (LiBr) was followed with no addition change: Commercially available *tert*-butyl 3-aminoazetidine-1-carboxylate (1.0 eq. 0.1 mmol) was used. Heated the reaction at 60 °C for 13 hours. Purified by silica gel column chromatography using hexane/EtOAc (0% to 60% EtOAc gradient) to give the product (34.6 mg, 78.9  $\mu$ mol, 79% yield) as a clear colorless oil.

**Physical characteristics:** Clear colorless oil.

**TLC:**  $R_f$  = 0.41 (hexane/EtOAc, 50% EtOAc).

**$^1\text{H}$  NMR:** (500 MHz,  $\text{CDCl}_3$ )  $\delta$  8.79 (d,  $J$  = 8.8 Hz, 1H), 7.92 – 7.87 (m, 2H), 7.61 – 7.55 (m, 1H), 7.53 – 7.48 (m, 2H), 4.37 – 4.19 (m, 1H), 4.20 – 4.13 (m, 1H), 4.08 – 4.00 (m, 1H), 3.95 (dd,  $J$  = 9.1, 5.6 Hz, 1H), 3.91 – 3.79 (m, 1H), 3.78 – 3.72 (m, 1H), 3.54 (dd,  $J$  = 9.3, 5.7 Hz, 1H), 1.39 (s, 9H), 1.31 (d,  $J$  = 6.8 Hz, 6H), 1.15 (d,  $J$  = 6.9 Hz, 6H) ppm.

**$^{13}\text{C}$  NMR:**  $^{13}\text{C}$  NMR (126 MHz,  $\text{CDCl}_3$ )  $\delta$  157.9, 155.8, 141.0, 133.0, 129.2, 126.9, 79.9, 57.4, 47.2, 45.3, 41.5, 28.3, 21.1, 21.0, 20.8, 20.8 ppm.

**Specific rotation:**  $[\alpha]_D^{23} = -26.86$  (c 1.00, CHCl<sub>3</sub>)

**HRMS:** Calc'd for C<sub>21</sub>H<sub>34</sub>N<sub>4</sub>O<sub>4</sub>SNa [M+Na<sup>+</sup>] 461.2193; found 461.2195.

**Enantiomeric excess:** >99% ee.

**HPLC Conditions:** Daicel Chiralpak IC column, 70:30 *n*-hexane:*i*-PrOH, flow rate: 1 mL/min, 25 °C, UV detection wavelength: 254 nm, retention time: minor: 10.4 min, major: 13.5 min.

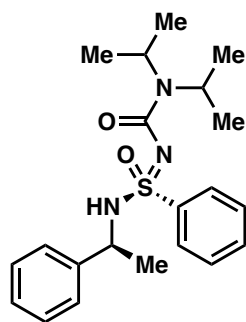

**8I**

GP-10 was followed with no additional change: commercially available (*S*)-1-phenylethan-1-amine (2 eq. 0.40 mmol) and Sulfonimidoyl fluoride **S6a** (0.20 mmol, 1 eq.) were used; deprotonation for 30 minutes. Purified by silica gel column chromatography using hexane/EtOAc (0% to 60% EtOAc gradient) to give the product (60 mg, 0.155 mmol, 77% yield) as a clear colorless oil that solidified upon standing.

**Physical characteristics:** Clear colorless oil.

**TLC:** R<sub>f</sub> = 0.2 (hexane/acetone, 20% acetone).

**<sup>1</sup>H NMR:** <sup>1</sup>H NMR (500 MHz, CDCl<sub>3</sub>) δ 8.42 (d, *J* = 6.5 Hz, 1H), 7.95 (dd, *J* = 7.7, 1.7 Hz, 2H), 7.58 – 7.53 (m, 1H), 7.52 – 7.47 (m, 2H), 7.36 – 7.27 (m, 4H), 7.25 – 7.20 (m, 1H), 4.40 (p, *J* = 6.8 Hz, 1H), 4.32 – 4.08 (m, 1H), 4.00 – 3.74 (m, 1H), 1.30 (d, *J* = 6.9 Hz, 3H), 1.34 – 1.23 (m, 6H), 1.19 – 1.06 (m, 6H) ppm.

**<sup>13</sup>C NMR:** (126 MHz, CDCl<sub>3</sub>) δ 158.1, 143.2, 142.1, 132.5, 129.0, 128.6, 127.4, 126.4, 52.8, 47.0, 45.2, 23.4, 21.3, 21.2, 20.9, 20.9. ppm.

**Specific rotation:**  $[\alpha]_D^{23.3} = -93.43$  (c 1.00, CHCl<sub>3</sub>)

**HRMS:** Calc'd for C<sub>21</sub>H<sub>30</sub>N<sub>3</sub>O<sub>2</sub>S [M+H<sup>+</sup>] 388.2053; found 388.2054.

**Diastereomeric excess:** >99% de, determined by <sup>1</sup>H NMR. Comparison was made using the racemic starting material giving a mixture of diastereomers.

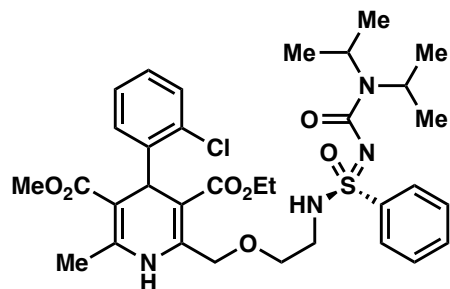

**8m**

GP-11 (LiBr) was followed with additional changes mentioned: Sulfonimidoyl fluoride **S6a** (1.1 eq., 0.11 mmol) was used. Commercially available *rac*-amlodipine (1 eq., 0.1 mmol) was used. The reaction was heated at 70 °C for 13 hours. Purified by silica gel column chromatography using hexane/EtOAc (0% to 35% EtOAc gradient) to give an inseparable mixture of diastereomers (47 mg, 69.6  $\mu$ mol, 70% yield) as a light-yellow oil.

**Physical characteristic:** Light-yellow oil.

**TLC:**  $R_f$  = 0.38 (hexane/EtOAc, 40% EtOAc).

**$^1\text{H}$  NMR:** (500 MHz,  $\text{CDCl}_3$ )  $\delta$  8.91 – 8.75 (m, 1H), 7.94 (d,  $J$  = 7.9 Hz, 2H), 7.61 – 7.55 (m, 1H), 7.54 – 7.39 (m, 4H), 7.22 (d,  $J$  = 7.9 Hz, 1H), 7.14 (q,  $J$  = 7.5 Hz, 1H), 7.04 (t,  $J$  = 7.6 Hz, 1H), 5.41 (d,  $J$  = 2.1 Hz, 1H), 4.79 – 4.59 (m, 2H), 4.32 – 4.10 (m, 1H), 4.09 – 3.98 (m, 2H), 3.98 – 3.79 (m, 1H), 3.73 – 3.64 (m, 1H), 3.62 (s, 3H), 3.58 – 3.51 (m, 1H), 3.35 – 3.23 (m, 1H), 3.13 – 3.03 (m, 1H), 2.43 (d,  $J$  = 2.6 Hz, 3H), 1.27 (s, 6H), 1.21 – 1.12 (m, 9H) ppm.

**$^{13}\text{C}$  NMR:** (126 MHz,  $\text{CDCl}_3$ )  $\delta$  168.2, 167.3, 158.1, 158.1, 146.1, 146.0, 145.2, 145.2, 145.0, 144.9, 140.9, 140.8, 132.7, 132.7, 132.3, 132.2, 131.5, 131.5, 129.2, 129.1, 129.1, 127.3, 127.3, 127.0, 126.9, 103.7, 103.7, 101.6, 101.6, 69.6, 69.5, 68.0, 67.9, 59.8, 59.8, 50.7, 46.9, 45.3, 41.9, 37.0, 36.9, 29.7, 21.2, 21.1, 20.7, 19.4, 19.3, 14.3 ppm. *Note:* all diastereomeric carbons are listed.

**Note:** The primary amine nucleophile used was racemic.

**HRMS:** Calc'd for  $\text{C}_{33}\text{H}_{44}\text{ClN}_4\text{O}_7\text{S}$  [ $\text{M}+\text{H}^+$ ] 675.2614; found 675.2611.

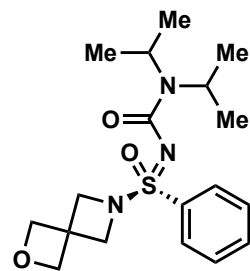

**8n**

GP-11 (NaI) was followed with addition changes mentioned: Commercially 2-oxa-6-azaspiro[3.3]heptane oxalate (1.0 eq., 0.1 mmol) was used. The equivalents of  $\text{Et}_3\text{N}$  were increased from 2 to 6 equivalents and the reaction was heated to 60 °C for 24 hours; no

further modifications were made. Purified by silica gel column chromatography using hexane/EtOAc (0% to 40% EtOAc gradient) to give the product (30 mg, 82  $\mu$ mol, 82% yield) as a white amorphous solid.

**Physical characteristics:** White amorphous solid.

**TLC:**  $R_f$  = 0.32 (hexane/EtOAc, 60% EtOAc).

**$^1\text{H}$  NMR:** (500 MHz,  $\text{CDCl}_3$ )  $\delta$  7.91 – 7.85 (m, 2H), 7.62 – 7.55 (m, 1H), 7.56 – 7.48 (m, 2H), 4.71 (d,  $J$  = 7.2 Hz, 2H), 4.67 (d,  $J$  = 7.3 Hz, 2H), 4.18 (d,  $J$  = 8.5 Hz, 2H), 4.16 – 4.07 (m, 1H), 3.98 (d,  $J$  = 8.5 Hz, 2H), 3.94 (s, 1H), 1.29 – 1.21 (m, 12H) ppm.

**$^{13}\text{C}$  NMR:** (126 MHz,  $\text{CDCl}_3$ )  $\delta$  157.7, 138.0, 132.8, 129.1, 127.6, 80.9, 59.7, 47.0, 45.2, 37.4, 21.5, 20.7 ppm.

**Specific rotation:**  $[\alpha]_D^{23.2} = -5.21$  (c 0.90,  $\text{CHCl}_3$ )

**HRMS:** Calc'd for  $\text{C}_{18}\text{H}_{27}\text{N}_3\text{O}_3\text{S}$  [ $\text{M}+\text{Na}^+$ ] 388.1665; found 388.1666.

**Enantiomeric excess:** >99% ee. *Note:* When LiBr was used, 98% ee was obtained

**HPLC Conditions:** Daicel Chiralpak IC column, 70:30 *n*-hexane:*i*-PrOH, flow rate: 1 mL/min, 25  $^\circ\text{C}$ , UV detection wavelength: 220 nm, retention time: minor: 33.7 min, major: 57.8 min.

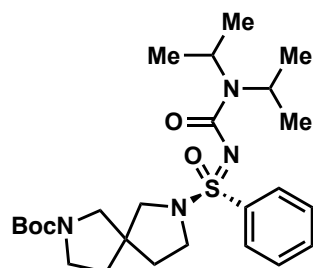

**8o**

GP-9 (NaHMDS) was followed with no additional change: Commercially available *tert*-butyl 2,7-diazaspiro[4.4]nonane-2-carboxylate (1.0 eq, 0.2 mmol) and NaHMDS (1.0 eq) were used. Purified by silica gel column chromatography using hexane/EtOAc (0% to 40% EtOAc gradient) to give an inseparable mixture of diastereomers (92 mg, 187  $\mu$ mol, 93% yield) as a colorless foam.

**Physical characteristics:** Colorless foam

**TLC:**  $R_f$  = 0.58 (hexane/EtOAc, 60% EtOAc).

**$^1\text{H}$  NMR:** (500 MHz,  $\text{CDCl}_3$ )  $\delta$  7.89 (d,  $J$  = 6.9 Hz, 2H), 7.61 – 7.49 (m, 3H), 4.31 – 4.06 (m, 1H), 4.03 – 3.76 (m, 1H), 3.60 – 3.41 (m, 1H), 3.39 – 2.98 (m, 7H), 1.89 – 1.75 (m, 3H), 1.69 – 1.63 (m, 1H), 1.42 (s, 9H), 1.30 – 1.21 (m, 12H) ppm.

**$^{13}\text{C}$  NMR:** (126 MHz,  $\text{CDCl}_3$ )  $\delta$  157.5, 154.4, 138.5, 132.5, 129.1, 127.1, 79.5, 56.2, 56.1, 54.8, 54.2, 49.0, 48.1, 47.2, 47.1, 45.1, 45.0, 44.7, 35.1, 34.9, 34.8, 34.3, 28.5, 21.5, 20.8 ppm.

**Note:** The spirocyclic amine nucleophile used was racemic.

**HRMS:** Calc'd for  $\text{C}_{25}\text{H}_{41}\text{N}_4\text{O}_4\text{S}$  [ $\text{M}+\text{H}^+$ ] 493.2843; found 493.2849.

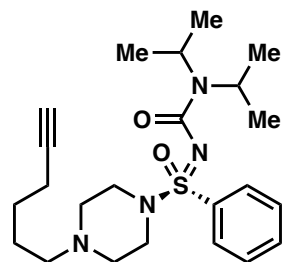

**8p**

GP-11 (LiBr) was followed with no additional change: 1-(hex-5-yn-1-yl)piperazine (1.1 eq. 0.220 mmol) was used (prepared from the procedure below). Heated the reaction at 70 °C for 13 hours. Purified by silica gel column chromatography using hexane/EtOAc (0% to 60% EtOAc gradient) to give the product (85 mg, 0.196 mmol, 98% yield) as a clear light-yellow oil.

**Physical characteristics:** Clear light-yellow oil.

**TLC:**  $R_f$  = 0.2 (hexane/EtOAc, 60% EtOAc).

**$^1\text{H}$  NMR:** (500 MHz,  $\text{CDCl}_3$ )  $\delta$  7.84 – 7.79 (m, 2H), 7.58 – 7.48 (m, 3H), 4.23 (s, 1H), 3.88 (s, 1H), 3.20 – 3.06 (m, 4H), 2.56 – 2.47 (m, 4H), 2.34 (t,  $J$  = 7.0 Hz, 2H), 2.17 (td,  $J$  = 6.8, 2.6 Hz, 2H), 1.92 (t,  $J$  = 2.6 Hz, 1H), 1.59 – 1.44 (m, 4H), 1.30 – 1.20 (m, 12H) ppm.

**$^{13}\text{C}$  NMR:** (126 MHz,  $\text{CDCl}_3$ )  $\delta$  157.2, 136.7, 132.5, 129.0, 127.6, 84.2, 68.5, 57.5, 52.3, 47.1, 45.8, 45.1, 26.2, 25.8, 21.5, 20.8, 18.3 ppm.

**Specific rotation:**  $[\alpha]_D^{23.3} = -37.98$  (c 1.00,  $\text{CHCl}_3$ )

**HRMS:** Calc'd for  $\text{C}_{23}\text{H}_{37}\text{N}_4\text{O}_2\text{S}$   $[\text{M}+\text{H}^+]$  433.2632; found 433.2636.

**Enantiomeric excess:** >99% ee.

**HPLC Conditions:** Daicel Chiralpak IA column, 90:10 *n*-hexane:*i*-PrOH, 0.1%  $\text{Et}_2\text{NH}$  as additive. flow rate: 1 mL min<sup>-1</sup>, 25 °C, UV detection wavelength: 254 nm, retention time: minor: 11.1 min, major: 12.6 min.

*Synthesis of 1-(hex-5-yn-1-yl)piperazine:*

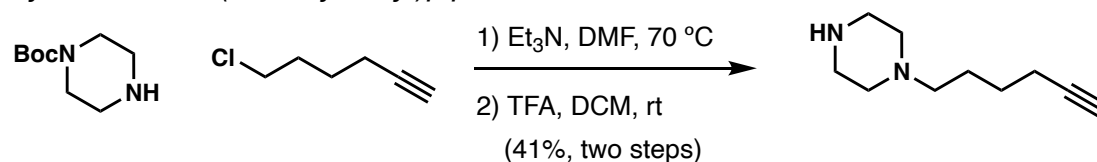

*Step 1:*

In a 200 mL round-bottom flask equipped with a stir bar was *tert*-butyl piperazine-1-carboxylate (2.55 g, 21.9 mmol, 1 eq.) in DMF (60 mL, 0.36 M). 6-chlorohex-1-yne (4.48 g, 24.1 mmol, 1.1 eq.) and Et<sub>3</sub>N (3.66 mL, 26.3 mmol, 1.2 eq.) were added then the reaction vessel was capped with a septum and heated to 70 °C for 21 hours. The reaction mixture was cooled to room temperature and DMF was removed under vacuum to give a crude residue that was taken up in EtOAc (100 mL) and half saturated aqueous NaCl (150 mL). The aqueous layer was extracted with EtOAc (100 mL x 3), combined organic layers were dried over Na<sub>2</sub>SO<sub>4</sub>, filtered and concentrated. Further purification by silica gel column chromatography using DCM/MeOH (0% to 3% MeOH gradient) gave *tert*-butyl 4-(hex-5-yn-1-yl)piperazine-1-carboxylate (2.49 g, 9.35 mmol, 43% yield) as a colorless foam that was used in the next step.

**Physical characteristics:** Colorless foam.

**TLC:** R<sub>f</sub> = 0.38 (DCM/MeOH, 5% MeOH).

**<sup>1</sup>H NMR:** (500 MHz, CDCl<sub>3</sub>) δ 3.55 – 3.39 (m, 4H), 2.54 – 2.36 (m, 6H), 2.22 (td, *J* = 6.9, 2.6 Hz, 2H), 1.94 (t, *J* = 2.6 Hz, 1H), 1.69 – 1.61 (m, 2H), 1.58 – 1.52 (m, 2H), 1.45 (s, 9H) ppm.

**<sup>13</sup>C NMR:** (126 MHz, CDCl<sub>3</sub>) δ 154.7, 84.1, 79.8, 68.6, 57.9, 52.9, 42.9, 28.4, 26.3, 25.5, 18.3 ppm.

**HRMS:** Calc'd for C<sub>15</sub>H<sub>27</sub>N<sub>2</sub>O<sub>2</sub> [M+H<sup>+</sup>] 267.2067; found 267.2063.

*Step 2:*

In a 100 mL septum capped round-bottom flask equipped with a stir bar and argon balloon was *tert*-butyl 4-(hex-5-yn-1-yl)piperazine-1-carboxylate (2.49 g, 9.35 mmol, 1 eq.) in DCM (9.4 mL, 1.0 M) was added TFA (9.37 mL, 122 mmol, 13 eq.) at room temperature. The reaction mixture stirred at room temperature for 3 hours at which time the solvents were removed under reduced pressure to give a crude oil that was taken up in DCM (250 mL), washed with saturated Na<sub>2</sub>CO<sub>3</sub> (100 mL x 3), dried over Na<sub>2</sub>SO<sub>4</sub>, filtered and concentrated to give 1-(hex-5-yn-1-yl)piperazine (1.48 g, 8.90 mmol, 95% yield) as an off-white amorphous solid that was used without further purification.

**Physical characteristics:** Off-white amorphous solid.

**TLC:** R<sub>f</sub> = 0.18 (DCM/MeOH, 5% MeOH).

**<sup>1</sup>H NMR:** (500 MHz, CDCl<sub>3</sub>) δ 2.88 (t, *J* = 4.8 Hz, 4H), 2.50 – 2.34 (m, 4H), 2.33 – 2.28 (m, 2H), 2.19 (td, *J* = 6.8, 2.6 Hz, 2H), 2.13 (s, 1H), 1.92 (t, *J* = 2.5 Hz, 1H), 1.64 – 1.49 (m, 4H) ppm.

**<sup>13</sup>C NMR:** (126 MHz, CDCl<sub>3</sub>) δ 84.34, 68.40, 58.64, 54.44, 46.01, 26.45, 25.71, 18.35.

**HRMS:** Calc'd for C<sub>10</sub>H<sub>19</sub>N<sub>2</sub> [M+H<sup>+</sup>] 167.1543; found 167.1538.

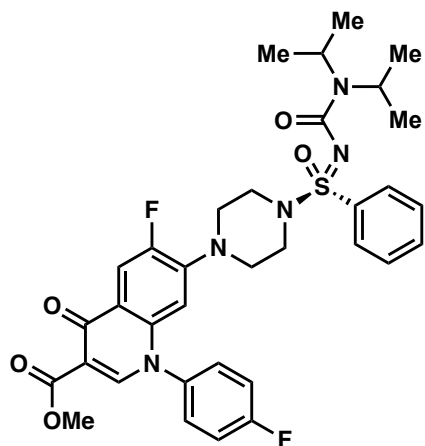

**8q**

GP-11 (LiBr) was followed with no additional change: Commercially available sarafloxacin HCl salt was used to prepare the methyl ester analog of sarafloxacin,<sup>13</sup> which was used as the secondary amine nucleophile (1 eq., 0.1 mmol). The reaction was heated to 70 °C for 10 hours. Purified by silica gel column chromatography using hexanes/acetone (0% to 50% acetone gradient) to give the product (54 mg, 81.1 μmol, 81% yield) as a light-yellow oil.

**Physical characteristics:** Light-yellow oil.

**TLC:**  $R_f$  = 0.48 (hexanes/acetone, 50% acetone).

**<sup>1</sup>H NMR:** (500 MHz, CDCl<sub>3</sub>) δ 8.39 (s, 1H), 8.03 (d,  $J$  = 12.9 Hz, 1H), 7.87 – 7.82 (m, 2H), 7.61 – 7.57 (m, 1H), 7.56 – 7.51 (m, 2H), 7.44 – 7.39 (m, 2H), 7.33 (t,  $J$  = 8.3 Hz, 2H), 6.23 (d,  $J$  = 6.9 Hz, 1H), 4.28 – 4.12 (m, 1H), 3.97 – 3.82 (m, 4H), 3.24 (dd,  $J$  = 6.5, 3.5 Hz, 4H), 3.09 (dd,  $J$  = 6.4, 3.7 Hz, 4H), 1.31 – 1.18 (m, 12H) ppm.

**<sup>13</sup>C NMR:** (126 MHz, CDCl<sub>3</sub>) δ 173.0 (d,  $J$  = 2.1 Hz), 166.1, 164.1, 162.1, 156.8, 154.3, 152.3, 148.6, 144.1 (d,  $J$  = 10.8 Hz), 138.1, 136.9, 136.5 (d,  $J$  = 3.5 Hz), 132.8, 129.3 (d,  $J$  = 9.0 Hz), 129.1, 127.4, 123.3 (d,  $J$  = 7.0 Hz), 117.8 (d,  $J$  = 23.2 Hz), 113.4 (d,  $J$  = 23.2 Hz), 110.7, 106.2 (d,  $J$  = 2.7 Hz), 52.2, 49.3 (d,  $J$  = 4.1 Hz), 47.2, 45.6, 45.3, 21.5, 20.8, 20.7 ppm.

**<sup>19</sup>F NMR:** (471 MHz, CDCl<sub>3</sub>) δ -108.84, -123.42 ppm.

**HRMS:** Calc'd for C<sub>34</sub>H<sub>38</sub>F<sub>2</sub>N<sub>5</sub>O<sub>5</sub>S [M+H<sup>+</sup>] 666.2556; found 666.2560.

**Enantiomeric excess:** Unable to separate enantiomers by HPLC chromatography.

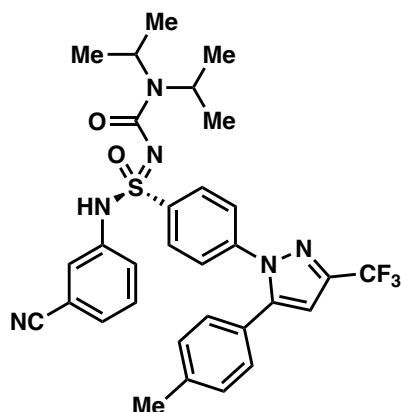

**8r**

GP-12 was followed with no additional change: Commercially available 3-aminobenzonitrile (0.25 mmol, 1.0 eq) was used. NaHMDS (2.0 eq) was used as base. Purified by silica gel column chromatography using hexane/EtOAc (0% to 30% EtOAc gradient) to give the product (115 mg, 189  $\mu$ mol, 75% yield) as a white amorphous solid.

**Physical characteristics:** White amorphous solid.

**TLC:**  $R_f$  = 0.4 (hexane/EtOAc, 35% EtOAc).

**$^1\text{H}$  NMR:** (500 MHz,  $\text{CDCl}_3$ )  $\delta$  7.83 (d,  $J$  = 8.7 Hz, 2H), 7.43 – 7.37 (m, 3H), 7.37 – 7.29 (m, 3H), 7.12 (d,  $J$  = 7.9 Hz, 2H), 7.04 – 6.98 (m, 2H), 6.71 (s, 1H), 4.31 (s, 1H), 3.86 (s, 1H), 2.38 (s, 3H), 1.32 (t,  $J$  = 5.8 Hz, 6H), 1.16 (d,  $J$  = 6.8 Hz, 6H) ppm.

**$^{13}\text{C}$  NMR:** (126 MHz,  $\text{CDCl}_3$ )  $\delta$  157.4, 145.4, 144.3 (q,  $J$  = 38.6 Hz), 142.7, 140.1, 139.9, 138.1, 130.4, 129.8, 128.8, 128.2, 127.9, 125.7, 125.5, 124.0, 121.1 (q,  $J$  = 269.1 Hz), 118.1, 113.6, 106.5 (d,  $J$  = 2.3 Hz), 47.5, 45.7, 21.4, 20.9 (dd,  $J$  = 39.0, 20.4 Hz) ppm.

**$^{19}\text{F}$  NMR:** (471 MHz,  $\text{CDCl}_3$ )  $\delta$  -62.52 ppm.

**Specific rotation:**  $[\alpha]_D^{23}$  = -171.85 (c 1.00,  $\text{CHCl}_3$ )

**HRMS:** Calc'd for  $\text{C}_{31}\text{H}_{32}\text{N}_6\text{O}_2\text{S}$   $[\text{M}+\text{H}^+]$  609.2254; found 609.2254.

**Enantiomeric excess:** >99% ee.

**HPLC Conditions:** Daicel Chiralpak IA column, 90:10 *n*-hexane:*i*-PrOH, flow rate: 1 mL min<sup>-1</sup>, 25 °C, UV detection wavelength: 220 nm, retention time: minor: 11.9 min, major: 16.8 min.

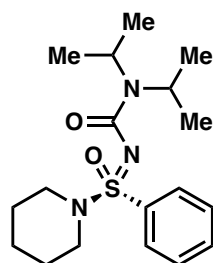

**8s**

GP-12 was followed with no additional change: Commercially available piperidine (1.0 eq) was used. *i*-PrMgCl-LiCl (1.1 eq) was used as base. *i*-PrMgCl-LiCl was added to a solution of piperidine in THF (2.5 mL) under -20 °C and stirred the mixture for 30 min, Sulfonimidoyl fluoride **S6a** (0.25 mmol, 1 eq.) in THF (0.5 mL) was added to the reaction slowly. Purified by silica gel column chromatography using hexane/EtOAc (0% to 60% EtOAc gradient) to give the product (76 mg, 216 μmol, 86% yield) as a white amorphous solid.

**Physical characteristics:** White amorphous solid.

**TLC:**  $R_f$  = 0.3 (hexane/EtOAc, 50% EtOAc).

**<sup>1</sup>H NMR:** (500 MHz, CDCl<sub>3</sub>) δ 7.85 (dd,  $J$  = 7.2, 1.8 Hz, 2H), 7.58 – 7.52 (m, 1H), 7.50 (dd,  $J$  = 8.3, 6.5 Hz, 2H), 4.21 (s, 1H), 3.92 (s, 1H), 3.20 – 2.99 (m, 4H), 1.61 (p,  $J$  = 5.6 Hz, 4H), 1.50 – 1.40 (m, 2H), 1.34 – 1.18 (m, 12H) ppm.

**<sup>13</sup>C NMR:** (126 MHz, CDCl<sub>3</sub>) δ 157.6, 138.4, 132.3, 128.9, 127.6, 47.0, 46.7, 45.2, 25.5, 23.8, 21.6, 20.9, 20.9 ppm.

**Specific rotation:**  $[\alpha]_D^{23}$  = -26.24 (c 1.00, CHCl<sub>3</sub>)

**HRMS:** Calc'd for C<sub>18</sub>H<sub>30</sub>N<sub>3</sub>O<sub>2</sub>S [M+H<sup>+</sup>] 352.2053; found 352.2047.

**Enantiomeric excess:** >99% ee.

**HPLC Conditions:** Daicel Chiralpak IA column, 98:02 *n*-hexane:*i*-PrOH, flow rate: 1 mL min<sup>-1</sup>, 25 °C, UV detection wavelength: 220 nm, retention time: major: 26.5 min, minor: 30.1 min.

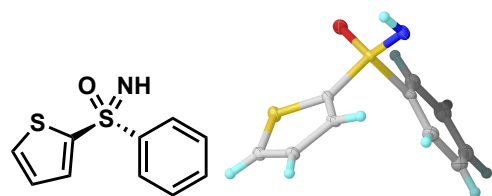

**9a**

GP-13 was followed with no additional modification: *N,N*-diisopropyl urea protected thiophene phenyl sulfoximine (87.6 mg, 0.25 mmol, 1 eq.) was used. Purified by silica gel column chromatography using DCM/acetone (0% to 10% acetone) to give the product (41.6 mg, 112 μmol, 75% yield) as a white crystalline solid.

**Physical characteristics:** White crystalline solid.

**TLC:**  $R_f$  = 0.7 (DCM/acetone, 10% acetone).

**<sup>1</sup>H NMR:** (500 MHz, CDCl<sub>3</sub>) δ 8.11 (dd,  $J$  = 7.5, 1.8 Hz, 2H), 7.65 (dd,  $J$  = 3.8, 1.4 Hz, 1H), 7.59 (dd,  $J$  = 4.9, 1.4 Hz, 1H), 7.57 – 7.52 (m, 1H), 7.49 (dd,  $J$  = 8.4, 6.6 Hz, 2H), 7.04 (dd,  $J$  = 5.0, 3.8 Hz, 1H), 3.34 (s, 1H) ppm.

**<sup>13</sup>C NMR:** (126 MHz, CDCl<sub>3</sub>) δ 146.1, 143.3, 133.8, 133.2, 132.7, 129.2, 128.0, 127.7 ppm.

**Specific rotation:**  $[\alpha]_D^{23}$  = +14.20 (c 1.00, CHCl<sub>3</sub>)

**Melting Point:** 123-125 °C

**HRMS:** Calc'd for C<sub>10</sub>H<sub>10</sub>NOS<sub>2</sub><sup>+</sup> [M+H<sup>+</sup>] 224.0198; found 224.0198.

**Enantiomeric excess:** >99% ee.

**HPLC Conditions:** Daicel Chiralpak IB column, 90:10 *n*-hexane:*i*-PrOH, flow rate: 1 mL min<sup>-1</sup>, 25 °C, UV detection wavelength: 254 nm, retention time: minor: 28.7 min, major: 29.8 min.

**CCDC deposition Number:** 2243810

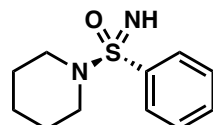

**9b**

GP-13 was followed with no additional change: Purified by silica gel column chromatography using hexane/acetone (0% to 50% acetone gradient) to give the product (20.5 mg, 91.3 μmol, 91% yield) as a white amorphous solid.

**Physical characteristics:** White amorphous solid.

**TLC:** R<sub>f</sub> = 0.28 (hexane/acetone, 50% acetone).

**<sup>1</sup>H NMR:** (500 MHz, CDCl<sub>3</sub>) δ 7.91 – 7.84 (m, 2H), 7.58 – 7.53 (m, 1H), 7.53 – 7.48 (m, 2H), 2.98 (t, *J* = 5.5 Hz, 4H), 2.44 (s, 1H), 1.68 – 1.55 (m, 4H), 1.42 – 1.29 (m, 2H) ppm.

**<sup>13</sup>C NMR:** (126 MHz, CDCl<sub>3</sub>) δ 136.4, 132.3, 128.8, 128.1, 48.1, 25.8, 23.8 ppm.

**Specific rotation:** [α]<sub>D</sub><sup>23</sup> = +28.98 (c 1.00, CHCl<sub>3</sub>)

**HRMS:** Calc'd for C<sub>11</sub>H<sub>17</sub>N<sub>2</sub>OS [M+H<sup>+</sup>] 225.1056; found 225.1056.

**Enantiomeric excess:** >99% ee.

**HPLC Conditions:** Chiralpak IB column, 95:05 *n*-hexane:*i*-PrOH, flow rate: 1 mL min<sup>-1</sup>, 25 °C, UV detection wavelength: 220 nm, retention time: minor: 27.1 min, major: 29.0 min.

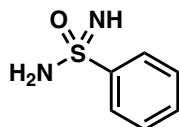

**10a**

GP-13 was followed with no additional modification: *N,N*-diisopropyl urea protected amino phenyl sulfonimidamide (50 mg, 0.176 mmol, 1 eq.) was used. Purified by silica gel column chromatography using hexane/acetone (0% to 80% acetone) to give the product (15 mg, 96 μmol, 54% yield) as a colorless amorphous solid. The NMR is matched with the literature. (*Org. Biomol. Chem.*, 2021, 19, 9470–9475)

**Physical characteristics:** Colorless amorphous solid.

**TLC:**  $R_f = 0.15$  (hexane/acetone, 50% acetone).

**$^1\text{H}$  NMR:** (500 MHz,  $\text{DMSO-d}_6$ )  $\delta$  7.96 – 7.86 (m, 2H), 7.59 – 7.44 (m, 3H), 6.31 (br s, 2H) [NH-proton not detected] ppm.

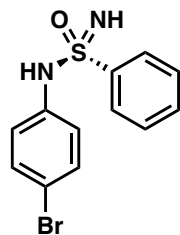

**10b**

GP-14 was followed with no additional change: Purified by silica gel column chromatography using hexane/acetone (0% to 50% acetone gradient) to give the product (26 mg, 84  $\mu\text{mol}$ , 84% yield) as a white a white amorphous solid.

**Physical characteristics:** White amorphous solid.

**TLC:**  $R_f = 0.30$  (hexane/acetone, 35% acetone).

**$^1\text{H}$  NMR:** (500 MHz,  $\text{DMSO-d}_6$ )  $\delta$  7.93 (d, 2H), 7.62 – 7.53 (m, 3H), 7.37 – 7.26 (m, 4H), 6.93 (d,  $J = 8.2$  Hz, 2H) ppm.

**$^{13}\text{C}$  NMR:** (126 MHz,  $\text{DMSO-d}_6$ )  $\delta$  144.9, 143.7, 131.7, 131.4, 128.9, 126.4, 124.8, 112.2 ppm.

**Specific rotation:**  $[\alpha]_D^{23} = +262.22$  (c 0.5,  $\text{CHCl}_3$ )

**HRMS:** Calc'd for  $\text{C}_{12}\text{H}_{12}\text{N}_2\text{OS}$   $[\text{M}+\text{H}^+]$  310.9848; found 310.9848.

**ee>99%**

**HPLC Conditions:** Chiralpak IC column, 70:30 *n*-hexane:*i*-PrOH, flow rate: 1 mL min<sup>-1</sup>, 25 °C, UV detection wavelength: 220 nm, retention time: minor: 6.2 min, major: 6.6 min.

## IXc. Asymmetric synthesis of dopamine D<sub>1</sub> receptor agonist intermediate.

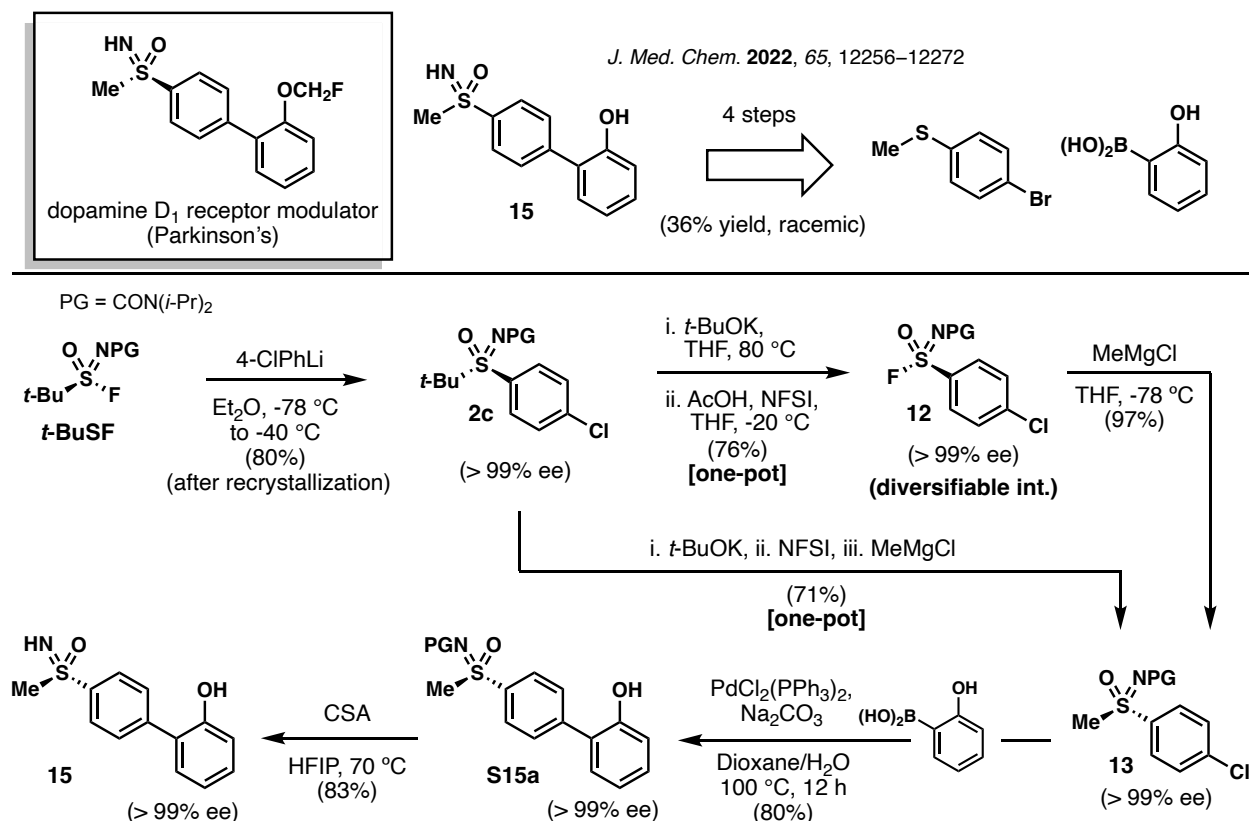

**Scheme 19:** Asymmetric formal synthesis of a biaryl sulfoximine allosteric modulator of the dopamine D<sub>1</sub> receptor.

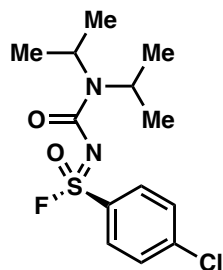

**12**

*N,N*-diisopropyl urea protected *tert*-butyl 4-chlorophenyl sulfoximine **2c** (552 mg, 1.54 mmol) with >99% ee was obtained by recrystallization of 95% ee material and >90% recovery. GP-15 was applied for the recrystallization using hexanes/EtOAc as a solvent system.

GP-6 was followed for the fluorination with an increased reaction time of step 1 (*t*-BuOK, THF, 80 °C) from 2 to 3 hours. Purified by silica gel column chromatography using

hexane/EtOAc (0% to 20% EtOAc gradient) to give the product (380 mg, 1.18 mmol, 76% yield) as a white amorphous solid.

**Physical characteristics:** White amorphous solid.

**TLC:**  $R_f$  = 0.43 (hexane/EtOAc, 20% EtOAc).

**$^1\text{H}$  NMR:** (500 MHz,  $\text{CDCl}_3$ )  $\delta$  8.04 – 7.98 (m, 2H), 7.62 – 7.56 (m, 2H), 4.15 (s, 1H), 3.83 (s, 1H), 1.32 (dd,  $J$  = 6.8, 3.8 Hz, 6H), 1.22 (dd,  $J$  = 6.9, 5.2 Hz, 6H) ppm.

**$^{13}\text{C}$  NMR:** (126 MHz,  $\text{CDCl}_3$ )  $\delta$  153.1 (d,  $J$  = 3.0 Hz), 141.9, 133.9 (d,  $J$  = 24.1 Hz), 130.0, 129.3, 48.4, 46.0, 21.3, 20.6, 20.6 ppm.

**$^{19}\text{F}$  NMR:** (471 MHz,  $\text{CDCl}_3$ )  $\delta$  69.70 ppm.

**Specific rotation:**  $[\alpha]_D^{23} = +14.43$  (c 1.00,  $\text{CHCl}_3$ )

**HRMS:** Calc'd for  $\text{C}_{13}\text{H}_{19}\text{ClFN}_2\text{O}_2\text{S}$   $[\text{M}+\text{H}^+]$  321.0834; found 321.0829.

**Enantiomeric excess:** >99% ee.

**HPLC Conditions:** Daicel Chiralpak IC column, 70:30 *n*-hexane:*i*-PrOH, flow rate: 1 mL min<sup>-1</sup>, 25 °C, UV detection wavelength: 220 nm, retention time: minor: 12.9 min, major: 15.0 min.

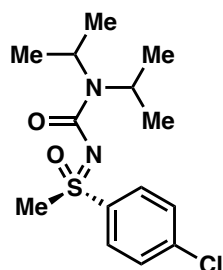

**13**

GP-7 was followed on a larger scale, -78 °C instead of 0 °C: *N,N*-diisopropyl urea protected sulfonylimidoyl fluoride **12** (321mg, 1.0 mmol, 1.0 eq) was used with commercially available MeMgCl (0.367 mL, 1.1 eq, 3.0 M in THF, used without titration). Purified by silica gel column chromatography using hexane/EtOAc (0% to 50% EtOAc gradient) to give the product (310 mg, 0.978 mmol, 97% yield) as a white amorphous solid.

The one-pot chiral sulfoximine synthesis was employed using modified GP-12 (addition of MeMgCl 3 eq., at -78 °C) with **2c** to prepare urea protected chiral methyl sulfoximine **13** (215 mg, 0.60 mmol, 71% yield, >99% ee).

**Physical characteristics:** White amorphous solid.

**TLC:**  $R_f$  = 0.15 (hexane/EtOAc, 30% EtOAc).

**$^1\text{H}$  NMR:** (500 MHz,  $\text{CDCl}_3$ )  $\delta$  7.91 – 7.87 (m, 2H), 7.56 – 7.52 (m, 2H), 4.04 (s, 2H), 3.31 (s, 3H), 1.24 (dd,  $J$  = 6.9, 2.7 Hz, 12H) ppm.

**$^{13}\text{C}$  NMR:** (126 MHz,  $\text{CDCl}_3$ )  $\delta$  158.9, 139.9, 139.2, 129.9, 128.9, 45.1, 21.2 ppm.

**Specific rotation:**  $[\alpha]_D^{23} = -13.14$  (c 1.00,  $\text{CHCl}_3$ )

**HRMS:** Calc'd for C<sub>14</sub>H<sub>22</sub>ClN<sub>2</sub>O<sub>2</sub>S [M+H<sup>+</sup>] 317.1805; found 317.1801.

**Enantiomeric excess:** >99% ee.

**HPLC Conditions:** Daicel Chiralpak IC column, 70:30 *n*-hexane:*i*-PrOH, flow rate: 1 mL min<sup>-1</sup>, 25 °C, UV detection wavelength: 220 nm, retention time: minor: 14.4 min, major: 26.5 min.

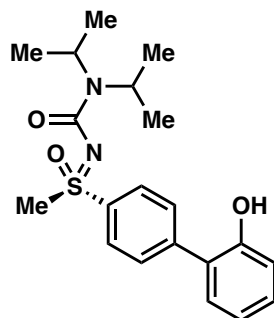

### S15a

General Suzuki coupling conditions were used. To a flame dried round-bottom flask with magnetic stir bar and under argon, *N,N*-diisopropyl urea protected 4-Cl-phenyl methyl sulfoximine (95mg, 0.3 mmol, 1 eq.), commercially available 2-Hydroxyphenylboronic acid (62 mg, 1.5 eq), PdCl<sub>2</sub>(PPh<sub>3</sub>)<sub>2</sub> (10.5 mg, 10%) and Na<sub>2</sub>CO<sub>3</sub> (95.4 mg, 3.0 eq) were added. Then dissolved the mixture with degassed dioxane/H<sub>2</sub>O (2:1) solution. Heated to 100 °C and stirred for 12 h in oil bath. Removed for bath and cooled to room temperature. Quenched the reaction with water and extracted with EtOAc (10 mL x 3). Washed the combined organic layer with water (10 mL x 3) and brine (10 mL x 3). Dried over anhydrous Na<sub>2</sub>SO<sub>4</sub>. Purified by silica gel column chromatography using hexane/EtOAc (0% to 50% EtOAc gradient) to give the product (90 mg, 240 μmol, 80% yield) as a white amorphous solid.

**Physical characteristics:** White amorphous solid.

**TLC:** R<sub>f</sub> = 0.26 (hexane/EtOAc, 50% EtOAc).

**<sup>1</sup>H NMR:** (500 MHz, CDCl<sub>3</sub>) δ 7.95 (d, *J* = 8.5 Hz, 2H), 7.74 (d, *J* = 8.5 Hz, 2H), 7.46 (d, *J* = 4.0 Hz, 1H), 7.29 – 7.22 (m, 2H), 7.04 (dd, *J* = 8.6, 1.2 Hz, 1H), 6.98 (td, *J* = 7.4, 1.3 Hz, 1H), 4.16 (d, *J* = 68.5 Hz, 2H), 3.34 (s, 3H), 1.34 (dt, *J* = 43.8, 6.6 Hz, 12H) ppm.

**<sup>13</sup>C NMR:** (126 MHz, CDCl<sub>3</sub>) δ 159.4, 154.0, 144.0, 137.7, 130.4, 130.3, 129.8, 127.1, 126.2, 120.3, 117.0, 46.9, 45.5, 45.4, 21.6, 21.5, 20.9 ppm.

**Specific rotation:** [α]<sub>D</sub><sup>23</sup> = -2.78 (c 1.00, CHCl<sub>3</sub>)

**HRMS:** Calc'd for C<sub>20</sub>H<sub>27</sub>N<sub>2</sub>O<sub>3</sub>S [M+H<sup>+</sup>] 375.1737; found 375.1730.

**Enantiomeric excess:** >99% ee.

**HPLC Conditions:** Daicel Chiralpak IC column, 70:30 *n*-hexane:*i*-PrOH, flow rate: 1 mL min<sup>-1</sup>, 25 °C, UV detection wavelength: 220 nm, retention time: major: 9.5 min, minor: 11.8 min.

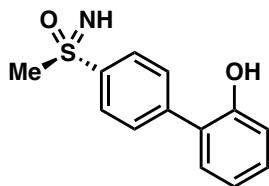

15

GP-13 was followed and no additional change: *N,N*-diisopropyl urea protected methyl biaryl sulfoximine (0.1 mmol) was used. Purified by silica gel column chromatography using hexane/acetone (0% to 60% acetone gradient) to give the product (20.6 mg, 83  $\mu$ mol, 83% yield) as a white solid.

**Physical characteristics:** White amorphous solid.

**TLC:**  $R_f$  = 0.2 (hexane/acetone, 50% acetone).

**$^1\text{H}$  NMR:** (500 MHz, DMSO- $d_6$ )  $\delta$  9.74 (s, 1H), 7.92 (d,  $J$  = 8.5 Hz, 2H), 7.74 (d,  $J$  = 8.5 Hz, 2H), 7.29 (dd,  $J$  = 7.6, 1.8 Hz, 1H), 7.20 (ddd,  $J$  = 8.2, 7.3, 1.7 Hz, 1H), 6.96 (dd,  $J$  = 8.1, 1.2 Hz, 1H), 6.90 (td,  $J$  = 7.5, 1.2 Hz, 1H), 4.17 (s, 1H), 3.08 (s, 3H) ppm.

**$^{13}\text{C}$  NMR:** (126 MHz, DMSO- $d_6$ )  $\delta$  154.5, 142.7, 141.9, 130.4, 129.5, 129.5, 127.0, 126.2, 119.6, 116.2, 45.9 ppm.

**Specific rotation:**  $[\alpha]_D^{23}$  = +5.53 (c 1.00, MeOH)

**HRMS:** Calc'd for  $\text{C}_{13}\text{H}_{14}\text{NO}_2\text{S}$   $[\text{M}+\text{H}^+]$  248.0740; found 248.0740.

**Enantiomeric excess:** >99% ee.

**HPLC Conditions:** Daicel Chiralpak IC column, 70:30 *n*-hexane:*i*-PrOH, flow rate: 1 mL min<sup>-1</sup>, 25 °C, UV detection wavelength: 220 nm, retention time: major: 12.4 min, minor: 20.9 min.

#### IXd. Asymmetric synthesis of a PYK2 inhibitor intermediate.

*Bioorg. Med. Chem. Lett.*, **2009**, *19*, 3253–3258

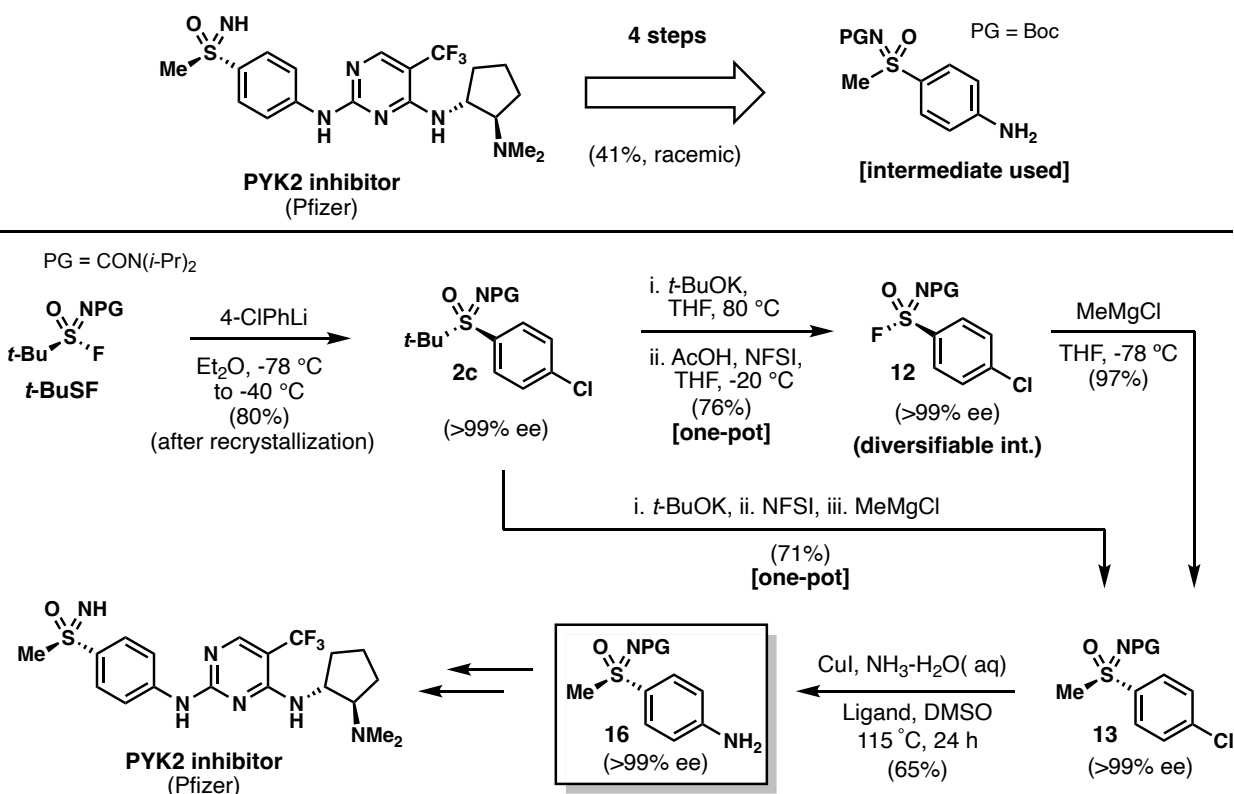

**Scheme 18:** Asymmetric formal synthesis of a PYK2 inhibitor developed by Pfizer starting from *t*-BuSF.

**Note:** Sulfoximine **13** was used as the starting material from the methods described above.

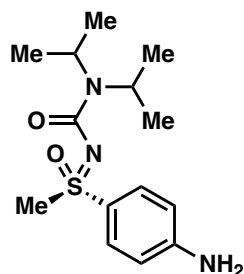

16

Used modified conditions from the reported method.<sup>14</sup> To a flame dried sealed tube with magnetic stir bar, added *N,N*-diisopropyl urea protected 4-chlorophenyl methyl sulfoximine **13** (158 mg, 0.5 mmol, 1 eq.), CuI (9.5 mg, 10 mol%), ligand prepared from above reference (16.2 mg, 10 mol%) and K<sub>3</sub>PO<sub>4</sub> (117 mg, 1.1 eq). The flask was evacuated and back filled with argon three times then anhydrous DMSO (0.5 mL, 1.0 M) was added to

the mixture, followed by aqueous ammonia solution (133  $\mu$ L, 2.0 eq, 30% w/w). The reaction tube was tightly sealed and heated to 115  $^{\circ}$ C in oil bath (blast shield was placed in front of the reaction). After 24 hours, the reaction was cooled to room temperature then diluted with EtOAc and brine, extracted with EtOAc (15 mL x 3). Combined organic layers were washed with water (10 mL x 3) and brine (10 mL x 3), dried over Na<sub>2</sub>SO<sub>4</sub>, filtered and concentrated. Further purified by silica gel column chromatography using hexane/EtOAc (0% to 50% EtOAc gradient) to give the product (97 mg, 0.326 mmol, 65% yield) as a white amorphous solid.

**Physical characteristics:** White amorphous solid.

**TLC:** R<sub>f</sub> = 0.16 (hexane/EtOAc, 50% EtOAc).

**<sup>1</sup>H NMR:** (500 MHz, DMSO-*d*<sub>6</sub>)  $\delta$  7.49 (d, 2H), 6.69 – 6.61 (m, 2H), 6.05 (s, 2H), 4.18 (s, 1H), 3.91 – 3.55 (m, 1H), 3.25 (s, 3H), 1.15 (dd, *J* = 7.0, 3.7 Hz, 12H) ppm.

**<sup>13</sup>C NMR:** (126 MHz, DMSO-*d*<sub>6</sub>)  $\delta$  158.5, 153.2, 128.8, 124.2, 112.9, 46.2, 44.7, 43.9, 21.1, 20.8 ppm.

**Specific rotation:**  $[\alpha]_D^{23} = -21.01$  (c 1.00, CHCl<sub>3</sub>)

**HRMS:** Calc'd for C<sub>14</sub>H<sub>24</sub>N<sub>3</sub>O<sub>2</sub>S [M+H<sup>+</sup>] 298.1584; found 289.1573.

**Enantiomeric excess:** >99% ee.

**HPLC Conditions:** Daicel Chiralpak IC column, 70:30 *n*-hexane:*i*-PrOH, flow rate: 1 mL min<sup>-1</sup>, 25  $^{\circ}$ C, UV detection wavelength: 220 nm, retention time: major: 18.2 min, minor: 31.0 min.

### IXe. Asymmetric synthesis of celecoxib sulfoximine analog.

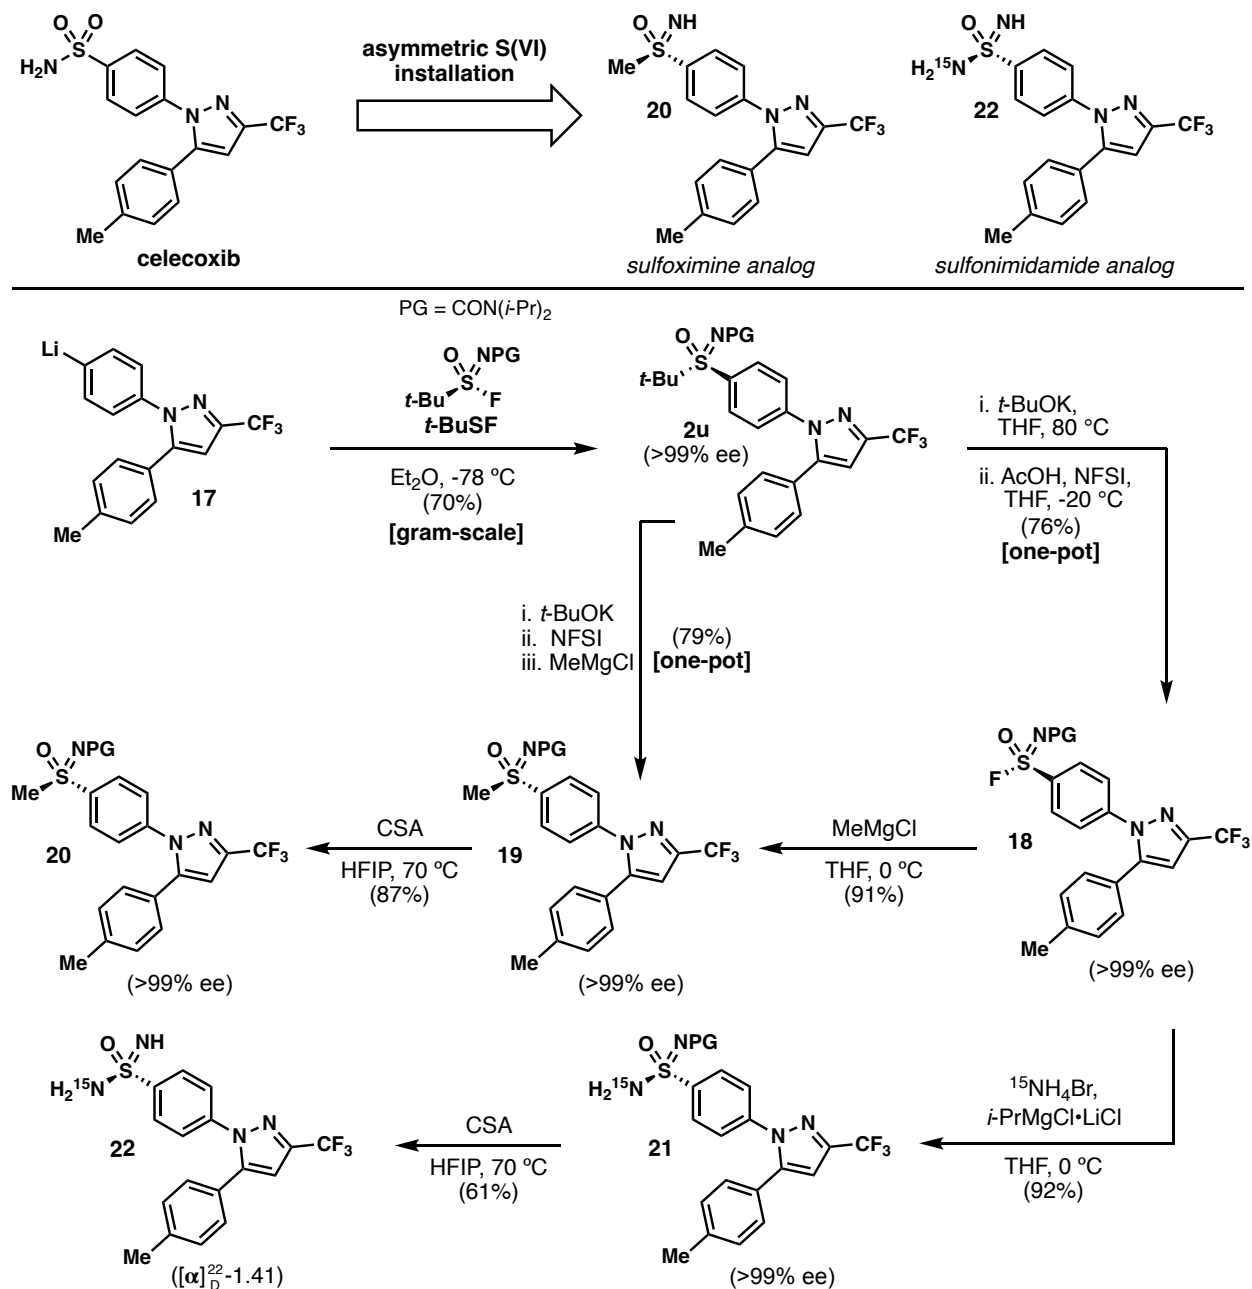

**Scheme 17:** Asymmetric synthesis of sulfoximine Celebrex analog in three steps from *t*-BuSF.

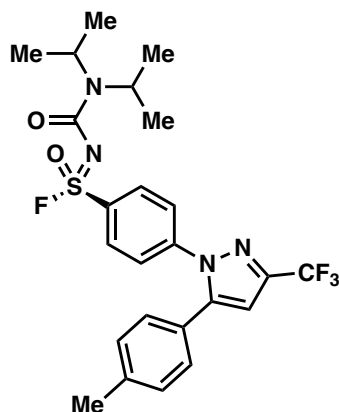

18

The requisite *tert*-butyl sulfoximine **2u** was prepared as described above using GP-1 on a gram-scale (1.54 g, 2.81 mmol, 70% yield, >99% ee).

GP-6 was followed with no additional change: *N,N*-diisopropyl urea protected *tert*-butyl celebrex sulfoximine **2u** (0.5 g, 0.91 mmol, 1.0 eq) was used. Purified by silica gel column chromatography using hexane/EtOAc (0% to 30% EtOAc gradient) to give the product (400 mg, 0.78 mmol, 84% yield) as colorless oil which solidified into a white amorphous solid.

**Physical characteristics:** White amorphous solid.

**TLC:**  $R_f$  = 0.4 (hexane/EtOAc, 40% EtOAc).

**<sup>1</sup>H NMR:** (500 MHz, CDCl<sub>3</sub>)  $\delta$  8.04 (d,  $J$  = 8.8 Hz, 2H), 7.57 (d,  $J$  = 8.8 Hz, 2H), 7.21 (d,  $J$  = 7.9 Hz, 2H), 7.13 (d,  $J$  = 8.2 Hz, 2H), 6.75 (s, 1H), 4.15 (s, 1H), 3.82 (s, 1H), 2.39 (s, 3H), 1.31 (dd,  $J$  = 6.8, 4.7 Hz, 6H), 1.21 (t,  $J$  = 6.6 Hz, 6H) ppm.

**<sup>13</sup>C NMR:** (126 MHz, CDCl<sub>3</sub>)  $\delta$  152.92 (d,  $J$  = 3.2 Hz), 145.55, 144.64 (q,  $J$  = 38.7 Hz), 144.35, 140.20, 134.42 (d,  $J$  = 24.1 Hz), 130.01, 128.86 (d,  $J$  = 1.8 Hz), 125.66, 125.45, 121.04 (q,  $J$  = 269.2 Hz), 106.94 (d,  $J$  = 2.2 Hz), 48.44, 45.98, 21.44, 21.36 – 21.12 (m), 20.52 (d,  $J$  = 6.0 Hz) ppm.

**<sup>19</sup>F NMR:** (471 MHz, CDCl<sub>3</sub>)  $\delta$  70.21, -62.58 ppm.

**Specific rotation:**  $[\alpha]_D^{23}$  = +7.62 (c 1.00, CHCl<sub>3</sub>)

**HRMS:** Calc'd for C<sub>24</sub>H<sub>27</sub>F<sub>4</sub>N<sub>4</sub>O<sub>2</sub>S [M+H<sup>+</sup>] 511.1785; found 511.1788.

**Enantiomeric excess:** >99% ee. (Based on later methylation or amination)

**HPLC Conditions:** Unable to separate enantiomers by HPLC chromatography.

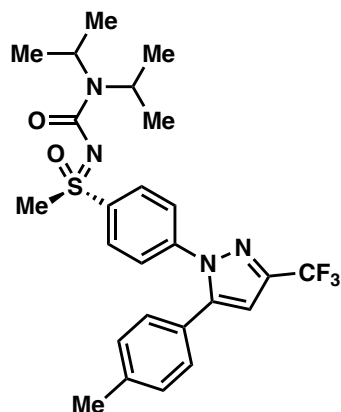

**19**

GP-7 was followed: *N,N*-diisopropyl urea protected sulfonylimidoyl fluoride **18** (127 mg, 0.25 mmol, 1.0 eq) was used with commercially available MeMgCl (1.1 eq, 3.0 M in THF, used without titration). Purified by silica gel column chromatography using hexane/EtOAc (0% to 40% EtOAc gradient) to give the product (116 mg, 0.23 mmol, 91% yield, >99% ee) as a white amorphous solid.

The one-pot chiral sulfoximine synthesis was employed using GP-12 with **2u** and MeMgCl (3 eq.) to prepare urea protected chiral methyl sulfoximine analog of celecoxib **19** (220 mg, 0.431 mmol, 79% yield, >99% ee).

**Physical characteristics:** White amorphous solid.

**TLC:**  $R_f$  = 0.38 (hexane/EtOAc, 50% EtOAc).

**$^1\text{H}$  NMR:** (500 MHz,  $\text{CDCl}_3$ )  $\delta$  7.93 (d,  $J$  = 8.7 Hz, 2H), 7.53 (d,  $J$  = 8.7 Hz, 2H), 7.18 (d,  $J$  = 8.0 Hz, 2H), 7.13 (d,  $J$  = 8.2 Hz, 2H), 6.74 (s, 1H), 4.44 – 3.67 (m, 2H), 3.33 (s, 3H), 2.38 (s, 3H), 1.24 (t,  $J$  = 6.4 Hz, 12H). ppm.

**$^{13}\text{C}$  NMR:** (126 MHz,  $\text{CDCl}_3$ )  $\delta$  158.9, 145.4, 144.3 (q,  $J$  = 38.5 Hz), 143.1, 140.0, 139.9, 129.9, 128.9, 128.5, 125.8, 125.7, 121.2 (q,  $J$  = 269.2 Hz), 106.6 (d,  $J$  = 2.0 Hz), 45.0, 21.4, 21.2 ppm.

**$^{19}\text{F}$  NMR:** (471 MHz,  $\text{CDCl}_3$ )  $\delta$  -62.49.ppm.

**Specific rotation:**  $[\alpha]_D^{23} = -18.22$  (c 1.00,  $\text{CHCl}_3$ )

**HRMS:** Calc'd for  $\text{C}_{25}\text{H}_{29}\text{F}_3\text{N}_4\text{NaO}_2\text{S}$  [ $\text{M}+\text{Na}^+$ ] 529.1856; found 529.1854.

**Enantiomeric excess:** >99% ee.

**HPLC Conditions:** Daicel Chiralpak IC column, 70:30 *n*-hexane:*i*-PrOH, flow rate: 1 mL min<sup>-1</sup>, 25 °C, UV detection wavelength: 220 nm, retention time: major: 12.9 min, minor: 22.5 min.

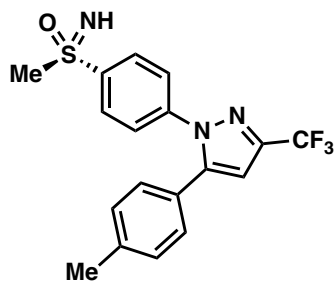

**20**

Deprotection of **19** (50.7 mg, 100  $\mu$ mol, 1 eq) using GP-13 was followed with no additional changes. Purified by silica gel column chromatography using hexane/EtOAc (0% to 50% EtOAc gradient) to give the product (33 mg, 87  $\mu$ mol, 87% yield) as a white amorphous solid.

**Physical characteristics:** White amorphous solid.

**TLC:**  $R_f$  = 0.28 (hexane/EtOAc, 50% EtOAc).

**$^1\text{H}$  NMR:** (500 MHz,  $\text{CDCl}_3$ )  $\delta$  7.99 (d,  $J$  = 8.7 Hz, 2H), 7.50 (d,  $J$  = 8.7 Hz, 2H), 7.17 (d,  $J$  = 7.9 Hz, 2H), 7.11 (d,  $J$  = 8.3 Hz, 2H), 6.74 (s, 1H), 3.14 (s, 3H), 3.02 (s, 1H), 2.37 (s, 3H) ppm.

**$^{13}\text{C}$  NMR:** (126 MHz,  $\text{CDCl}_3$ )  $\delta$  145.4, 144.3 (q,  $J$  = 38.5 Hz), 143.2, 142.4, 139.9, 129.9, 128.9, 128.8, 125.8, 125.7, 121.1 (q,  $J$  = 269.2 Hz), 106.5 (d,  $J$  = 2.1 Hz), 46.2, 21.4 ppm.

**$^{19}\text{F}$  NMR:** (471 MHz,  $\text{CDCl}_3$ )  $\delta$  -65.50 ppm.

**Specific rotation:**  $[\alpha]_D^{23}$  = +42.33 (c 1.00,  $\text{CHCl}_3$ )

**HRMS:** Calc'd for  $\text{C}_{18}\text{H}_{17}\text{N}_3\text{OS}$   $[\text{M}+\text{H}^+]$  380.1039; found 380.1039.

**Enantiomeric excess:** >99% ee.

**HPLC Conditions:** Daicel Chiralpak IC column, 70:30 *n*-hexane:*i*-PrOH, flow rate: 1 mL min<sup>-1</sup>, 25 °C, UV detection wavelength: 220 nm, retention time: minor: 21.6 min, major: 31.3 min.

**Xf. Asymmetric synthesis of isotopically labeled  $^{15}\text{NH}_2$  celecoxib sulfonylimidamide analog.**

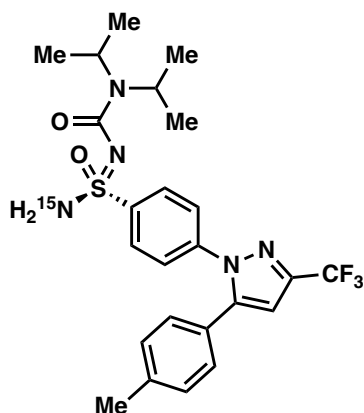

**21**

GP-10 was followed with no additional change: Commercially available  $^{15}\text{NH}_4\text{Br}$  (3.0 eq) was used as a nitrogen source. *i*-PrMgCl-LiCl (6.0 eq) was used as base.  $^{15}\text{NH}_4\text{Br}$  and *i*-PrMgClLiCl were mixed at room temperature in THF (2.5 mL) and stirred the mixture for 30 min, sulfonylimidoyl fluoride **18** (0.25 mmol, 1 eq.) in THF (0.5 mL) was added to the reaction slowly. Purified by silica gel column chromatography using hexane/EtOAc (0% to 25% EtOAc gradient) to give the product (117 mg, 230  $\mu\text{mol}$ , 92% yield) as a white amorphous solid.

**Physical characteristics:** White amorphous solid.

**TLC:**  $R_f$  = 0.4 (hexane/acetone, 33% acetone).

**$^1\text{H}$  NMR:** (500 MHz,  $\text{CDCl}_3$ )  $\delta$  7.92 (d,  $J$  = 8.5 Hz, 2H), 7.43 (d,  $J$  = 8.5 Hz, 2H), 7.16 (d,  $J$  = 7.8 Hz, 2H), 7.10 (d,  $J$  = 7.9 Hz, 2H), 6.85 – 6.35 (m, 3H), 4.26 (s, 1H), 3.78 (s, 1H), 2.36 (s, 3H), 1.29 – 1.21 (m, 6H), 1.16 (d,  $J$  = 6.9 Hz, 6H) ppm.

**$^{19}\text{F}$  NMR:** (471 MHz,  $\text{CDCl}_3$ )  $\delta$  -62.43 ppm.

**$^{13}\text{C}$  NMR:** (126 MHz,  $\text{CDCl}_3$ )  $\delta$  157.96, 145.27, 144.06 (q,  $J$  = 38.5 Hz), 142.91 (d,  $J$  = 4.3 Hz), 142.30, 139.78, 129.79, 128.81, 127.31, 125.85, 125.35, 121.16 (q,  $J$  = 269.2 Hz), 106.33 (d,  $J$  = 2.3 Hz), 47.29, 45.22, 21.37, 21.19, 21.08, 20.85, 20.78 ppm.

**Specific rotation:**  $[\alpha]_D^{22} = -19.62$  (c 1.00,  $\text{CHCl}_3$ )

**HRMS:** Calc'd for  $\text{C}_{24}\text{H}_{29}\text{F}_3\text{N}_4^{15}\text{NO}_2\text{S}$  [ $\text{M}+\text{H}^+$ ] 509.1959; found 509.1955.

**Enantiomeric excess:** >99% ee.

**HPLC Conditions:** Daicel Chiralpak IC column, 70:30 *n*-hexane:*i*-PrOH, flow rate: 1 mL min<sup>-1</sup>, 25 °C, UV detection wavelength: 254 nm, retention time: major: 5.9 min, minor: 6.8 min.

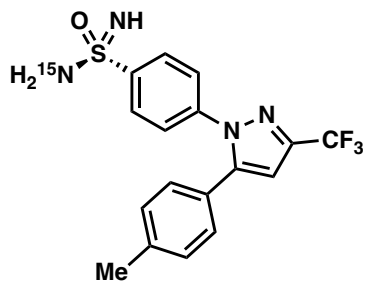

**22**

GP-13 was followed, reaction time was 30 h: *N,N*-diisopropyl urea protected sulfonimidamide **21** (50 mg, 98.3  $\mu$ mol, 1 eq.) was used. Purified by silica gel column chromatography using hexane/acetone (0% to 80% acetone) to give the product (23 mg, 60.3  $\mu$ mol, 61% yield) as a colorless amorphous solid.

**Physical characteristics:** Colorless amorphous solid.

**TLC:**  $R_f$  = 0.40 (hexane/acetone, 50% acetone).

**$^1\text{H}$  NMR:** (500 MHz,  $\text{CDCl}_3$ )  $\delta$  8.00 (d,  $J$  = 8.7 Hz, 2H), 7.44 (d,  $J$  = 8.7 Hz, 2H), 7.17 (d,  $J$  = 7.9 Hz, 2H), 7.11 (d,  $J$  = 8.1 Hz, 2H), 6.73 (s, 1H), 3.95 (s, 3H), 2.37 (s, 3H) ppm.

**$^{19}\text{F}$  NMR:** (471 MHz,  $\text{CDCl}_3$ )  $\delta$  -62.42 ppm.

**$^{13}\text{C}$  NMR:** (126 MHz,  $\text{CDCl}_3$ )  $\delta$  145.34, 144.16 (q,  $J$  = 38.6 Hz), 143.49 (d,  $J$  = 4.4 Hz), 142.38, 139.87, 129.88, 128.87, 127.74, 125.89, 125.56, 121.21 (q,  $J$  = 269.2 Hz), 106.41 (d,  $J$  = 2.2 Hz), 21.46 ppm.

**Specific rotation:**  $[\alpha]_D^{22} = -1.41$  (c 1.00,  $\text{CHCl}_3$ )

**HRMS:** Calc'd for  $\text{C}_{17}\text{H}_{16}\text{F}_3\text{N}_3^{15}\text{NOS}$   $[\text{M}+\text{H}^+]$  382.0962; found 382.0960.

## IXg. Asymmetric synthesis of begacestat sulfonimidamide analog.

ChemMedChem, 2012, 7, 396–399

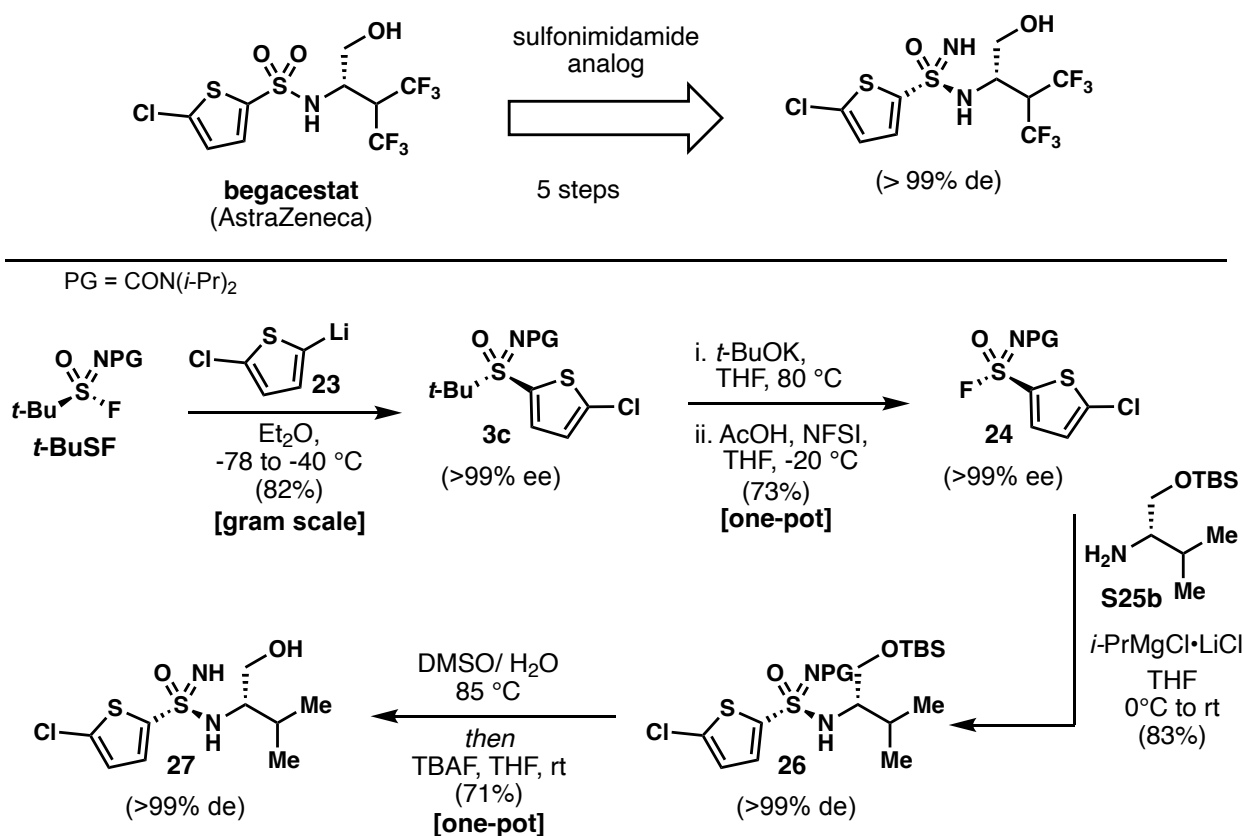

**Scheme 20:** Asymmetric synthesis of a sulfonimidamide analog of begacestat in four steps from *t*-BuSF.

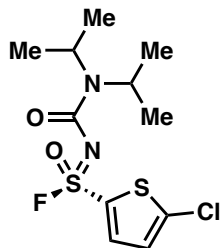

**24**

GP-6 was followed with no additional change: *N,N*-diisopropyl urea protected *tert*-butyl 5-chlorothiophene sulfoximine **3c** (1.2 g, 3.29 mmol, 1.0 eq) was used. Purified by silica gel column chromatography using hexane/EtOAc (0% to 30% EtOAc gradient) to give the product (790 mg, 2.42 mmol, 73% yield) as colorless oil which solidified into a white amorphous solid.

**Physical characteristics:** White amorphous solid.

**TLC:**  $R_f$  = 0.75 (hexane/EtOAc, 40% EtOAc).

**$^1\text{H}$  NMR:** (500 MHz,  $\text{CDCl}_3$ )  $\delta$  7.78 (d,  $J$  = 4.2 Hz, 1H), 7.03 (d,  $J$  = 4.2 Hz, 1H), 4.12 (s, 1H), 3.86 (s, 1H), 1.31 (d,  $J$  = 6.8 Hz, 6H), 1.23 (dd,  $J$  = 6.8, 4.2 Hz, 6H) ppm.

**$^{13}\text{C}$  NMR:** (126 MHz,  $\text{CDCl}_3$ )  $\delta$  153.2, 142.0 (d,  $J$  = 2.1 Hz), 135.3, 131.6 (d,  $J$  = 30.0 Hz), 127.2, 48.4, 46.0, 21.3, 20.6 ppm.

**$^{19}\text{F}$  NMR:** (471 MHz,  $\text{CDCl}_3$ )  $\delta$  77.11 ppm.

**Specific rotation:**  $[\alpha]_D^{23} = +7.23$  (c 1.00,  $\text{CHCl}_3$ )

**HRMS:** Calc'd for  $\text{C}_{11}\text{H}_{17}\text{ClFN}_2\text{O}_2\text{S}$   $[\text{M}+\text{H}^+]$  327.0399; found 327.0399.

**Enantiomeric excess:** >99% ee.

**HPLC Conditions:** Daicel Chiralpak IC column, 70:30 *n*-hexane:*i*-PrOH, flow rate: 1 mL min<sup>-1</sup>, 25 °C, UV detection wavelength: 220 nm, retention time: minor: 9.2 min, major: 10.9 min.

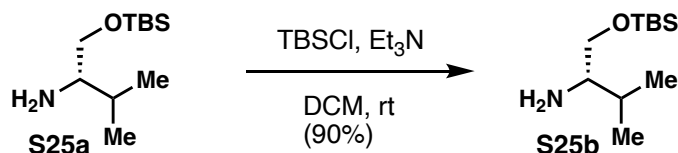

Alcohol protection of **S25a** was performed using a reported method<sup>15</sup> with no modification and to give **S25b**. Spectroscopic data was in accordance with the literature.

**$^1\text{H}$  NMR:** (500 MHz,  $\text{CDCl}_3$ )  $\delta$  3.65 (dd,  $J$  = 9.8, 4.1 Hz, 1H), 3.40 (dd,  $J$  = 9.8, 7.6 Hz, 1H), 2.59 (ddd,  $J$  = 7.6, 6.2, 4.0 Hz, 1H), 2.14 (s, 2H), 1.72 – 1.57 (m, 1H), 0.92 (dd,  $J$  = 7.7, 6.8 Hz, 6H), 0.89 (s, 9H), 0.05 (s, 6H) ppm.

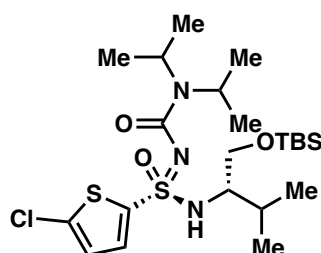

**26**

GP-10 was followed with no additional change: *N,N*-diisopropyl urea protected sulfonimidoyl fluoride **24** (98 mg, 0.3 mmol, 1.0 eq) was used with OTBS protected primary amine **S25b** (2 eq.). Purified by silica gel column chromatography using hexane/EtOAc (0% to 15% EtOAc gradient) to give the product (130 mg, 248  $\mu\text{mol}$ , 83% yield) as a colorless oil.

**Physical characteristics:** Colorless oil.

**TLC:**  $R_f$  = 0.55 (hexane/EtOAc, 10% EtOAc).

**<sup>1</sup>H NMR:** (500 MHz, CDCl<sub>3</sub>) δ 7.91 (d, *J* = 8.2 Hz, 1H), 7.43 (d, *J* = 4.1 Hz, 1H), 7.39 (d, *J* = 4.0 Hz, 0.01H, from *S*-diastereomer), 6.84 (d, *J* = 4.1 Hz, 1H), 4.33 (s, 1H), 3.69 (s, 1H), 3.45 (dd, *J* = 10.2, 3.8 Hz, 1H), 3.30 (dd, *J* = 10.2, 5.3 Hz, 1H), 3.16 – 3.06 (m, 1H), 2.02 (dp, *J* = 13.6, 6.8 Hz, 1H), 1.29 (t, *J* = 8.0 Hz, 6H), 1.13 (dd, *J* = 11.8, 6.8 Hz, 6H), 0.95 (dd, *J* = 7.0, 2.6 Hz, 6H), 0.86 (s, 9H), -0.00 (s, 3H), -0.02 (s, 3H) ppm.

**<sup>13</sup>C NMR:** (126 MHz, CDCl<sub>3</sub>) δ 157.7, 141.6, 136.8, 130.9, 125.9, 61.4, 59.9, 47.6, 45.2, 29.5, 25.9, 21.2, 21.1, 20.8, 19.1, 18.5, 18.3, -5.5, -5.6 ppm.

**Specific rotation:**  $[\alpha]_D^{23} = -42.01$  (c 1.00, CHCl<sub>3</sub>)

**HRMS:** Calc'd for C<sub>22</sub>H<sub>43</sub>ClN<sub>3</sub>O<sub>3</sub>S<sub>2</sub>Si [M+H<sup>+</sup>] 524.2198; found 524.2196.

**Diastereomeric excess:** >99% de, determined by <sup>1</sup>HNMR. Comparison was made using the racemic starting material giving a mixture of diastereomers.

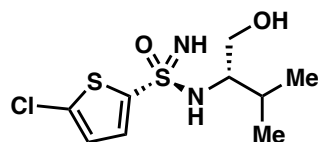

**27**

Modified GP-14 was used to telescope OTBS deprotection: To a 5 mL vial with magnetic stir bar, dissolved protected sulfonimidamide **26** (105 mg, 0.2 mmol, 1.0 eq) in DMSO (0.1 M, 2.0 mL) then added water (0.2 mL) and heated to 80 °C for 12 h. Cooled to room temperature then TBAF (1.0 mL, 5.0 eq, 1.0 M in THF, used as received) was added slowly to the mixture. Upon completion (checked by TLC) water (10 mL) was added and extracted with EtOAc (15 mL x 3), washed with water (10 mL x 3) and brine (10 mL x 3), dried over N<sub>2</sub>SO<sub>4</sub>, filtered and concentrated. Purified by silica gel column chromatography using hexane/acetone (0% to 50% acetone gradient) to give the product (40 mg, 141 μmol, 71% yield) as a colorless oil.

**Physical characteristics:** Colorless oil.

**TLC:** R<sub>f</sub> = 0.51 (hexane/EtOAc, 50% acetone).

**<sup>1</sup>H NMR:** (500 MHz, CDCl<sub>3</sub>) δ 7.40 (d, *J* = 4.1 Hz, 1H), 6.90 (d, *J* = 4.0 Hz, 1H), 3.72 (m, *J* = 14.3, 12.2, 6.3, 3.7 Hz, 2H), 3.62 – 3.54 (m, 2H), 3.21 (td, *J* = 6.5, 4.0 Hz, 1H), 3.15 (d, *J* = 4.1 Hz, 0.01 H, from *S*-diastereomer) 1.77 (dq, *J* = 13.5, 6.8 Hz, 1H), 0.83 (t, *J* = 6.4 Hz, 6H) ppm.

**<sup>13</sup>C NMR:** (126 MHz, CDCl<sub>3</sub>) δ 142.8, 137.1, 131.3, 127.0, 63.7, 62.3, 30.1, 19.3, 18.5 ppm.

**Specific rotation:**  $[\alpha]_D^{23} = +39.44$  (c 1.00, CHCl<sub>3</sub>)

**HRMS:** Calc'd for C<sub>9</sub>H<sub>16</sub>N<sub>2</sub>O<sub>2</sub>S<sub>2</sub> [M+H<sup>+</sup>] 283.0336; found 283.0336.

**Diastereomeric excess:** >99% de, determined by <sup>1</sup>HNMR. Comparison was made using the racemic starting material giving a mixture of diastereomers.

## X. Single crystal X-ray crystallography data

X-ray diffraction data were measured on Bruker D8 Venture PHOTON II CMOS diffractometer equipped with a Cu K $\alpha$  INCOATEC ImuS micro-focus source ( $\lambda = 1.54178$  Å). Indexing was performed using APEX4 [1] (Difference Vectors method). Data integration and reduction were performed using SaintPlus [2]. Absorption correction was performed by multi-scan method implemented in SADABS.<sup>16</sup> Space group was determined using XPREP implemented in APEX3 [1]. Structure was solved using SHELXT<sup>17</sup> and refined using SHELXL-2019/1<sup>18</sup> (full-matrix least-squares on F<sup>2</sup>) through OLEX2 interface program<sup>19</sup>. Ellipsoid plot was made with Platon [3].<sup>20</sup> Disorder was modeled using restraints and constraints. Data and refinement conditions are shown in Table 1.

[1] Bruker (2022). APEX4. Bruker AXS LLC, Madison, Wisconsin, USA.

[2] Bruker SAINT. Bruker AXS LLC, Madison, Wisconsin, USA.

[3] A.L.Spek, The Program PLATON is designed as a Multipurpose Crystallographic Tool. 1980-2021 A.L.Spek, Utrecht University, Utrecht, The Netherlands.

### Notes:

S1DIPA\_F (**t-BuSF**): Structure was solved using SHELXT<sup>17</sup> and refined using SHELXL-2018/3<sup>18</sup> (full-matrix least-squares on F<sup>2</sup>) through OLEX2 interface program<sup>19</sup>. All hydrogen atoms were refined using riding model. The apparent higher (pseudo)-symmetry involving *n* and a glide planes is not feasible as sample is composed of single enantiomer. The SN<sub>2</sub>/AE products of this compound were checked with chiral HPLC (Daicel Chemical, Chiralcel OJ-H, Hexane/*i*-PrOH = 95: 5, 1 mL/ min), single enantiomers were found. This compound was verified to be enantiopure. (*S*)- [ $\alpha$ ]<sub>25</sub> = +78.17 (c 1.00, CHCl<sub>3</sub>). Although possible, the structure solution in Pna2(1) results in significantly higher *R* and *R*<sub>merge</sub> factors and the presence of racemic mixture in the model. Observed pseudosymmetry arises from the presence of pseudo mirror-plane in molecules with only SFO group breaking the mirror symmetry.

2136B (**2a**): While structure shows strong pseudotranslational symmetry, there are many weak reflections violating it and larger cell was used for data processing. The model shows less disorder of -CH<sub>3</sub> and -Ph groups than the one derived using smaller unit cell. ADDSYM detects pseudotranslation along B direction above ~0.15Å translational deviation criteria.

S1\_CP (**4a**), S1\_4BrTA (**3e**), 2172 (**7k**), 2191C (**7i**), 2238B (**7f**): Structure was solved using SHELXT<sup>17</sup> and refined using SHELXL-2018/3<sup>18</sup> (full-matrix least-squares on F<sup>2</sup>) through OLEX2 interface program<sup>20</sup>. All hydrogen atoms were refined using riding model. Disordered atoms were refined with restraints.

2174B (**7a**): Structure was solved using SHELXT<sup>17</sup> and refined using SHELXL-2018/3<sup>18</sup> (full-matrix least-squares on F<sup>2</sup>) through OLEX2 interface program<sup>19</sup>. All hydrogen atoms

were refined using riding model. Disordered atoms were refined with restraints. The type and the amount of heavily disordered solvent in the channel is tentative.

4184A (**7e**): Structure was solved using SHELXT<sup>17</sup> and refined using SHELXL-2019/1<sup>18</sup> (full-matrix least-squares on F<sup>2</sup>) through OLEX2 interface program<sup>19</sup>. Ellipsoid plot was made with Platon [3]<sup>20</sup>. Disorder was modeled using restraints and constraints. The contribution of heavily disordered content (crystal was obtained from THF/DCM/chloroform mixture) in structural voids was treated as diffuse using solvent mask procedure implemented in Olex2 program<sup>19</sup>.

**Table 1 Crystal data and structure refinement for S1DIPA\_F (*t*-BuSF).**

|                                             |                                                                  |
|---------------------------------------------|------------------------------------------------------------------|
| Identification code                         | S1DIPA_F                                                         |
| Empirical formula                           | C <sub>11</sub> H <sub>23</sub> FN <sub>2</sub> O <sub>2</sub> S |
| Formula weight                              | 266.37                                                           |
| Temperature/K                               | 100.0                                                            |
| Crystal system                              | monoclinic                                                       |
| Space group                                 | P2 <sub>1</sub>                                                  |
| a/Å                                         | 11.2391(3)                                                       |
| b/Å                                         | 15.0285(4)                                                       |
| c/Å                                         | 17.1814(5)                                                       |
| α/°                                         | 90                                                               |
| β/°                                         | 90.5020(10)                                                      |
| γ/°                                         | 90                                                               |
| Volume/Å <sup>3</sup>                       | 2901.94(14)                                                      |
| Z                                           | 8                                                                |
| ρ <sub>calc</sub> /cm <sup>3</sup>          | 1.219                                                            |
| μ/mm <sup>-1</sup>                          | 2.047                                                            |
| F(000)                                      | 1152.0                                                           |
| Crystal size/mm <sup>3</sup>                | 0.2 × 0.2 × 0.08                                                 |
| Radiation                                   | CuKα (λ = 1.54178)                                               |
| 2θ range for data collection/°              | 5.144 to 160.632                                                 |
| Index ranges                                | -13 ≤ h ≤ 14, -19 ≤ k ≤ 19, -21 ≤ l ≤ 21                         |
| Reflections collected                       | 58544                                                            |
| Independent reflections                     | 12252 [R <sub>int</sub> = 0.0416, R <sub>sigma</sub> = 0.0365]   |
| Data/restraints/parameters                  | 12252/1/641                                                      |
| Goodness-of-fit on F <sup>2</sup>           | 1.023                                                            |
| Final R indexes [I ≥ 2σ (I)]                | R <sub>1</sub> = 0.0256, wR <sub>2</sub> = 0.0665                |
| Final R indexes [all data]                  | R <sub>1</sub> = 0.0262, wR <sub>2</sub> = 0.0670                |
| Largest diff. peak/hole / e Å <sup>-3</sup> | 0.31/-0.28                                                       |
| Flack parameter                             | 0.029(4)                                                         |

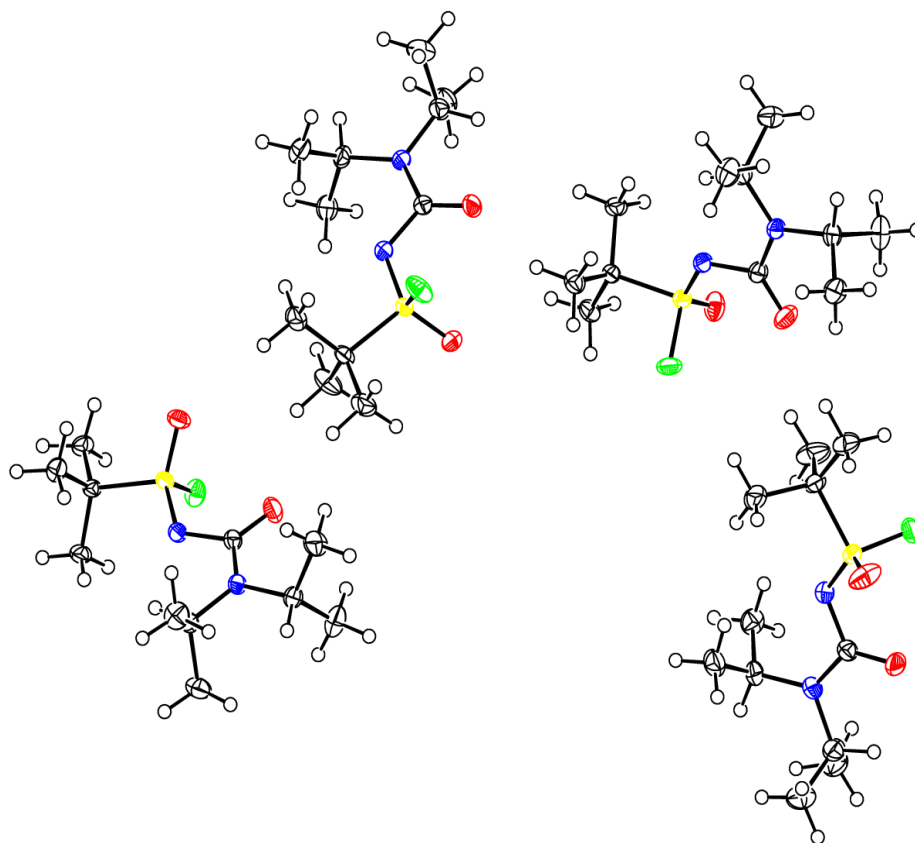

Fig.1. Ellipsoid plot of **S1DIPA\_F** (*t*-BuSF). Anisotropic displacement parameters were drawn at 50% probability level. CCDC deposition Number: 2243804

**Table 1 Crystal data and structure refinement for TBUPH (2a).**

|                                             |                                                                 |
|---------------------------------------------|-----------------------------------------------------------------|
| Identification code                         | TBUPH                                                           |
| Empirical formula                           | C <sub>17</sub> H <sub>28</sub> N <sub>2</sub> O <sub>2</sub> S |
| Formula weight                              | 324.47                                                          |
| Temperature/K                               | 100.00                                                          |
| Crystal system                              | monoclinic                                                      |
| Space group                                 | P2 <sub>1</sub>                                                 |
| a/Å                                         | 16.5691(5)                                                      |
| b/Å                                         | 6.0854(2)                                                       |
| c/Å                                         | 19.6317(6)                                                      |
| α/°                                         | 90                                                              |
| β/°                                         | 113.528(1)                                                      |
| γ/°                                         | 90                                                              |
| Volume/Å <sup>3</sup>                       | 1814.9(1)                                                       |
| Z                                           | 4                                                               |
| ρ <sub>calc</sub> /cm <sup>3</sup>          | 1.188                                                           |
| μ/mm <sup>-1</sup>                          | 1.647                                                           |
| F(000)                                      | 704.0                                                           |
| Crystal size/mm <sup>3</sup>                | 0.6 × 0.06 × 0.03                                               |
| Radiation                                   | CuKα (λ = 1.54178)                                              |
| 2θ range for data collection/°              | 4.91 to 144.758                                                 |
| Index ranges                                | -20 ≤ h ≤ 20, -7 ≤ k ≤ 7, -24 ≤ l ≤ 24                          |
| Reflections collected                       | 34970                                                           |
| Independent reflections                     | 7027 [R <sub>int</sub> = 0.0546, R <sub>sigma</sub> = 0.0438]   |
| Data/restraints/parameters                  | 7027/432/482                                                    |
| Goodness-of-fit on F <sup>2</sup>           | 1.033                                                           |
| Final R indexes [I ≥ 2σ (I)]                | R <sub>1</sub> = 0.0346, wR <sub>2</sub> = 0.0920               |
| Final R indexes [all data]                  | R <sub>1</sub> = 0.0352, wR <sub>2</sub> = 0.0926               |
| Largest diff. peak/hole / e Å <sup>-3</sup> | 0.21/-0.43                                                      |
| Flack parameter                             | 0.107(6)                                                        |

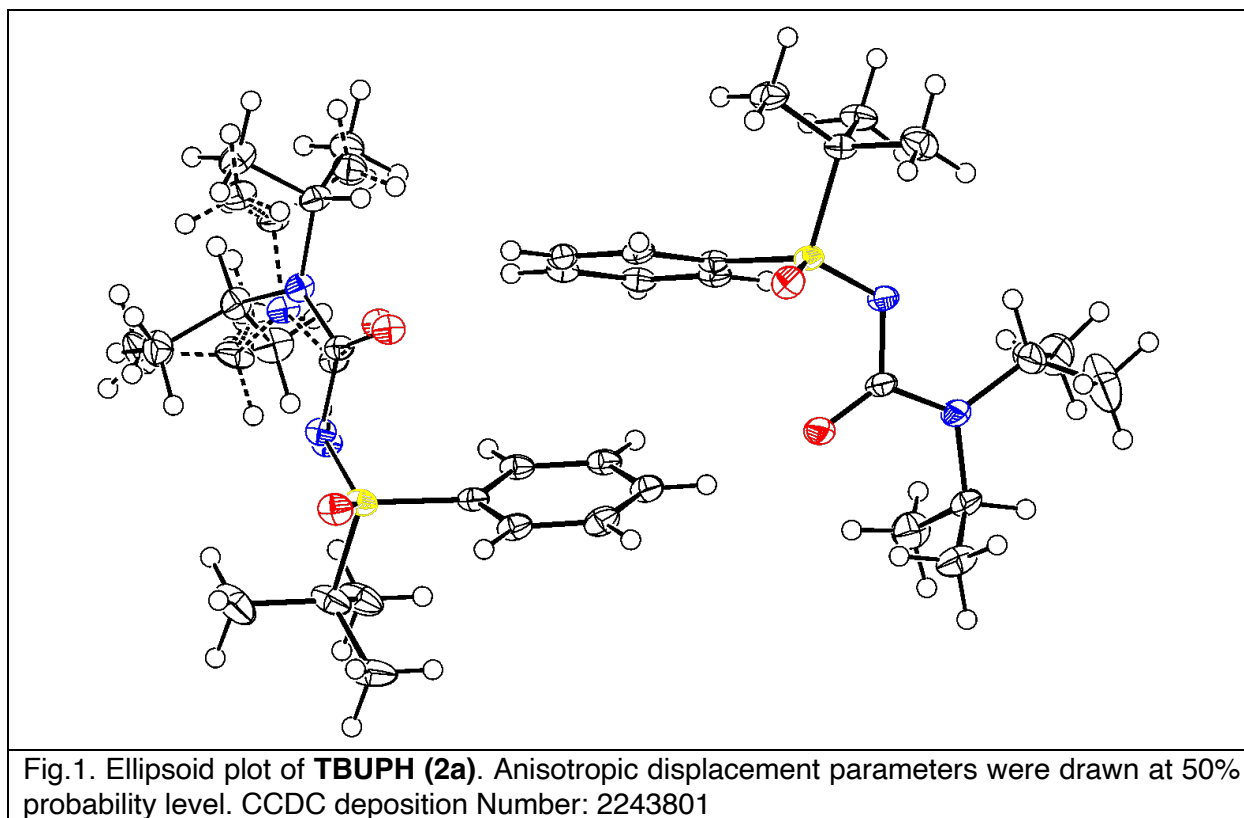

**Table 1 Crystal data and structure refinement for S1\_4BrTA (3e).**

|                                             |                                                                                |
|---------------------------------------------|--------------------------------------------------------------------------------|
| Identification code                         | S1_4BrTA                                                                       |
| Empirical formula                           | C <sub>14</sub> H <sub>24</sub> BrN <sub>3</sub> O <sub>2</sub> S <sub>2</sub> |
| Formula weight                              | 410.39                                                                         |
| Temperature/K                               | 100.0                                                                          |
| Crystal system                              | monoclinic                                                                     |
| Space group                                 | P2 <sub>1</sub>                                                                |
| a/Å                                         | 7.9955(3)                                                                      |
| b/Å                                         | 11.2096(4)                                                                     |
| c/Å                                         | 11.0513(4)                                                                     |
| α/°                                         | 90                                                                             |
| β/°                                         | 96.378(2)                                                                      |
| γ/°                                         | 90                                                                             |
| Volume/Å <sup>3</sup>                       | 984.36(6)                                                                      |
| Z                                           | 2                                                                              |
| ρ <sub>calc</sub> /cm <sup>3</sup>          | 1.385                                                                          |
| μ/mm <sup>-1</sup>                          | 4.905                                                                          |
| F(000)                                      | 424.0                                                                          |
| Crystal size/mm <sup>3</sup>                | 0.12 × 0.1 × 0.05                                                              |
| Radiation                                   | CuKα (λ = 1.54178)                                                             |
| 2θ range for data collection/°              | 8.05 to 160.25                                                                 |
| Index ranges                                | -10 ≤ h ≤ 10, -14 ≤ k ≤ 14, -14 ≤ l ≤ 14                                       |
| Reflections collected                       | 16529                                                                          |
| Independent reflections                     | 4114 [R <sub>int</sub> = 0.0706, R <sub>sigma</sub> = 0.0555]                  |
| Data/restraints/parameters                  | 4114/1/207                                                                     |
| Goodness-of-fit on F <sup>2</sup>           | 1.161                                                                          |
| Final R indexes [I ≥ 2σ (I)]                | R <sub>1</sub> = 0.0432, wR <sub>2</sub> = 0.0891                              |
| Final R indexes [all data]                  | R <sub>1</sub> = 0.0508, wR <sub>2</sub> = 0.0955                              |
| Largest diff. peak/hole / e Å <sup>-3</sup> | 0.41/-0.47                                                                     |
| Flack parameter                             | 0.068(17)                                                                      |

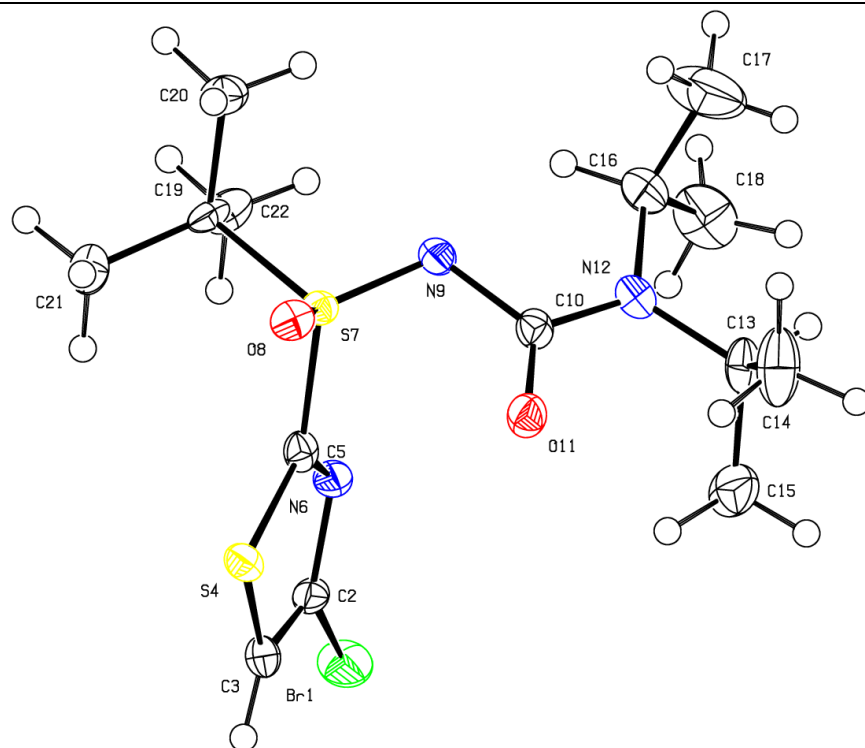

Fig.1. Ellipsoid plot of **S1\_4BrTA (3e)**. Anisotropic displacement parameters were drawn at 50% probability level. CCDC deposition Number: 2243803

**Table 1 Crystal data and structure refinement for S1\_CP (4a).**

|                                             |                                                                 |
|---------------------------------------------|-----------------------------------------------------------------|
| Identification code                         | S1_CP                                                           |
| Empirical formula                           | C <sub>14</sub> H <sub>28</sub> N <sub>2</sub> O <sub>2</sub> S |
| Formula weight                              | 288.44                                                          |
| Temperature/K                               | 100.0                                                           |
| Crystal system                              | monoclinic                                                      |
| Space group                                 | P2 <sub>1</sub>                                                 |
| a/Å                                         | 6.0845(2)                                                       |
| b/Å                                         | 16.9812(6)                                                      |
| c/Å                                         | 7.8504(2)                                                       |
| α/°                                         | 90                                                              |
| β/°                                         | 99.469(2)                                                       |
| γ/°                                         | 90                                                              |
| Volume/Å <sup>3</sup>                       | 800.07(4)                                                       |
| Z                                           | 2                                                               |
| ρ <sub>calc</sub> /cm <sup>3</sup>          | 1.197                                                           |
| μ/mm <sup>-1</sup>                          | 1.800                                                           |
| F(000)                                      | 316.0                                                           |
| Crystal size/mm <sup>3</sup>                | 0.08 × 0.05 × 0.04                                              |
| Radiation                                   | CuKα (λ = 1.54178)                                              |
| 2θ range for data collection/°              | 10.418 to 159.908                                               |
| Index ranges                                | -6 ≤ h ≤ 7, -21 ≤ k ≤ 20, -10 ≤ l ≤ 10                          |
| Reflections collected                       | 11983                                                           |
| Independent reflections                     | 3300 [R <sub>int</sub> = 0.0669, R <sub>sigma</sub> = 0.0544]   |
| Data/restraints/parameters                  | 3300/1/179                                                      |
| Goodness-of-fit on F <sup>2</sup>           | 1.034                                                           |
| Final R indexes [I ≥ 2σ (I)]                | R <sub>1</sub> = 0.0423, wR <sub>2</sub> = 0.0916               |
| Final R indexes [all data]                  | R <sub>1</sub> = 0.0475, wR <sub>2</sub> = 0.0949               |
| Largest diff. peak/hole / e Å <sup>-3</sup> | 0.32/-0.35                                                      |
| Flack parameter                             | 0.088(15)                                                       |

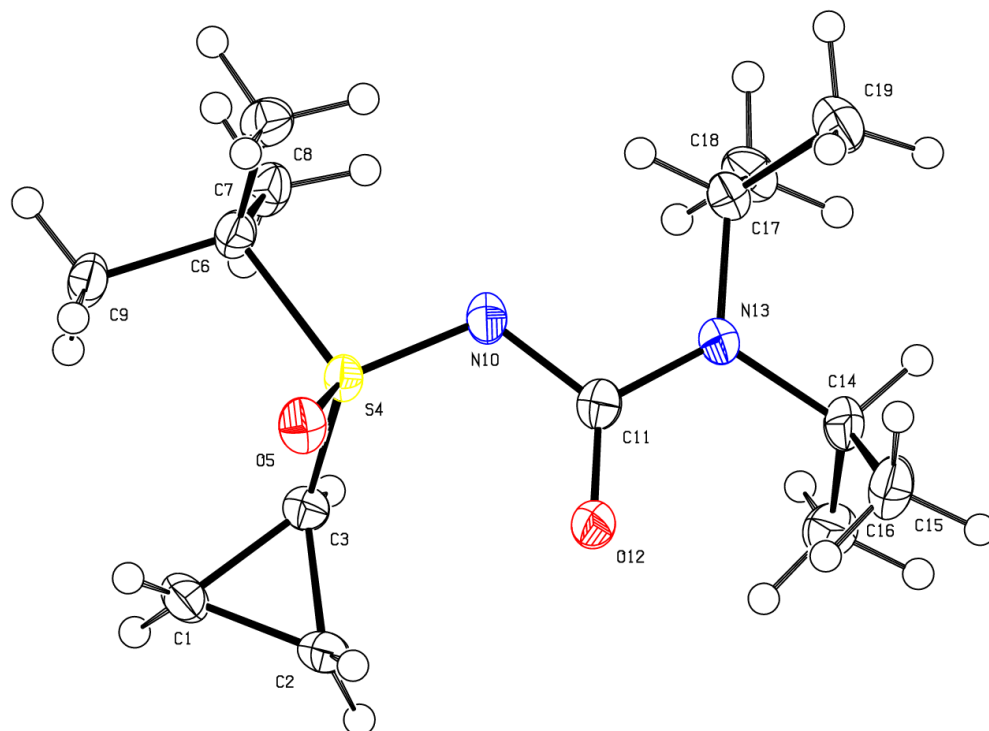

Fig.1. Ellipsoid plot of **S1\_CP (4a)**. Anisotropic displacement parameters were drawn at 50% probability level. CCDC deposition Number: 2243800

**Table 1 Crystal data and structure refinement for 2136B (S6a).**

|                                             |                                                                  |
|---------------------------------------------|------------------------------------------------------------------|
| Identification code                         | 2136B                                                            |
| Empirical formula                           | C <sub>13</sub> H <sub>19</sub> FN <sub>2</sub> O <sub>2</sub> S |
| Formula weight                              | 286.36                                                           |
| Temperature/K                               | 100.00                                                           |
| Crystal system                              | monoclinic                                                       |
| Space group                                 | P2 <sub>1</sub>                                                  |
| a/Å                                         | 9.4950(2)                                                        |
| b/Å                                         | 10.7311(2)                                                       |
| c/Å                                         | 14.6795(2)                                                       |
| α/°                                         | 90                                                               |
| β/°                                         | 99.5221(6)                                                       |
| γ/°                                         | 90                                                               |
| Volume/Å <sup>3</sup>                       | 1475.11(5)                                                       |
| Z                                           | 4                                                                |
| ρ <sub>calc</sub> /cm <sup>3</sup>          | 1.289                                                            |
| μ/mm <sup>-1</sup>                          | 2.062                                                            |
| F(000)                                      | 608.0                                                            |
| Crystal size/mm <sup>3</sup>                | 0.54 × 0.25 × 0.11                                               |
| Radiation                                   | CuKα (λ = 1.54178)                                               |
| 2θ range for data collection/°              | 6.104 to 160.002                                                 |
| Index ranges                                | -11 ≤ h ≤ 12, -13 ≤ k ≤ 13, -18 ≤ l ≤ 18                         |
| Reflections collected                       | 20802                                                            |
| Independent reflections                     | 5969 [R <sub>int</sub> = 0.0360, R <sub>sigma</sub> = 0.0428]    |
| Data/restraints/parameters                  | 5969/1/351                                                       |
| Goodness-of-fit on F <sup>2</sup>           | 1.049                                                            |
| Final R indexes [I ≥ 2σ (I)]                | R <sub>1</sub> = 0.0274, wR <sub>2</sub> = 0.0719                |
| Final R indexes [all data]                  | R <sub>1</sub> = 0.0287, wR <sub>2</sub> = 0.0729                |
| Largest diff. peak/hole / e Å <sup>-3</sup> | 0.18/-0.35                                                       |
| Flack parameter                             | 0.046(6)                                                         |

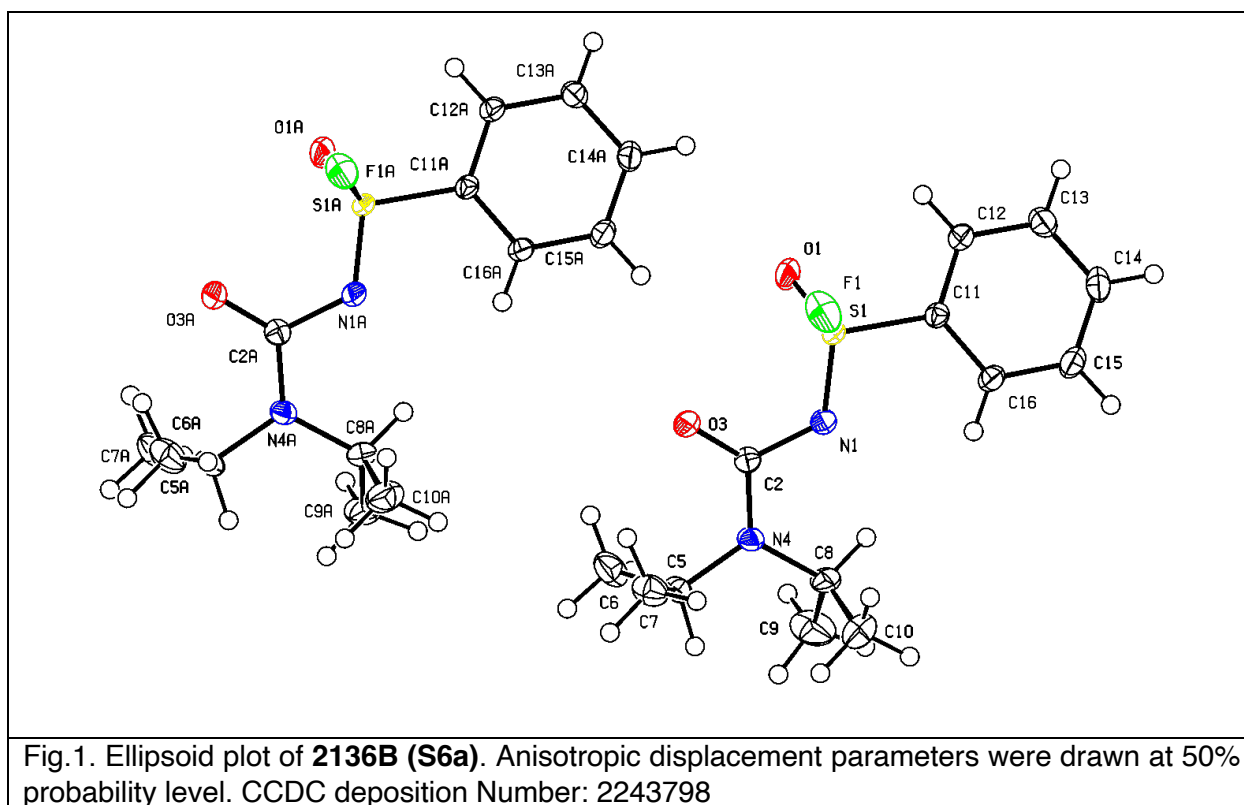

**Table 1 Crystal data and structure refinement for 2172 (7k).**

|                                             |                                                                 |
|---------------------------------------------|-----------------------------------------------------------------|
| Identification code                         | 2172                                                            |
| Empirical formula                           | C <sub>14</sub> H <sub>22</sub> N <sub>2</sub> O <sub>2</sub> S |
| Formula weight                              | 282.39                                                          |
| Temperature/K                               | 291.0                                                           |
| Crystal system                              | orthorhombic                                                    |
| Space group                                 | P2 <sub>1</sub> 2 <sub>1</sub> 2 <sub>1</sub>                   |
| a/Å                                         | 8.1841(1)                                                       |
| b/Å                                         | 11.5106(2)                                                      |
| c/Å                                         | 16.2095(3)                                                      |
| α/°                                         | 90                                                              |
| β/°                                         | 90                                                              |
| γ/°                                         | 90                                                              |
| Volume/Å <sup>3</sup>                       | 1527.00(4)                                                      |
| Z                                           | 4                                                               |
| ρ <sub>calc</sub> /cm <sup>3</sup>          | 1.228                                                           |
| μ/mm <sup>-1</sup>                          | 1.885                                                           |
| F(000)                                      | 608.0                                                           |
| Crystal size/mm <sup>3</sup>                | 0.24 × 0.08 × 0.07                                              |
| Radiation                                   | CuKα (λ = 1.54178)                                              |
| 2θ range for data collection/°              | 9.424 to 160.112                                                |
| Index ranges                                | -10 ≤ h ≤ 9, -13 ≤ k ≤ 13, -20 ≤ l ≤ 19                         |
| Reflections collected                       | 18369                                                           |
| Independent reflections                     | 3230 [R <sub>int</sub> = 0.0684, R <sub>sigma</sub> = 0.0381]   |
| Data/restraints/parameters                  | 3230/514/294                                                    |
| Goodness-of-fit on F <sup>2</sup>           | 1.072                                                           |
| Final R indexes [I ≥ 2σ (I)]                | R <sub>1</sub> = 0.0317, wR <sub>2</sub> = 0.0685               |
| Final R indexes [all data]                  | R <sub>1</sub> = 0.0379, wR <sub>2</sub> = 0.0721               |
| Largest diff. peak/hole / e Å <sup>-3</sup> | 0.18/-0.27                                                      |
| Flack parameter                             | 0.039(10)                                                       |

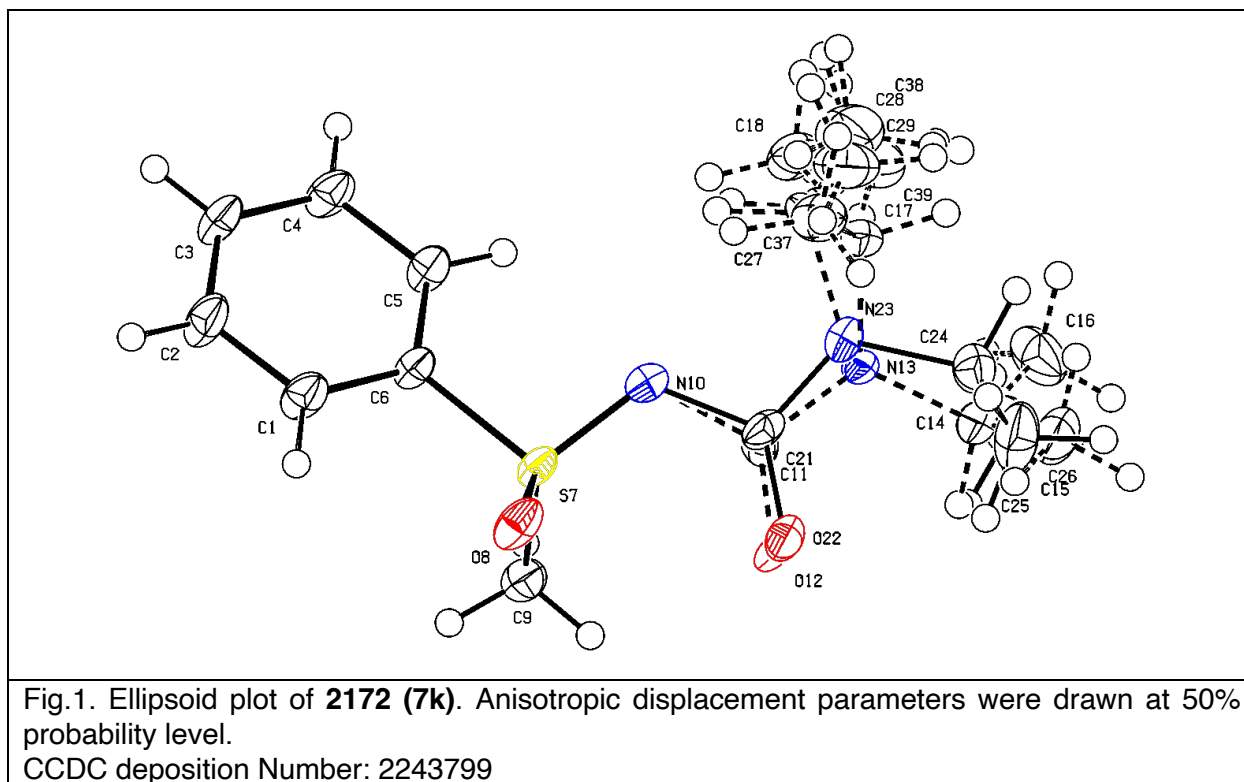

**Table 1 Crystal data and structure refinement for 2174B (7a).**

|                                             |                                                                                                                                       |
|---------------------------------------------|---------------------------------------------------------------------------------------------------------------------------------------|
| Identification code                         | 2174B                                                                                                                                 |
| Empirical formula                           | C <sub>19.165</sub> H <sub>23.25</sub> Cl <sub>1.42</sub> N <sub>2</sub> O <sub>2</sub> S                                             |
| Moiety formula                              | C <sub>19</sub> H <sub>23</sub> ClN <sub>2</sub> O <sub>2</sub> S, 0.086(CHCl <sub>3</sub> ), 0.079(CH <sub>2</sub> Cl <sub>2</sub> ) |
| Formula weight                              | 395.96                                                                                                                                |
| Temperature/K                               | 291.0                                                                                                                                 |
| Crystal system                              | hexagonal                                                                                                                             |
| Space group                                 | P6 <sub>3</sub>                                                                                                                       |
| a/Å                                         | 23.8178(4)                                                                                                                            |
| b/Å                                         | 23.8178(4)                                                                                                                            |
| c/Å                                         | 6.0872(2)                                                                                                                             |
| α/°                                         | 90                                                                                                                                    |
| β/°                                         | 90                                                                                                                                    |
| γ/°                                         | 120                                                                                                                                   |
| Volume/Å <sup>3</sup>                       | 2990.55(14)                                                                                                                           |
| Z                                           | 6                                                                                                                                     |
| ρ <sub>calc</sub> /cm <sup>3</sup>          | 1.319                                                                                                                                 |
| μ/mm <sup>-1</sup>                          | 3.313                                                                                                                                 |
| F(000)                                      | 1250.0                                                                                                                                |
| Crystal size/mm <sup>3</sup>                | 0.56 × 0.12 × 0.1                                                                                                                     |
| Radiation                                   | CuKα (λ = 1.54178)                                                                                                                    |
| 2θ range for data collection/°              | 4.284 to 160.17                                                                                                                       |
| Index ranges                                | -29 ≤ h ≤ 30, -30 ≤ k ≤ 27, -7 ≤ l ≤ 7                                                                                                |
| Reflections collected                       | 51722                                                                                                                                 |
| Independent reflections                     | 4305 [R <sub>int</sub> = 0.0685, R <sub>sigma</sub> = 0.0274]                                                                         |
| Data/restraints/parameters                  | 4305/131/284                                                                                                                          |
| Goodness-of-fit on F <sup>2</sup>           | 1.046                                                                                                                                 |
| Final R indexes [I ≥ 2σ (I)]                | R <sub>1</sub> = 0.0343, wR <sub>2</sub> = 0.0854                                                                                     |
| Final R indexes [all data]                  | R <sub>1</sub> = 0.0366, wR <sub>2</sub> = 0.0877                                                                                     |
| Largest diff. peak/hole / e Å <sup>-3</sup> | 0.33/-0.43                                                                                                                            |
| Flack parameter                             | 0.050(6)                                                                                                                              |

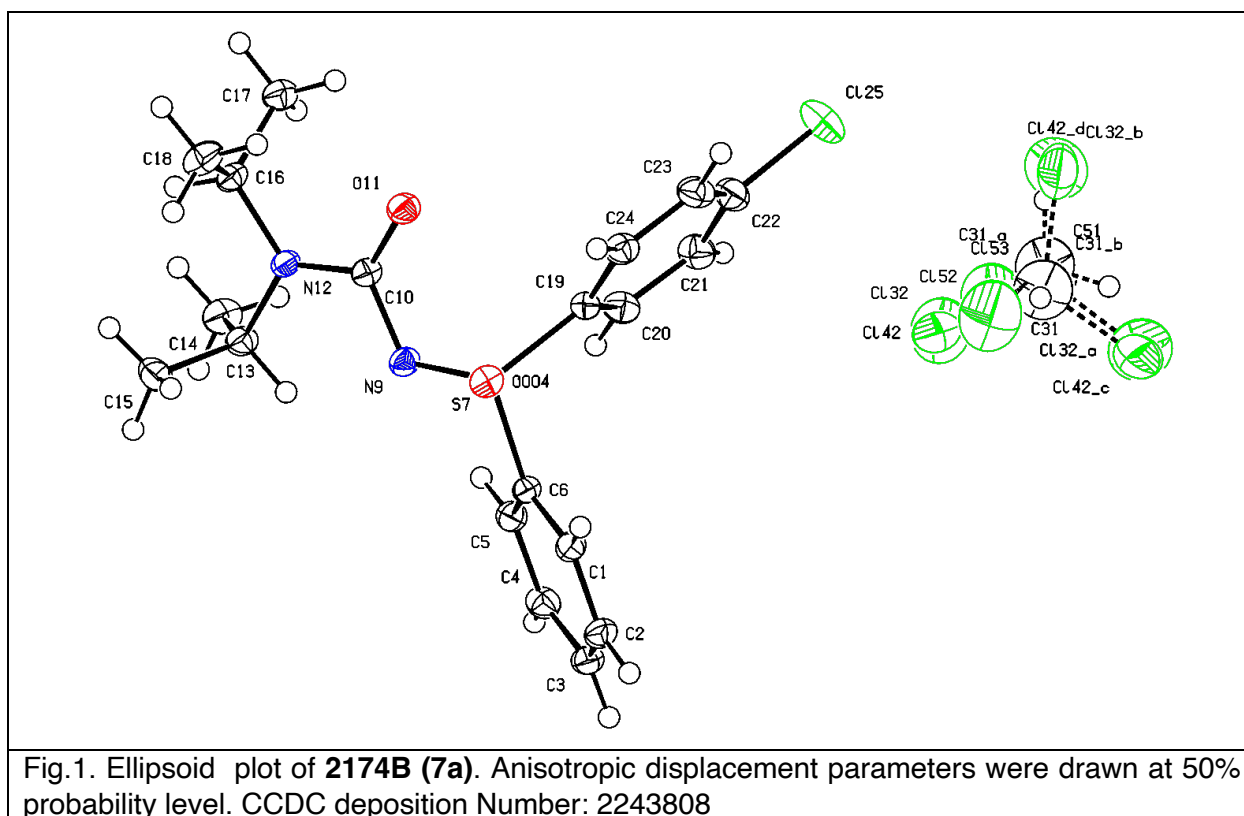

**Table 1 Crystal data and structure refinement for 2191C (7i) .**

|                                             |                                                                 |
|---------------------------------------------|-----------------------------------------------------------------|
| Identification code                         | 2191C                                                           |
| Empirical formula                           | C <sub>16</sub> H <sub>26</sub> N <sub>2</sub> O <sub>2</sub> S |
| Formula weight                              | 310.45                                                          |
| Temperature/K                               | 100.0                                                           |
| Crystal system                              | monoclinic                                                      |
| Space group                                 | P2 <sub>1</sub>                                                 |
| a/Å                                         | 6.11810(10)                                                     |
| b/Å                                         | 19.5419(4)                                                      |
| c/Å                                         | 14.1505(3)                                                      |
| α/°                                         | 90                                                              |
| β/°                                         | 92.7190(10)                                                     |
| γ/°                                         | 90                                                              |
| Volume/Å <sup>3</sup>                       | 1689.92(6)                                                      |
| Z                                           | 4                                                               |
| ρ <sub>calc</sub> /cm <sup>3</sup>          | 1.220                                                           |
| μ/mm <sup>-1</sup>                          | 1.747                                                           |
| F(000)                                      | 672.0                                                           |
| Crystal size/mm <sup>3</sup>                | 0.34 × 0.1 × 0.06                                               |
| Radiation                                   | CuKα (λ = 1.54178)                                              |
| 2θ range for data collection/°              | 6.252 to 159.81                                                 |
| Index ranges                                | -7 ≤ h ≤ 7, -24 ≤ k ≤ 24, -15 ≤ l ≤ 17                          |
| Reflections collected                       | 47117                                                           |
| Independent reflections                     | 7106 [R <sub>int</sub> = 0.0972, R <sub>sigma</sub> = 0.0478]   |
| Data/restraints/parameters                  | 7106/1/391                                                      |
| Goodness-of-fit on F <sup>2</sup>           | 1.064                                                           |
| Final R indexes [I ≥ 2σ (I)]                | R <sub>1</sub> = 0.0375, wR <sub>2</sub> = 0.0866               |
| Final R indexes [all data]                  | R <sub>1</sub> = 0.0446, wR <sub>2</sub> = 0.0912               |
| Largest diff. peak/hole / e Å <sup>-3</sup> | 0.28/-0.43                                                      |
| Flack parameter                             | 0.069(8)                                                        |

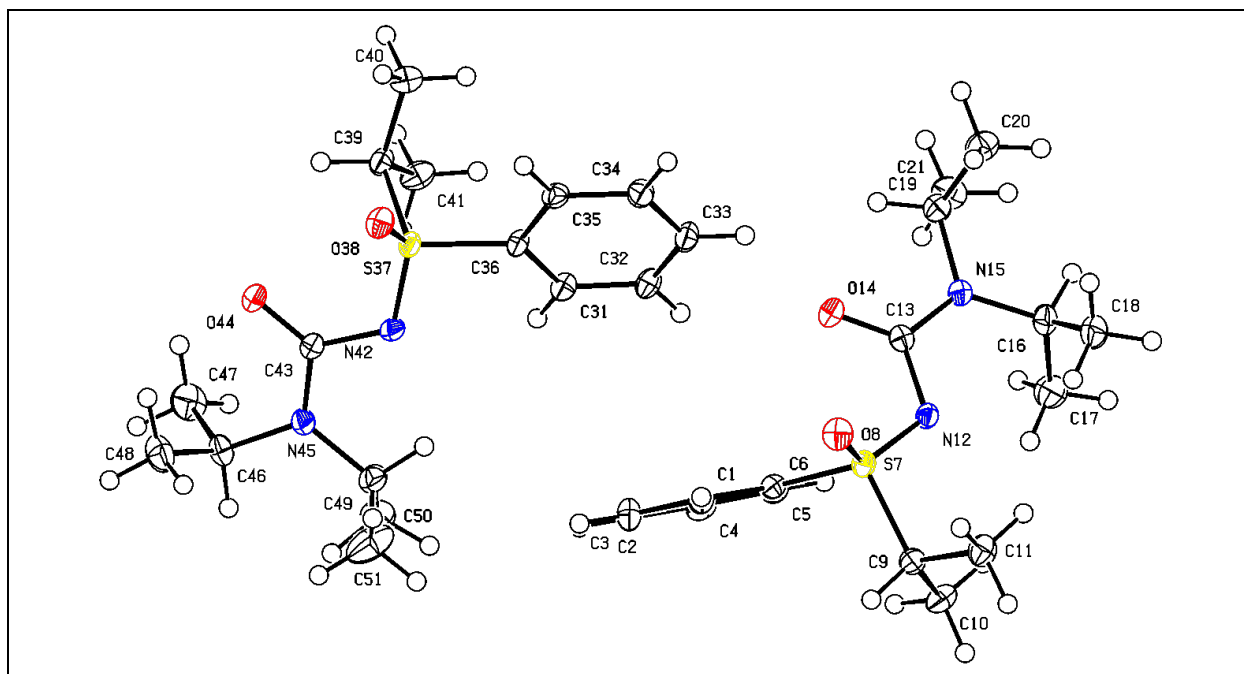

Fig.1. Ellipsoid plot of **2191C (7i)**. Anisotropic displacement parameters were drawn at 50% probability level. CCDC deposition Number: 2243802

**Table 1 Crystal data and structure refinement for 2238B (7f).**

|                                             |                                                                              |
|---------------------------------------------|------------------------------------------------------------------------------|
| Identification code                         | 2238B                                                                        |
| Empirical formula                           | C <sub>17</sub> H <sub>22</sub> N <sub>2</sub> O <sub>2</sub> S <sub>2</sub> |
| Formula weight                              | 350.48                                                                       |
| Temperature/K                               | 100.0                                                                        |
| Crystal system                              | orthorhombic                                                                 |
| Space group                                 | P2 <sub>1</sub> 2 <sub>1</sub> 2 <sub>1</sub>                                |
| a/Å                                         | 8.1124(2)                                                                    |
| b/Å                                         | 11.2478(2)                                                                   |
| c/Å                                         | 20.2004(3)                                                                   |
| α/°                                         | 90                                                                           |
| β/°                                         | 90                                                                           |
| γ/°                                         | 90                                                                           |
| Volume/Å <sup>3</sup>                       | 1843.22(6)                                                                   |
| Z                                           | 4                                                                            |
| ρ <sub>calc</sub> /cm <sup>3</sup>          | 1.263                                                                        |
| μ/mm <sup>-1</sup>                          | 2.699                                                                        |
| F(000)                                      | 744.0                                                                        |
| Crystal size/mm <sup>3</sup>                | 0.6 × 0.37 × 0.09                                                            |
| Radiation                                   | CuKα (λ = 1.54178)                                                           |
| 2θ range for data collection/°              | 8.754 to 160.352                                                             |
| Index ranges                                | -9 ≤ h ≤ 9, -14 ≤ k ≤ 14, -25 ≤ l ≤ 23                                       |
| Reflections collected                       | 23943                                                                        |
| Independent reflections                     | 3881 [R <sub>int</sub> = 0.0393, R <sub>sigma</sub> = 0.0261]                |
| Data/restraints/parameters                  | 3881/0/212                                                                   |
| Goodness-of-fit on F <sup>2</sup>           | 1.047                                                                        |
| Final R indexes [I ≥ 2σ (I)]                | R <sub>1</sub> = 0.0226, wR <sub>2</sub> = 0.0560                            |
| Final R indexes [all data]                  | R <sub>1</sub> = 0.0234, wR <sub>2</sub> = 0.0564                            |
| Largest diff. peak/hole / e Å <sup>-3</sup> | 0.21/-0.30                                                                   |
| Flack parameter                             | 0.025(5)                                                                     |

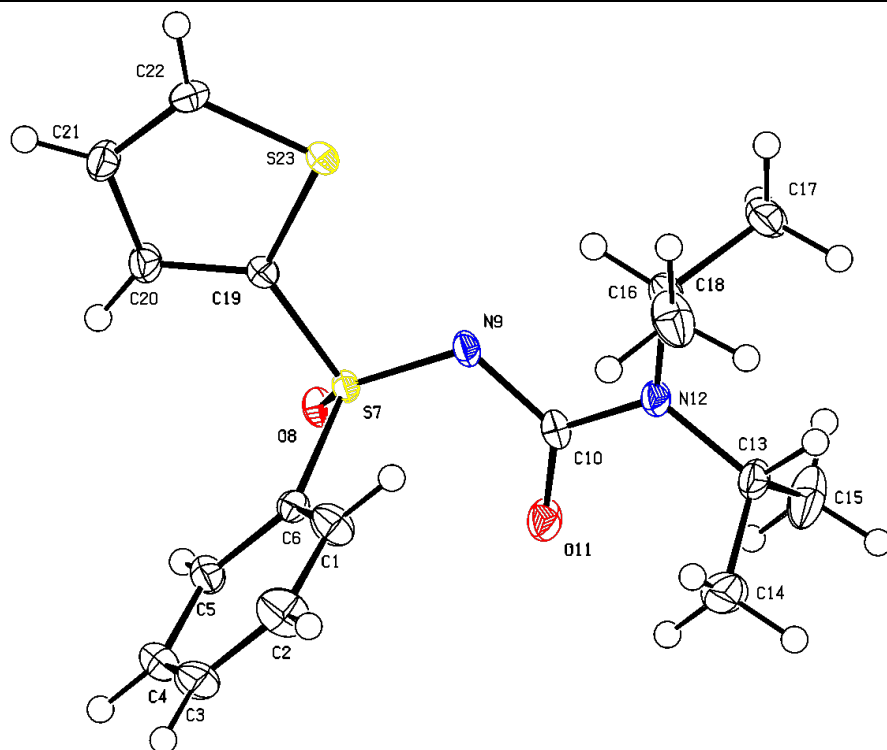

Fig.1. Ellipsoid plot of **2238B (7f)**. Anisotropic displacement parameters were drawn at 50% probability level. CCDC deposition Number: 2243806

**Table 1 Crystal data and structure refinement for 4121A (7I).**

|                                             |                                                                 |
|---------------------------------------------|-----------------------------------------------------------------|
| Identification code                         | 4121A                                                           |
| Empirical formula                           | C <sub>16</sub> H <sub>24</sub> N <sub>2</sub> O <sub>2</sub> S |
| Formula weight                              | 308.43                                                          |
| Temperature/K                               | 100.00                                                          |
| Crystal system                              | orthorhombic                                                    |
| Space group                                 | P212121                                                         |
| a/Å                                         | 8.1411(2)                                                       |
| b/Å                                         | 10.6363(3)                                                      |
| c/Å                                         | 19.6540(6)                                                      |
| α/°                                         | 90                                                              |
| β/°                                         | 90                                                              |
| γ/°                                         | 90                                                              |
| Volume/Å <sup>3</sup>                       | 1701.86(8)                                                      |
| Z                                           | 4                                                               |
| ρ <sub>calc</sub> /cm <sup>3</sup>          | 1.204                                                           |
| μ/mm <sup>-1</sup>                          | 1.734                                                           |
| F(000)                                      | 664.0                                                           |
| Crystal size/mm <sup>3</sup>                | 0.45 × 0.3 × 0.09                                               |
| Radiation                                   | CuKα (λ = 1.54178)                                              |
| 2θ range for data collection/°              | 8.998 to 158.808                                                |
| Index ranges                                | -10 ≤ h ≤ 10, -13 ≤ k ≤ 12, -24 ≤ l ≤ 25                        |
| Reflections collected                       | 40568                                                           |
| Independent reflections                     | 3645 [R <sub>int</sub> = 0.0419, R <sub>sigma</sub> = 0.0207]   |
| Data/restraints/parameters                  | 3645/0/202                                                      |
| Goodness-of-fit on F <sup>2</sup>           | 1.040                                                           |
| Final R indexes [I ≥ 2σ (I)]                | R <sub>1</sub> = 0.0231, wR <sub>2</sub> = 0.0607               |
| Final R indexes [all data]                  | R <sub>1</sub> = 0.0233, wR <sub>2</sub> = 0.0609               |
| Largest diff. peak/hole / e Å <sup>-3</sup> | 0.23/-0.26                                                      |
| Flack parameter                             | 0.046(3)                                                        |

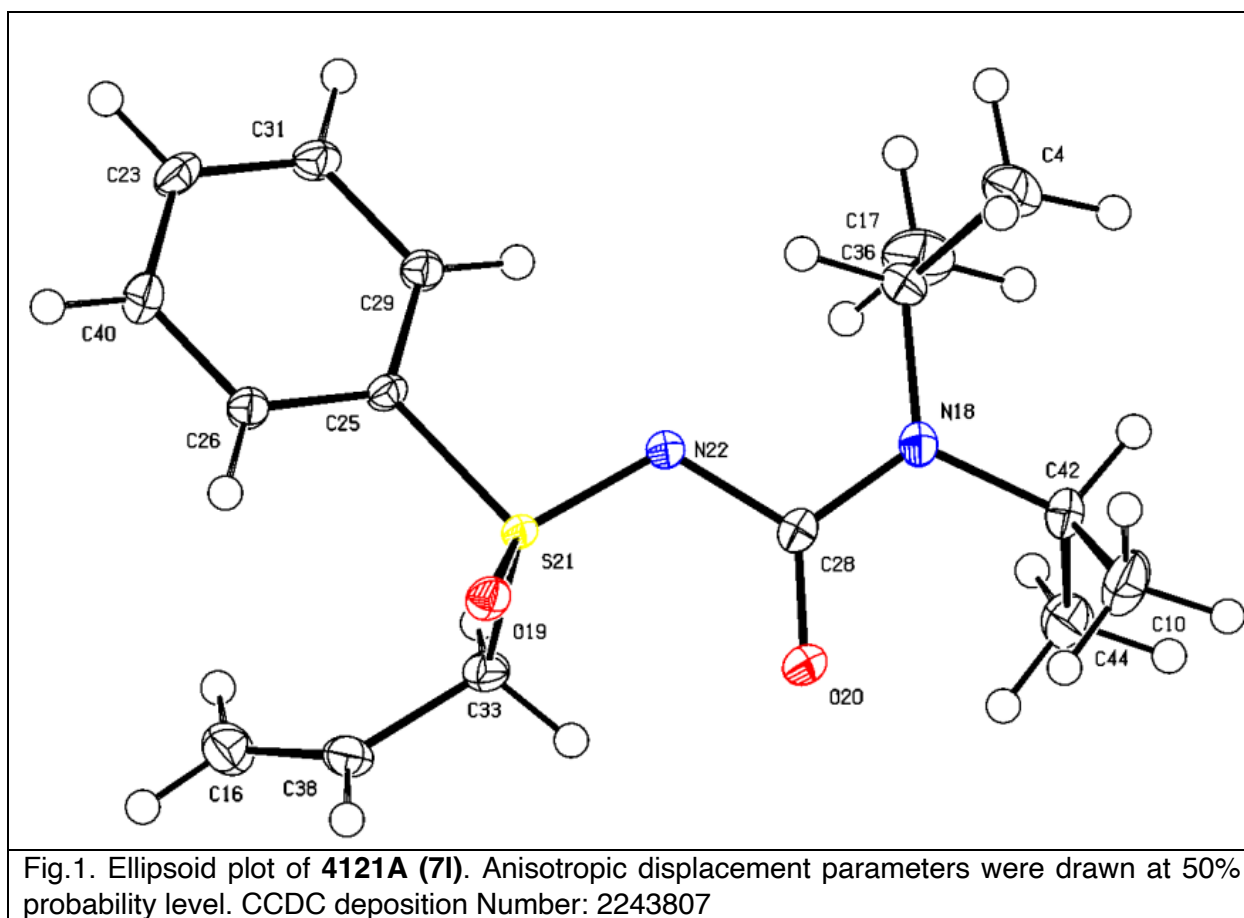

**Table 1 Crystal data and structure refinement for 4184A (7e).**

|                                             |                                                                 |
|---------------------------------------------|-----------------------------------------------------------------|
| Identification code                         | 4184A                                                           |
| Empirical formula                           | C <sub>19</sub> H <sub>26</sub> N <sub>4</sub> O <sub>3</sub> S |
| Formula weight                              | 390.50                                                          |
| Temperature/K                               | 100.00                                                          |
| Crystal system                              | hexagonal                                                       |
| Space group                                 | P6 <sub>5</sub>                                                 |
| a/Å                                         | 23.6795(3)                                                      |
| b/Å                                         | 23.6795(3)                                                      |
| c/Å                                         | 6.2938(1)                                                       |
| α/°                                         | 90                                                              |
| β/°                                         | 90                                                              |
| γ/°                                         | 120                                                             |
| Volume/Å <sup>3</sup>                       | 3056.25(9)                                                      |
| Z                                           | 6                                                               |
| ρ <sub>calc</sub> /cm <sup>3</sup>          | 1.273                                                           |
| μ/mm <sup>-1</sup>                          | 1.629                                                           |
| F(000)                                      | 1248.0                                                          |
| Crystal size/mm <sup>3</sup>                | 0.6 × 0.03 × 0.02                                               |
| Radiation                                   | CuKα (λ = 1.54178)                                              |
| 2θ range for data collection/°              | 4.308 to 160.326                                                |
| Index ranges                                | -28 ≤ h ≤ 30, -30 ≤ k ≤ 29, -7 ≤ l ≤ 7                          |
| Reflections collected                       | 64029                                                           |
| Independent reflections                     | 4406 [R <sub>int</sub> = 0.0667, R <sub>sigma</sub> = 0.0270]   |
| Data/restraints/parameters                  | 4406/602/353                                                    |
| Goodness-of-fit on F <sup>2</sup>           | 1.040                                                           |
| Final R indexes [I ≥ 2σ (I)]                | R <sub>1</sub> = 0.0263, wR <sub>2</sub> = 0.0693               |
| Final R indexes [all data]                  | R <sub>1</sub> = 0.0271, wR <sub>2</sub> = 0.0698               |
| Largest diff. peak/hole / e Å <sup>-3</sup> | 0.14/-0.30                                                      |
| Flack parameter                             | 0.081(6)                                                        |

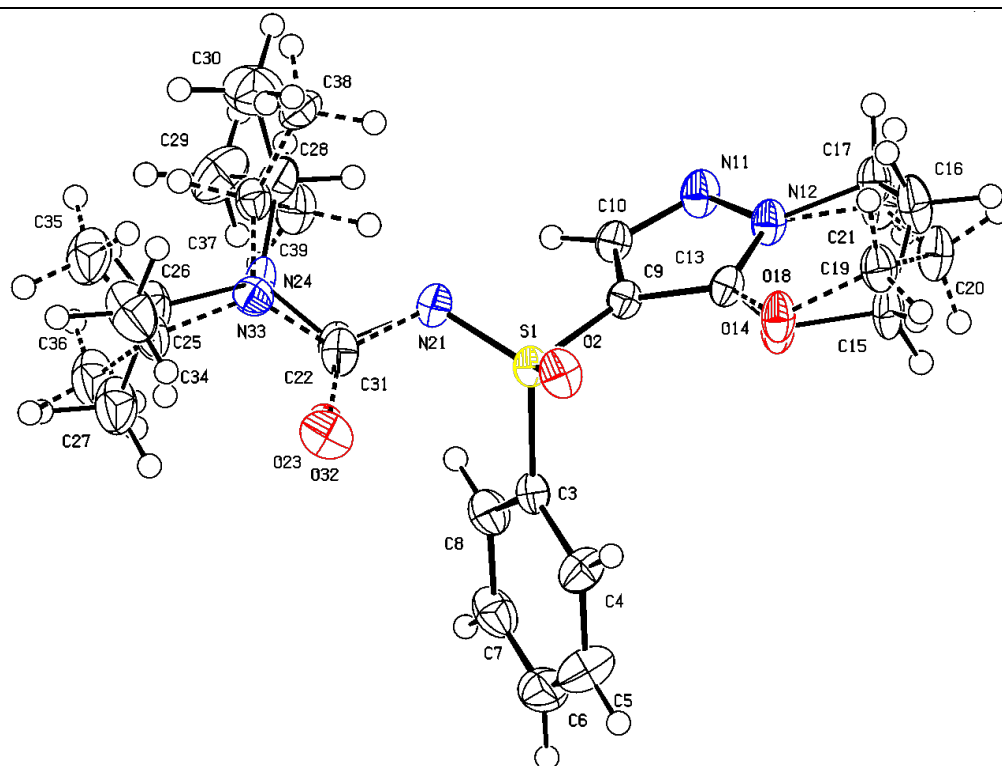

Fig.1. Ellipsoid plot of **4184A (7e)**. Anisotropic displacement parameters were drawn at 50% probability level. CCDC deposition Number: 2243805

**Table 1 Crystal data and structure refinement for 4292C (7d).**

|                                             |                                                                 |
|---------------------------------------------|-----------------------------------------------------------------|
| Identification code                         | 4292C                                                           |
| Empirical formula                           | C <sub>29</sub> H <sub>30</sub> N <sub>2</sub> O <sub>4</sub> S |
| Formula weight                              | 502.61                                                          |
| Temperature/K                               | 101.00                                                          |
| Crystal system                              | monoclinic                                                      |
| Space group                                 | P2 <sub>1</sub>                                                 |
| a/Å                                         | 6.3511(2)                                                       |
| b/Å                                         | 17.4886(6)                                                      |
| c/Å                                         | 11.6191(4)                                                      |
| α/°                                         | 90                                                              |
| β/°                                         | 96.1890(10)                                                     |
| γ/°                                         | 90                                                              |
| Volume/Å <sup>3</sup>                       | 1283.03(7)                                                      |
| Z                                           | 2                                                               |
| ρ <sub>calc</sub> /cm <sup>3</sup>          | 1.301                                                           |
| μ/mm <sup>-1</sup>                          | 1.428                                                           |
| F(000)                                      | 532.0                                                           |
| Crystal size/mm <sup>3</sup>                | 0.25 × 0.2 × 0.08                                               |
| Radiation                                   | CuKα (λ = 1.54178)                                              |
| 2θ range for data collection/°              | 9.174 to 159.728                                                |
| Index ranges                                | -7 ≤ h ≤ 8, -22 ≤ k ≤ 22, -14 ≤ l ≤ 14                          |
| Reflections collected                       | 25741                                                           |
| Independent reflections                     | 5160 [R <sub>int</sub> = 0.0418, R <sub>sigma</sub> = 0.0381]   |
| Data/restraints/parameters                  | 5160/1/329                                                      |
| Goodness-of-fit on F <sup>2</sup>           | 1.054                                                           |
| Final R indexes [I ≥ 2σ (I)]                | R <sub>1</sub> = 0.0307, wR <sub>2</sub> = 0.0788               |
| Final R indexes [all data]                  | R <sub>1</sub> = 0.0309, wR <sub>2</sub> = 0.0790               |
| Largest diff. peak/hole / e Å <sup>-3</sup> | 0.35/-0.28                                                      |
| Flack parameter                             | 0.157(5)                                                        |

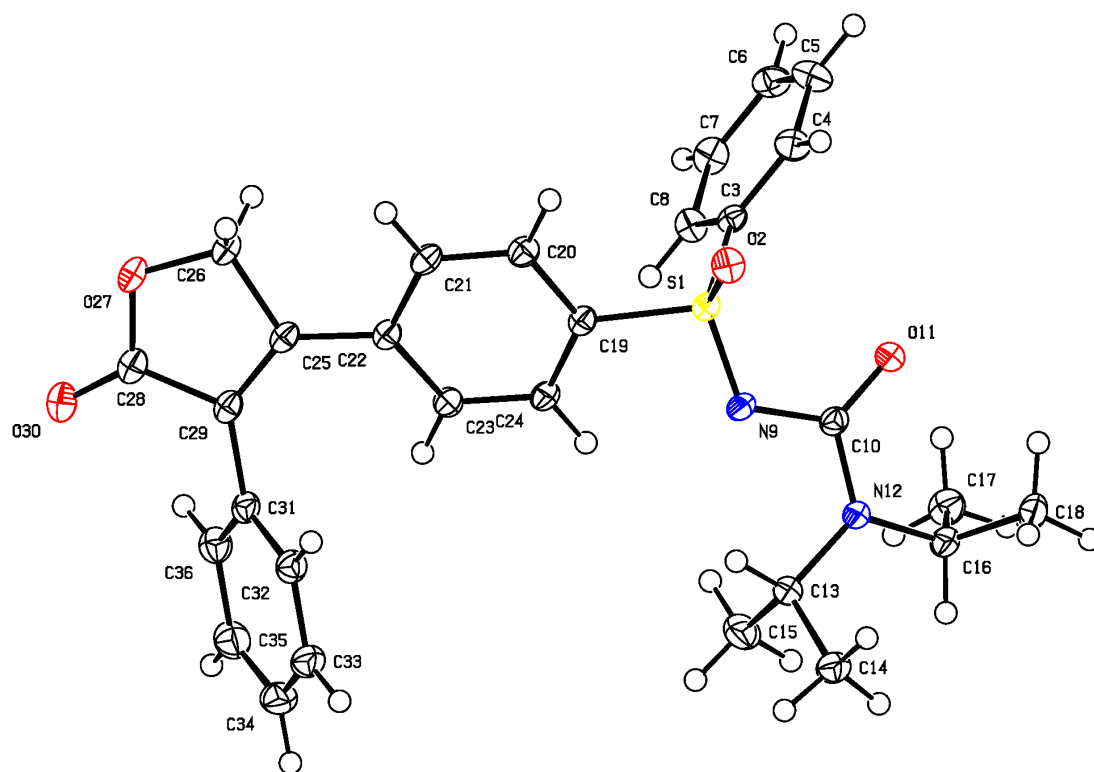

Fig.1. Ellipsoid plot of **4292C (7d)**. Anisotropic displacement parameters were drawn at 50% probability level.

CCDC deposition Number: 2243809

|                                                                       |                                                               |
|-----------------------------------------------------------------------|---------------------------------------------------------------|
| Table 1 Crystal data and structure refinement for <b>5115D (9a)</b> . |                                                               |
| Identification code                                                   | 5115D                                                         |
| Empirical formula                                                     | C <sub>10</sub> H <sub>9</sub> NOS <sub>2</sub>               |
| Formula weight                                                        | 223.30                                                        |
| Temperature/K                                                         | 100.00                                                        |
| Crystal system                                                        | orthorhombic                                                  |
| Space group                                                           | C2221                                                         |
| a/Å                                                                   | 6.0476(2)                                                     |
| b/Å                                                                   | 14.4290(4)                                                    |
| c/Å                                                                   | 22.6538(7)                                                    |
| α/°                                                                   | 90                                                            |
| β/°                                                                   | 90                                                            |
| γ/°                                                                   | 90                                                            |
| Volume/Å <sup>3</sup>                                                 | 1976.79(10)                                                   |
| Z                                                                     | 8                                                             |
| ρ <sub>calc</sub> /cm <sup>3</sup>                                    | 1.501                                                         |
| μ/mm <sup>-1</sup>                                                    | 4.582                                                         |
| F(000)                                                                | 928.0                                                         |
| Crystal size/mm <sup>3</sup>                                          | 0.22 × 0.15 × 0.06                                            |
| Radiation                                                             | CuKα (λ = 1.54178)                                            |
| 2θ range for data collection/°                                        | 12.878 to 159.214                                             |
| Index ranges                                                          | -7 ≤ h ≤ 7, -17 ≤ k ≤ 18, -28 ≤ l ≤ 28                        |
| Reflections collected                                                 | 18719                                                         |
| Independent reflections                                               | 2122 [R <sub>int</sub> = 0.0388, R <sub>sigma</sub> = 0.0252] |
| Data/restraints/parameters                                            | 2122/347/177                                                  |
| Goodness-of-fit on F <sup>2</sup>                                     | 1.085                                                         |
| Final R indexes [I ≥ 2σ (I)]                                          | R <sub>1</sub> = 0.0231, wR <sub>2</sub> = 0.0650             |
| Final R indexes [all data]                                            | R <sub>1</sub> = 0.0231, wR <sub>2</sub> = 0.0650             |
| Largest diff. peak/hole / e Å <sup>-3</sup>                           | 0.30/-0.32                                                    |
| Flack parameter                                                       | 0.074(5)                                                      |

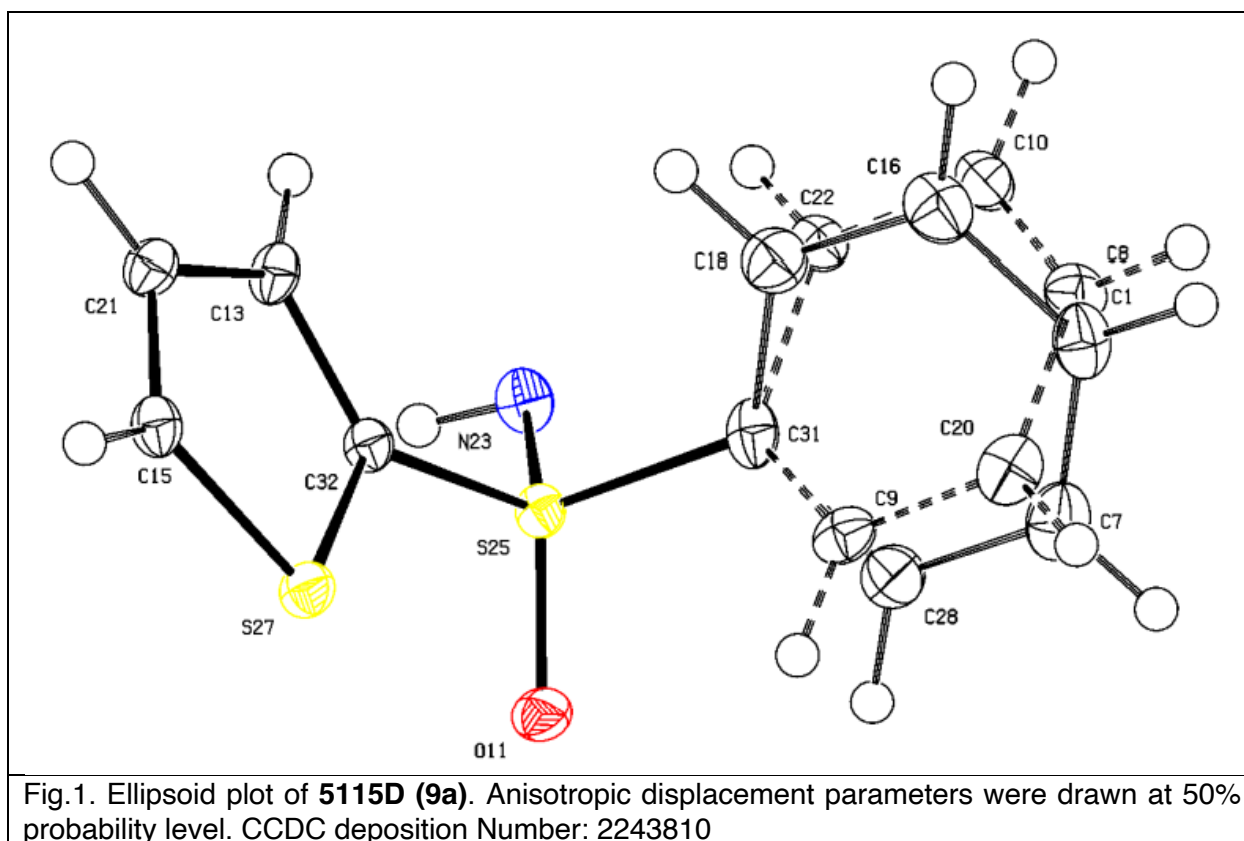

## XI. References

1. Barsamian, A. L., Wu, Z. & Blakemore, P. R. Enantioselective synthesis of  $\alpha$ -phenyl- and  $\alpha$ -(dimethylphenylsilyl)alkylboronic esters by ligand mediated stereoinductive reagent-controlled homologation using configurationally labile carbenoids. *Org. Biomol. Chem.* **13**, 3781-3786 (2015).
2. Bolm, C., Simic, O. & Martin, M. C2-symmetric bissulfoximines in palladium-catalyzed allylic alkylations. *Synlett* 1878-1880 (2001).
3. Gaillard, S., Papamichael, C., Dupas, G., Marsais, F. & Levacher, V. Ortho-lithiation of s-tert-butyl-s-phenylsulfoximines. New route to enantiopure sulfinamides via a de-tert-butylation reaction. *Tetrahedron* **61**, 8138-8147 (2005).
4. Ye, W., Zhang, L., Ni, C., Rong, J. & Hu, J. Stereoselective [3+2] cycloaddition of n-tert-butanefulfinyl imines to arynes facilitated by a removable phso2cf2 group: Synthesis and transformation of cyclic sulfoximines. *Chem. Commun. (Cambridge, U. K.)* **50**, 10596-10599 (2014).
5. Aota, Y., Kano, T. & Maruoka, K. Asymmetric synthesis of chiral sulfoximines through the s-alkylation of sulfinamides. *Angew. Chem., Int. Ed.* **58**, 17661-17665 (2019).
6. Aota, Y., Maeda, Y., Kano, T. & Maruoka, K. Efficient synthesis of cyclic sulfoximines from n-propargylsulfinamides through sulfur-carbon bond formation. *Chem. - Eur. J.* **25**, 15755-15758 (2019).
7. Greed, S., *et al.* Synthesis of highly enantioenriched sulfonimidoyl fluorides and sulfonimidamides by stereospecific sulfur-fluorine exchange (sufex) reaction. *Chem. Eur. J.* **26**, 12533-12538 (2020).
8. Maeda, Y., *et al.* Practical asymmetric synthesis of chiral sulfoximines via sulfur-selective alkylation. *J. Org. Chem.* **87**, 3652-3660 (2022).
9. Li, G., Qin, Z. & Radosevich, A. T. P(iii)/p(v)-catalyzed methylation of arylboronic acids and esters: Reductive c-n coupling with nitromethane as a methylamine surrogate. *J. Am. Chem. Soc.* **142**, 16205-16210 (2020).
10. Shavnya, A., Coffey, S. B., Smith, A. C. & Mascitti, V. Palladium-catalyzed sulfinylation of aryl and heteroaryl halides: Direct access to sulfones and sulfonamides. *Org. Lett.* **15**, 6226-6229 (2013).
11. Cui, J. J., *et al.* Structure based drug design of crizotinib (pf-02341066), a potent and selective dual inhibitor of mesenchymal-epithelial transition factor (c-met) kinase and anaplastic lymphoma kinase (alk). *J. Med. Chem.* **54**, 6342-6363 (2011).
12. Henze, H. R., Allen, B. B. & Leslie, W. B. Syntheses involving utilization of allylmagnesium bromide in the grignard reaction. *The Journal of Organic Chemistry* **7**, 326-335 (1942).
13. Li, H., *et al.*, Preparation of dihydroquinoline compounds useful as blocker of cd47/sirpa interaction. Patent WO2019042470 (2019).
14. Fan, M., Zhou, W., Jiang, Y. & Ma, D. Assembly of primary (hetero)arylamines via cui/oxalic diamide-catalyzed coupling of aryl chlorides and ammonia. *Org. Lett.* **17**, 5934-5937 (2015).

15. Palomo, C., *et al.* Synthesis of  $\beta$ -lactam scaffolds for ditopic peptidomimetics. *Org. Lett.* **9**, 101-104 (2007).
16. Krause, L., Herbst-Irmer, R., Sheldrick, G. M. & Stalke, D. Comparison of silver and molybdenum microfocus x-ray sources for single-crystal structure determination. *J. Appl. Crystallogr.* **48**, 3-10 (2015).
17. Sheldrick, G. M. Shelxt - integrated space-group and crystal-structure determination. *Acta Crystallogr A Found Adv* **71**, 3-8 (2015).
18. Sheldrick, G. M. Crystal structure refinement with shelxl. *Acta Crystallogr C Struct Chem* **71**, 3-8 (2015).
19. Dolomanov, O. V., Bourhis, L. J., Gildea, R. J., Howard, J. A. K. & Puschmann, H. Olex2: A complete structure solution, refinement and analysis program. *J. Appl. Crystallogr.* **42**, 339-341 (2009).
20. Spek, A. L. Checkcif validation alerts: What they mean and how to respond. *Acta Crystallographica Section E: Crystallographic Communications* **76**, 1-11 (2020).

## XII. Chiral HPLC chromatograms

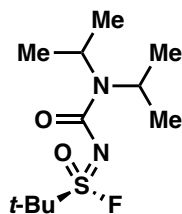

**Column:** Daicel Chiralpak IC; **Solvent:** *n*-hexane/IPA (70:30); **flowrate:** 1 mL/min  
**Chromatogram for *t*-BuSF: (rac)**

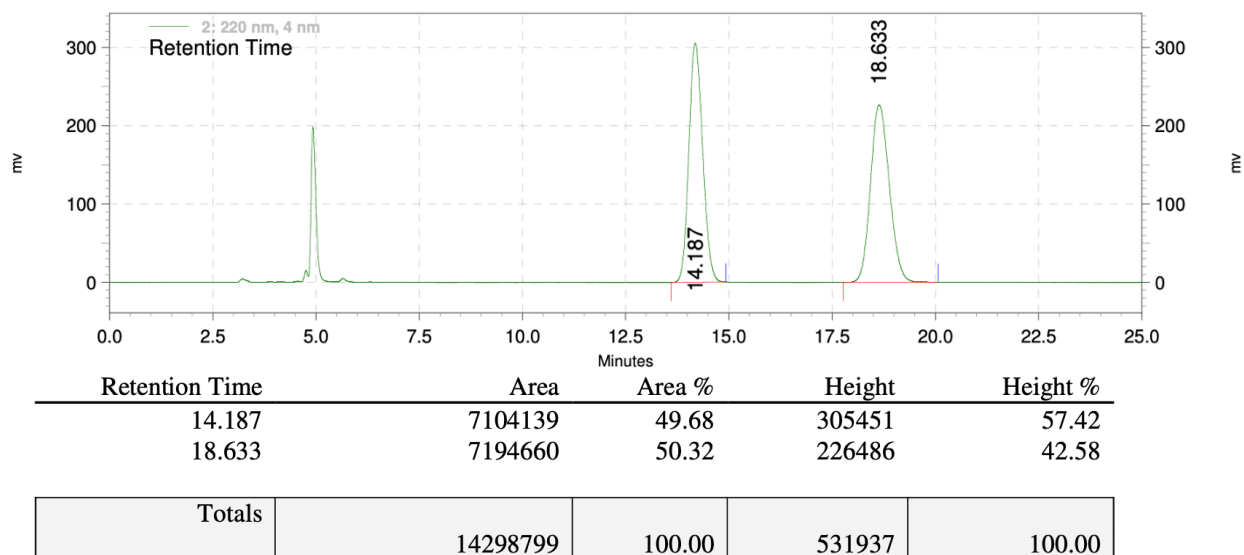

### Chromatogram for *t*-BuSF: (S)

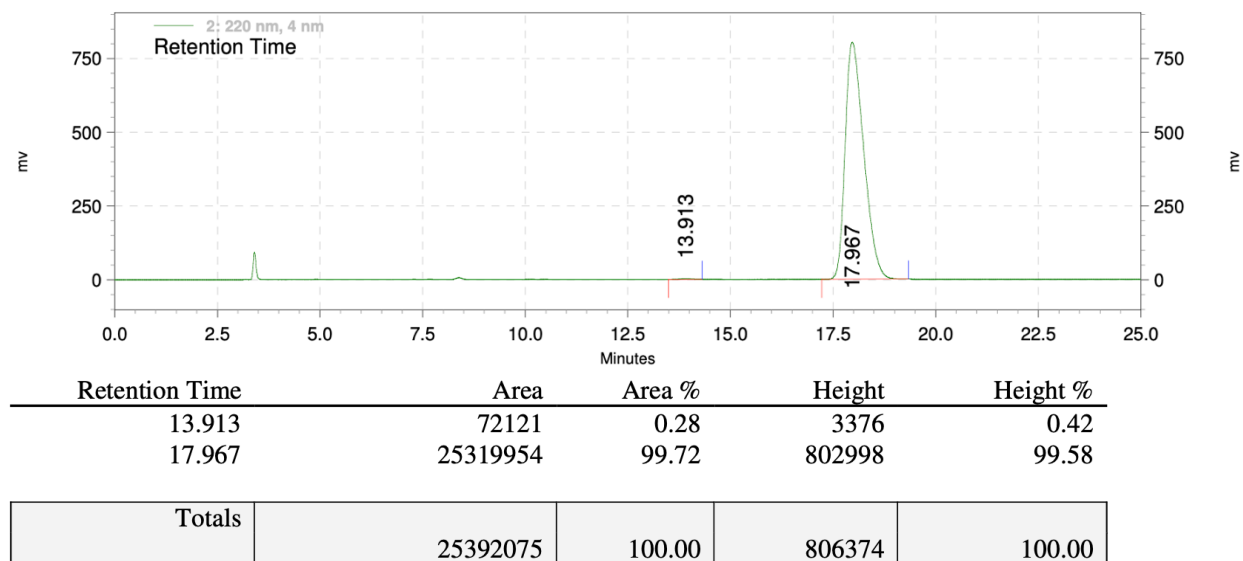

# Chromatogram for *t*-BuSF: (*R*)

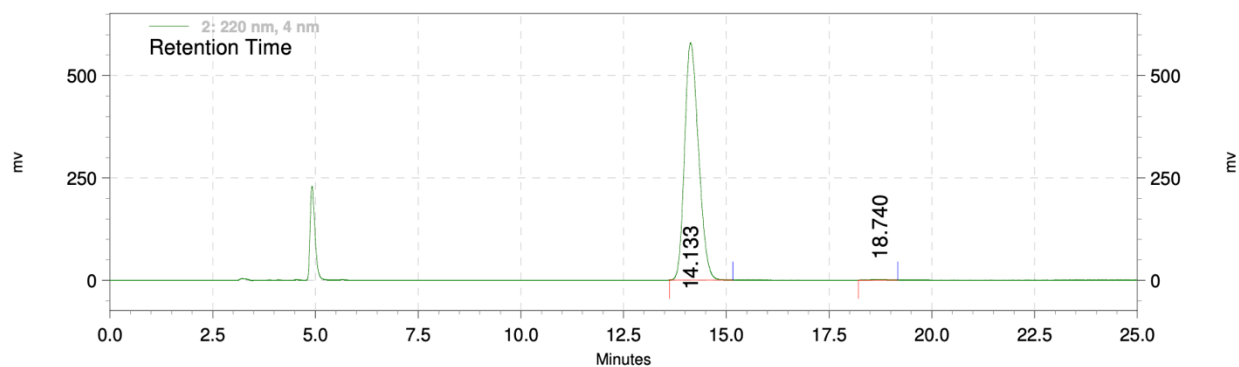

| Retention Time | Area     | Area % | Height | Height % |
|----------------|----------|--------|--------|----------|
| 14.133         | 13699269 | 99.71  | 579838 | 99.75    |
| 18.740         | 40200    | 0.29   | 1454   | 0.25     |

|        |          |        |        |        |
|--------|----------|--------|--------|--------|
| Totals | 13739469 | 100.00 | 581292 | 100.00 |
|--------|----------|--------|--------|--------|

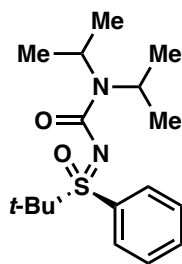

**Column:** Daicel Chiralpak IC; **Solvent:** *n*-hexane/IPA (70:30); **flowrate:** 1 mL/min  
**Chromatogram for sulfoximine: (*rac*)-2a**

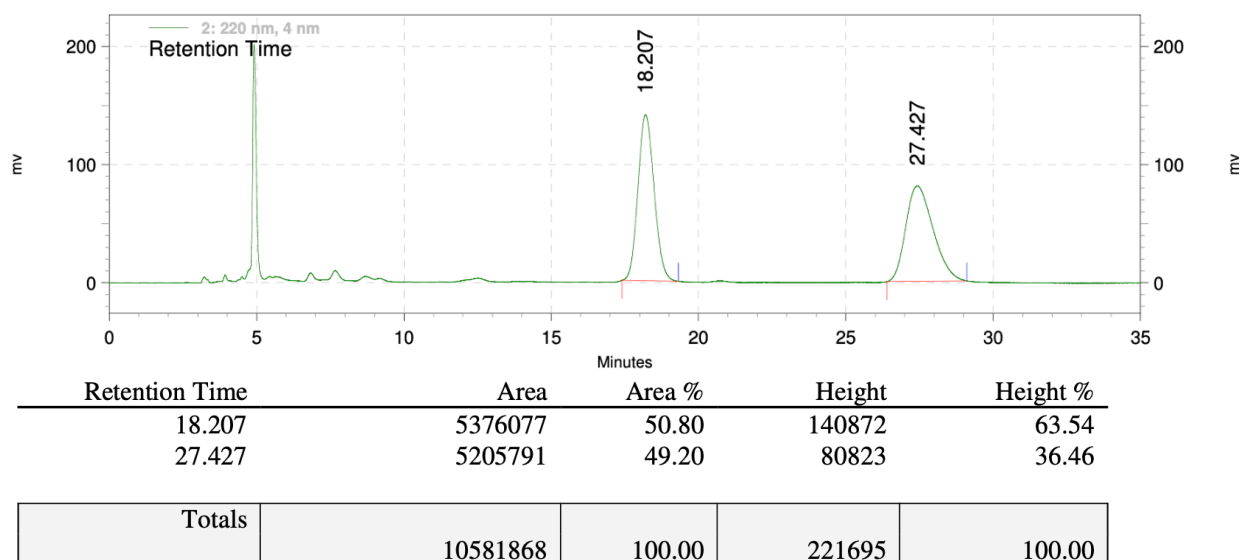

**Chromatogram for sulfoximine: (*R*)-2a**

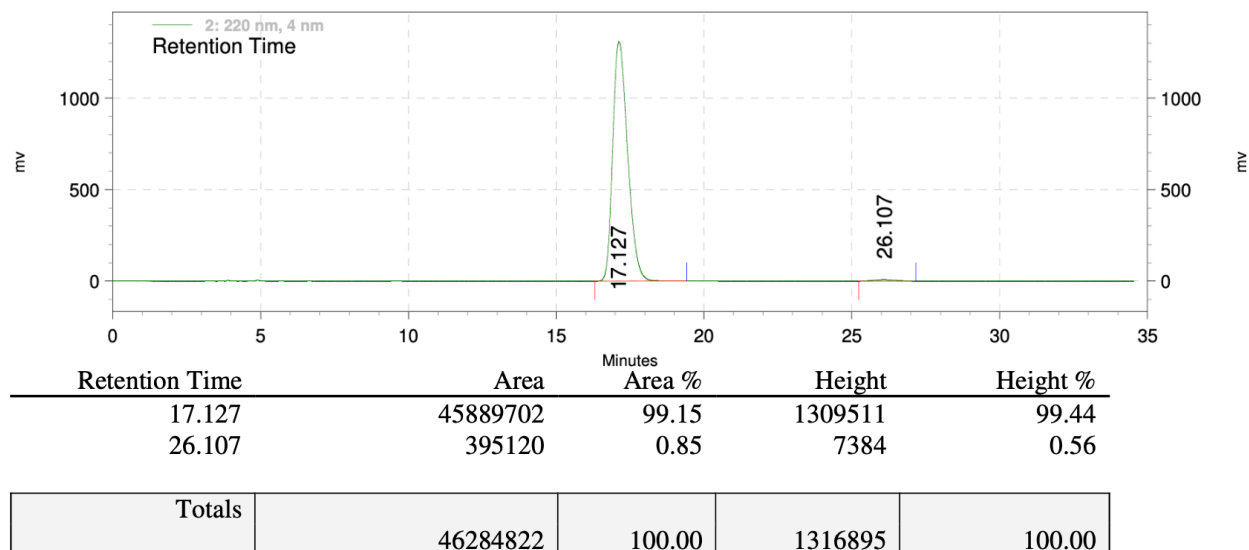

# Chromatogram for sulfoximine: (*R*)-2a after single recrystallization

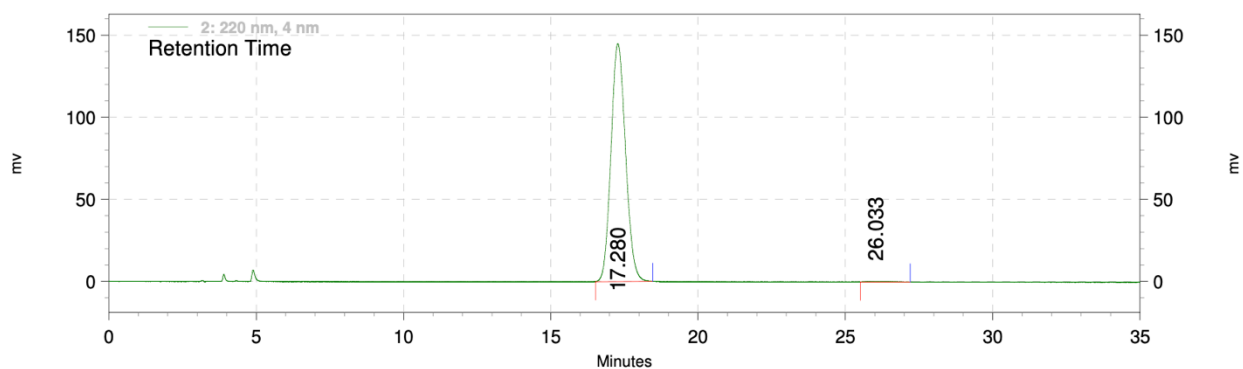

| Retention Time | Area    | Area % | Height | Height % |
|----------------|---------|--------|--------|----------|
| 17.280         | 4976663 | 99.72  | 144771 | 99.81    |
| 26.033         | 14018   | 0.28   | 276    | 0.19     |

|        |         |        |        |        |
|--------|---------|--------|--------|--------|
| Totals | 4990681 | 100.00 | 145047 | 100.00 |
|--------|---------|--------|--------|--------|

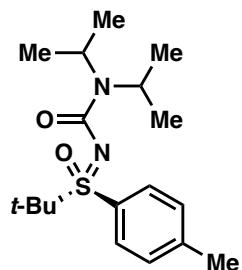

**Column:** Daicel Chiralpak IC; **Solvent:** *n*-hexane/IPA (70:30); **flowrate:** 1 mL/min  
**Chromatogram for sulfoximine: (rac)-2b**

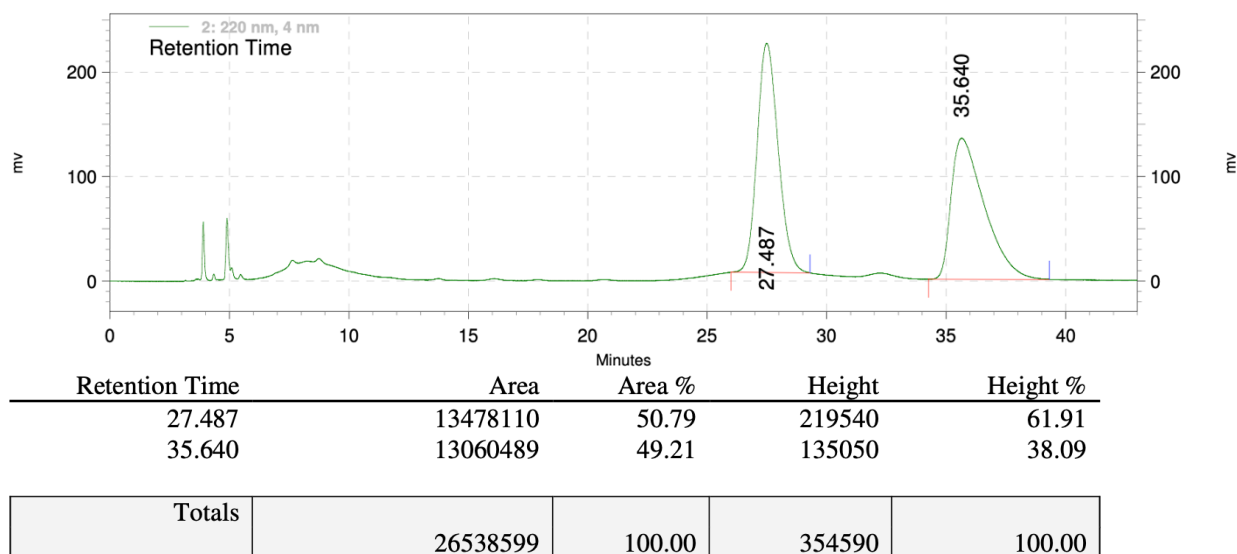

**Chromatogram for sulfoximine: (R)-2b**

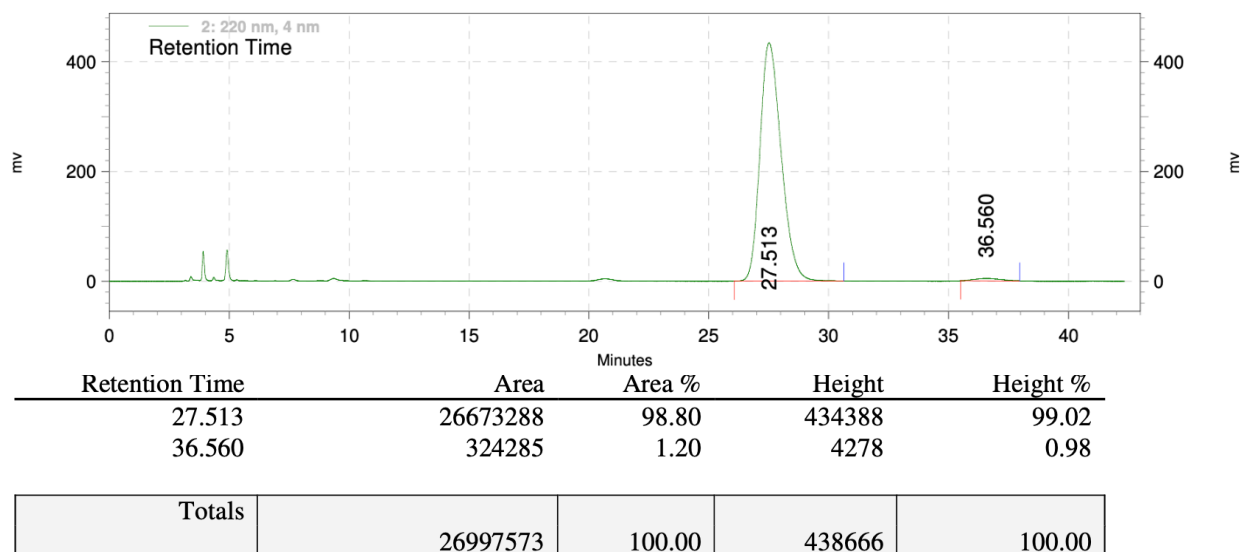

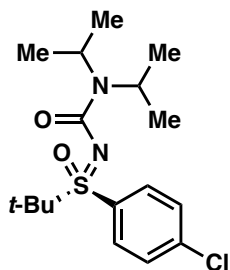

**Column:** Daicel Chiralpak IC; **Solvent:** *n*-hexane/IPA (70:30); **flowrate:** 1 mL/min  
**Chromatogram for sulfoximine: (rac)-2c**

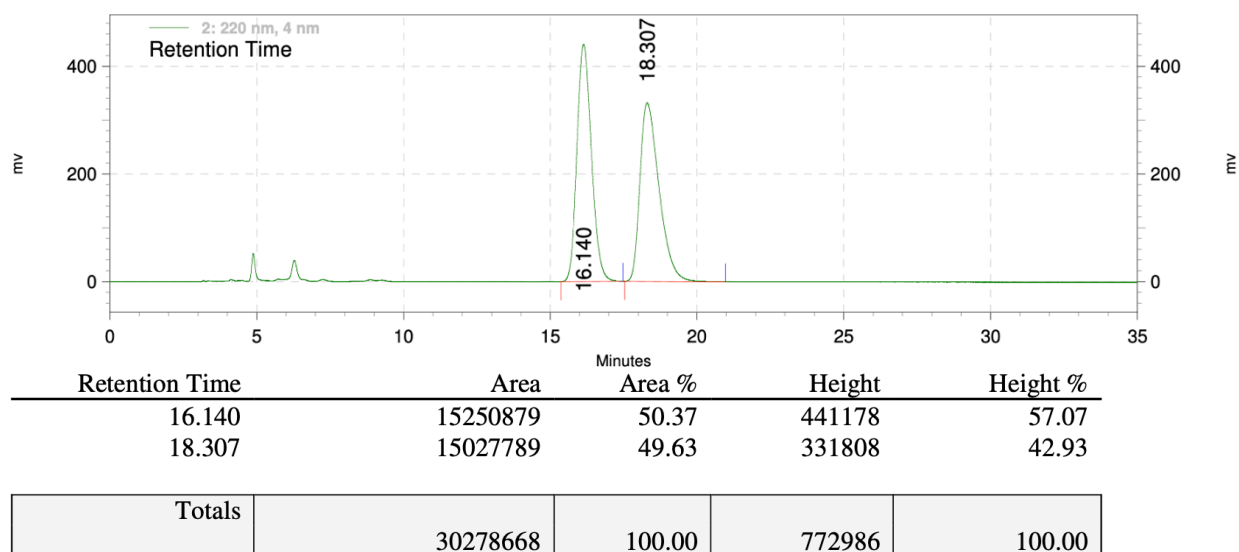

**Chromatogram for sulfoximine: (R)-2c**

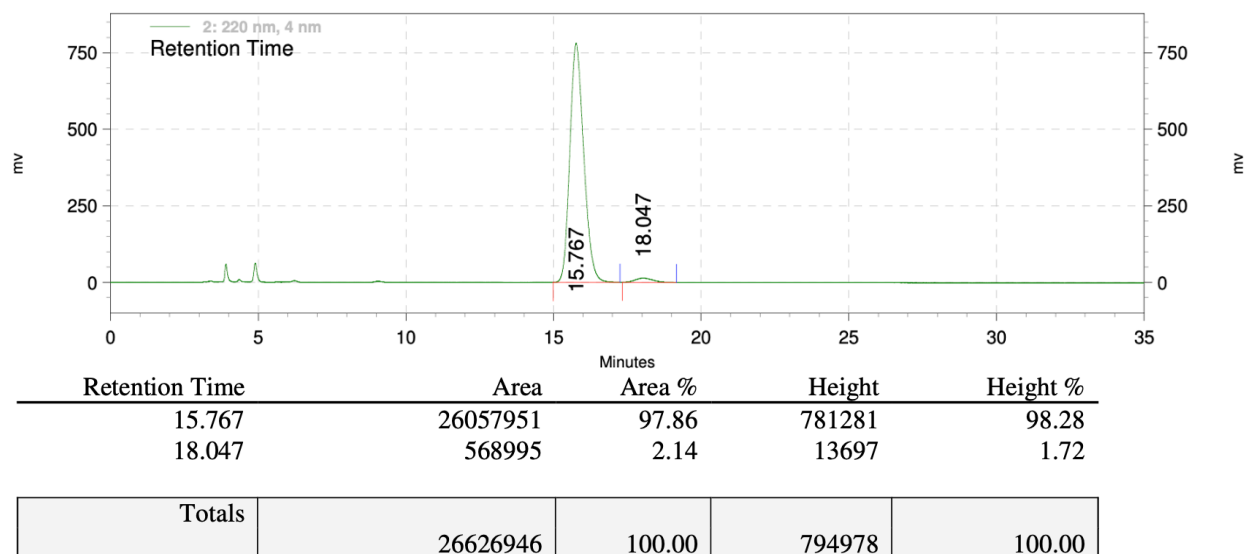

# Chromatogram for sulfoximine: (*R*)-2c after single recrystallization

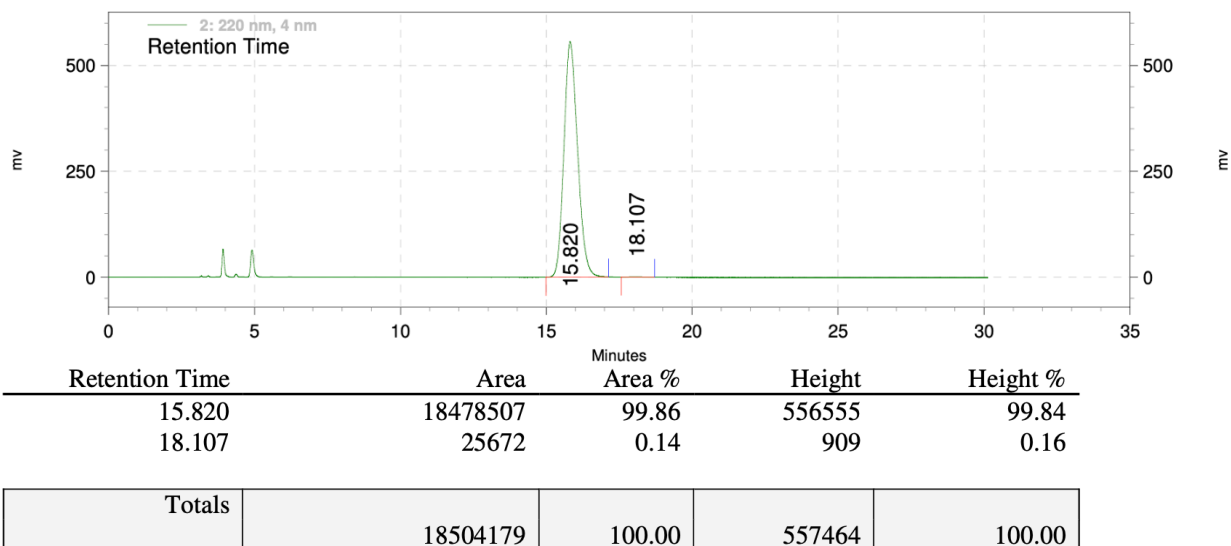

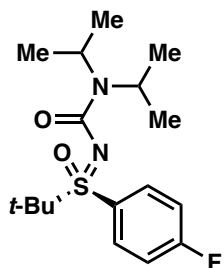

**Column:** Daicel Chiralpak IC; **Solvent:** *n*-hexane/IPA (70:30); **flowrate:** 1 mL/min  
**Chromatogram for sulfoximine: (*rac*)-2d**

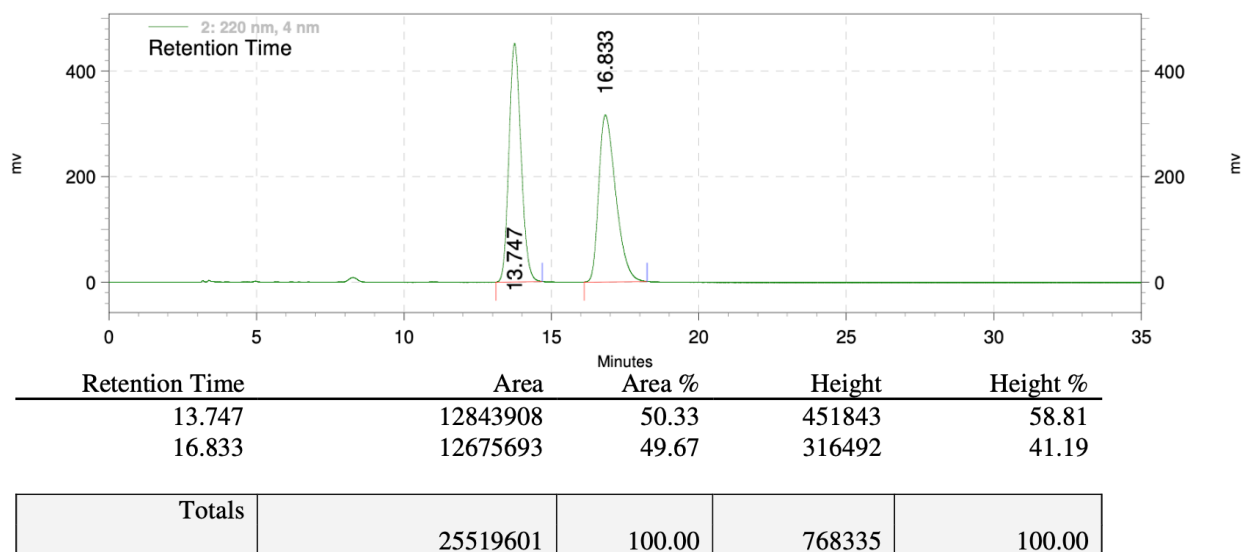

**Chromatogram for sulfoximine: (*R*)-2d**

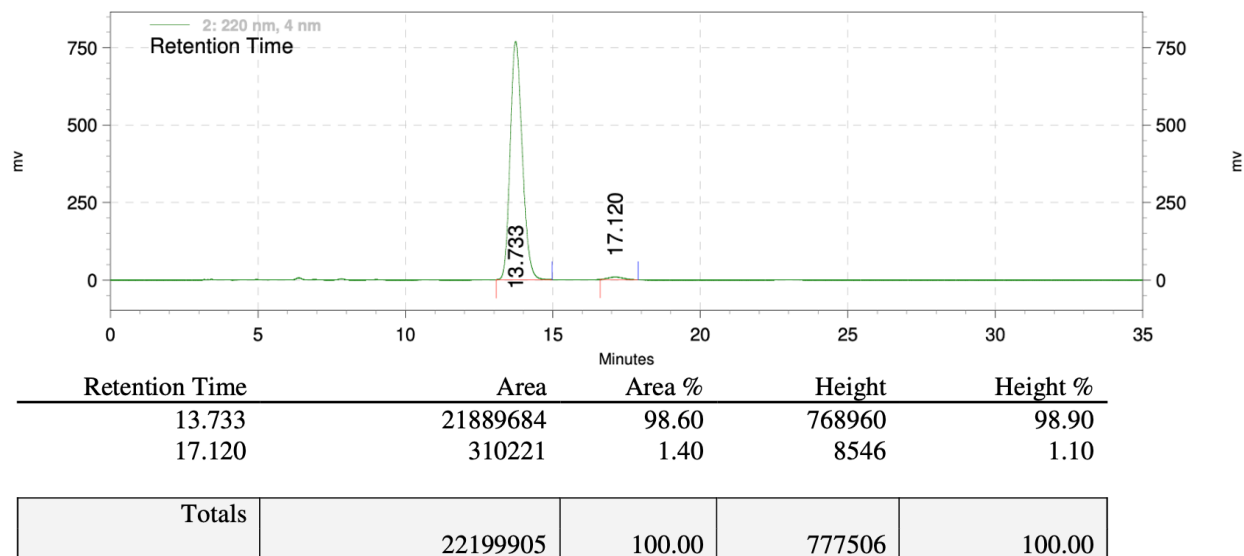

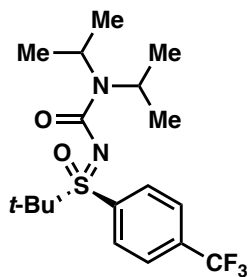

**Column:** Daicel Chiralpak IC; **Solvent:** *n*-hexane/IPA (70:30); **flowrate:** 1 mL/min  
**Chromatogram for sulfoximine: (rac)-2e**

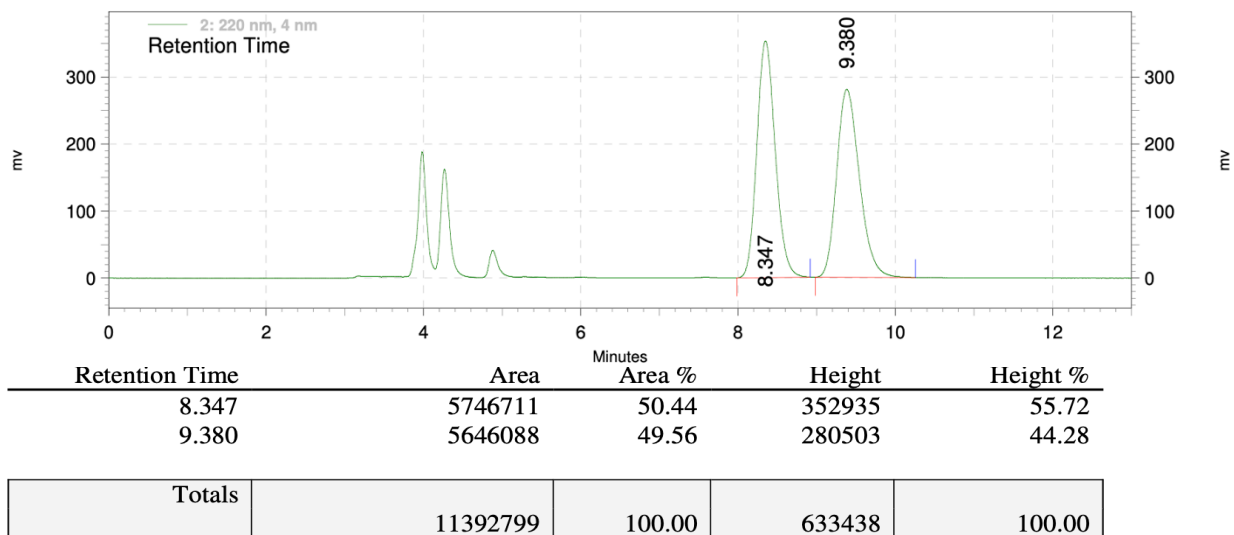

**Chromatogram for sulfoximine: (R)-2e**

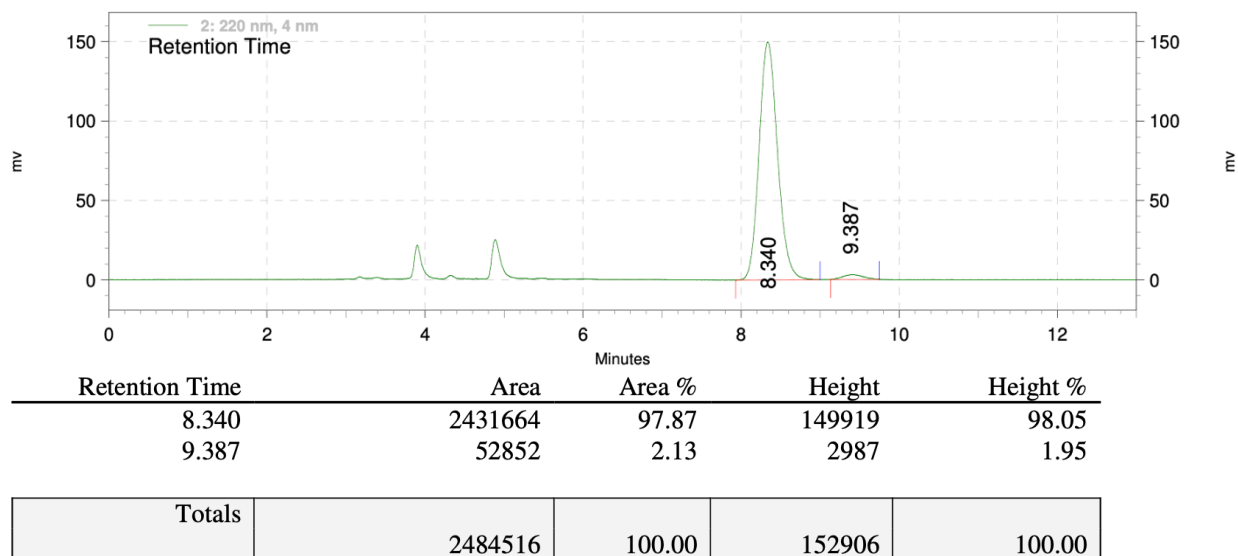

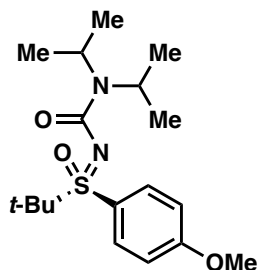

**Column:** Daicel Chiralpak IC; **Solvent:** *n*-hexane/IPA (70:30); **flowrate:** 1 mL/min  
**Chromatogram for sulfoximine: (rac)-2f**

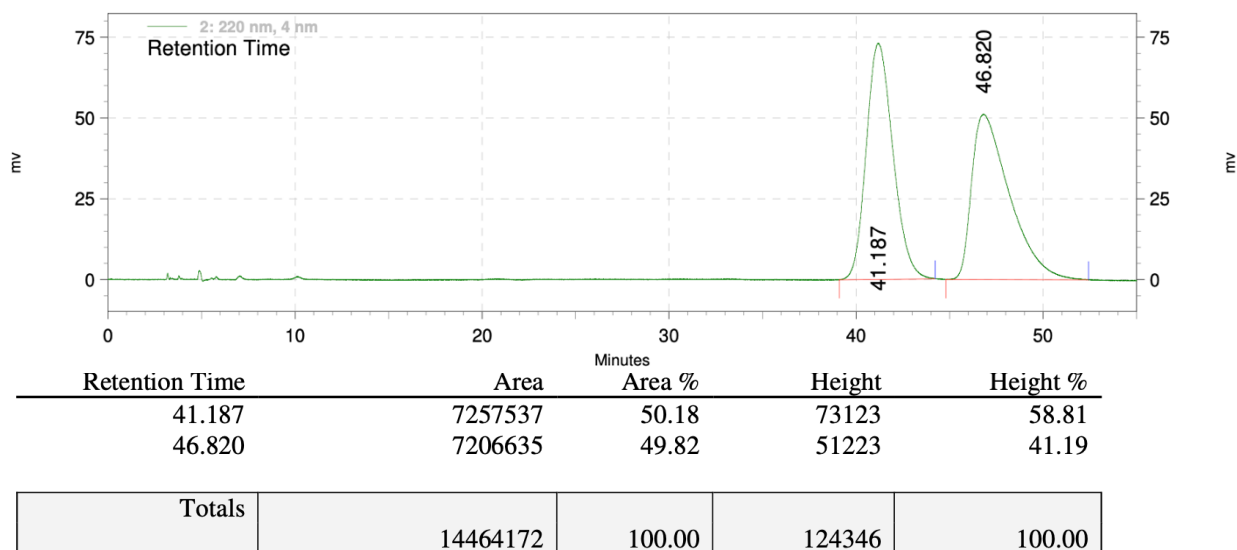

**Chromatogram for sulfoximine: (R)-2f**

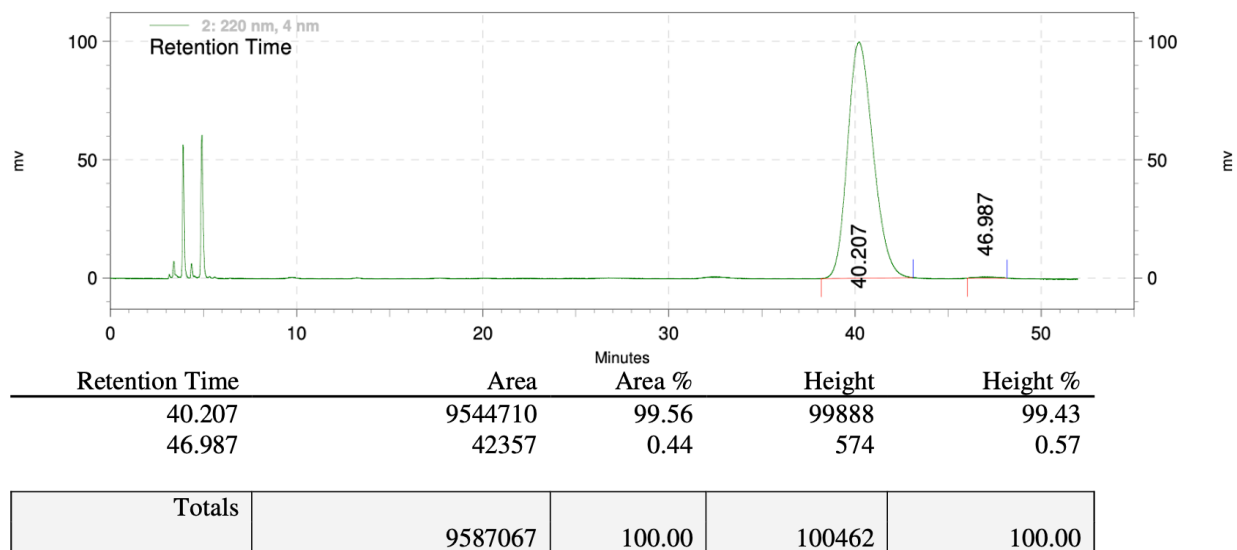

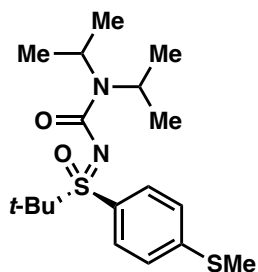

**Column:** Daicel Chiralpak IC; **Solvent:** *n*-hexane/IPA (70:30); **flowrate:** 1 mL/min  
**Chromatogram for sulfoximine: (rac)-2g**

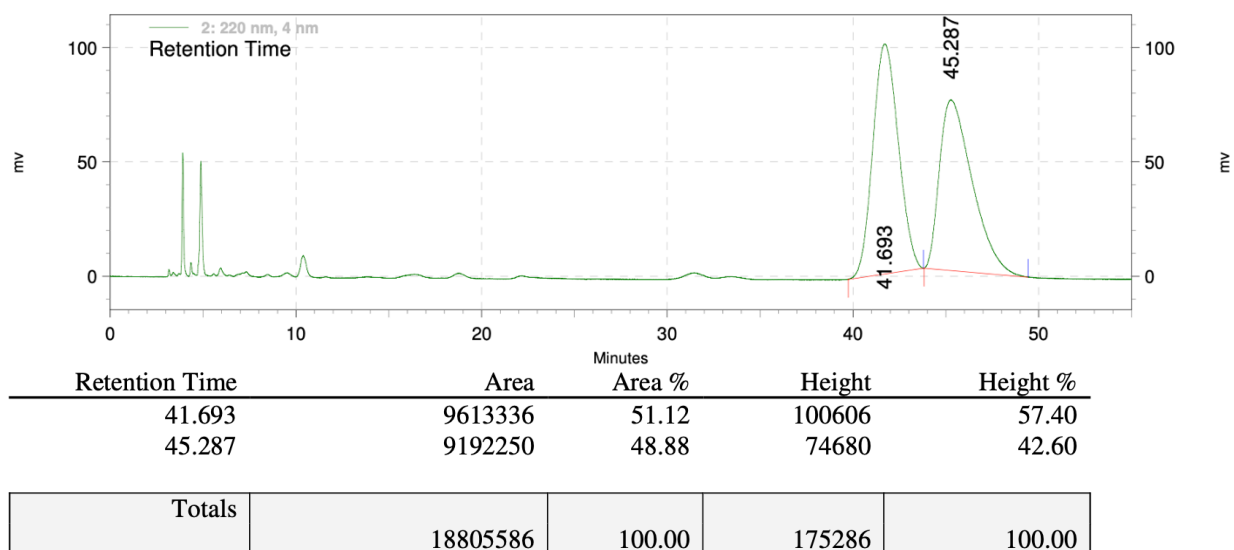

**Chromatogram for sulfoximine: (R)-2g**

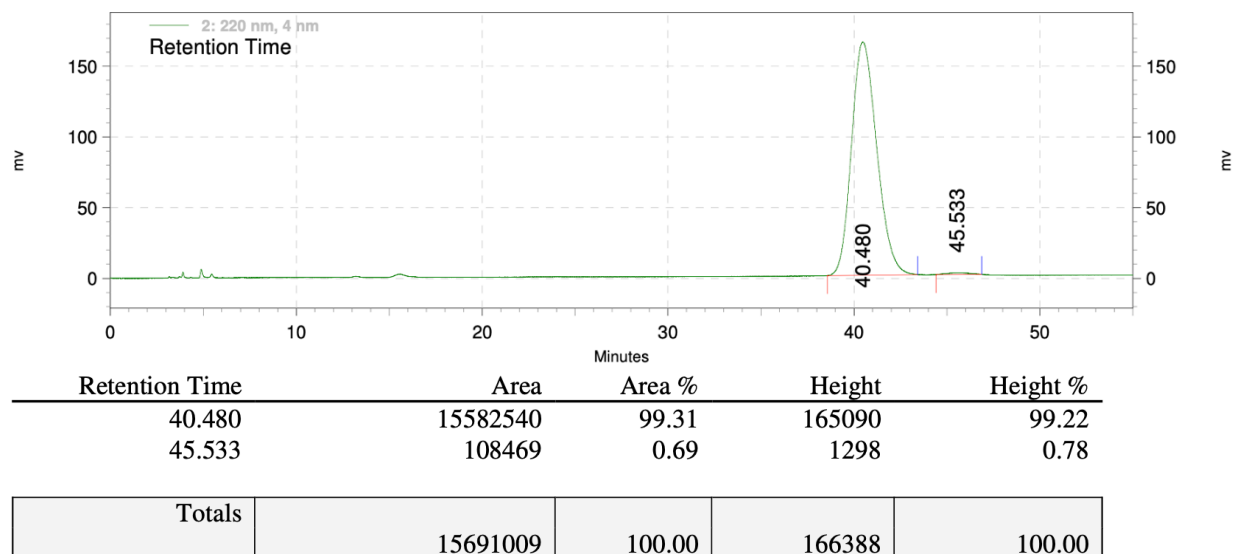

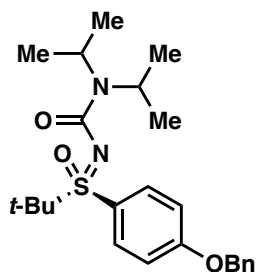

**Column:** Daicel Chiralpak IC; **Solvent:** *n*-hexane/IPA (70:30); **flowrate:** 1 mL/min  
**Chromatogram for sulfoximine: (rac)-2h**

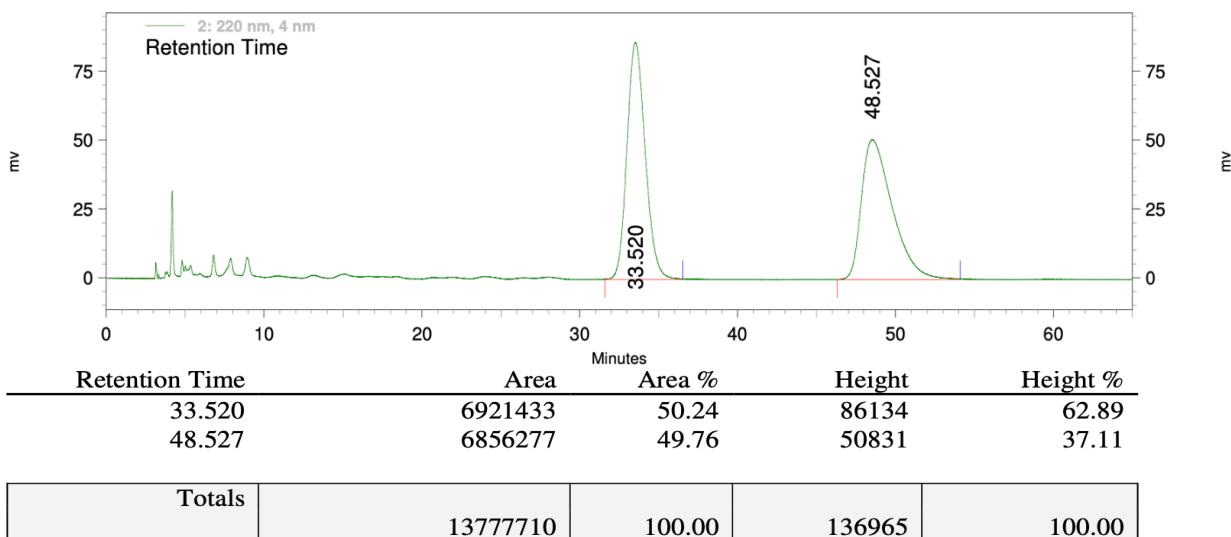

**Chromatogram for sulfoximine: (R)-2h**

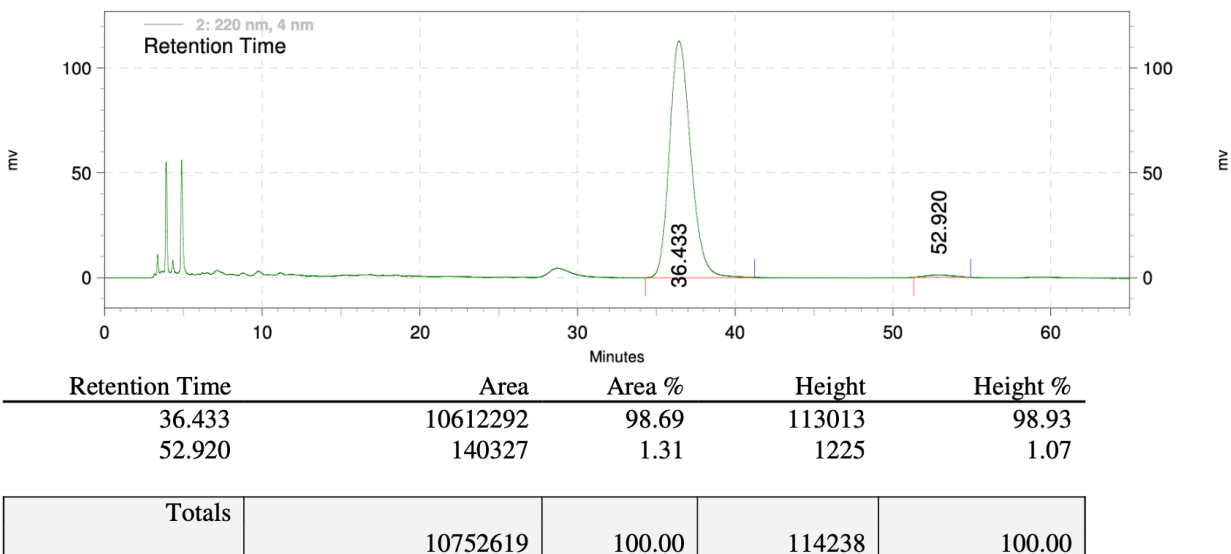

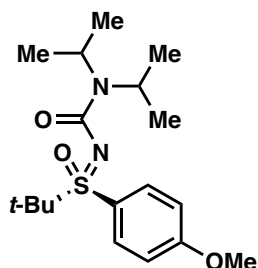

**Column:** Daicel Chiralpak IC; **Solvent:** *n*-hexane/IPA (70:30); **flowrate:** 1 mL/min  
**Chromatogram for sulfoximine: (*rac*)-2f (from (*rac*)-2i, methylated for HPLC analysis)**

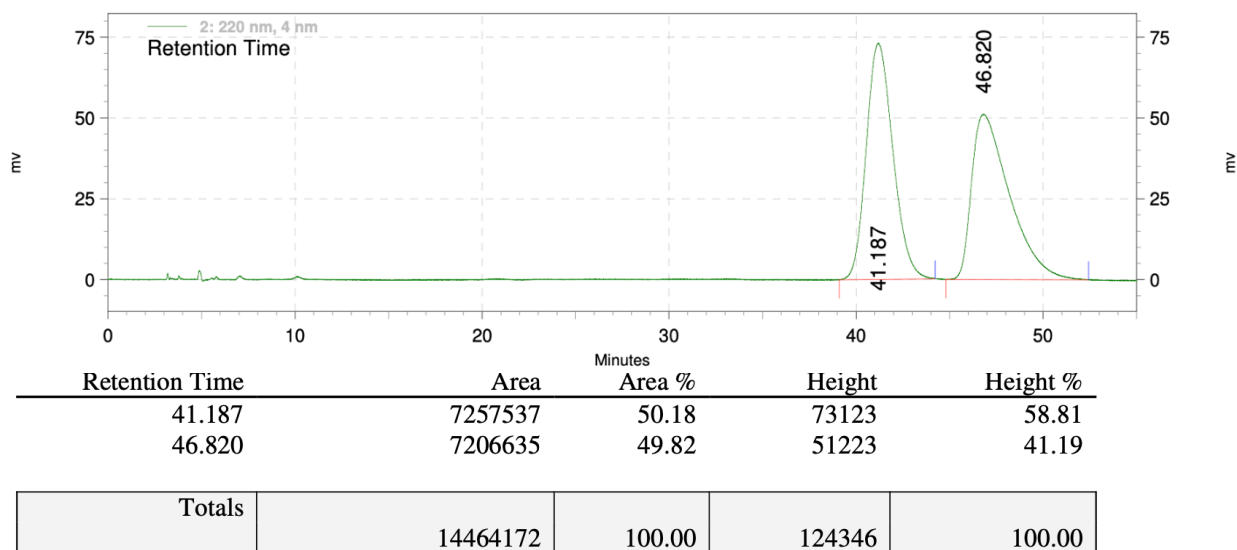

**Chromatogram for sulfoximine: (*R*)-2f (from 4-OH, methylated for HPLC analysis)**

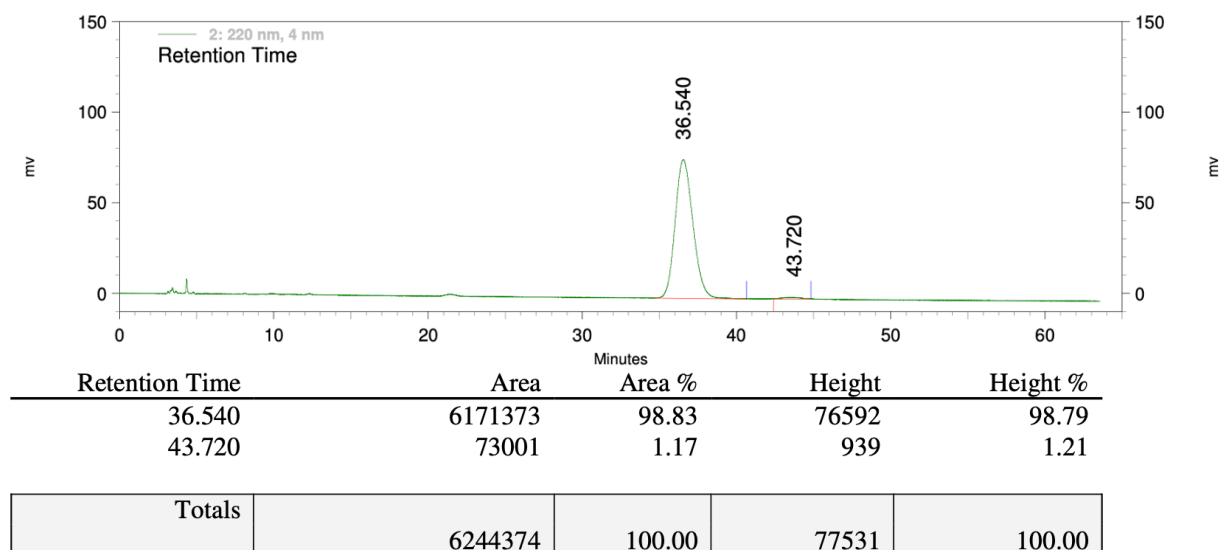

**Chromatogram for sulfoximine: (*R*)-2f (from 4-OTBS, methylated for HPLC analysis)**

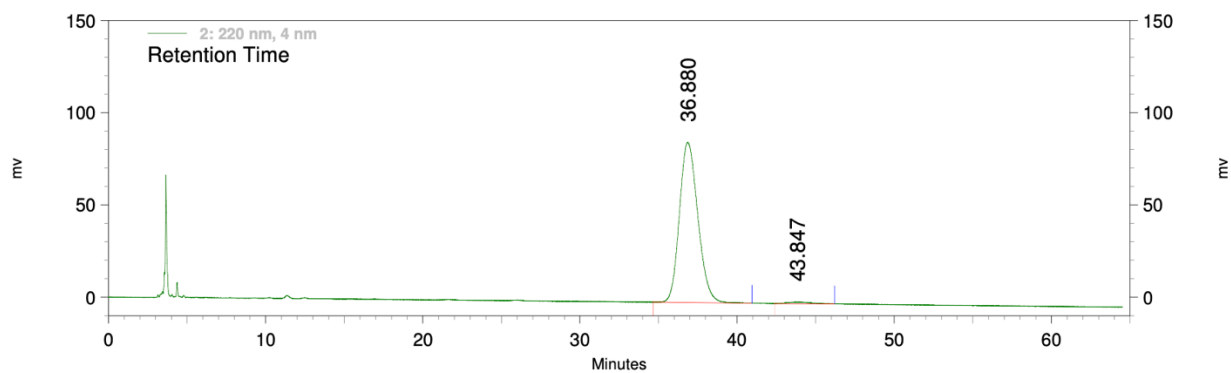

| Retention Time | Area    | Area % | Height | Height % |
|----------------|---------|--------|--------|----------|
| 36.880         | 7089708 | 98.58  | 86901  | 98.90    |
| 43.847         | 102240  | 1.42   | 965    | 1.10     |

|        |         |        |       |        |
|--------|---------|--------|-------|--------|
| Totals | 7191948 | 100.00 | 87866 | 100.00 |
|--------|---------|--------|-------|--------|

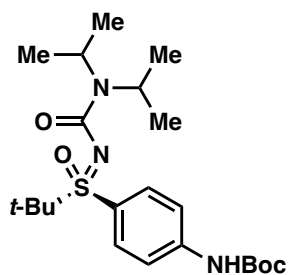

**Column:** Daicel Chiralpak IC; **Solvent:** *n*-hexane/IPA (70:30); **flowrate:** 1 mL/min  
**Chromatogram for sulfoximine: (rac)-2j**

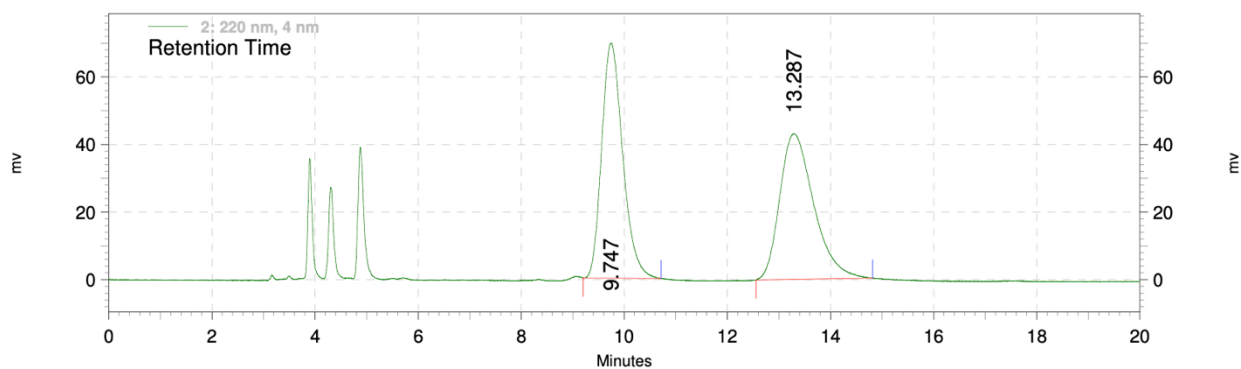

| Retention Time | Area    | Area % | Height | Height % |
|----------------|---------|--------|--------|----------|
| 9.747          | 1975254 | 50.03  | 69573  | 61.75    |
| 13.287         | 1973186 | 49.97  | 43098  | 38.25    |

|        |         |        |        |        |
|--------|---------|--------|--------|--------|
| Totals | 3948440 | 100.00 | 112671 | 100.00 |
|--------|---------|--------|--------|--------|

**Chromatogram for sulfoximine: (R)-2j**

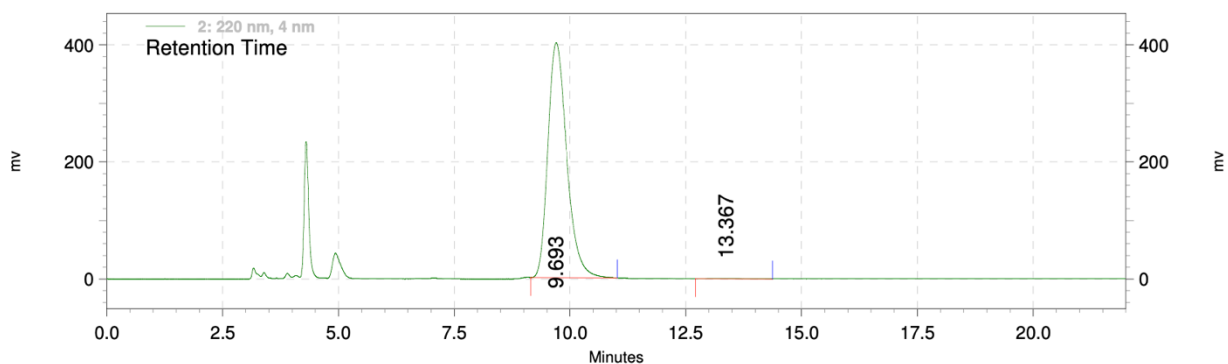

| Retention Time | Area     | Area % | Height | Height % |
|----------------|----------|--------|--------|----------|
| 9.693          | 11450597 | 99.69  | 401092 | 99.80    |
| 13.367         | 35935    | 0.31   | 809    | 0.20     |

|        |          |        |        |        |
|--------|----------|--------|--------|--------|
| Totals | 11486532 | 100.00 | 401901 | 100.00 |
|--------|----------|--------|--------|--------|

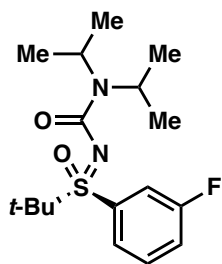

**Column:** Daicel Chiralpak IC; **Solvent:** *n*-hexane/IPA (70:30); **flowrate:** 1 mL/min  
**Chromatogram for sulfoximine: (rac)-2k**

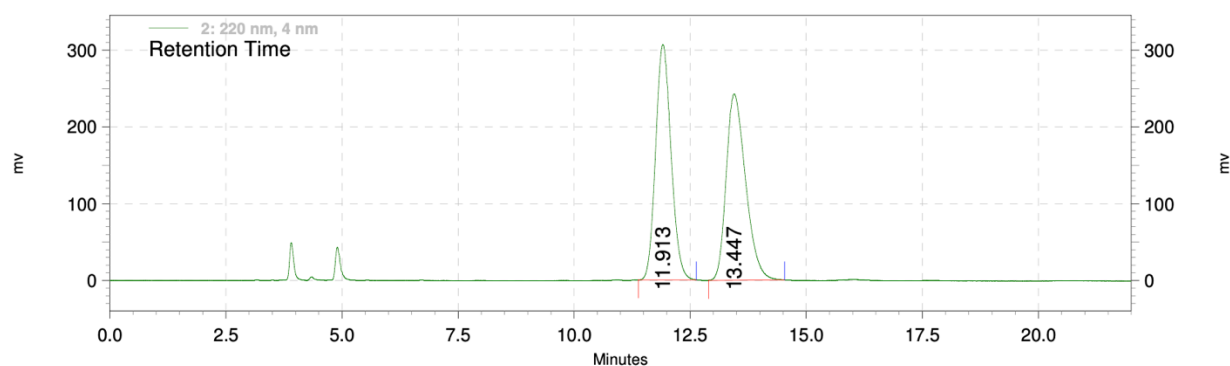

| Retention Time | Area    | Area % | Height | Height % |
|----------------|---------|--------|--------|----------|
| 11.913         | 7127973 | 50.14  | 306635 | 55.82    |
| 13.447         | 7089082 | 49.86  | 242713 | 44.18    |

|        |          |        |        |        |
|--------|----------|--------|--------|--------|
| Totals | 14217055 | 100.00 | 549348 | 100.00 |
|--------|----------|--------|--------|--------|

**Chromatogram for sulfoximine: (R)-2k**

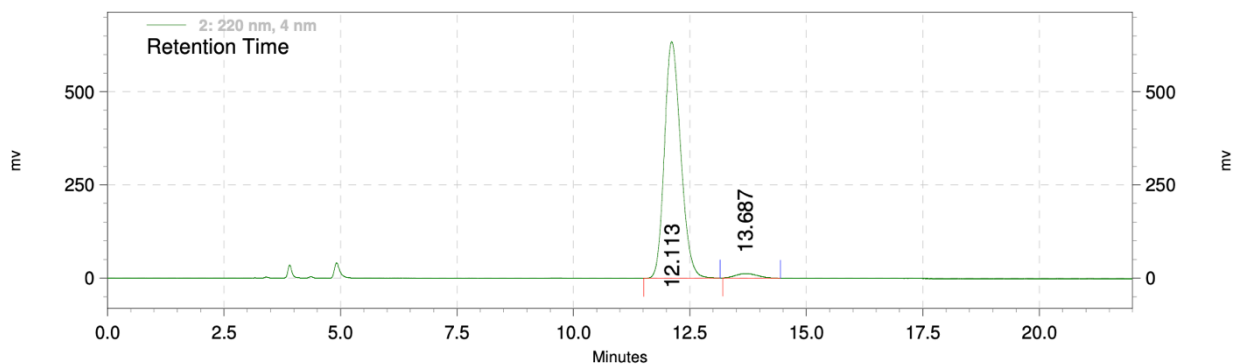

| Retention Time | Area     | Area % | Height | Height % |
|----------------|----------|--------|--------|----------|
| 12.113         | 15485948 | 97.53  | 635313 | 98.12    |
| 13.687         | 392326   | 2.47   | 12205  | 1.88     |

|        |          |        |        |        |
|--------|----------|--------|--------|--------|
| Totals | 15878274 | 100.00 | 647518 | 100.00 |
|--------|----------|--------|--------|--------|

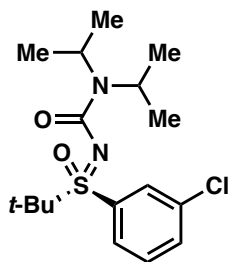

**Column:** Daicel Chiralpak IC; **Solvent:** *n*-hexane/IPA (70:30); **flowrate:** 1 mL/min  
**Chromatogram for sulfoximine: (*rac*)-2l**

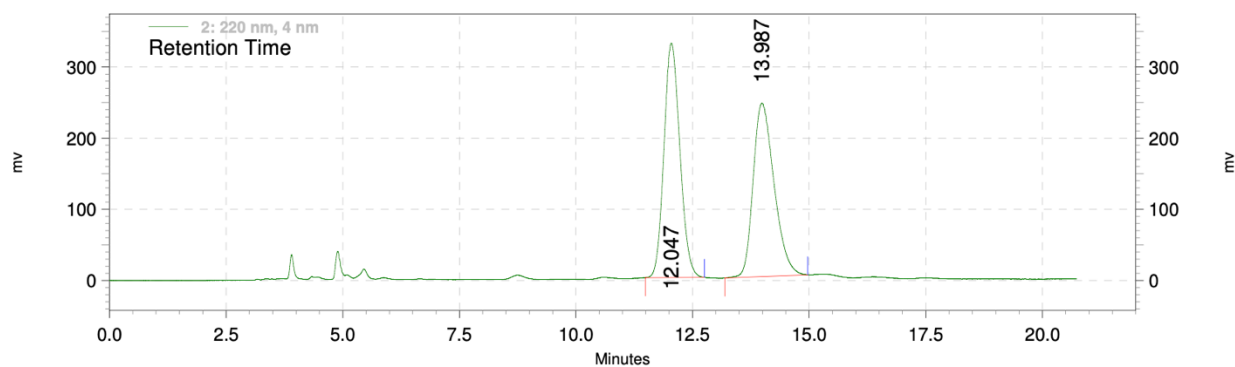

| Retention Time | Area    | Area % | Height | Height % |
|----------------|---------|--------|--------|----------|
| 12.047         | 7873110 | 50.85  | 329382 | 57.48    |
| 13.987         | 7609700 | 49.15  | 243619 | 42.52    |

|        |          |        |        |        |
|--------|----------|--------|--------|--------|
| Totals | 15482810 | 100.00 | 573001 | 100.00 |
|--------|----------|--------|--------|--------|

**Chromatogram for sulfoximine: (*R*)-2l**

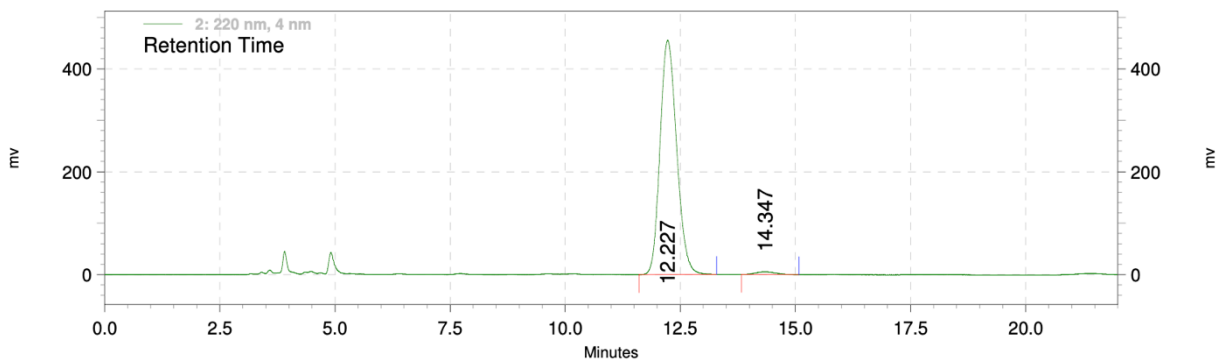

| Retention Time | Area     | Area % | Height | Height % |
|----------------|----------|--------|--------|----------|
| 12.227         | 11366202 | 98.61  | 455096 | 98.87    |
| 14.347         | 160625   | 1.39   | 5202   | 1.13     |

|        |          |        |        |        |
|--------|----------|--------|--------|--------|
| Totals | 11526827 | 100.00 | 460298 | 100.00 |
|--------|----------|--------|--------|--------|

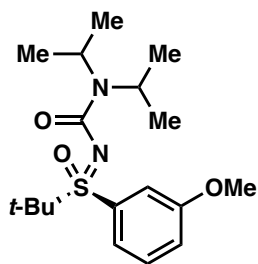

**Column:** Daicel Chiralpak IC; **Solvent:** *n*-hexane/IPA (70:30); **flowrate:** 1 mL/min  
**Chromatogram for sulfoximine: (*rac*)-2m**

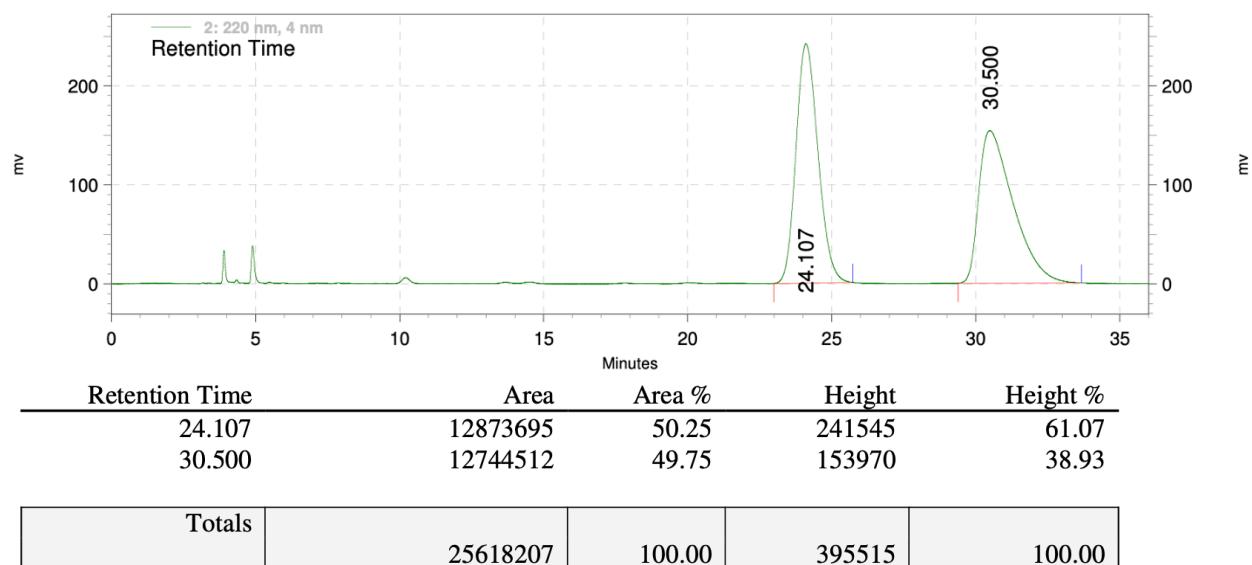

**Chromatogram for sulfoximine: (*R*)-2m**

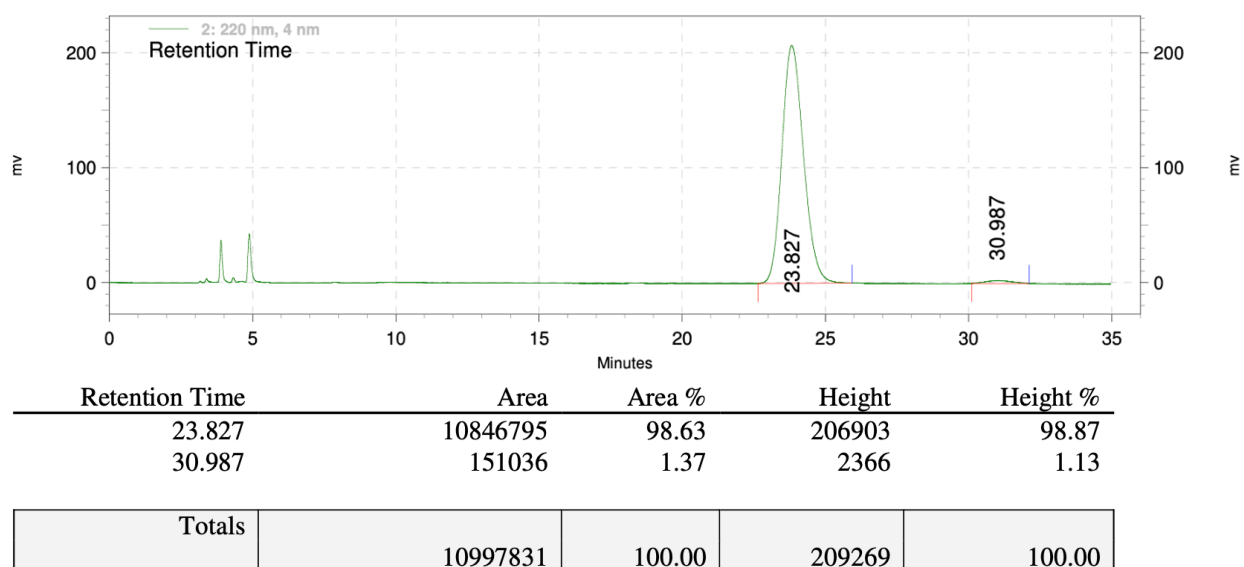

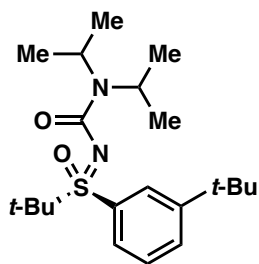

**Column:** Daicel Chiralpak IC; **Solvent:** *n*-hexane/IPA (70:30); **flowrate:** 1 mL/min  
**Chromatogram for sulfoximine: (*rac*)-2n**

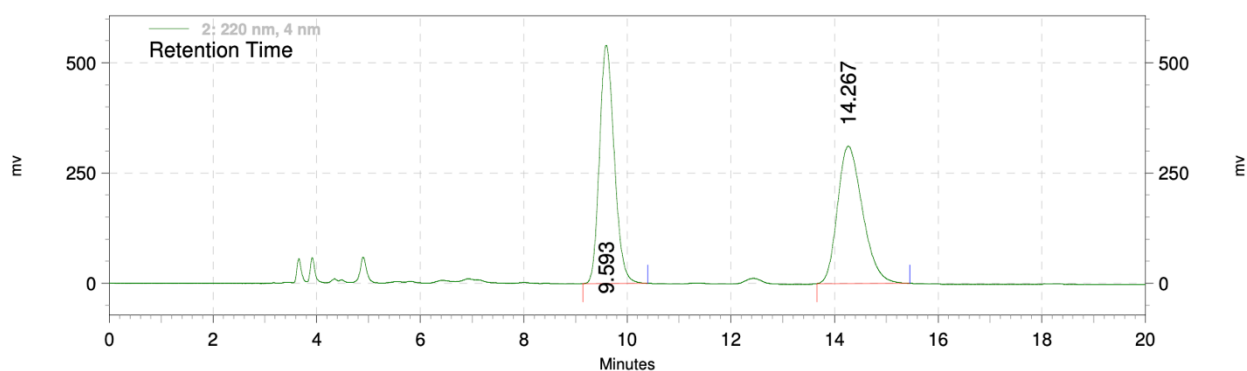

| Retention Time | Area     | Area % | Height | Height % |
|----------------|----------|--------|--------|----------|
| 9.593          | 10729675 | 50.60  | 540421 | 63.42    |
| 14.267         | 10476809 | 49.40  | 311706 | 36.58    |

|        |          |        |        |        |
|--------|----------|--------|--------|--------|
| Totals | 21206484 | 100.00 | 852127 | 100.00 |
|--------|----------|--------|--------|--------|

**Chromatogram for sulfoximine: (*R*)-2n**

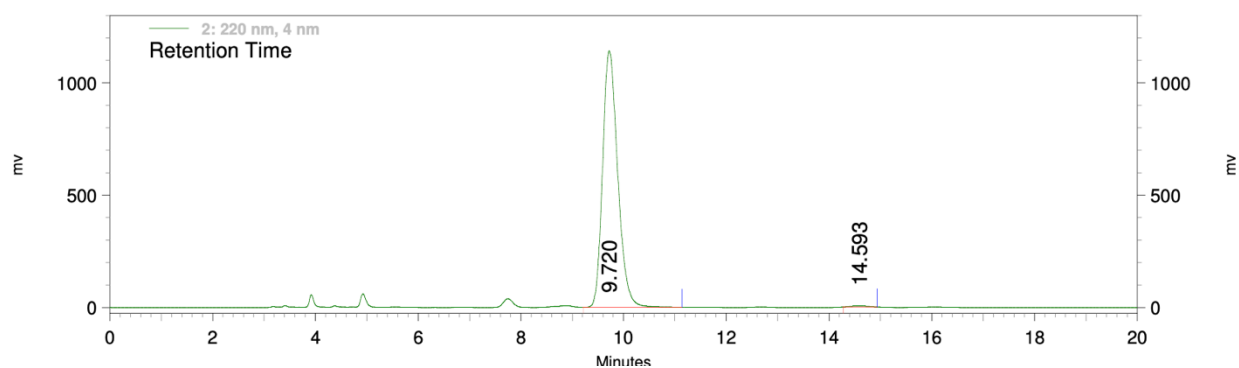

| Retention Time | Area     | Area % | Height  | Height % |
|----------------|----------|--------|---------|----------|
| 9.720          | 23355532 | 99.53  | 1141430 | 99.59    |
| 14.593         | 109182   | 0.47   | 4666    | 0.41     |

|        |          |        |         |        |
|--------|----------|--------|---------|--------|
| Totals | 23464714 | 100.00 | 1146096 | 100.00 |
|--------|----------|--------|---------|--------|

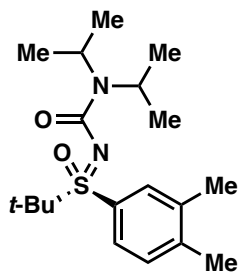

**Column:** Daicel Chiralpak IC; **Solvent:** *n*-hexane/IPA (70:30); **flowrate:** 1 mL/min  
**Chromatogram for sulfoximine: (rac)-2o**

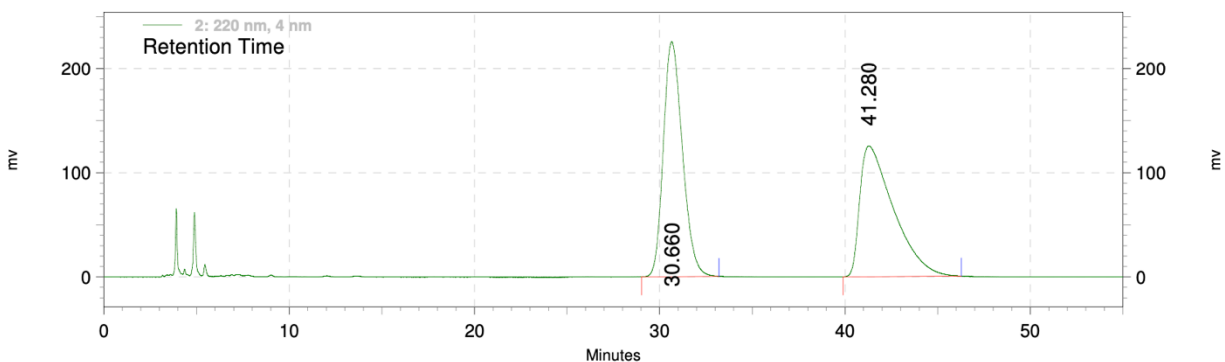

| Retention Time | Area     | Area % | Height | Height % |
|----------------|----------|--------|--------|----------|
| 30.660         | 16161082 | 50.41  | 225802 | 64.26    |
| 41.280         | 15895738 | 49.59  | 125596 | 35.74    |

|        |          |        |        |        |
|--------|----------|--------|--------|--------|
| Totals | 32056820 | 100.00 | 351398 | 100.00 |
|--------|----------|--------|--------|--------|

**Chromatogram for sulfoximine: (R)-2o**

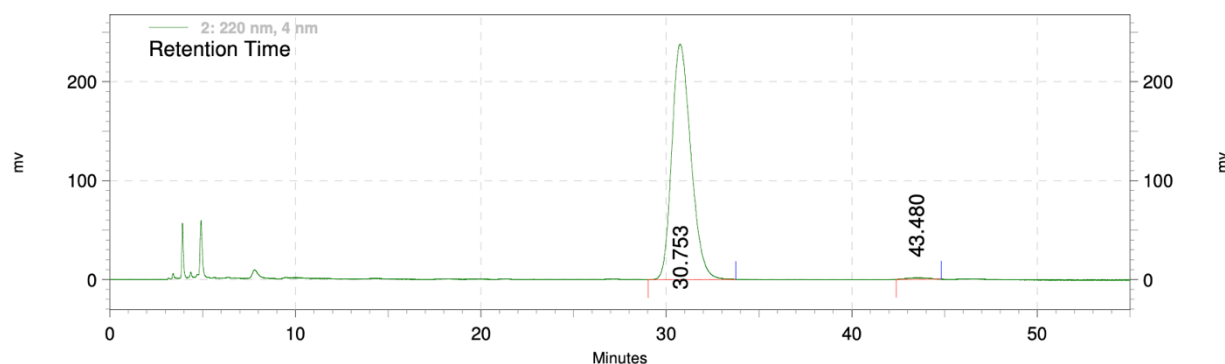

| Retention Time | Area     | Area % | Height | Height % |
|----------------|----------|--------|--------|----------|
| 30.753         | 17015644 | 99.29  | 238565 | 99.36    |
| 43.480         | 121523   | 0.71   | 1527   | 0.64     |

|        |          |        |        |        |
|--------|----------|--------|--------|--------|
| Totals | 17137167 | 100.00 | 240092 | 100.00 |
|--------|----------|--------|--------|--------|

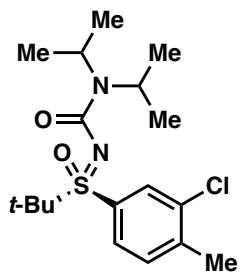

**Column:** Daicel Chiralpak IC; **Solvent:** *n*-hexane/IPA (70:30); **flowrate:** 1 mL/min  
**Chromatogram for sulfoximine: (rac)-2p**

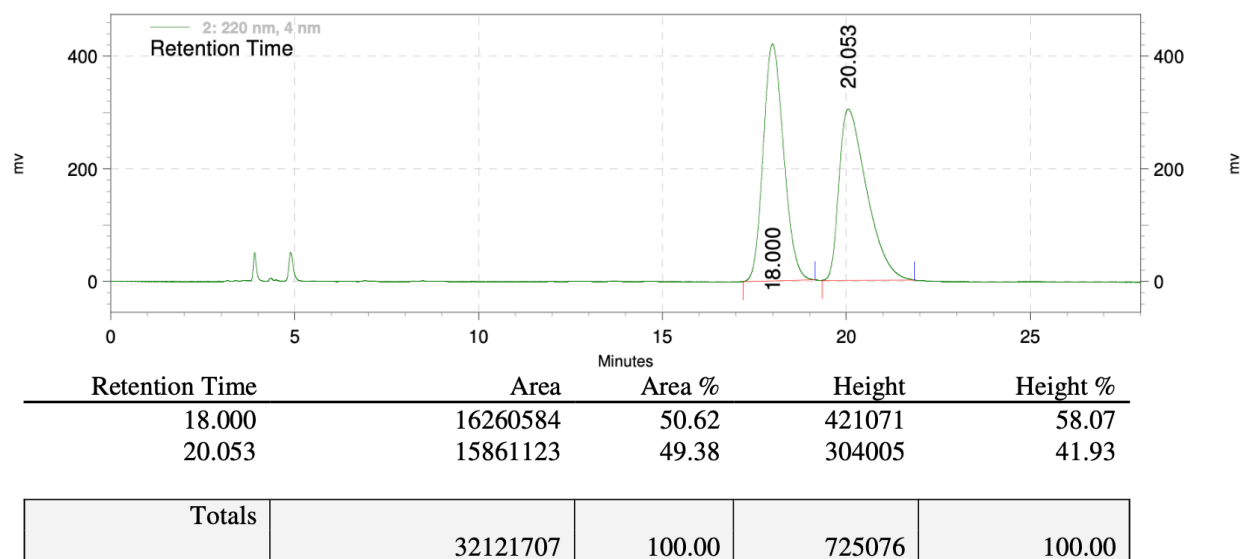

**Chromatogram for sulfoximine: (R)-2p**

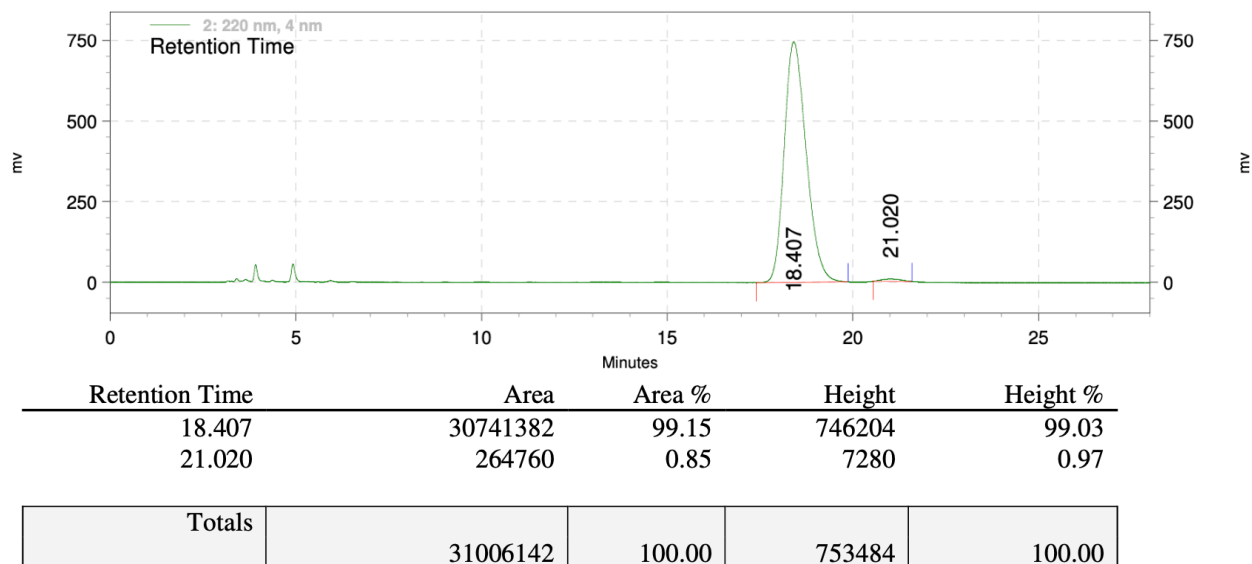

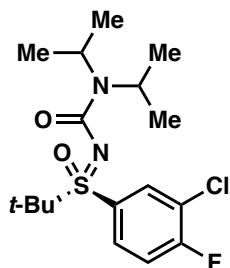

**Column:** Daicel Chiralpak IA; **Solvent:** *n*-hexane/IPA (95:05); **flowrate:** 1 mL/min  
**Chromatogram for sulfoximine: (rac)-2q**

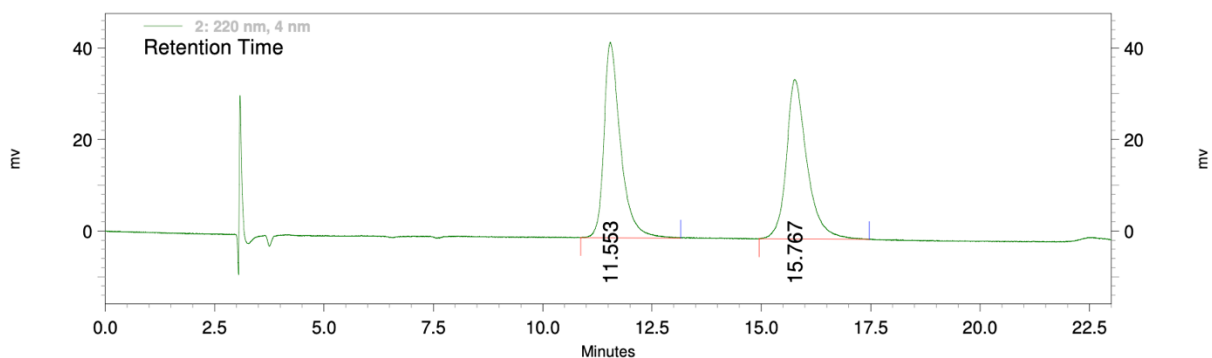

| Retention Time | Area    | Area % | Height | Height % |
|----------------|---------|--------|--------|----------|
| 11.553         | 1127966 | 49.63  | 42757  | 55.07    |
| 15.767         | 1144810 | 50.37  | 34884  | 44.93    |
| Totals         | 2272776 | 100.00 | 77641  | 100.00   |

**Chromatogram for sulfoximine: (R)-2q**

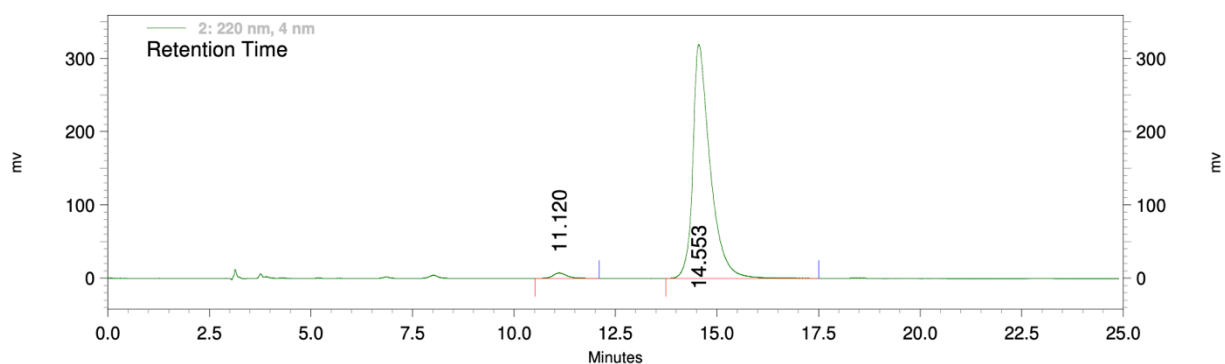

| Retention Time | Area    | Area % | Height | Height % |
|----------------|---------|--------|--------|----------|
| 11.120         | 187862  | 1.94   | 7530   | 2.30     |
| 14.553         | 9485452 | 98.06  | 319510 | 97.70    |
| Totals         | 9673314 | 100.00 | 327040 | 100.00   |

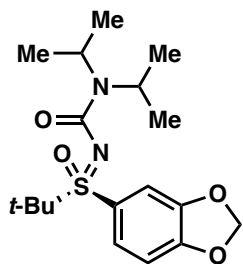

**Column:** Daicel Chiralpak IB; **Solvent:** *n*-hexane/IPA (95:05); **flowrate:** 1 mL/min  
**Chromatogram for sulfoximine: (rac)-2r**

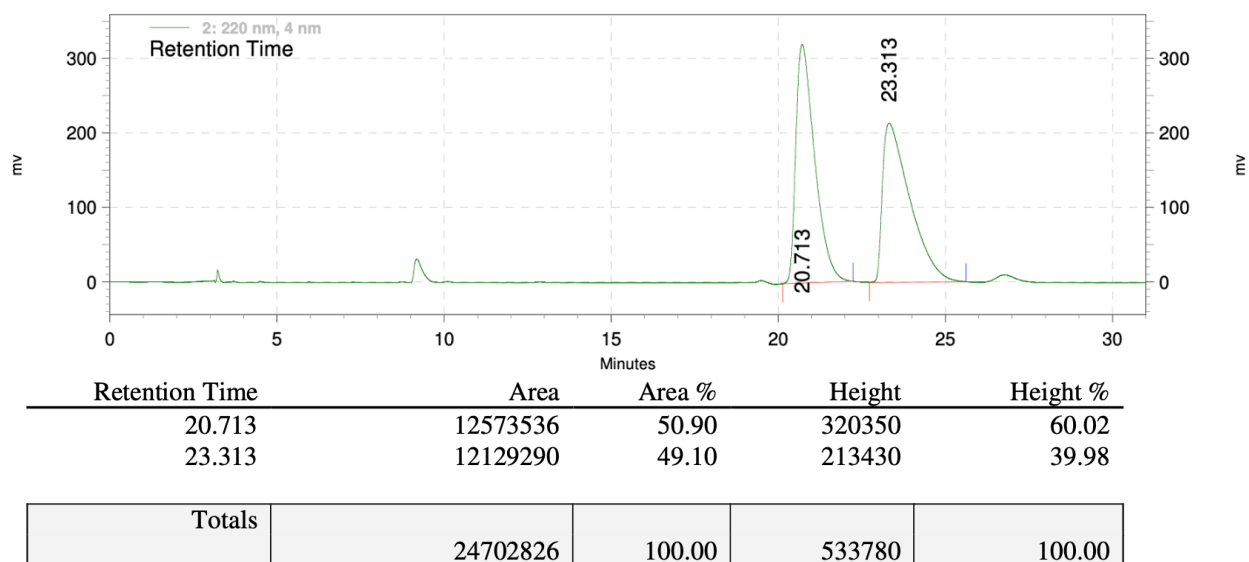

**Chromatogram for sulfoximine: (R)-2r**

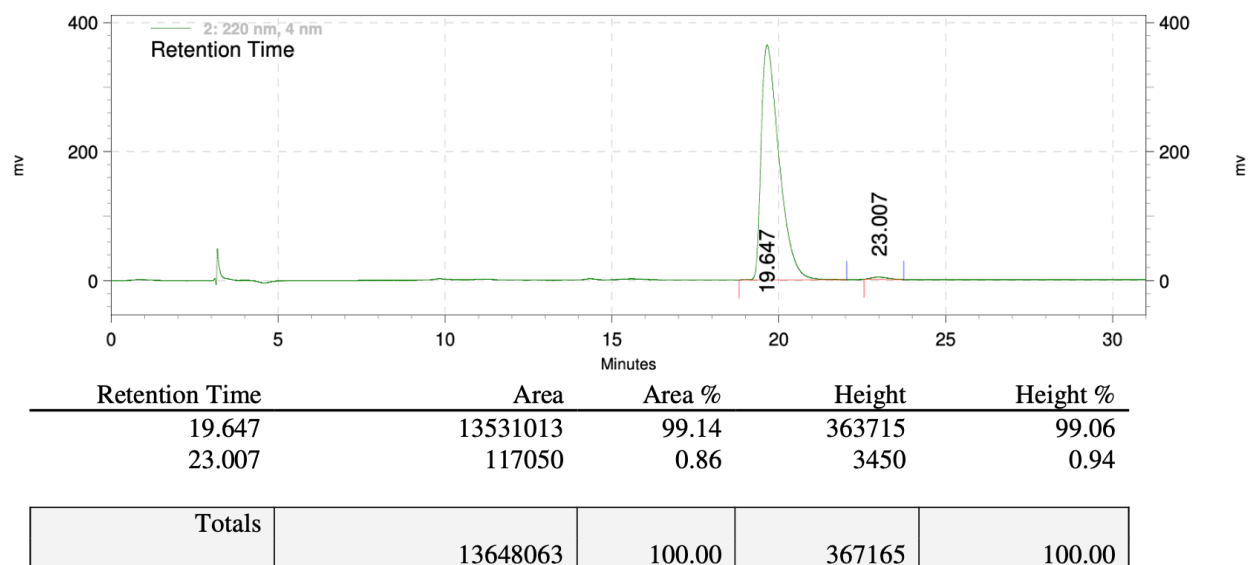

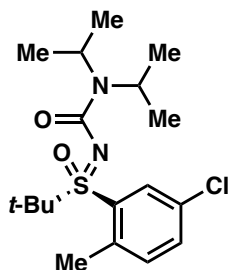

**Column:** Daicel Chiralpak IC; **Solvent:** *n*-hexane/IPA (70:30); **flowrate:** 1 mL/min  
**Chromatogram for sulfoximine: (rac)-2s**

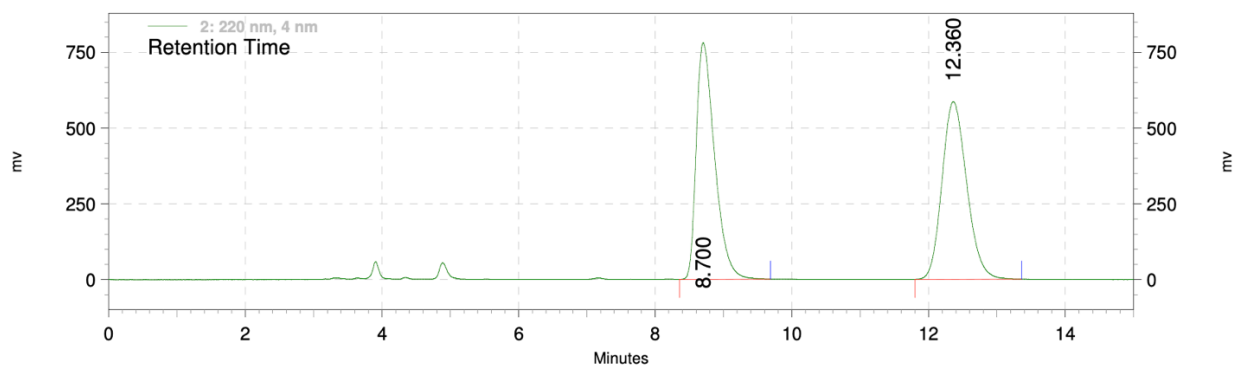

| Retention Time | Area     | Area % | Height  | Height % |
|----------------|----------|--------|---------|----------|
| 8.700          | 14592616 | 49.71  | 780940  | 57.13    |
| 12.360         | 14761527 | 50.29  | 586106  | 42.87    |
| Totals         | 29354143 | 100.00 | 1367046 | 100.00   |

**Chromatogram for sulfoximine: (R)-2s**

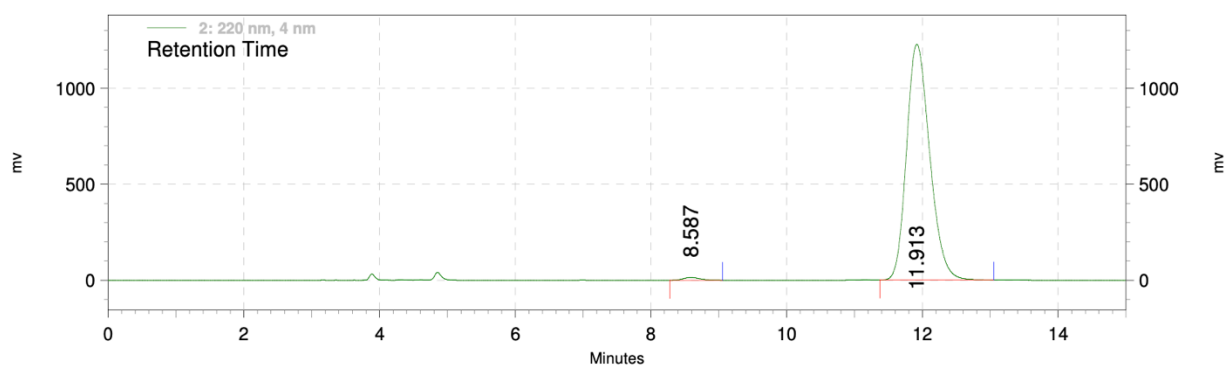

| Retention Time | Area     | Area % | Height  | Height % |
|----------------|----------|--------|---------|----------|
| 8.587          | 240682   | 0.82   | 14159   | 1.14     |
| 11.913         | 29157195 | 99.18  | 1227073 | 98.86    |
| Totals         | 29397877 | 100.00 | 1241232 | 100.00   |

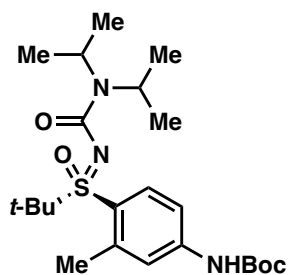

**Column:** Daicel Chiralpak IB; **Solvent:** *n*-hexane/IPA (95:05); **flowrate:** 1 mL/min  
**Chromatogram for sulfoximine: (rac)-2t**

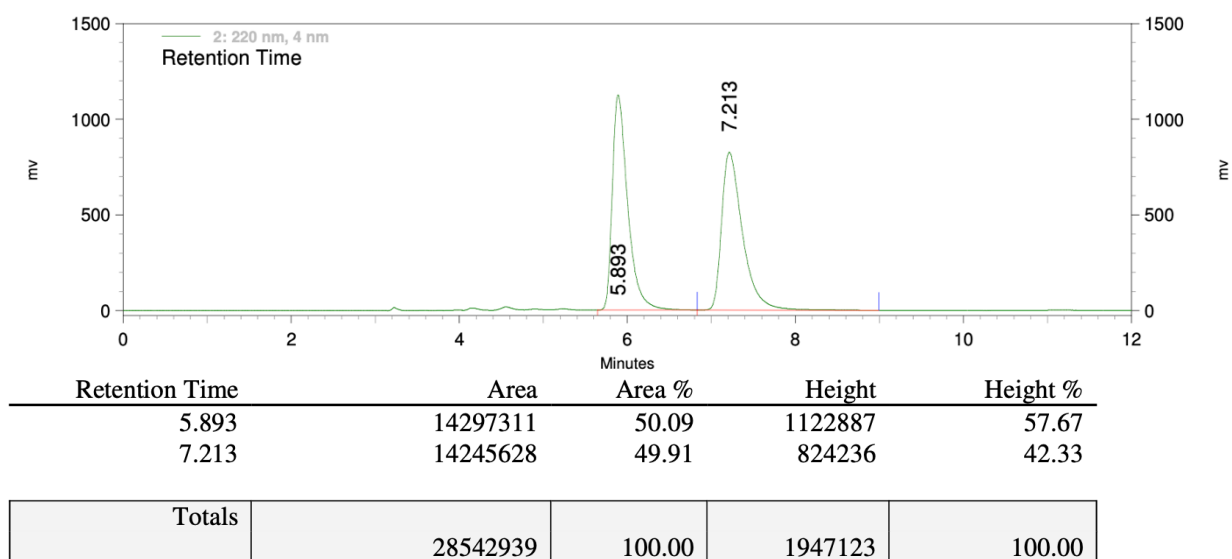

**Chromatogram for sulfoximine: (R)-2t**

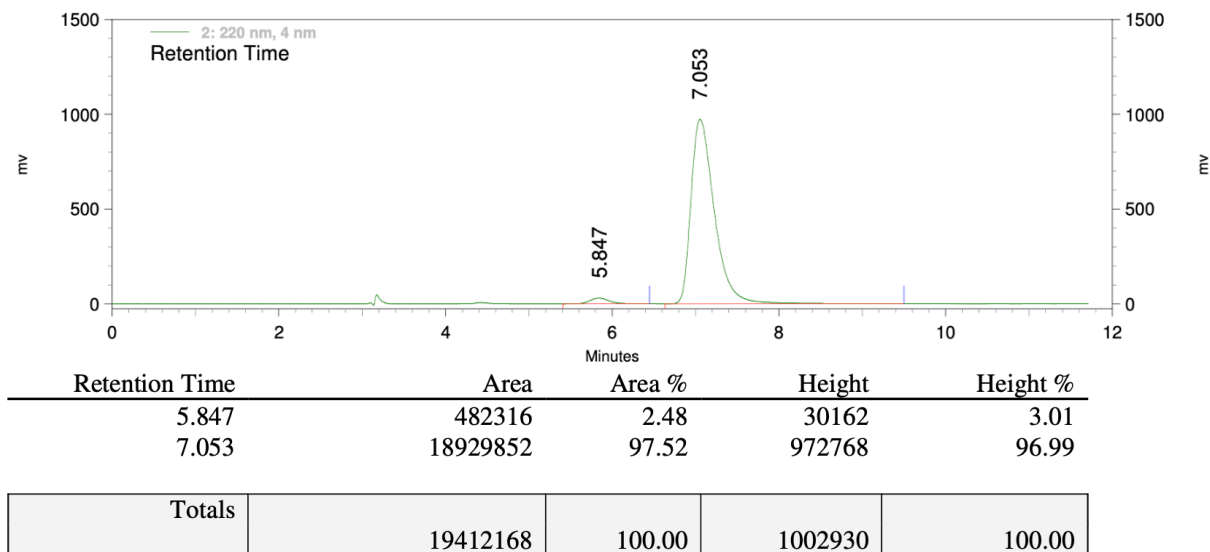

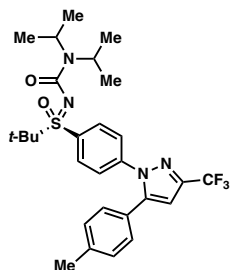

**Column:** Daicel Chiralpak IC; **Solvent:** *n*-hexane/IPA (70:30); **flowrate:** 1 mL/min  
**Chromatogram for sulfoximine: (*rac*)-2u**

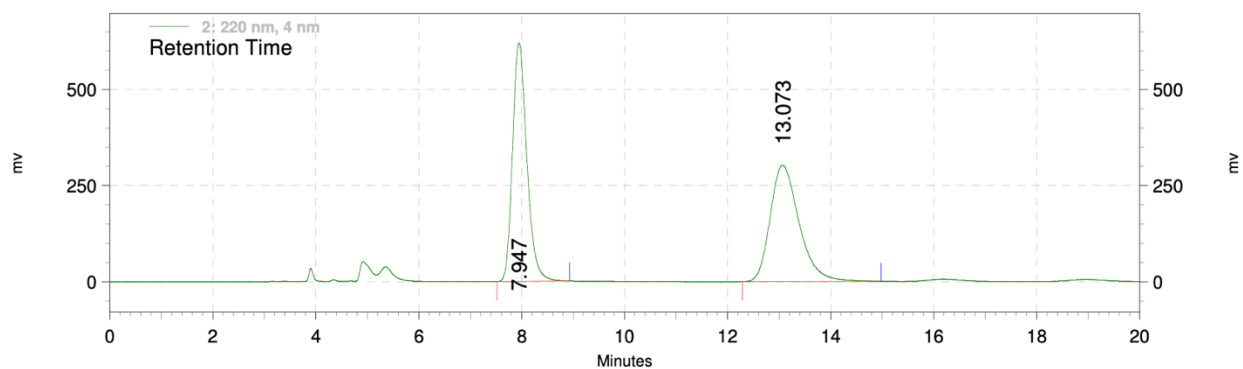

| Retention Time | Area     | Area % | Height | Height % |
|----------------|----------|--------|--------|----------|
| 7.947          | 11960150 | 50.35  | 619813 | 67.20    |
| 13.073         | 11792391 | 49.65  | 302577 | 32.80    |

|        |          |        |        |        |
|--------|----------|--------|--------|--------|
| Totals | 23752541 | 100.00 | 922390 | 100.00 |
|--------|----------|--------|--------|--------|

**Chromatogram for sulfoximine: (*R*)-2u**

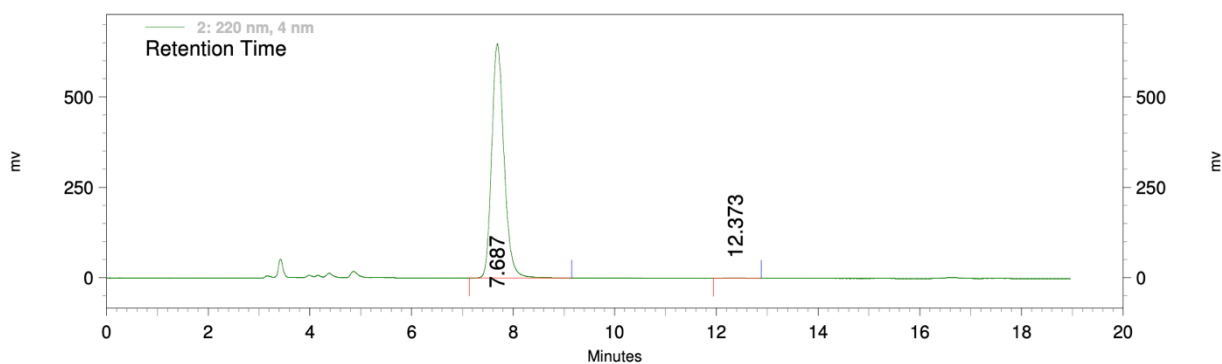

| Retention Time | Area     | Area % | Height | Height % |
|----------------|----------|--------|--------|----------|
| 7.687          | 10930868 | 99.76  | 648328 | 99.86    |
| 12.373         | 26162    | 0.24   | 901    | 0.14     |

|        |          |        |        |        |
|--------|----------|--------|--------|--------|
| Totals | 10957030 | 100.00 | 649229 | 100.00 |
|--------|----------|--------|--------|--------|

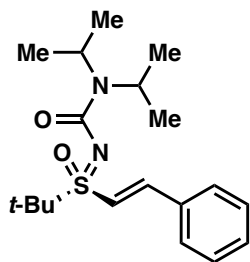

**Column:** Daicel Chiralpak IC; **Solvent:** *n*-hexane/IPA (70:30); **flowrate:** 1 mL/min  
**Chromatogram for sulfoximine: (*rac*, *E*)-2w**

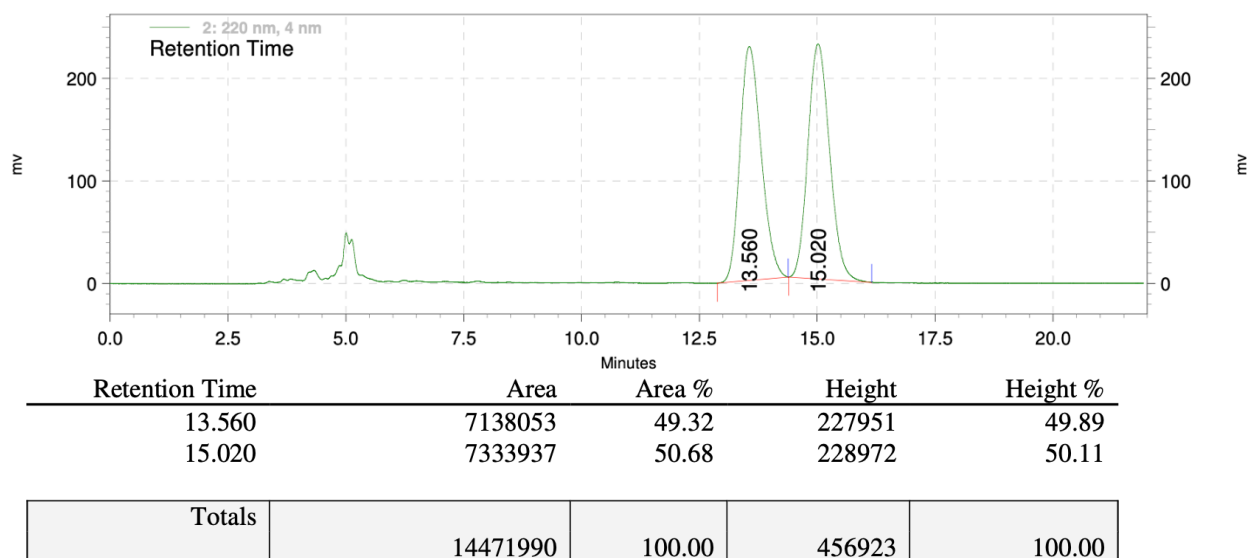

**Chromatogram for sulfoximine: (*S*, *E*)-2w**

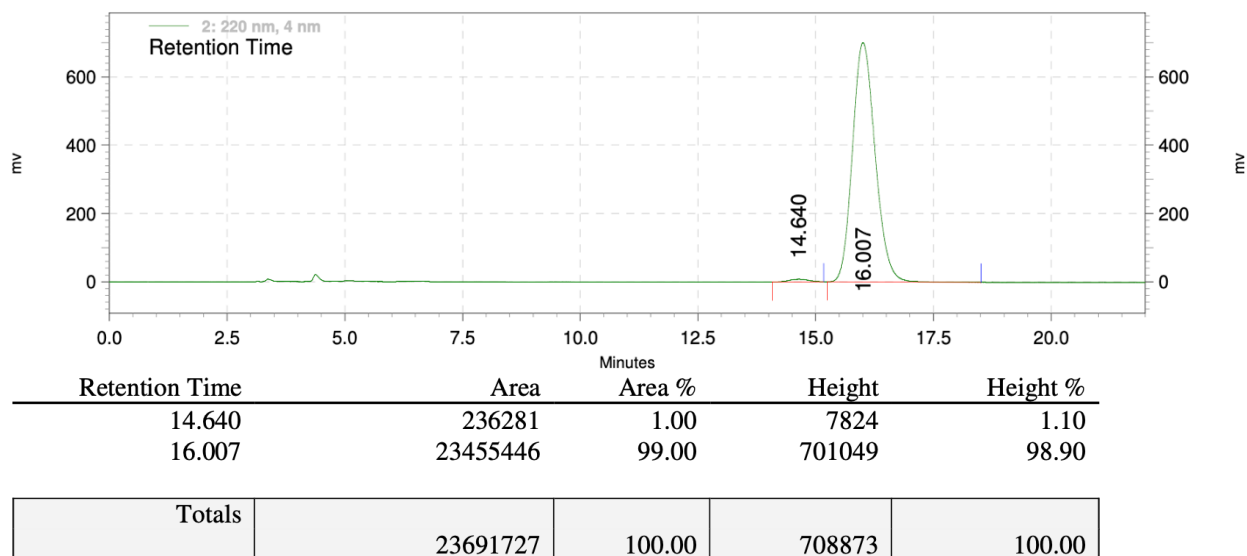

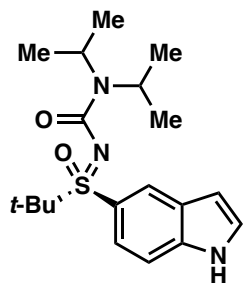

**Column:** Daicel Chiralpak IB; **Solvent:** *n*-hexane/IPA (90:10); **flowrate:** 1 mL/min  
**Chromatogram for sulfoximine: (rac)-3a**

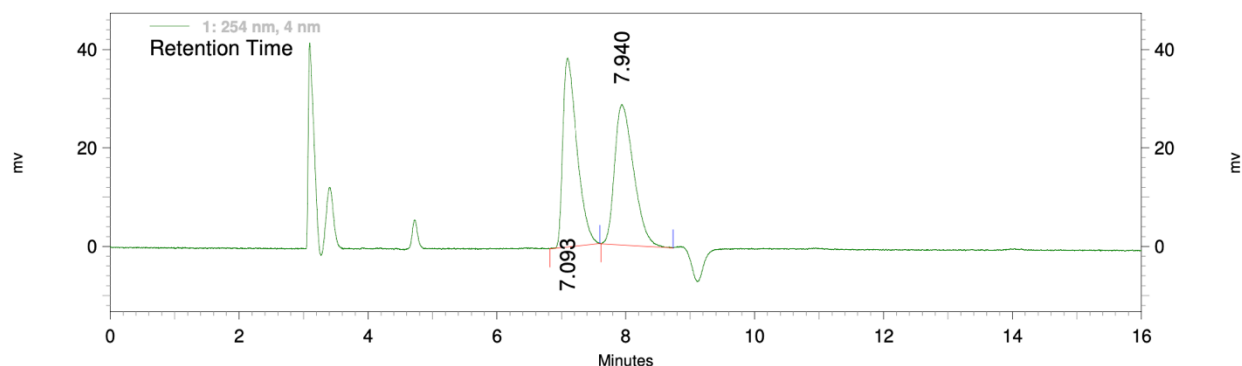

| Retention Time | Area   | Area % | Height | Height % |
|----------------|--------|--------|--------|----------|
| 7.093          | 590055 | 50.09  | 38358  | 57.35    |
| 7.940          | 587885 | 49.91  | 28527  | 42.65    |

|        |         |        |       |        |
|--------|---------|--------|-------|--------|
| Totals | 1177940 | 100.00 | 66885 | 100.00 |
|--------|---------|--------|-------|--------|

**Chromatogram for sulfoximine: (R)-3a**

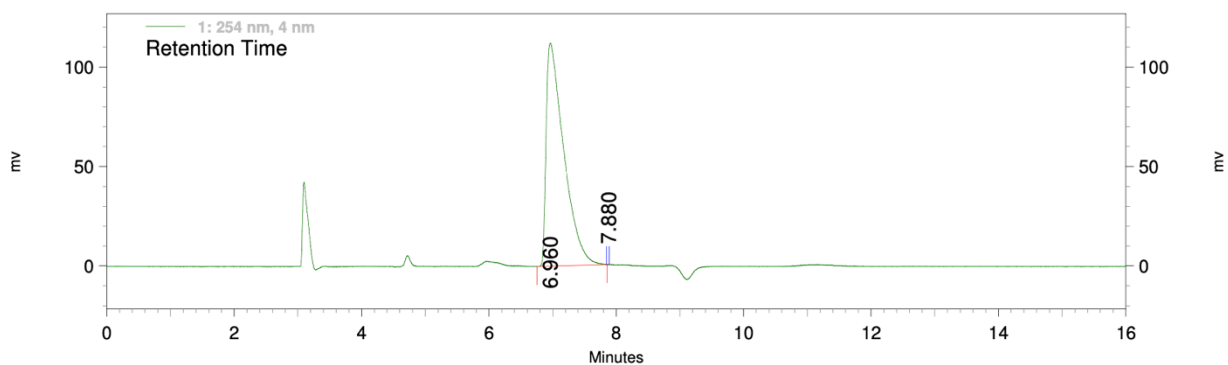

| Retention Time | Area    | Area % | Height | Height % |
|----------------|---------|--------|--------|----------|
| 6.960          | 2167328 | 99.99  | 112218 | 99.87    |
| 7.880          | 132     | 0.01   | 144    | 0.13     |

|        |         |        |        |        |
|--------|---------|--------|--------|--------|
| Totals | 2167460 | 100.00 | 112362 | 100.00 |
|--------|---------|--------|--------|--------|

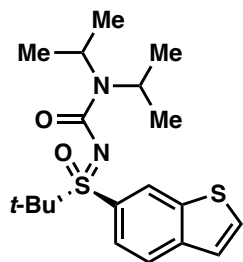

**Column:** Daicel Chiralpak IA; **Solvent:** *n*-hexane/DCM (50:50); **flowrate:** 1 mL/min  
**Chromatogram for sulfoximine: (rac)-3b**

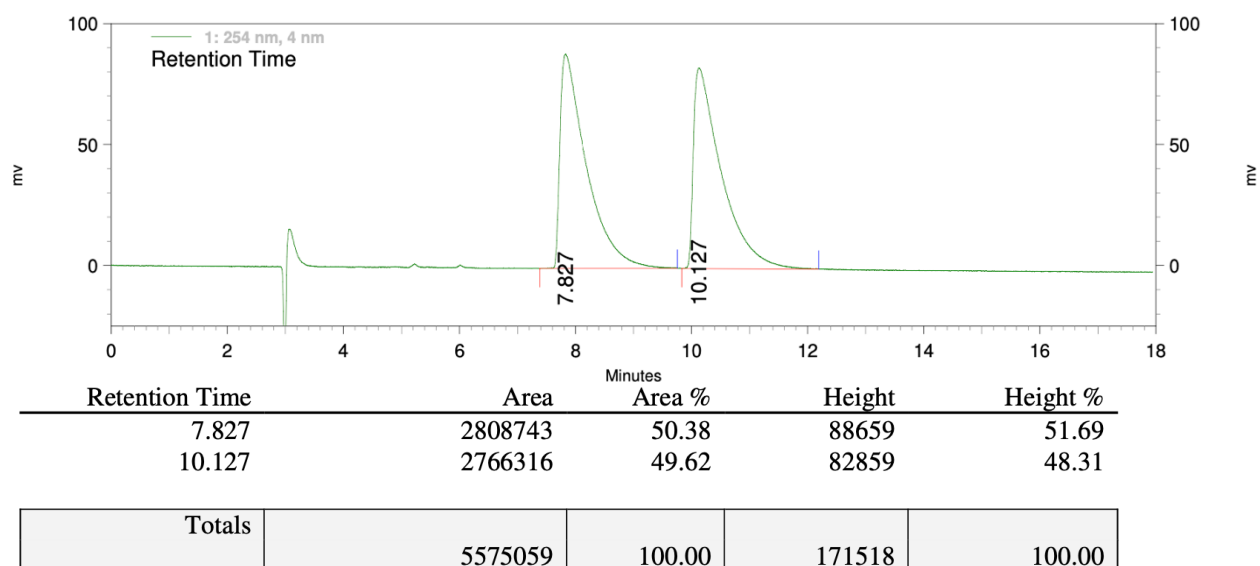

**Chromatogram for sulfoximine: (R)-3b**

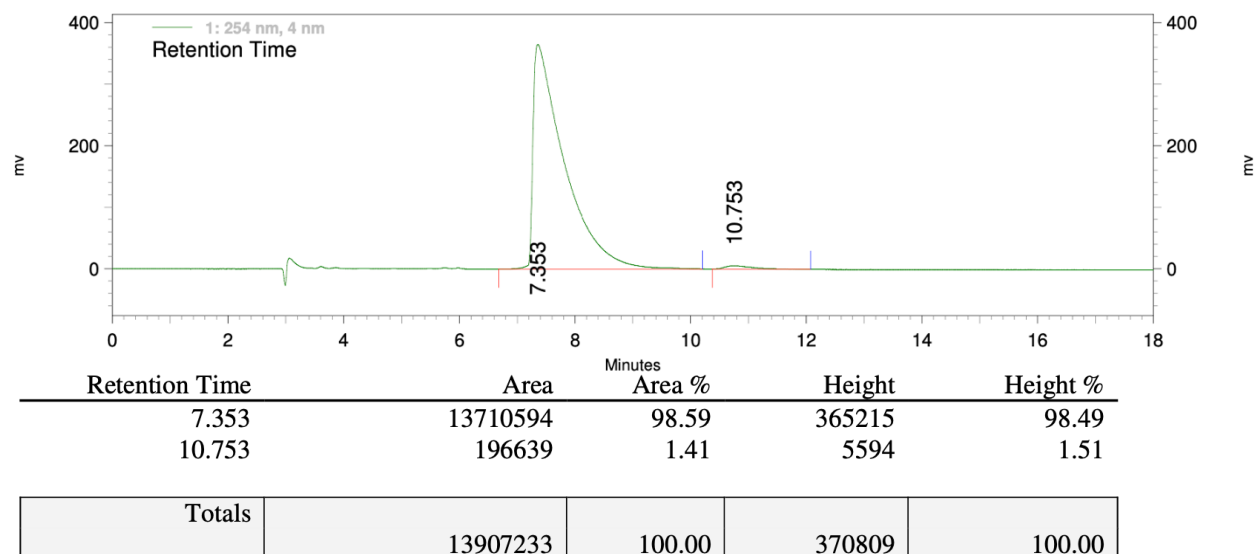

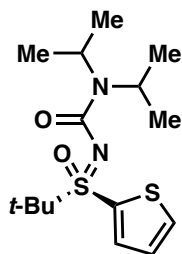

**Column:** Daicel Chiralpak IC; **Solvent:** *n*-hexane/IPA (70:30); **flowrate:** 1 mL/min  
**Chromatogram for sulfoximine: (rac)-3c**

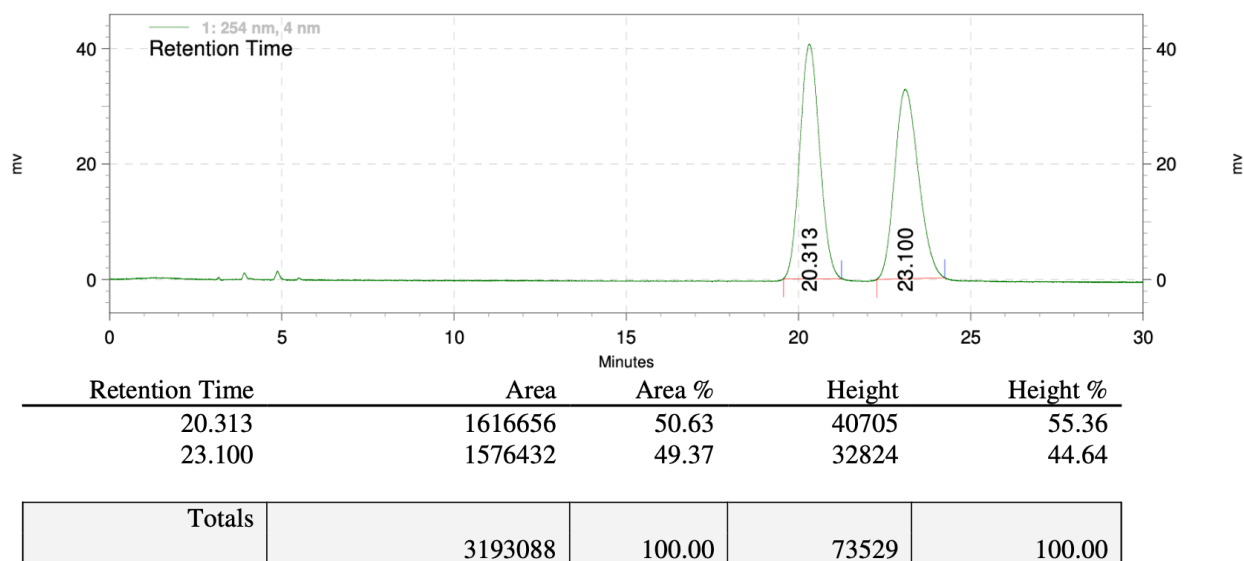

**Chromatogram for sulfoximine: (R)-3c**

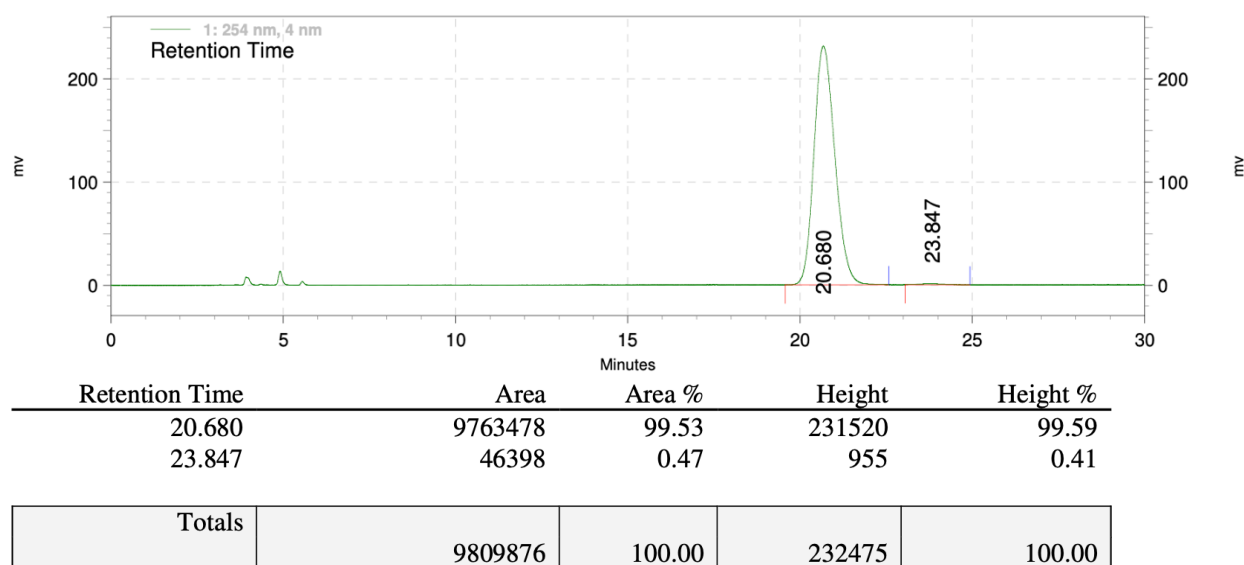

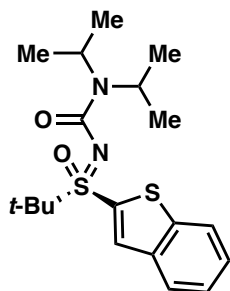

**Column:** Daicel Chiralpak IC; **Solvent:** *n*-hexane/IPA (70:30); **flowrate:** 1 mL/min  
**Chromatogram for sulfoximine: (*rac*)-3d**

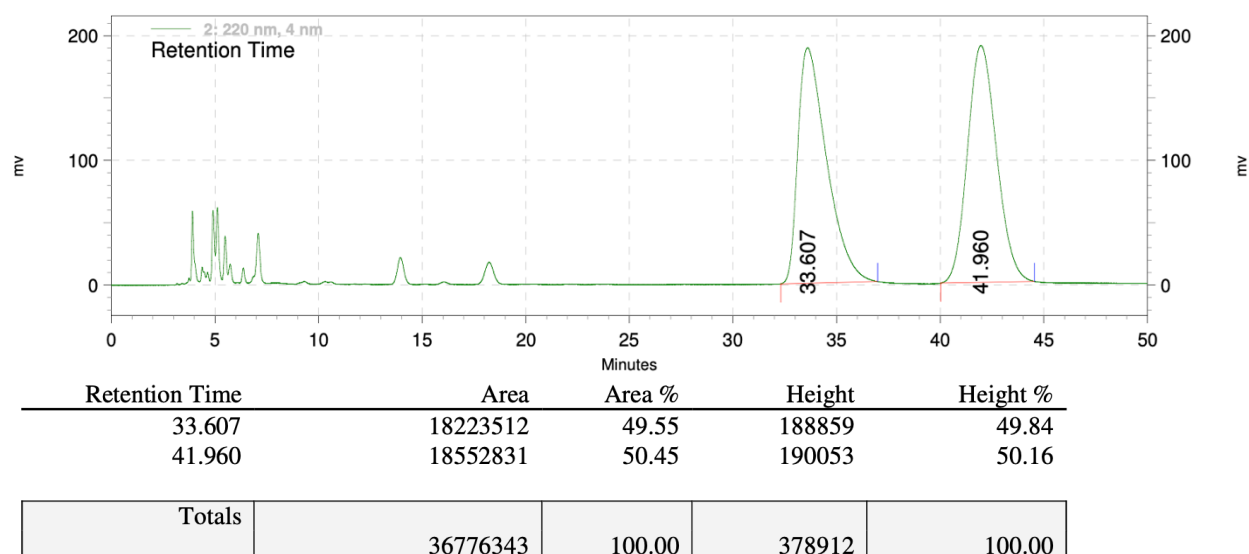

**Chromatogram for sulfoximine: (*R*)-3d**

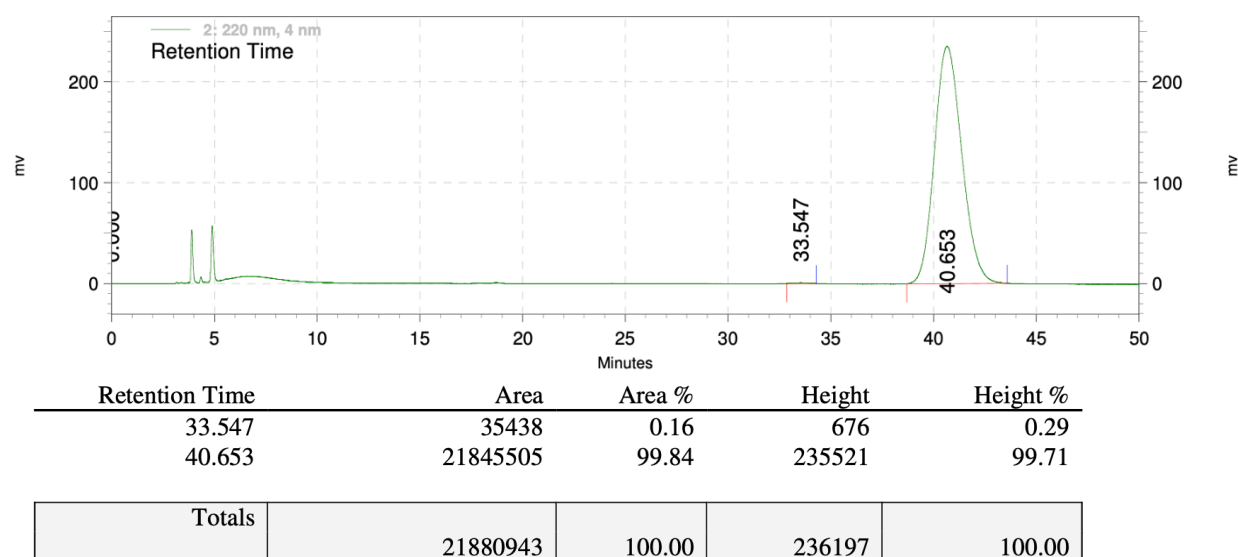

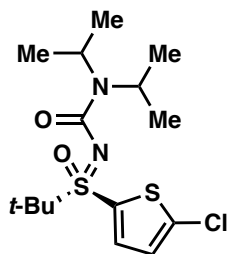

**Column:** Daicel Chiralpak IA; **Solvent:** *n*-hexane/IPA (95:05); **flowrate:** 1 mL/min  
**Chromatogram for sulfoximine: (rac)-3e**

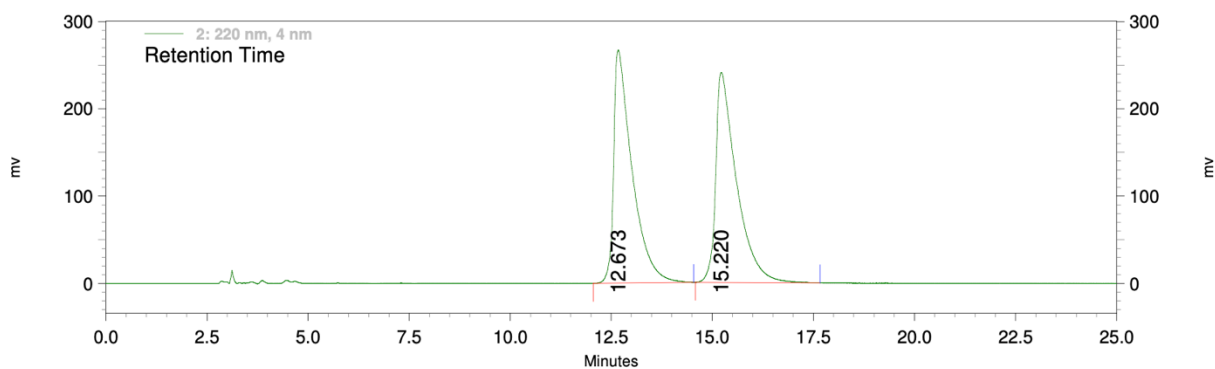

| Retention Time | Area    | Area % | Height | Height % |
|----------------|---------|--------|--------|----------|
| 12.673         | 8451507 | 49.62  | 266879 | 52.58    |
| 15.220         | 8579596 | 50.38  | 240687 | 47.42    |

|        |          |        |        |        |
|--------|----------|--------|--------|--------|
| Totals | 17031103 | 100.00 | 507566 | 100.00 |
|--------|----------|--------|--------|--------|

**Chromatogram for sulfoximine: (R)-3e**

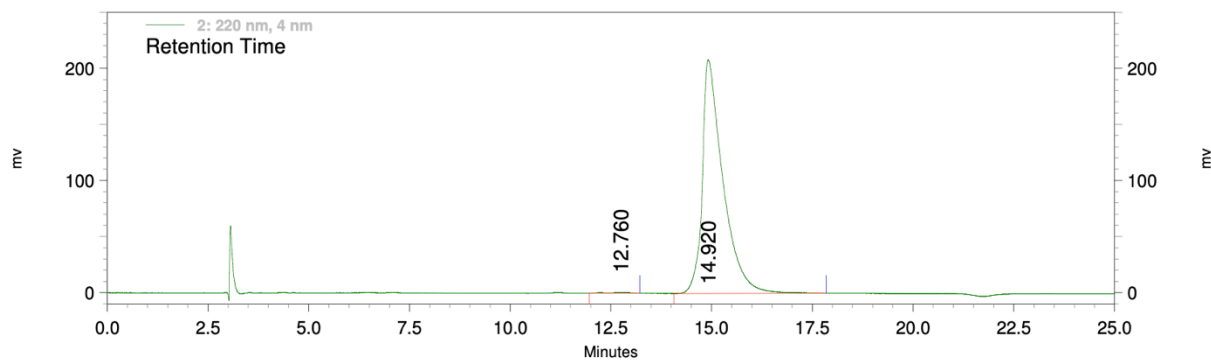

| Retention Time | Area    | Area % | Height | Height % |
|----------------|---------|--------|--------|----------|
| 12.760         | 29254   | 0.39   | 797    | 0.38     |
| 14.920         | 7439335 | 99.61  | 208227 | 99.62    |

|        |         |        |        |        |
|--------|---------|--------|--------|--------|
| Totals | 7468589 | 100.00 | 209024 | 100.00 |
|--------|---------|--------|--------|--------|

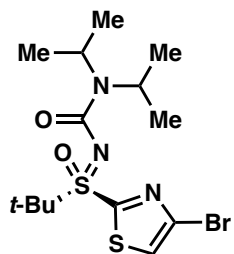

**Column:** Daicel Chiralpak IC; **Solvent:** *n*-hexane/IPA (70:30); **flowrate:** 1 mL/min  
**Chromatogram for sulfoximine: (rac)-3f**

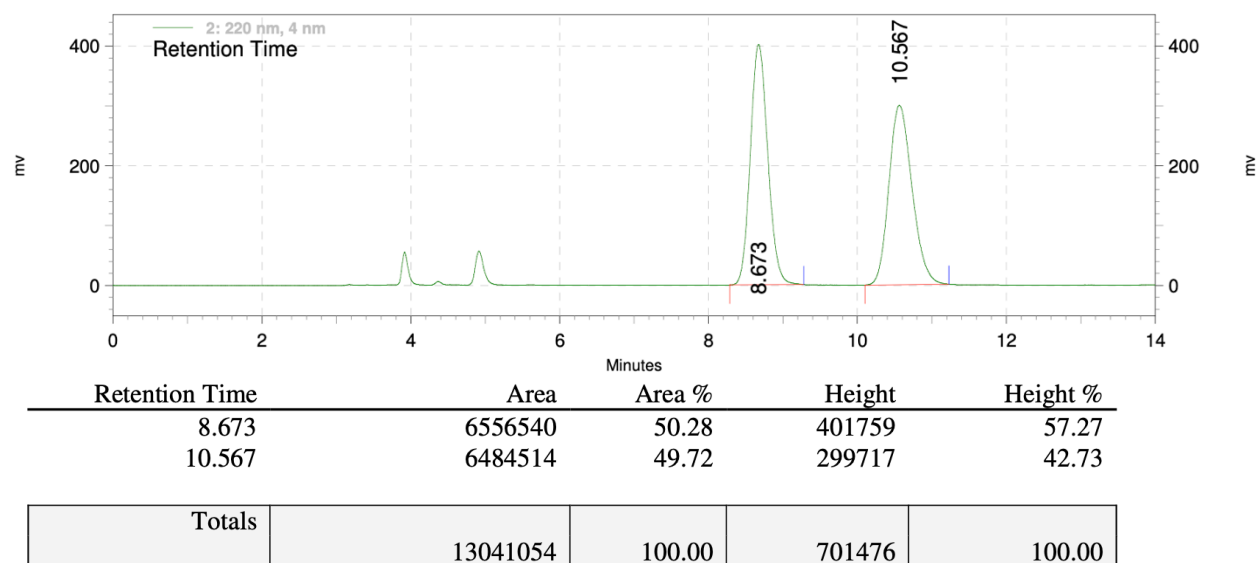

**Chromatogram for sulfoximine: (R)-3f**

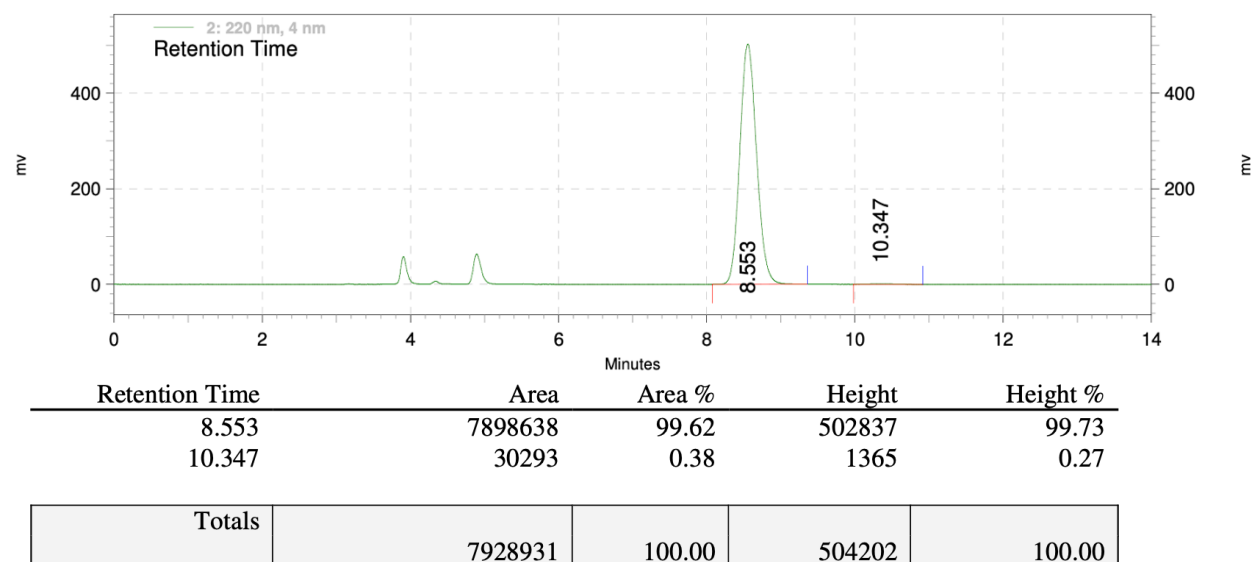

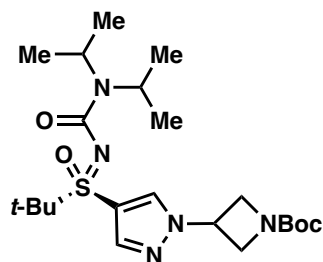

**Column:** Daicel Chiralpak IC; **Solvent:** *n*-hexane/IPA (70:30); **flowrate:** 1 mL/min  
**Chromatogram for sulfoximine: (*rac*)-3g**

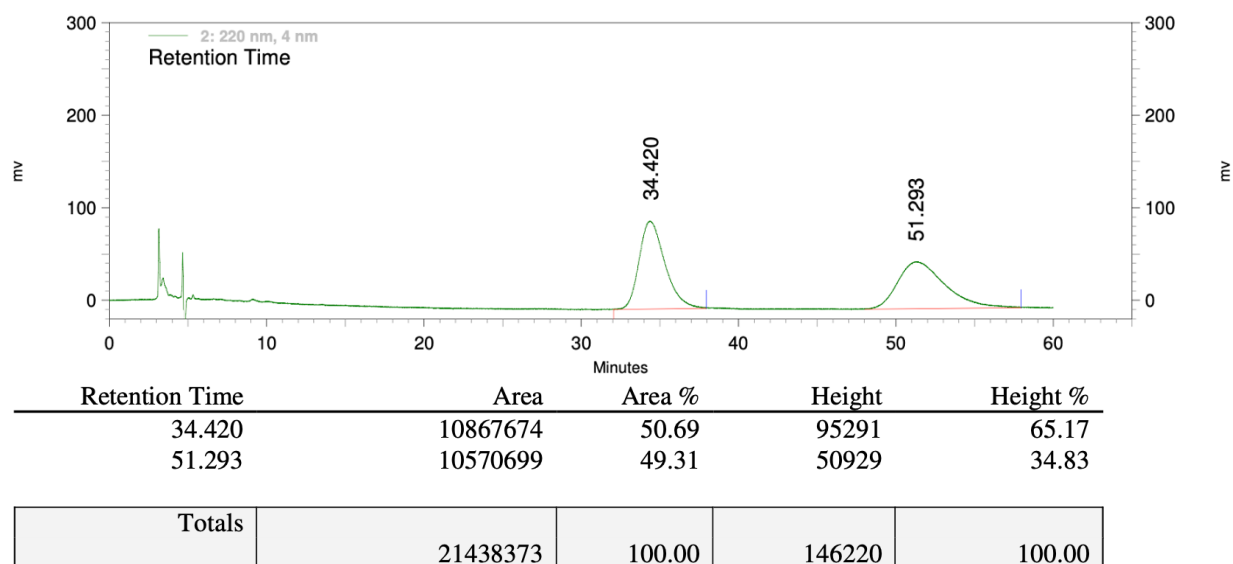

**Chromatogram for sulfoximine: (*R*)-3g**

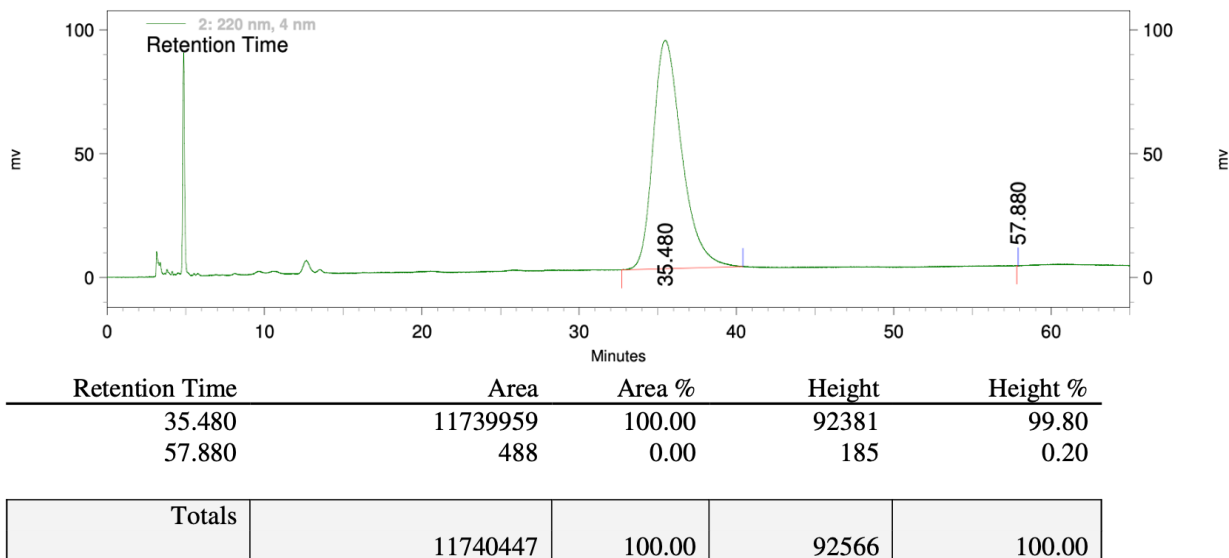

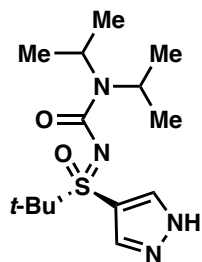

**Column:** Daicel Chiralpak IC; **Solvent:** *n*-hexane/IPA (70:30); **flowrate:** 1 mL/min  
**Chromatogram for sulfoximine: (rac)-3h**

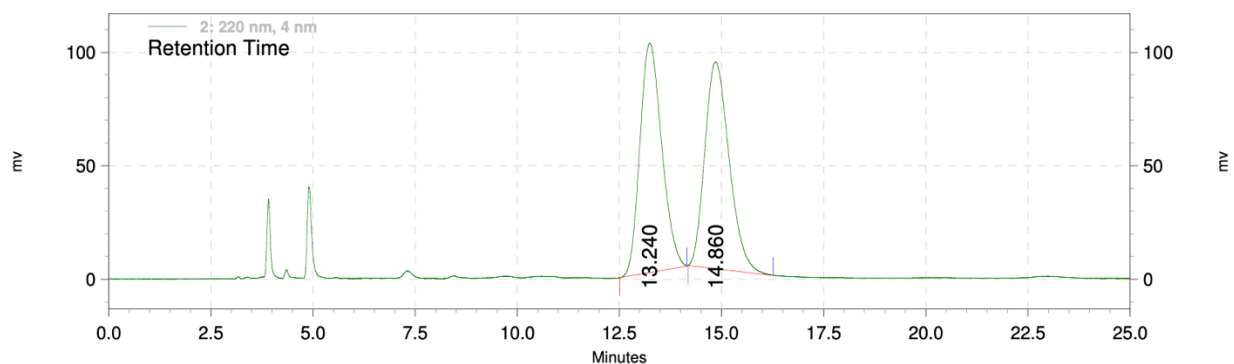

| Retention Time | Area    | Area % | Height | Height % |
|----------------|---------|--------|--------|----------|
| 13.240         | 3751069 | 49.84  | 101118 | 52.60    |
| 14.860         | 3775646 | 50.16  | 91138  | 47.40    |

|        |         |        |        |        |
|--------|---------|--------|--------|--------|
| Totals | 7526715 | 100.00 | 192256 | 100.00 |
|--------|---------|--------|--------|--------|

**Chromatogram for sulfoximine: (R)-3h**

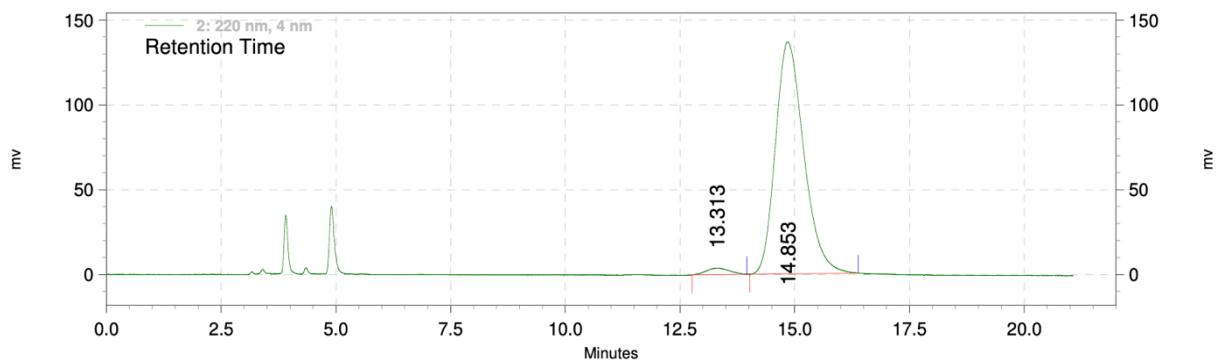

| Retention Time | Area    | Area % | Height | Height % |
|----------------|---------|--------|--------|----------|
| 13.313         | 132251  | 2.20   | 3816   | 2.71     |
| 14.853         | 5880746 | 97.80  | 136821 | 97.29    |

|        |         |        |        |        |
|--------|---------|--------|--------|--------|
| Totals | 6012997 | 100.00 | 140637 | 100.00 |
|--------|---------|--------|--------|--------|

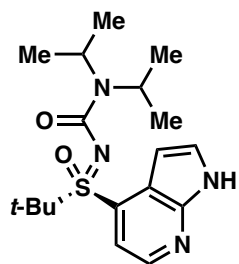

**Column:** Daicel Chiralpak IB; **Solvent:** *n*-hexane/IPA (95:05); **flowrate:** 1 mL/min  
**Chromatogram for sulfoximine: (*rac*)-3i**

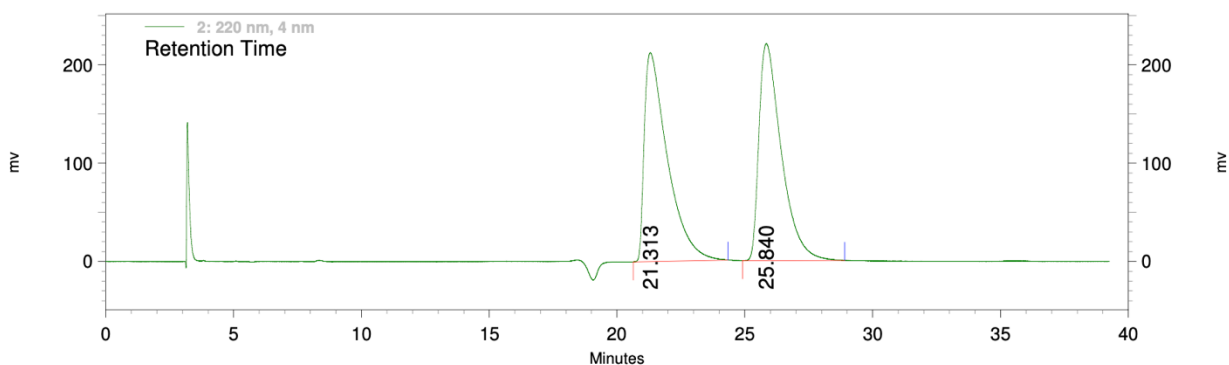

| Retention Time | Area     | Area % | Height | Height % |
|----------------|----------|--------|--------|----------|
| 21.313         | 13334158 | 49.78  | 212434 | 49.01    |
| 25.840         | 13451042 | 50.22  | 221046 | 50.99    |

|        |          |        |        |        |
|--------|----------|--------|--------|--------|
| Totals | 26785200 | 100.00 | 433480 | 100.00 |
|--------|----------|--------|--------|--------|

**Chromatogram for sulfoximine: (*R*)-3i**

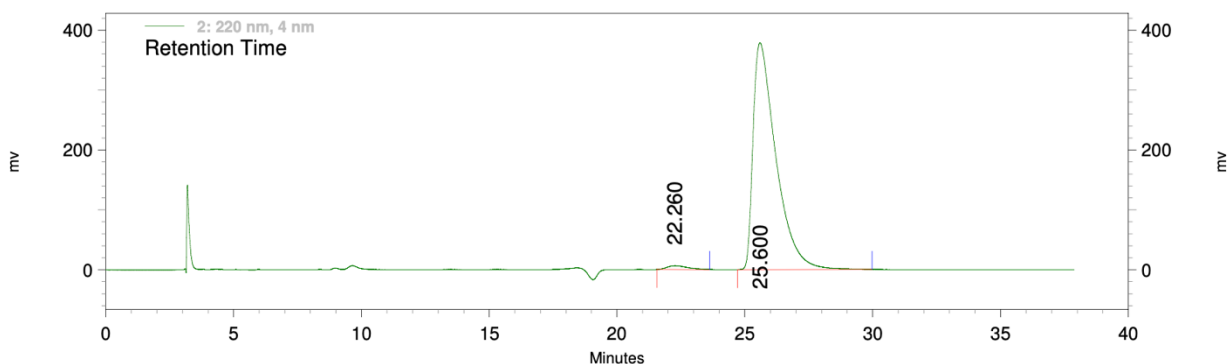

| Retention Time | Area     | Area % | Height | Height % |
|----------------|----------|--------|--------|----------|
| 22.260         | 347220   | 1.46   | 6253   | 1.62     |
| 25.600         | 23485576 | 98.54  | 378749 | 98.38    |

|        |          |        |        |        |
|--------|----------|--------|--------|--------|
| Totals | 23832796 | 100.00 | 385002 | 100.00 |
|--------|----------|--------|--------|--------|

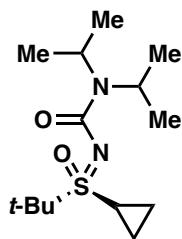

**Column:** Daicel Chiralpak IC; **Solvent:** *n*-hexane/IPA (70:30); **flowrate:** 1 mL/min  
**Chromatogram for sulfoximine: (rac)-4a**

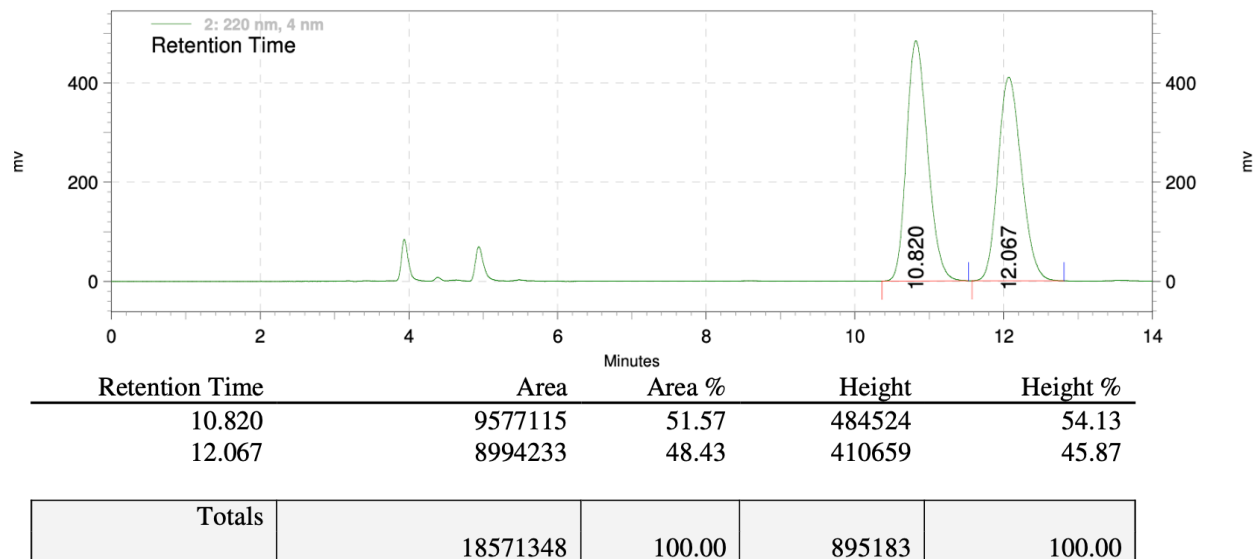

**Chromatogram for sulfoximine: (S)-4a**

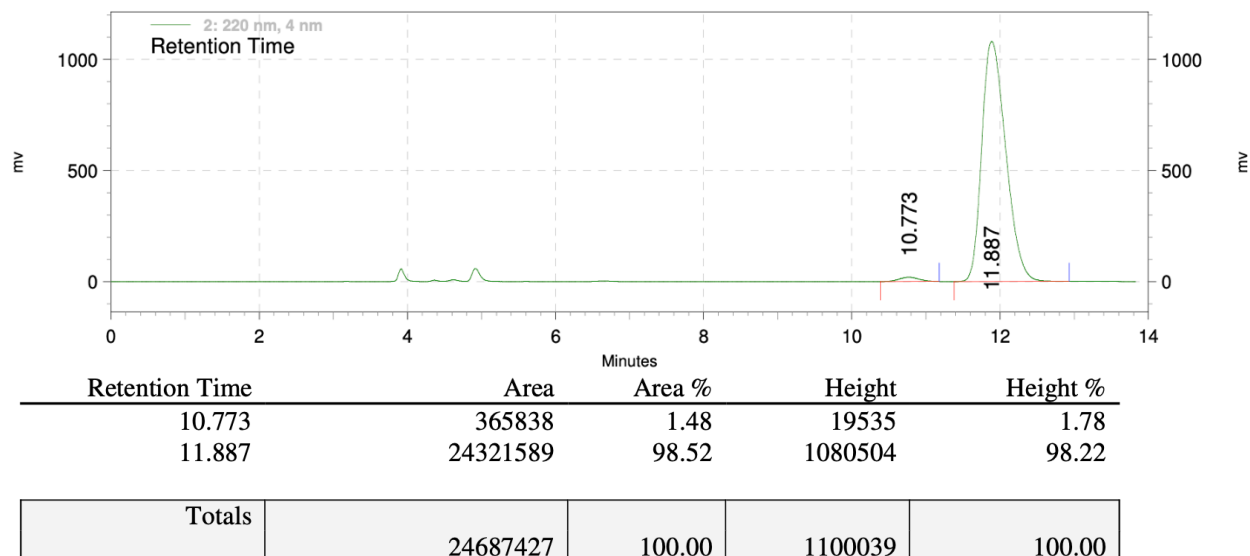

# Chromatogram for sulfoximine: (S)-4a after single recrystallization

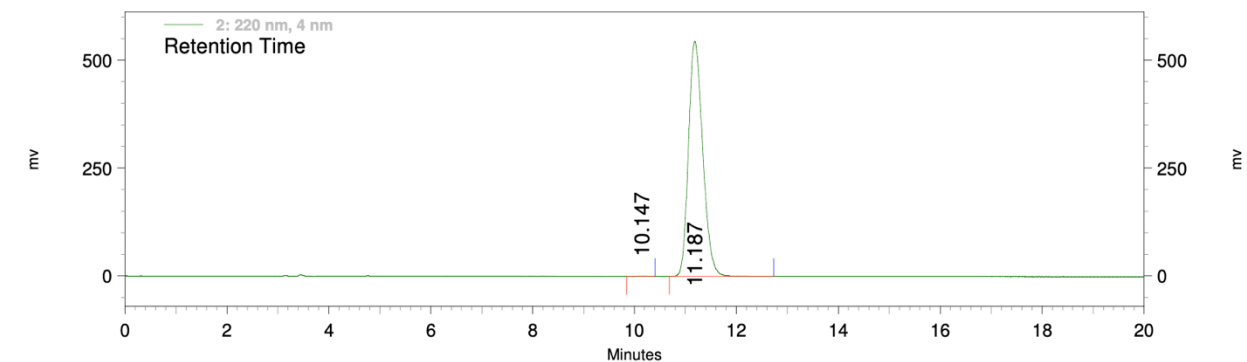

| Retention Time | Area     | Area % | Height | Height % |
|----------------|----------|--------|--------|----------|
| 10.147         | 6230     | 0.06   | 399    | 0.07     |
| 11.187         | 10605693 | 99.94  | 545456 | 99.93    |

|        |          |        |        |        |
|--------|----------|--------|--------|--------|
| Totals | 10611923 | 100.00 | 545855 | 100.00 |
|--------|----------|--------|--------|--------|

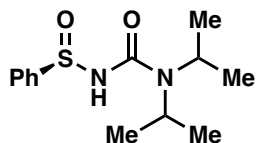

**Column:** Daicel Chiralpak IA; **Solvent:** *n*-hexane/DCM (50:50); **flowrate:** 1 mL/min  
**Chromatogram for sulfinamide: (*rac*)-phenyl sulfinyl urea (*rac*)-S5a**

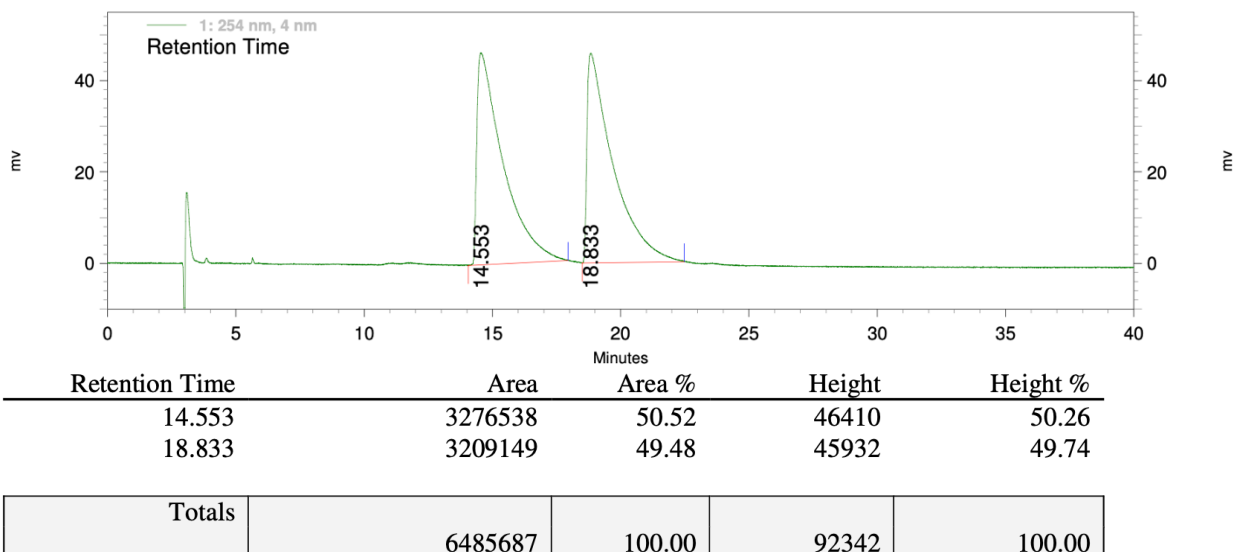

**Chromatogram for sulfinamide: (*R*)-phenyl sulfinyl urea (*R*)-S5a**

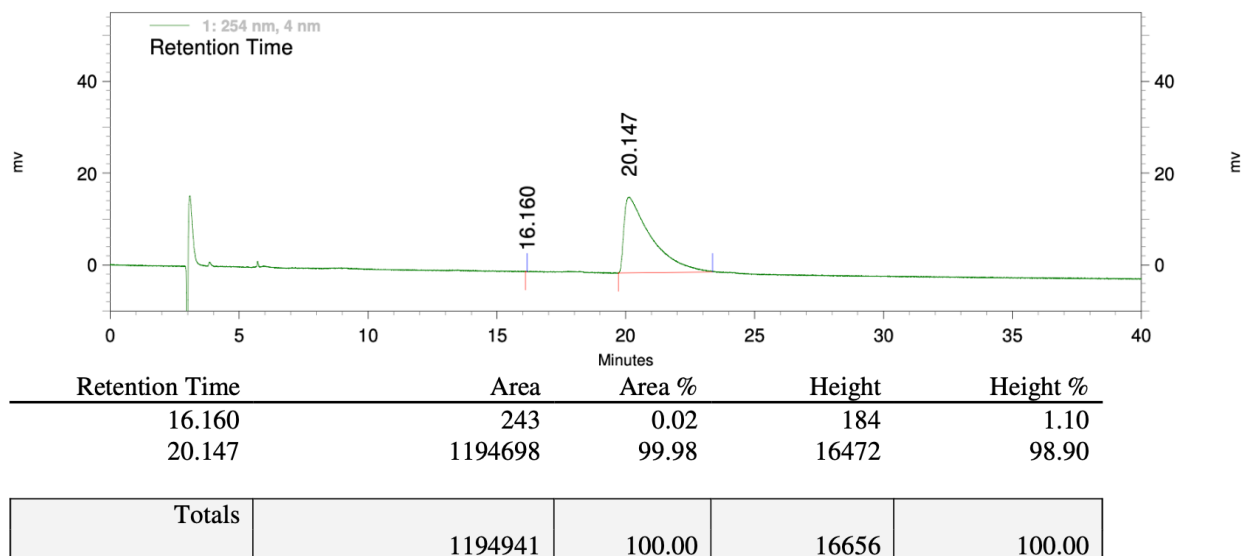

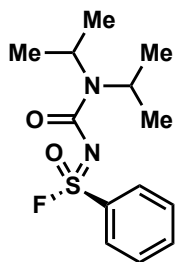

**Column:** Daicel Chiralpak IC; **Solvent:** *n*-hexane/IPA (70:30); **flowrate:** 1 mL/min  
**Chromatogram for sulfonimidoyl fluoride: (rac)-S6a**

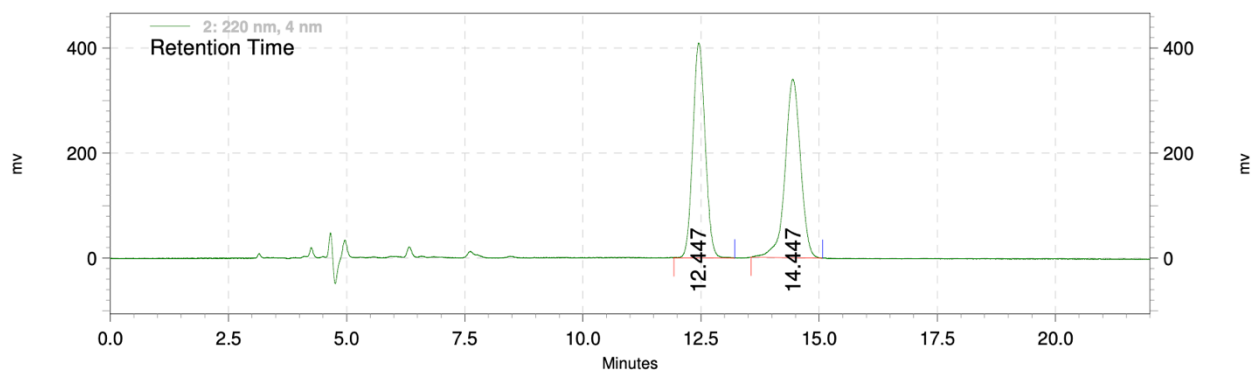

| Retention Time | Area    | Area % | Height | Height % |
|----------------|---------|--------|--------|----------|
| 12.447         | 7379945 | 48.96  | 409106 | 54.62    |
| 14.447         | 7693588 | 51.04  | 339913 | 45.38    |

|        |          |        |        |        |
|--------|----------|--------|--------|--------|
| Totals | 15073533 | 100.00 | 749019 | 100.00 |
|--------|----------|--------|--------|--------|

**Chromatogram for sulfonimidoyl fluoride: (S)-S6a**

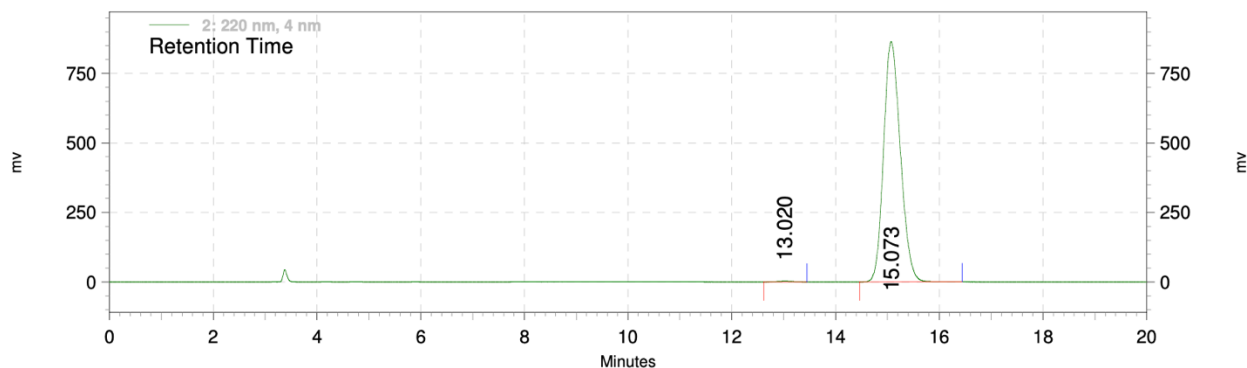

| Retention Time | Area     | Area % | Height | Height % |
|----------------|----------|--------|--------|----------|
| 13.020         | 57920    | 0.30   | 2969   | 0.34     |
| 15.073         | 19475238 | 99.70  | 864434 | 99.66    |

|        |          |        |        |        |
|--------|----------|--------|--------|--------|
| Totals | 19533158 | 100.00 | 867403 | 100.00 |
|--------|----------|--------|--------|--------|

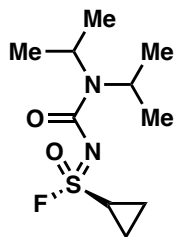

**Column:** Daicel Chiralpak IC; **Solvent:** *n*-hexane/IPA (70:30); **flowrate:** 1 mL/min  
**Chromatogram for sulfonimidoyl fluoride: (rac)- cyclopropyl-SF**

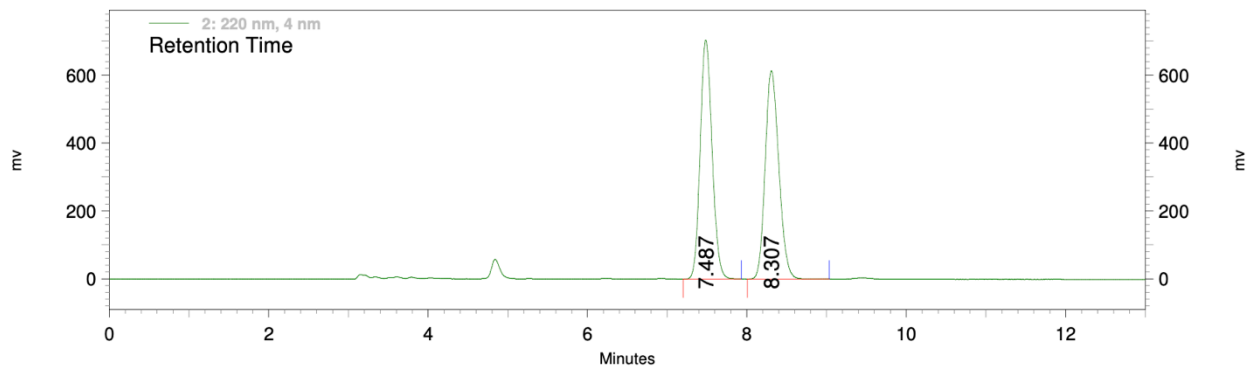

| Retention Time | Area    | Area % | Height | Height % |
|----------------|---------|--------|--------|----------|
| 7.487          | 7344826 | 50.10  | 704121 | 53.42    |
| 8.307          | 7316847 | 49.90  | 613965 | 46.58    |

|        |          |        |         |        |
|--------|----------|--------|---------|--------|
| Totals | 14661673 | 100.00 | 1318086 | 100.00 |
|--------|----------|--------|---------|--------|

**Chromatogram for sulfonimidoyl fluoride: (S)- cyclopropyl-SF**

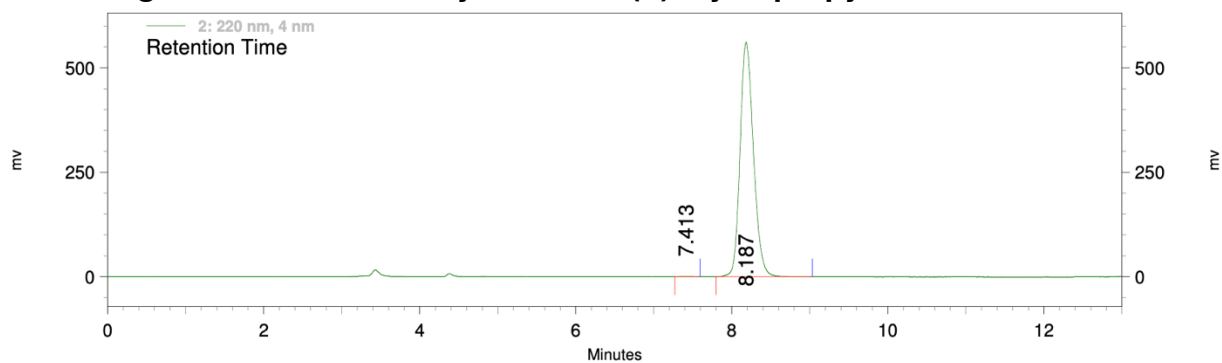

| Retention Time | Area    | Area % | Height | Height % |
|----------------|---------|--------|--------|----------|
| 7.413          | 10523   | 0.16   | 1097   | 0.19     |
| 8.187          | 6712187 | 99.84  | 561816 | 99.81    |

|        |         |        |        |        |
|--------|---------|--------|--------|--------|
| Totals | 6722710 | 100.00 | 562913 | 100.00 |
|--------|---------|--------|--------|--------|

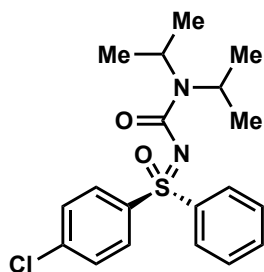

**Column:** Daicel Chiralpak IC; **Solvent:** *n*-hexane/IPA (70:30); **flowrate:** 1 mL/min  
**Chromatogram for sulfoximine: (rac)-7a**

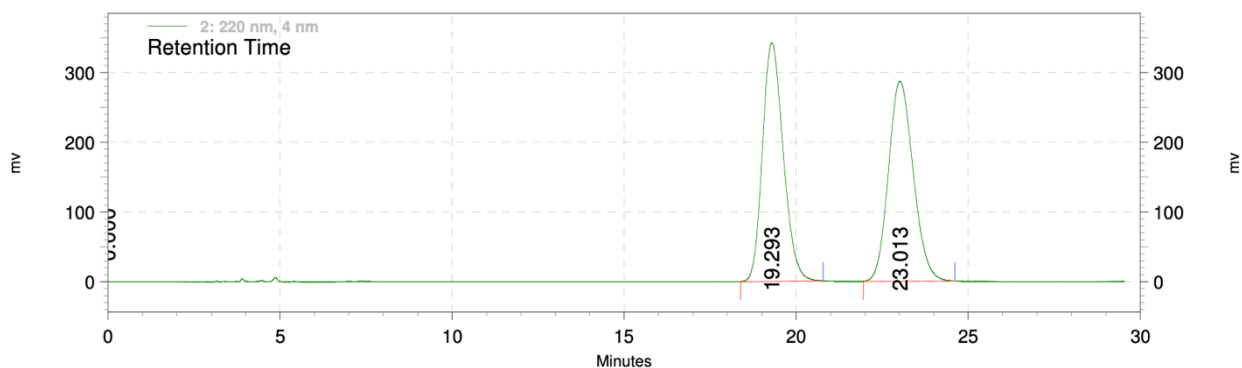

| Retention Time | Area     | Area % | Height | Height % |
|----------------|----------|--------|--------|----------|
| 19.293         | 14355225 | 50.03  | 342360 | 54.41    |
| 23.013         | 14335407 | 49.97  | 286862 | 45.59    |

|        |          |        |        |        |
|--------|----------|--------|--------|--------|
| Totals | 28690632 | 100.00 | 629222 | 100.00 |
|--------|----------|--------|--------|--------|

**Chromatogram for sulfoximine: (R)-7a**

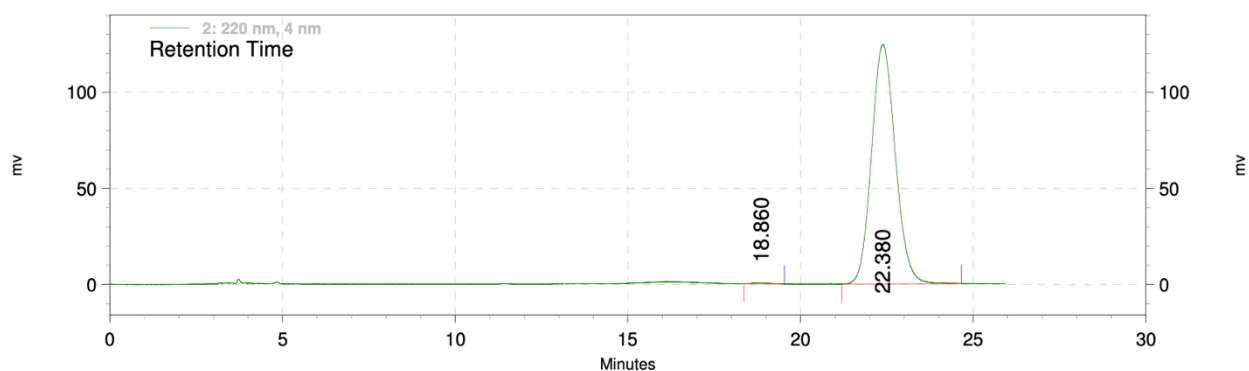

| Retention Time | Area    | Area % | Height | Height % |
|----------------|---------|--------|--------|----------|
| 18.860         | 20170   | 0.34   | 538    | 0.43     |
| 22.380         | 5945664 | 99.66  | 124438 | 99.57    |

|        |         |        |        |        |
|--------|---------|--------|--------|--------|
| Totals | 5965834 | 100.00 | 124976 | 100.00 |
|--------|---------|--------|--------|--------|

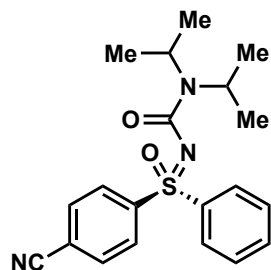

**Column:** Daicel Chiralpak IC; **Solvent:** *n*-hexane/IPA (70:30); **flowrate:** 1 mL/min  
**Chromatogram for sulfoximine: (rac)-7b**

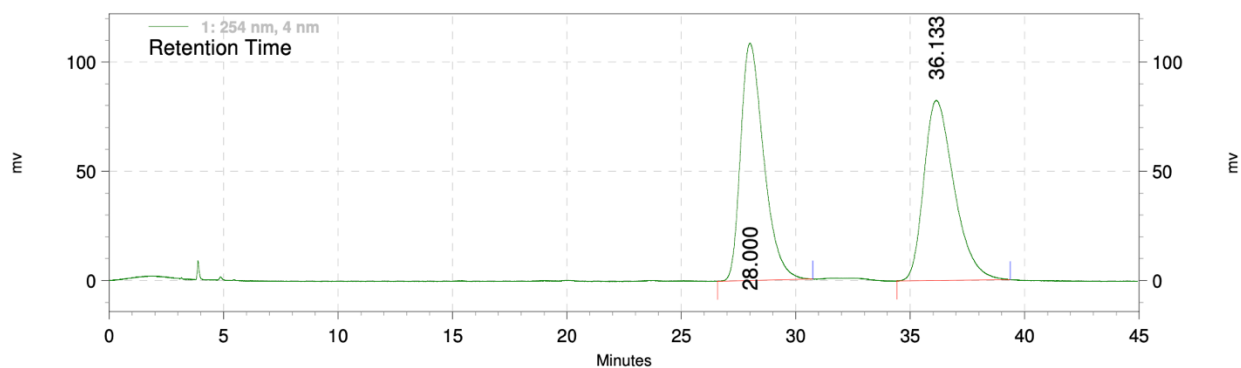

| Retention Time | Area    | Area % | Height | Height % |
|----------------|---------|--------|--------|----------|
| 28.000         | 7624109 | 50.15  | 108717 | 56.85    |
| 36.133         | 7578306 | 49.85  | 82505  | 43.15    |

|        |          |        |        |        |
|--------|----------|--------|--------|--------|
| Totals | 15202415 | 100.00 | 191222 | 100.00 |
|--------|----------|--------|--------|--------|

**Chromatogram for sulfoximine: (R)-7b**

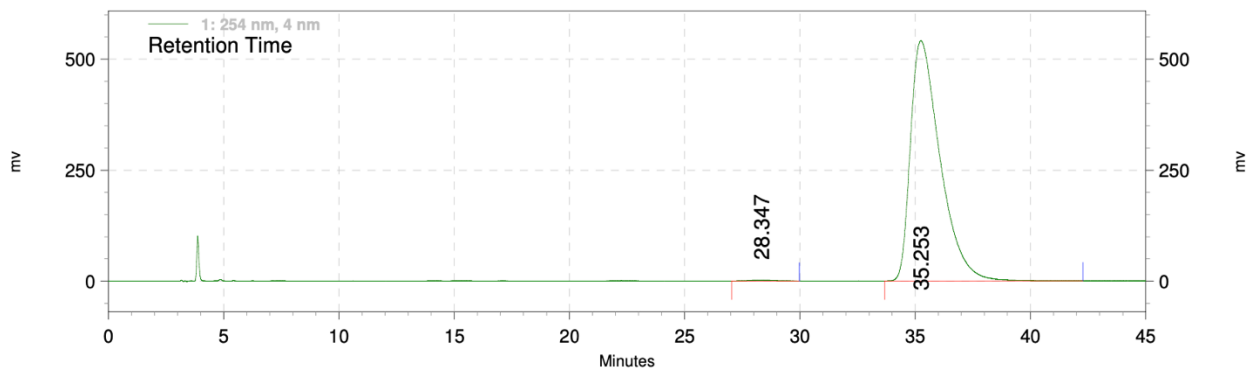

| Retention Time | Area     | Area % | Height | Height % |
|----------------|----------|--------|--------|----------|
| 28.347         | 172915   | 0.36   | 2319   | 0.43     |
| 35.253         | 48407244 | 99.64  | 541447 | 99.57    |

|        |          |        |        |        |
|--------|----------|--------|--------|--------|
| Totals | 48580159 | 100.00 | 543766 | 100.00 |
|--------|----------|--------|--------|--------|

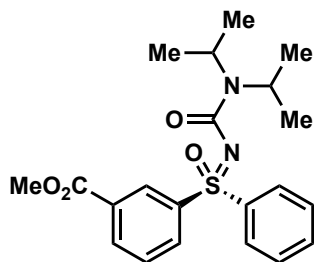

**Column:** Daicel Chiralpak IB; **Solvent:** *n*-hexane/IPA (95:05); **flowrate:** 1 mL/min  
**Chromatogram for sulfoximine: (*rac*)-7c**

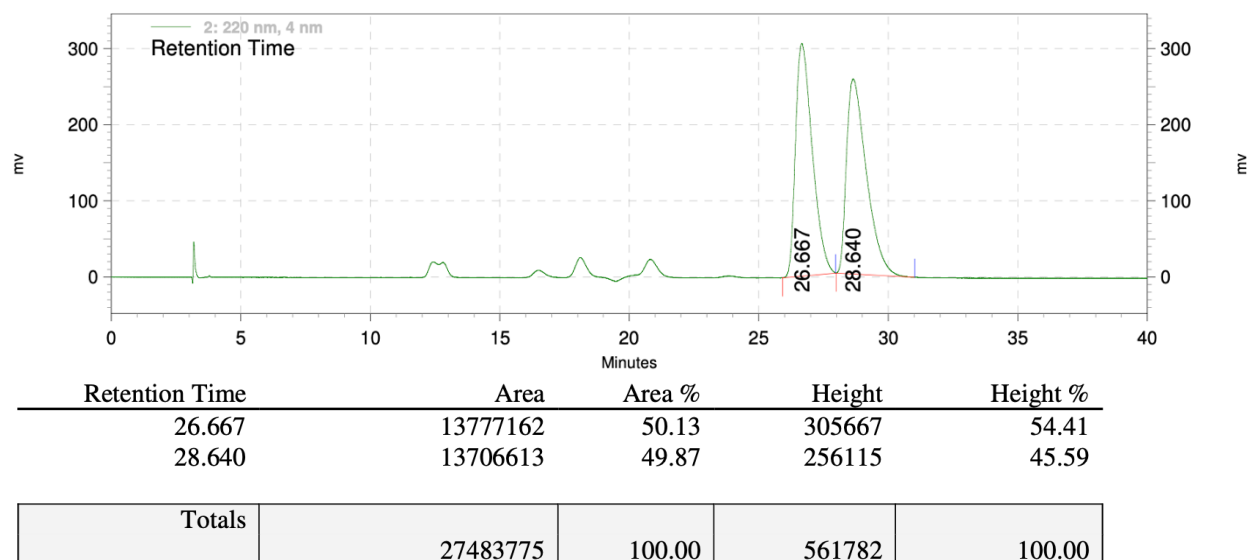

**Chromatogram for sulfoximine: (*R*)-7c**

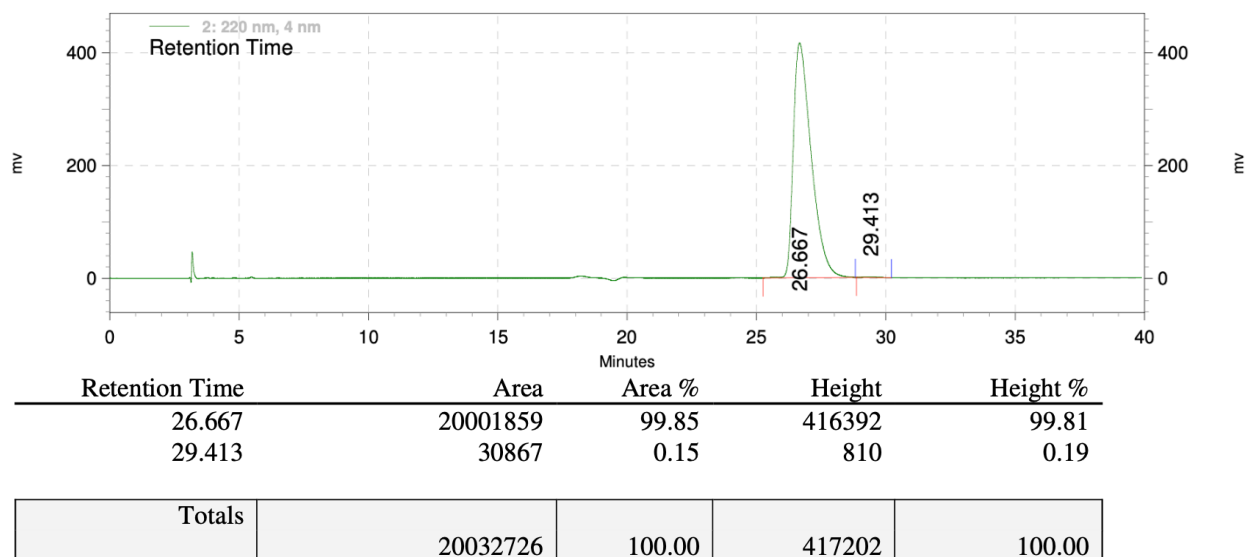

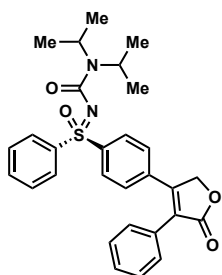

**Column:** Daicel Chiralpak IC; **Solvent:** *n*-hexane/IPA (70:30); **flowrate:** 1 mL/min  
**Chromatogram for sulfoximine: (rac)-7d**

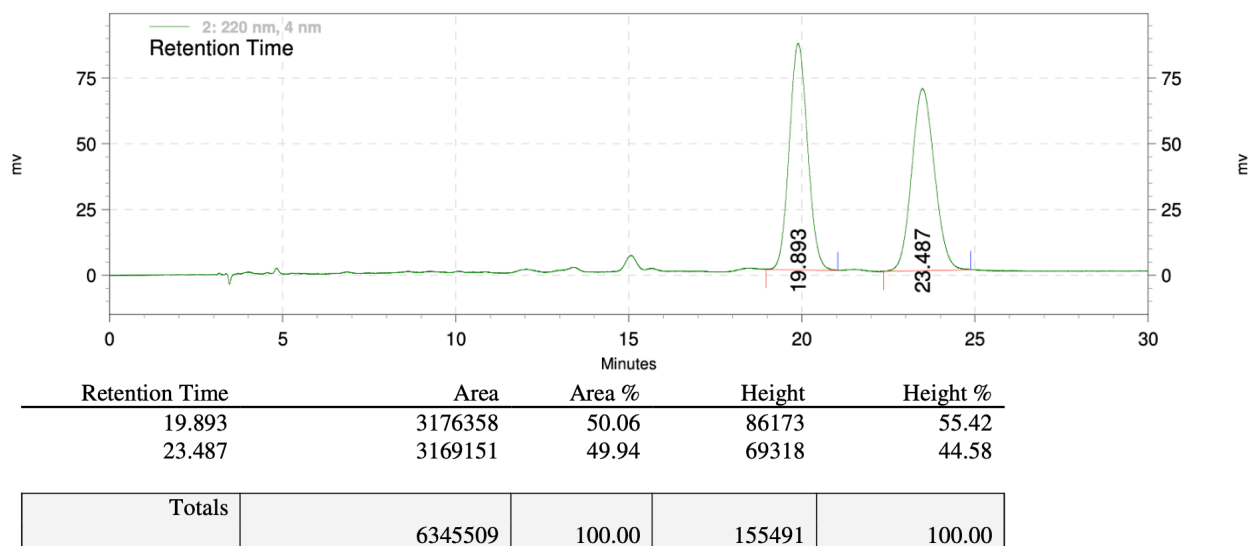

**Chromatogram for sulfoximine: (R)-7d**

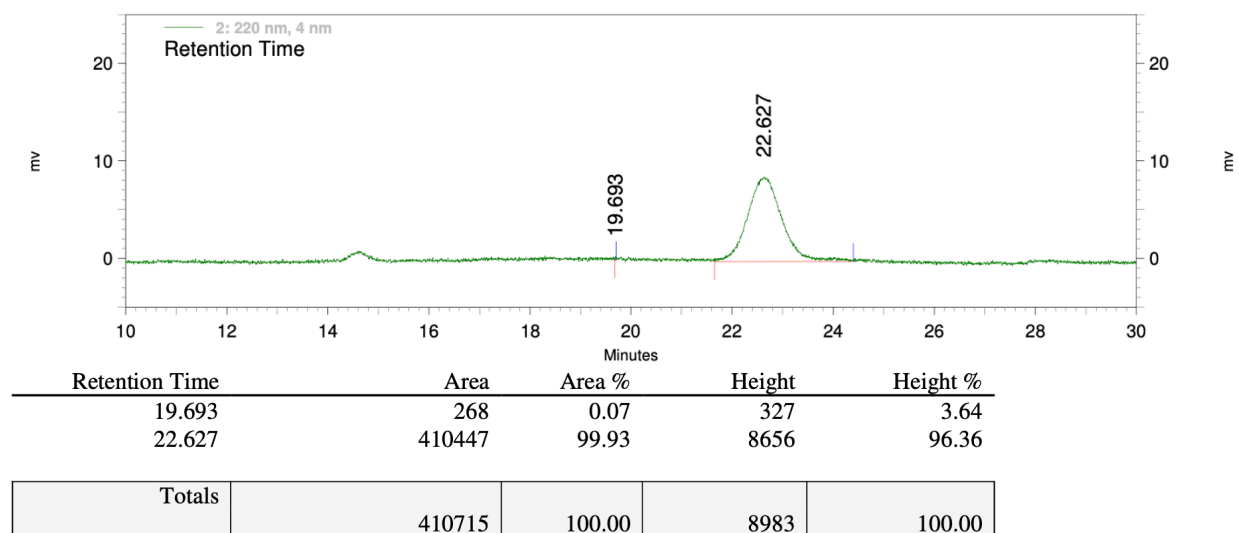

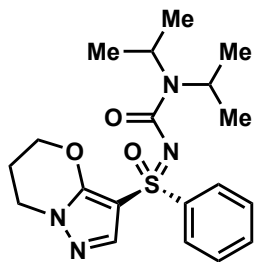

**Column:** Daicel Chiralpak IB; **Solvent:** *n*-hexane/IPA (90:10); **flowrate:** 1 mL/min  
**Chromatogram for sulfoximine: (*rac*)-7e**

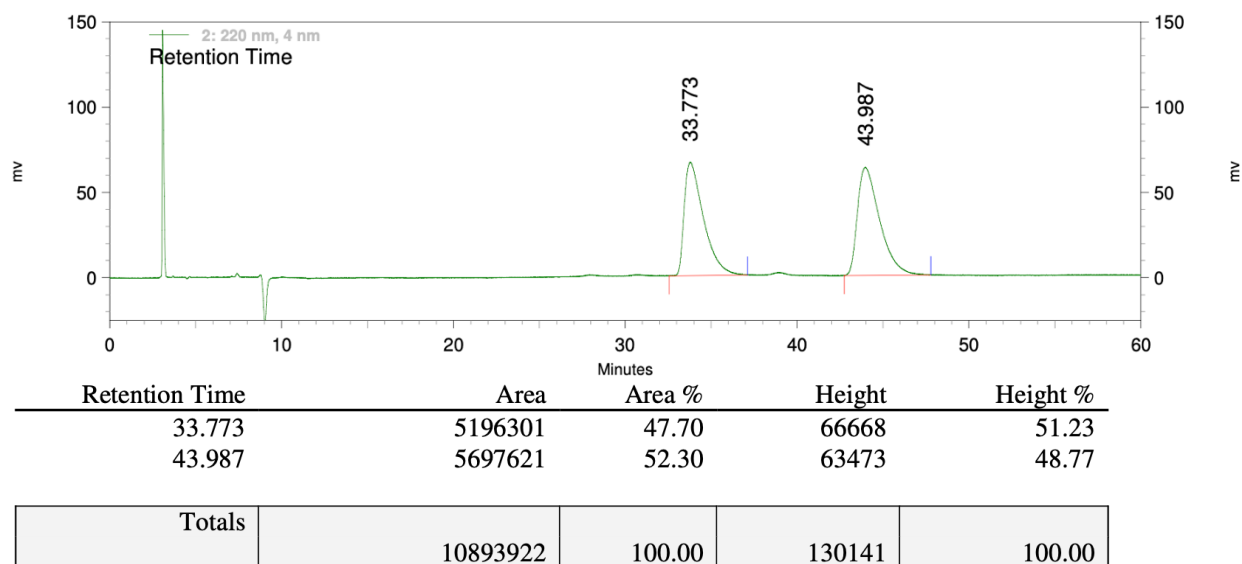

**Chromatogram for sulfoximine: (*R*)-7e**

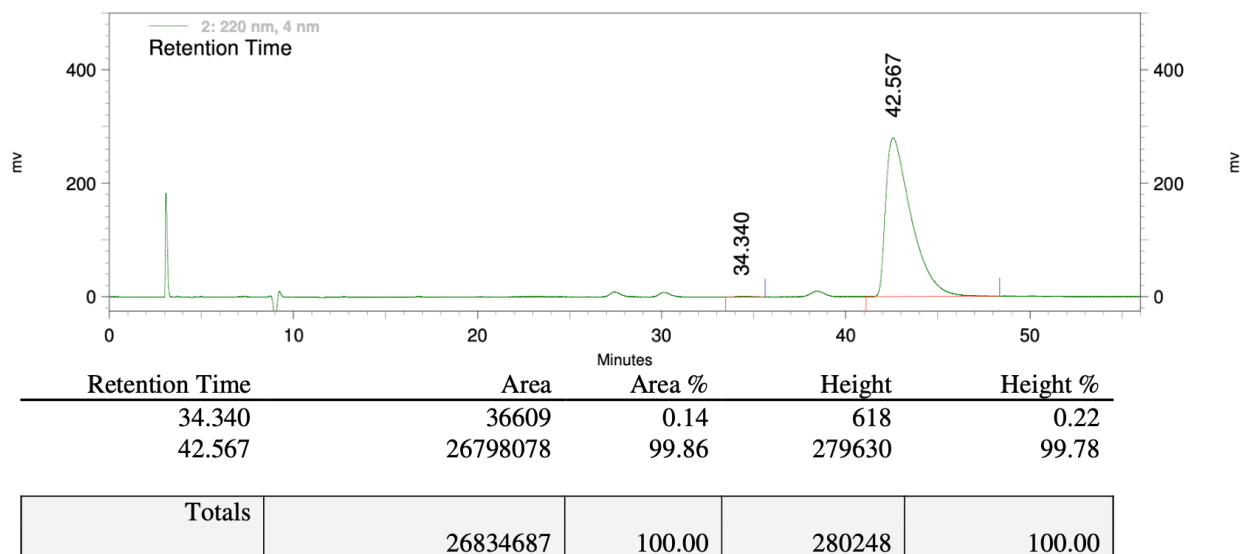

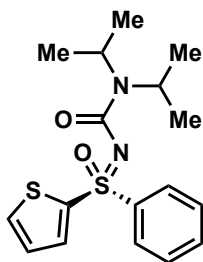

**Column:** Daicel Chiralpak IC; **Solvent:** *n*-hexane/IPA (70:30); **flowrate:** 1 mL/min  
**Chromatogram for sulfoximine: (*rac*)-7f**

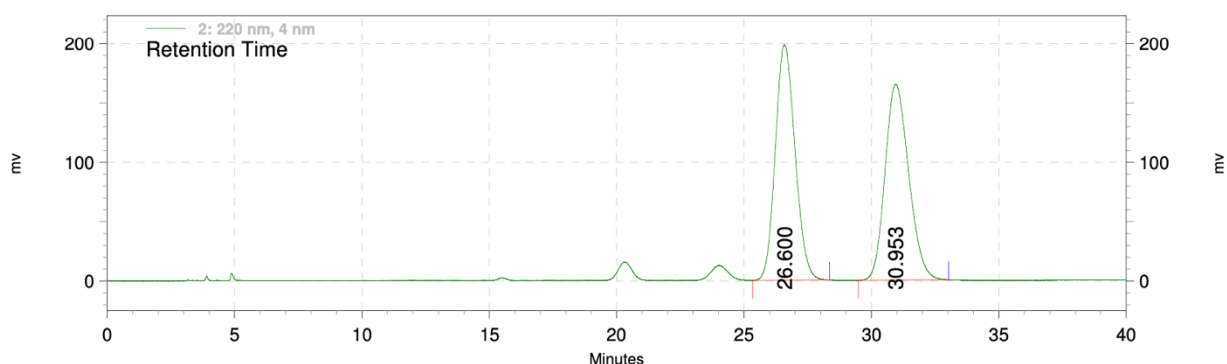

| Retention Time | Area     | Area % | Height | Height % |
|----------------|----------|--------|--------|----------|
| 26.600         | 10694284 | 50.00  | 198338 | 54.58    |
| 30.953         | 10696261 | 50.00  | 165040 | 45.42    |

|        |          |        |        |        |
|--------|----------|--------|--------|--------|
| Totals | 21390545 | 100.00 | 363378 | 100.00 |
|--------|----------|--------|--------|--------|

**Chromatogram for sulfoximine: (*R*)-7f**

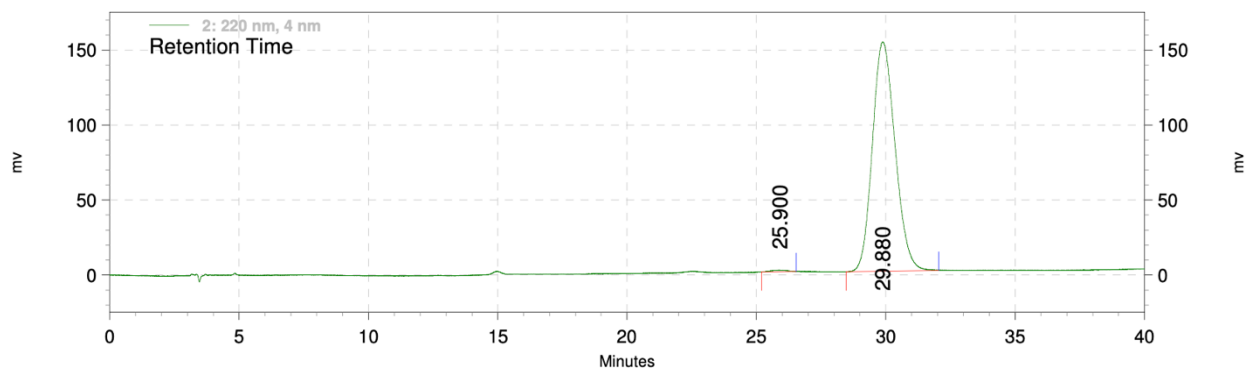

| Retention Time | Area    | Area % | Height | Height % |
|----------------|---------|--------|--------|----------|
| 25.900         | 41837   | 0.45   | 1017   | 0.66     |
| 29.880         | 9315452 | 99.55  | 152884 | 99.34    |

|        |         |        |        |        |
|--------|---------|--------|--------|--------|
| Totals | 9357289 | 100.00 | 153901 | 100.00 |
|--------|---------|--------|--------|--------|

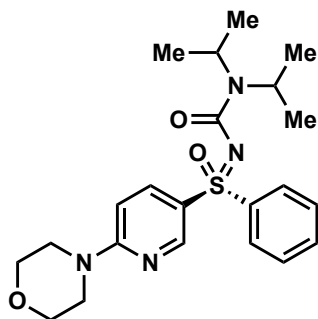

**Column:** Daicel Chiralpak IB; **Solvent:** *n*-hexane/IPA (90:10); **flowrate:** 1 mL/min  
**Chromatogram for sulfoximine: (rac)-7g**

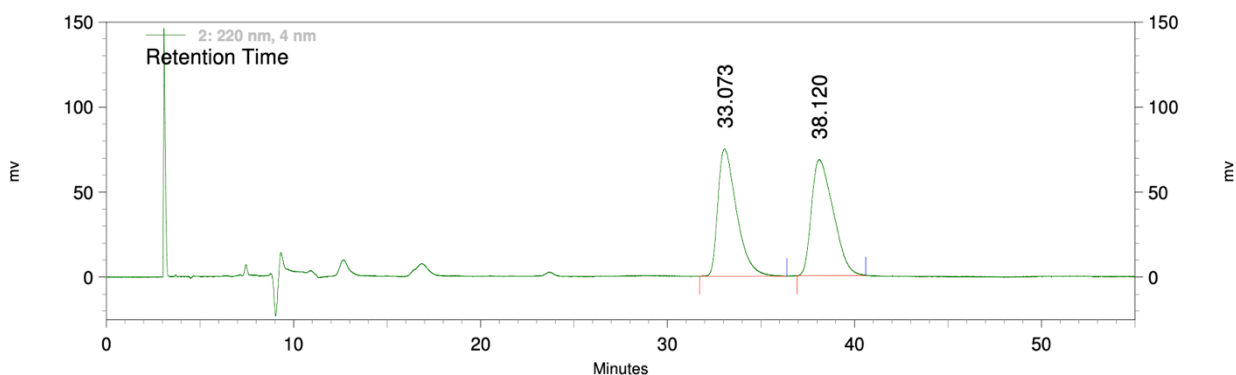

| Retention Time | Area    | Area % | Height | Height % |
|----------------|---------|--------|--------|----------|
| 33.073         | 5242522 | 48.82  | 74948  | 52.34    |
| 38.120         | 5495849 | 51.18  | 68257  | 47.66    |

|        |          |        |        |        |
|--------|----------|--------|--------|--------|
| Totals | 10738371 | 100.00 | 143205 | 100.00 |
|--------|----------|--------|--------|--------|

**Chromatogram for sulfoximine: (R)-7g**

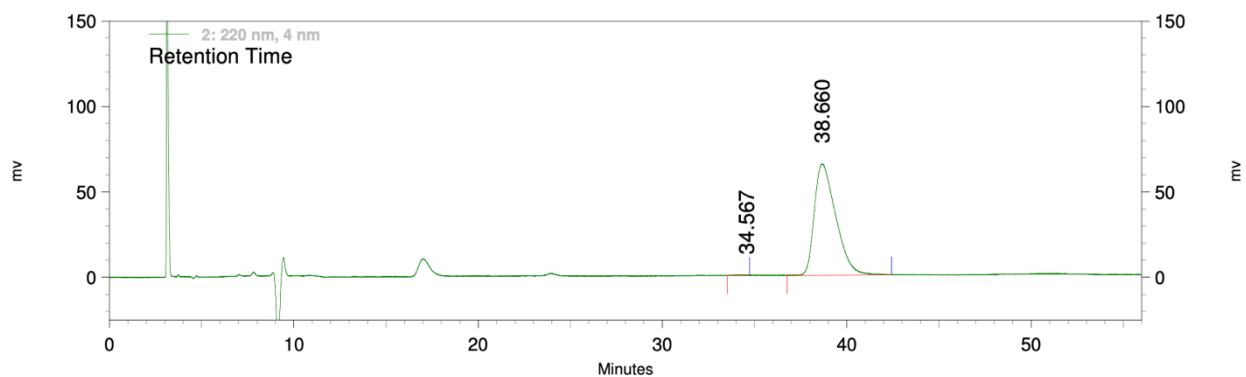

| Retention Time | Area    | Area % | Height | Height % |
|----------------|---------|--------|--------|----------|
| 34.567         | 18309   | 0.34   | 479    | 0.73     |
| 38.660         | 5301866 | 99.66  | 65243  | 99.27    |

|        |         |        |       |        |
|--------|---------|--------|-------|--------|
| Totals | 5320175 | 100.00 | 65722 | 100.00 |
|--------|---------|--------|-------|--------|

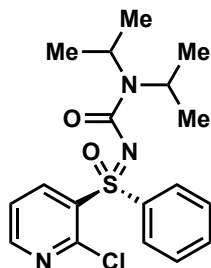

**Column:** Daicel Chiralpak IC; **Solvent:** *n*-hexane/IPA (70:30); **flowrate:** 1 mL/min  
**Chromatogram for sulfoximine: (rac)-7h**

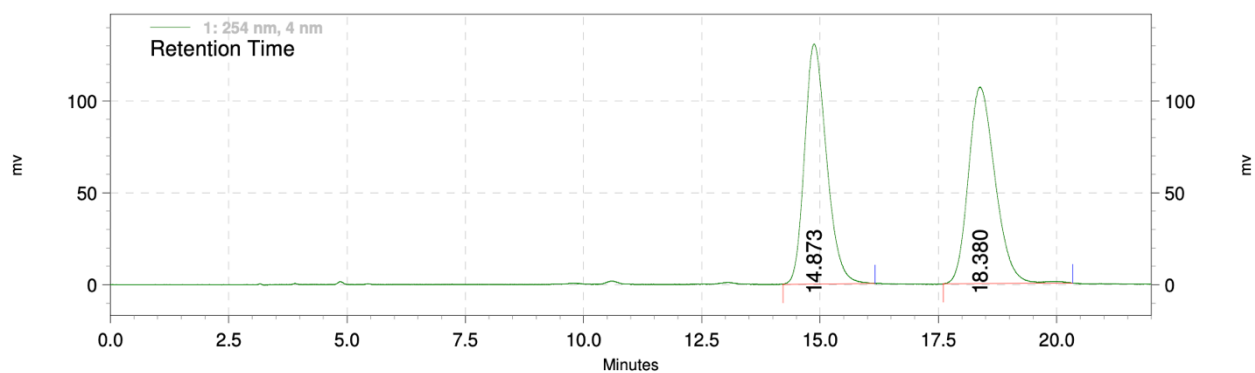

| Retention Time | Area    | Area % | Height | Height % |
|----------------|---------|--------|--------|----------|
| 14.873         | 4227168 | 50.05  | 130663 | 54.98    |
| 18.380         | 4218514 | 49.95  | 107006 | 45.02    |

|        |         |        |        |        |
|--------|---------|--------|--------|--------|
| Totals | 8445682 | 100.00 | 237669 | 100.00 |
|--------|---------|--------|--------|--------|

**Chromatogram for sulfoximine: (R)-7h**

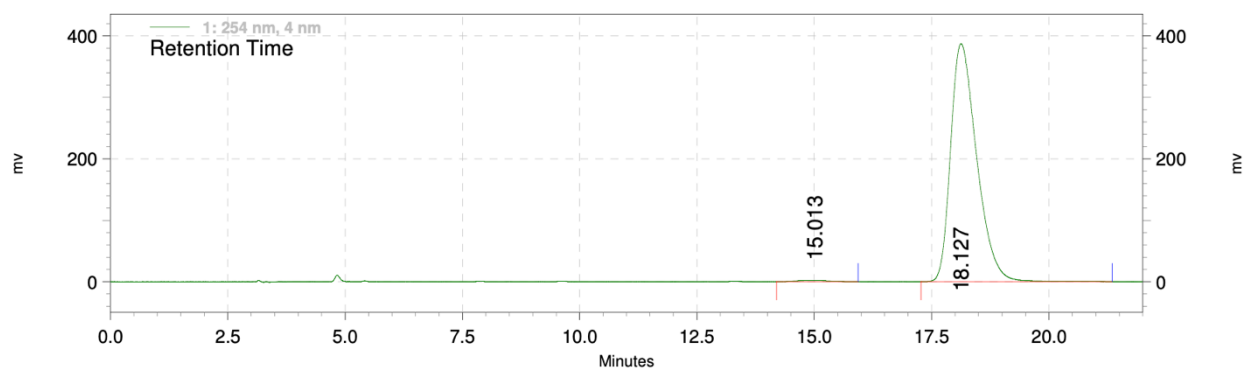

| Retention Time | Area     | Area % | Height | Height % |
|----------------|----------|--------|--------|----------|
| 15.013         | 102107   | 0.68   | 2282   | 0.59     |
| 18.127         | 14908071 | 99.32  | 386986 | 99.41    |

|        |          |        |        |        |
|--------|----------|--------|--------|--------|
| Totals | 15010178 | 100.00 | 389268 | 100.00 |
|--------|----------|--------|--------|--------|

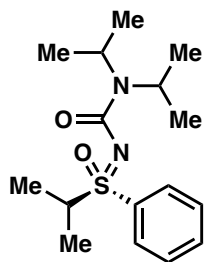

**Column:** Daicel Chiralpak IC; **Solvent:** *n*-hexane/IPA (70:30); **flowrate:** 1 mL/min  
**Chromatogram for sulfoximine: (*rac*)-7i**

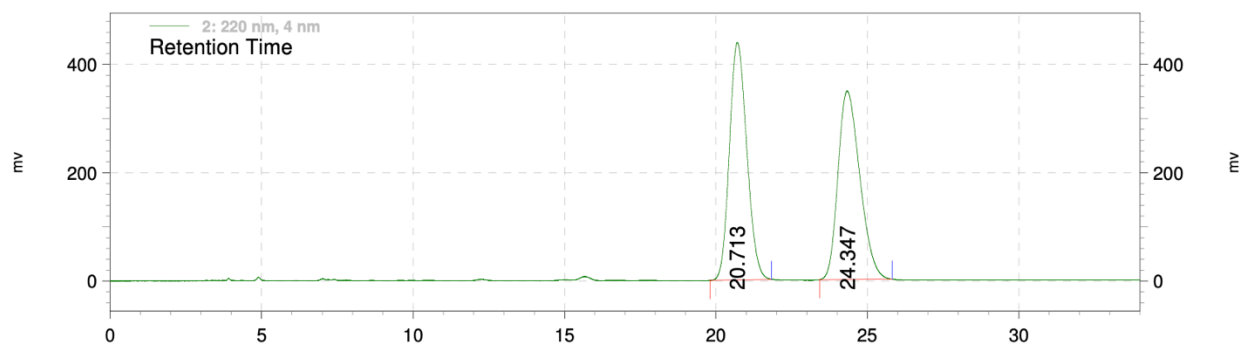

| Retention Time | Area     | Area % | Height | Height % |
|----------------|----------|--------|--------|----------|
| 20.713         | 17541654 | 50.06  | 438687 | 55.75    |
| 24.347         | 17496114 | 49.94  | 348192 | 44.25    |

|        |          |        |        |        |
|--------|----------|--------|--------|--------|
| Totals | 35037768 | 100.00 | 786879 | 100.00 |
|--------|----------|--------|--------|--------|

**Chromatogram for sulfoximine: (*S*)-7i**

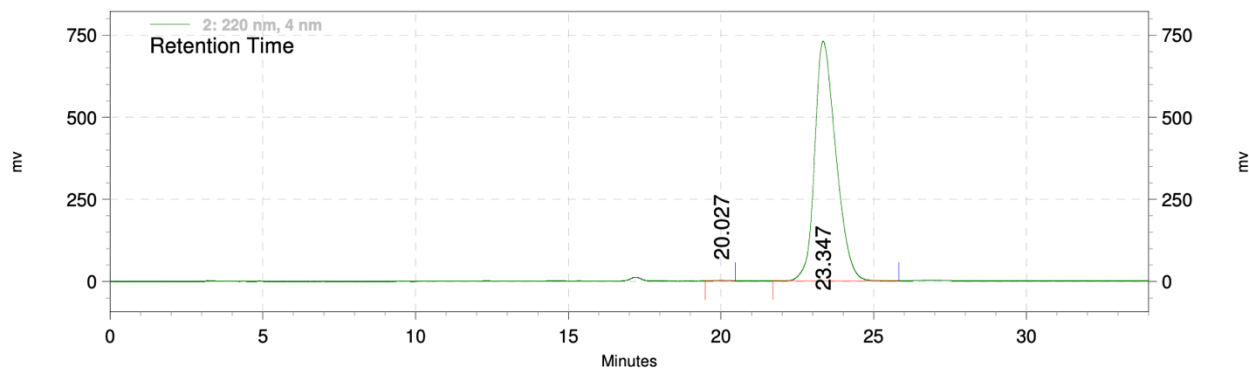

| Retention Time | Area     | Area % | Height | Height % |
|----------------|----------|--------|--------|----------|
| 20.027         | 53568    | 0.15   | 1760   | 0.24     |
| 23.347         | 35183762 | 99.85  | 729960 | 99.76    |

|        |          |        |        |        |
|--------|----------|--------|--------|--------|
| Totals | 35237330 | 100.00 | 731720 | 100.00 |
|--------|----------|--------|--------|--------|

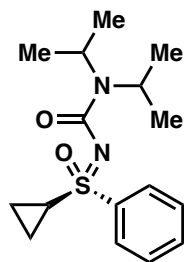

**Column:** Daicel Chiralpak IC; **Solvent:** *n*-hexane/IPA (70:30); **flowrate:** 1 mL/min  
**Chromatogram for sulfoximine: (rac)-7j**

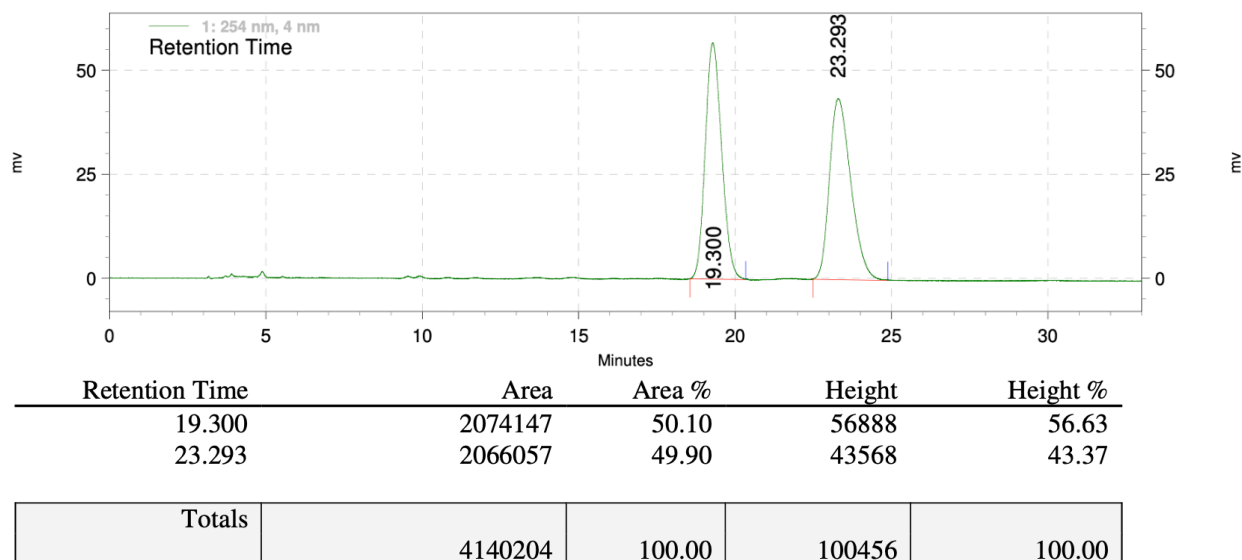

**Chromatogram for sulfoximine: (S)-7j**

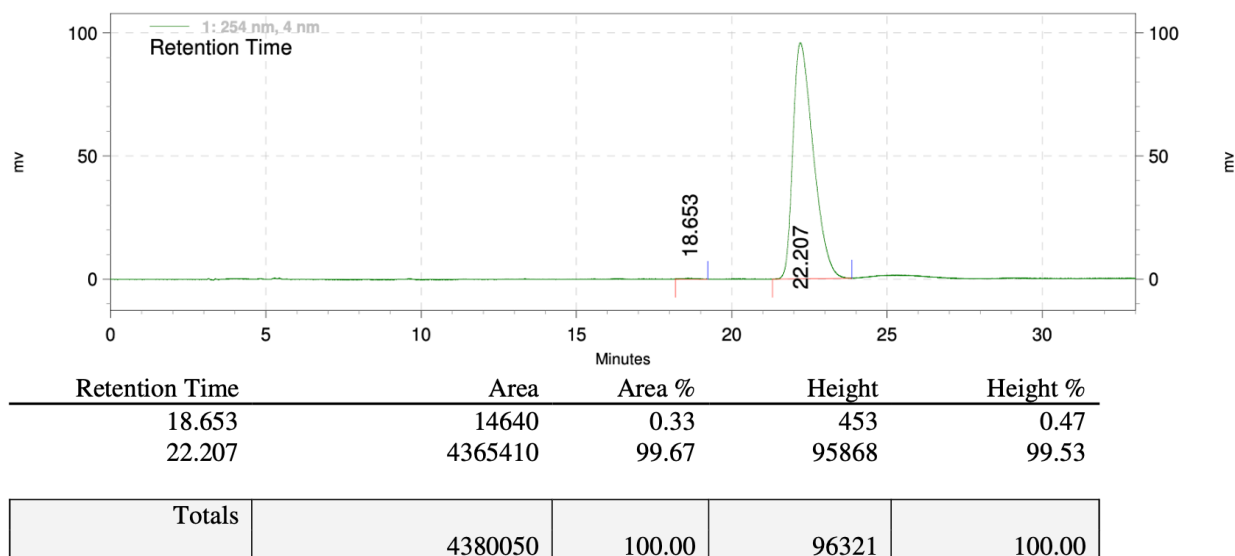

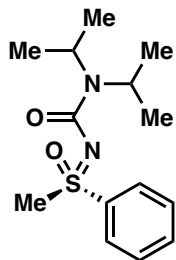

**Column:** Daicel Chiralpak IC; **Solvent:** *n*-hexane/IPA (70:30); **flowrate:** 1 mL/min  
**Chromatogram for sulfoximine: (rac)-7k**

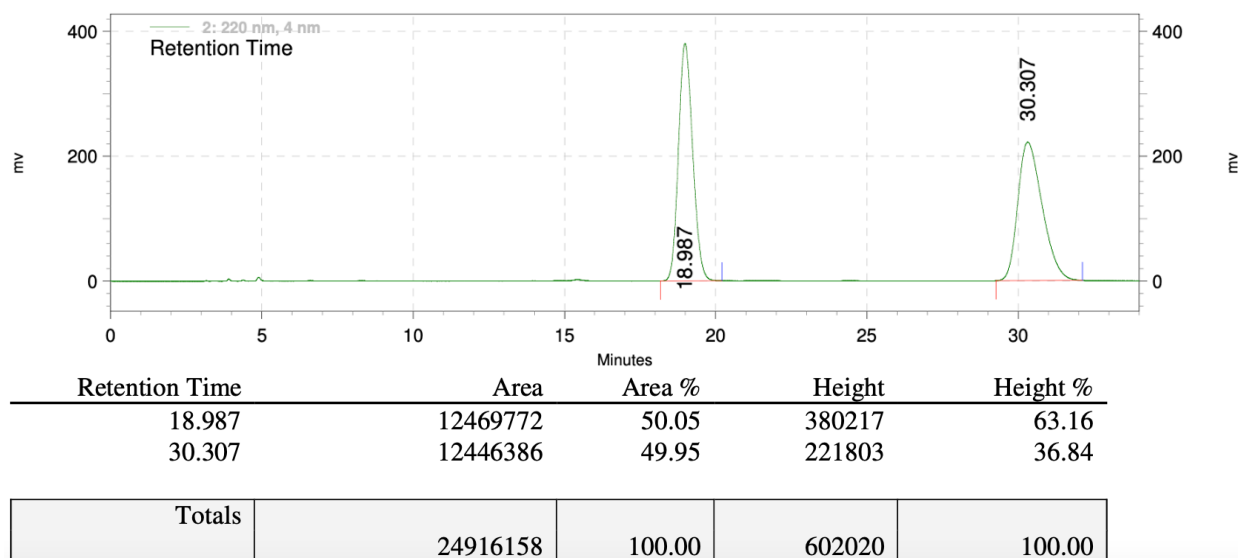

**Chromatogram for sulfoximine: (S)-7k**

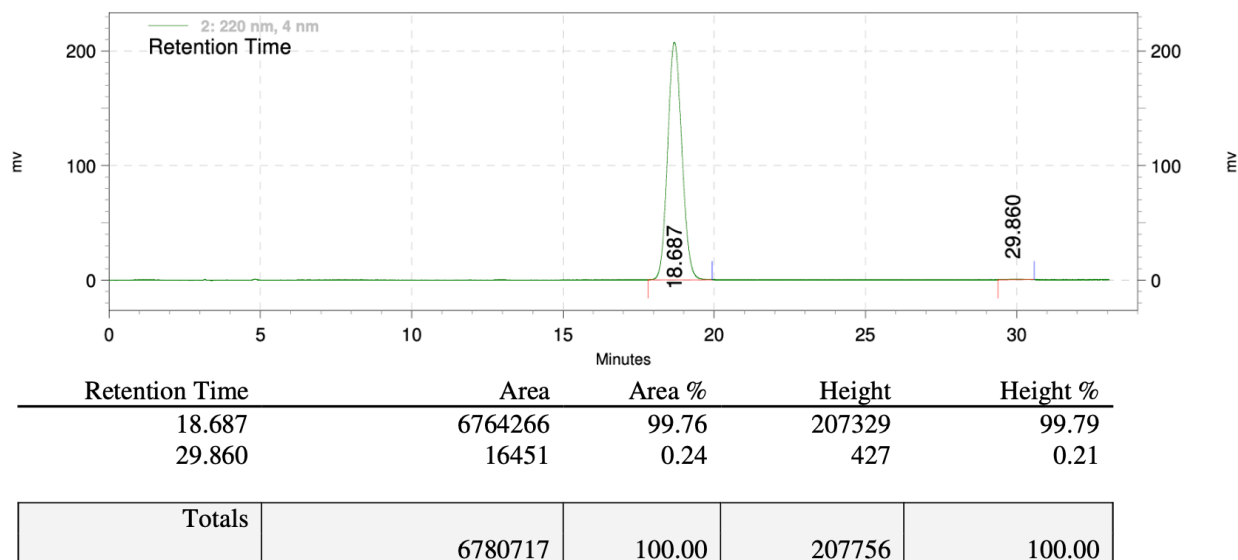

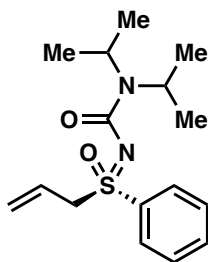

**Column:** Daicel Chiralpak IC; **Solvent:** *n*-hexane/IPA (70:30); **flowrate:** 1 mL/min  
**Chromatogram for sulfoximine: (rac)-7I**

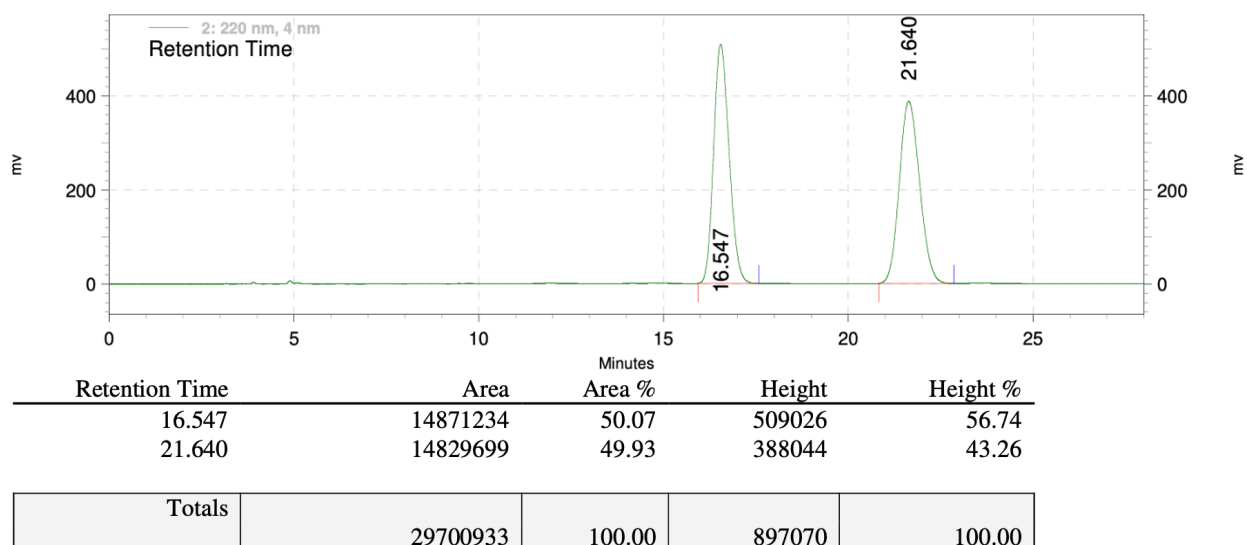

**Chromatogram for sulfoximine: (S)-7I**

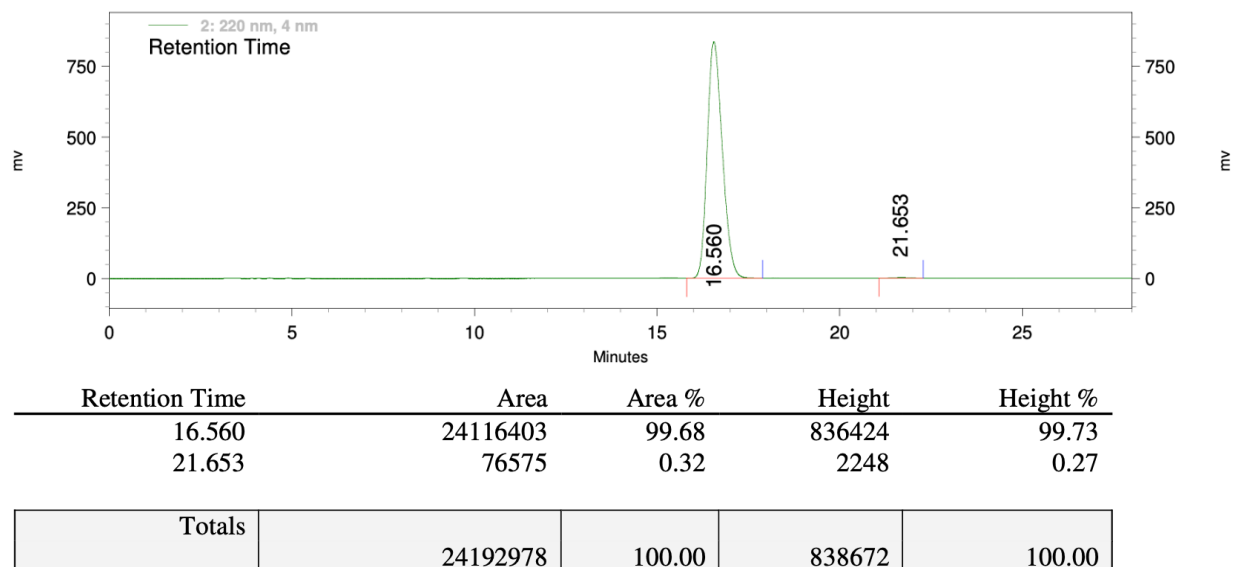

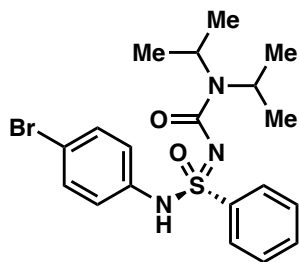

**Column:** Daicel Chiralpak IC; **Solvent:** *n*-hexane/IPA (70:30); **flowrate:** 1 mL/min  
**Chromatogram for sulfonimide: (rac)-8a**

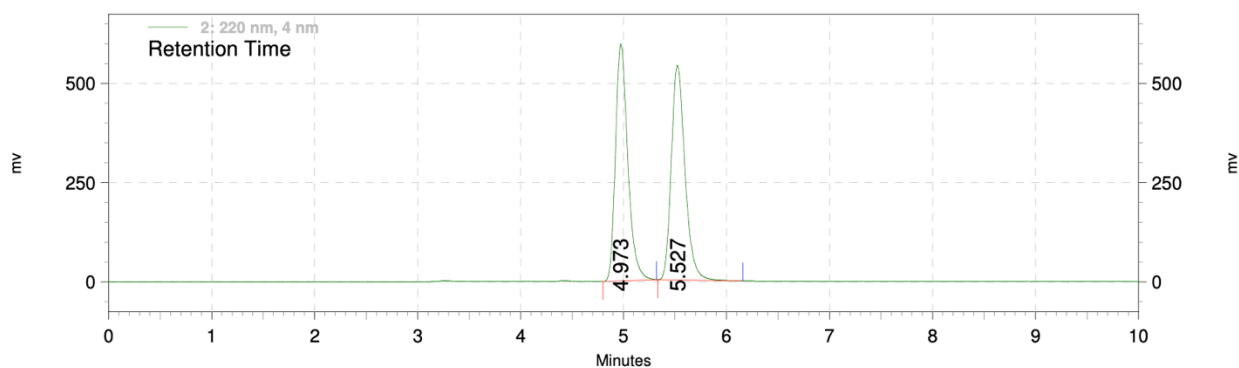

| Retention Time | Area    | Area % | Height | Height % |
|----------------|---------|--------|--------|----------|
| 4.973          | 4964145 | 49.88  | 597920 | 52.52    |
| 5.527          | 4987388 | 50.12  | 540490 | 47.48    |

|        |         |        |         |        |
|--------|---------|--------|---------|--------|
| Totals | 9951533 | 100.00 | 1138410 | 100.00 |
|--------|---------|--------|---------|--------|

**Chromatogram for sulfonimide: (S)-8a**

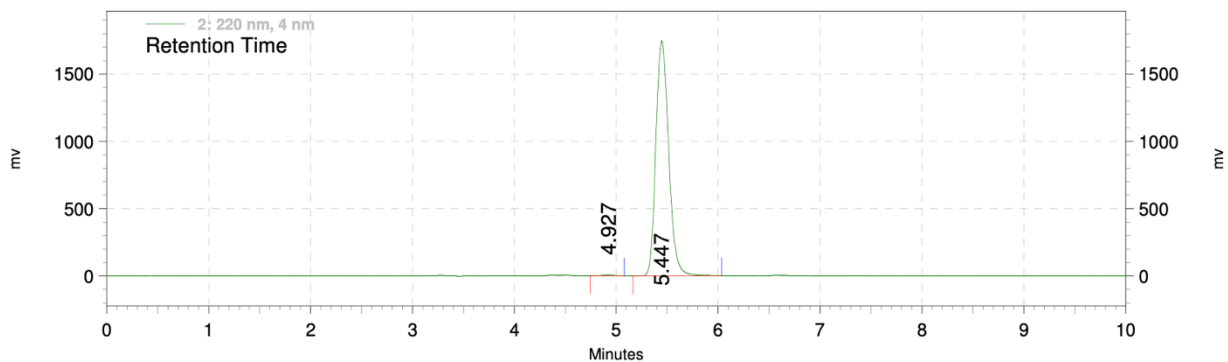

| Retention Time | Area     | Area % | Height  | Height % |
|----------------|----------|--------|---------|----------|
| 4.927          | 33745    | 0.22   | 4358    | 0.25     |
| 5.447          | 15227332 | 99.78  | 1747832 | 99.75    |

|        |          |        |         |        |
|--------|----------|--------|---------|--------|
| Totals | 15261077 | 100.00 | 1752190 | 100.00 |
|--------|----------|--------|---------|--------|

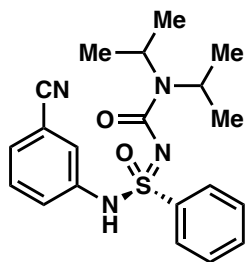

**Column:** Daicel Chiralpak IC; **Solvent:** *n*-hexane/IPA (70:30); **flowrate:** 1 mL/min  
**Chromatogram for sulfonimide: (rac)-8b**

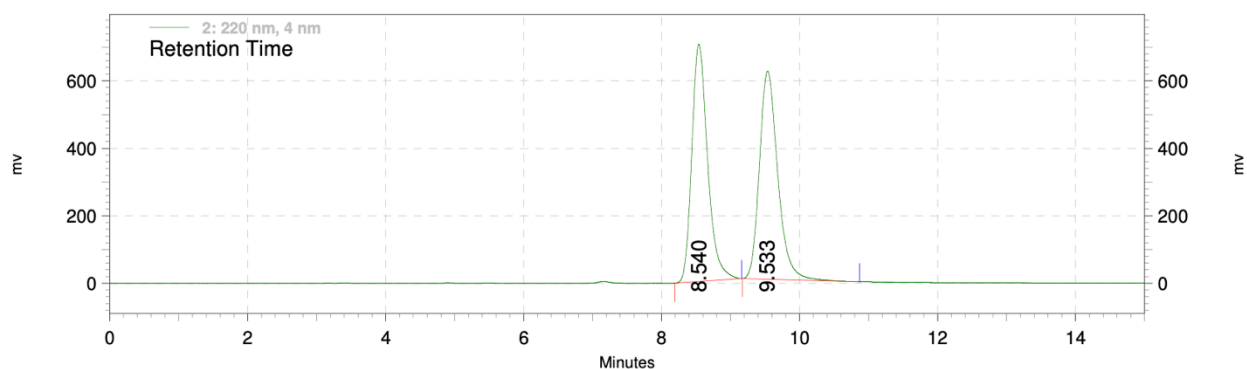

| Retention Time | Area     | Area % | Height | Height % |
|----------------|----------|--------|--------|----------|
| 8.540          | 11207687 | 49.63  | 703908 | 53.29    |
| 9.533          | 11375507 | 50.37  | 616925 | 46.71    |

|        |          |        |         |        |
|--------|----------|--------|---------|--------|
| Totals | 22583194 | 100.00 | 1320833 | 100.00 |
|--------|----------|--------|---------|--------|

**Chromatogram for sulfonimide: (S)-8b**

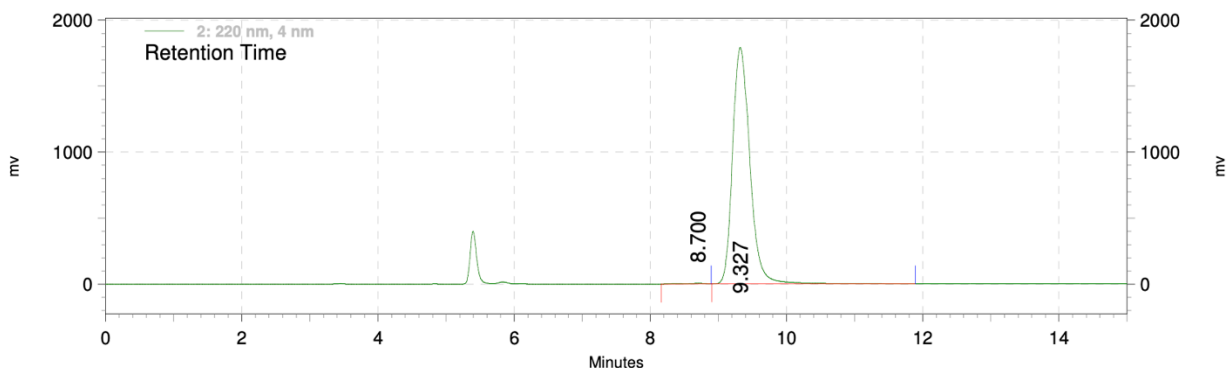

| Retention Time | Area     | Area % | Height  | Height % |
|----------------|----------|--------|---------|----------|
| 8.700          | 110363   | 0.35   | 5306    | 0.30     |
| 9.327          | 31717838 | 99.65  | 1790868 | 99.70    |

|        |          |        |         |        |
|--------|----------|--------|---------|--------|
| Totals | 31828201 | 100.00 | 1796174 | 100.00 |
|--------|----------|--------|---------|--------|

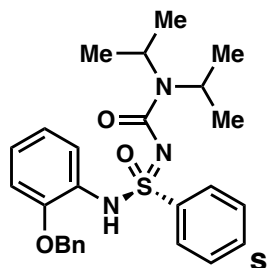

**Column:** Daicel Chiralpak IC; **Solvent:** *n*-hexane/IPA (70:30); **flowrate:** 1 mL/min  
**Chromatogram for sulfonimide: (rac)-8c**

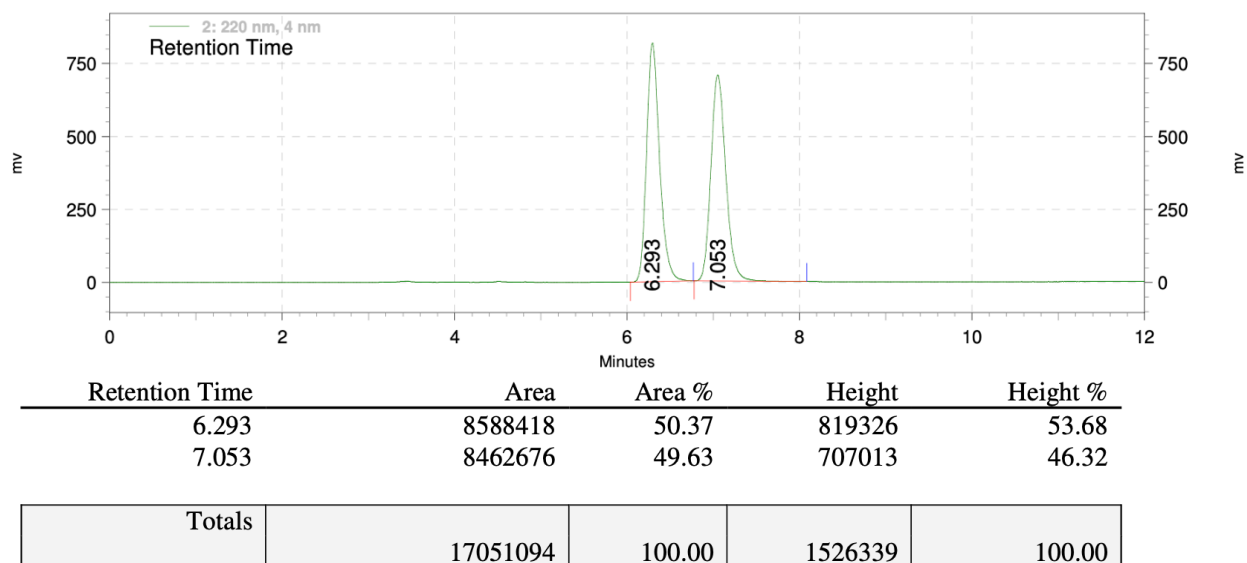

**Chromatogram for sulfonimide: (S)-8c**

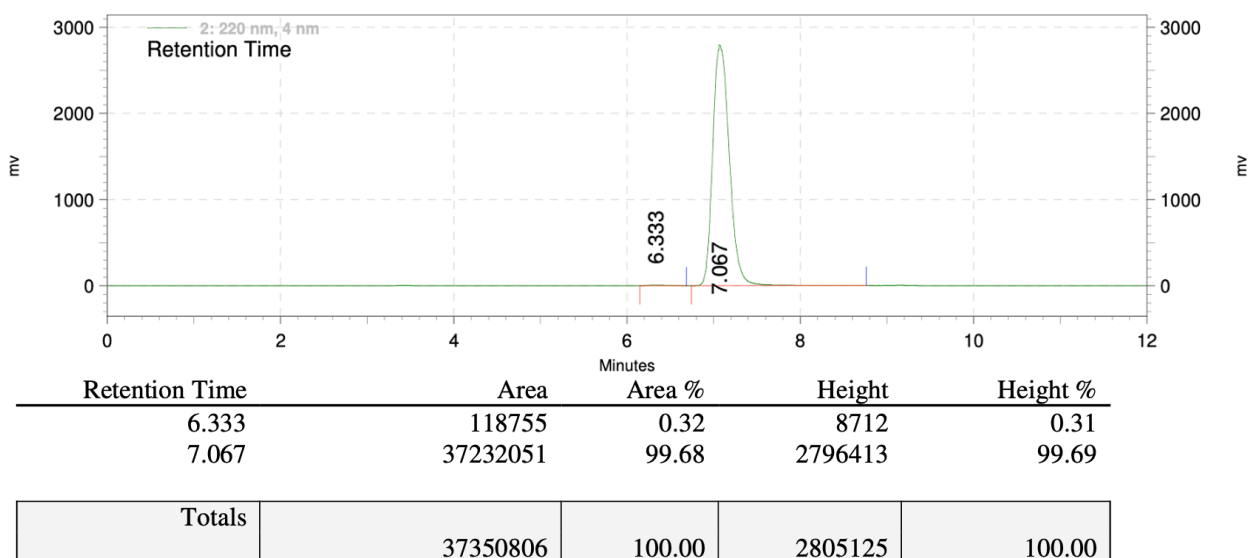

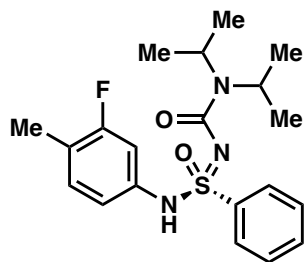

**Column:** Daicel Chiralpak IC; **Solvent:** *n*-hexane/IPA (70:30); **flowrate:** 1 mL/min  
**Chromatogram for sulfonimide: (rac)-8d**

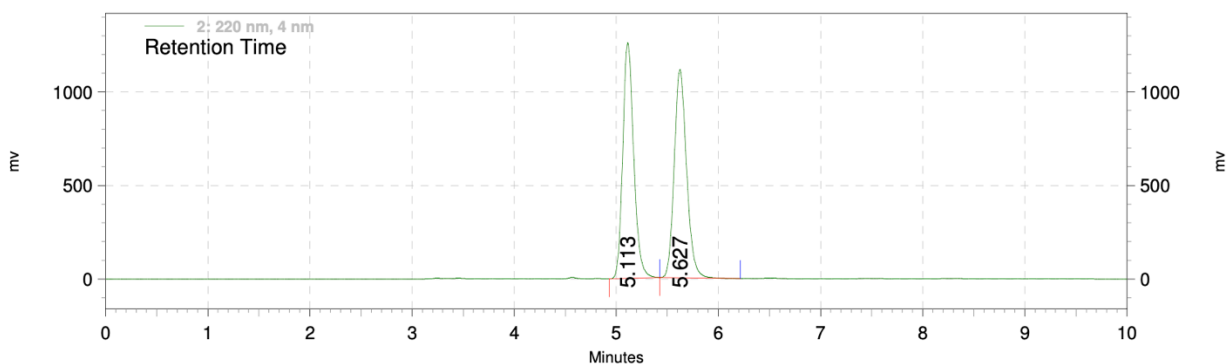

| Retention Time | Area    | Area % | Height  | Height % |
|----------------|---------|--------|---------|----------|
| 5.113          | 9374025 | 50.00  | 1259655 | 53.12    |
| 5.627          | 9372388 | 50.00  | 1111672 | 46.88    |

|        |          |        |         |        |
|--------|----------|--------|---------|--------|
| Totals | 18746413 | 100.00 | 2371327 | 100.00 |
|--------|----------|--------|---------|--------|

**Chromatogram for sulfonimide: (S)-8d**

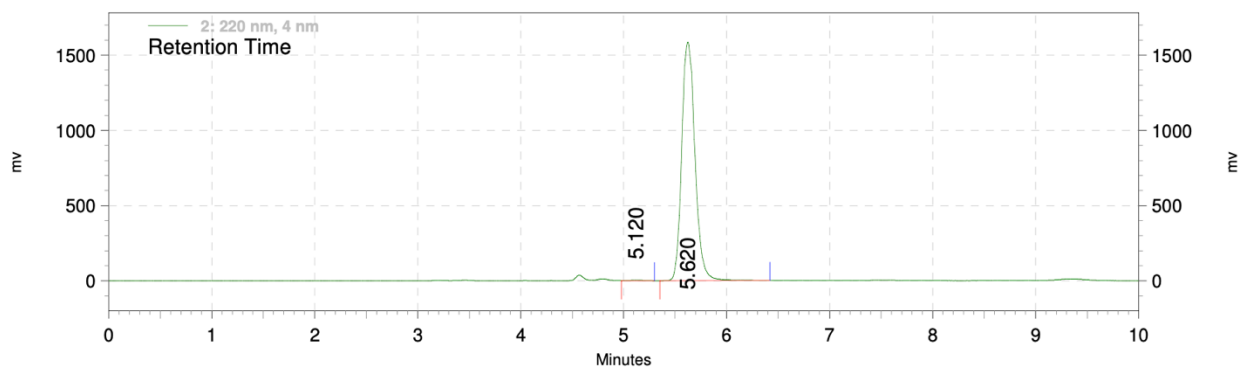

| Retention Time | Area     | Area % | Height  | Height % |
|----------------|----------|--------|---------|----------|
| 5.120          | 28649    | 0.20   | 3773    | 0.24     |
| 5.620          | 14177995 | 99.80  | 1584519 | 99.76    |

|        |          |        |         |        |
|--------|----------|--------|---------|--------|
| Totals | 14206644 | 100.00 | 1588292 | 100.00 |
|--------|----------|--------|---------|--------|

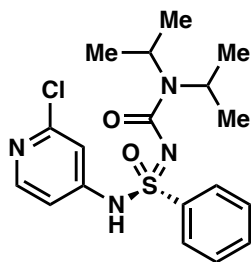

**Column:** Daicel Chiralpak IC; **Solvent:** *n*-hexane/IPA (70:30); **flowrate:** 1 mL/min  
**Chromatogram for sulfonimide: (rac)-8e**

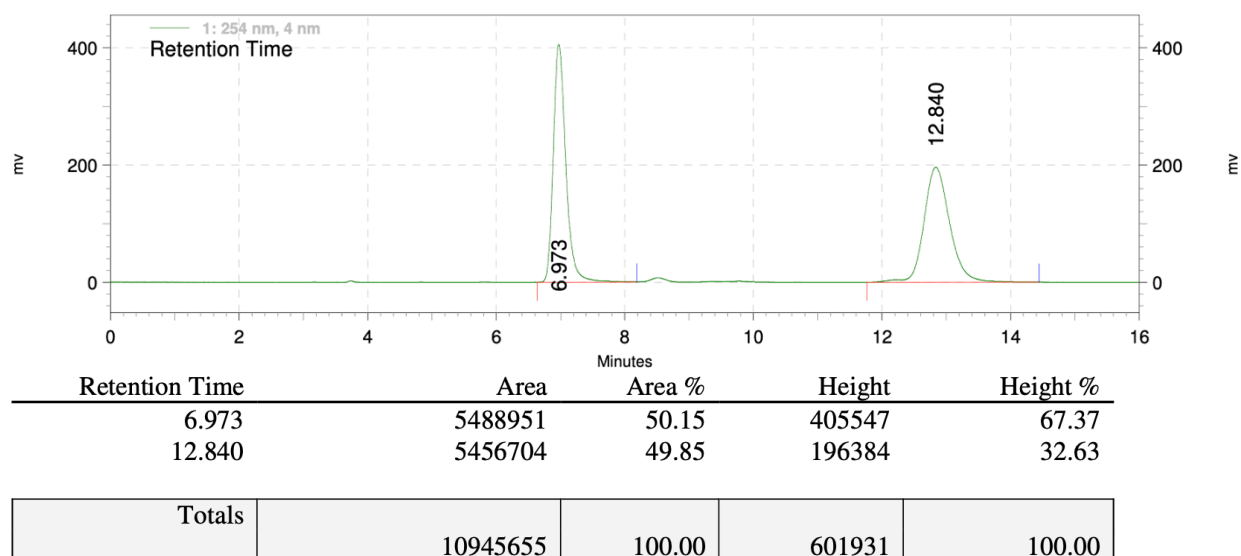

**Chromatogram for sulfonimide: (S)-8e**

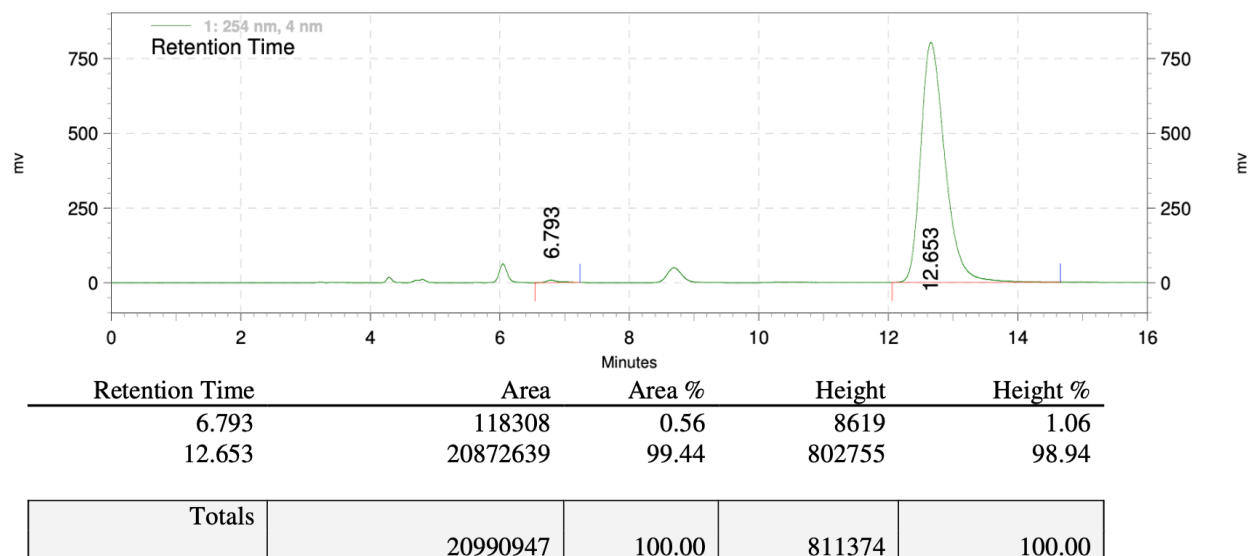

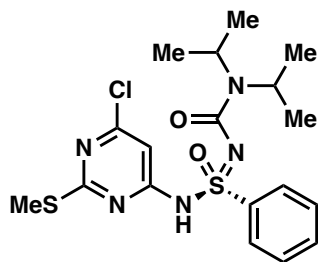

**Column:** Daicel Chiralpak IC; **Solvent:** *n*-hexane/IPA (70:30); **flowrate:** 1 mL/min  
**Chromatogram for sulfonimidamide: (rac)-8f**

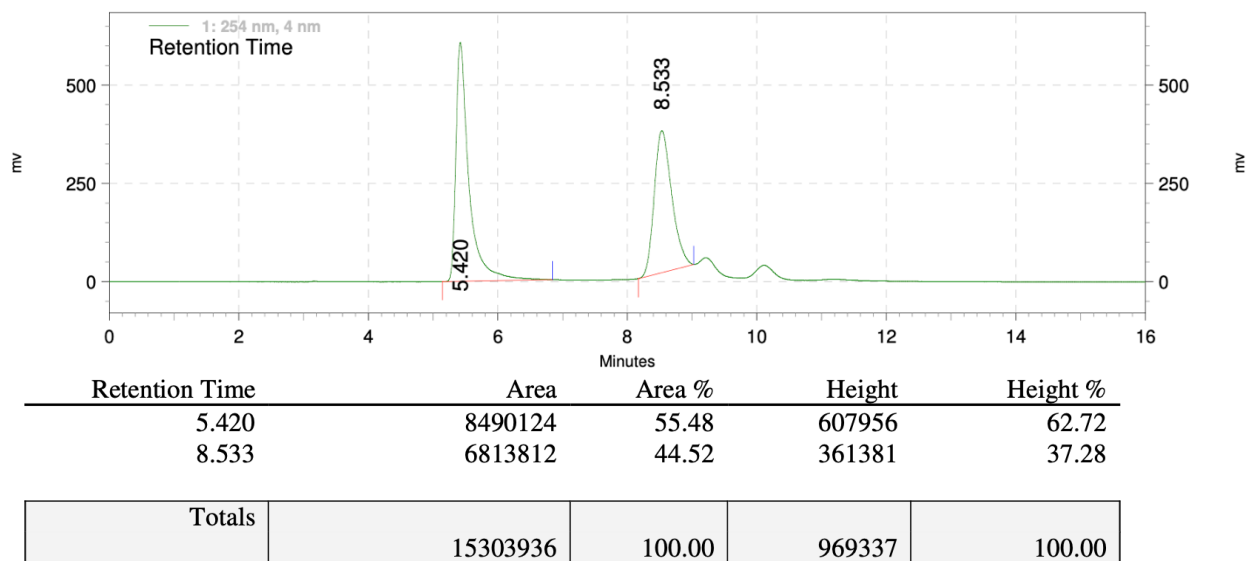

**Chromatogram for sulfonimidamide: (S)-8f**

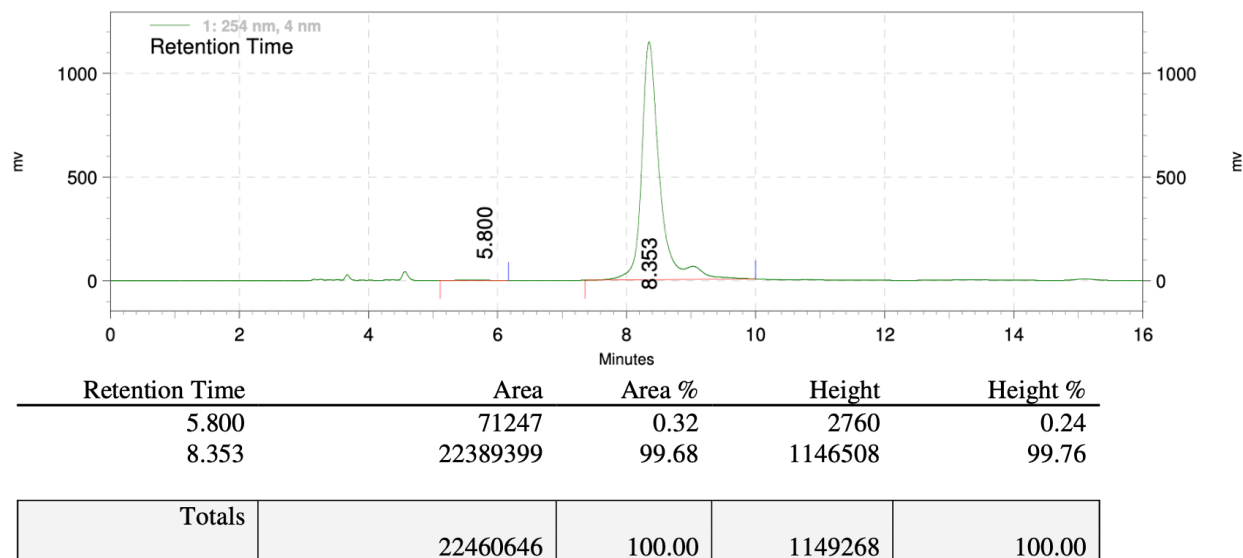

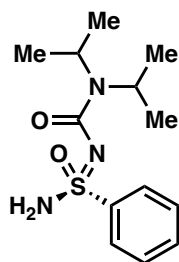

**Column:** Daicel Chiralpak IC; **Solvent:** *n*-hexane/IPA (70:30); **flowrate:** 1 mL/min  
**Chromatogram for sulfonimide: (rac)-8i**

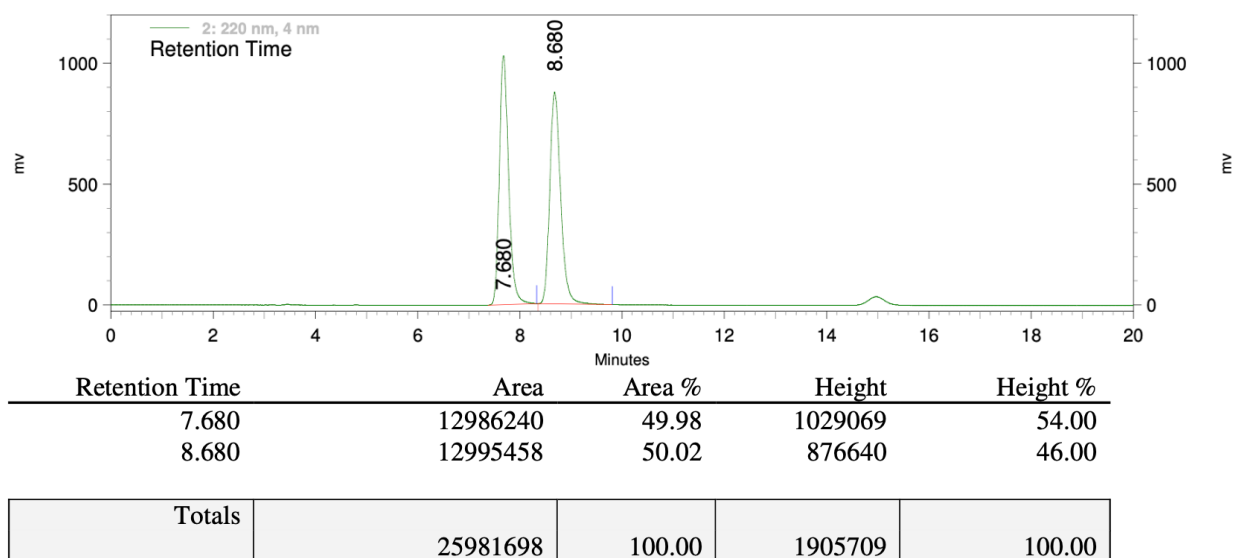

**Chromatogram for sulfonimide: (R)-8i**

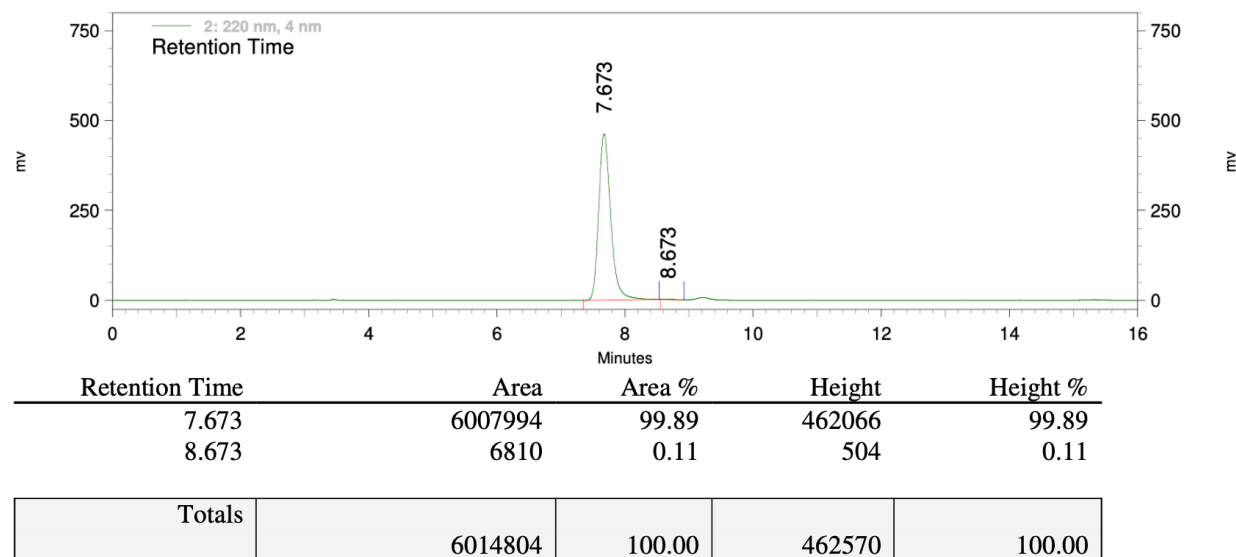

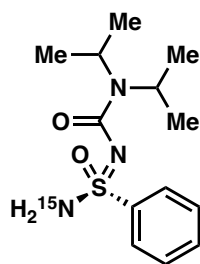

Chromatogram for sulfonimidamide: (R)-8j

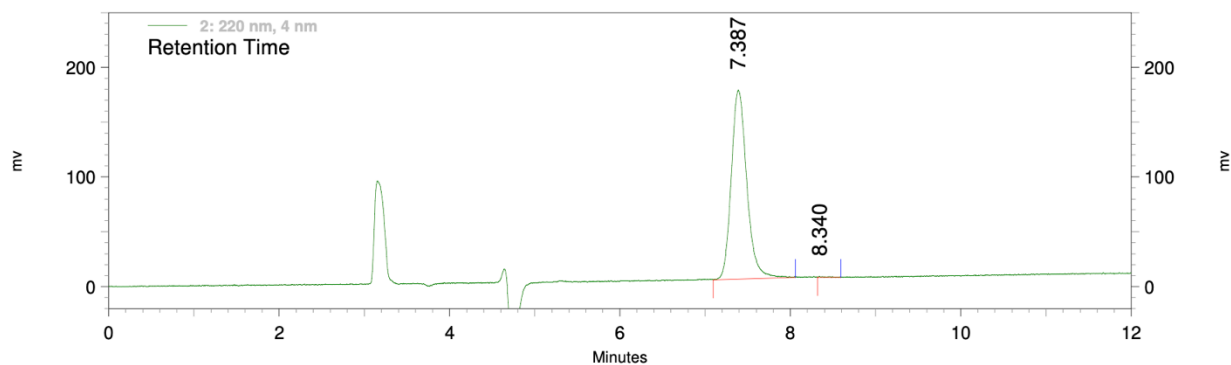

| Retention Time | Area    | Area % | Height | Height % |
|----------------|---------|--------|--------|----------|
| 7.387          | 2184352 | 99.66  | 172448 | 99.47    |
| 8.340          | 7491    | 0.34   | 917    | 0.53     |
| Totals         | 2191843 | 100.00 | 173365 | 100.00   |

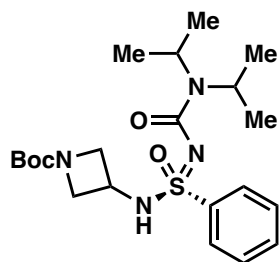

**Column:** Daicel Chiralpak IC; **Solvent:** *n*-hexane/IPA (70:30); **flowrate:** 1 mL/min  
**Chromatogram for sulfonimide: (rac)-8k**

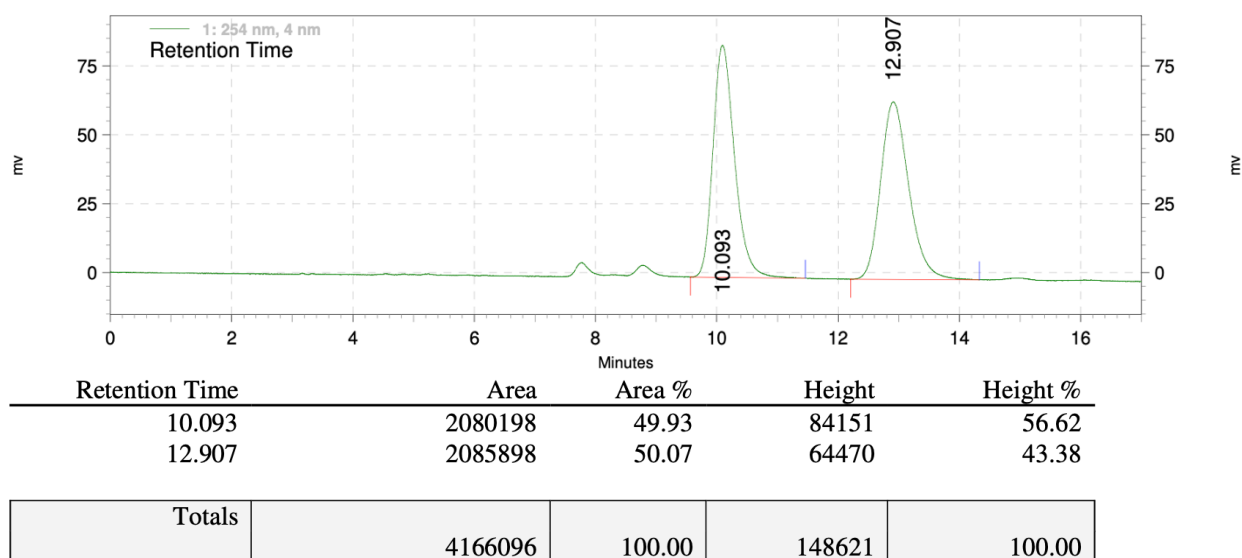

**Chromatogram for sulfonimide: (S)-8k**

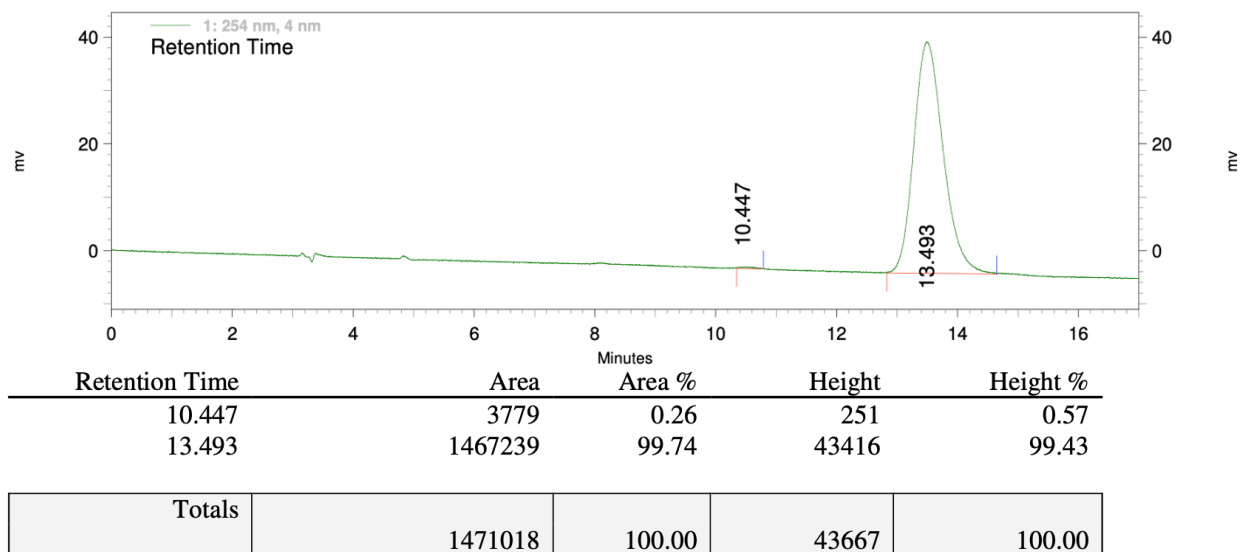

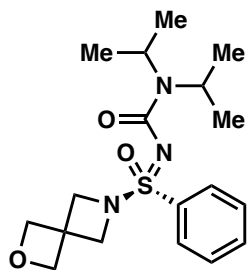

**Column:** Daicel Chiralpak IC; **Solvent:** *n*-hexane/IPA (70:30); **flowrate:** 1 mL/min  
**Chromatogram for sulfonimide: (rac)-8n**

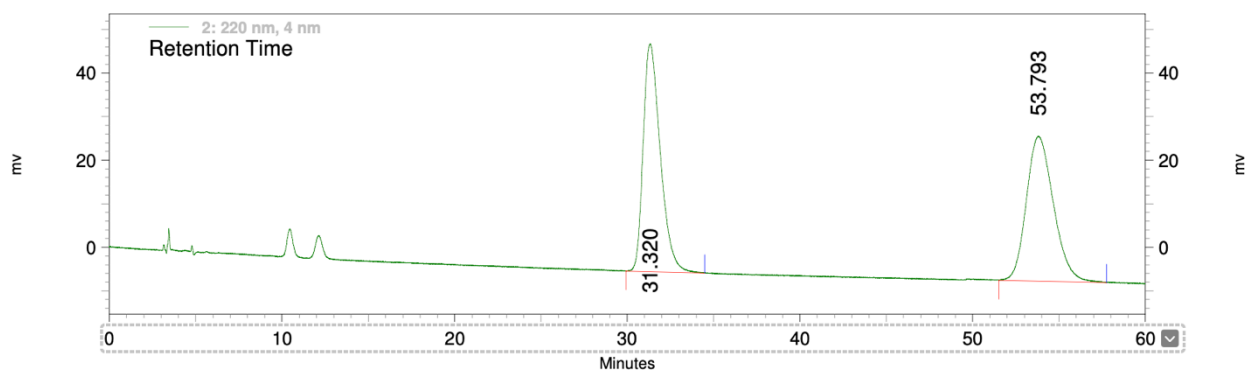

| Retention Time | Area    | Area % | Height | Height % |
|----------------|---------|--------|--------|----------|
| 31.320         | 3614010 | 49.81  | 52388  | 61.15    |
| 53.793         | 3640876 | 50.19  | 33280  | 38.85    |

|        |         |        |       |        |
|--------|---------|--------|-------|--------|
| Totals | 7254886 | 100.00 | 85668 | 100.00 |
|--------|---------|--------|-------|--------|

**Chromatogram for sulfonimide: (S)-8n**

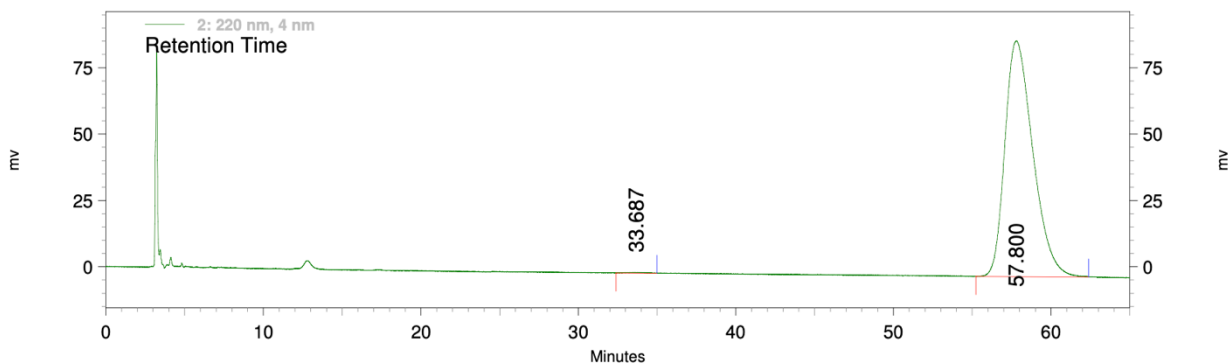

| Retention Time | Area     | Area % | Height | Height % |
|----------------|----------|--------|--------|----------|
| 33.687         | 25045    | 0.23   | 318    | 0.36     |
| 57.800         | 10995279 | 99.77  | 88904  | 99.64    |

|        |          |        |       |        |
|--------|----------|--------|-------|--------|
| Totals | 11020324 | 100.00 | 89222 | 100.00 |
|--------|----------|--------|-------|--------|

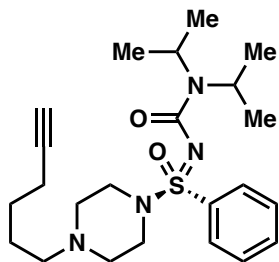

**Column:** Daicel Chiralpak IA; **Solvent:** *n*-hexane/IPA/Et<sub>2</sub>NH (90:10:0.1%); **flowrate:** 1 mL/min

### Chromatogram for sulfonimidamide: (rac)-8p

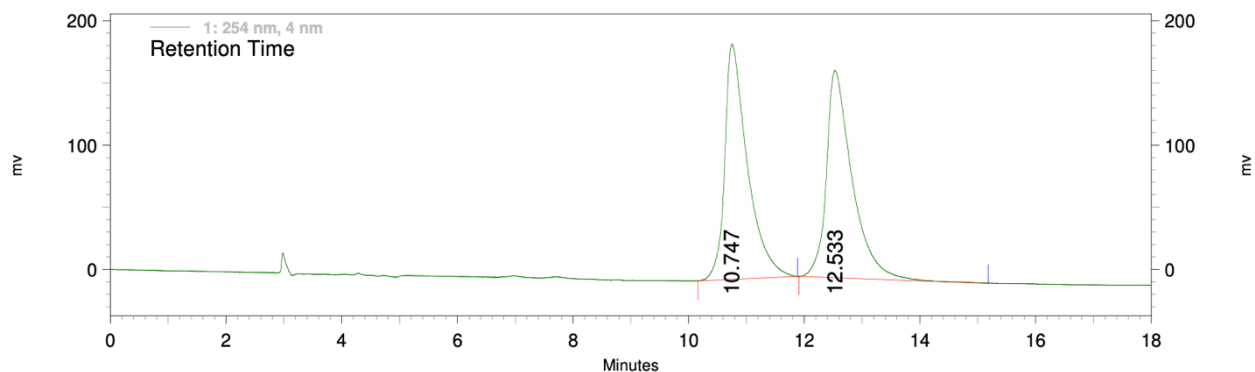

| Retention Time | Area    | Area % | Height | Height % |
|----------------|---------|--------|--------|----------|
| 10.747         | 5152443 | 49.89  | 189200 | 53.18    |
| 12.533         | 5175277 | 50.11  | 166592 | 46.82    |

|        |          |        |        |        |
|--------|----------|--------|--------|--------|
| Totals | 10327720 | 100.00 | 355792 | 100.00 |
|--------|----------|--------|--------|--------|

### Chromatogram for sulfonimidamide: (S)-8p

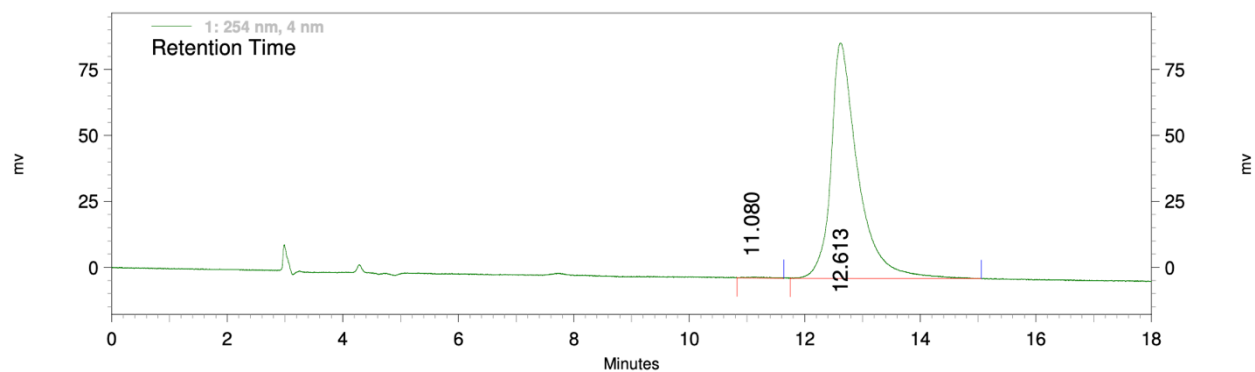

| Retention Time | Area    | Area % | Height | Height % |
|----------------|---------|--------|--------|----------|
| 11.080         | 8848    | 0.30   | 356    | 0.40     |
| 12.613         | 2897547 | 99.70  | 89313  | 99.60    |

|        |         |        |       |        |
|--------|---------|--------|-------|--------|
| Totals | 2906395 | 100.00 | 89669 | 100.00 |
|--------|---------|--------|-------|--------|

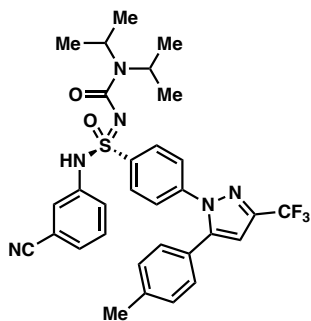

**Column:** Daicel Chiralpak IA; **Solvent:** *n*-hexane/IPA (90:10); **flowrate:** 1 mL/min  
**Chromatogram for sulfonimide: (rac)-8r**

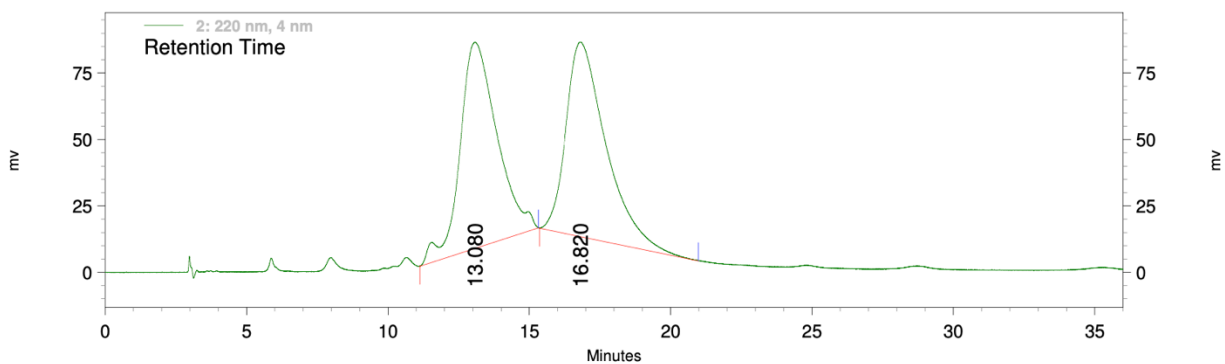

| Retention Time | Area     | Area % | Height | Height % |
|----------------|----------|--------|--------|----------|
| 13.080         | 7067407  | 49.43  | 77665  | 51.47    |
| 16.820         | 7229537  | 50.57  | 73219  | 48.53    |
| Totals         | 14296944 | 100.00 | 150884 | 100.00   |

**Chromatogram for sulfonimide: (S)-8r**

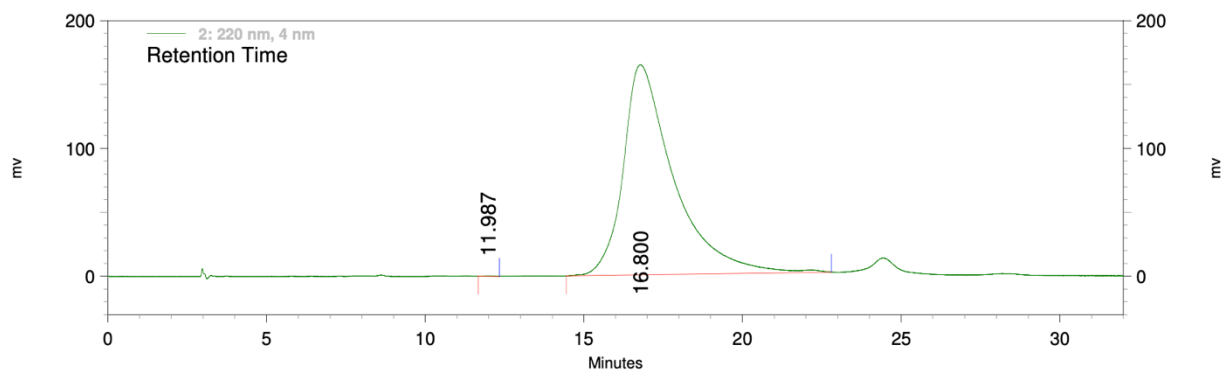

| Retention Time | Area     | Area % | Height | Height % |
|----------------|----------|--------|--------|----------|
| 11.987         | 8688     | 0.05   | 416    | 0.25     |
| 16.800         | 18256017 | 99.95  | 164392 | 99.75    |
| Totals         | 18264705 | 100.00 | 164808 | 100.00   |

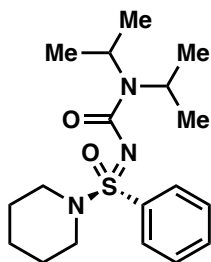

**Column:** Daicel Chiralpak IA; **Solvent:** *n*-hexane/IPA (98:02); **flowrate:** 1 mL/min  
**Chromatogram for sulfonimide: (rac)-8s**

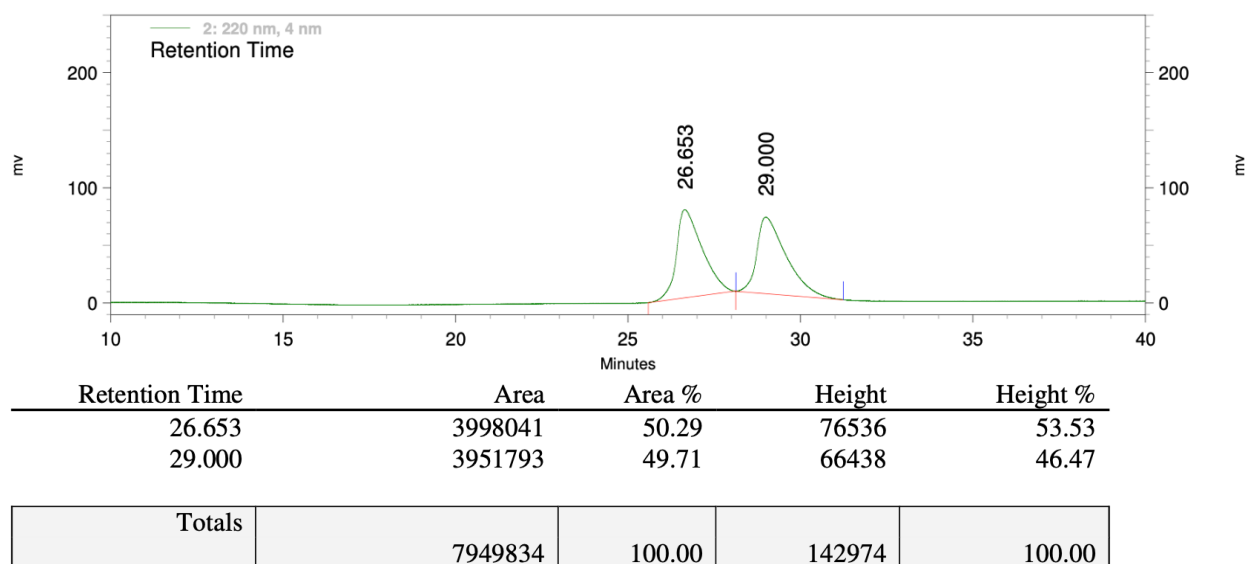

**Chromatogram for sulfonimide: (S)-8s**

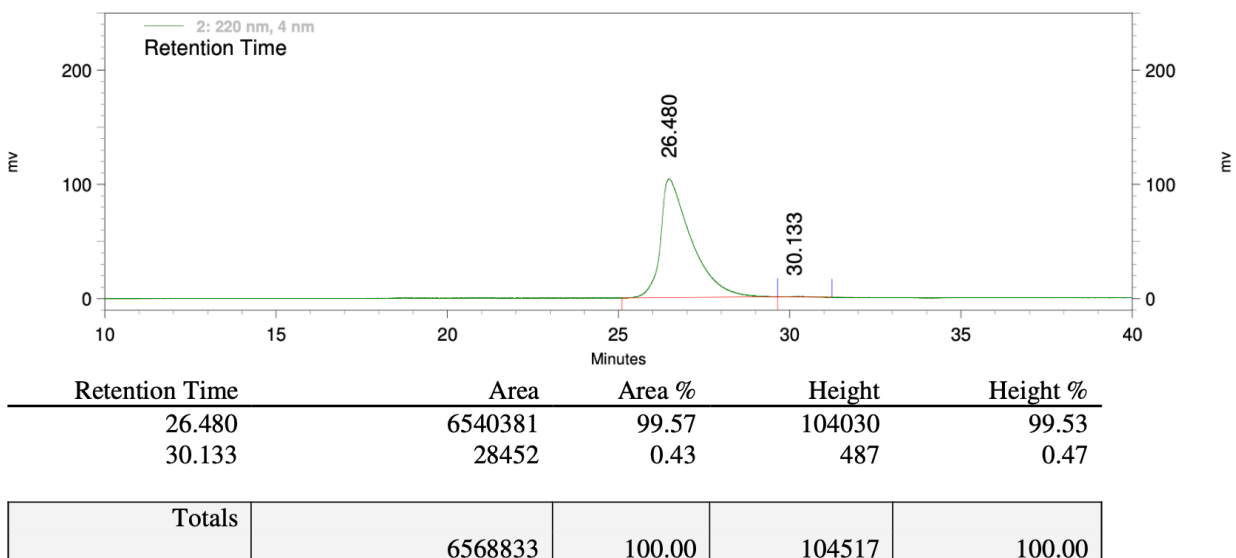

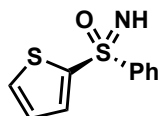

**Column:** Daicel Chiralpak IB; **Solvent:** *n*-hexane/IPA (90:10); **flowrate:** 1 mL/min  
**Chromatogram for sulfoximine: (rac)-9a**

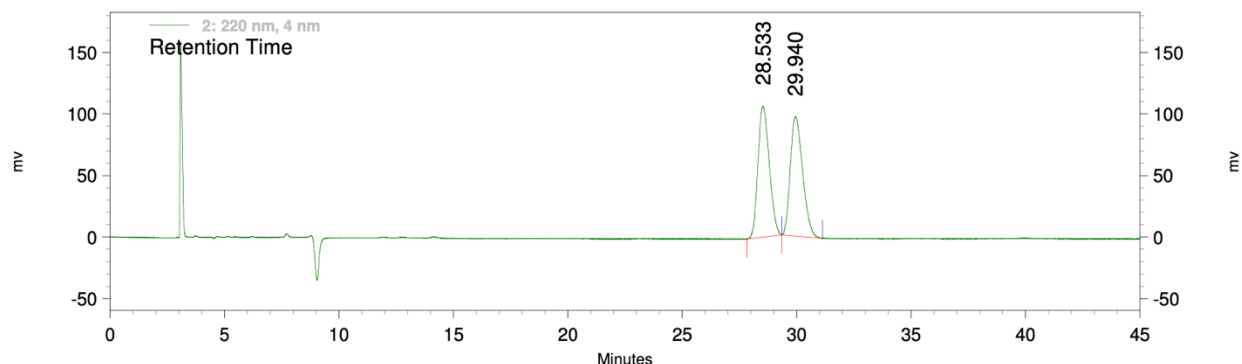

| Retention Time | Area    | Area % | Height | Height % |
|----------------|---------|--------|--------|----------|
| 28.533         | 3662385 | 50.10  | 106586 | 52.35    |
| 29.940         | 3647198 | 49.90  | 97005  | 47.65    |

|        |         |        |        |        |
|--------|---------|--------|--------|--------|
| Totals | 7309583 | 100.00 | 203591 | 100.00 |
|--------|---------|--------|--------|--------|

**Chromatogram for sulfoximine: (R)-9a**

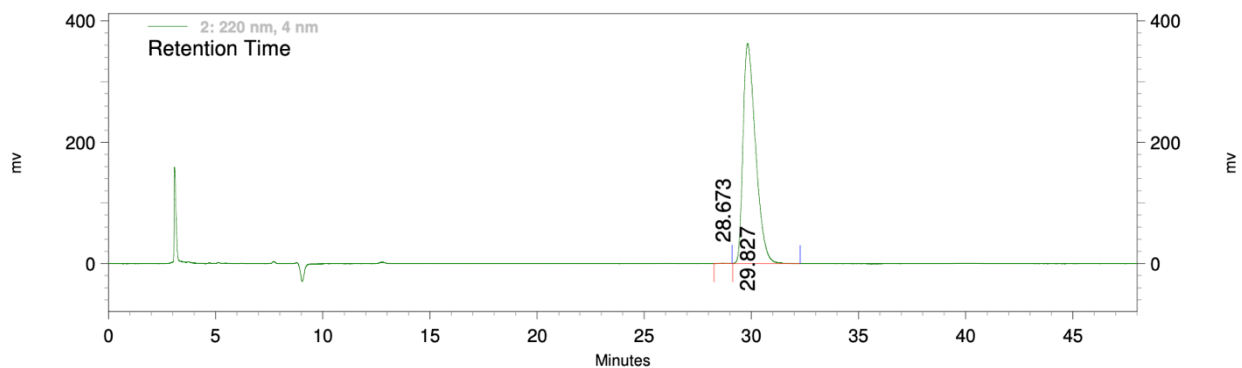

| Retention Time | Area     | Area % | Height | Height % |
|----------------|----------|--------|--------|----------|
| 28.673         | 18267    | 0.12   | 758    | 0.21     |
| 29.827         | 14729473 | 99.88  | 363307 | 99.79    |

|        |          |        |        |        |
|--------|----------|--------|--------|--------|
| Totals | 14747740 | 100.00 | 364065 | 100.00 |
|--------|----------|--------|--------|--------|

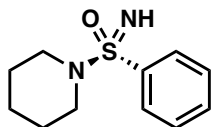

**Column:** Daicel Chiralpak IB; **Solvent:** *n*-hexane/IPA (95:05); **flowrate:** 1 mL/min  
**Chromatogram for sulfonimide: (rac)-9b**

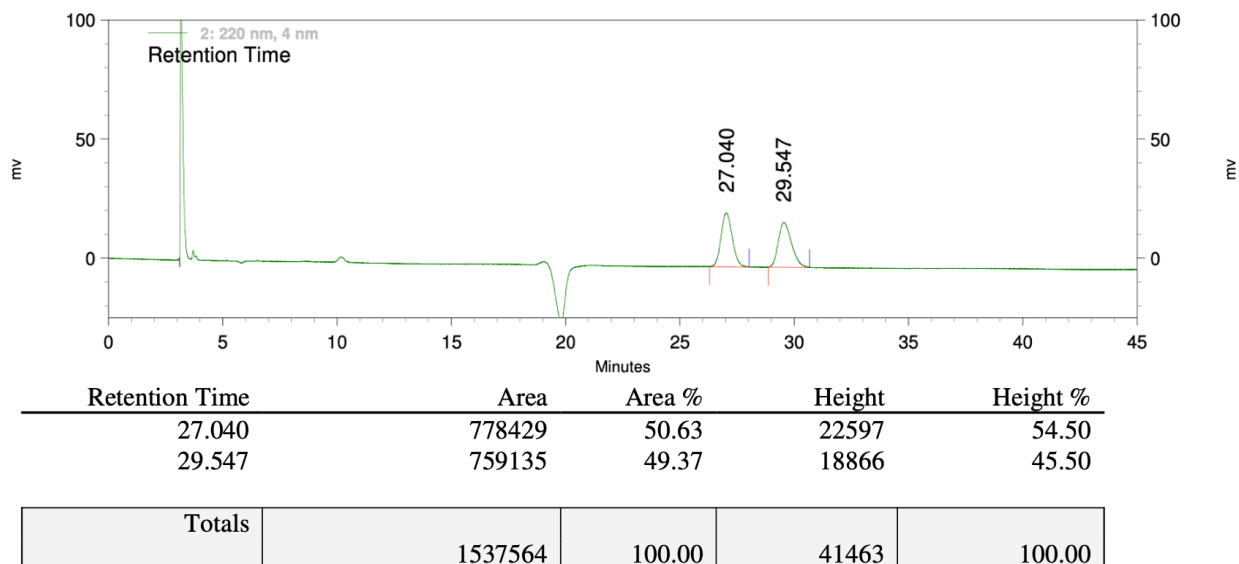

**Chromatogram for sulfonimide: (S)-9b**

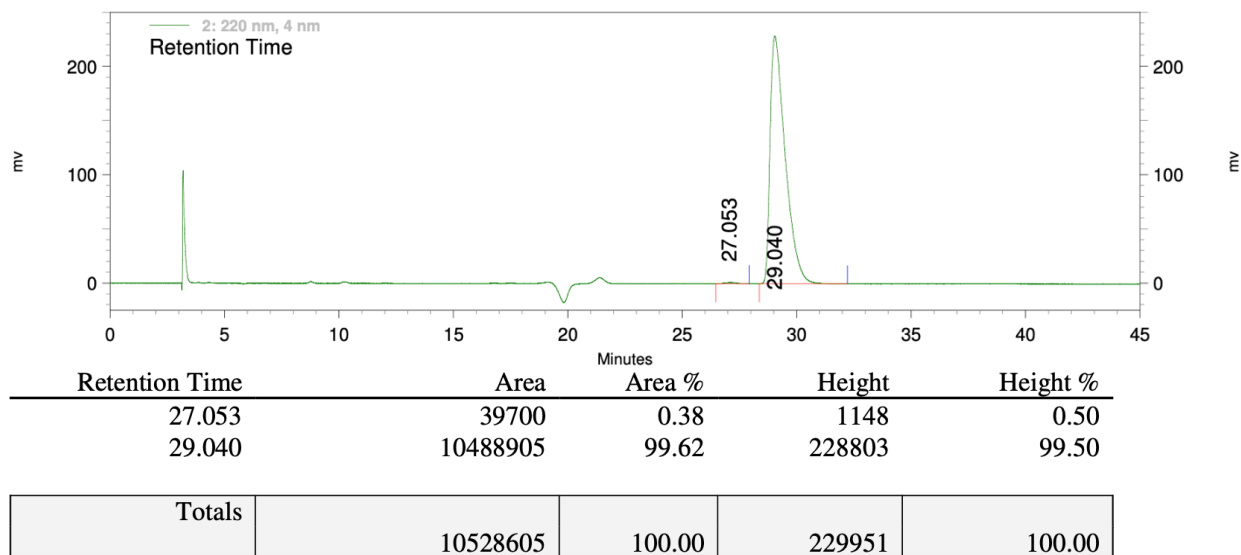

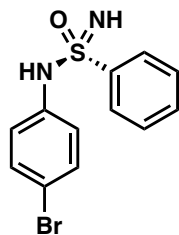

**Column:** Daicel Chiralpak IC; **Solvent:** *n*-hexane/IPA (70:30); **flowrate:** 1 mL/min  
**Chromatogram for sulfonimide: (rac)-10b**

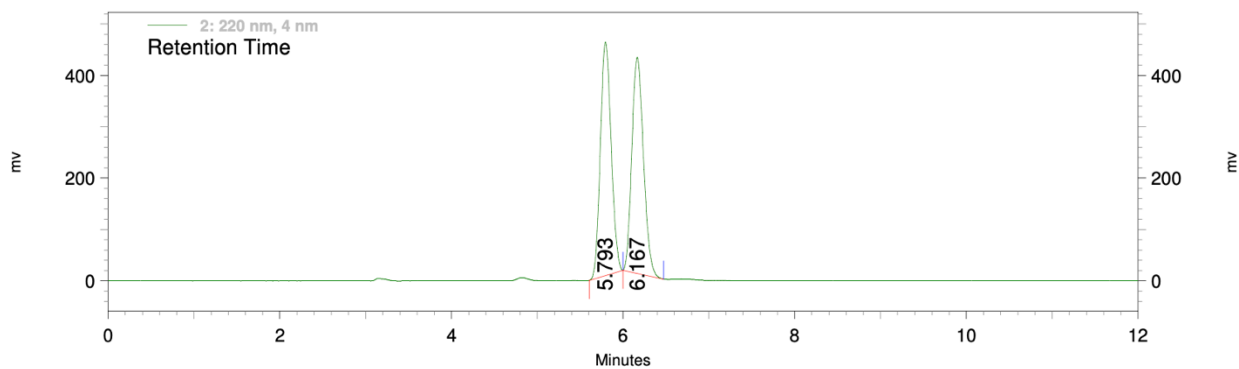

| Retention Time | Area    | Area % | Height | Height % |
|----------------|---------|--------|--------|----------|
| 5.793          | 3983004 | 50.06  | 455000 | 51.95    |
| 6.167          | 3972717 | 49.94  | 420920 | 48.05    |

|        |         |        |        |        |
|--------|---------|--------|--------|--------|
| Totals | 7955721 | 100.00 | 875920 | 100.00 |
|--------|---------|--------|--------|--------|

**Chromatogram for sulfonimide: (S)-10b**

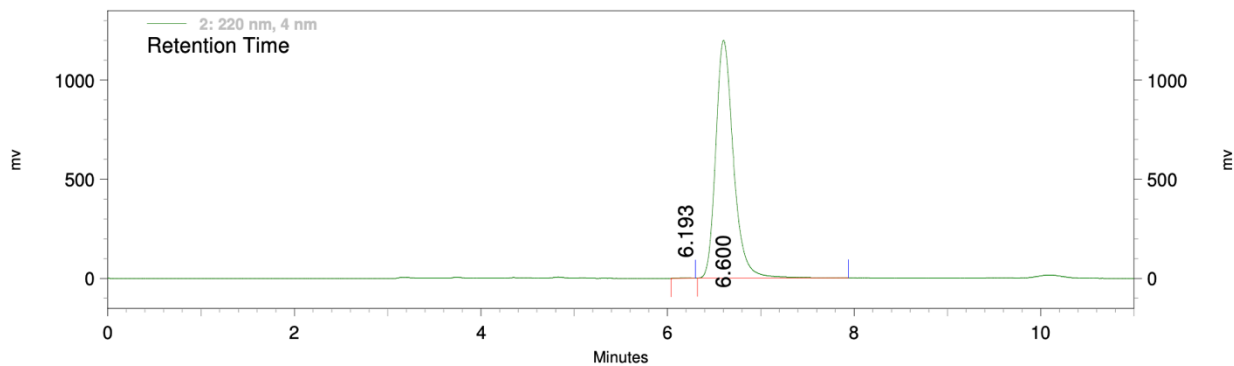

| Retention Time | Area     | Area % | Height  | Height % |
|----------------|----------|--------|---------|----------|
| 6.193          | 14581    | 0.09   | 1774    | 0.15     |
| 6.600          | 15832441 | 99.91  | 1199575 | 99.85    |

|        |          |        |         |        |
|--------|----------|--------|---------|--------|
| Totals | 15847022 | 100.00 | 1201349 | 100.00 |
|--------|----------|--------|---------|--------|

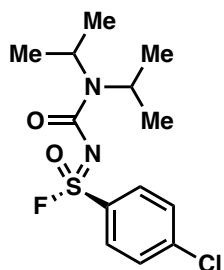

**Column:** Daicel Chiralpak IC; **Solvent:** *n*-hexane/IPA (70:30); **flowrate:** 1 mL/min  
**Chromatogram for sulfonimidoxy fluoride: (rac)-12**

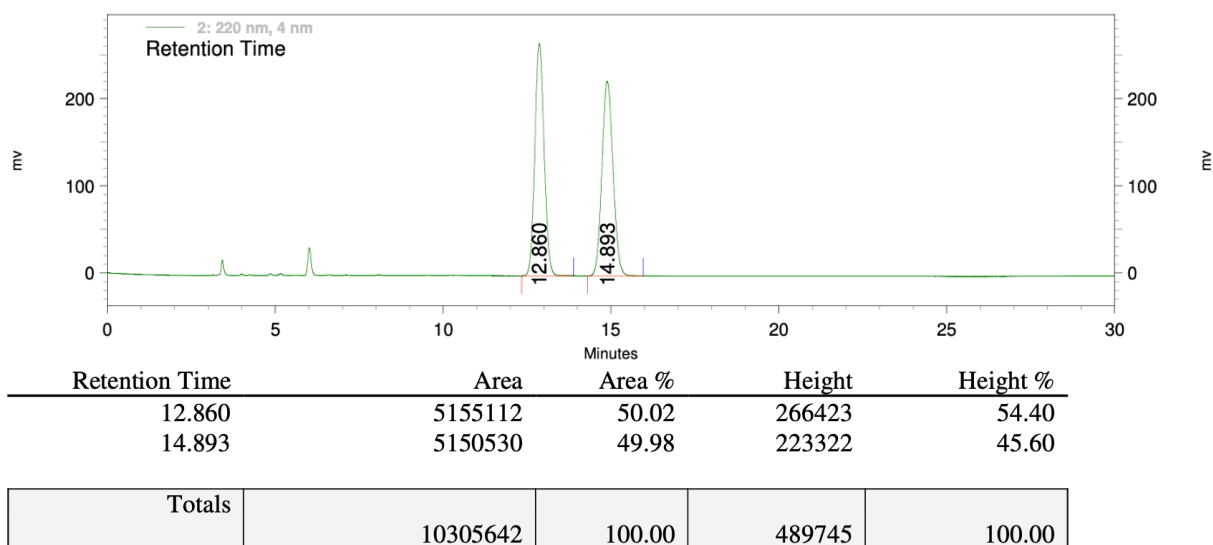

**Chromatogram for sulfonimidoxy fluoride: (S)-12**

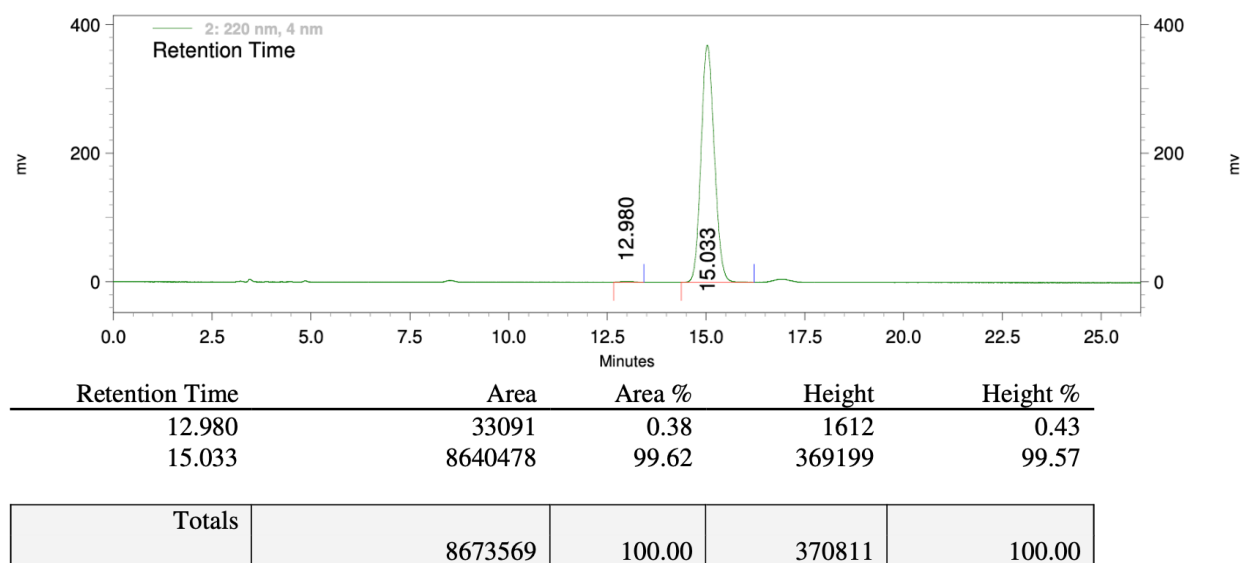

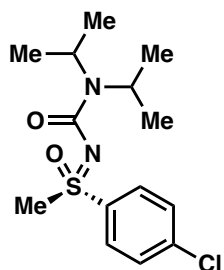

**Column:** Daicel Chiralpak IC; **Solvent:** *n*-hexane/IPA (70:30); **flowrate:** 1 mL/min  
**Chromatogram for sulfoximine: (rac)-13**

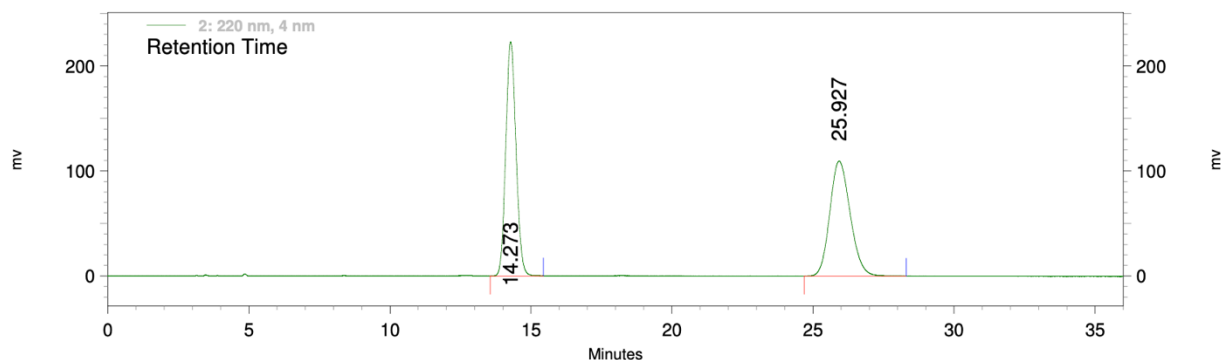

| Retention Time | Area    | Area % | Height | Height % |
|----------------|---------|--------|--------|----------|
| 14.273         | 5642446 | 50.50  | 223116 | 67.06    |
| 25.927         | 5529976 | 49.50  | 109615 | 32.94    |

|        |          |        |        |        |
|--------|----------|--------|--------|--------|
| Totals | 11172422 | 100.00 | 332731 | 100.00 |
|--------|----------|--------|--------|--------|

**Chromatogram for sulfoximine: (S)-13**

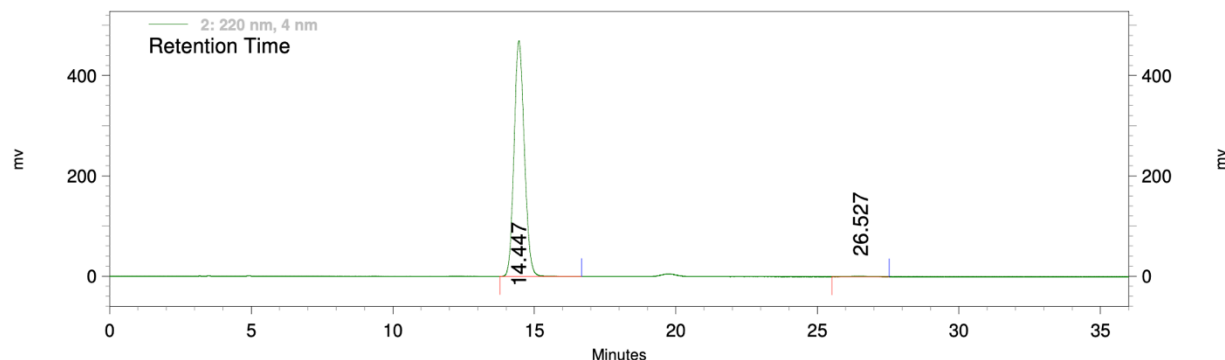

| Retention Time | Area     | Area % | Height | Height % |
|----------------|----------|--------|--------|----------|
| 14.447         | 11928605 | 99.53  | 469990 | 99.78    |
| 26.527         | 56062    | 0.47   | 1032   | 0.22     |

|        |          |        |        |        |
|--------|----------|--------|--------|--------|
| Totals | 11984667 | 100.00 | 471022 | 100.00 |
|--------|----------|--------|--------|--------|

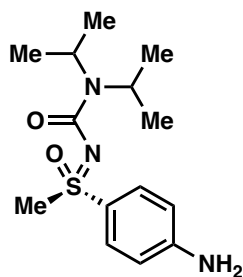

**Column:** Daicel Chiralpak IC; **Solvent:** *n*-hexane/IPA (70:30); **flowrate:** 1 mL/min  
**Chromatogram for sulfoximine: (rac)-16**

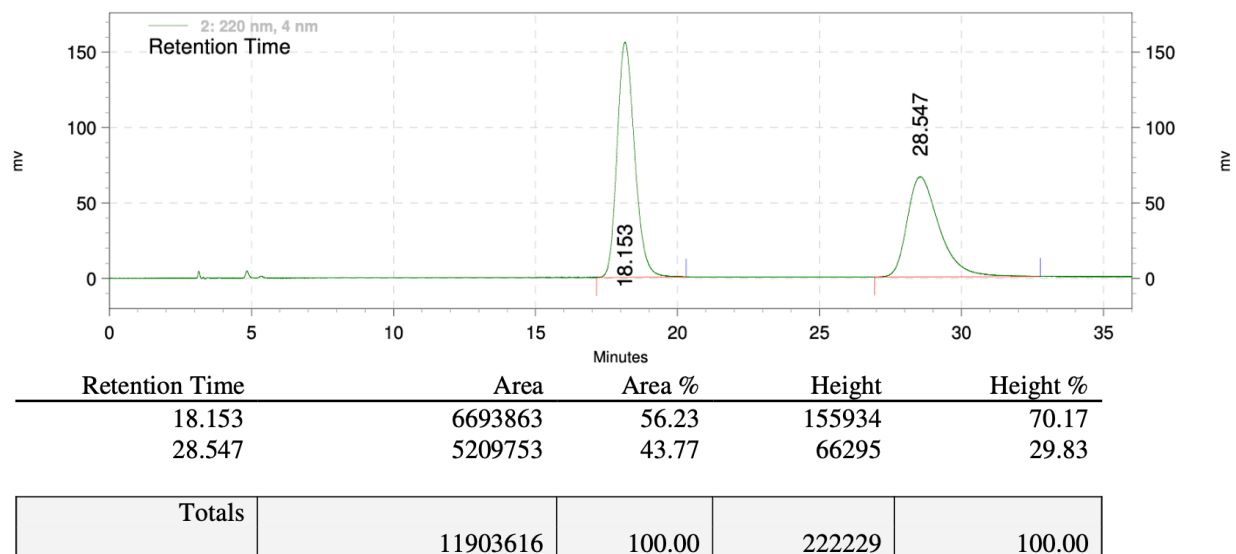

**Chromatogram for sulfoximine: (S)-16**

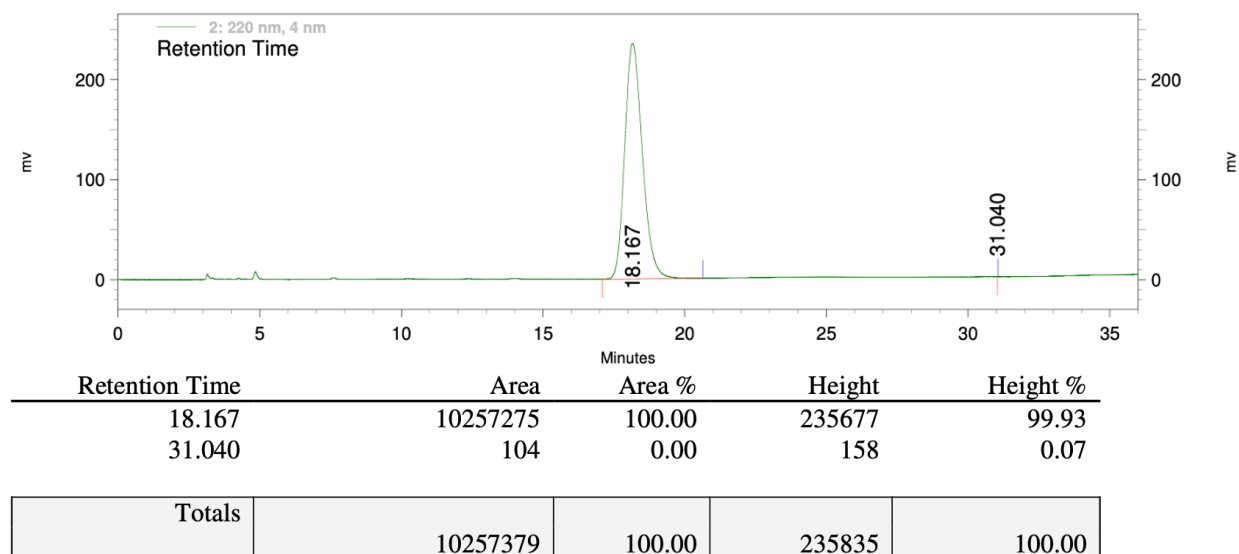

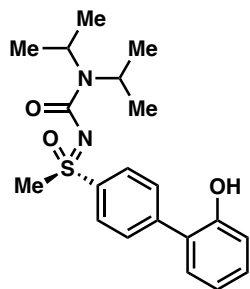

**Column:** Daicel Chiralpak IC; **Solvent:** *n*-hexane/IPA (70:30); **flowrate:** 1 mL/min  
**Chromatogram for sulfoximine: (*rac*)-urea protected 15**

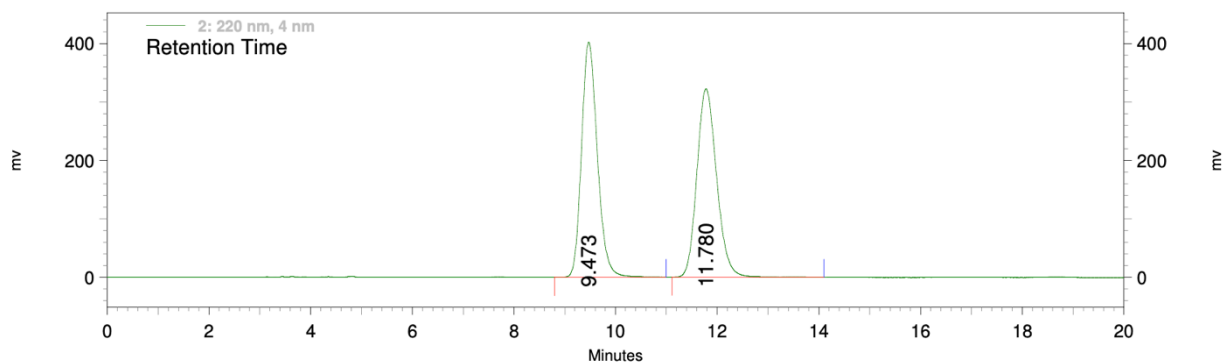

| Retention Time | Area    | Area % | Height | Height % |
|----------------|---------|--------|--------|----------|
| 9.473          | 8711406 | 49.96  | 402538 | 55.53    |
| 11.780         | 8726869 | 50.04  | 322403 | 44.47    |

|        |          |        |        |        |
|--------|----------|--------|--------|--------|
| Totals | 17438275 | 100.00 | 724941 | 100.00 |
|--------|----------|--------|--------|--------|

**Chromatogram for sulfoximine: (*S*)-urea protected 15**

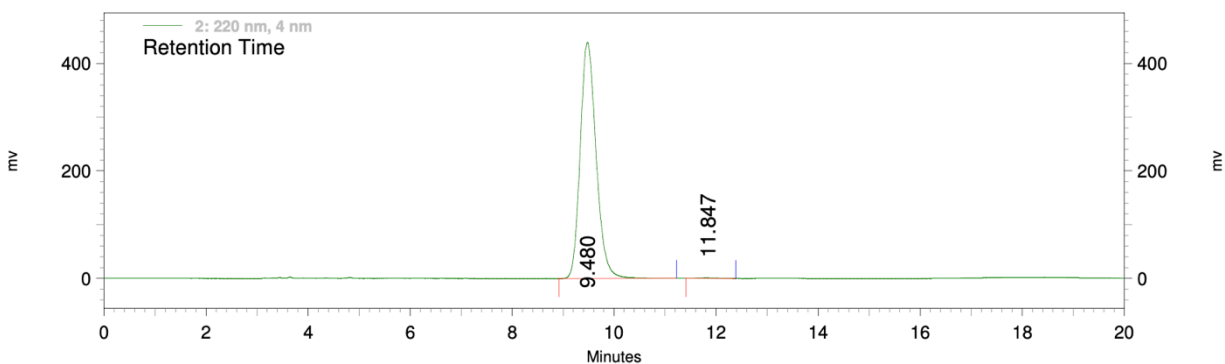

| Retention Time | Area    | Area % | Height | Height % |
|----------------|---------|--------|--------|----------|
| 9.480          | 9527986 | 99.65  | 439718 | 99.71    |
| 11.847         | 33056   | 0.35   | 1279   | 0.29     |

|        |         |        |        |        |
|--------|---------|--------|--------|--------|
| Totals | 9561042 | 100.00 | 440997 | 100.00 |
|--------|---------|--------|--------|--------|



**Column:** Daicel Chiralpak IC; **Solvent:** *n*-hexane/IPA (70:30); **flowrate:** 1 mL/min  
**Chromatogram for sulfoximine: (rac)-15**

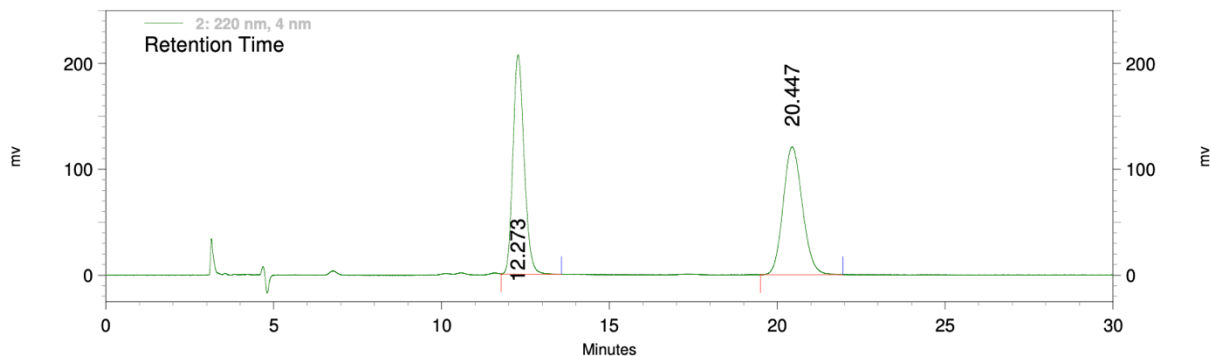

| Retention Time | Area    | Area % | Height | Height % |
|----------------|---------|--------|--------|----------|
| 12.273         | 4810476 | 49.93  | 206899 | 63.11    |
| 20.447         | 4824227 | 50.07  | 120931 | 36.89    |

|        |         |        |        |        |
|--------|---------|--------|--------|--------|
| Totals | 9634703 | 100.00 | 327830 | 100.00 |
|--------|---------|--------|--------|--------|

**Chromatogram for sulfoximine: (S)-15**

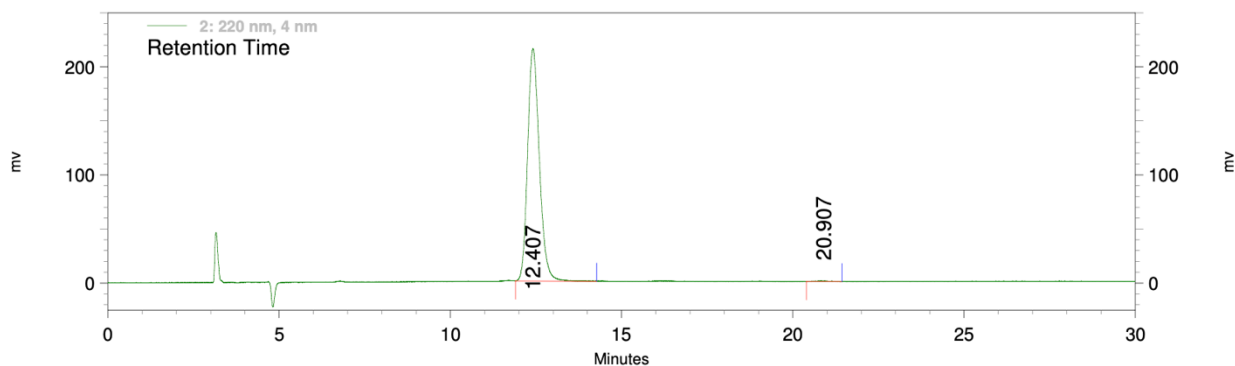

| Retention Time | Area    | Area % | Height | Height % |
|----------------|---------|--------|--------|----------|
| 12.407         | 5129210 | 99.59  | 214841 | 99.71    |
| 20.907         | 21153   | 0.41   | 619    | 0.29     |

|        |         |        |        |        |
|--------|---------|--------|--------|--------|
| Totals | 5150363 | 100.00 | 215460 | 100.00 |
|--------|---------|--------|--------|--------|

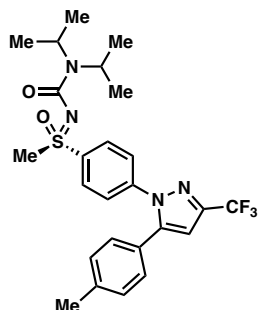

**Column:** Daicel Chiralpak IC; **Solvent:** *n*-hexane/IPA (70:30); **flowrate:** 1 mL/min  
**Chromatogram for sulfoximine: (rac)-19**

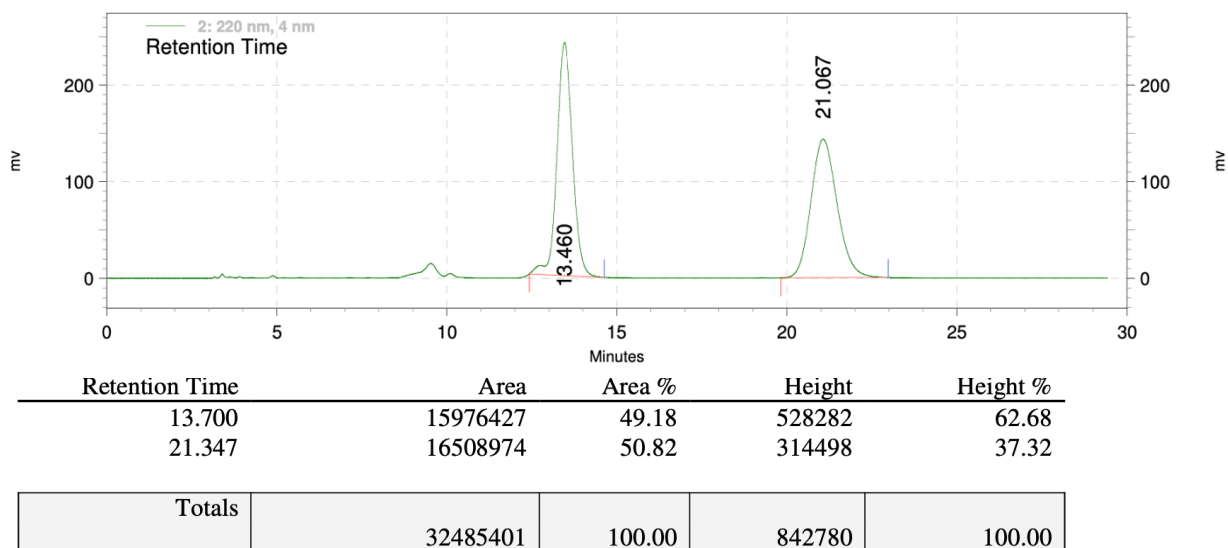

**Chromatogram for sulfoximine: (S)-19**

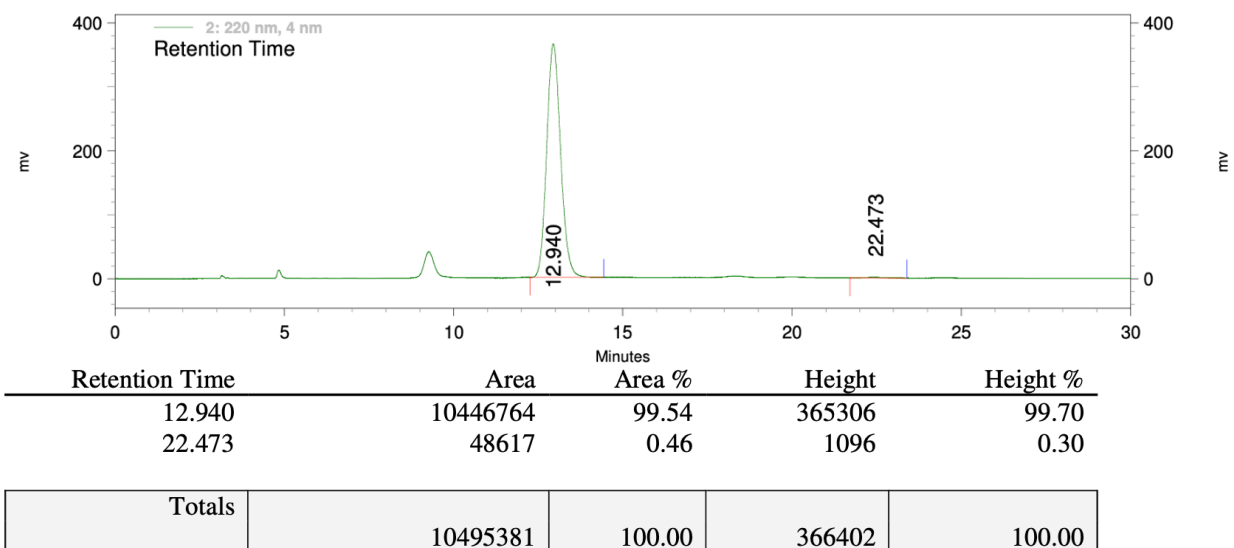

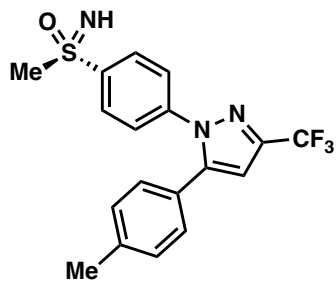

**Column:** Daicel Chiralpak IC; **Solvent:** *n*-hexane/IPA (70:30); **flowrate:** 1 mL/min  
**Chromatogram for sulfoximine: (rac)-20**

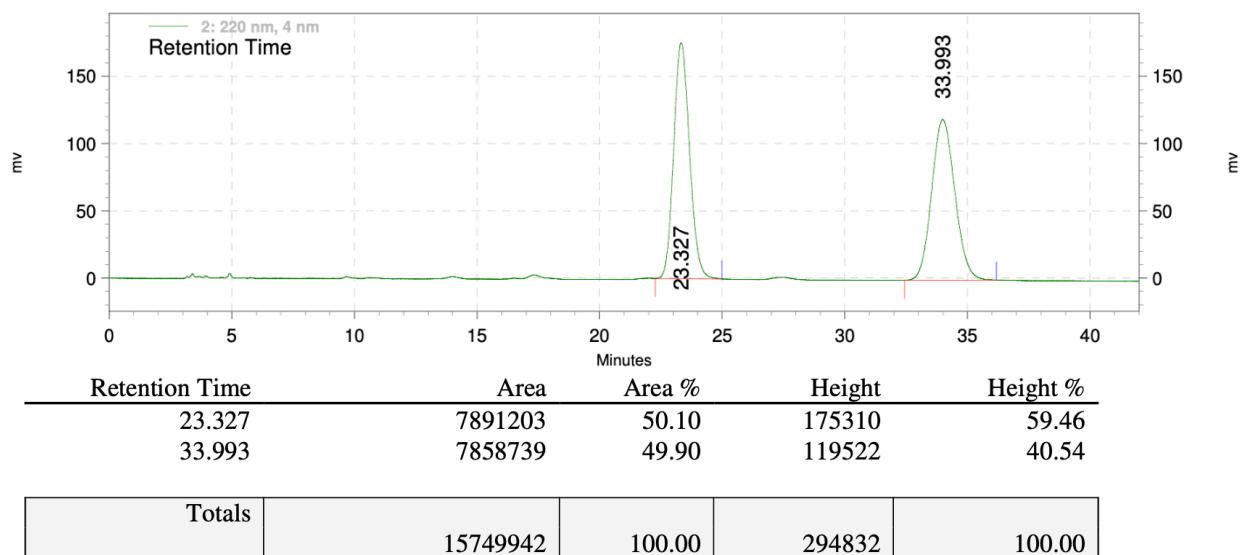

**Chromatogram for sulfoximine: (S)-20**

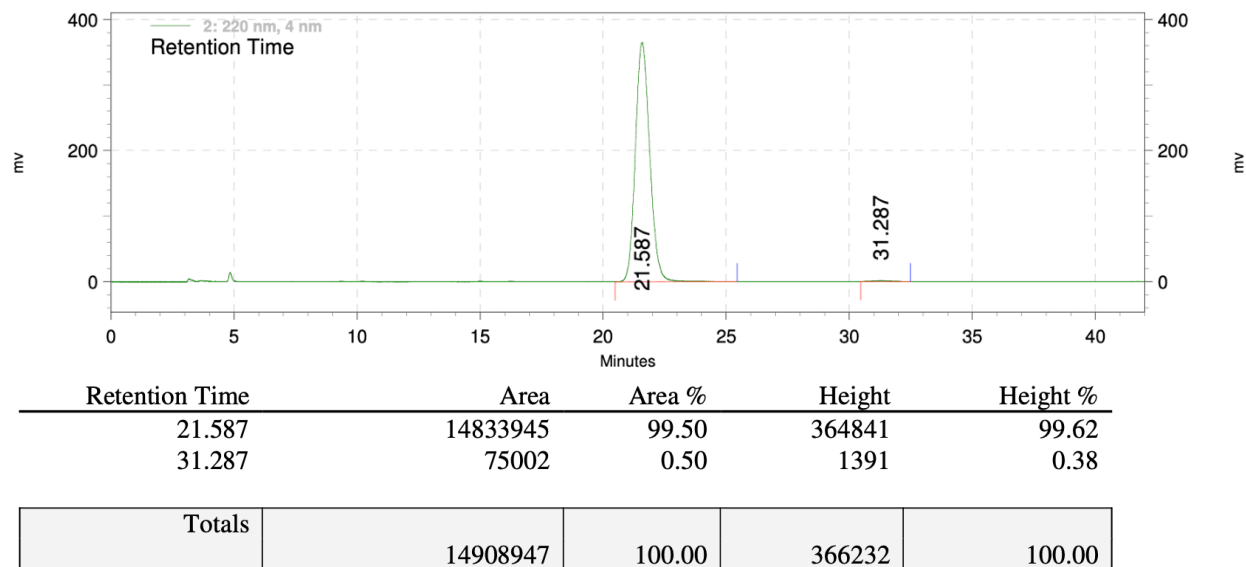

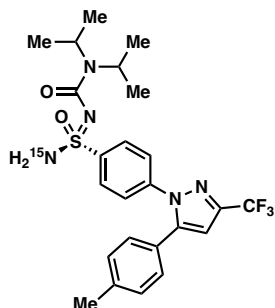

**Column:** Daicel Chiralpak IC; **Solvent:** *n*-hexane/IPA (70:30); **flowrate:** 1 mL/min  
**Chromatogram for sulfonimidamide: (rac)-21**

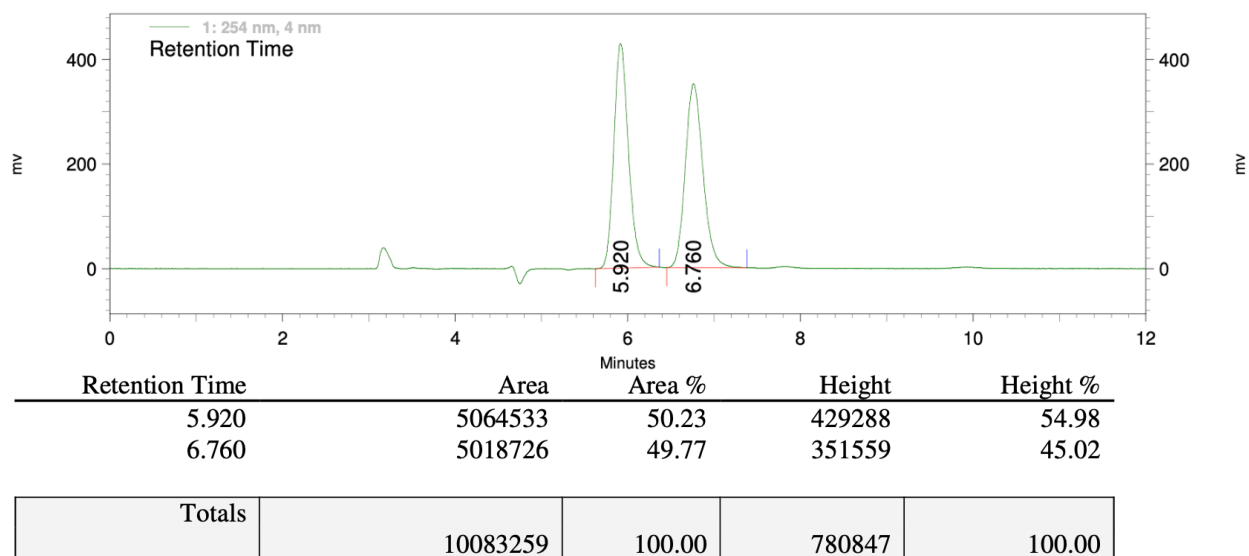

**Chromatogram for sulfonimidamide: (*R*)-21**

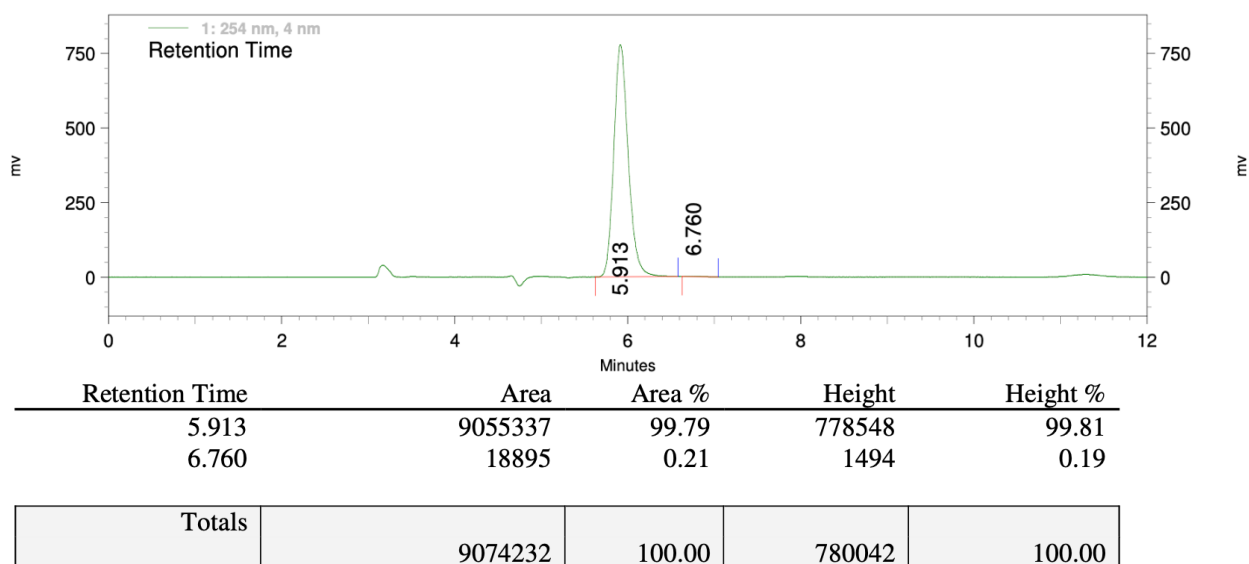

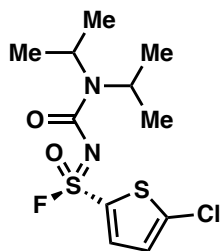

**Column:** Daicel Chiralpak IC; **Solvent:** *n*-hexane/IPA (70:30); **flowrate:** 1 mL/min  
**Chromatogram for sulfonimidothioate: (rac)-24**

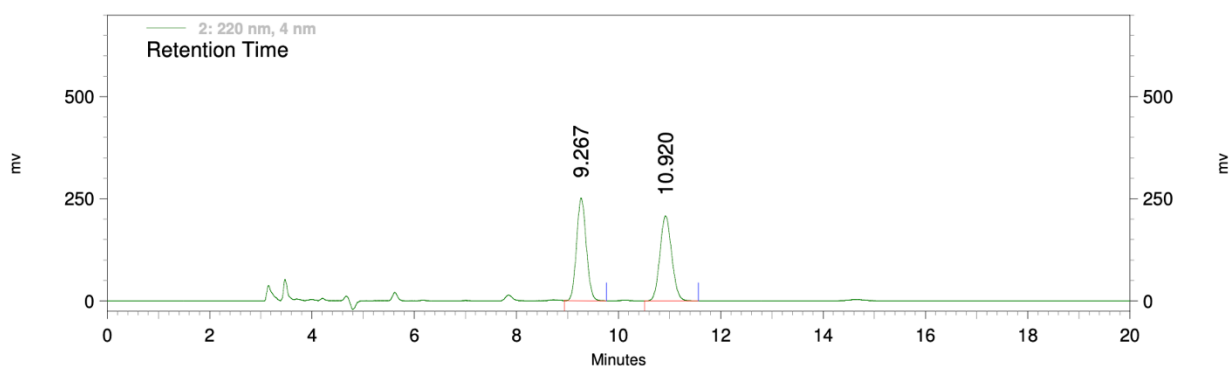

| Retention Time | Area    | Area % | Height | Height % |
|----------------|---------|--------|--------|----------|
| 9.267          | 3322402 | 49.87  | 250933 | 54.71    |
| 10.920         | 3339908 | 50.13  | 207768 | 45.29    |

|        |         |        |        |        |
|--------|---------|--------|--------|--------|
| Totals | 6662310 | 100.00 | 458701 | 100.00 |
|--------|---------|--------|--------|--------|

**Chromatogram for sulfonimidothioate: (S)-24**

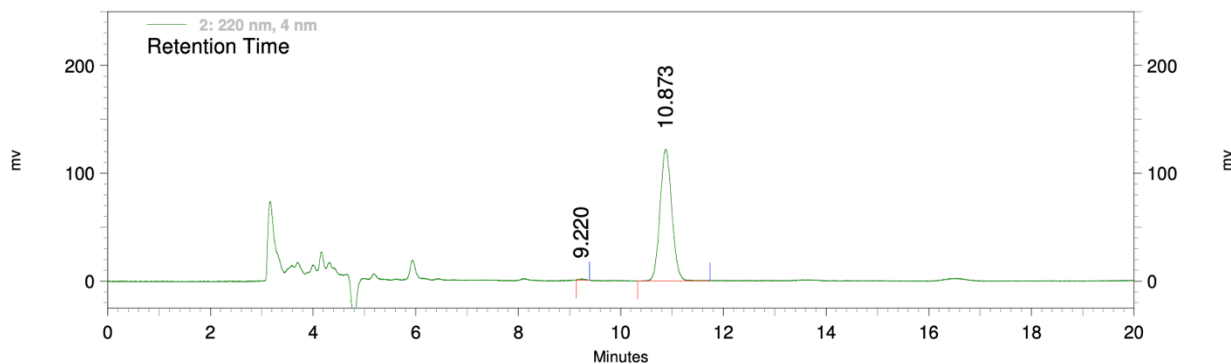

| Retention Time | Area    | Area % | Height | Height % |
|----------------|---------|--------|--------|----------|
| 9.220          | 8254    | 0.42   | 1046   | 0.85     |
| 10.873         | 1946605 | 99.58  | 121833 | 99.15    |

|        |         |        |        |        |
|--------|---------|--------|--------|--------|
| Totals | 1954859 | 100.00 | 122879 | 100.00 |
|--------|---------|--------|--------|--------|

### XIII. NMR Spectra

$^1\text{H}$  NMR of *N,N*-diisopropyl carbamoyl chloride:

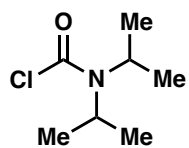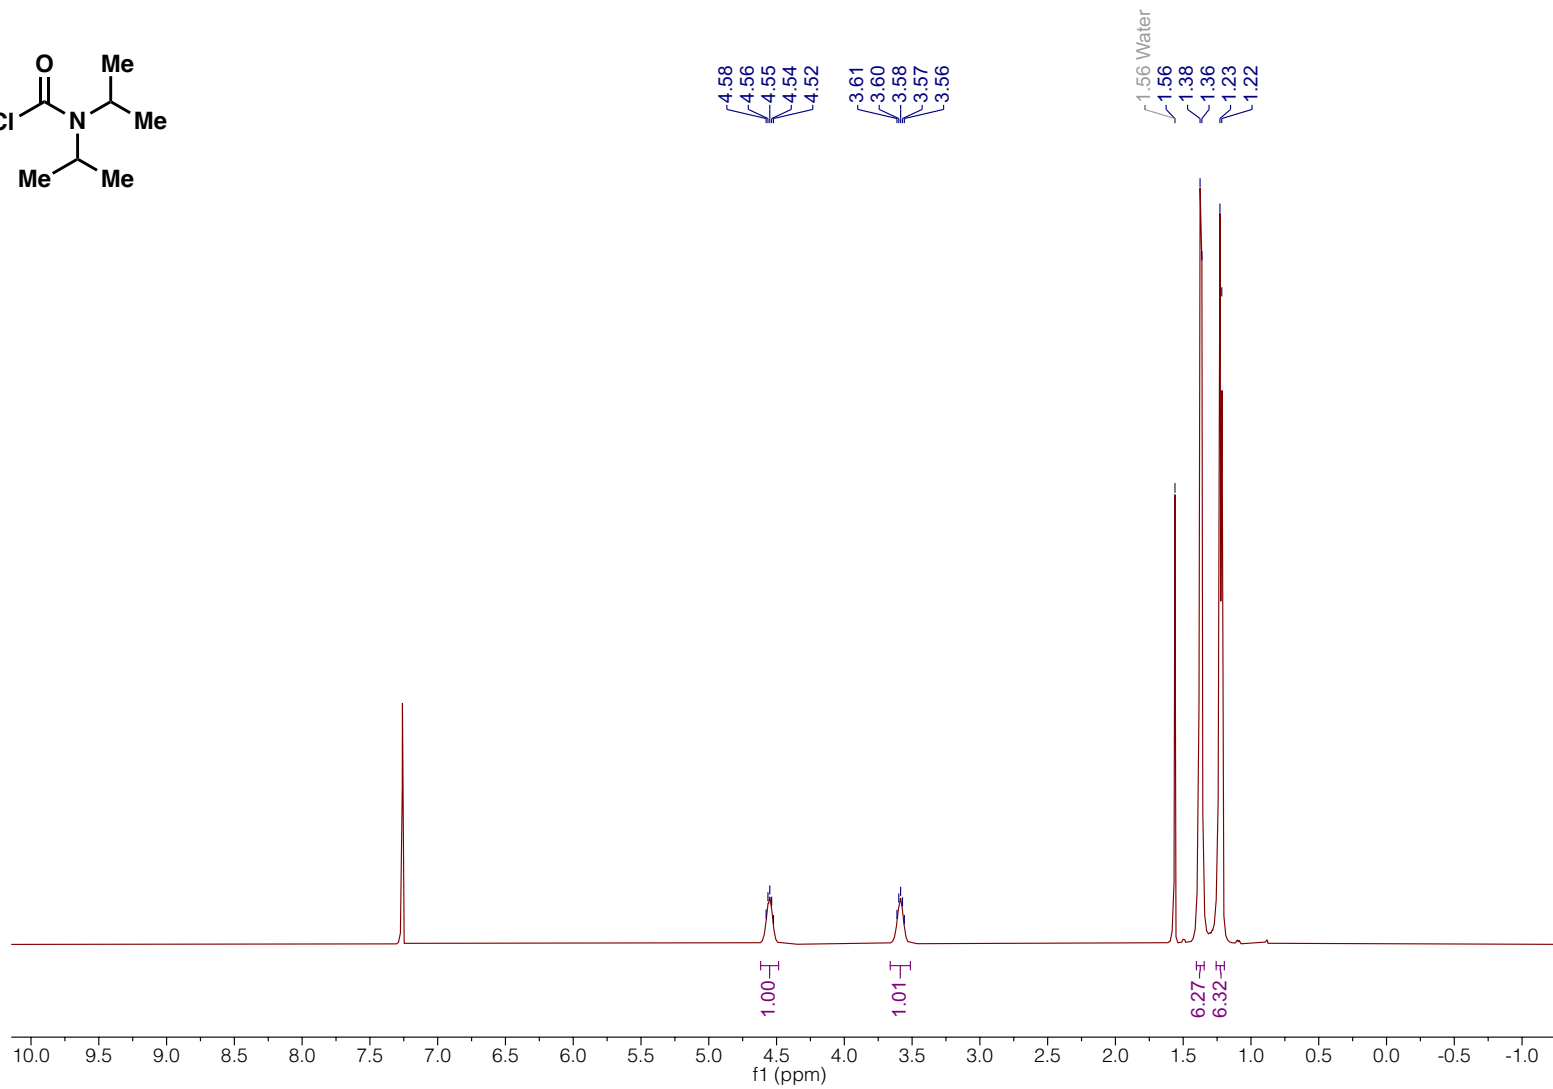

**$^{13}\text{C}$  NMR of *N,N*-diisopropyl carbamoyl chloride:**

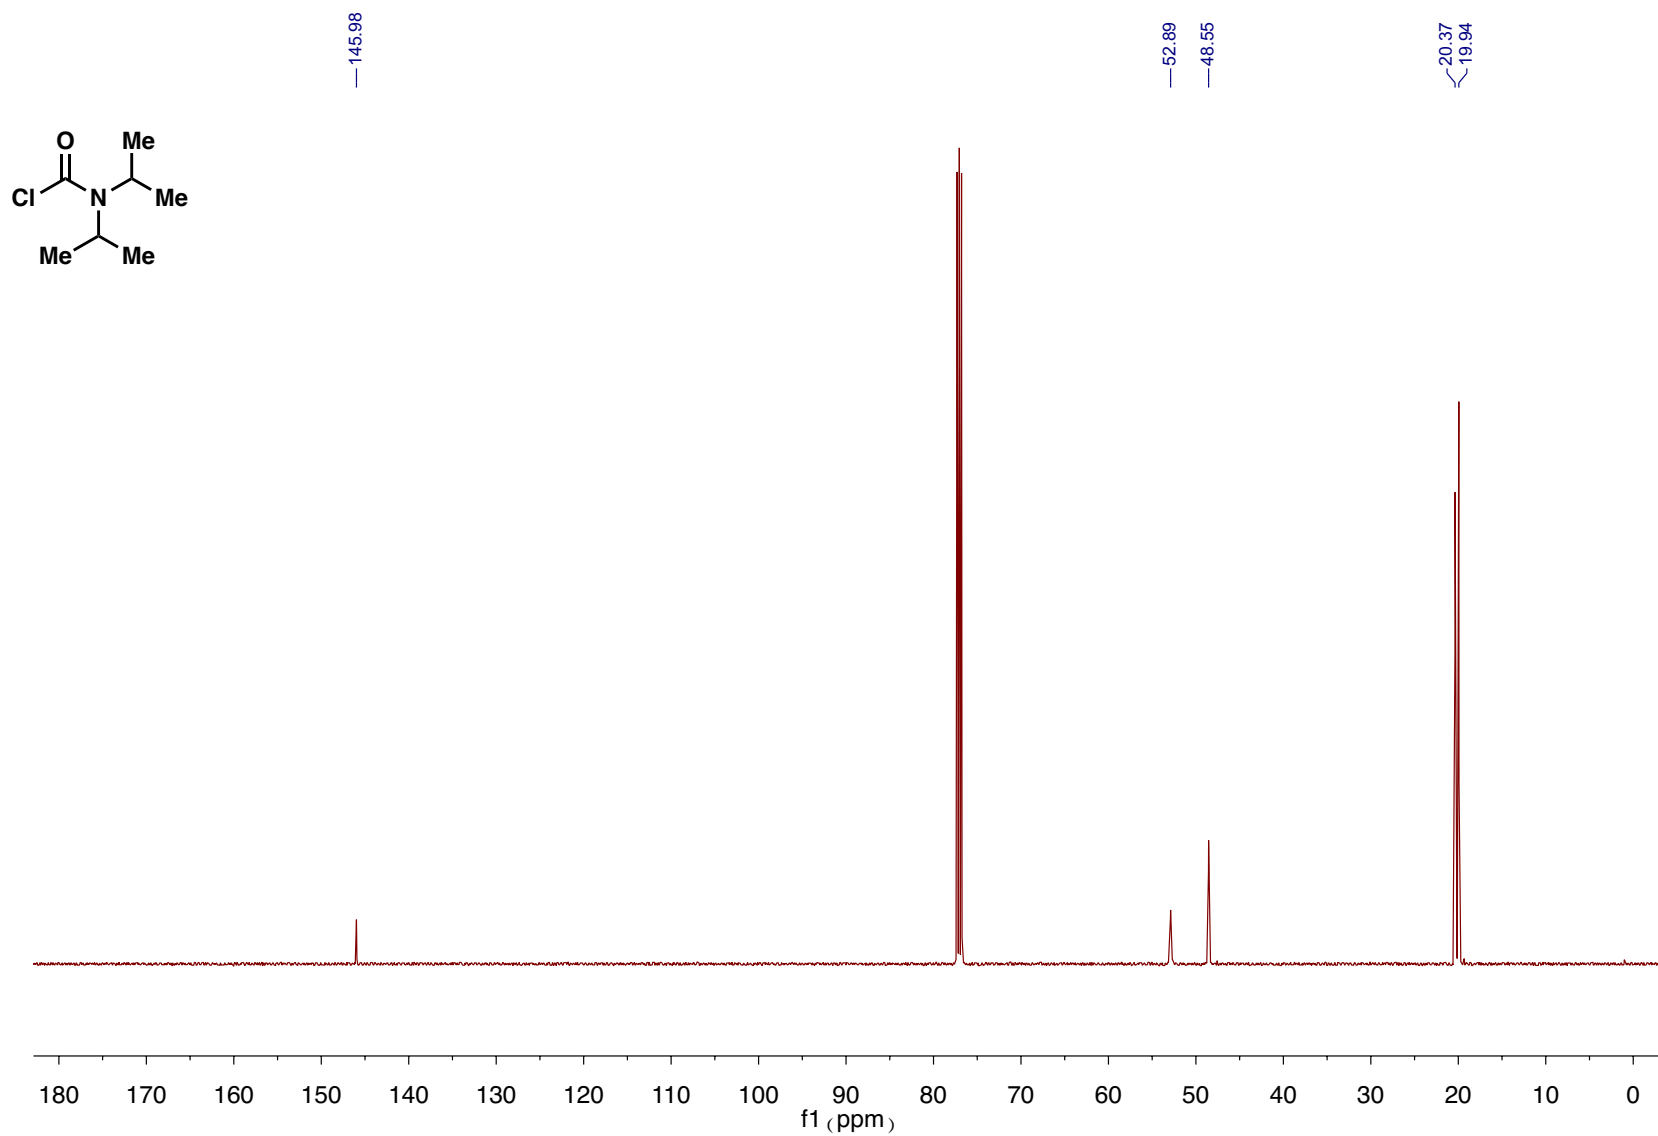

<sup>1</sup>H NMR of compound (S)-*t*-BuSF:

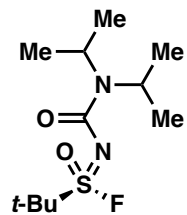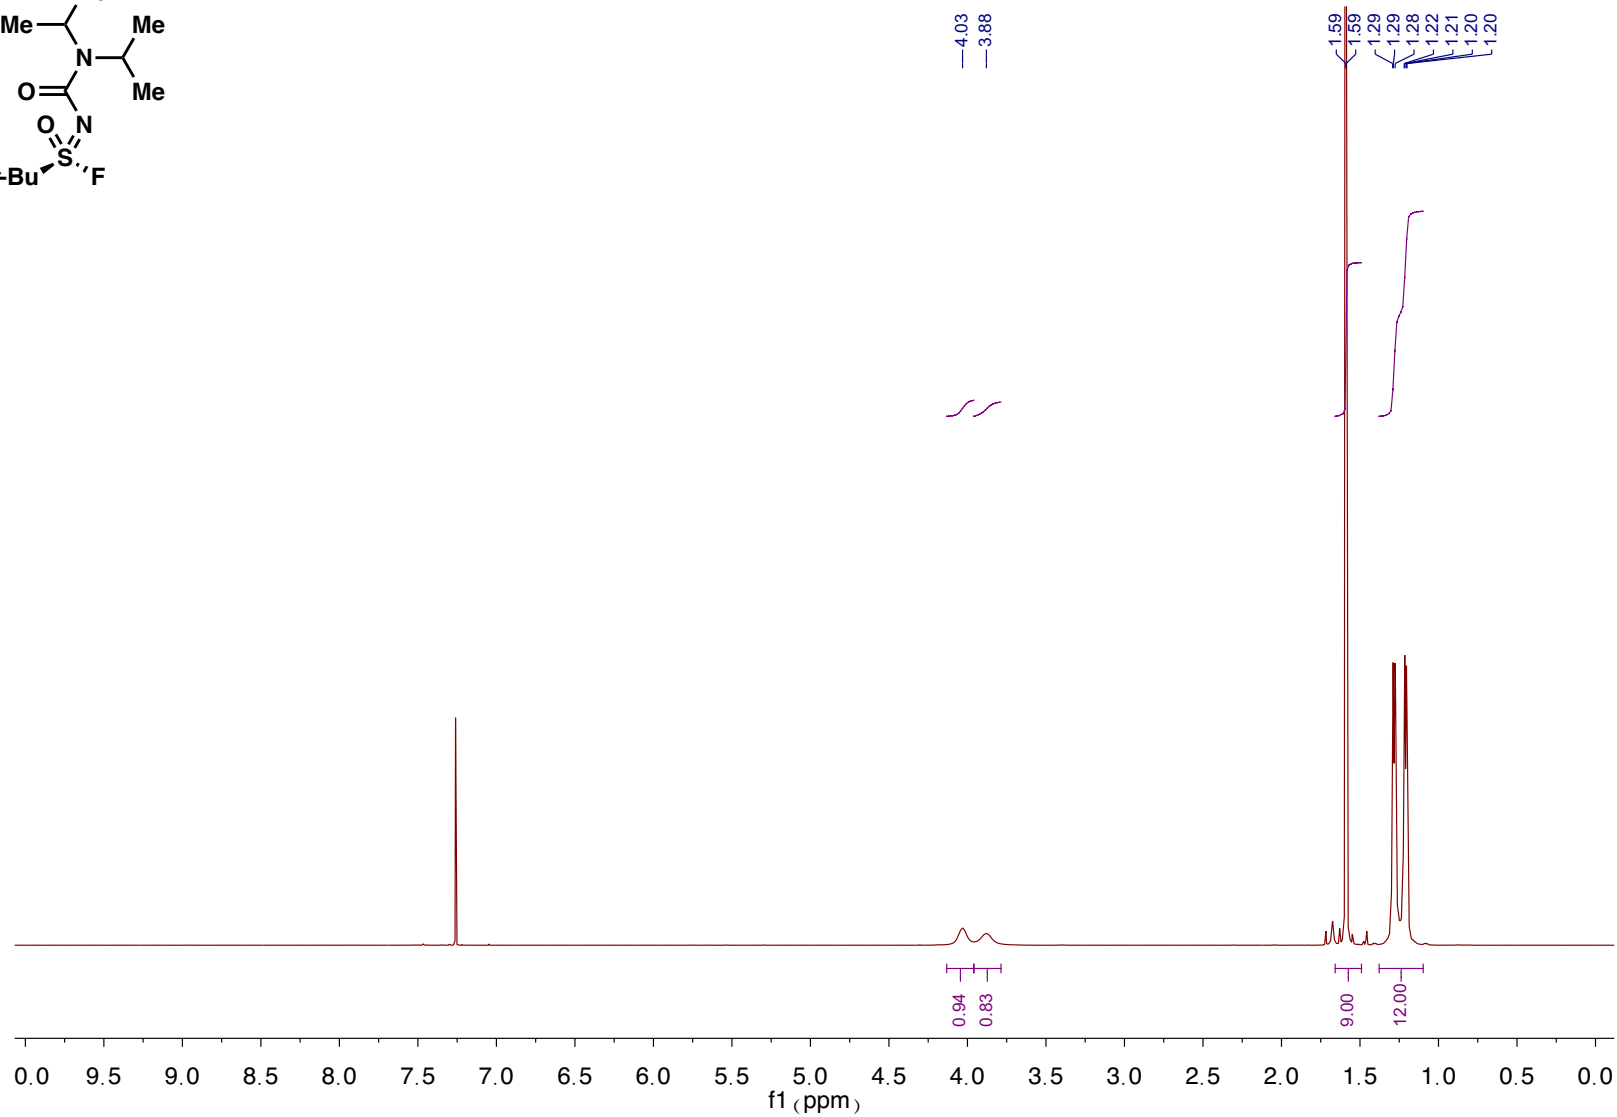

**$^{13}\text{C}$  NMR of compound (S)-*t*-BuSF:**

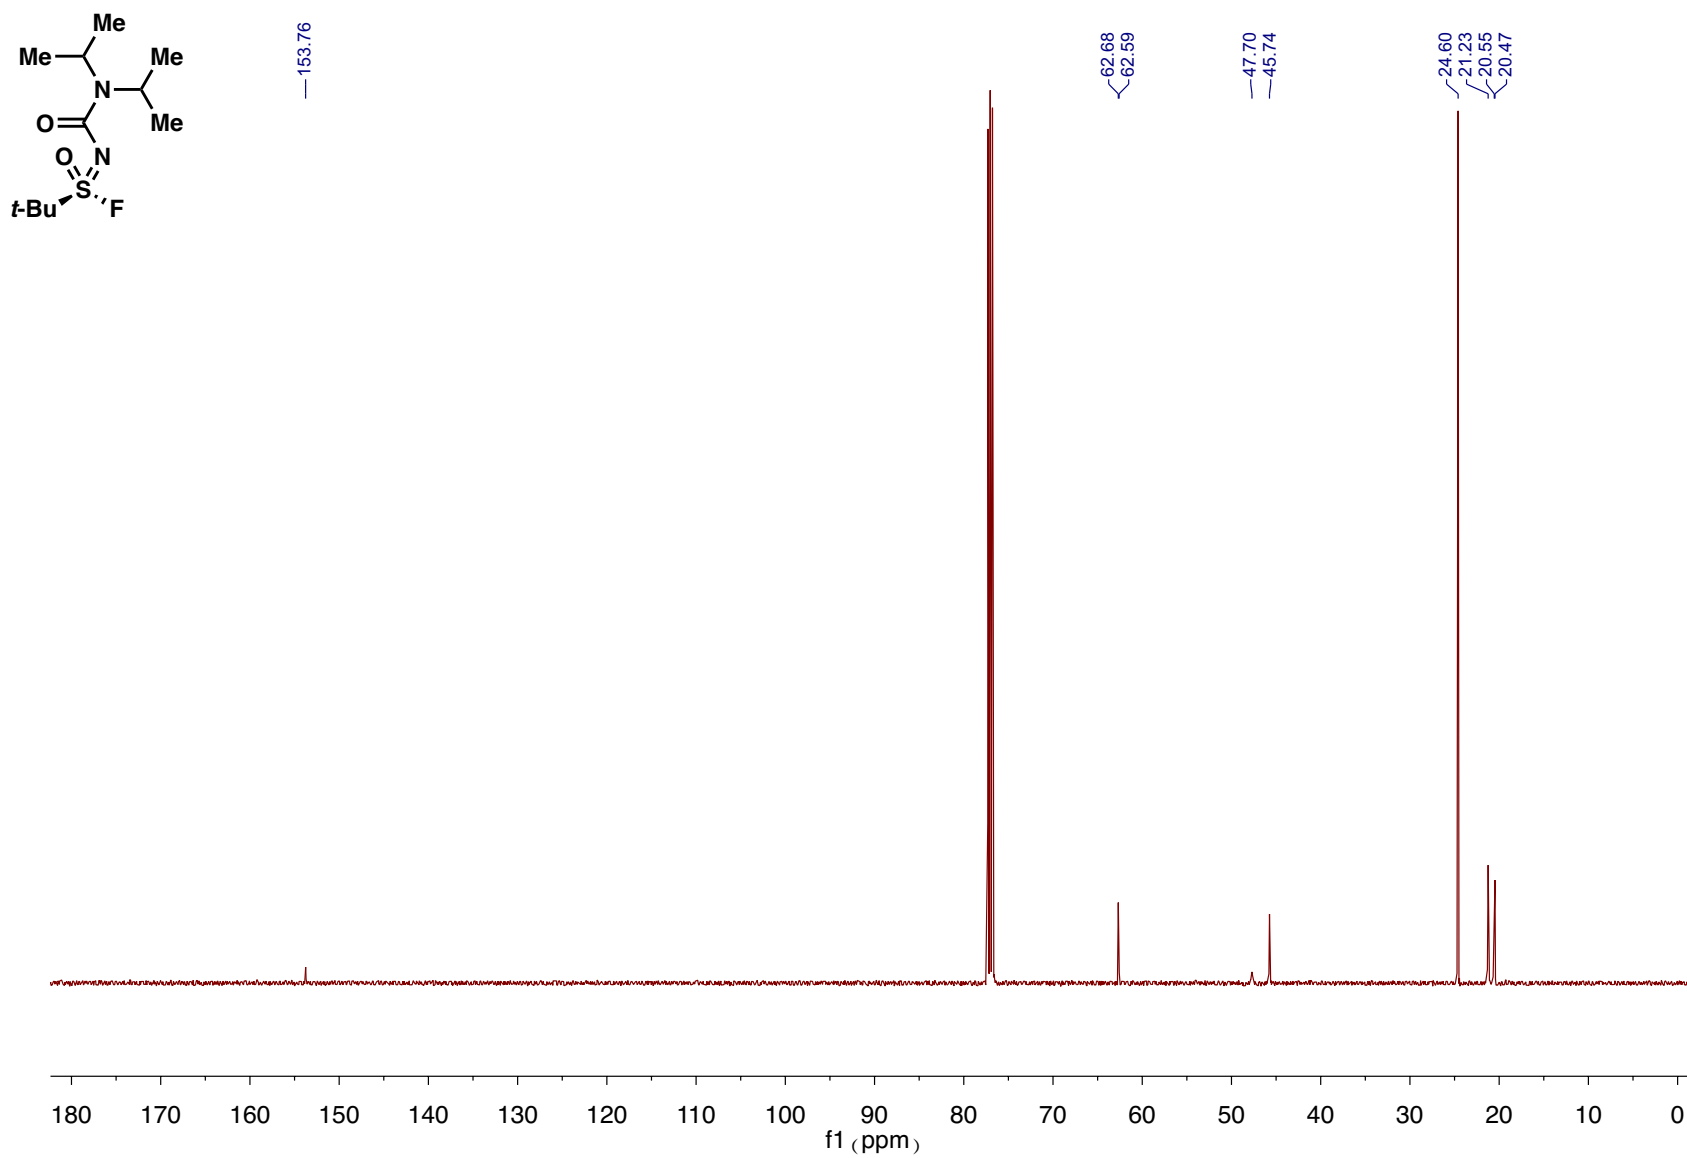

**$^{19}\text{F}$  NMR of compound (*S*)-*t*-BuSF:**

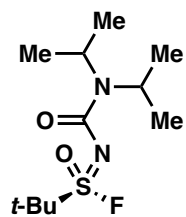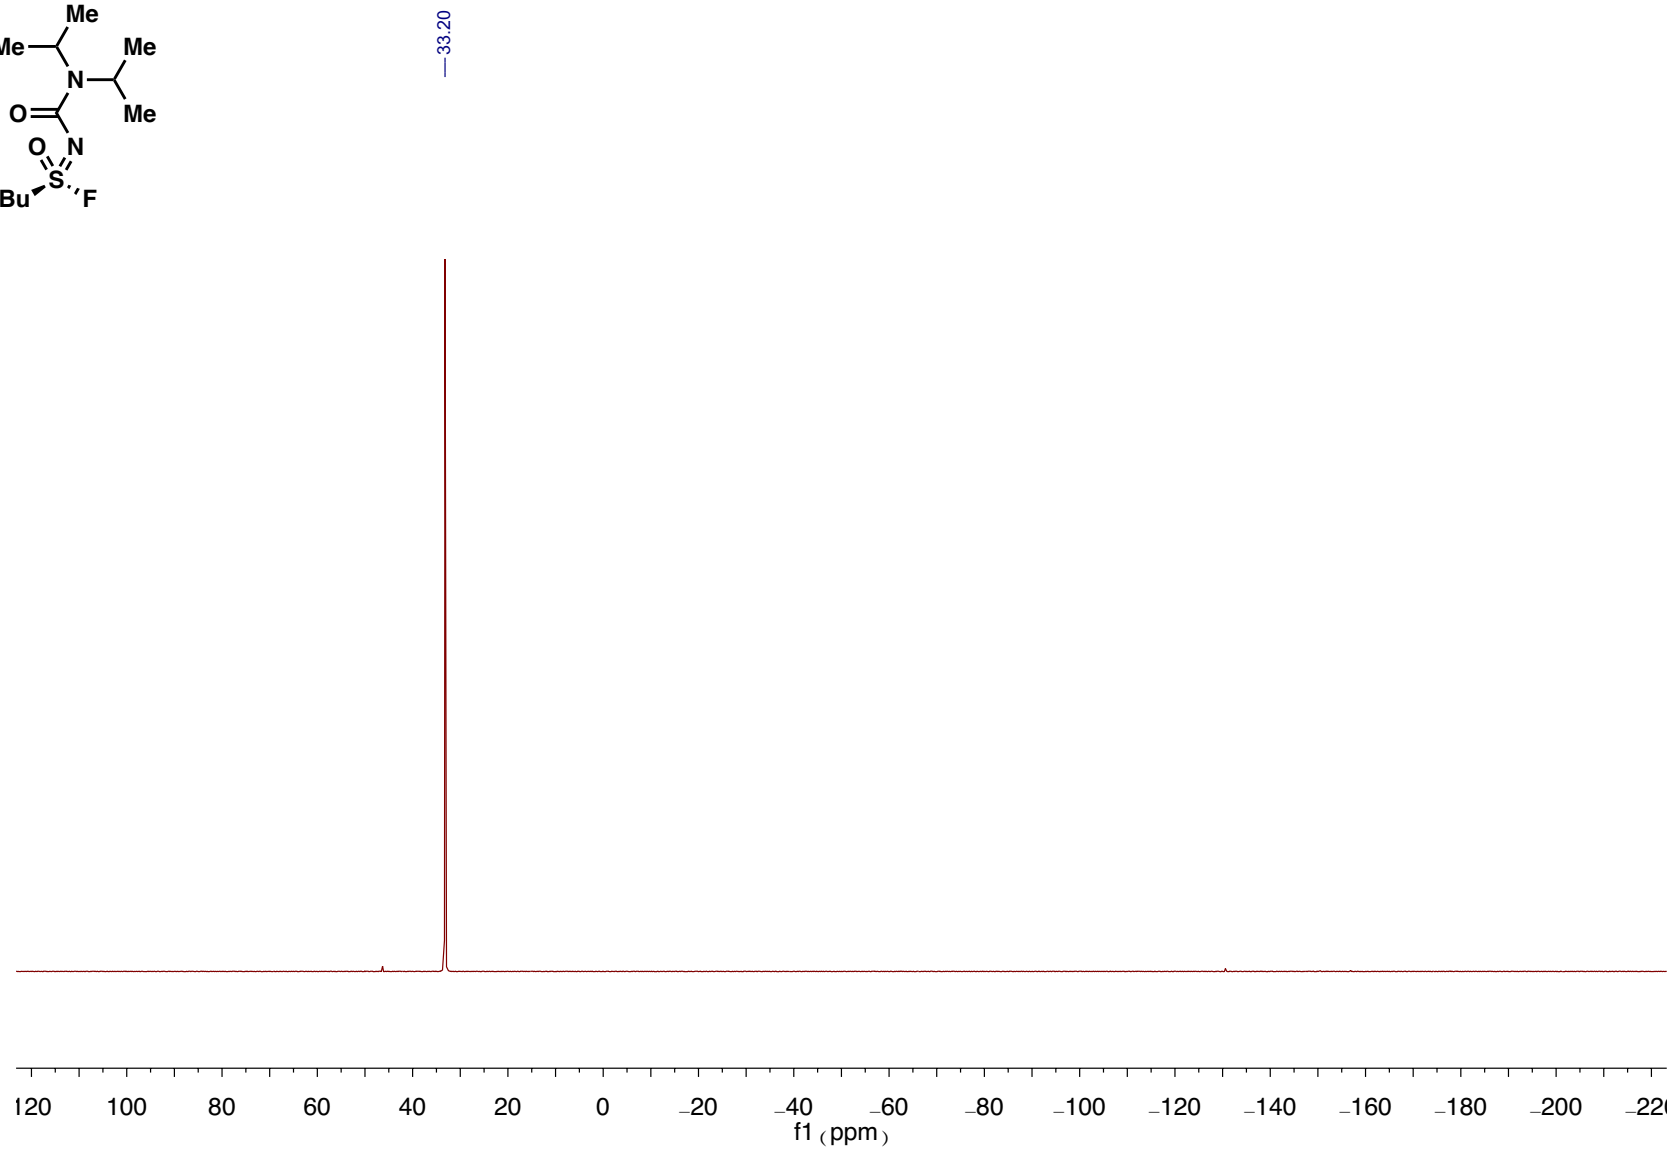

*tert*-butyl sulfoximines

<sup>1</sup>H NMR of compound 2a:

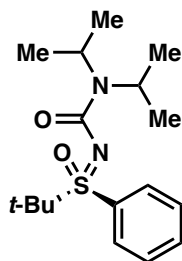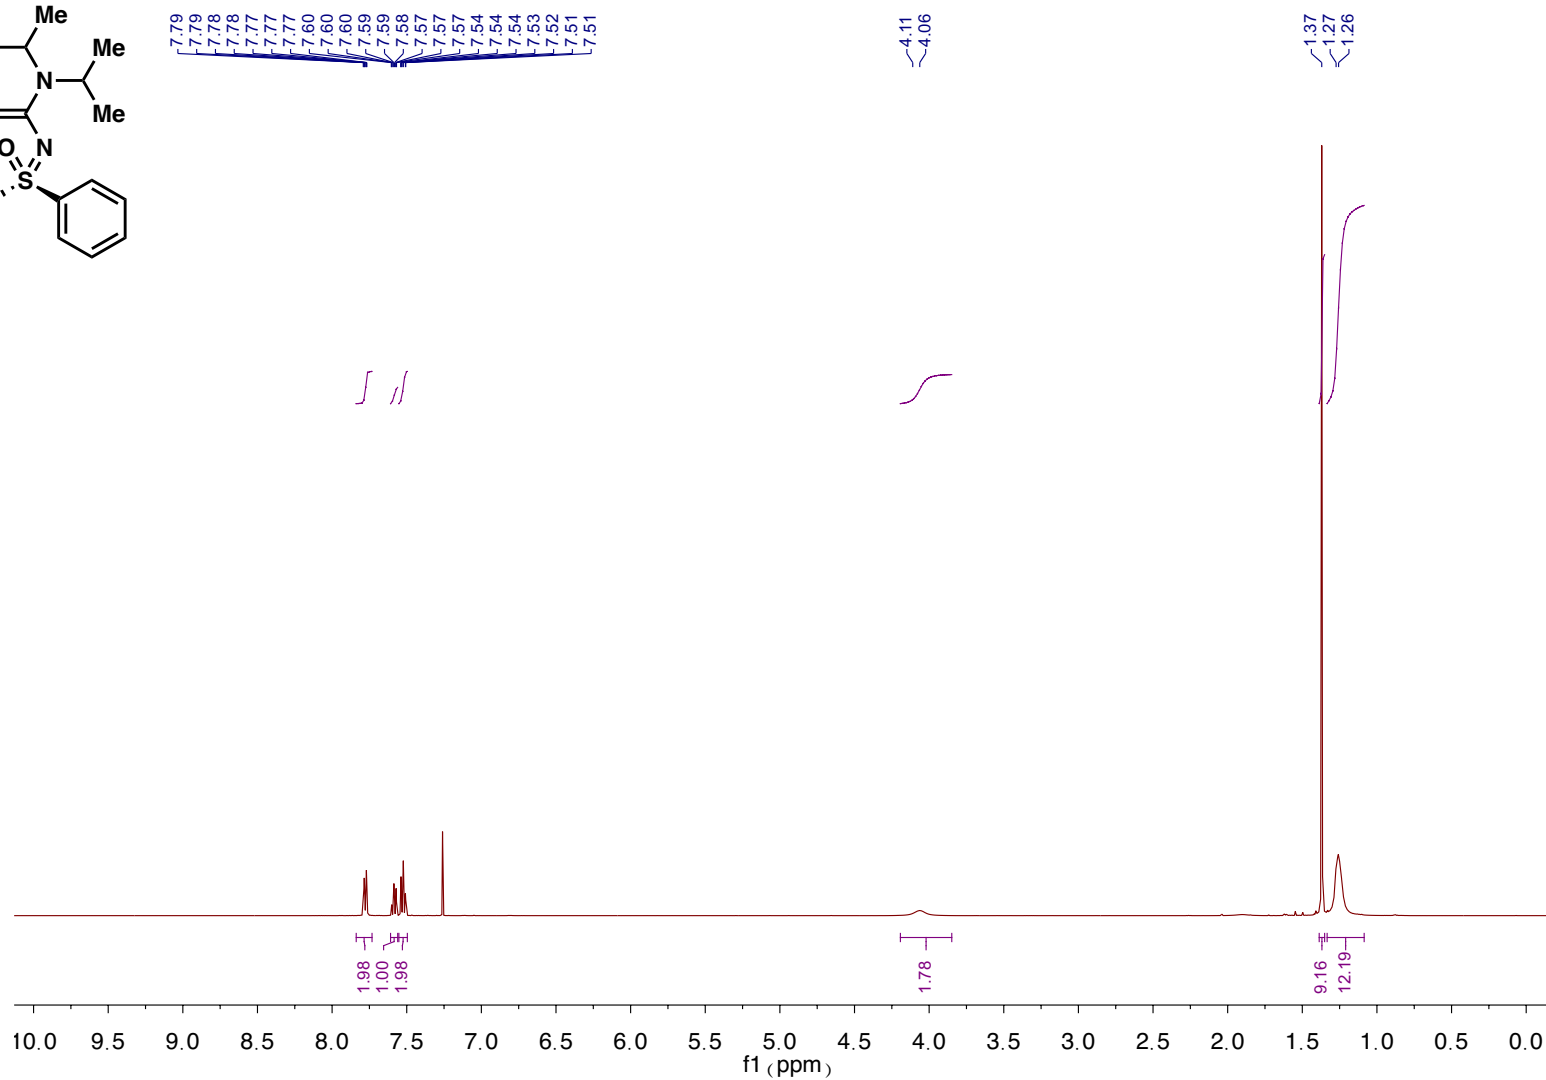

**<sup>13</sup>C NMR of compound 2a:**

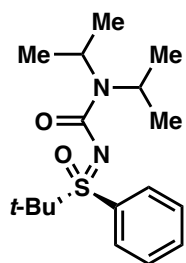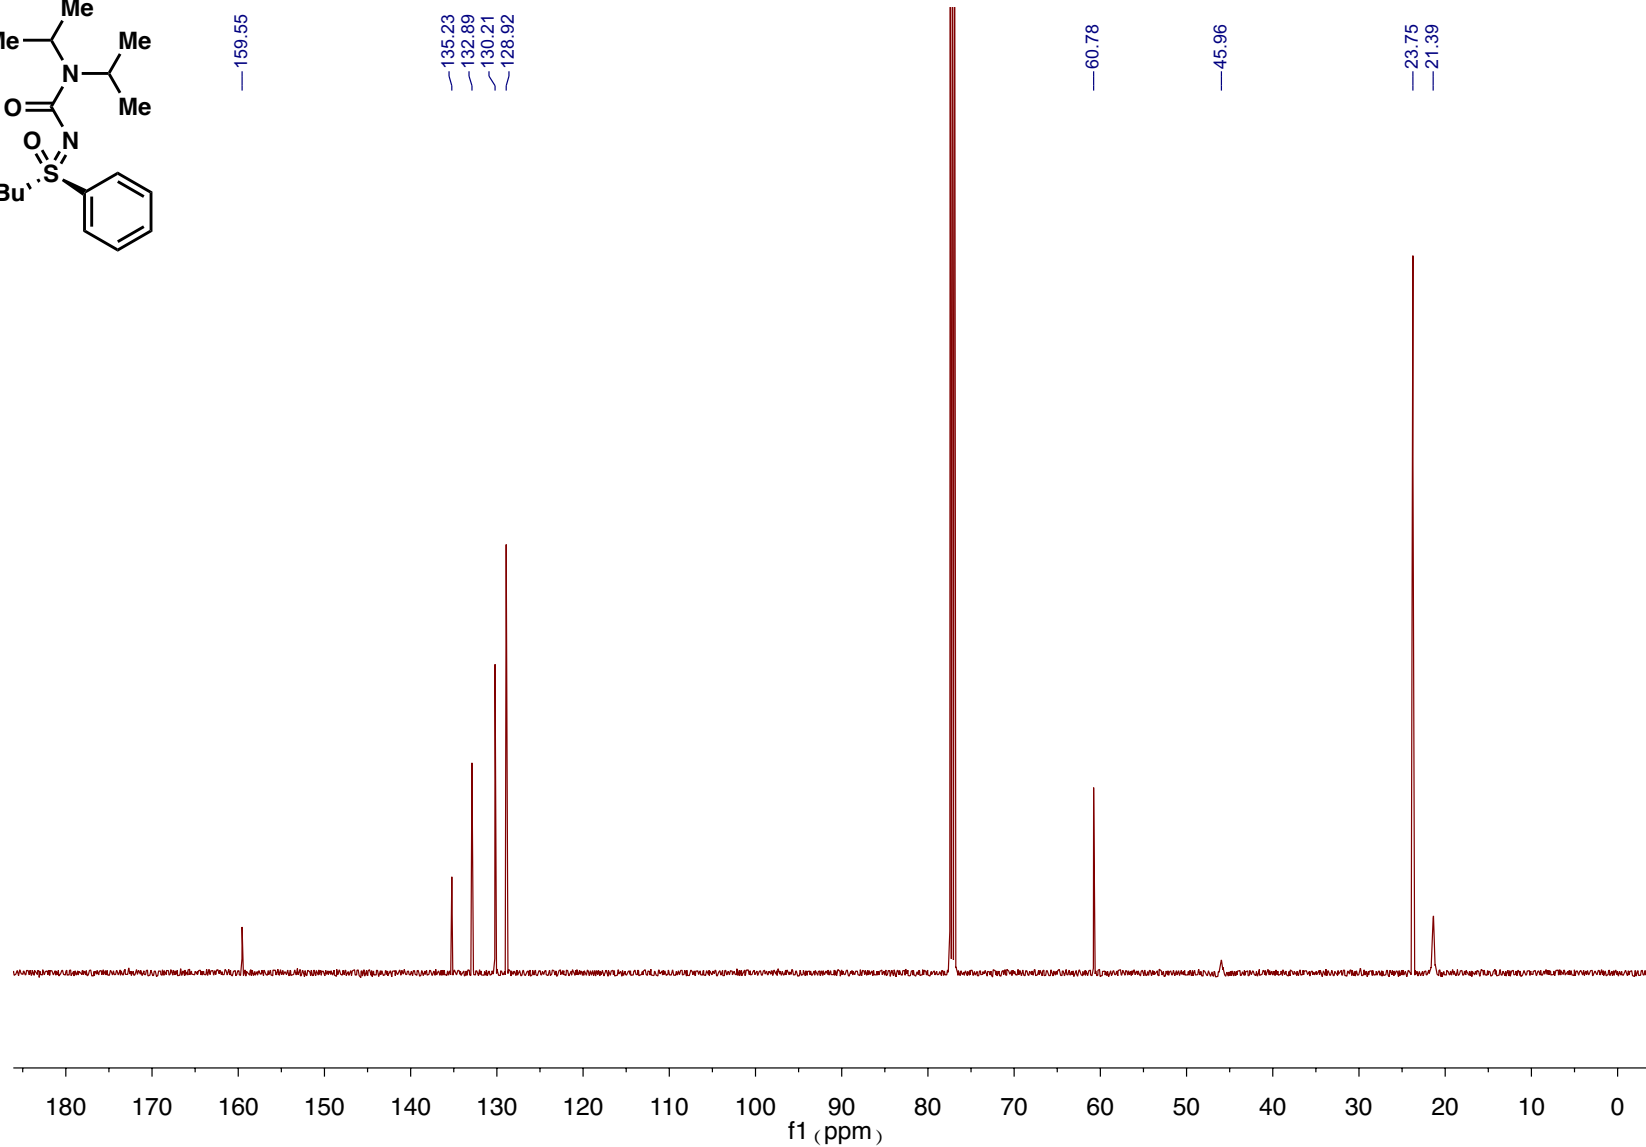

**<sup>1</sup>H NMR of compound 2b:**

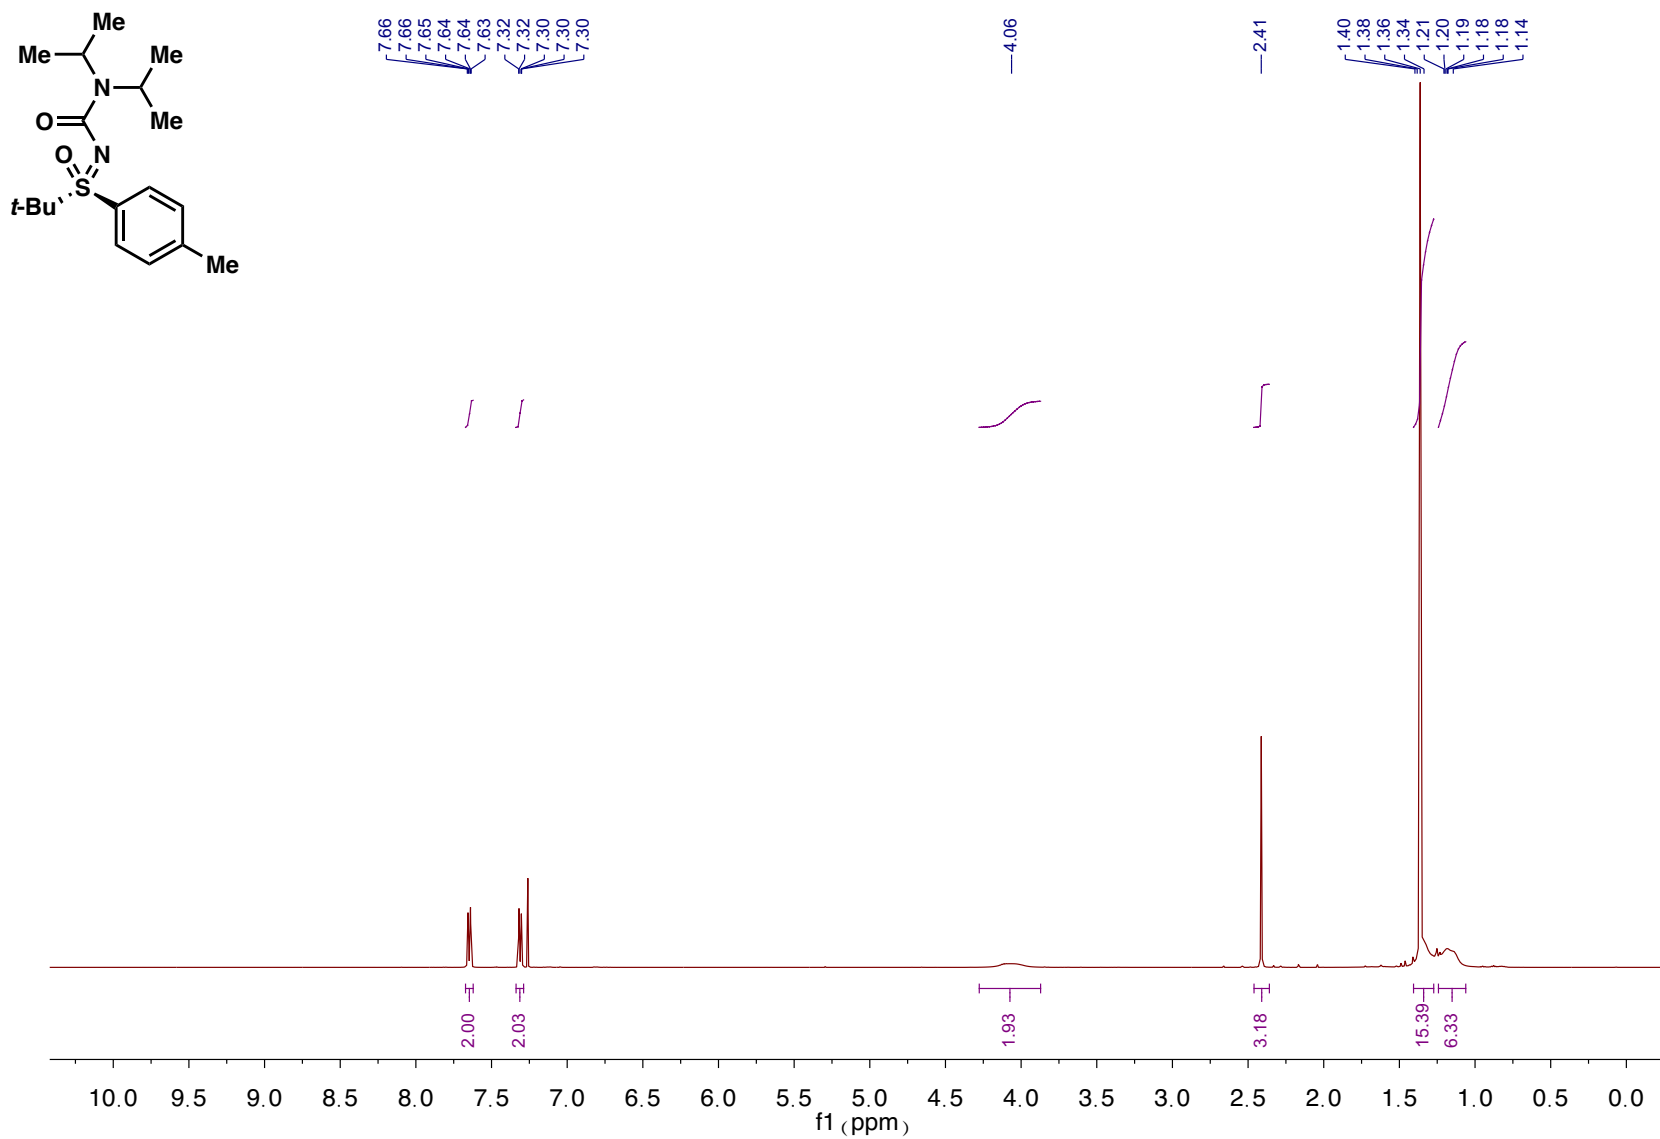

**$^{13}\text{C}$  NMR of compound 2b:**

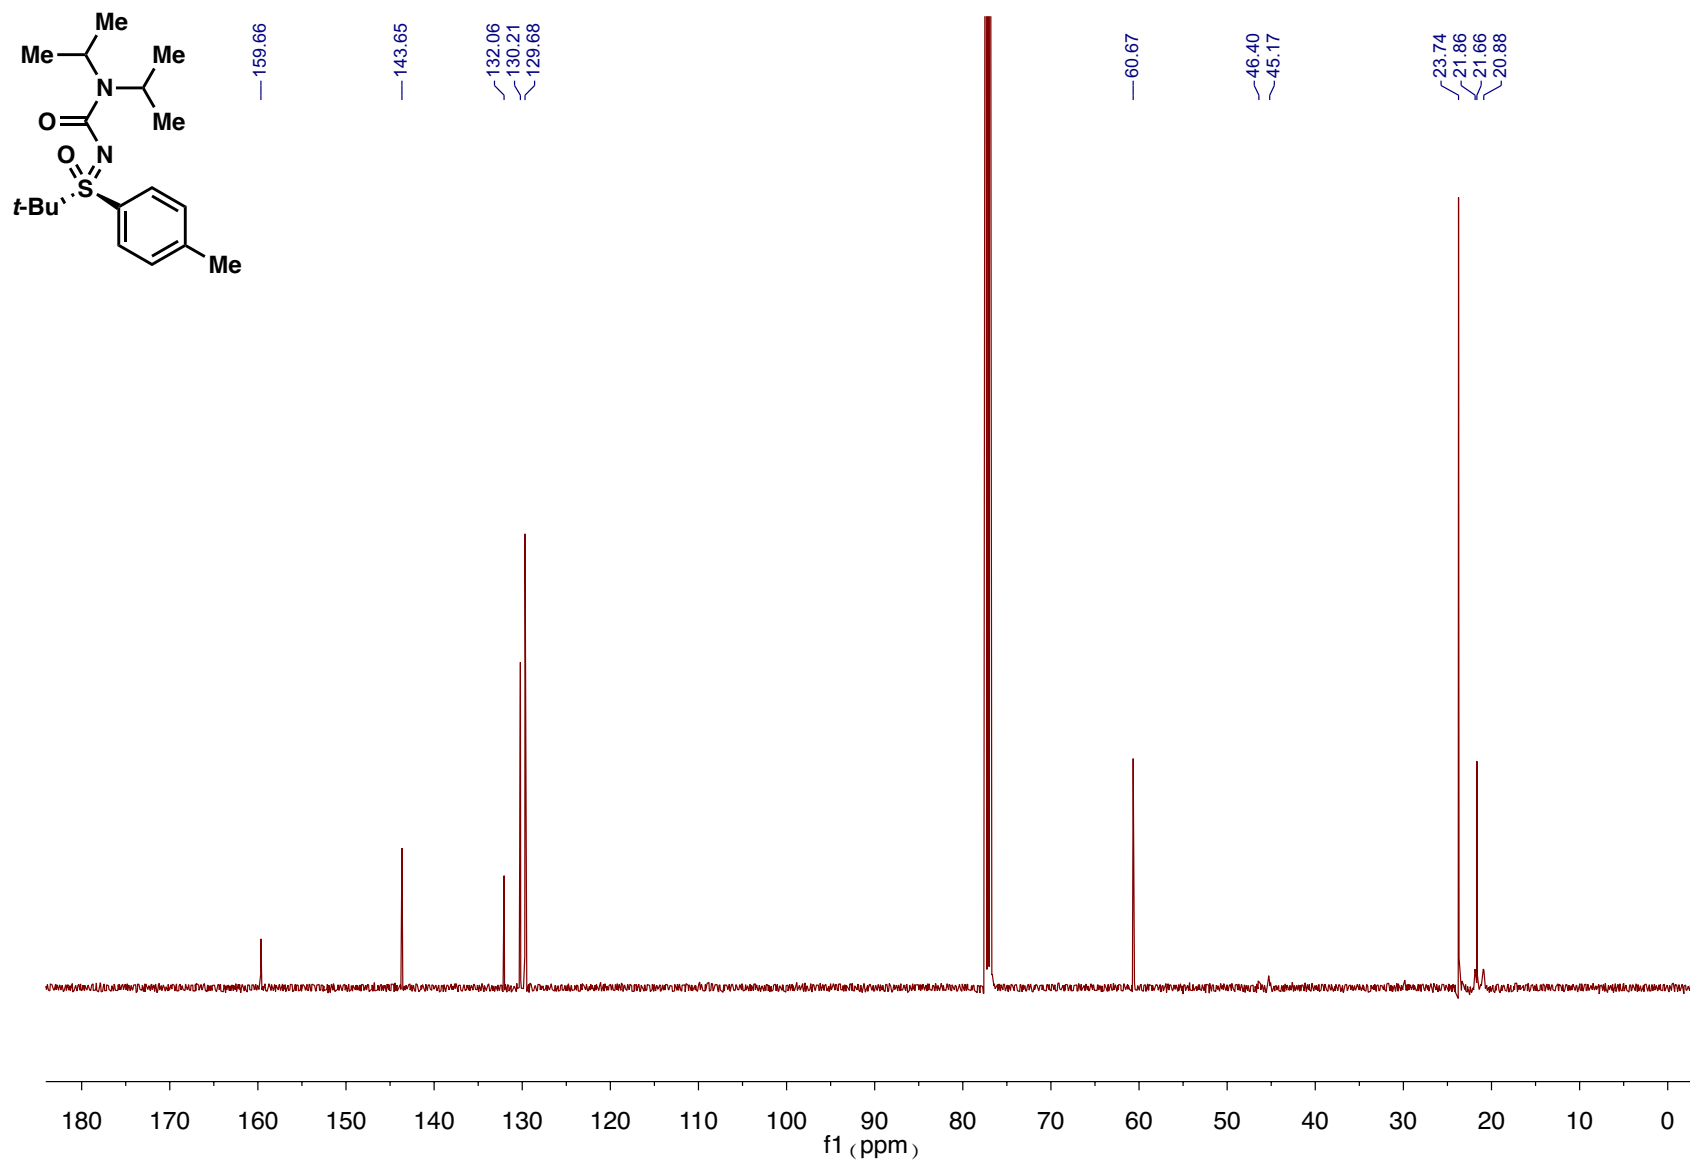

**<sup>1</sup>H NMR of compound 2c:**

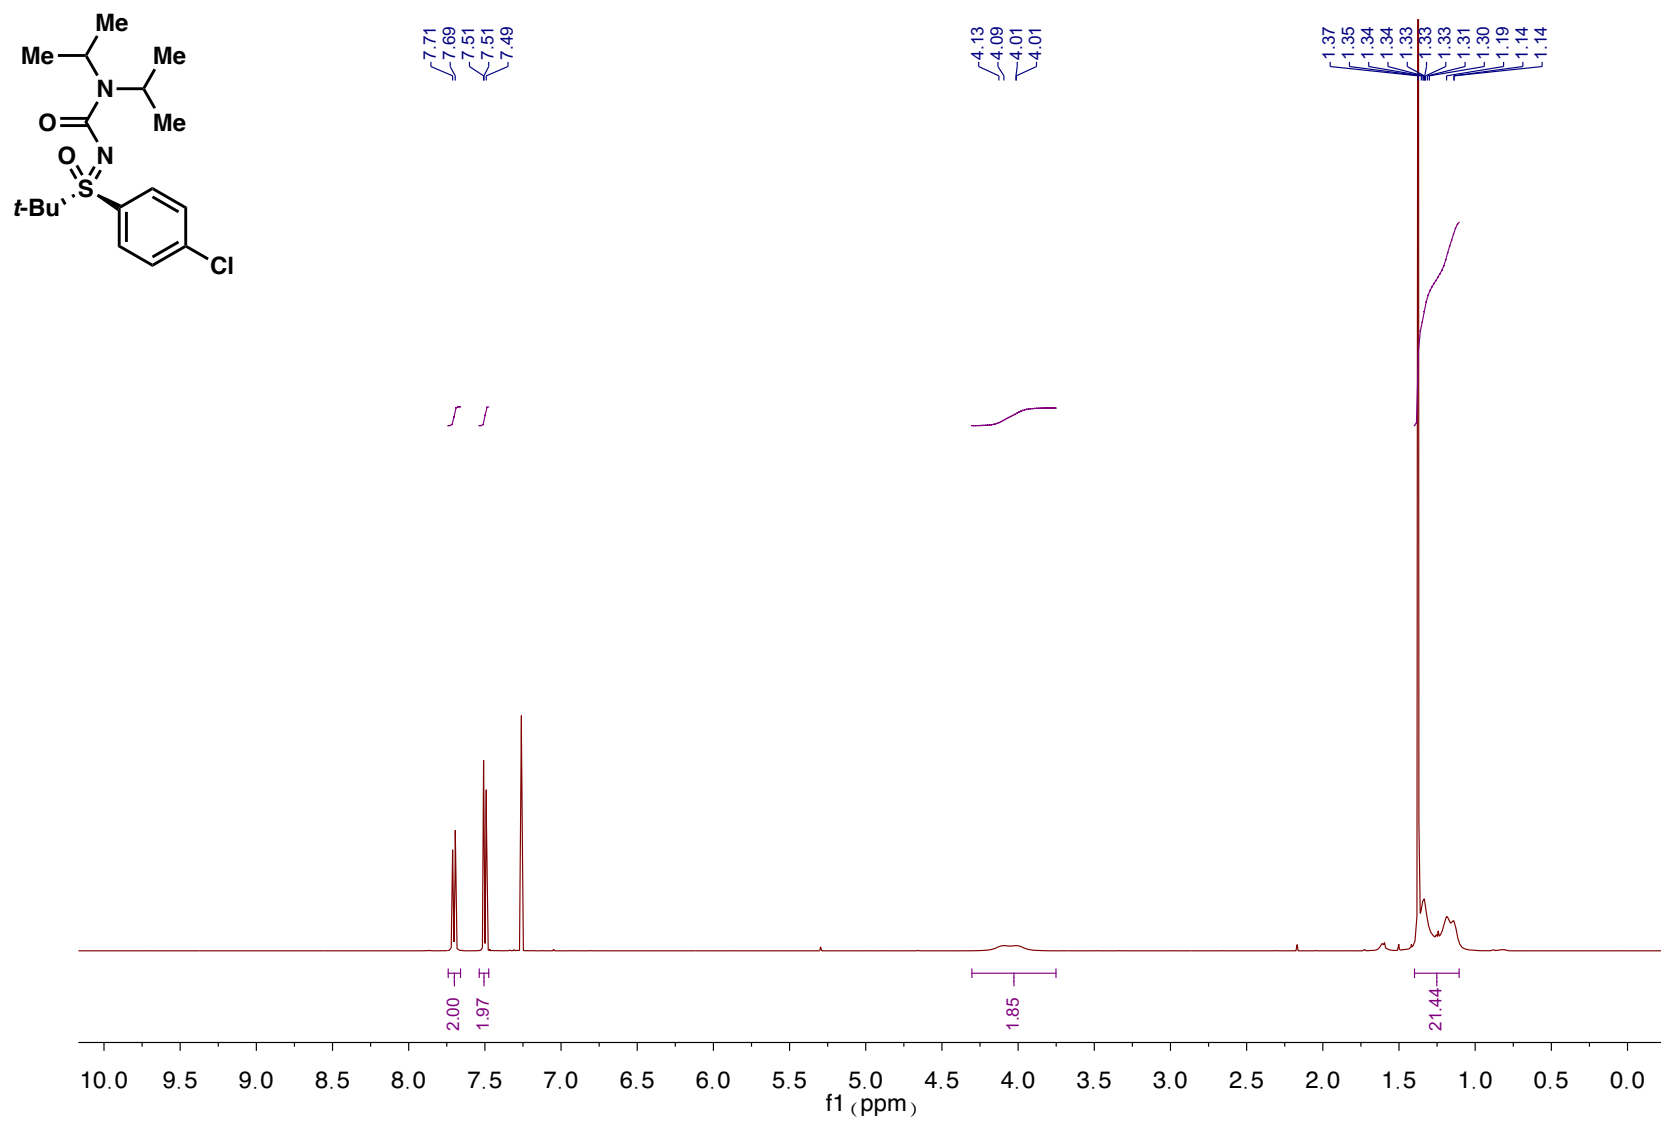

**$^{13}\text{C}$  NMR of compound 2c:**

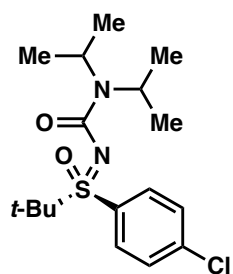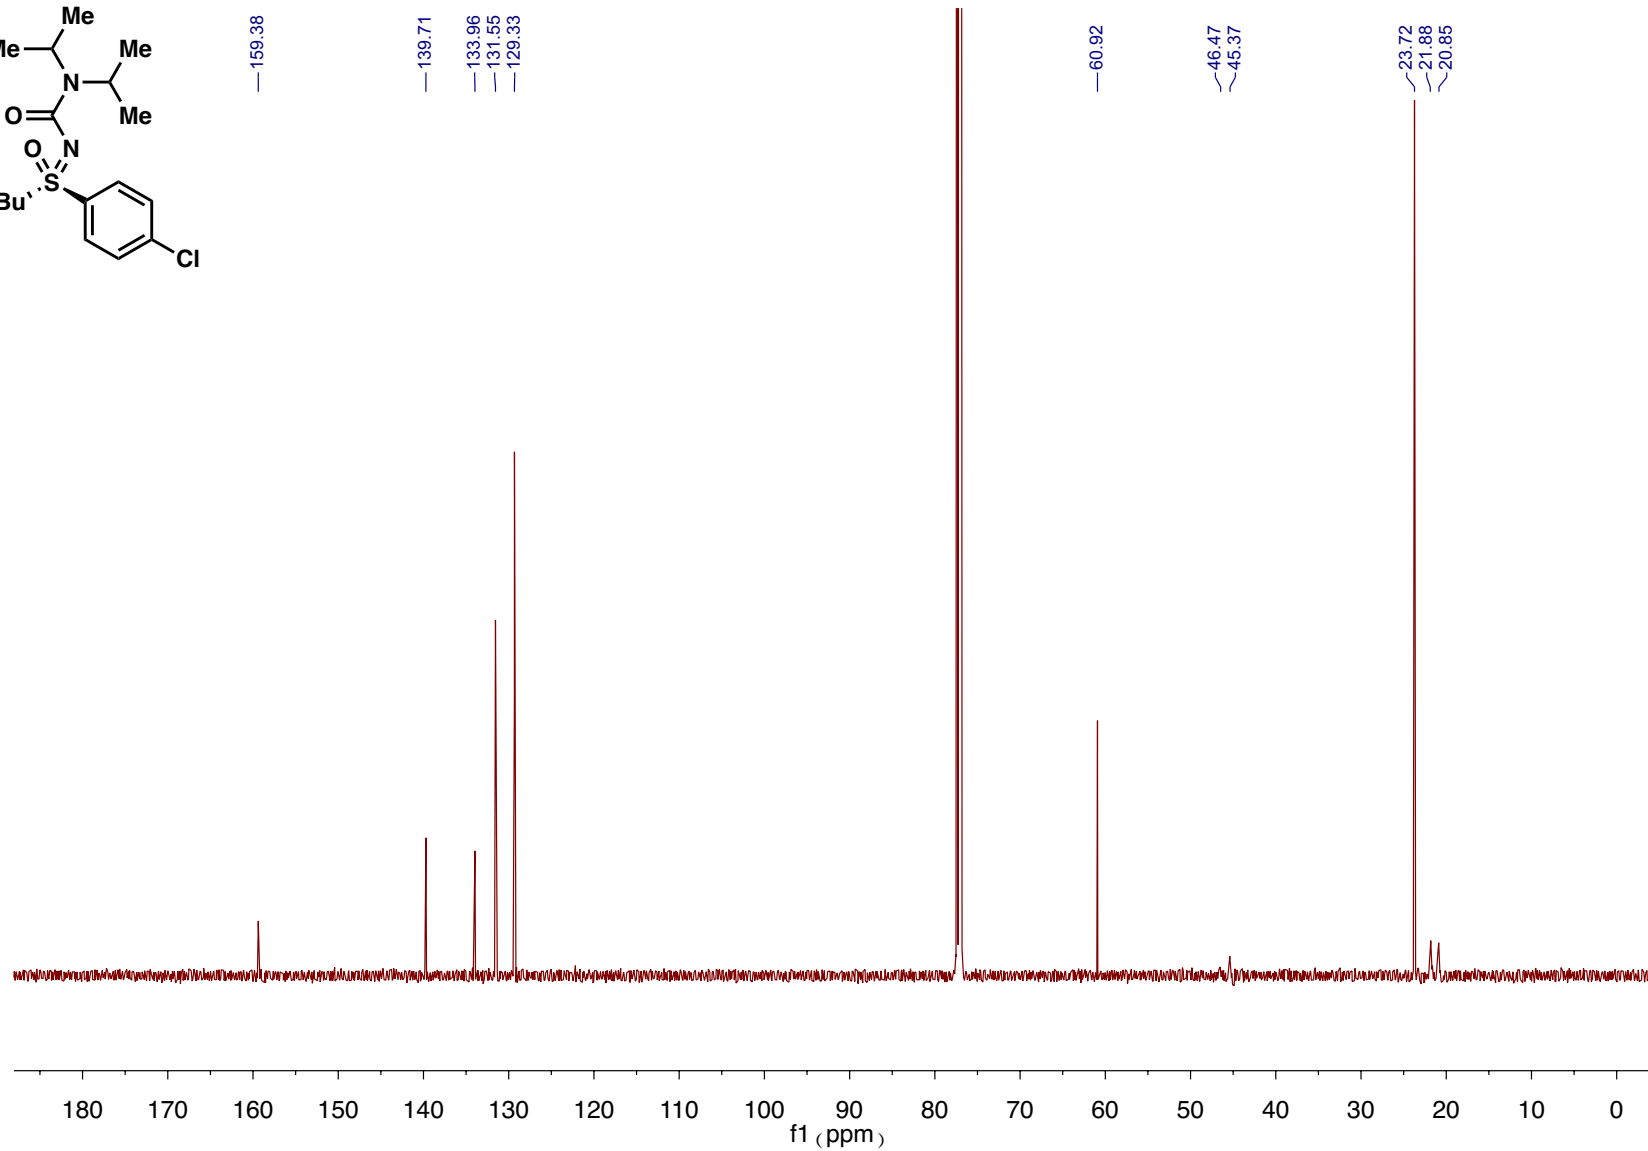

**<sup>1</sup>H NMR of compound 2d:**

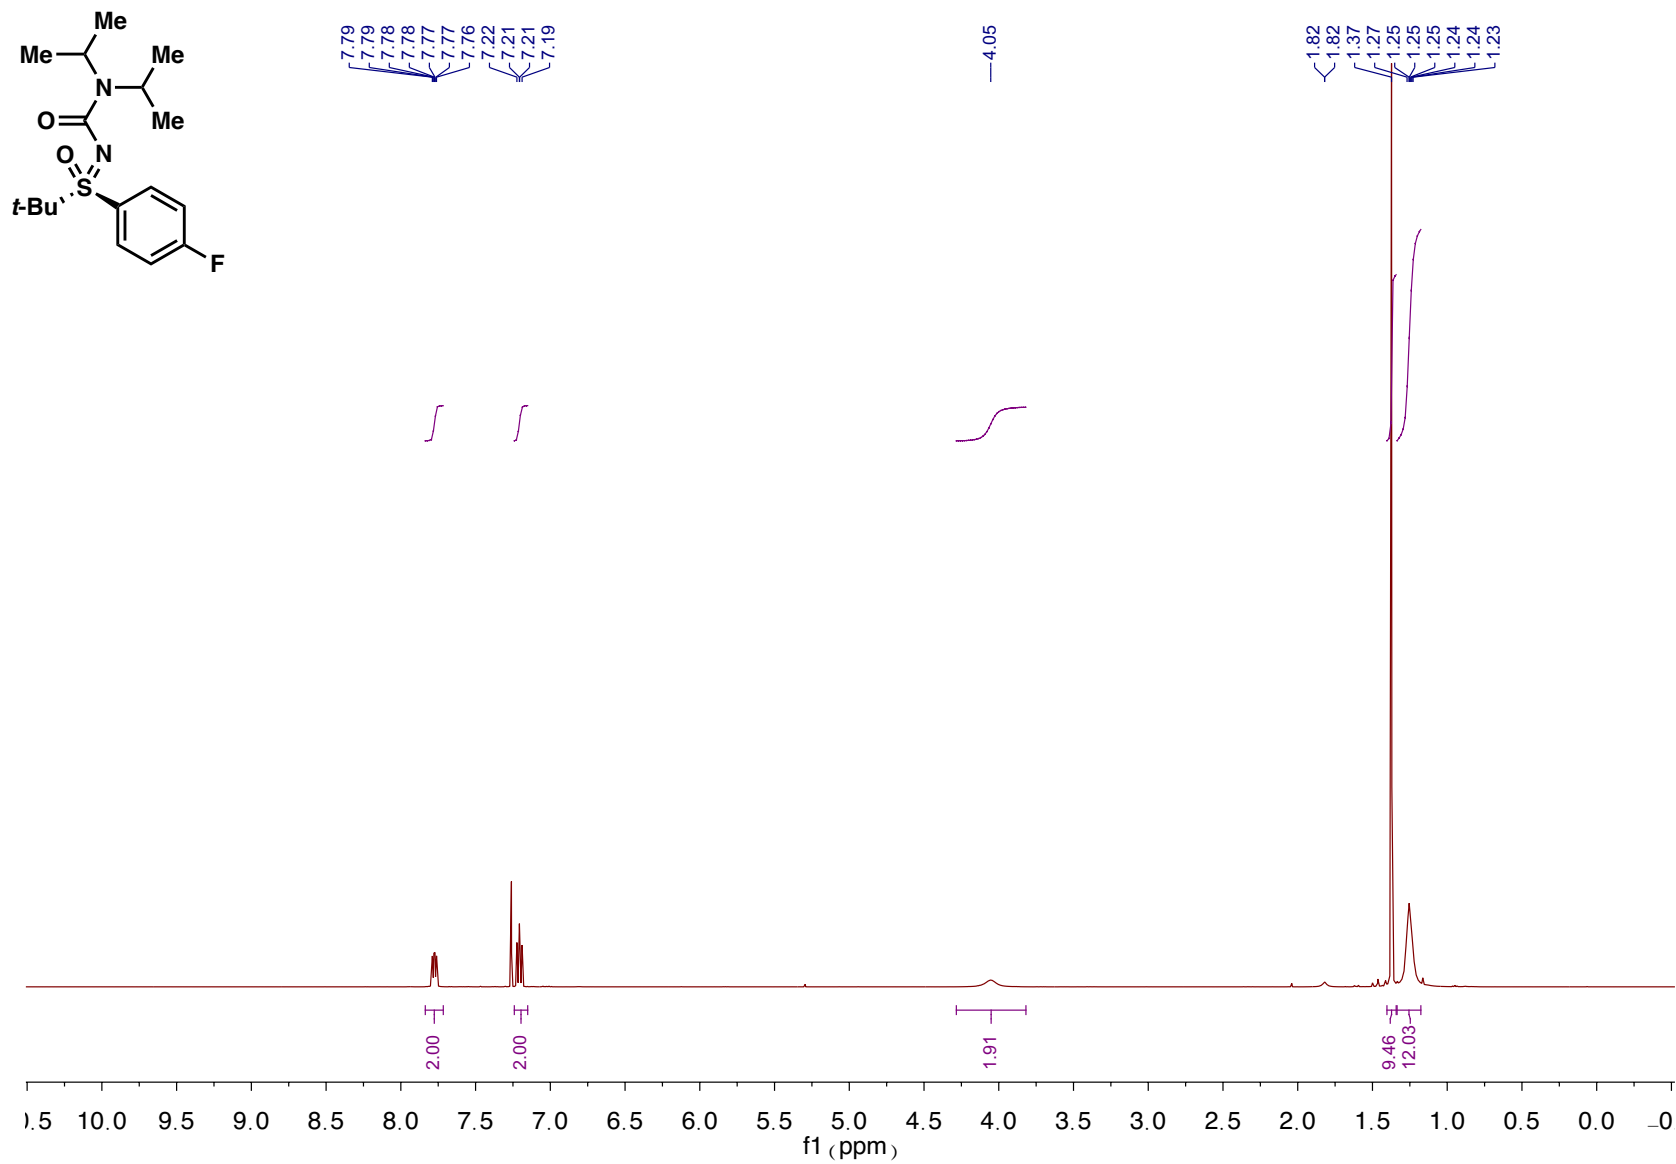

**$^{13}\text{C}$  NMR of compound 2d:**

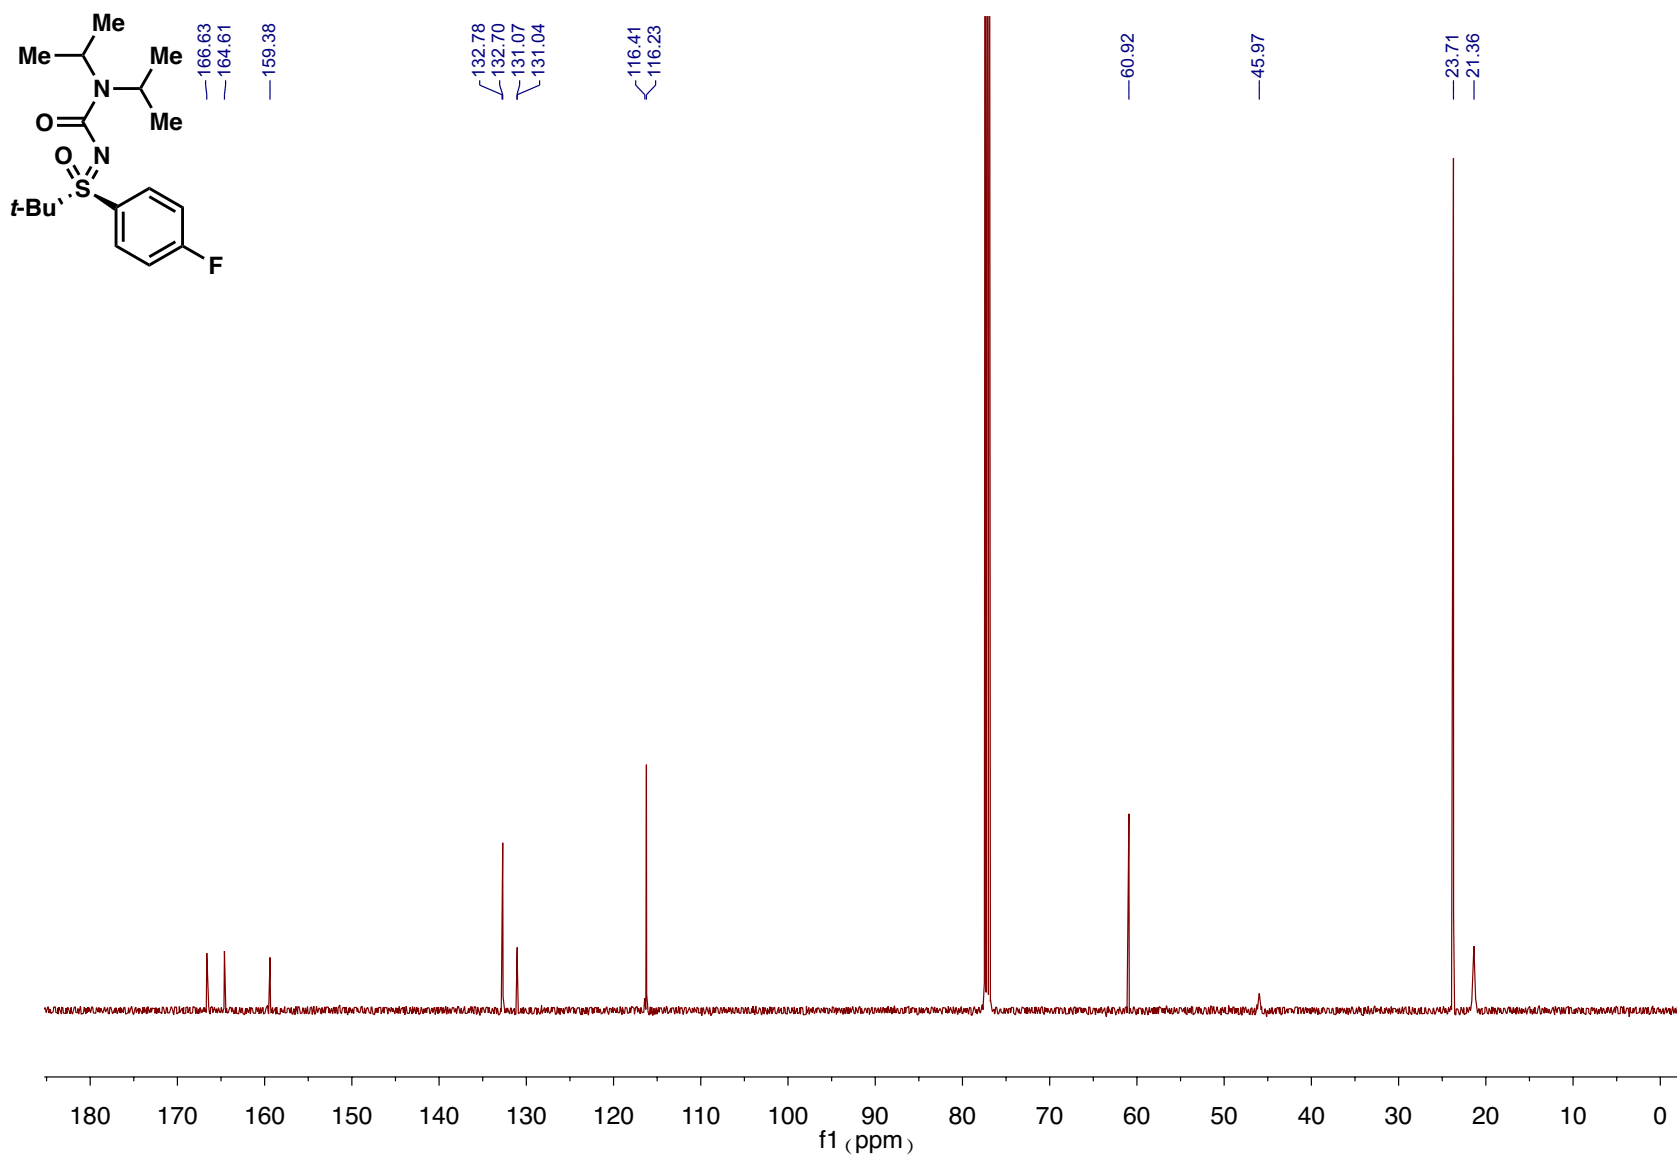

**$^{19}\text{F}$  NMR of compound 2d:**

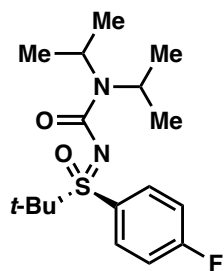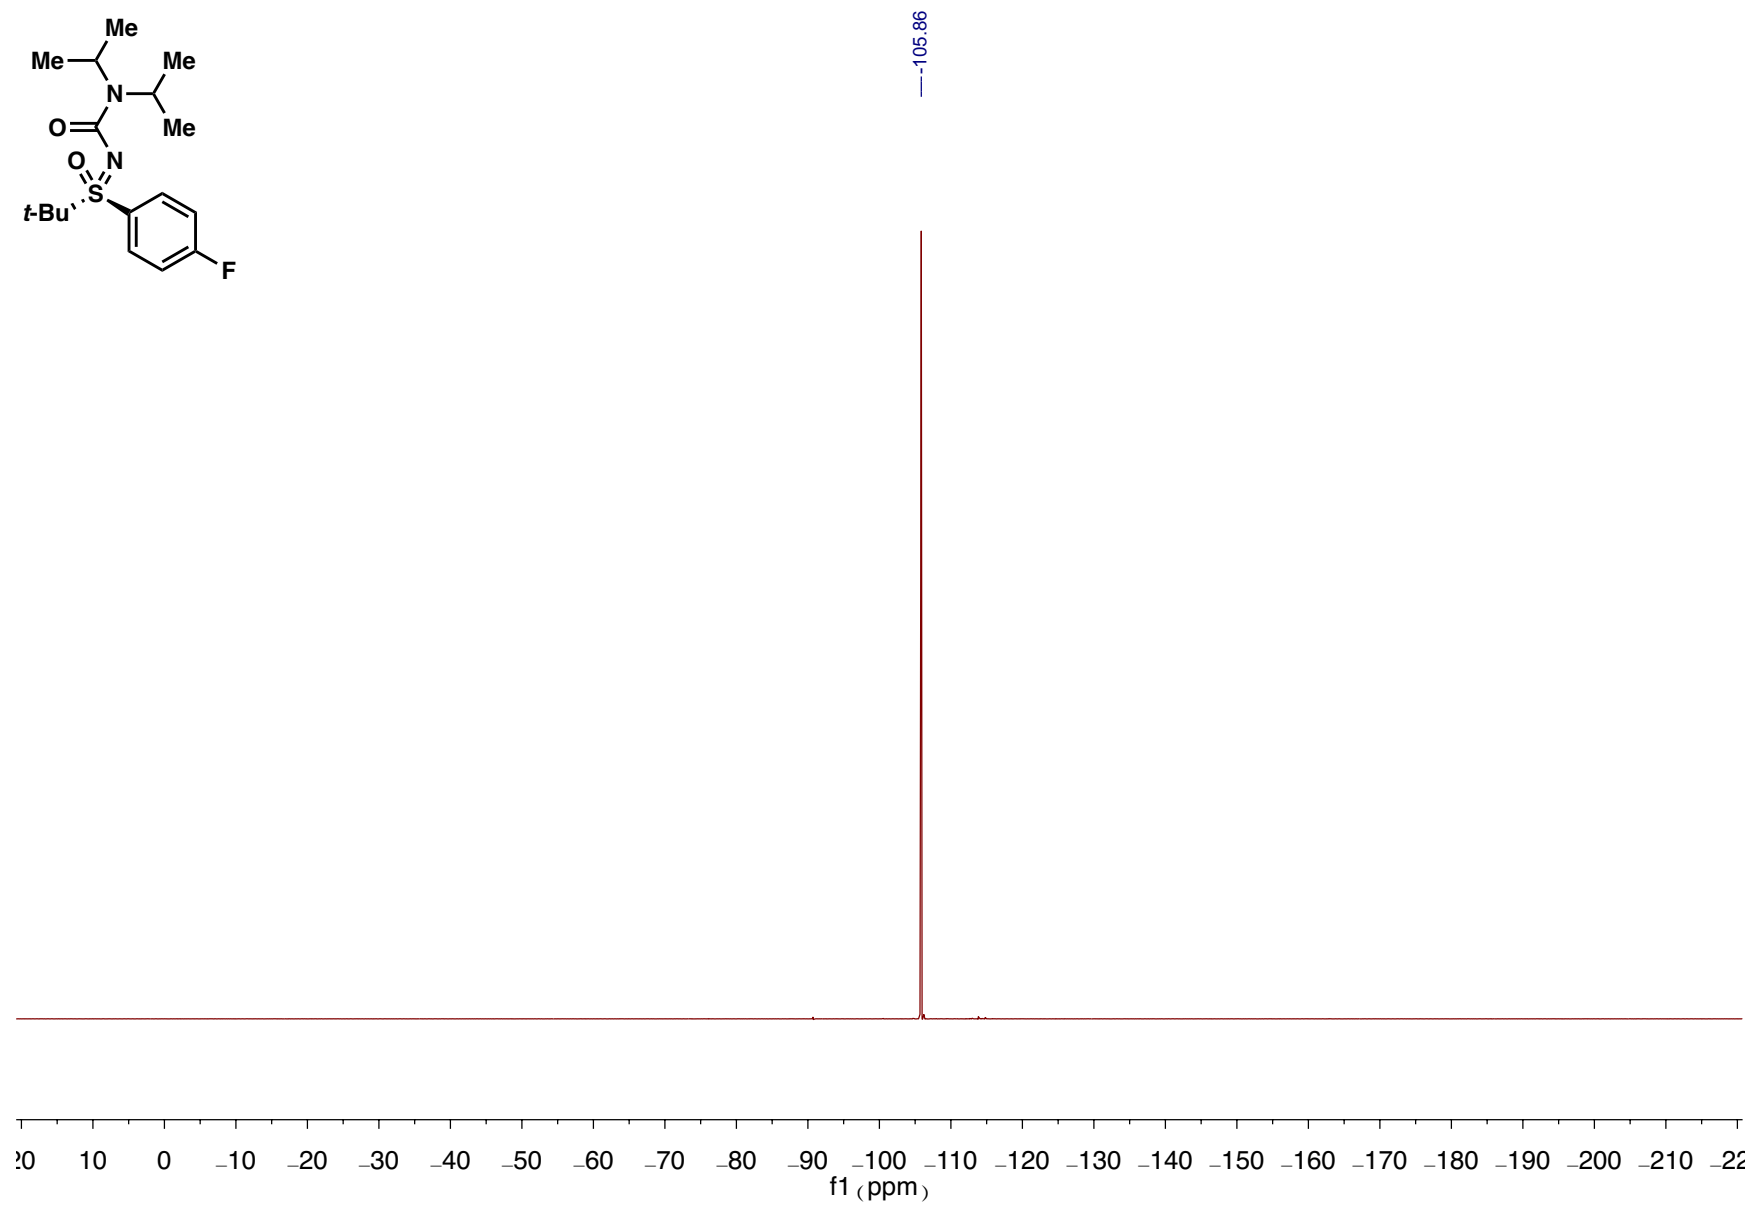

**<sup>1</sup>H NMR of compound 2e:**

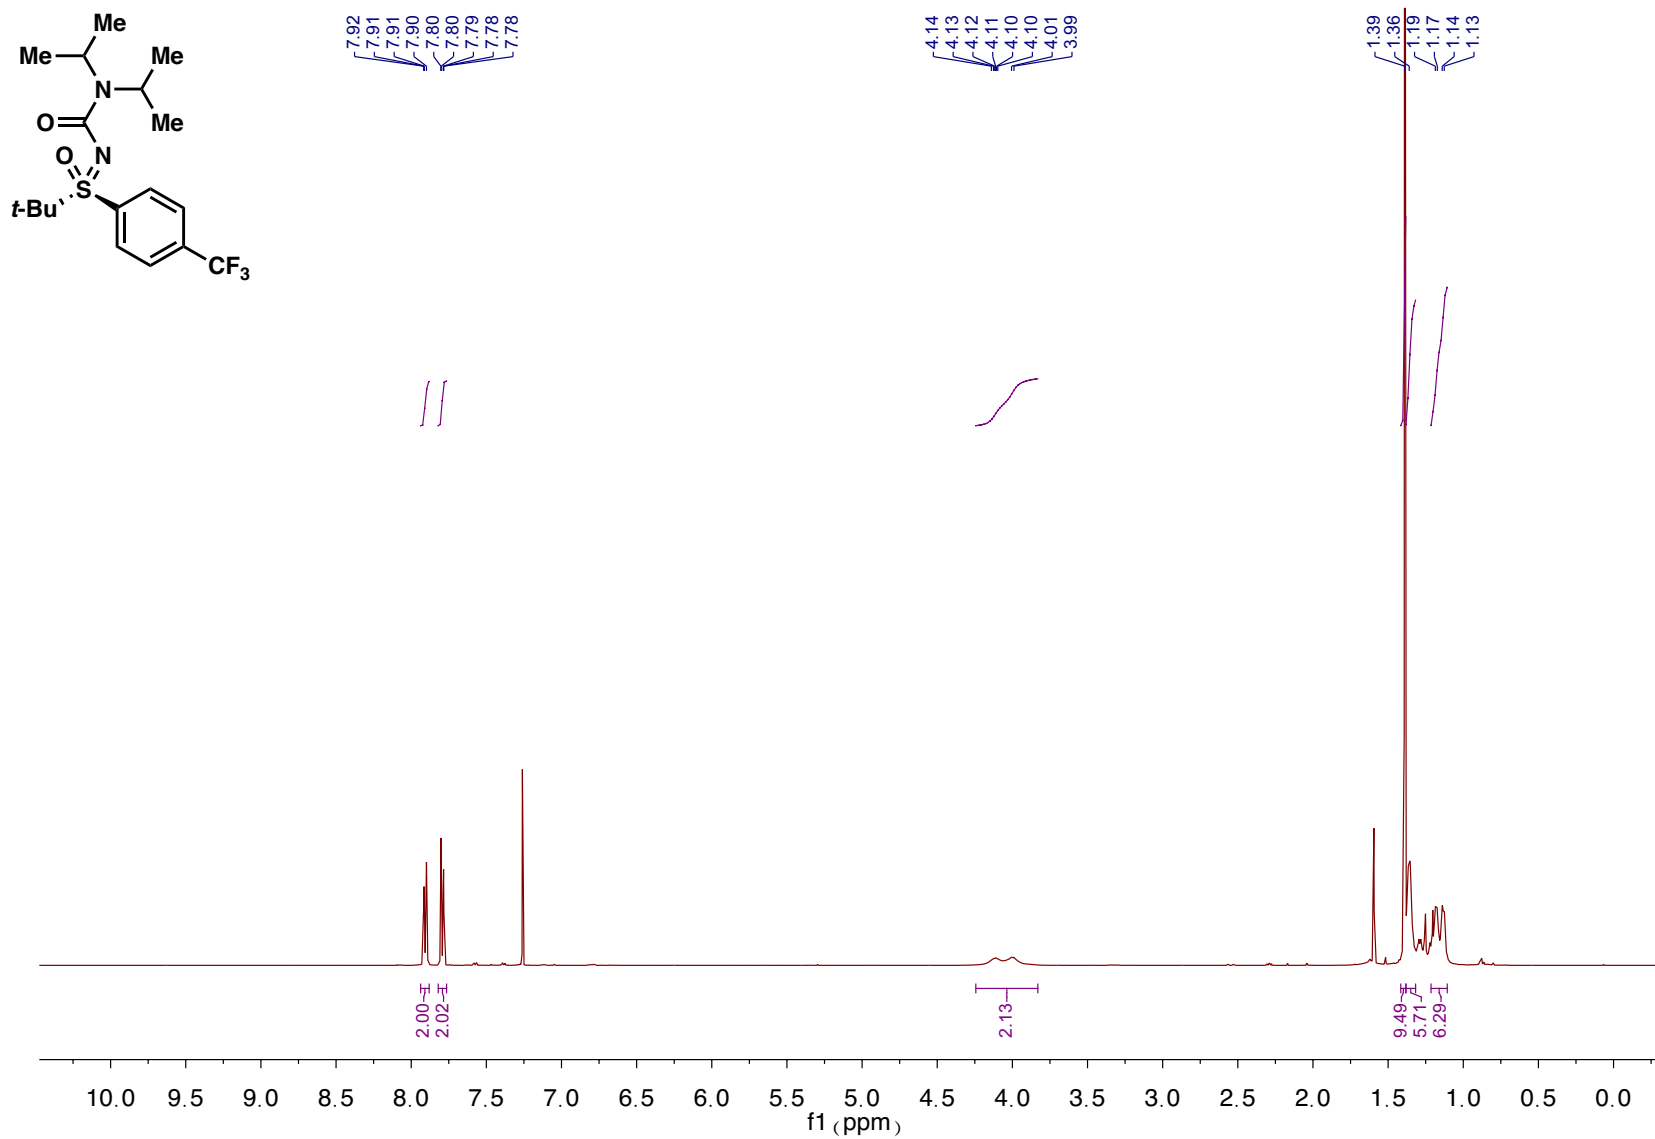

**<sup>13</sup>C NMR of compound 2e:**

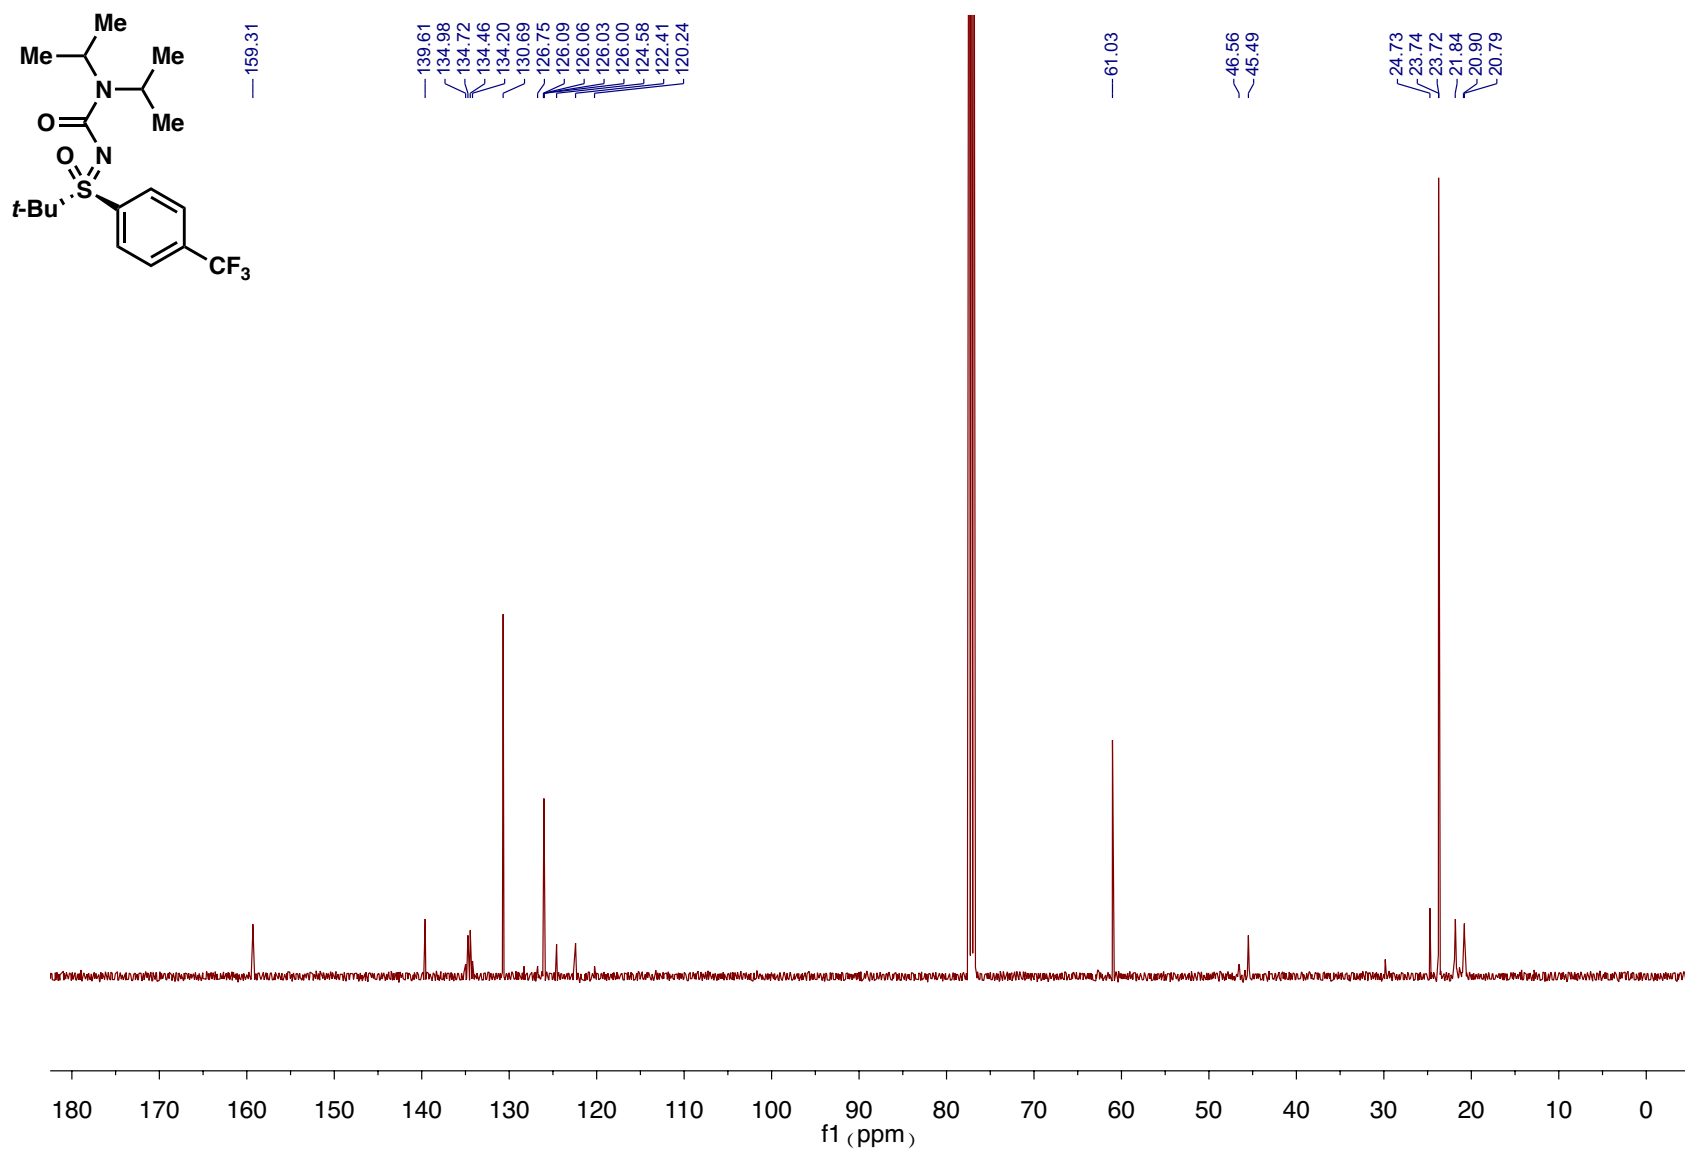

**$^{19}\text{F}$  NMR of compound 2e:**

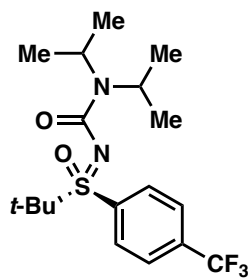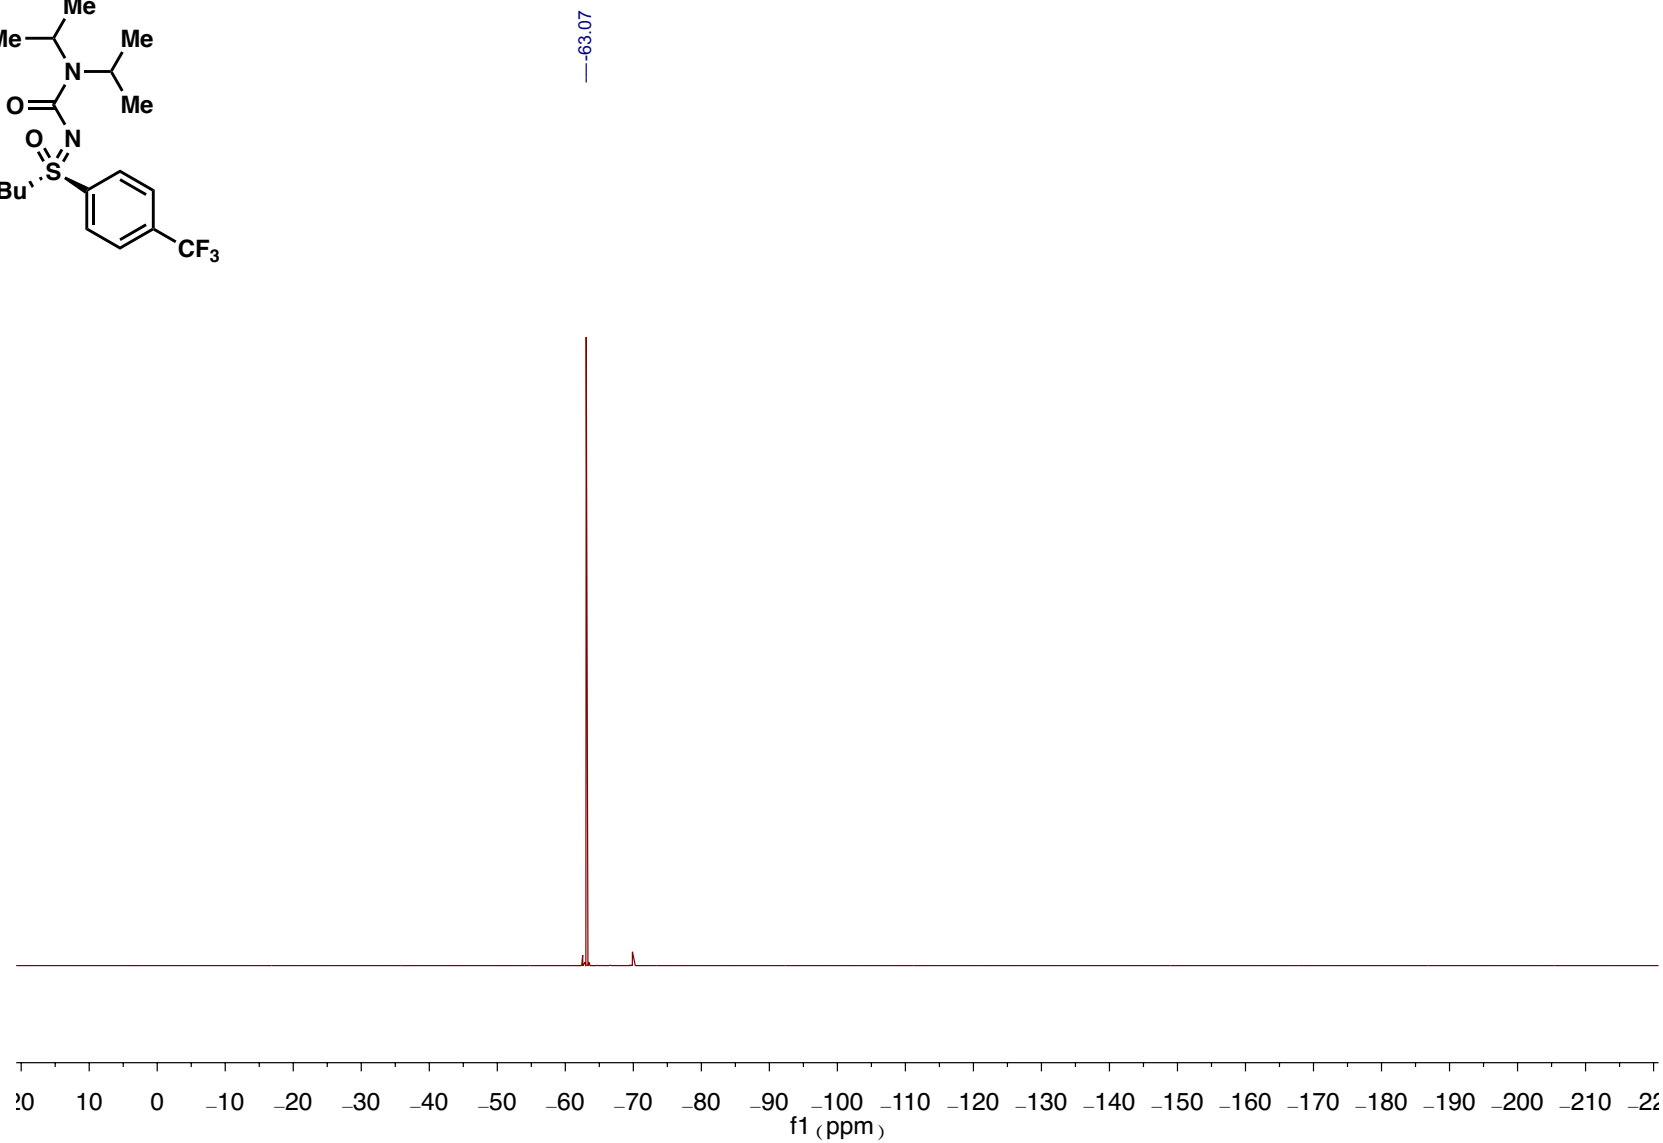

**<sup>1</sup>H NMR of compound 2f:**

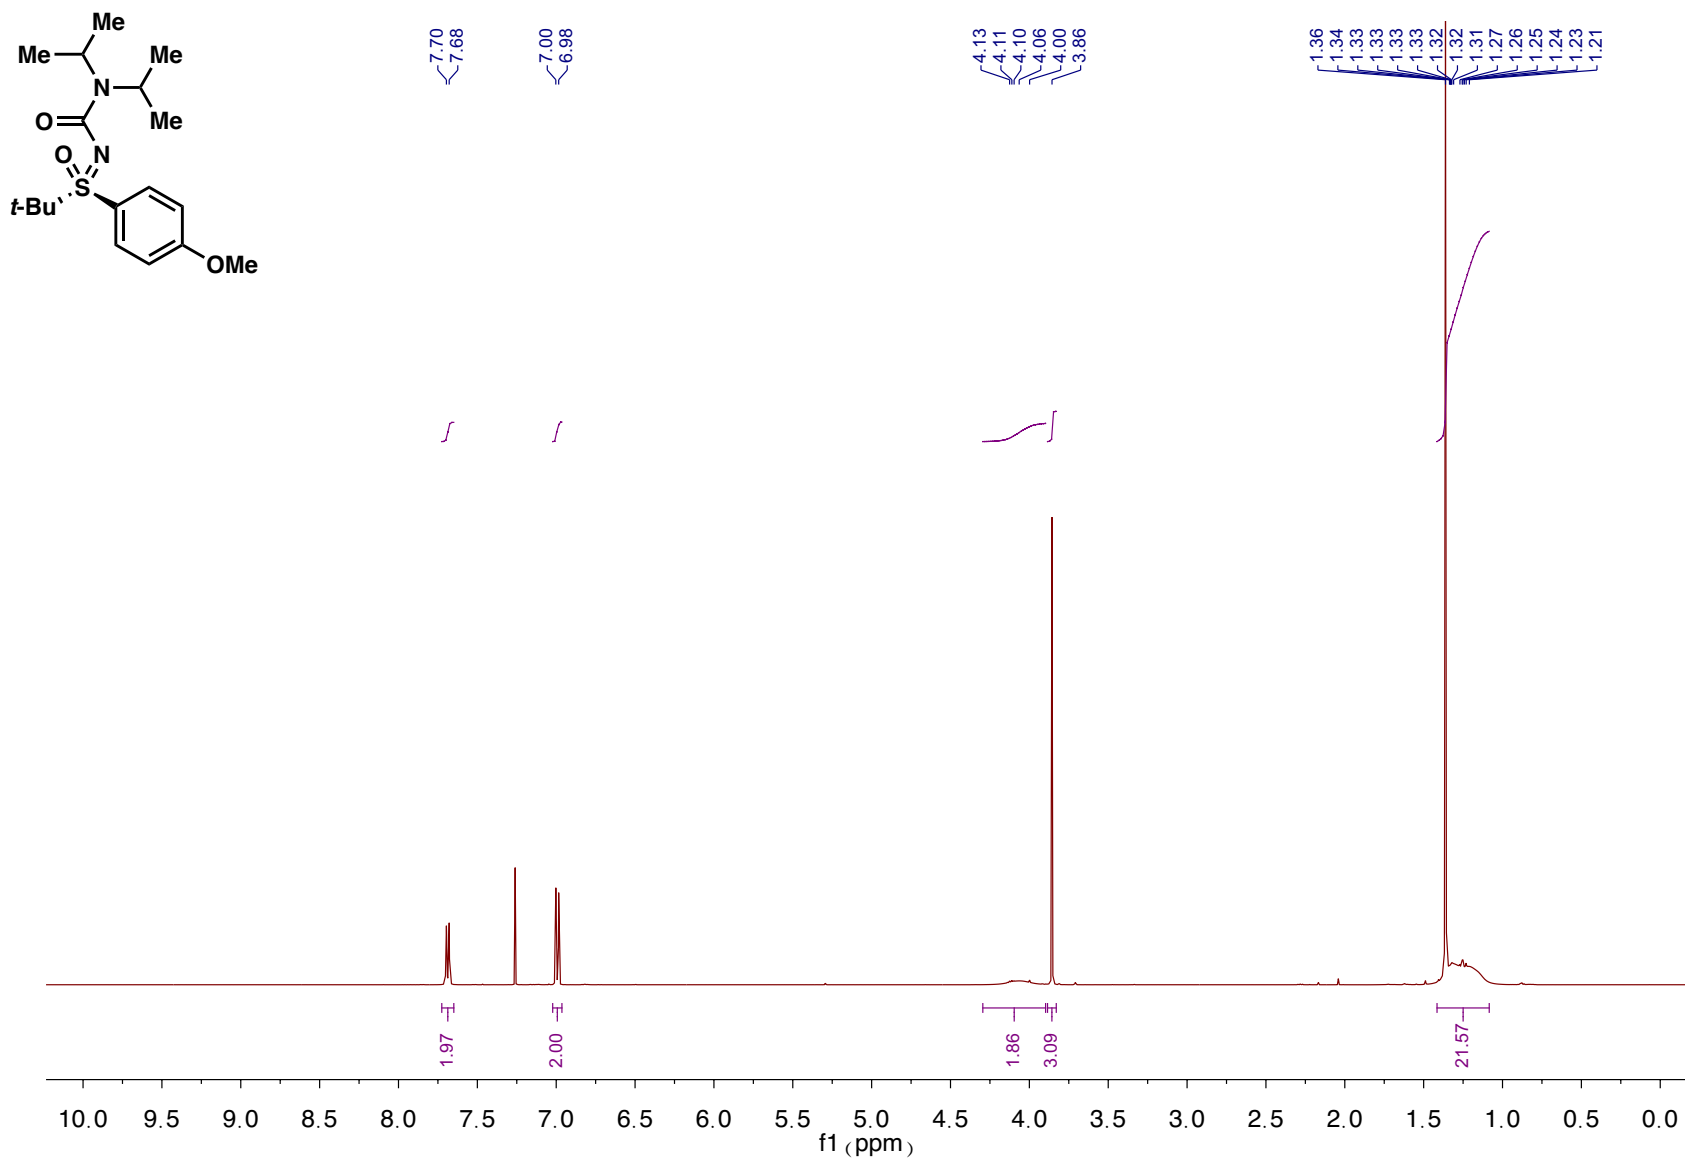

**<sup>13</sup>C NMR of compound 2f:**

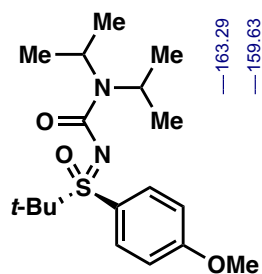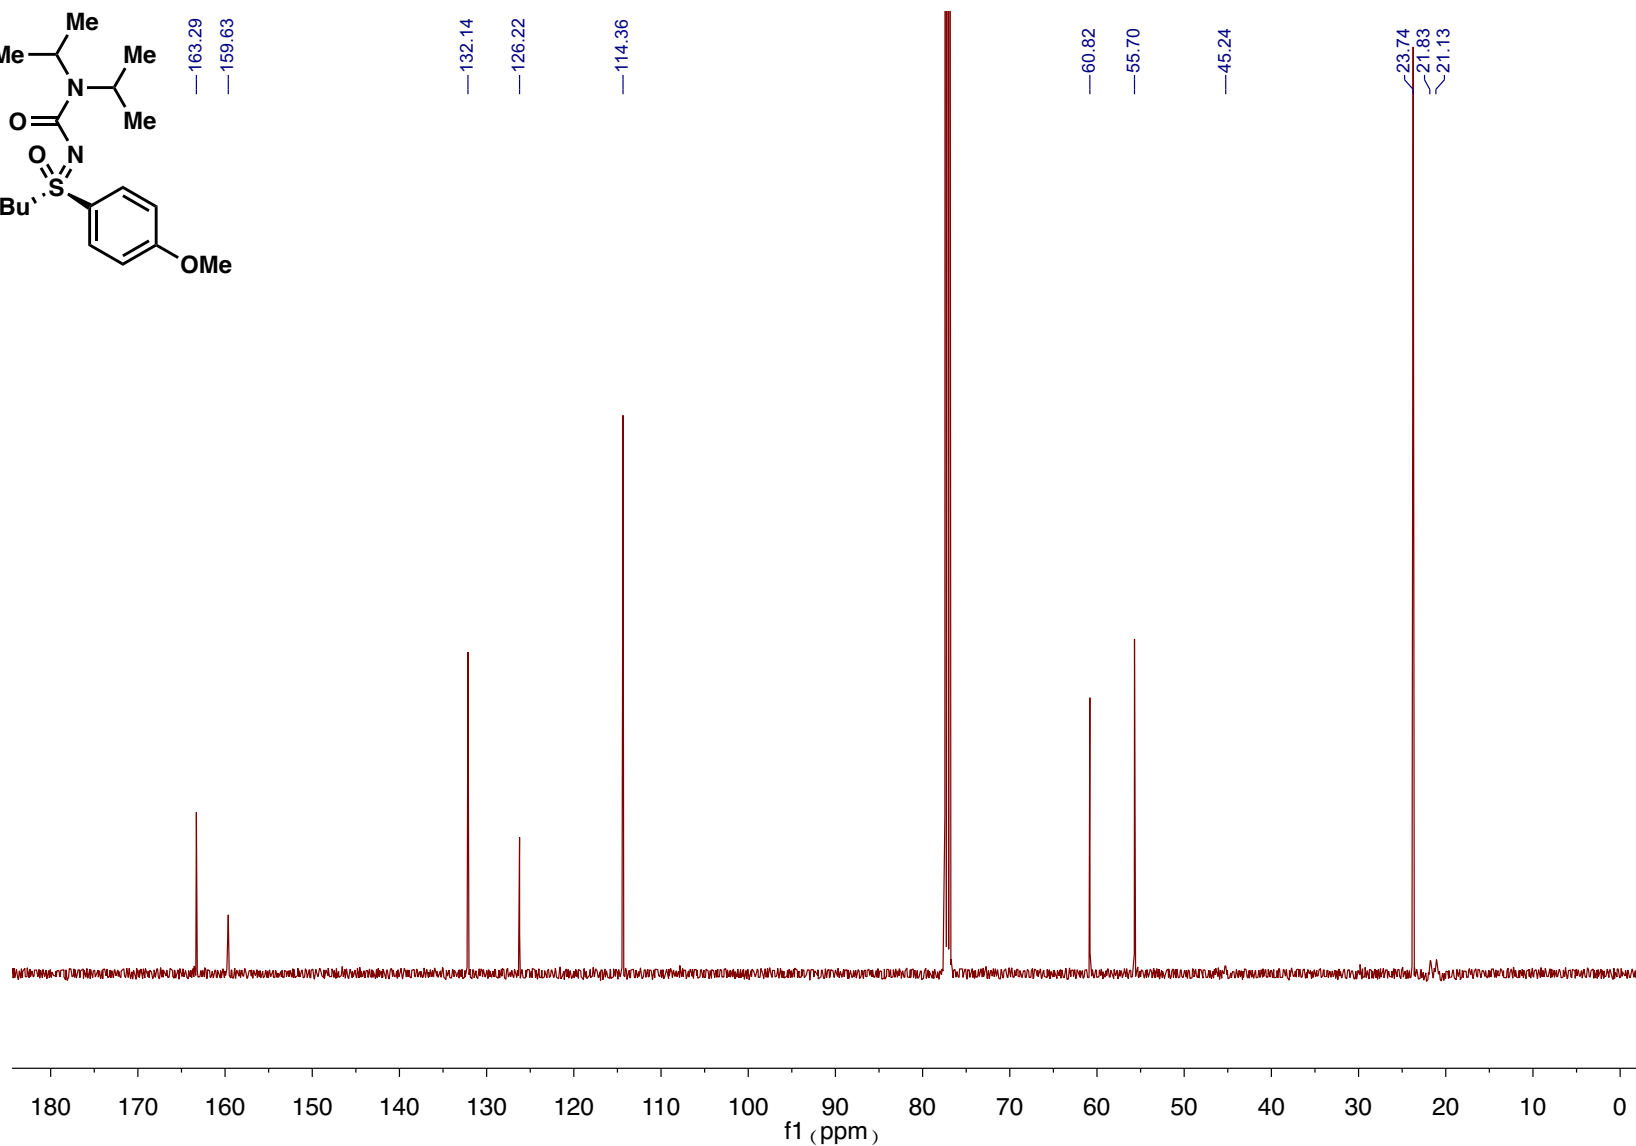

**<sup>1</sup>H NMR of compound 2g:**

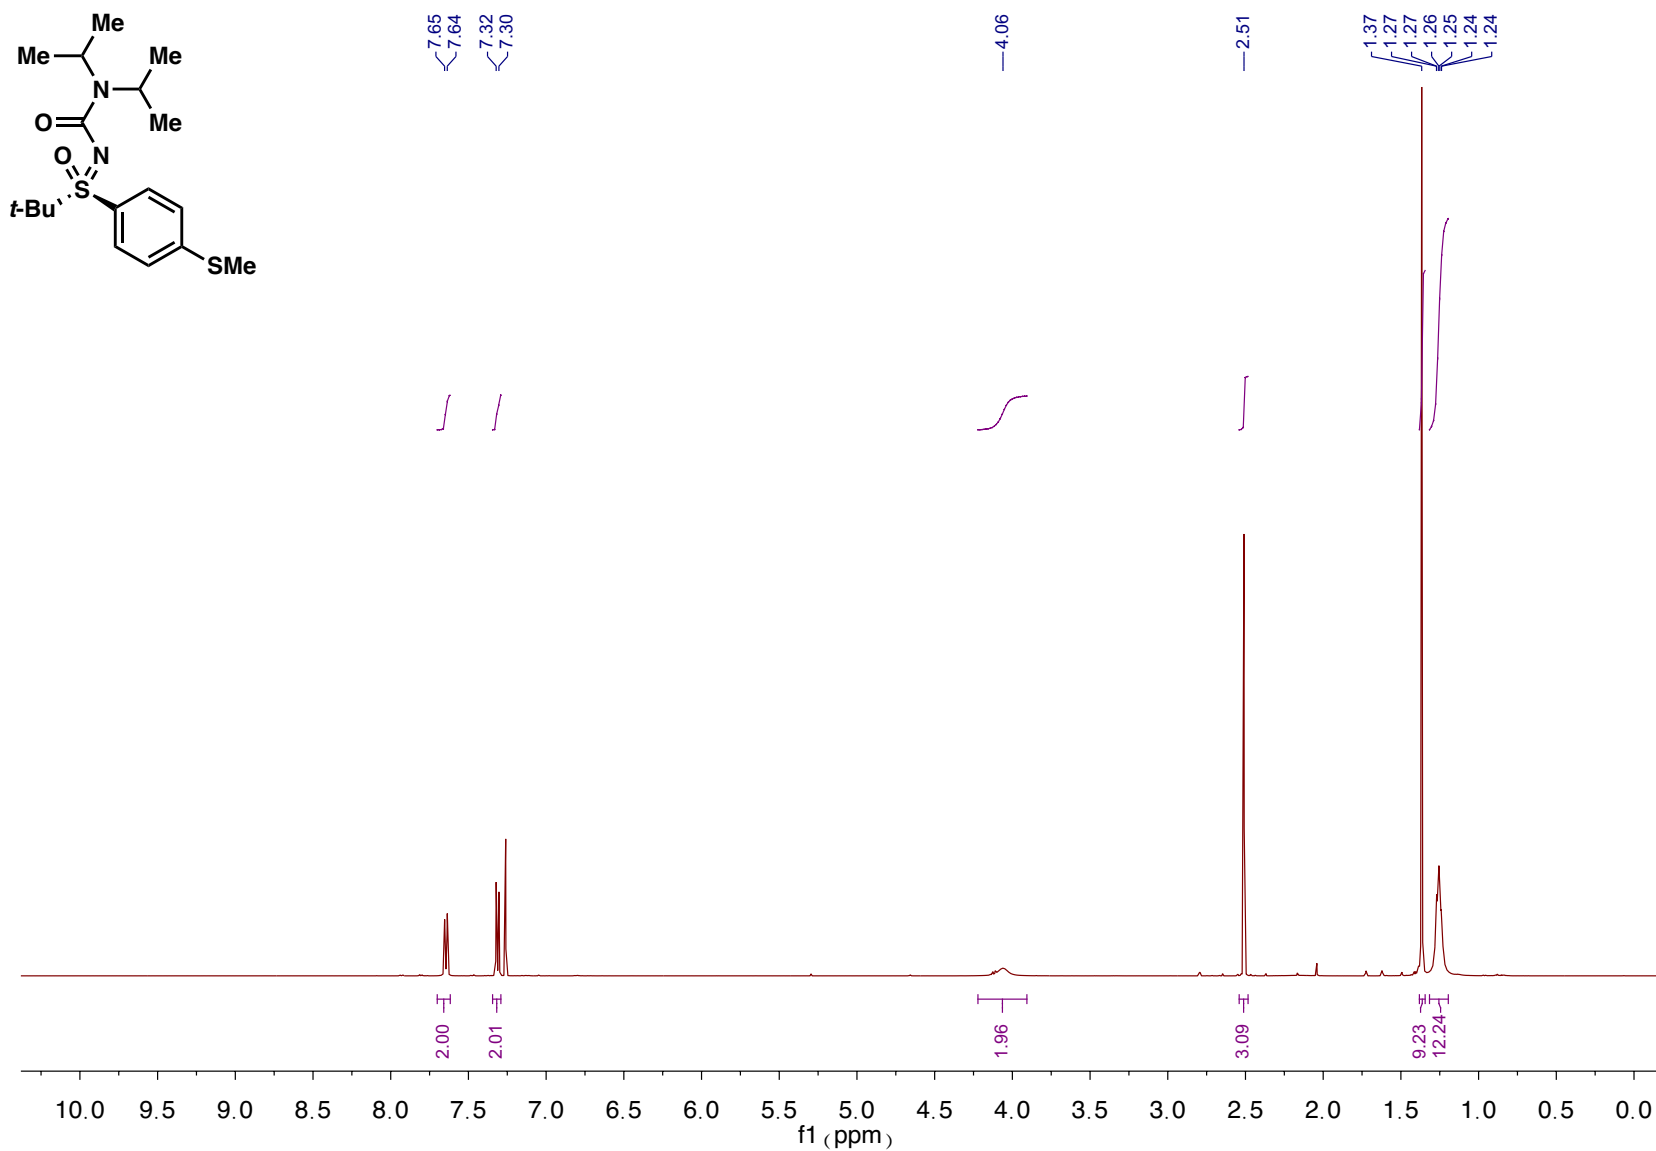

**$^{13}\text{C}$  NMR of compound 2g:**

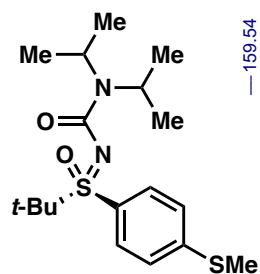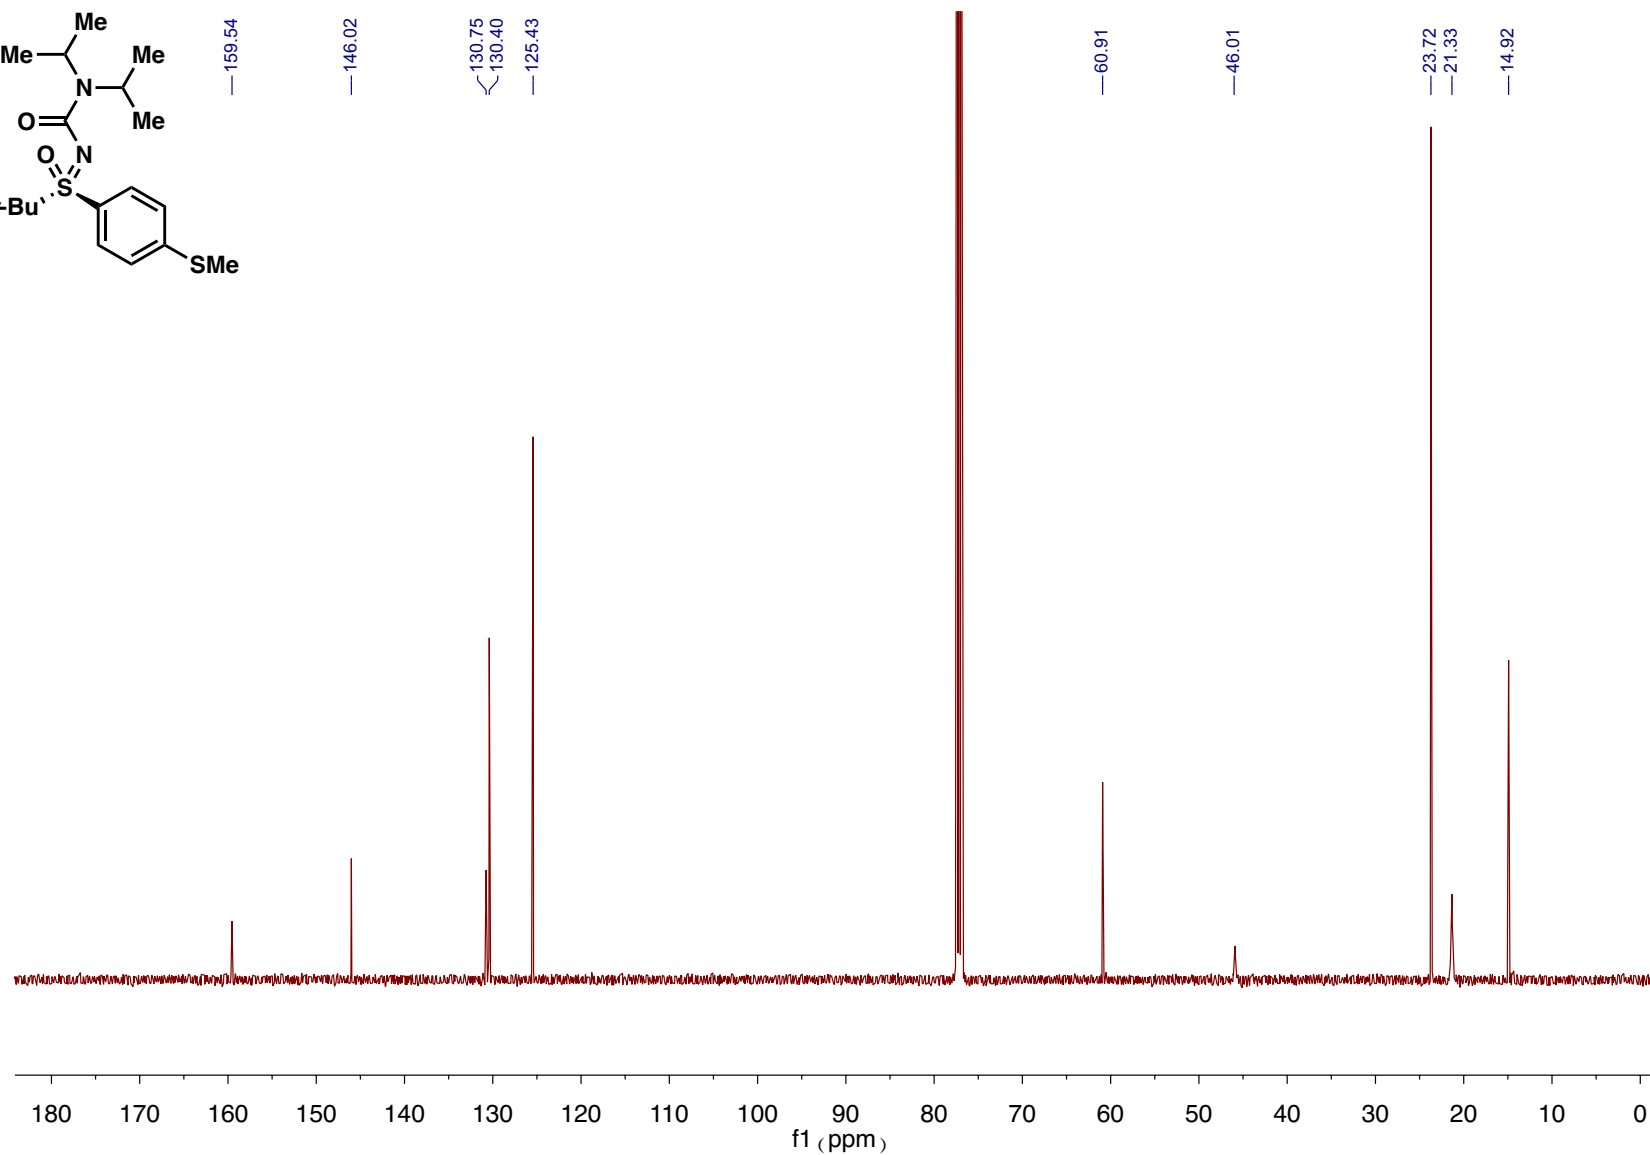

**<sup>1</sup>H NMR of compound 2h:**

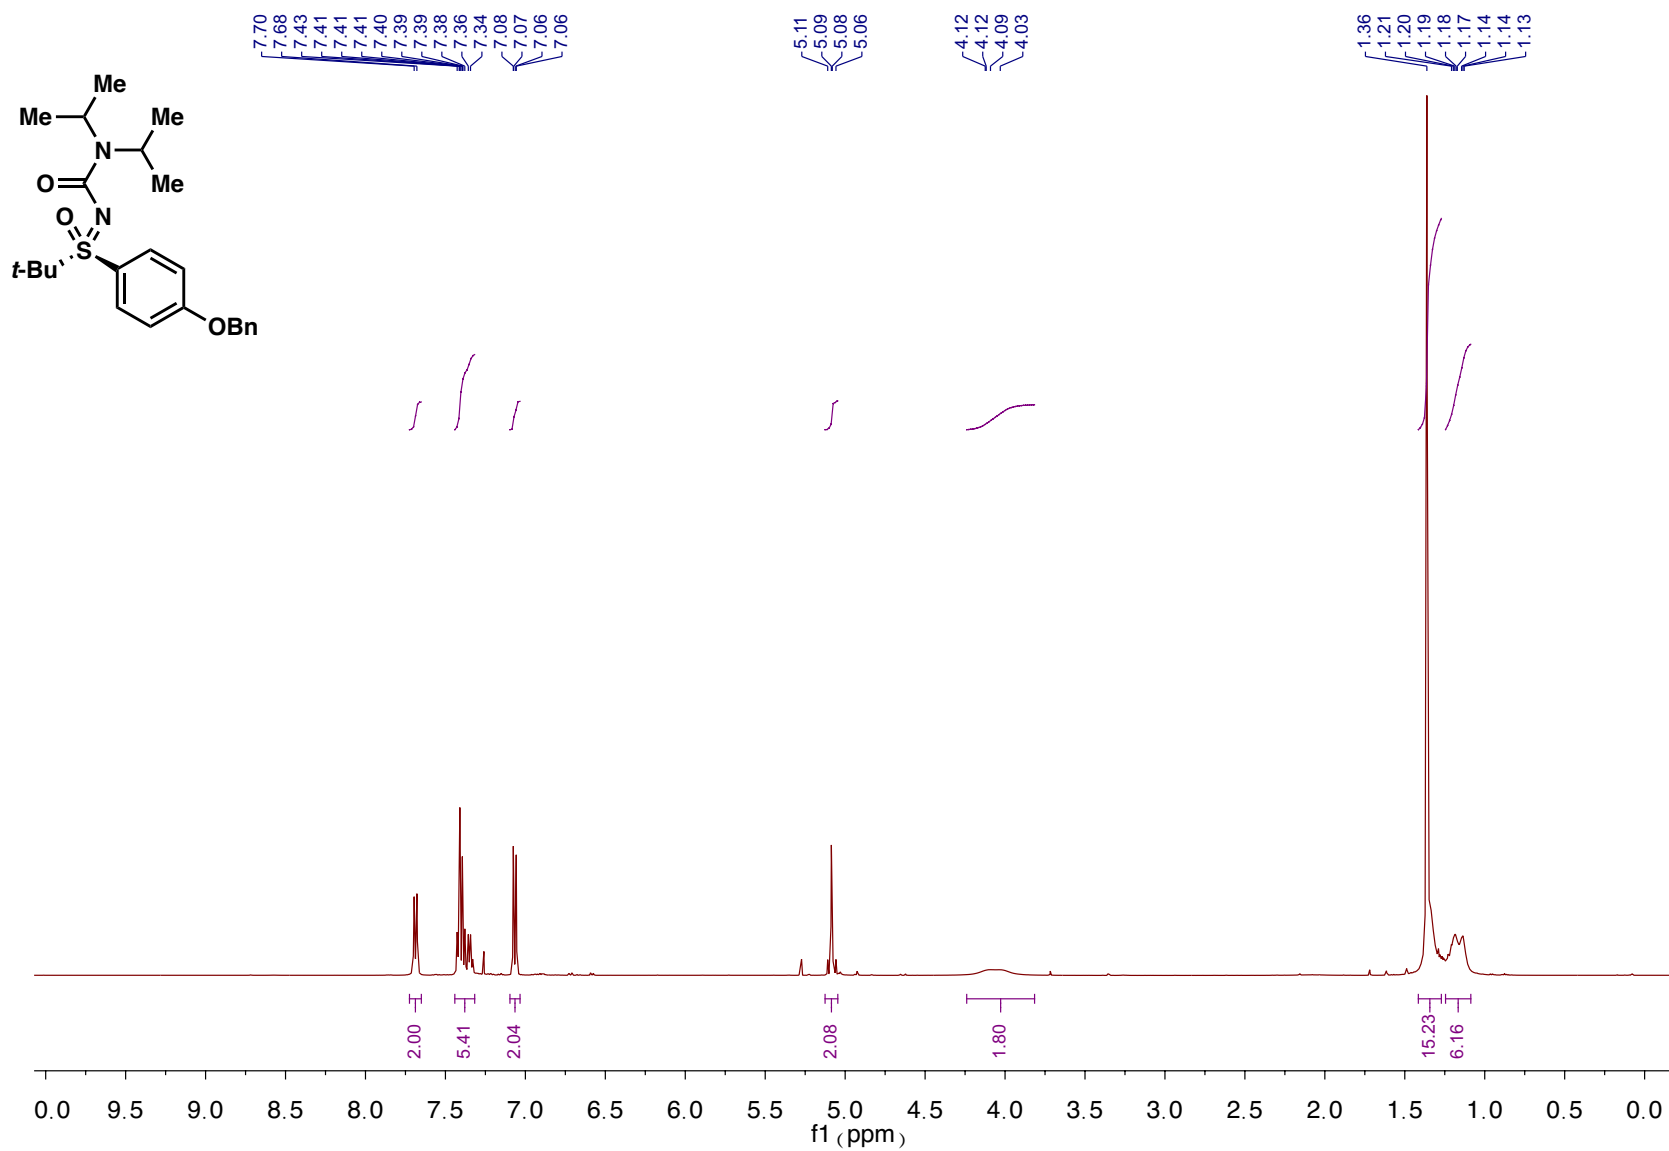

**$^{13}\text{C}$  NMR of compound 2h:**

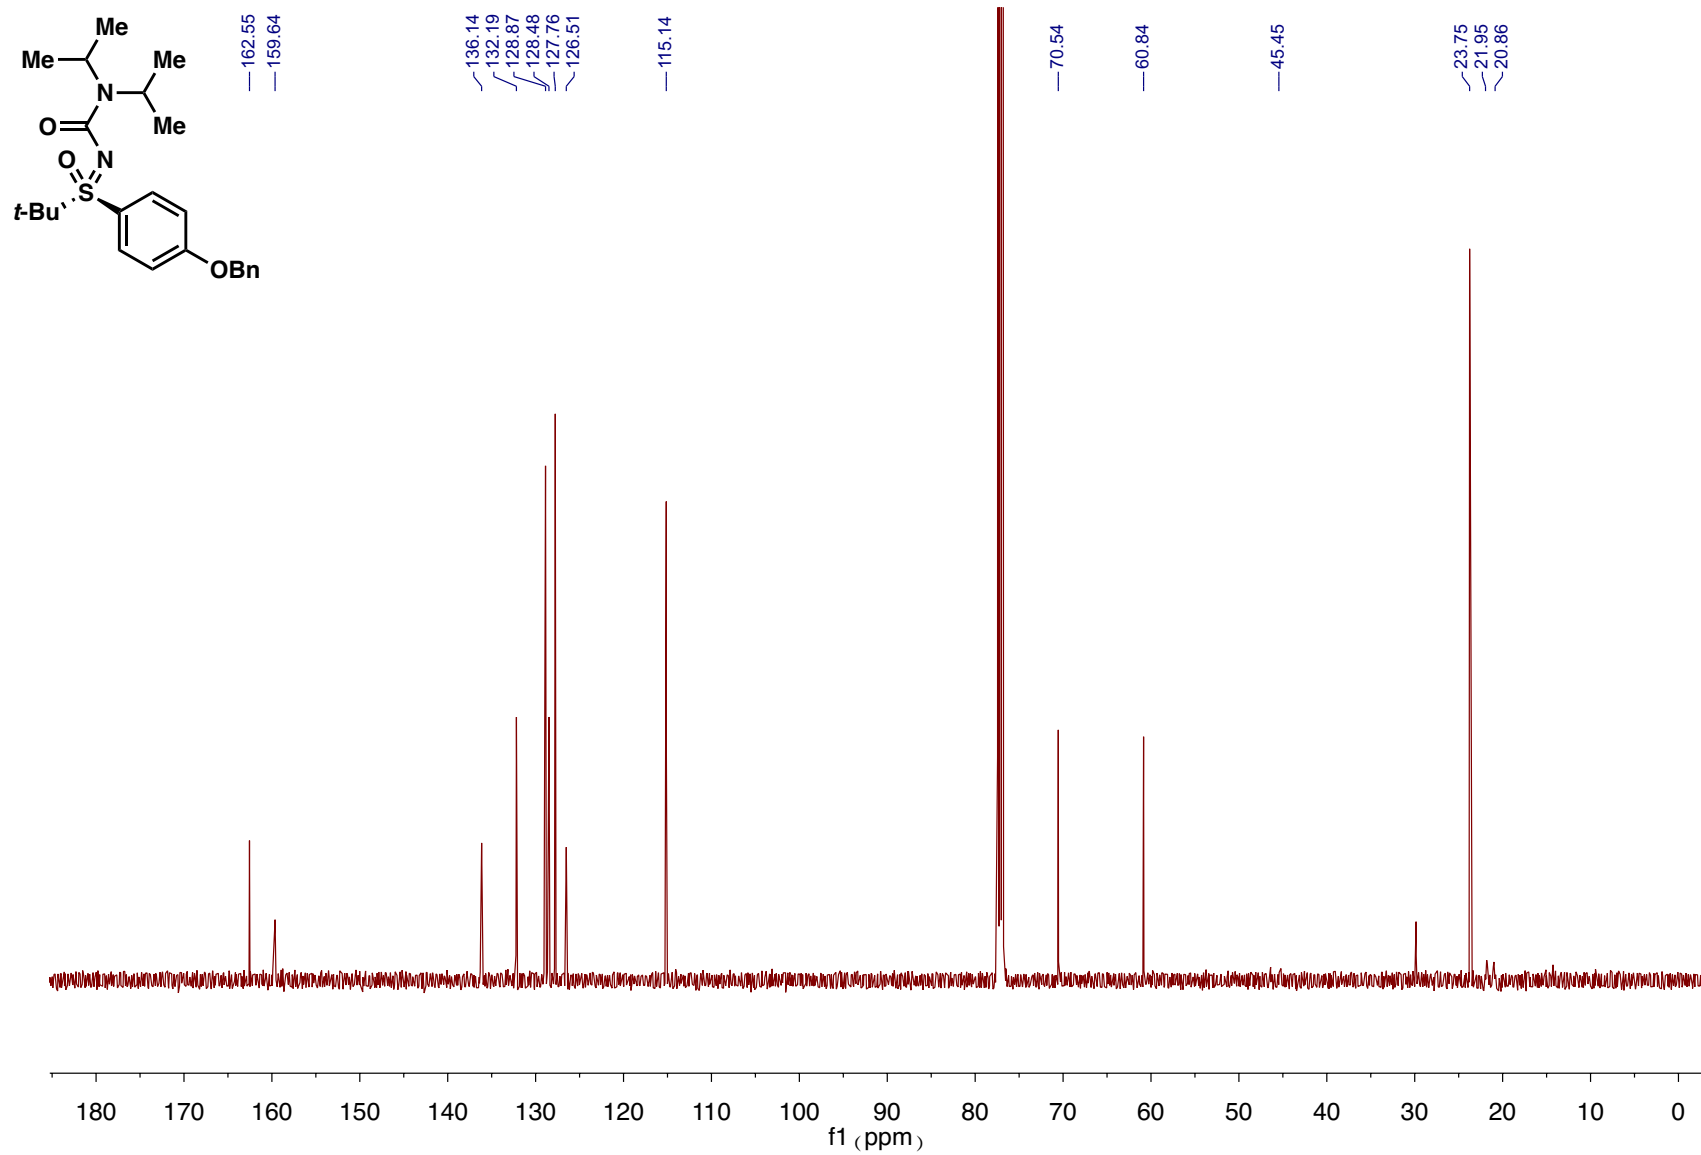

**<sup>1</sup>H NMR of compound 2i:**

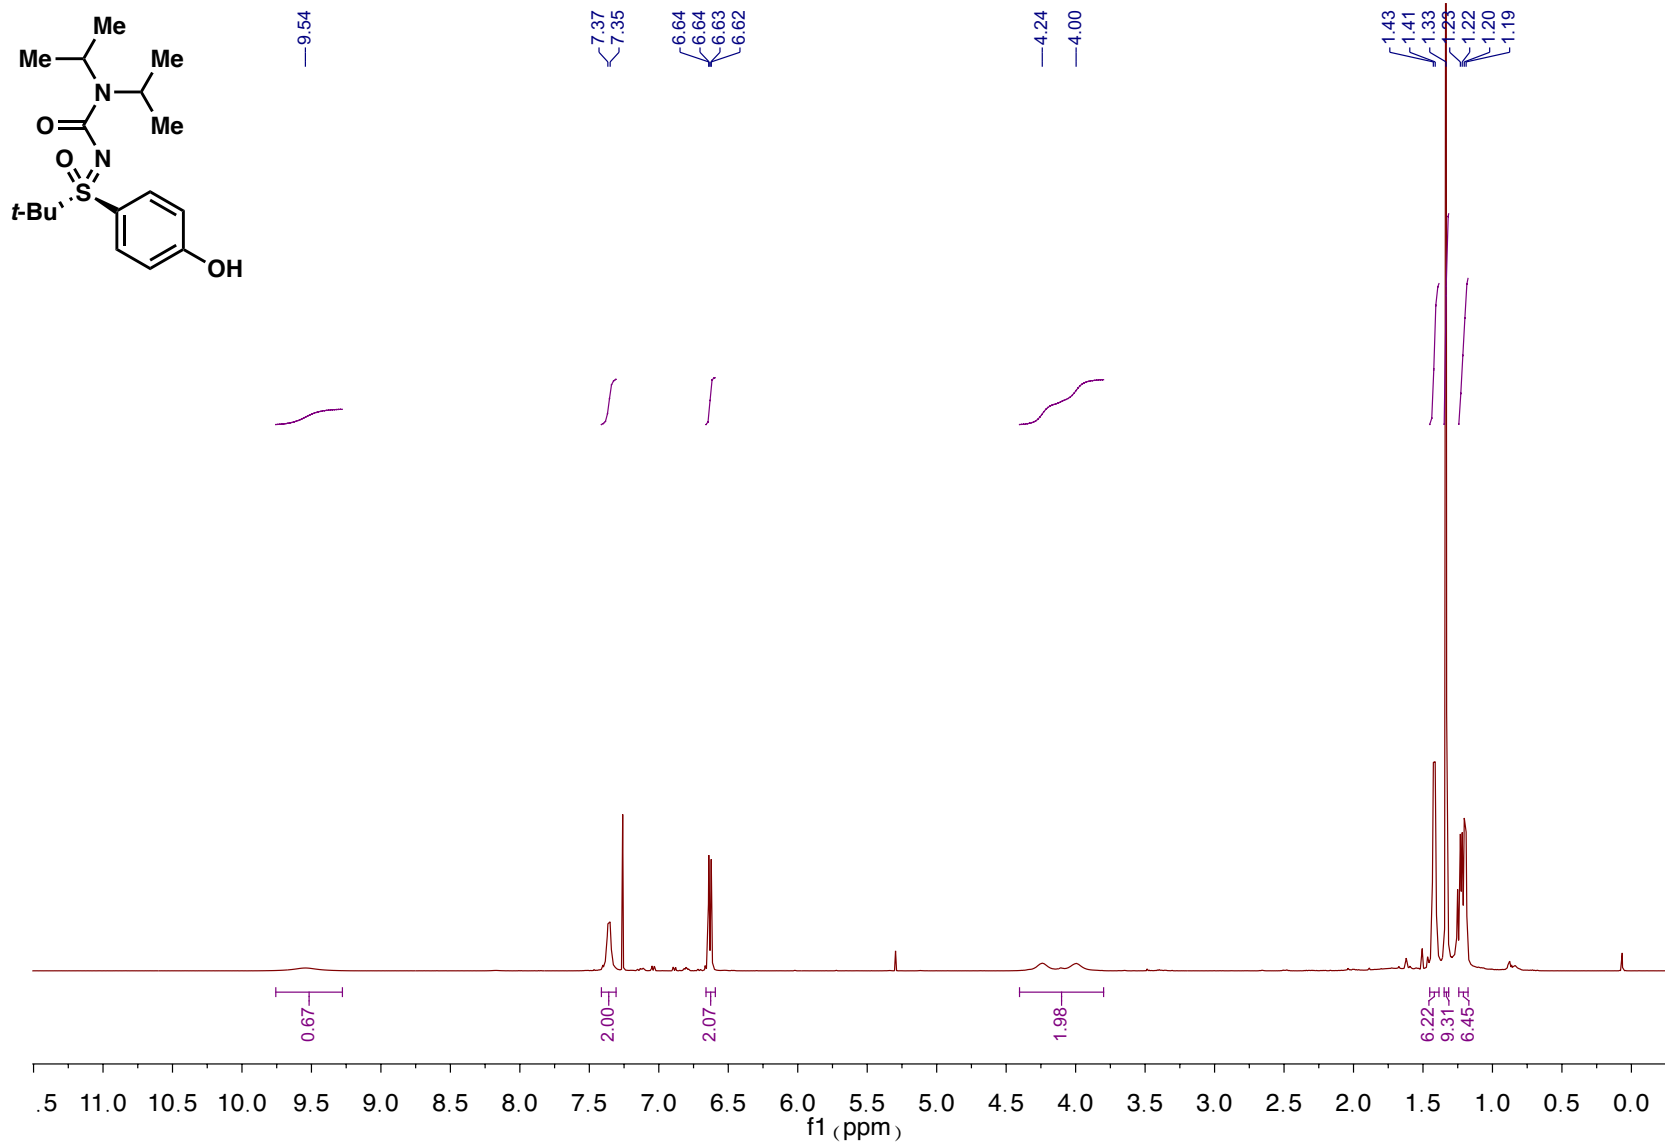

**<sup>13</sup>C NMR of compound 2i:**

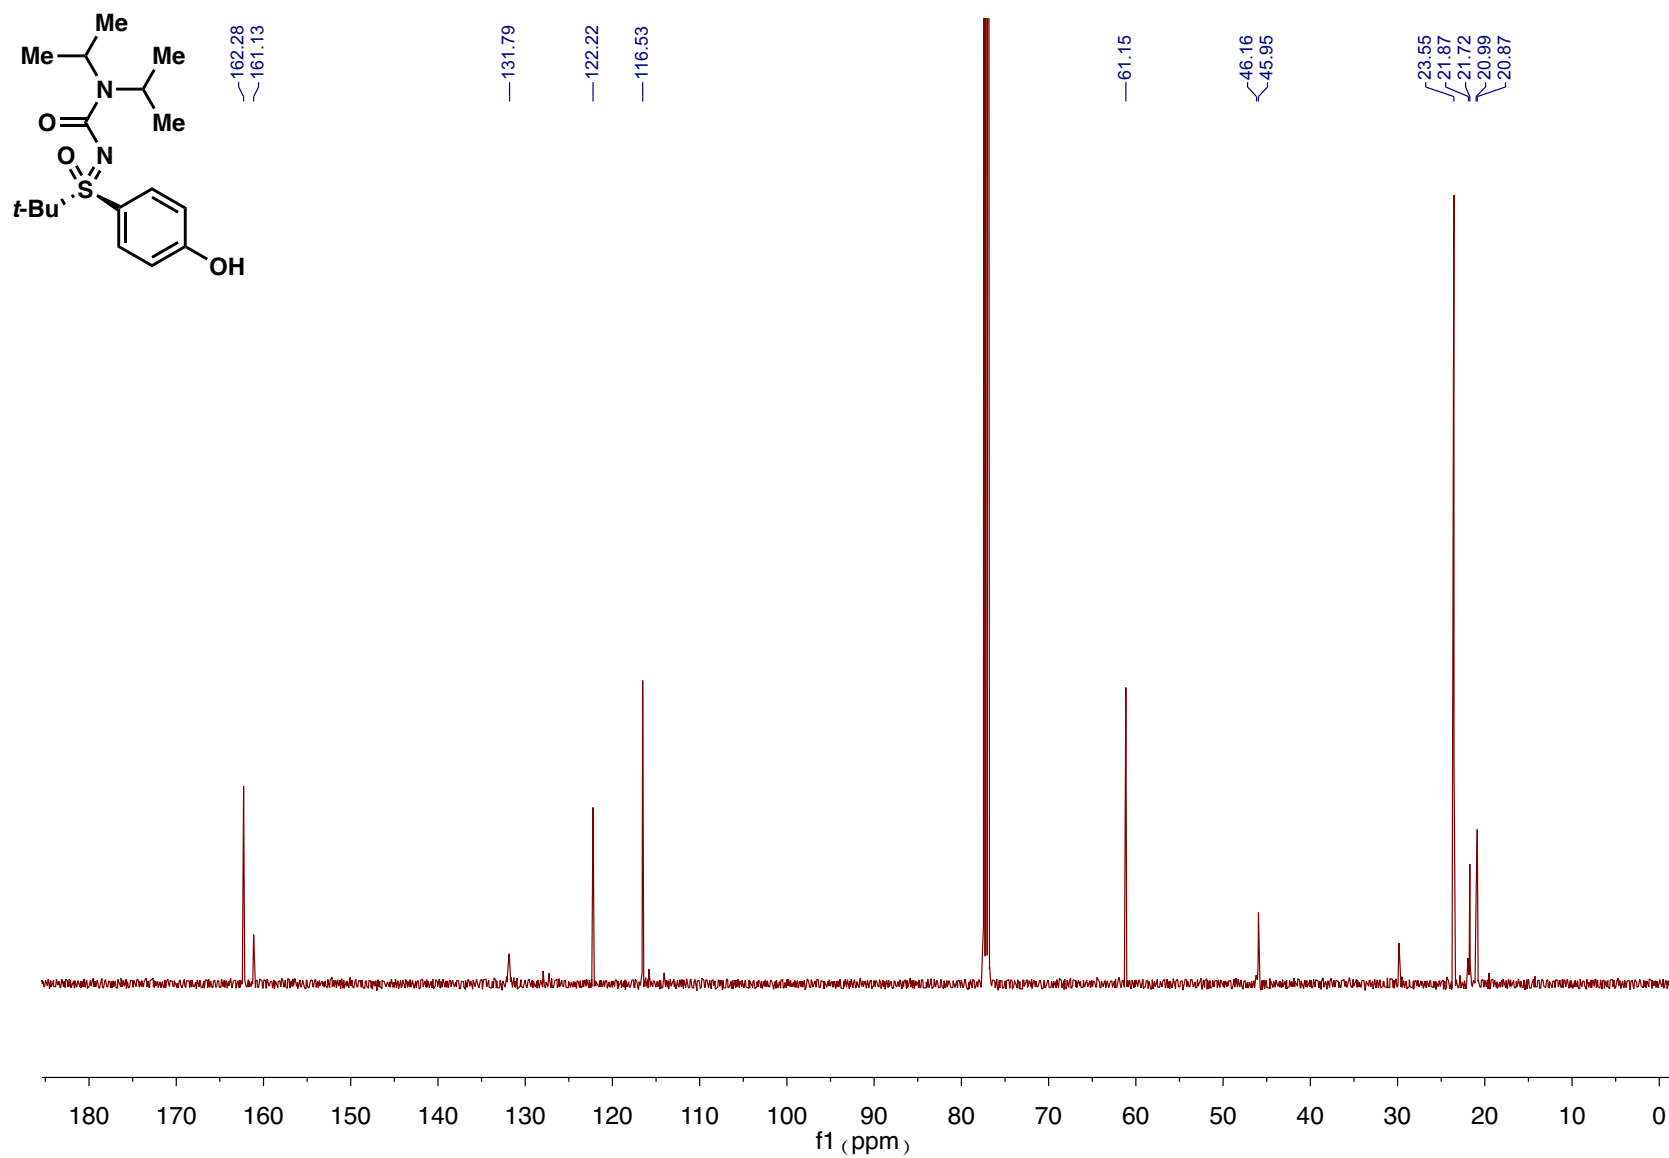

**<sup>1</sup>H NMR of compound 2j:**

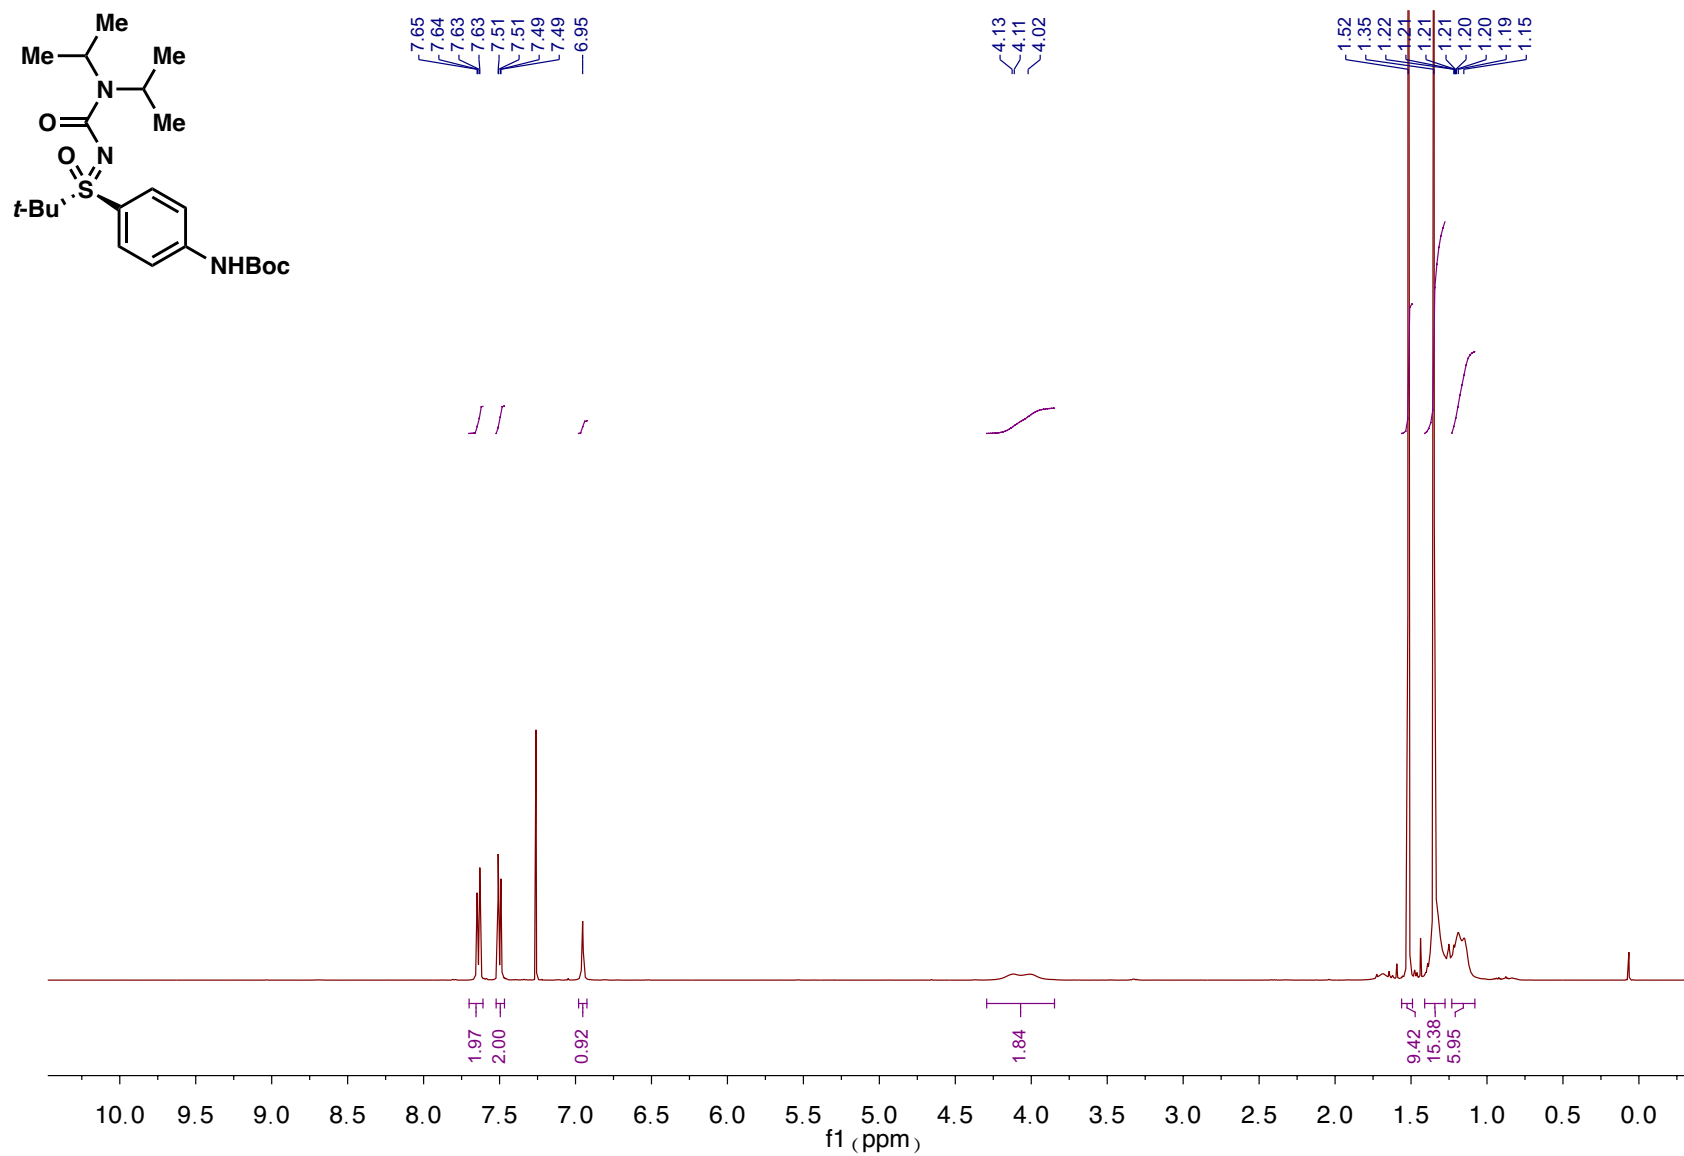

**$^{13}\text{C}$  NMR of compound 2j:**

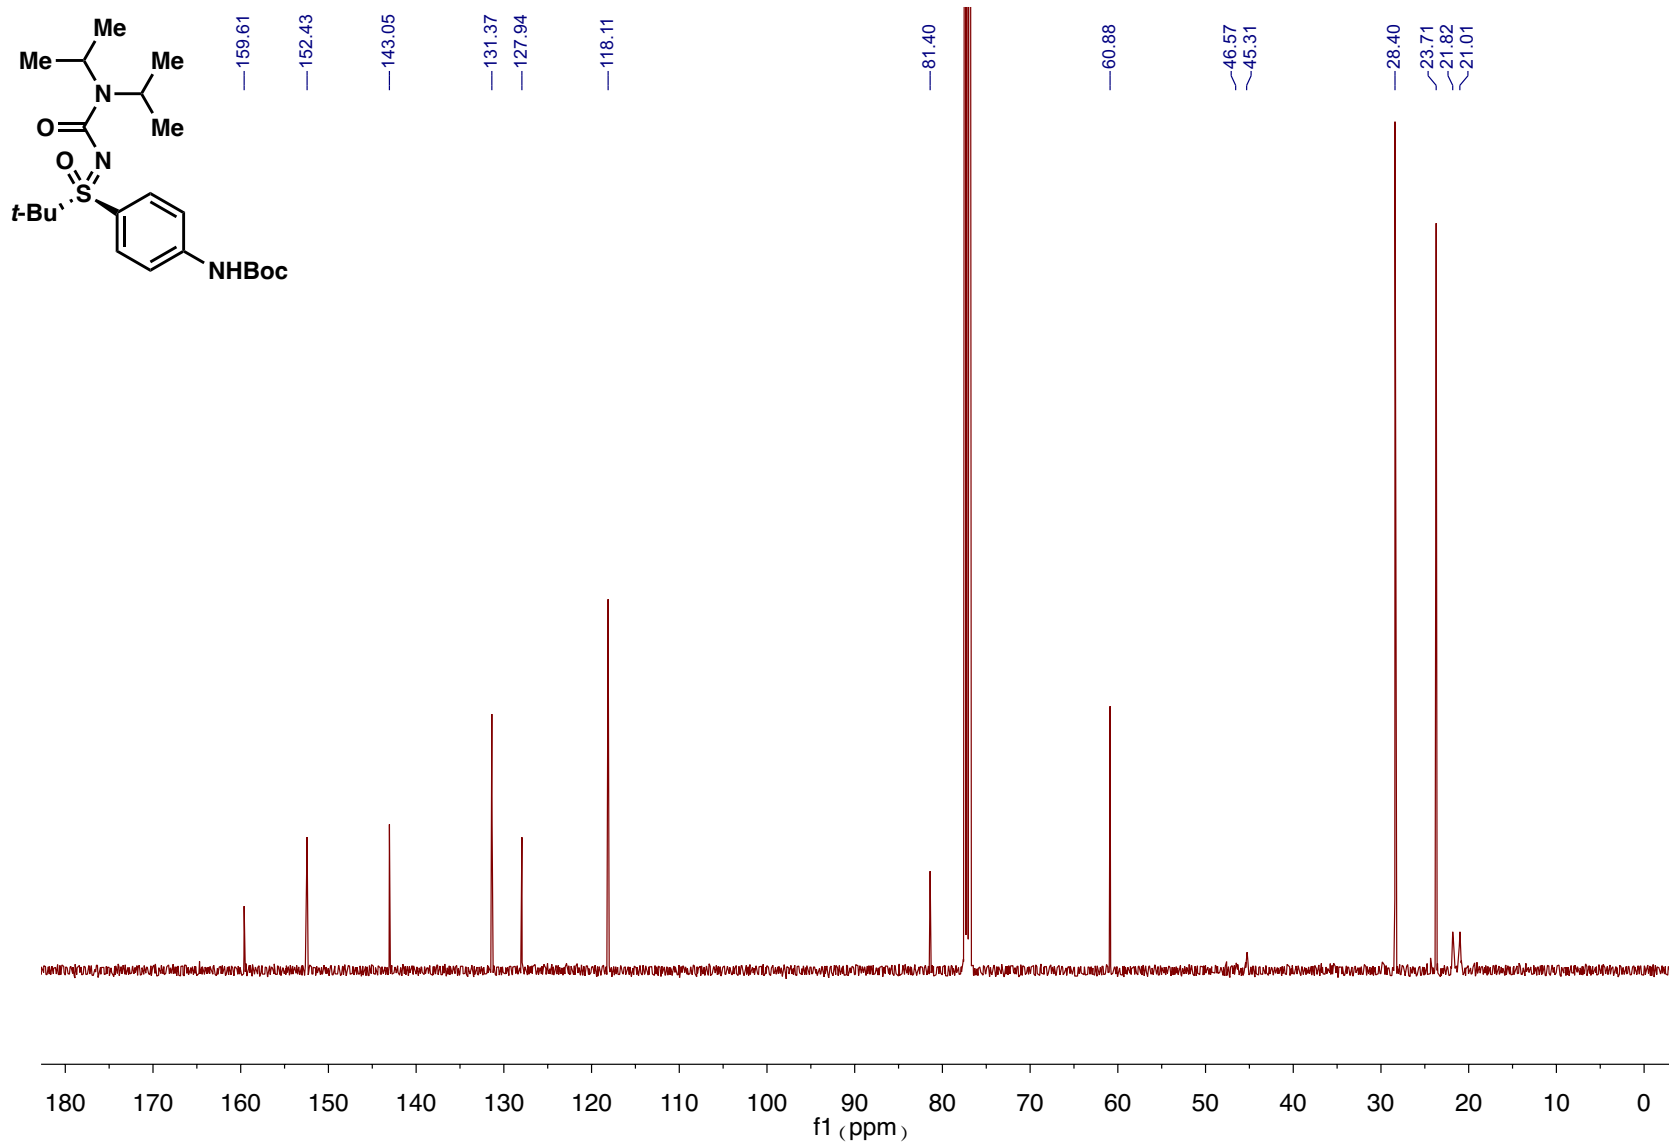

**<sup>1</sup>H NMR of compound 2k:**

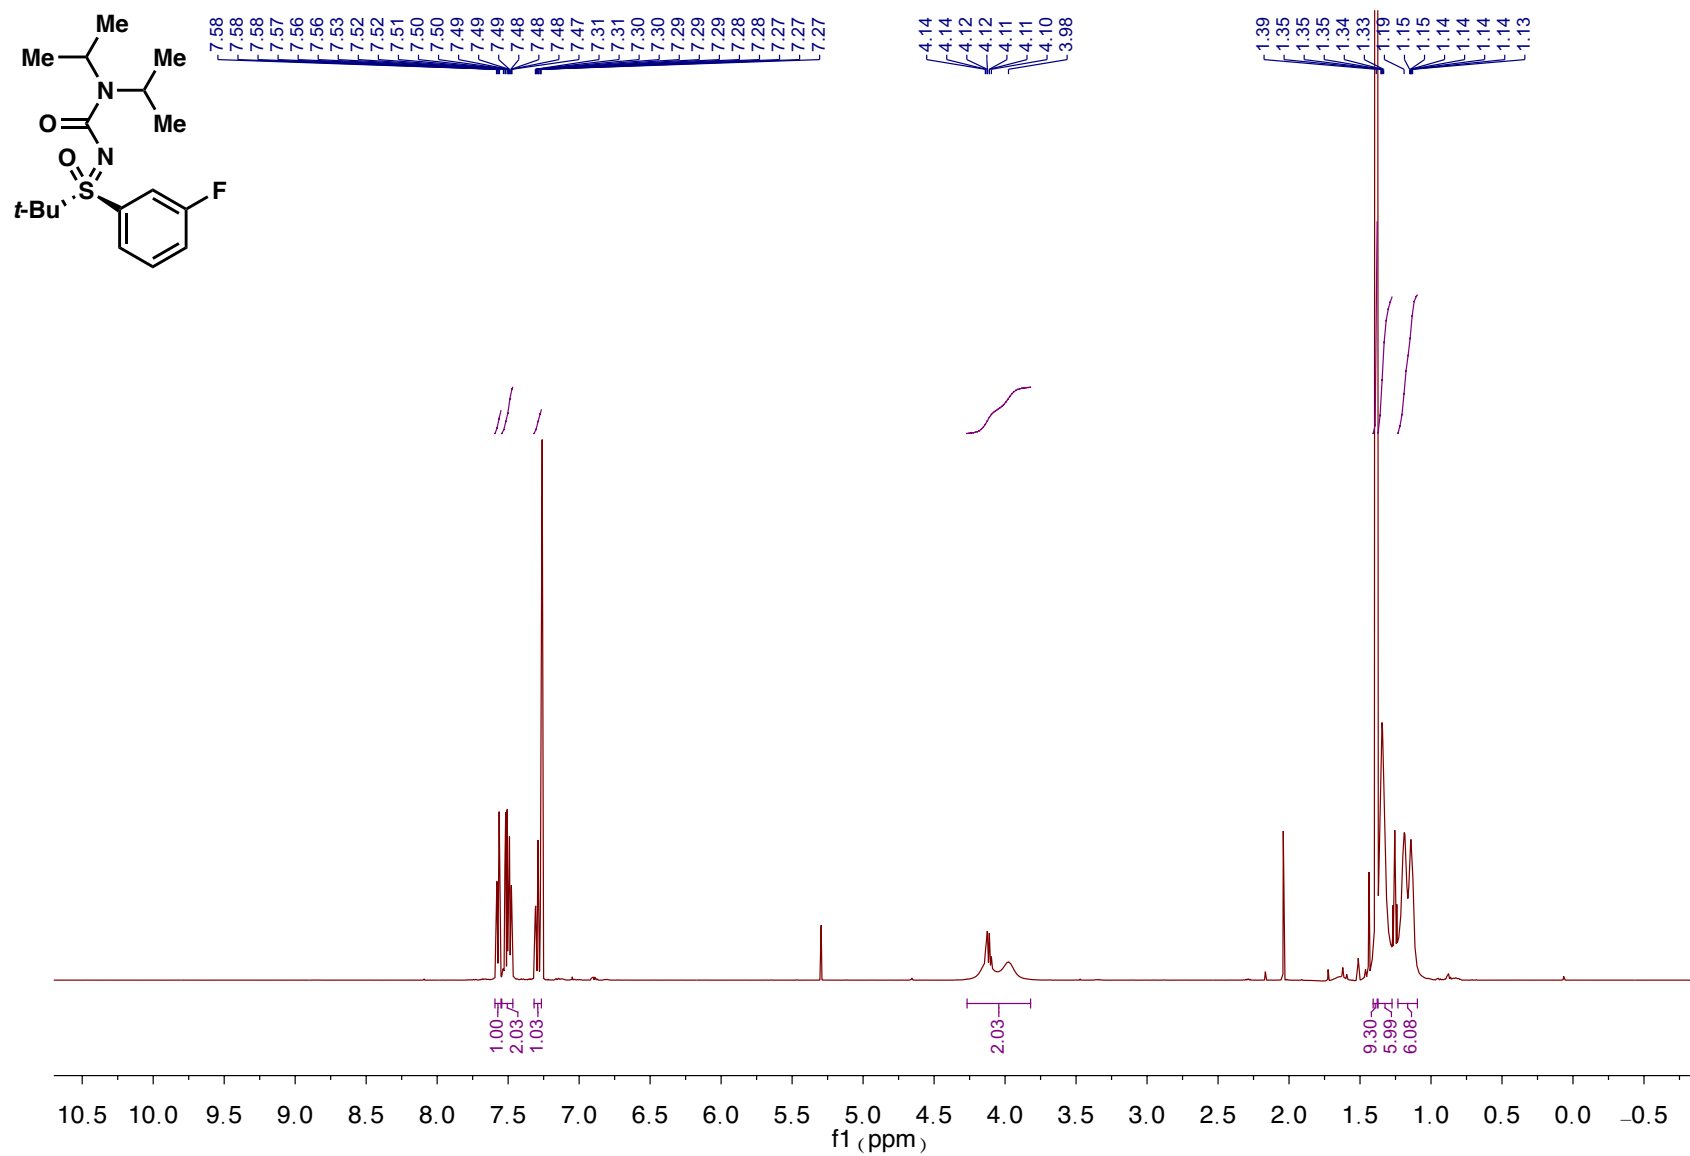

**<sup>13</sup>C NMR of compound 2k:**

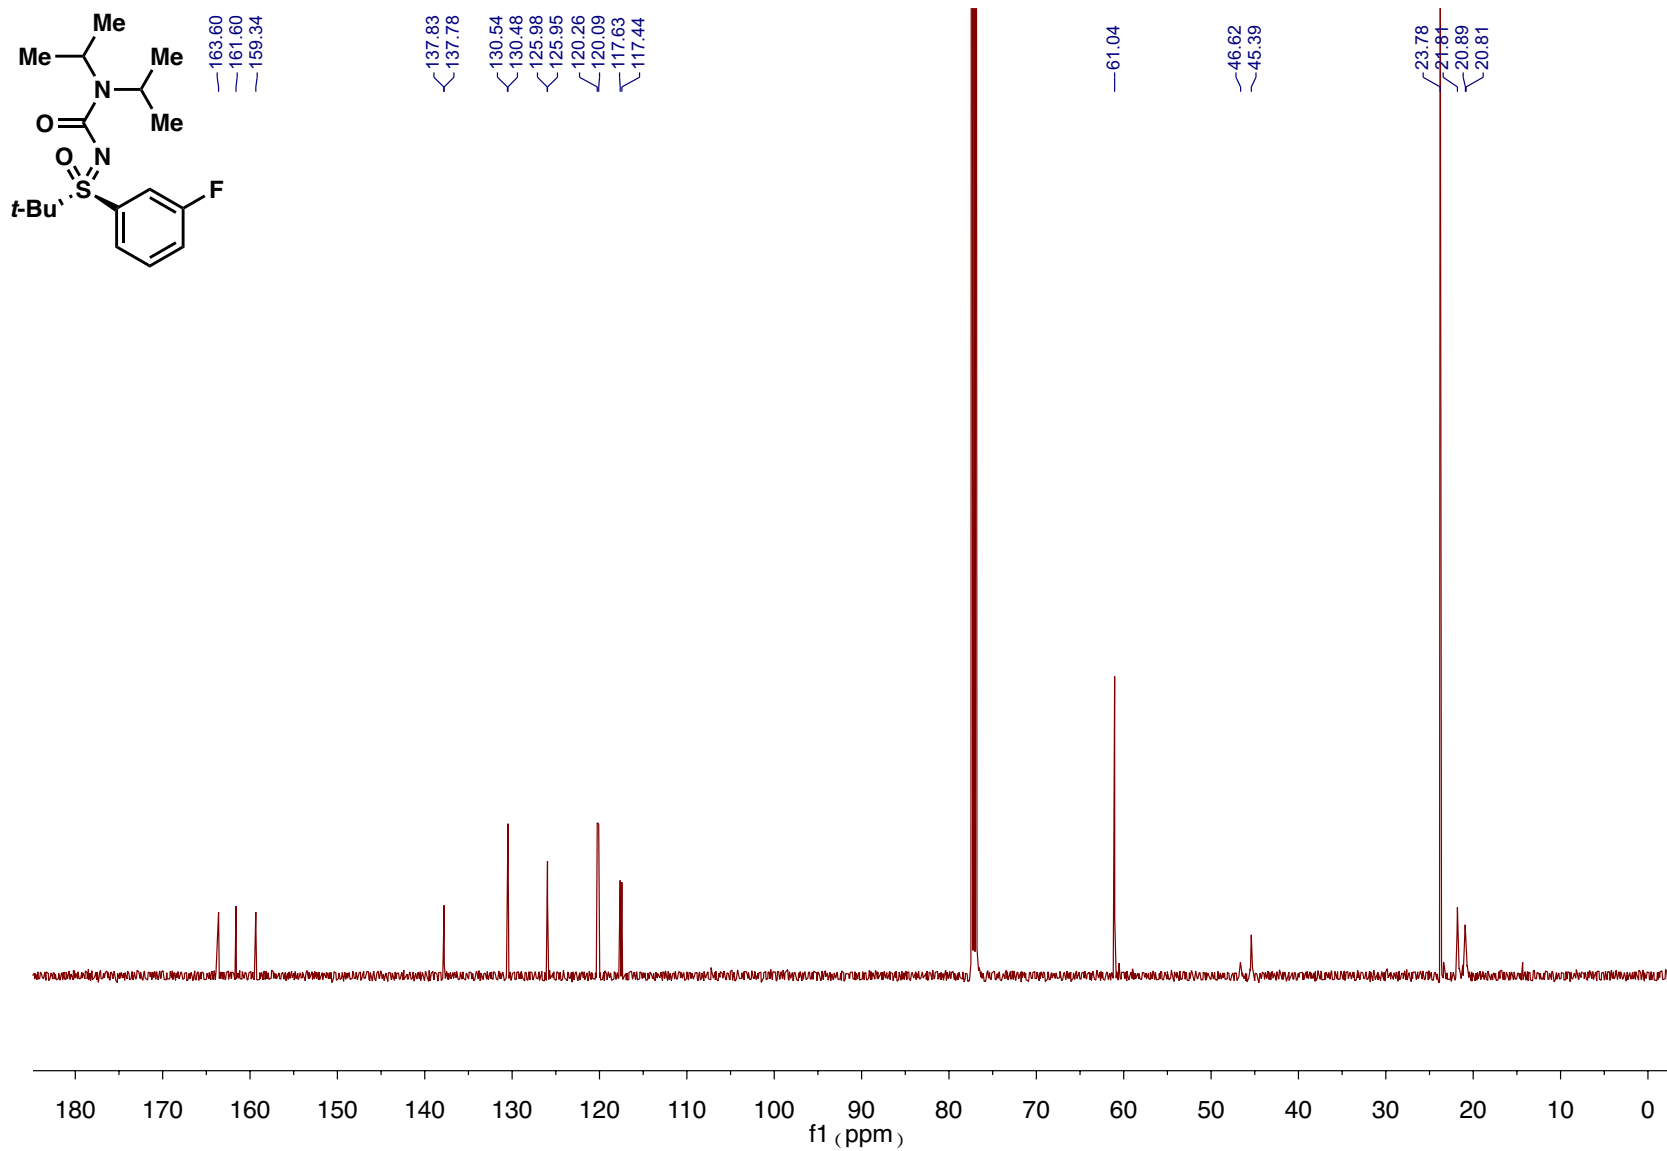

**$^{19}\text{F}$  NMR of compound 2k:**

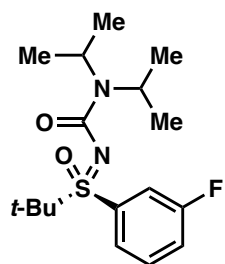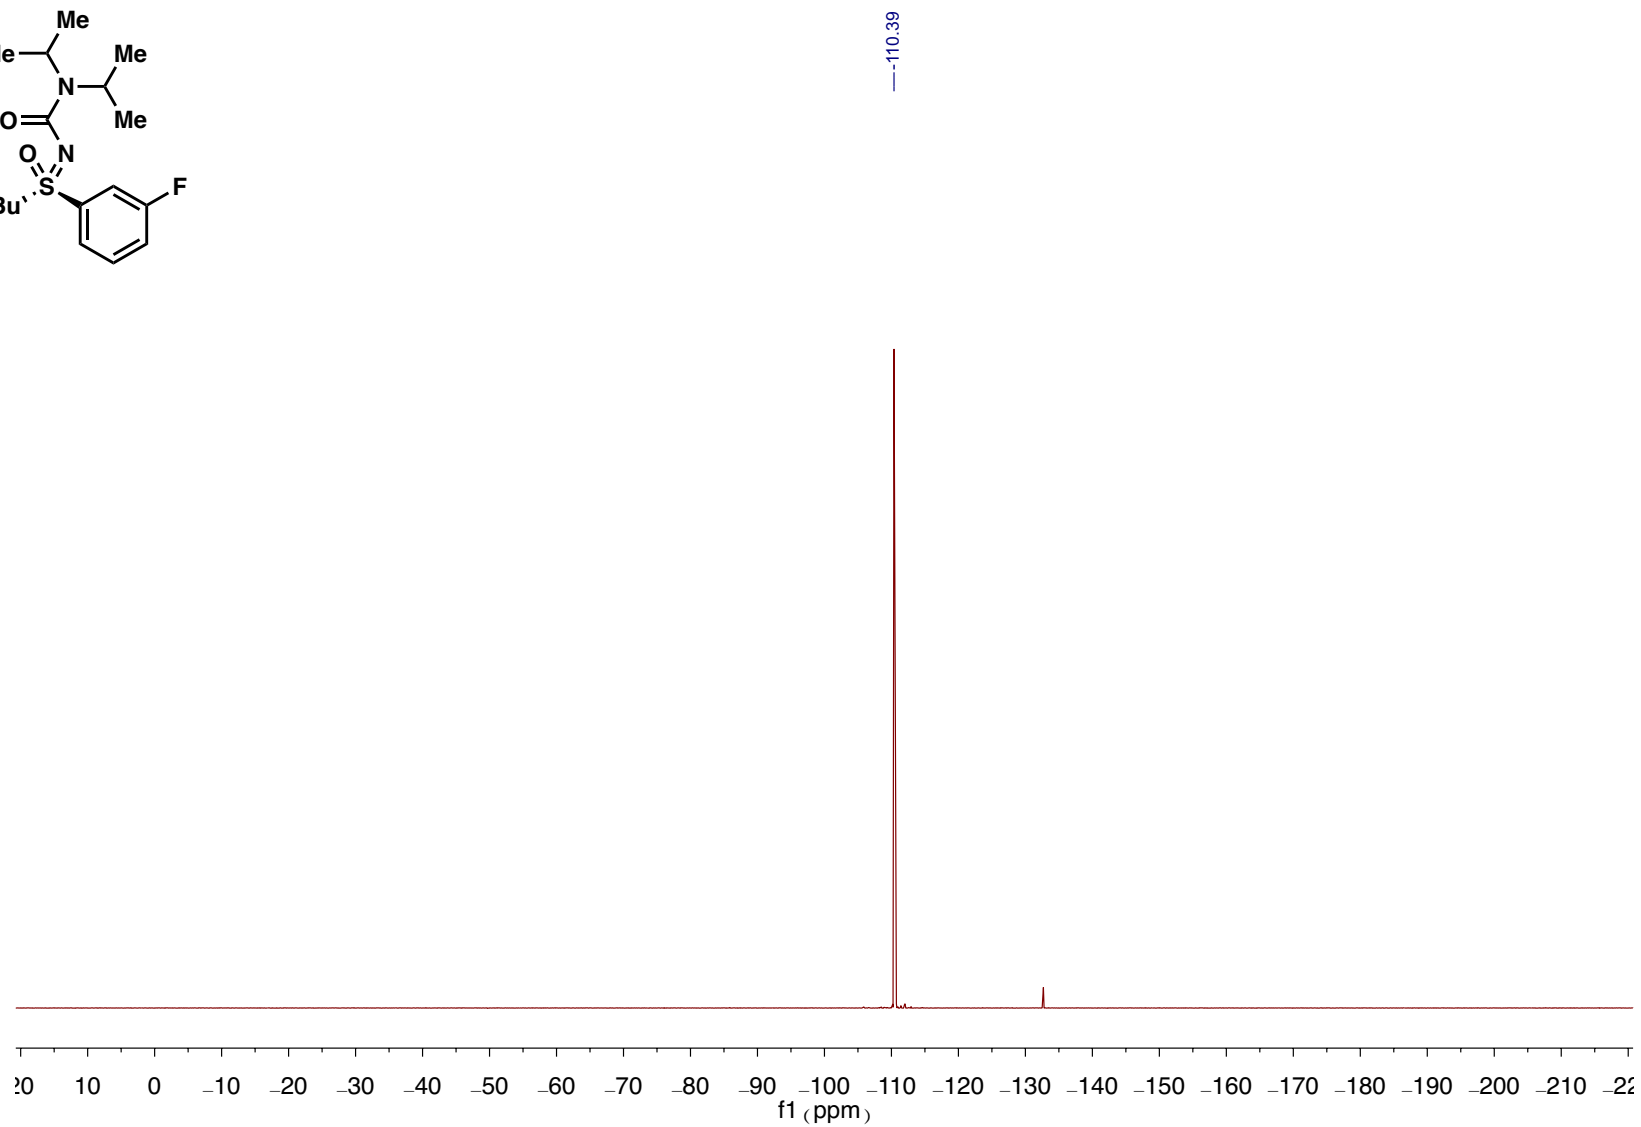

**<sup>1</sup>H NMR of compound 2I:**

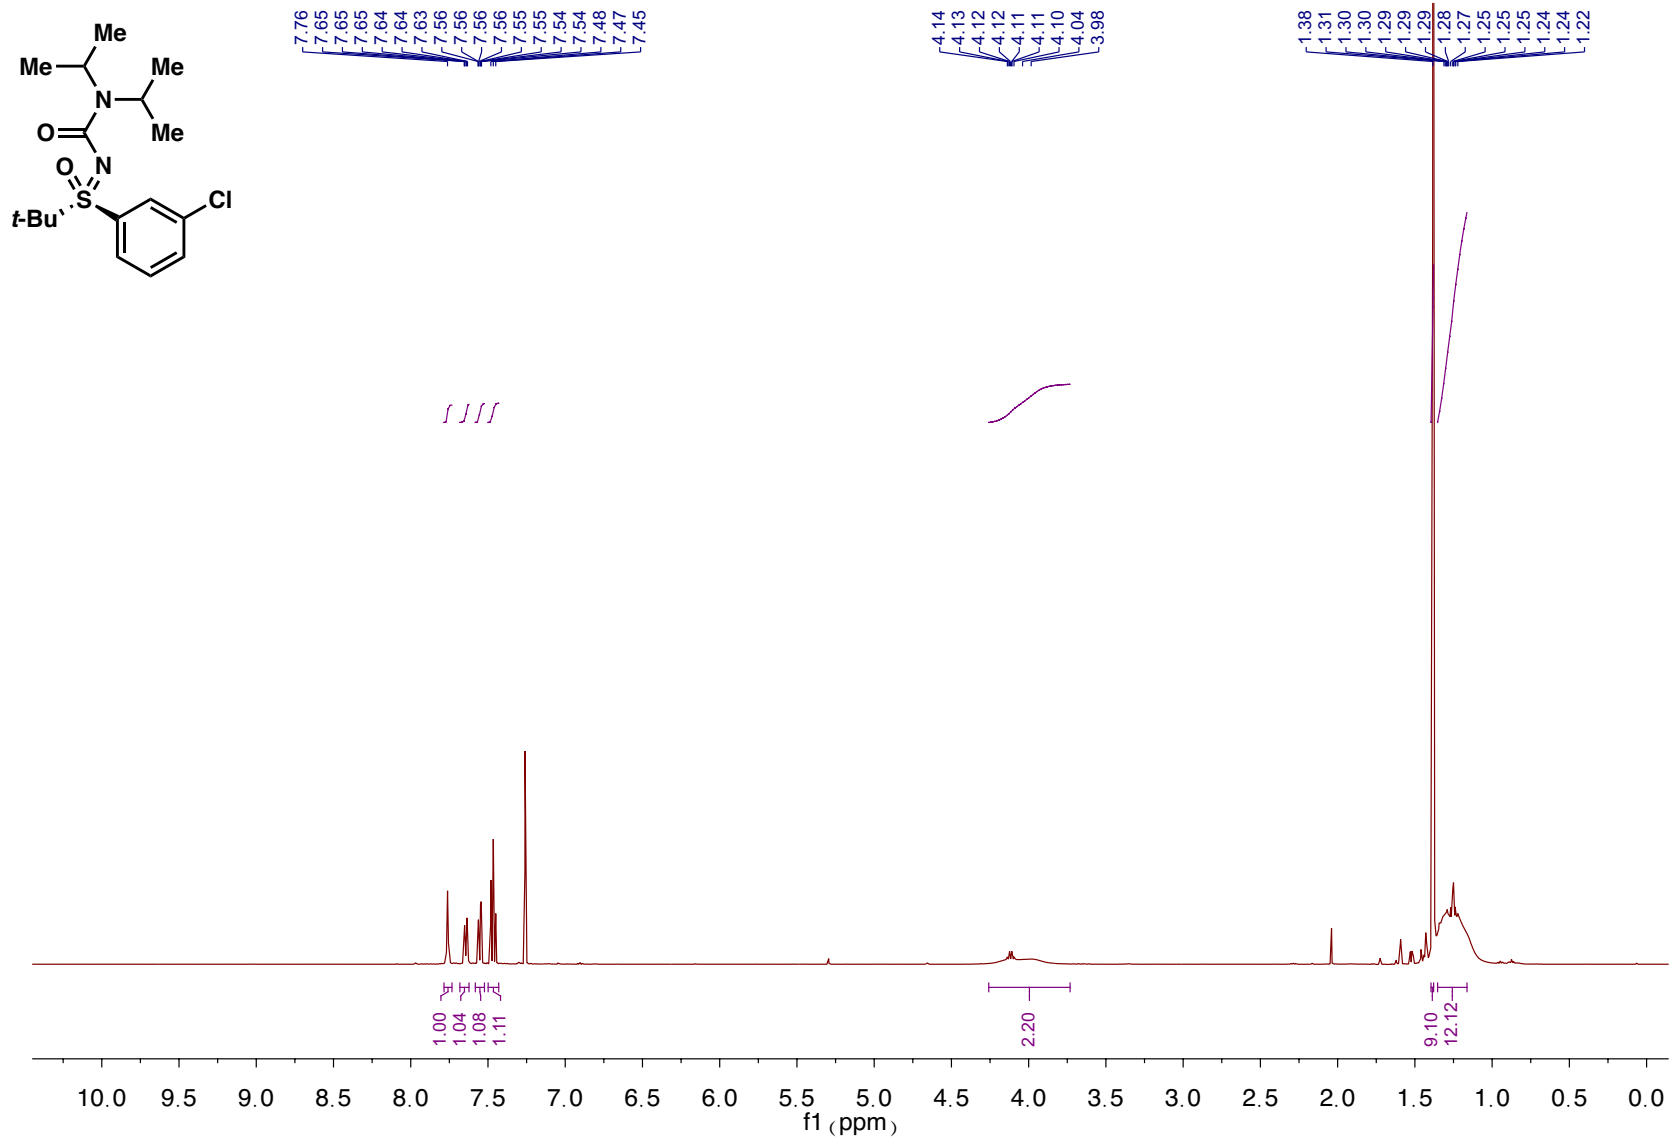

**$^{13}\text{C}$  NMR of compound 2I:**

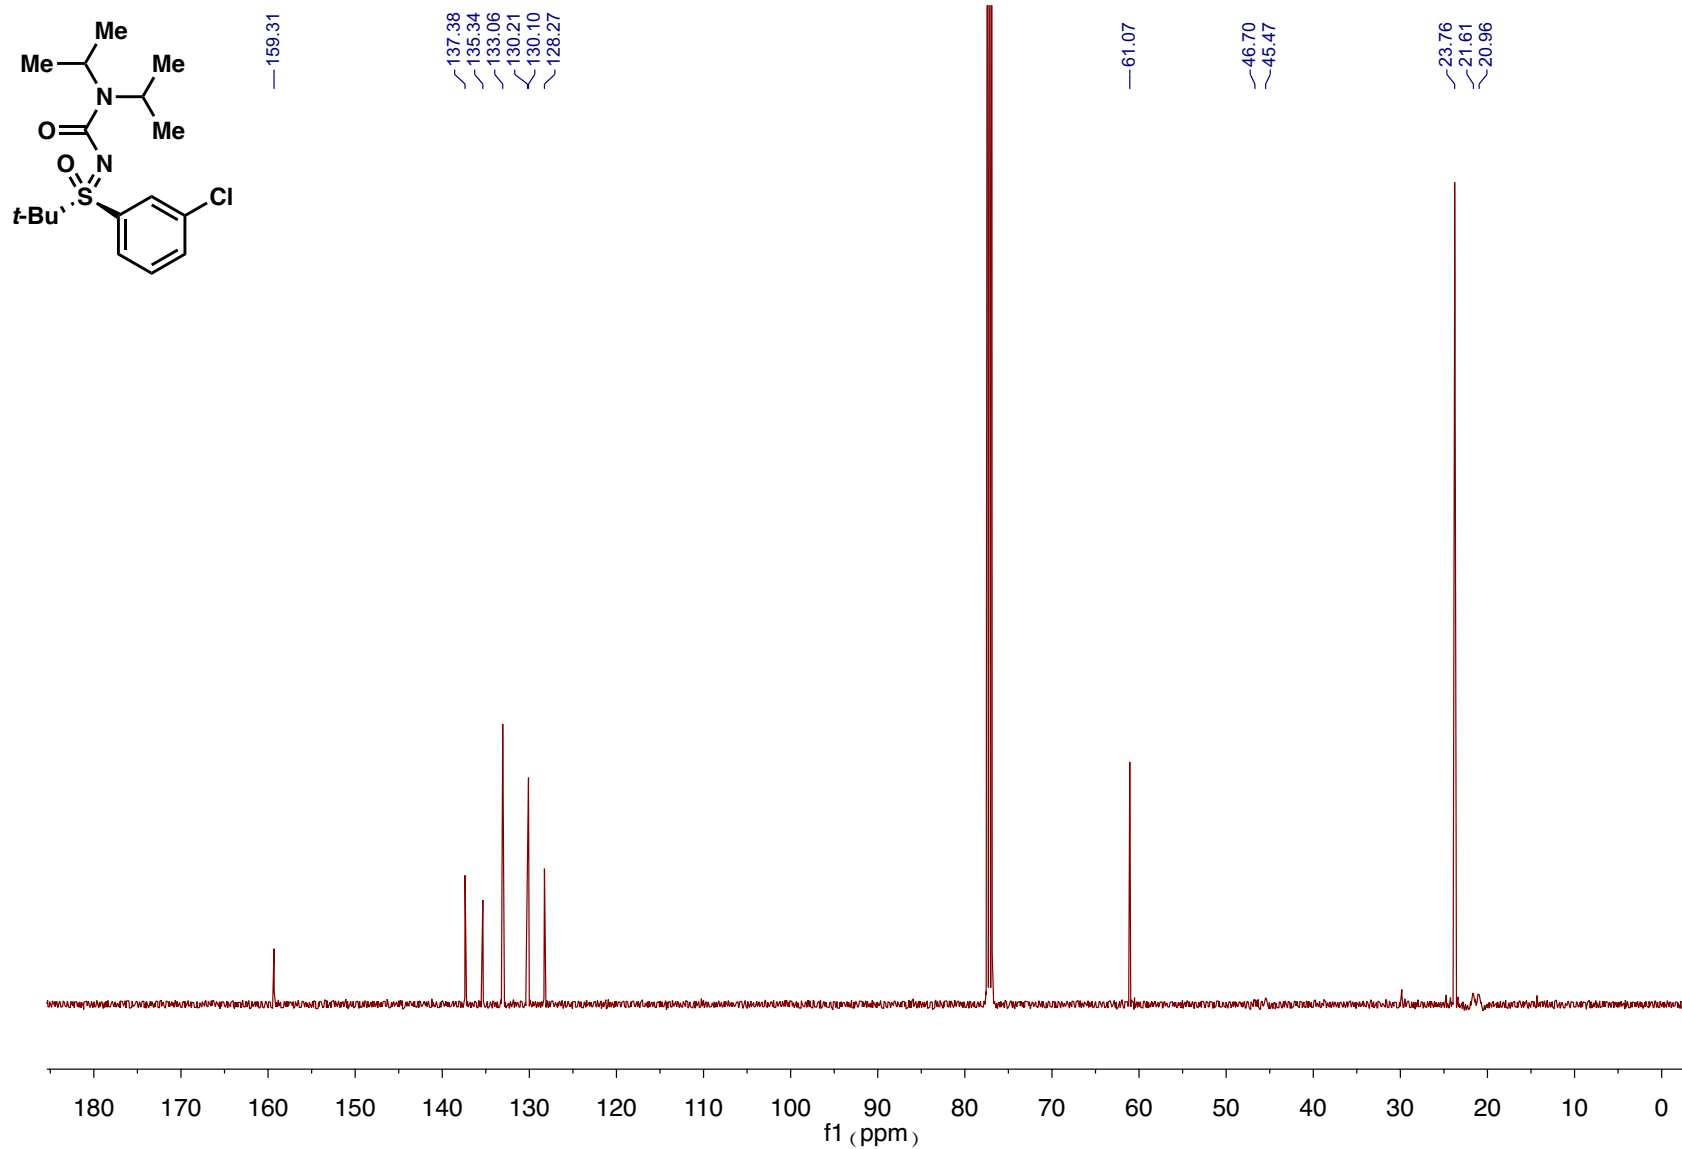

**<sup>1</sup>H NMR of compound 2m:**

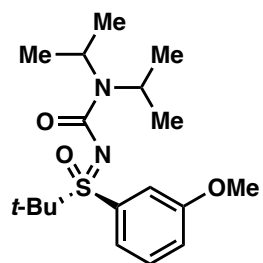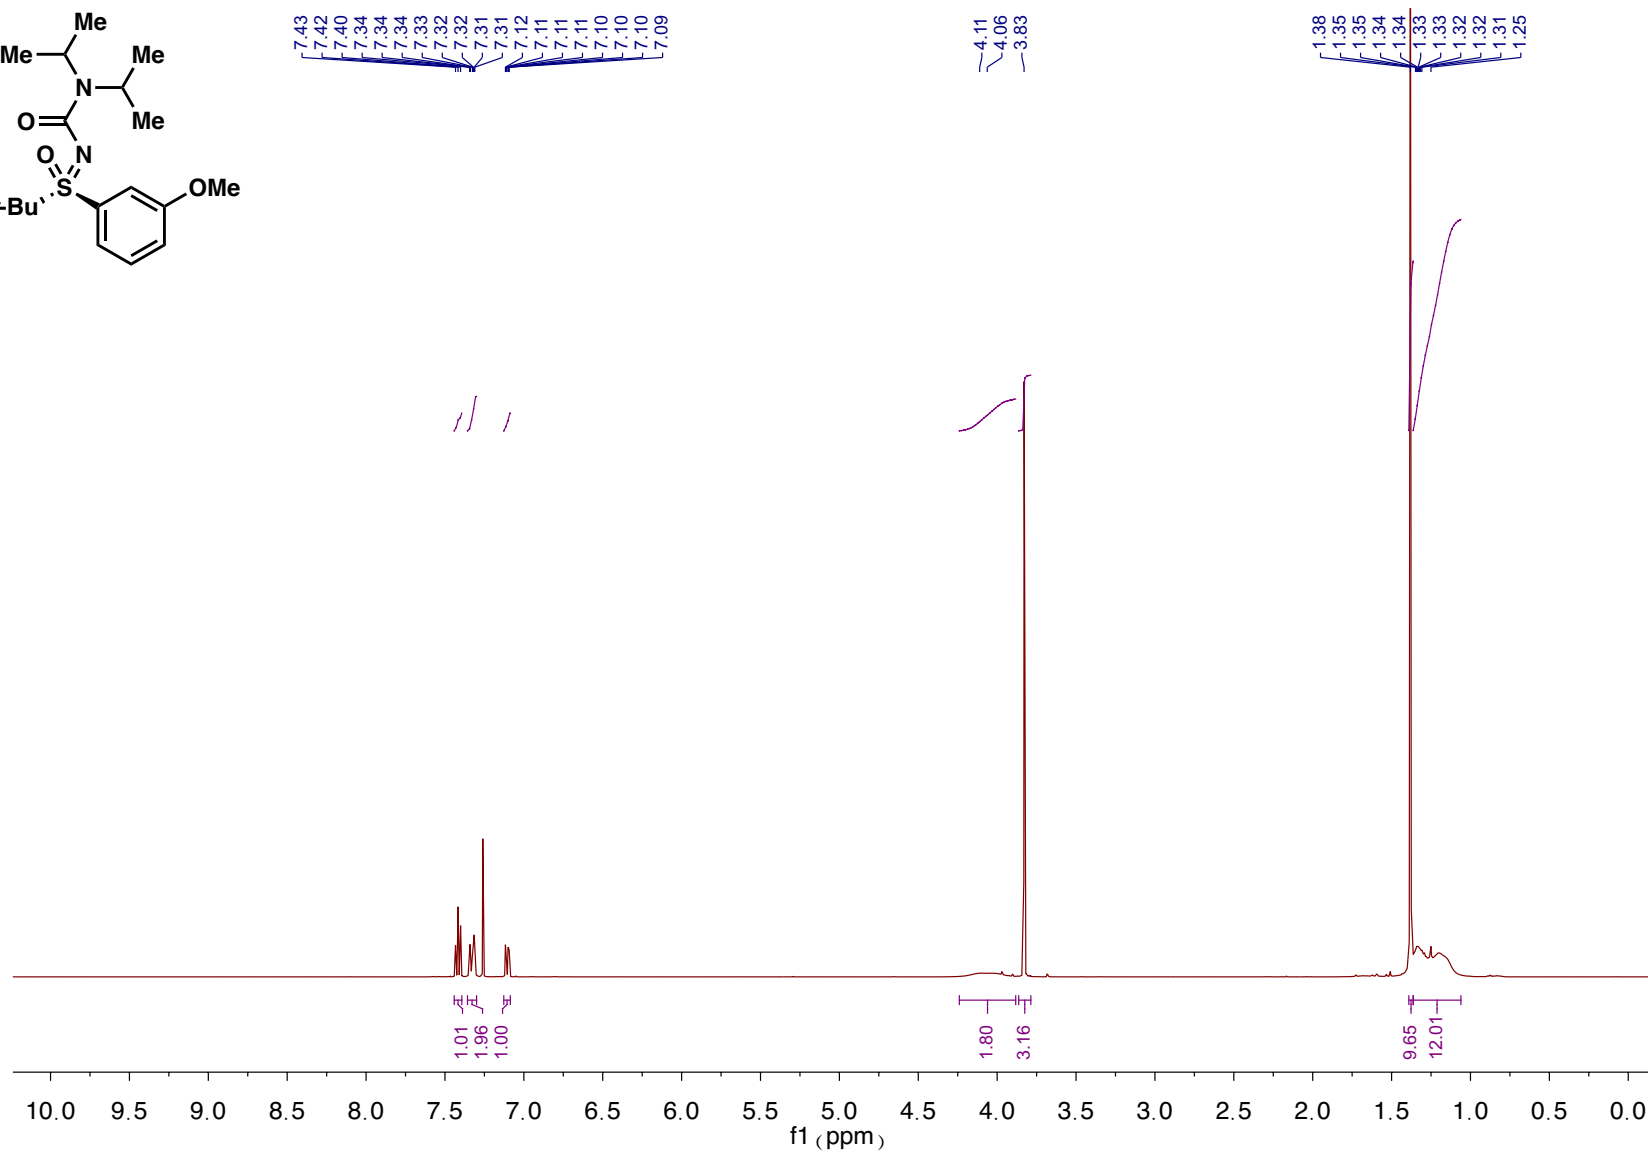

**<sup>13</sup>C NMR of compound 2m:**

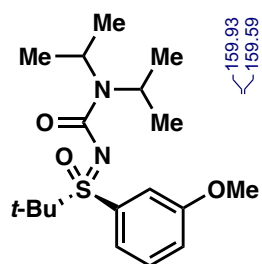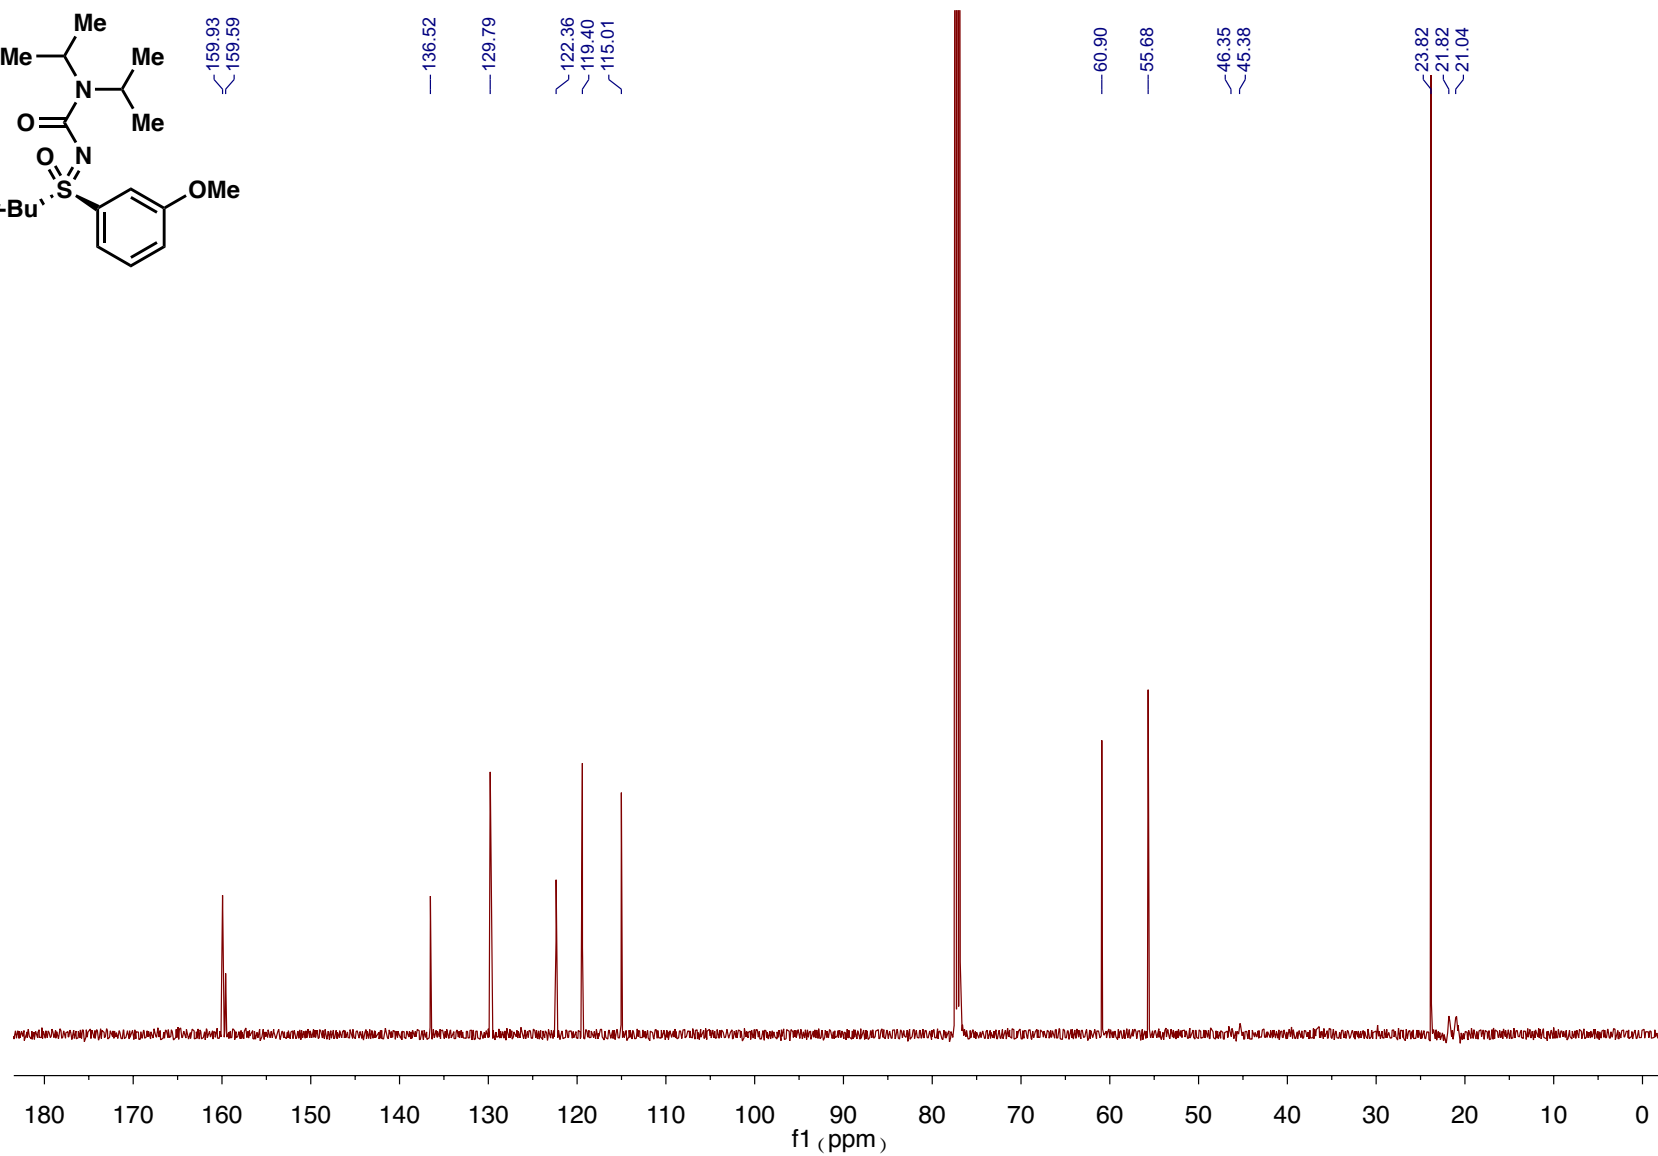

**<sup>1</sup>H NMR of compound 2n:**

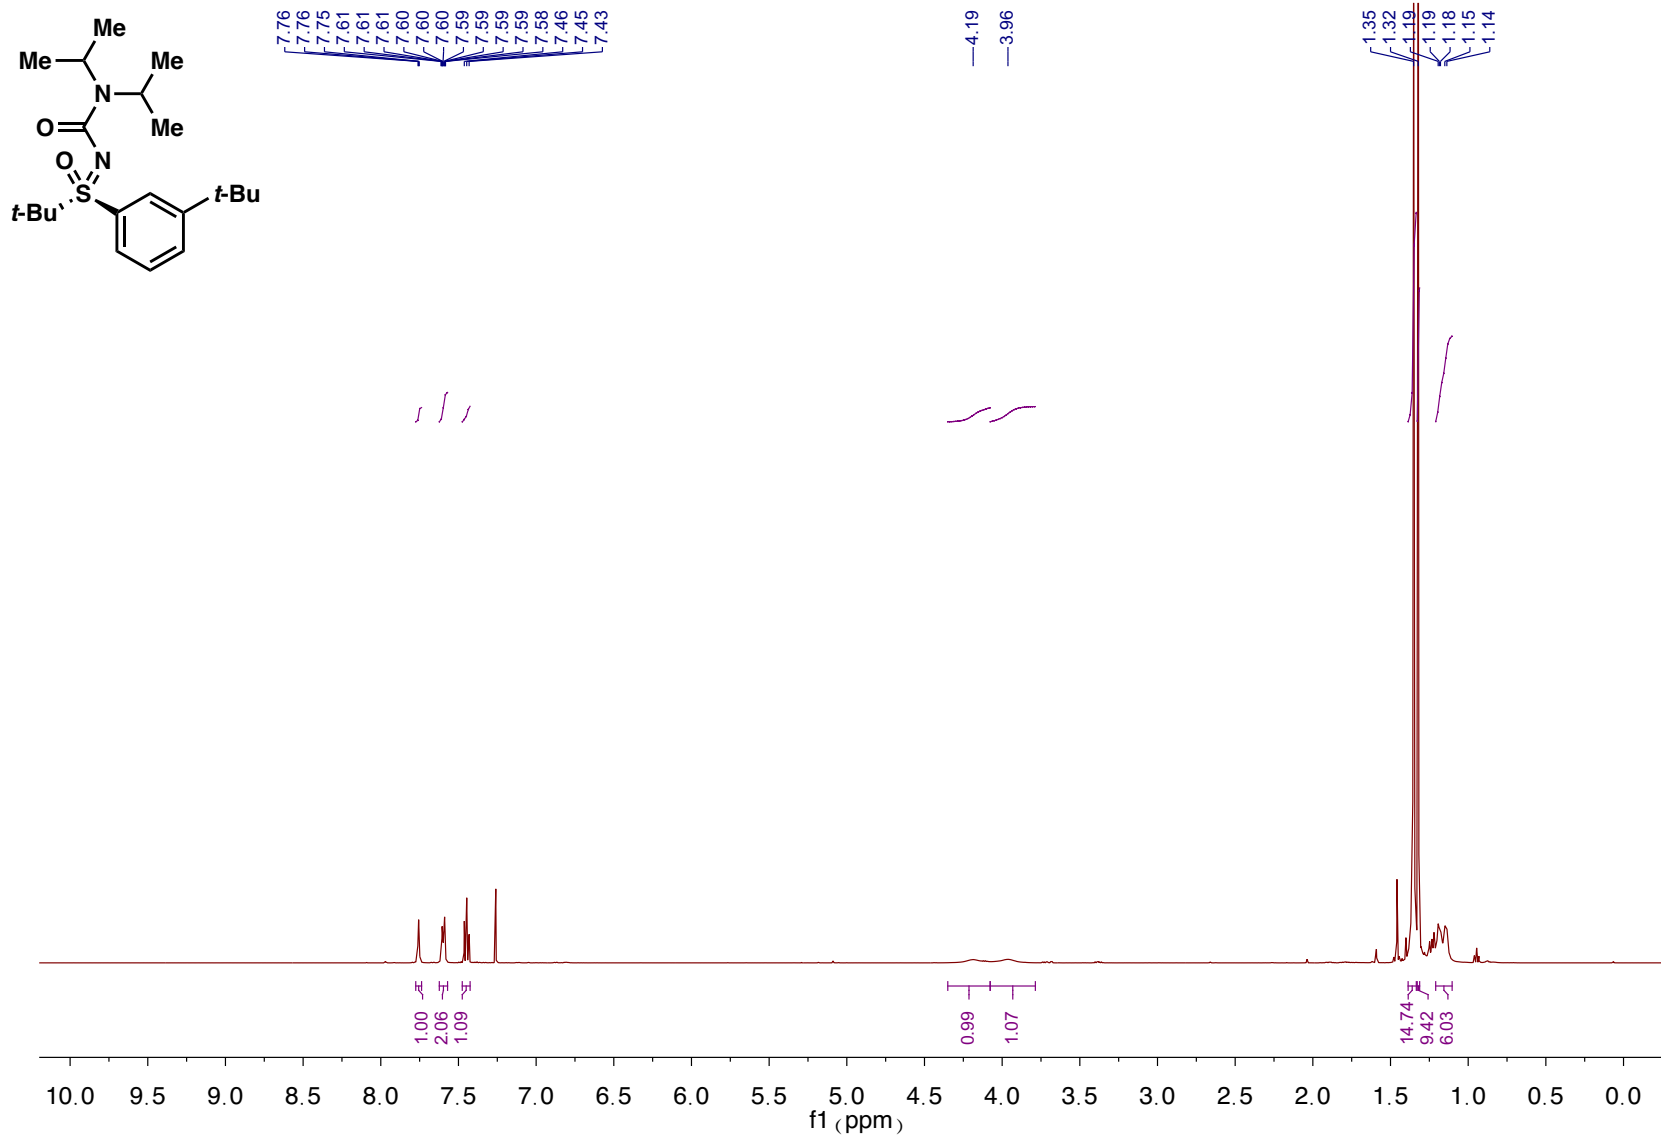

**$^{13}\text{C}$  NMR of compound 2n:**

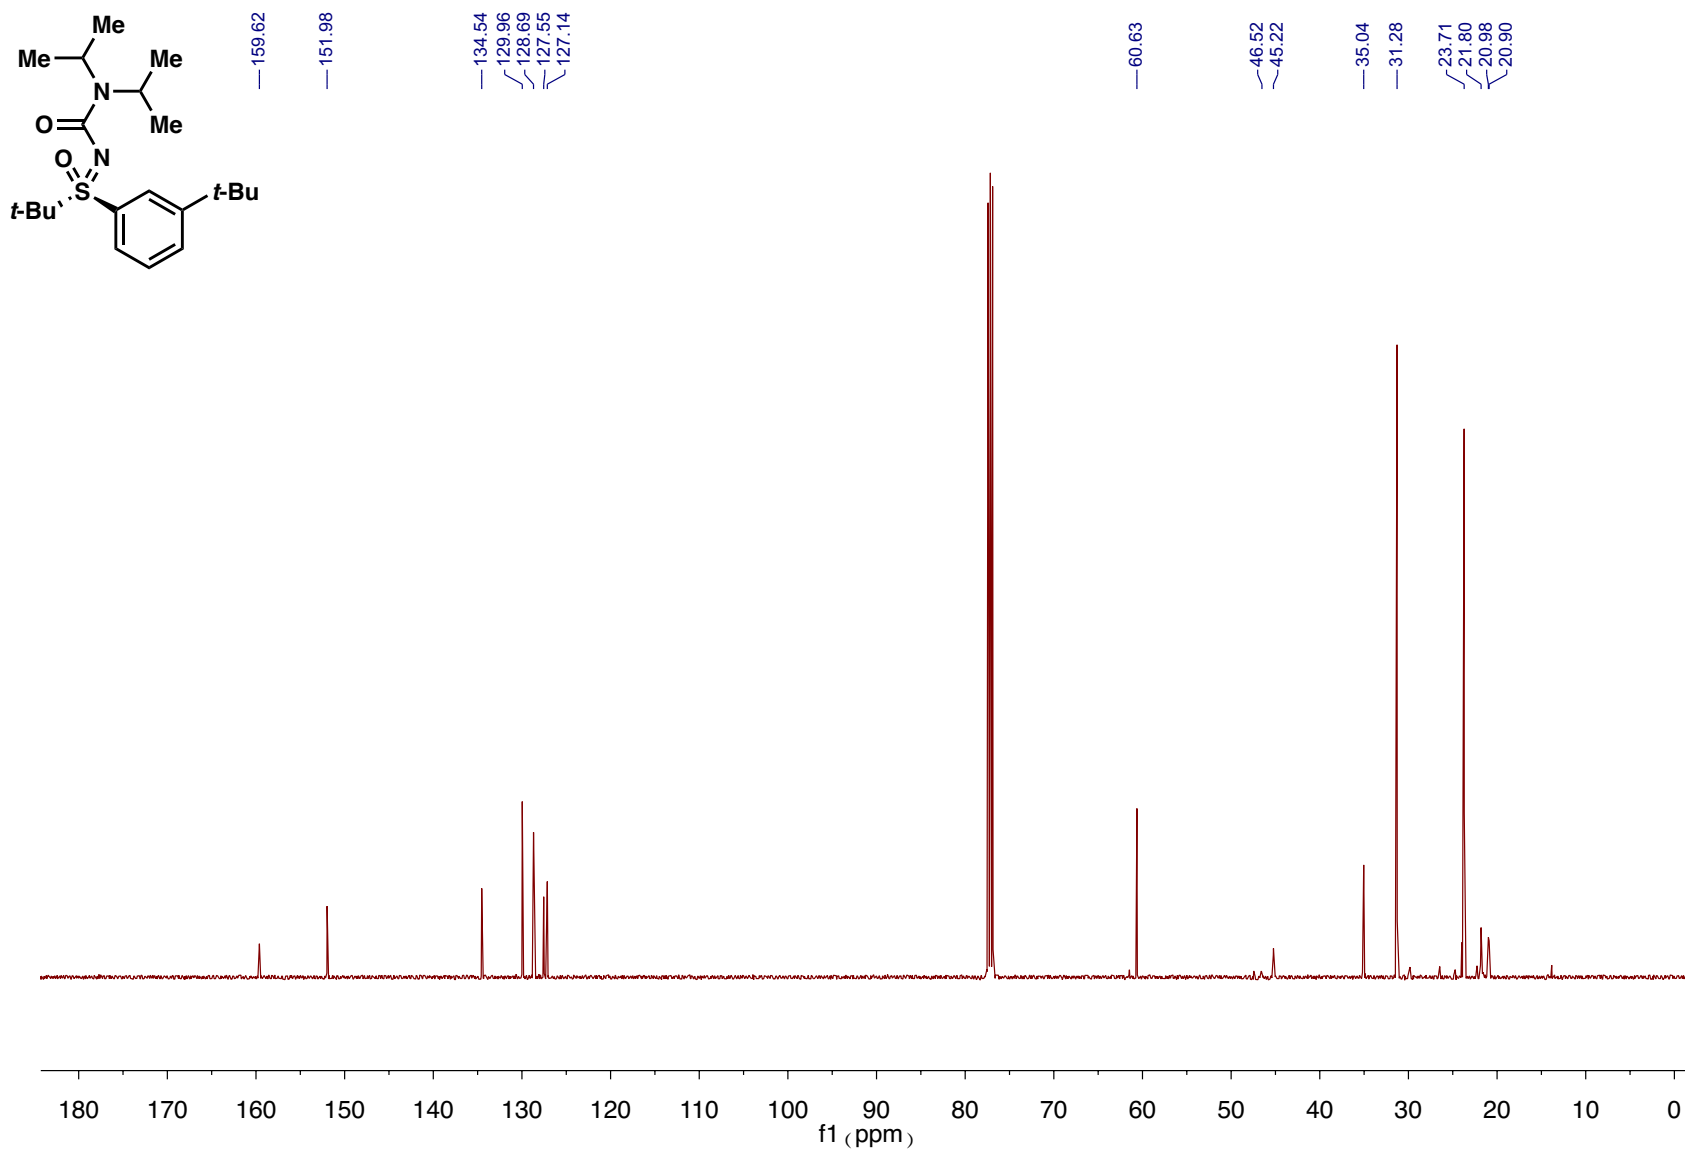

**<sup>1</sup>H NMR of compound 2o:**

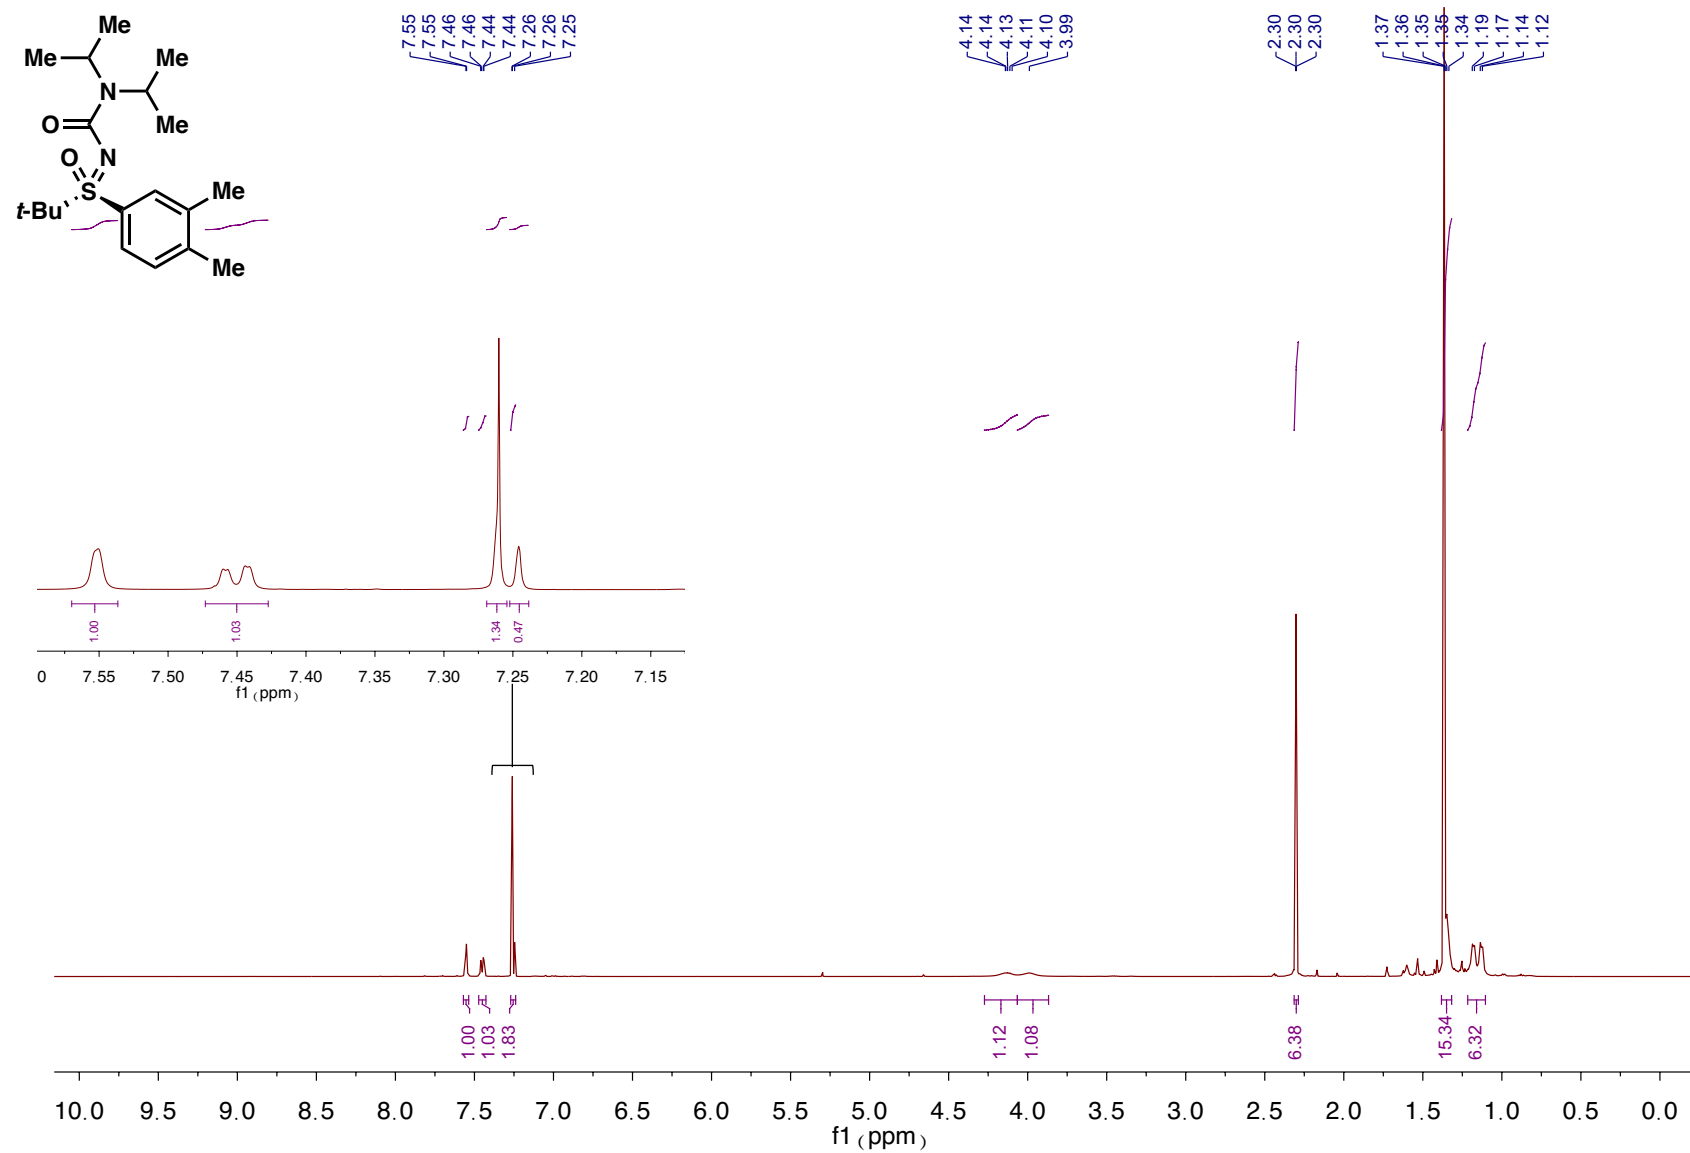

**$^{13}\text{C}$  NMR of compound 2o:**

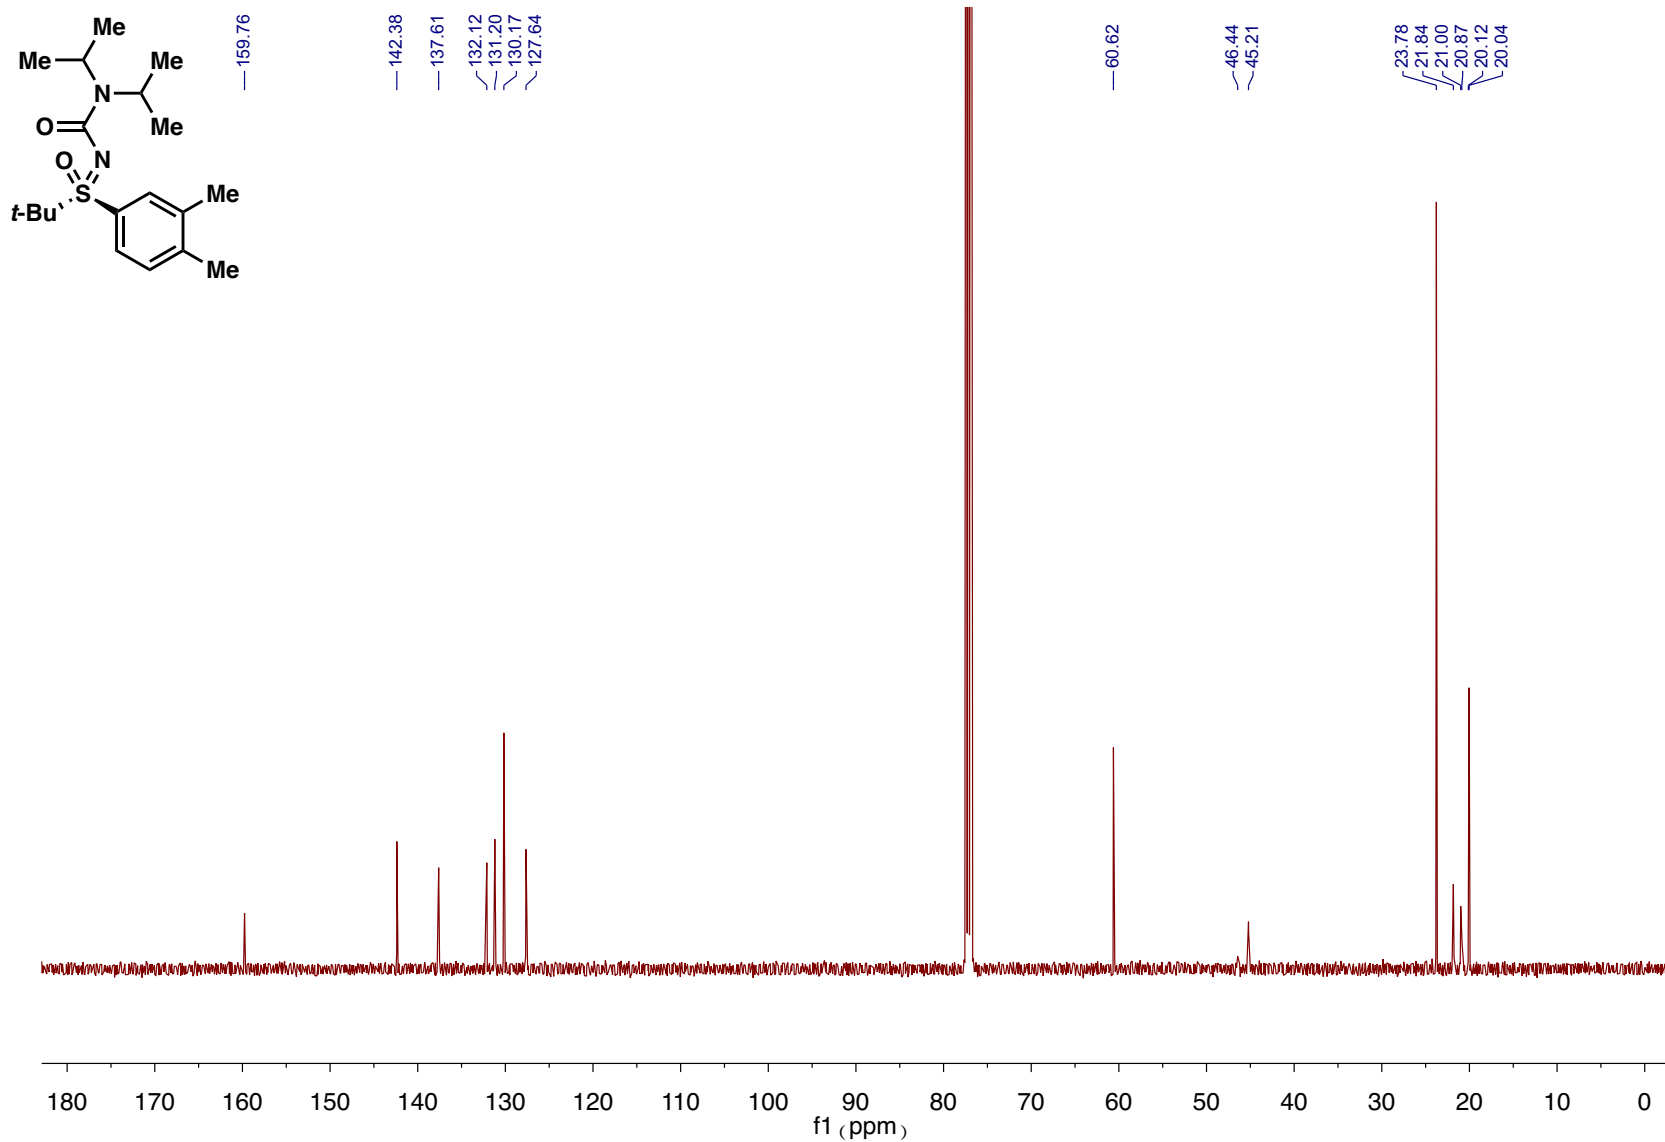

**<sup>1</sup>H NMR of compound 2p:**

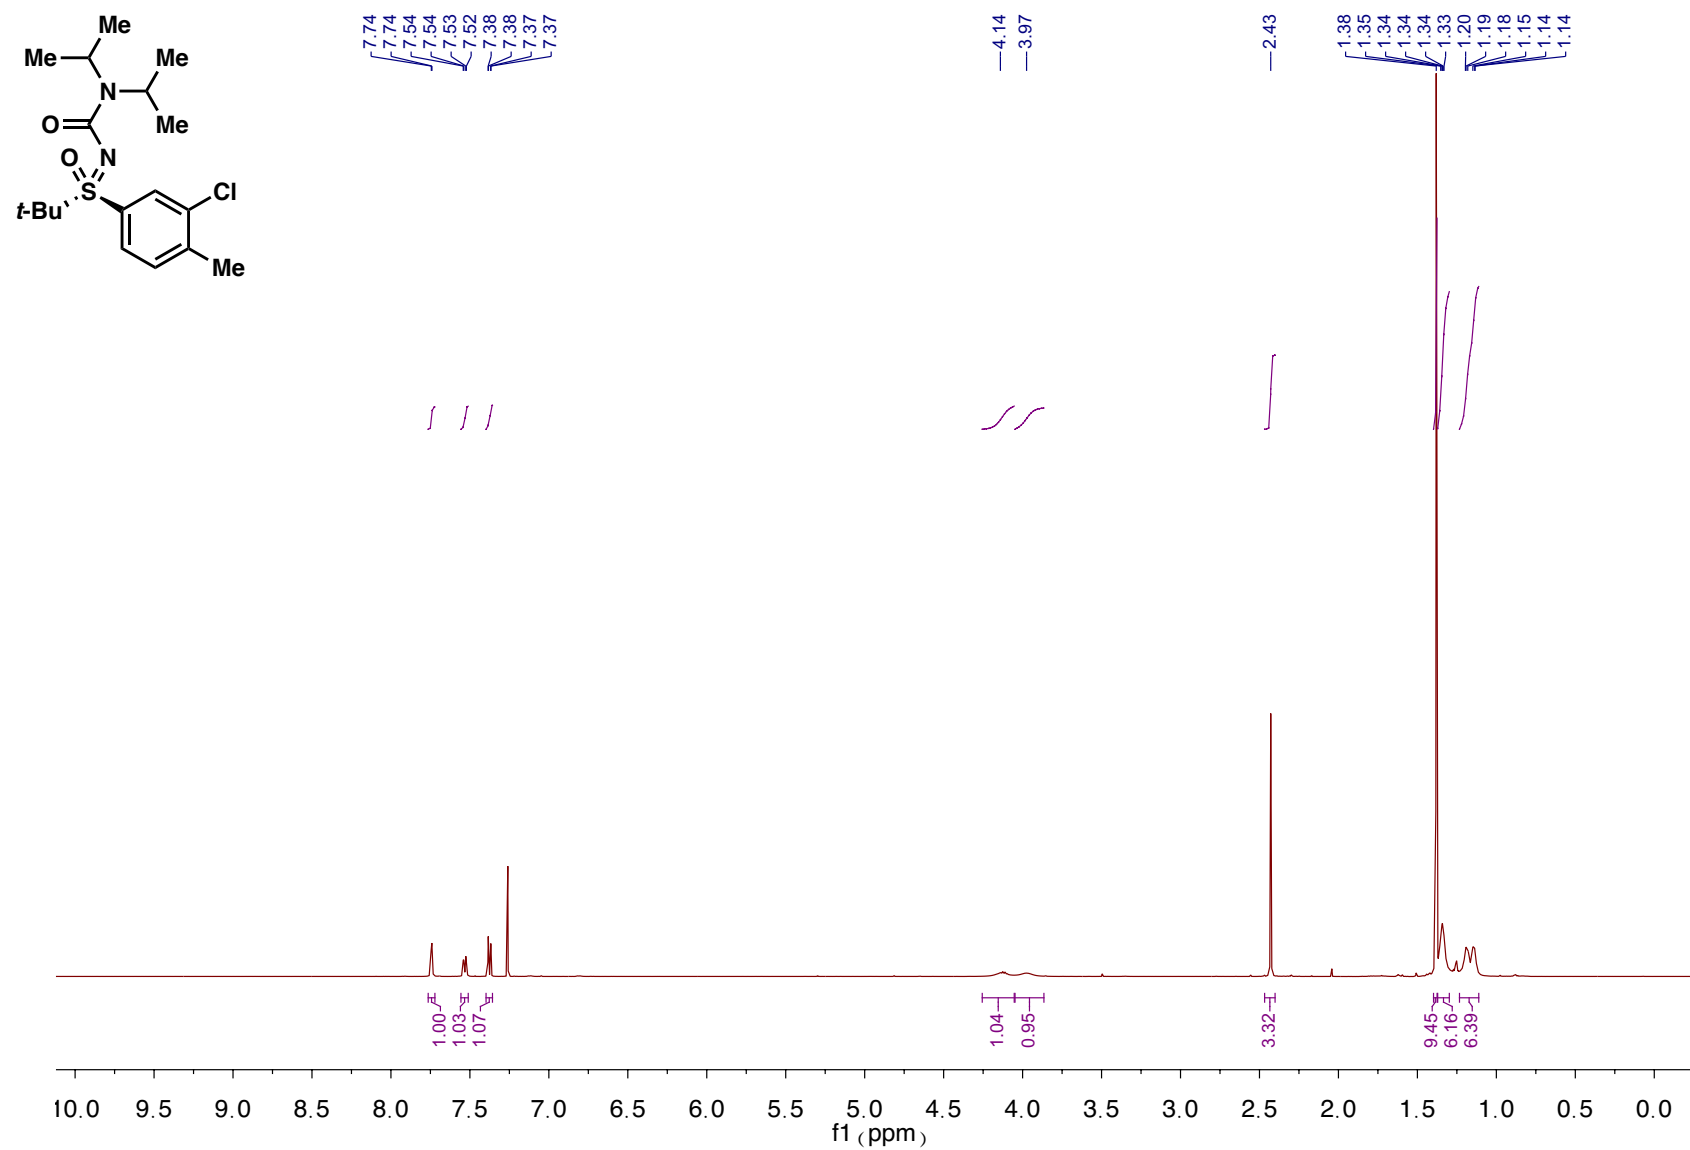

**$^{13}\text{C}$  NMR of compound 2p:**

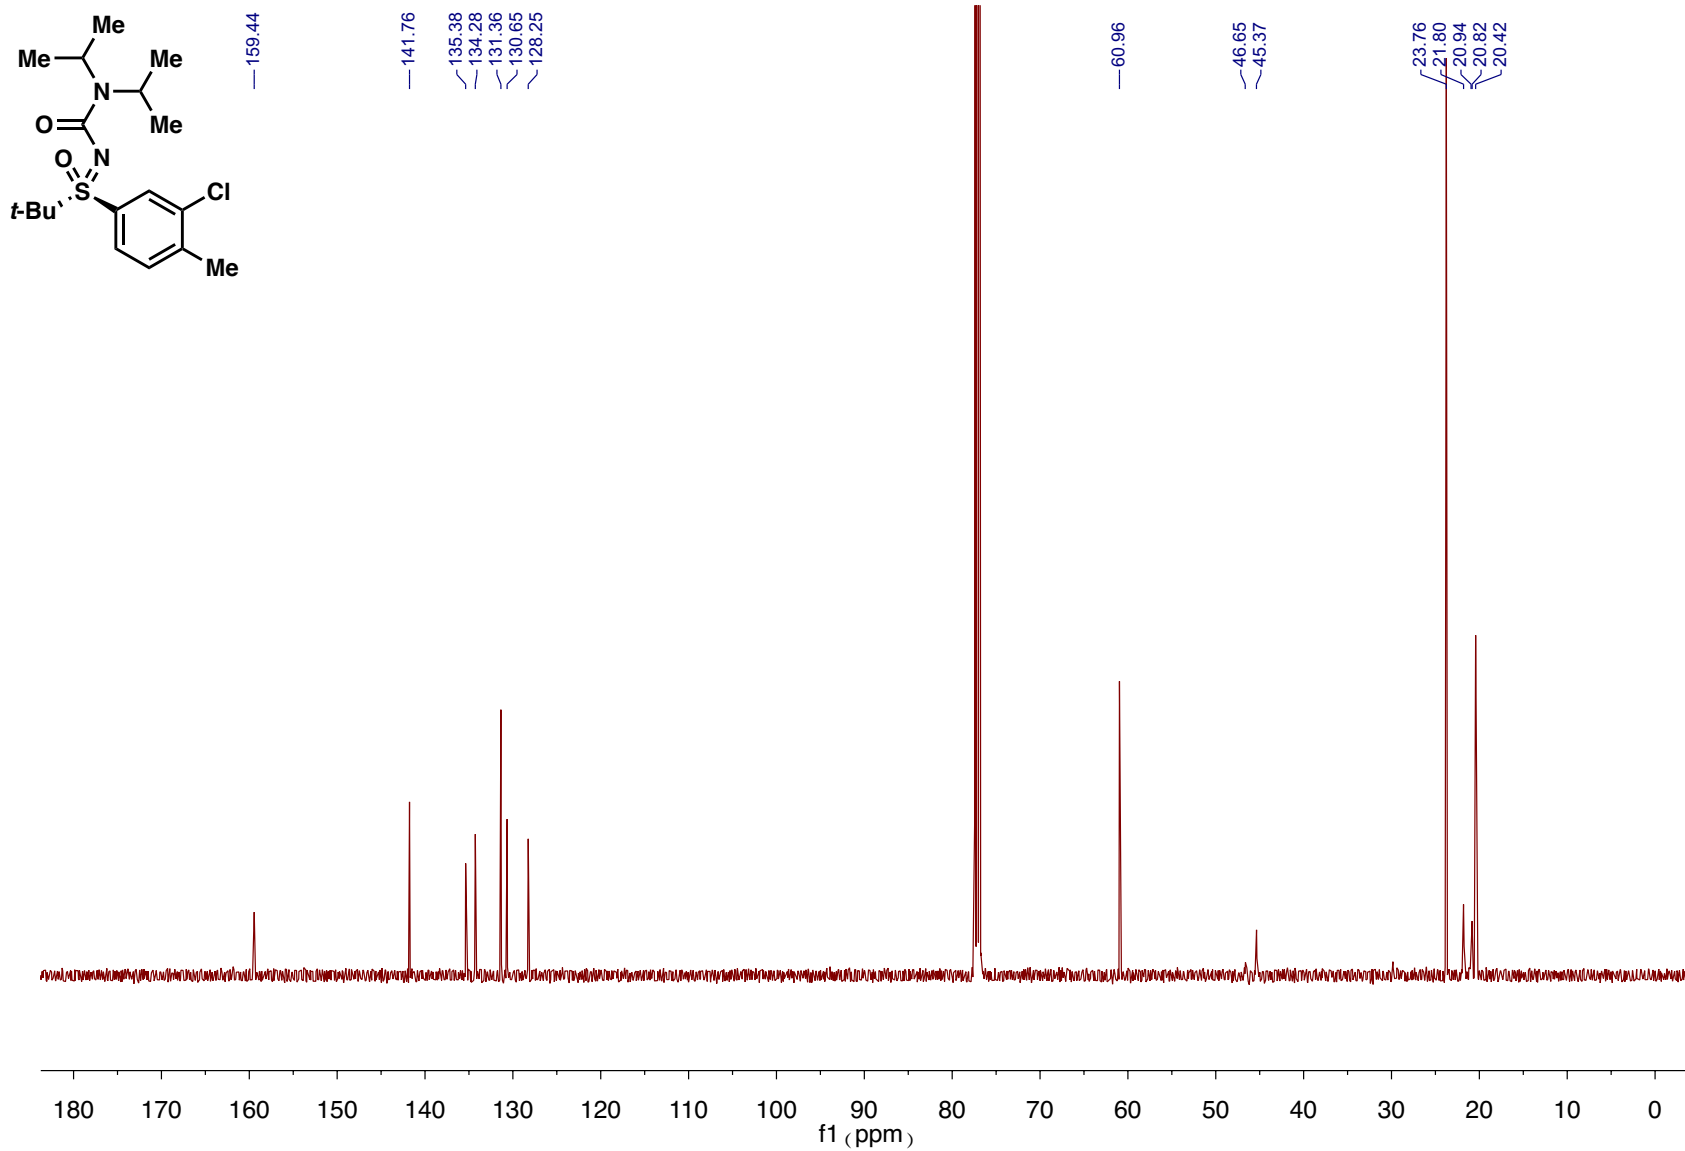

**<sup>1</sup>H NMR of compound 2q:**

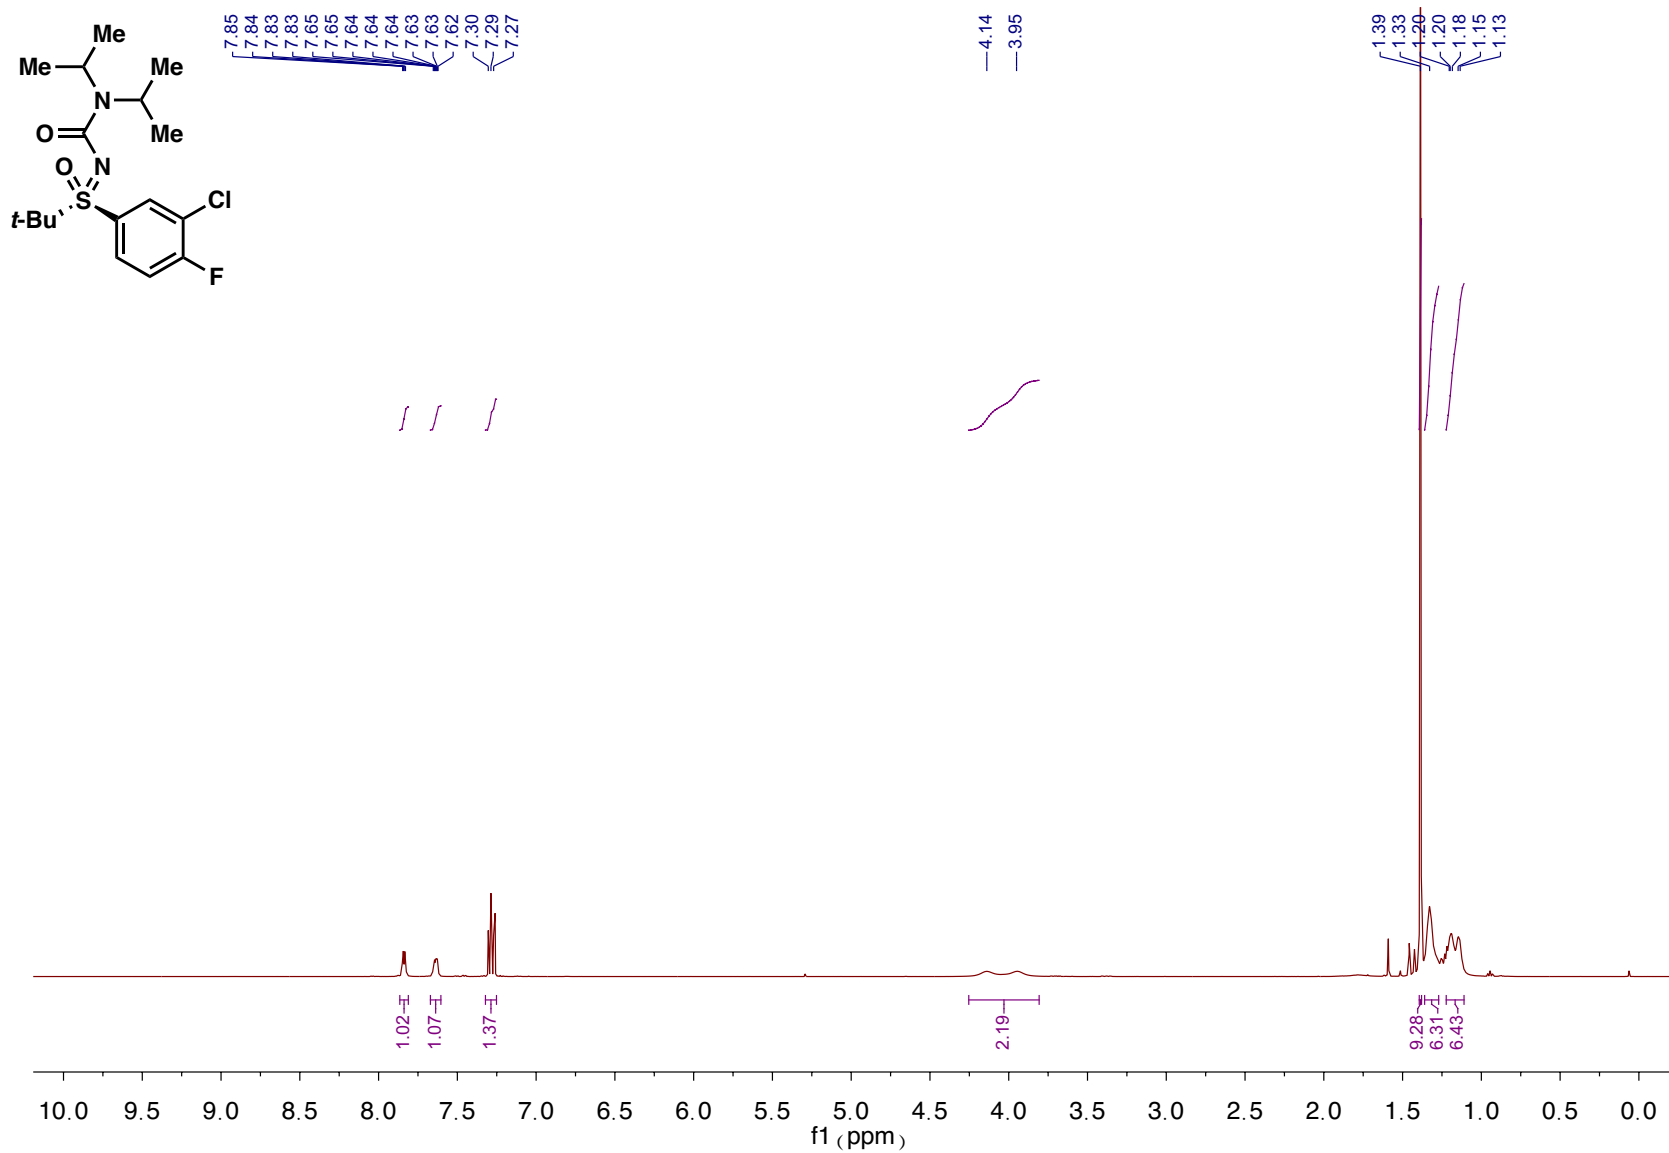

**$^{13}\text{C}$  NMR of compound 2q:**

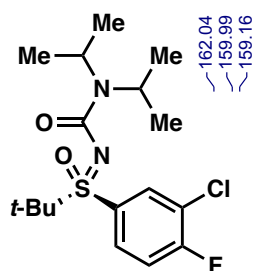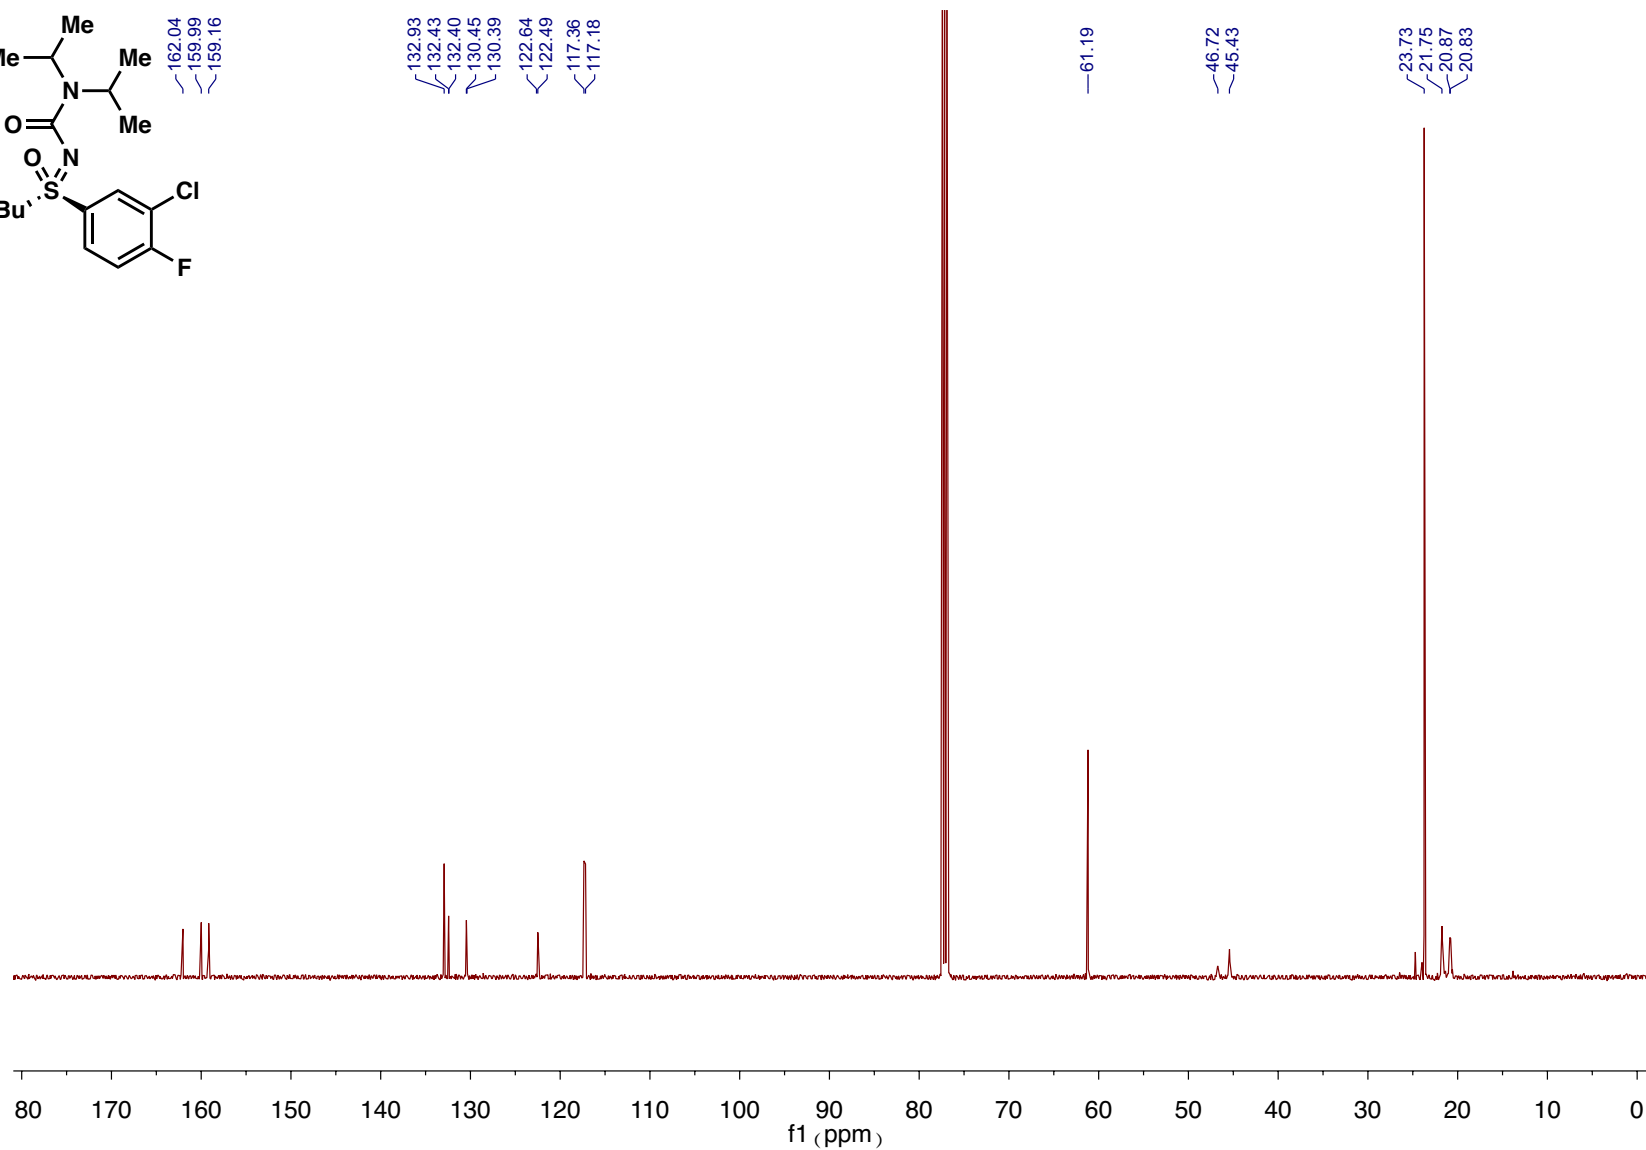

**$^{19}\text{F}$  NMR of compound 2q:**

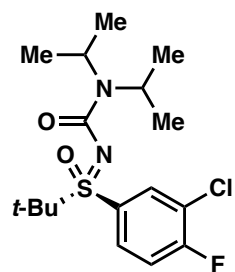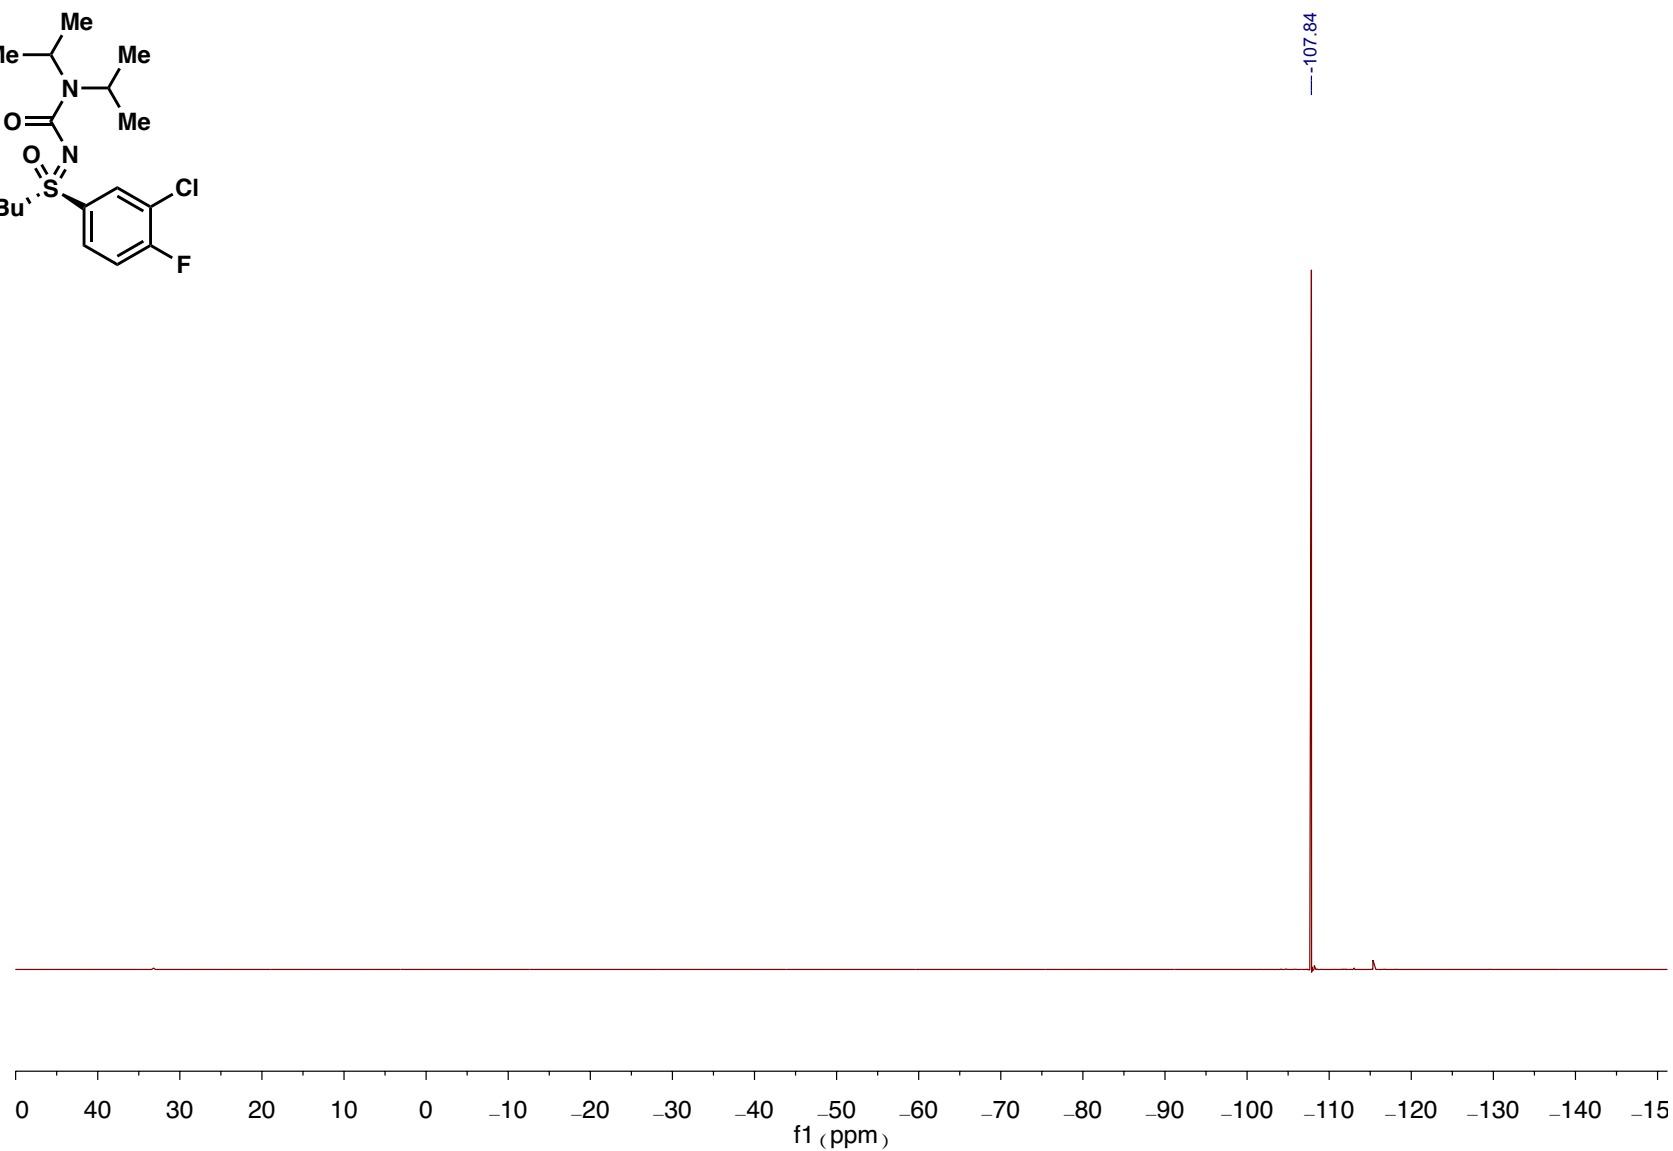

**<sup>1</sup>H NMR of compound 2r:**

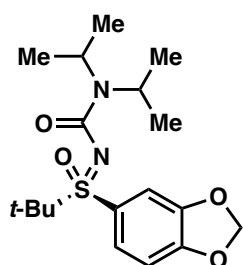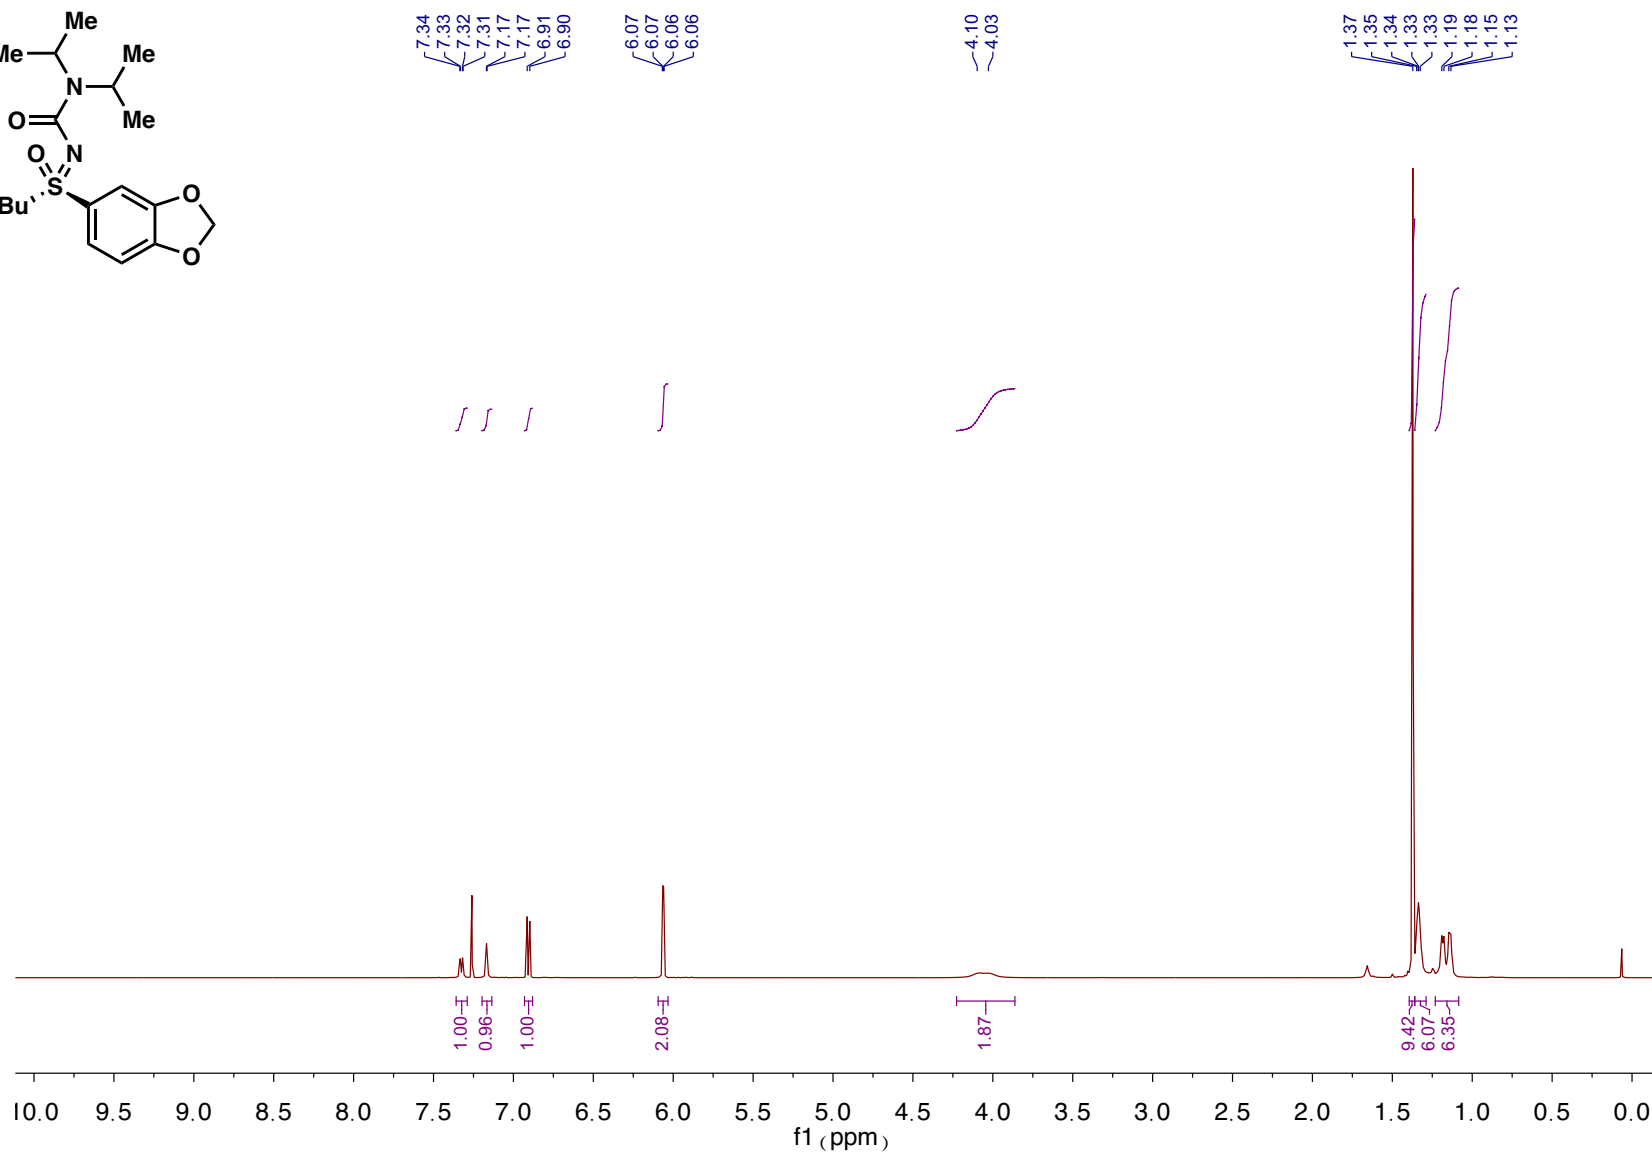

**$^{13}\text{C}$  NMR of compound 2r:**

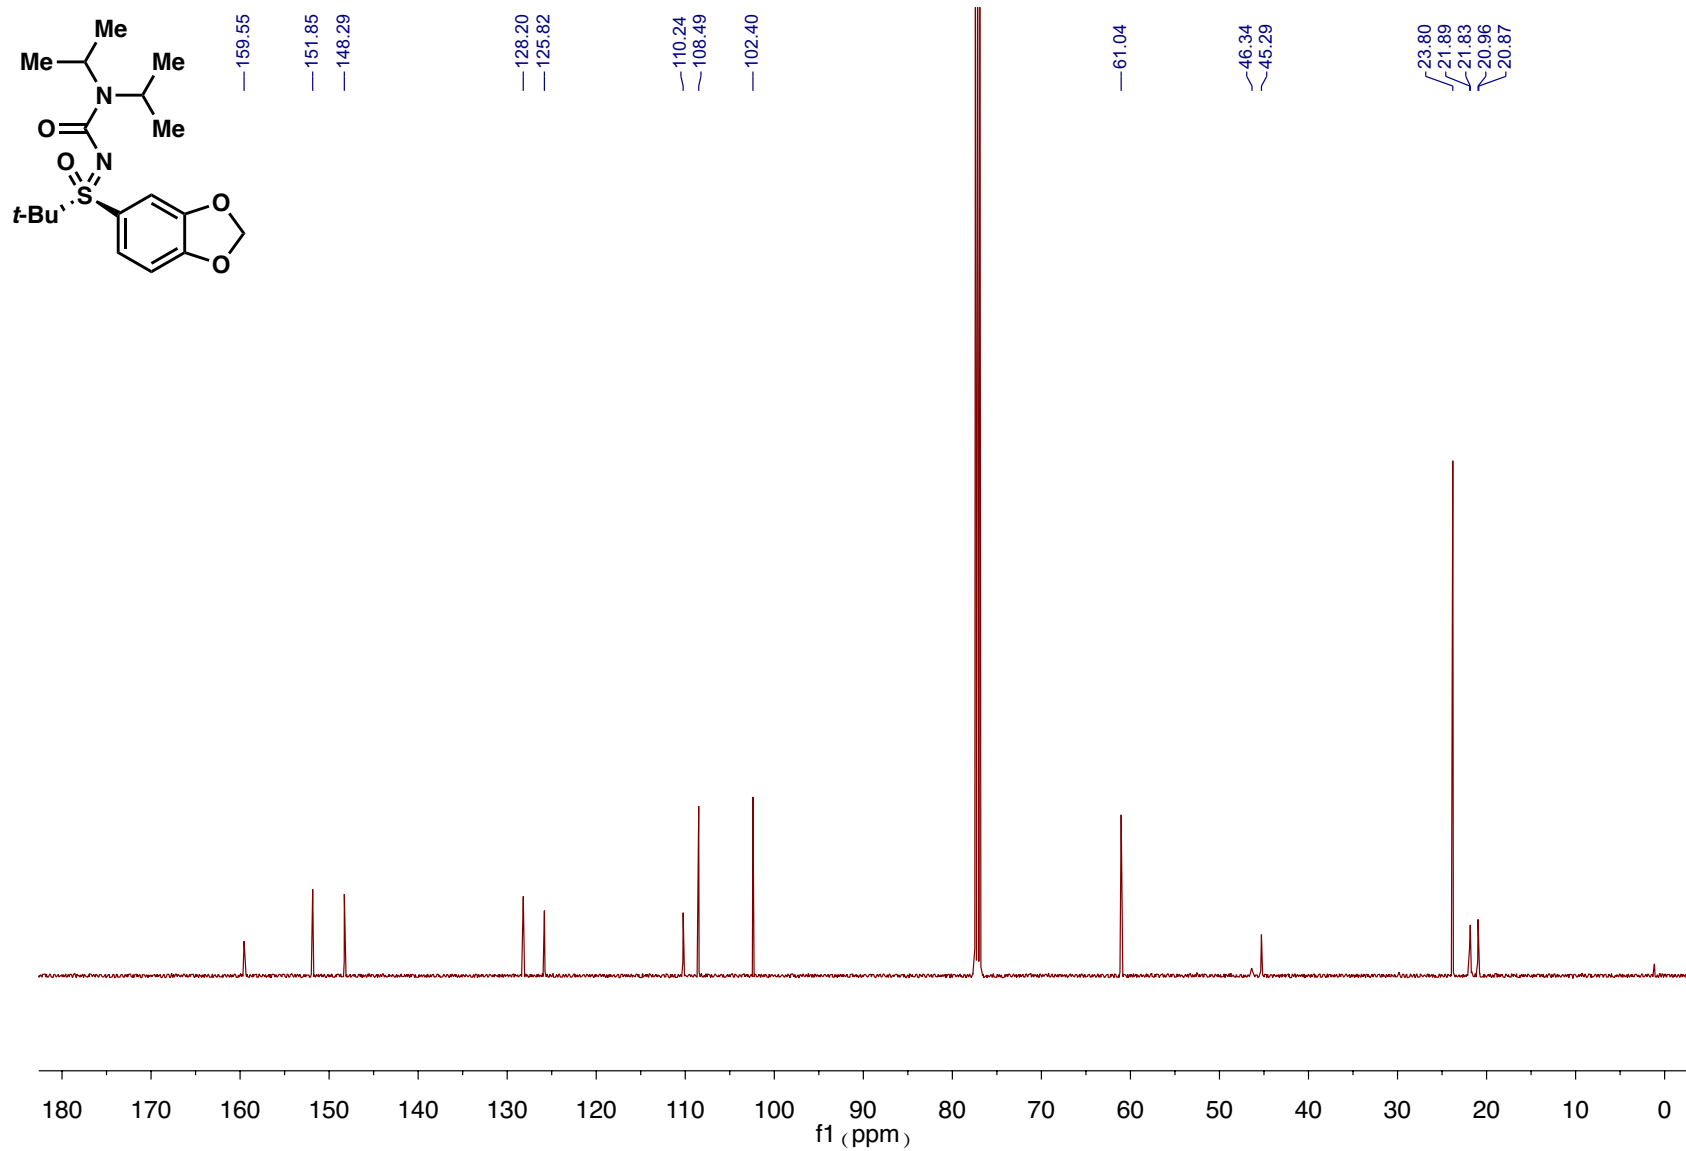

**<sup>1</sup>H NMR of compound 2s:**

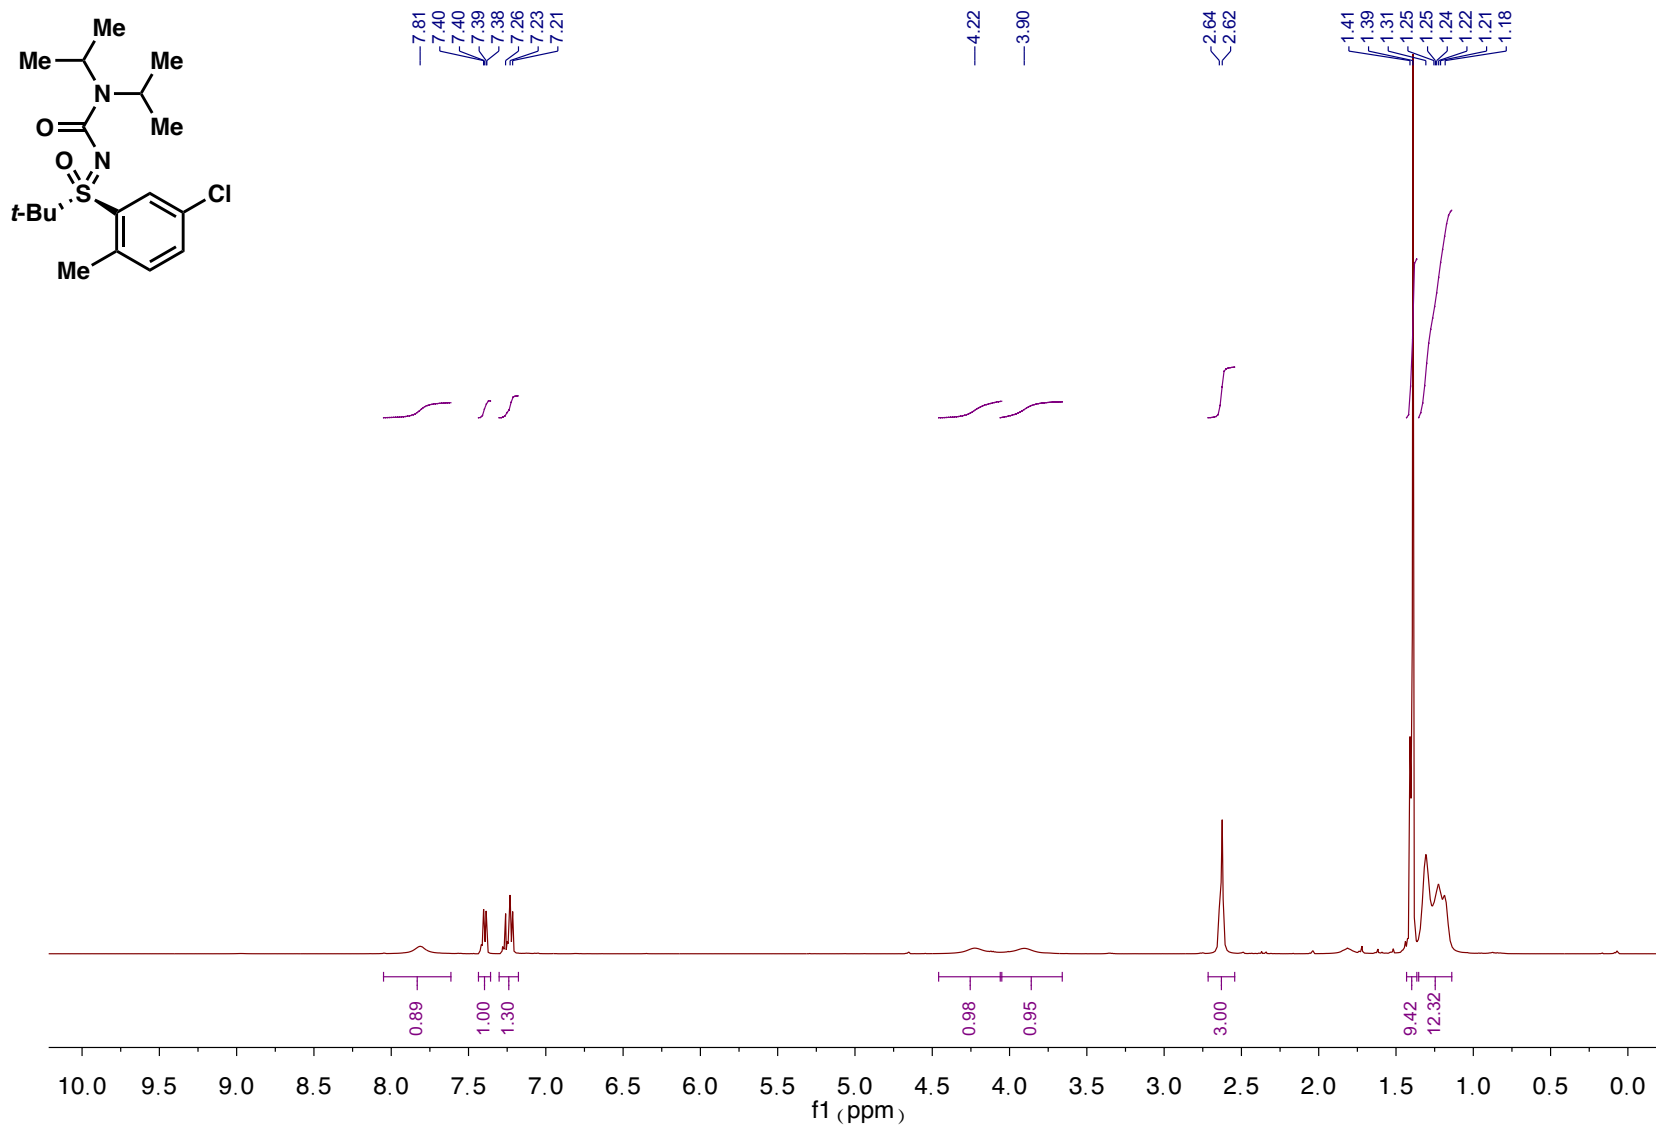

**$^{13}\text{C}$  NMR of compound 2s:**

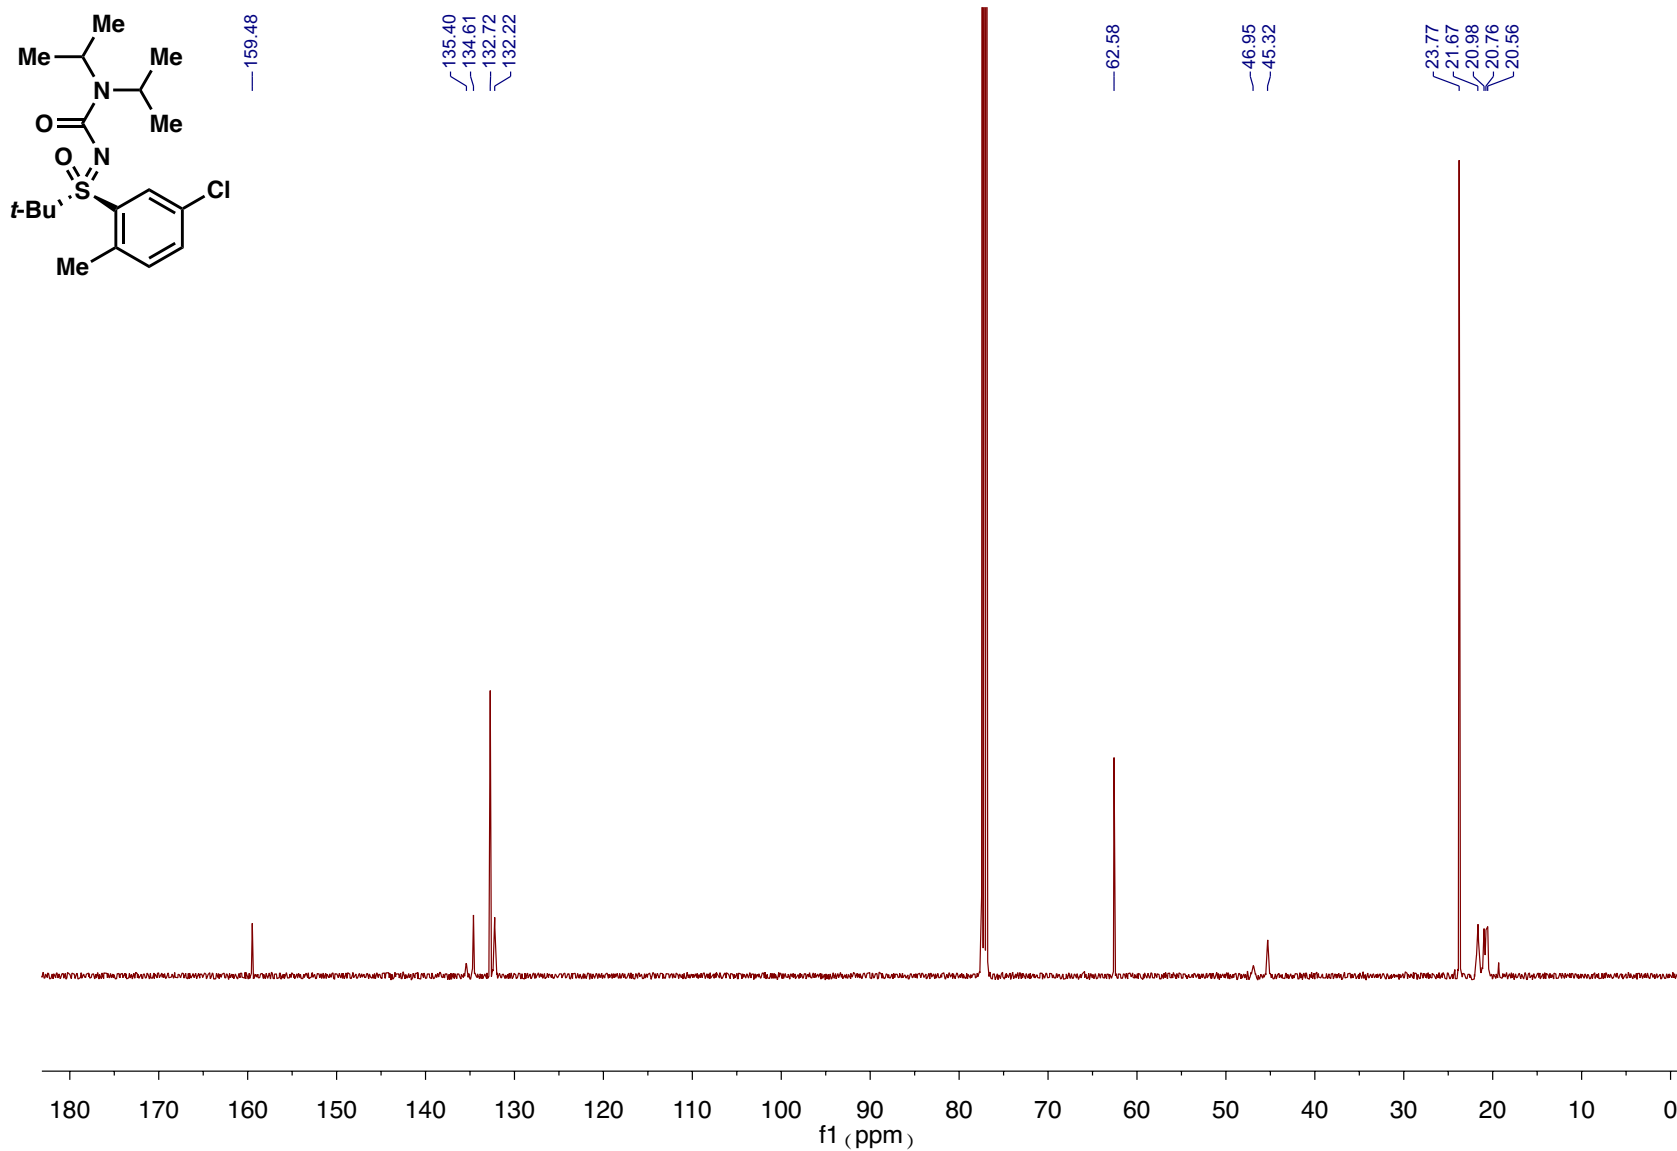

**<sup>1</sup>H NMR of compound 2t:**

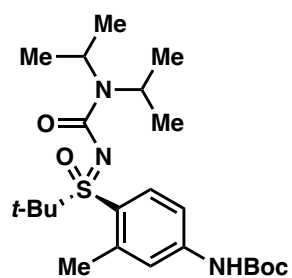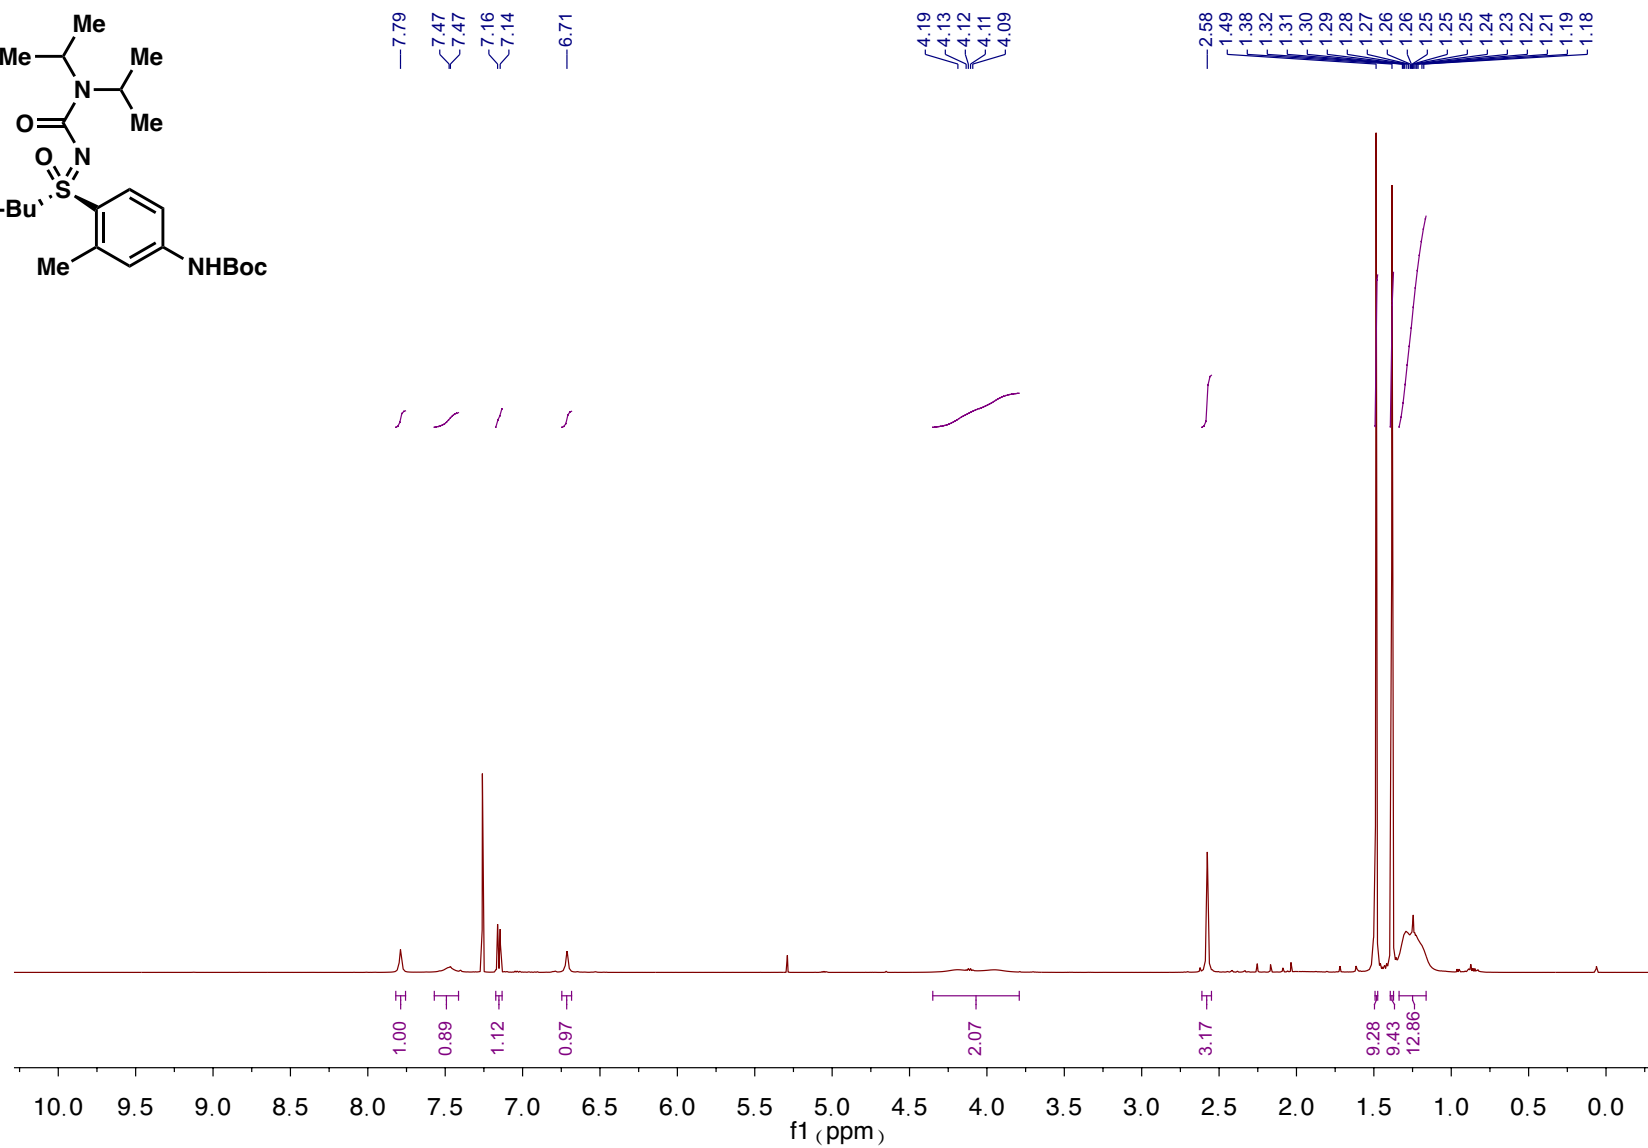

**$^{13}\text{C}$  NMR of compound 2t:**

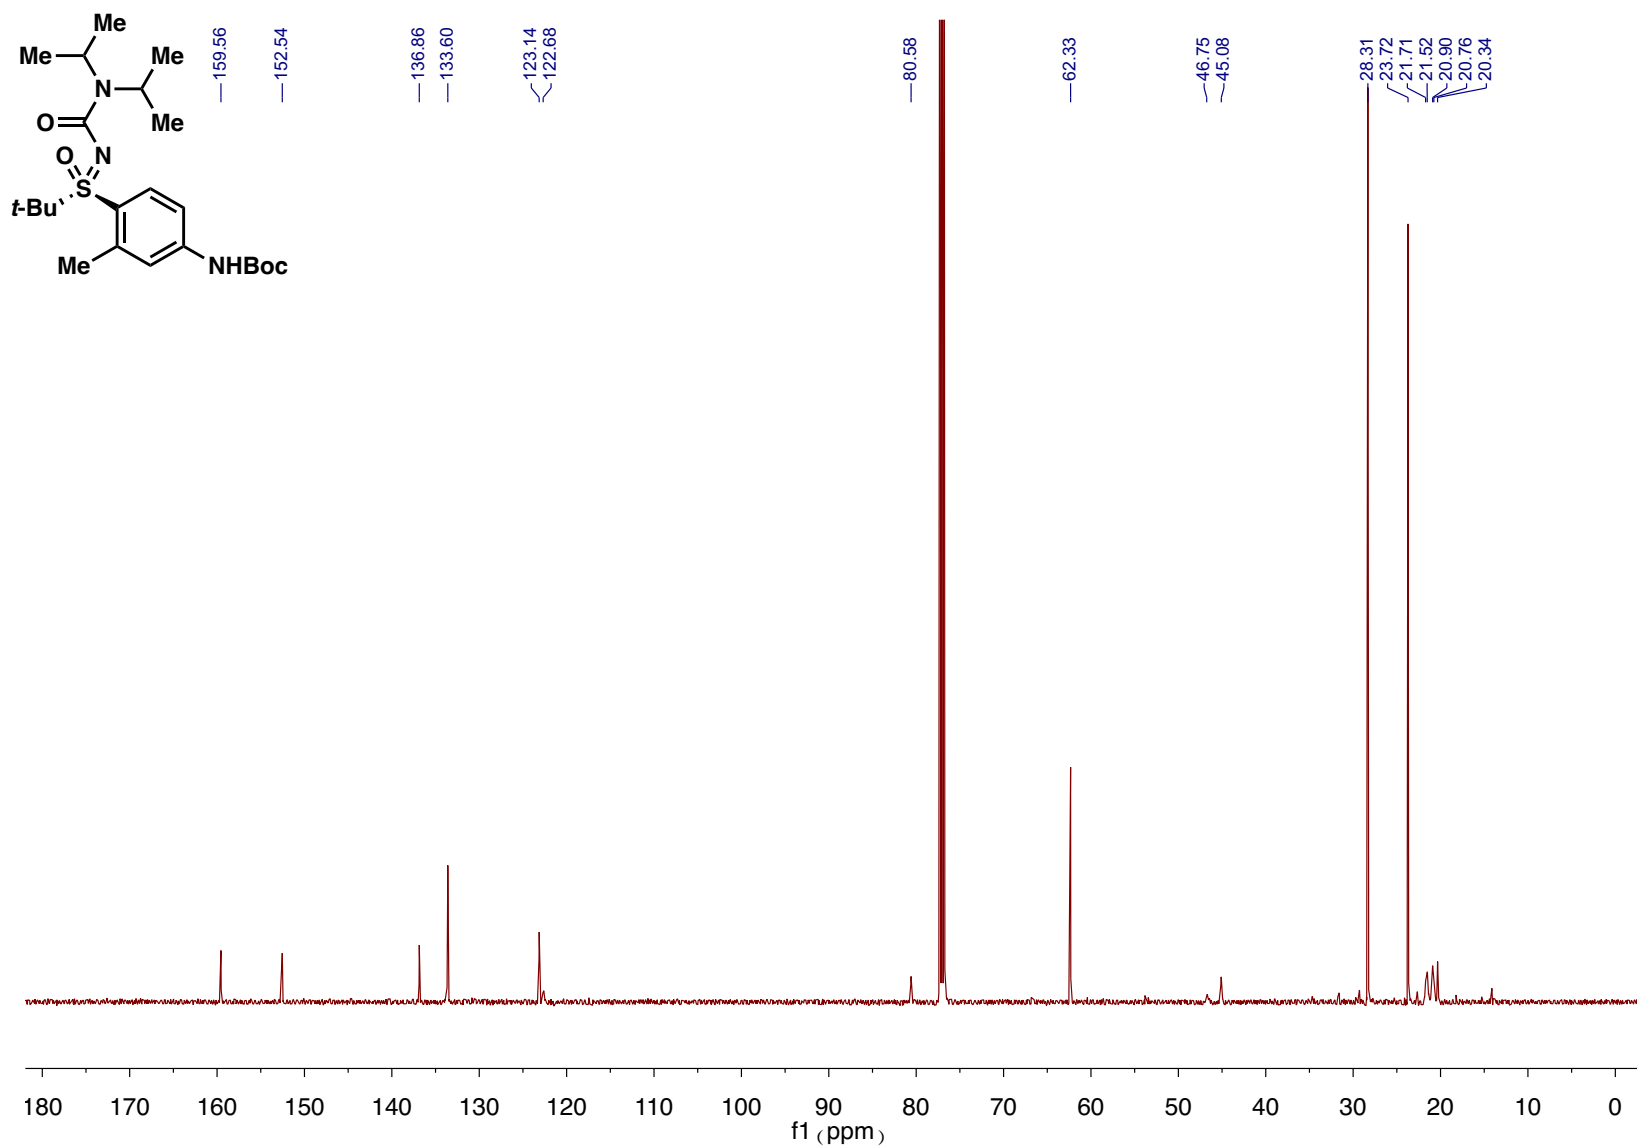

**<sup>1</sup>H NMR of compound 2u:**

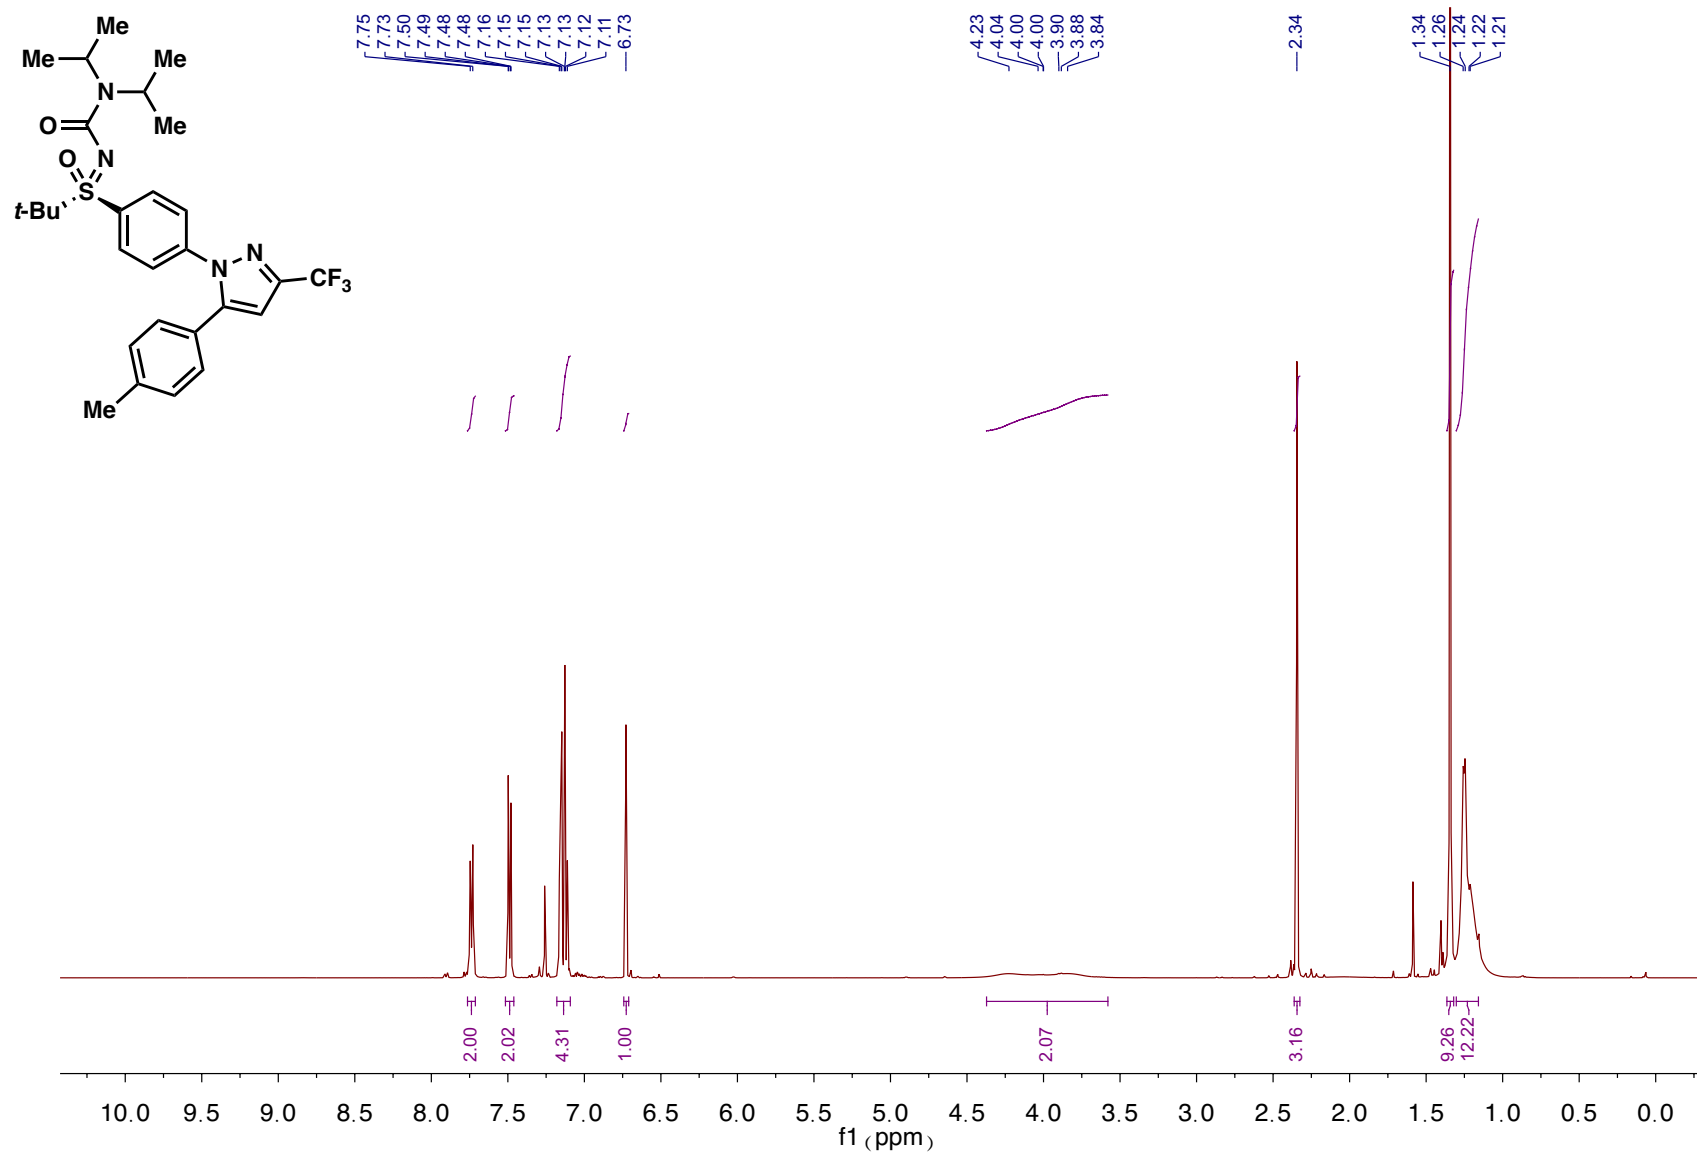

**<sup>13</sup>C NMR of compound 2u:**

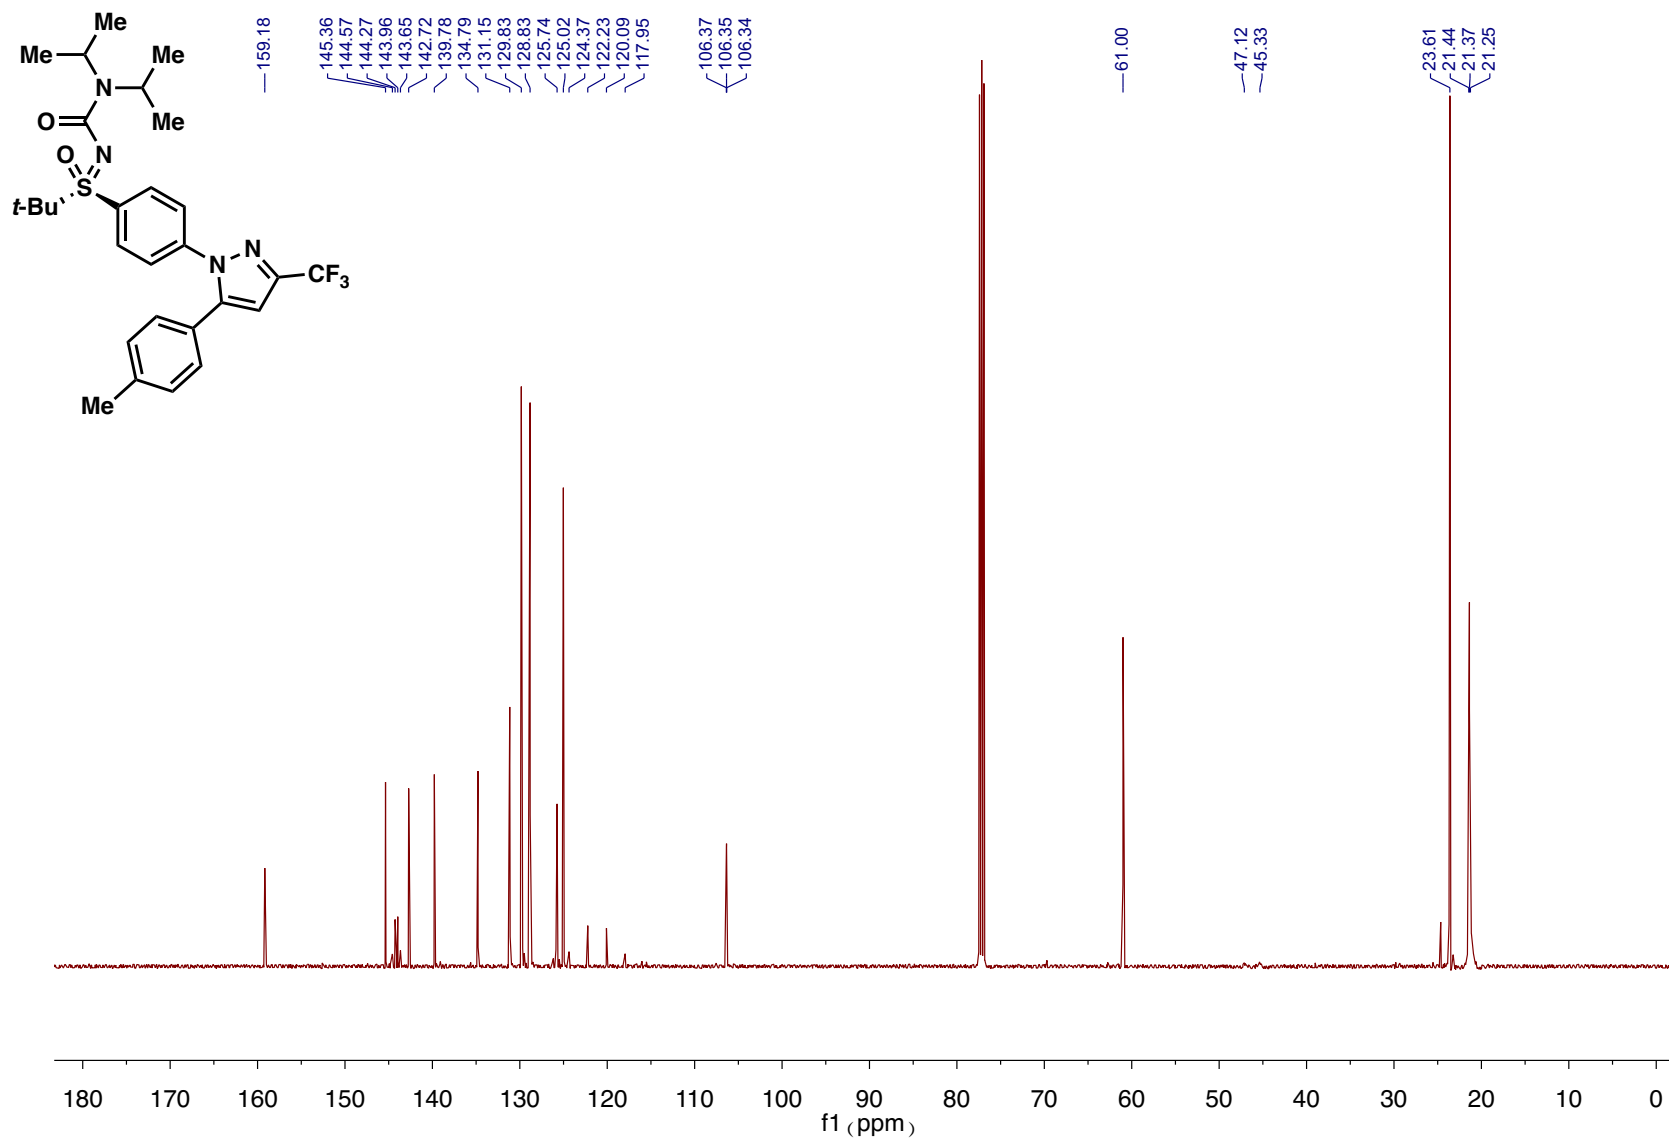

**<sup>19</sup>F NMR of compound 2u:**

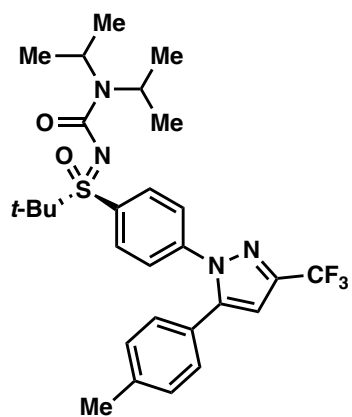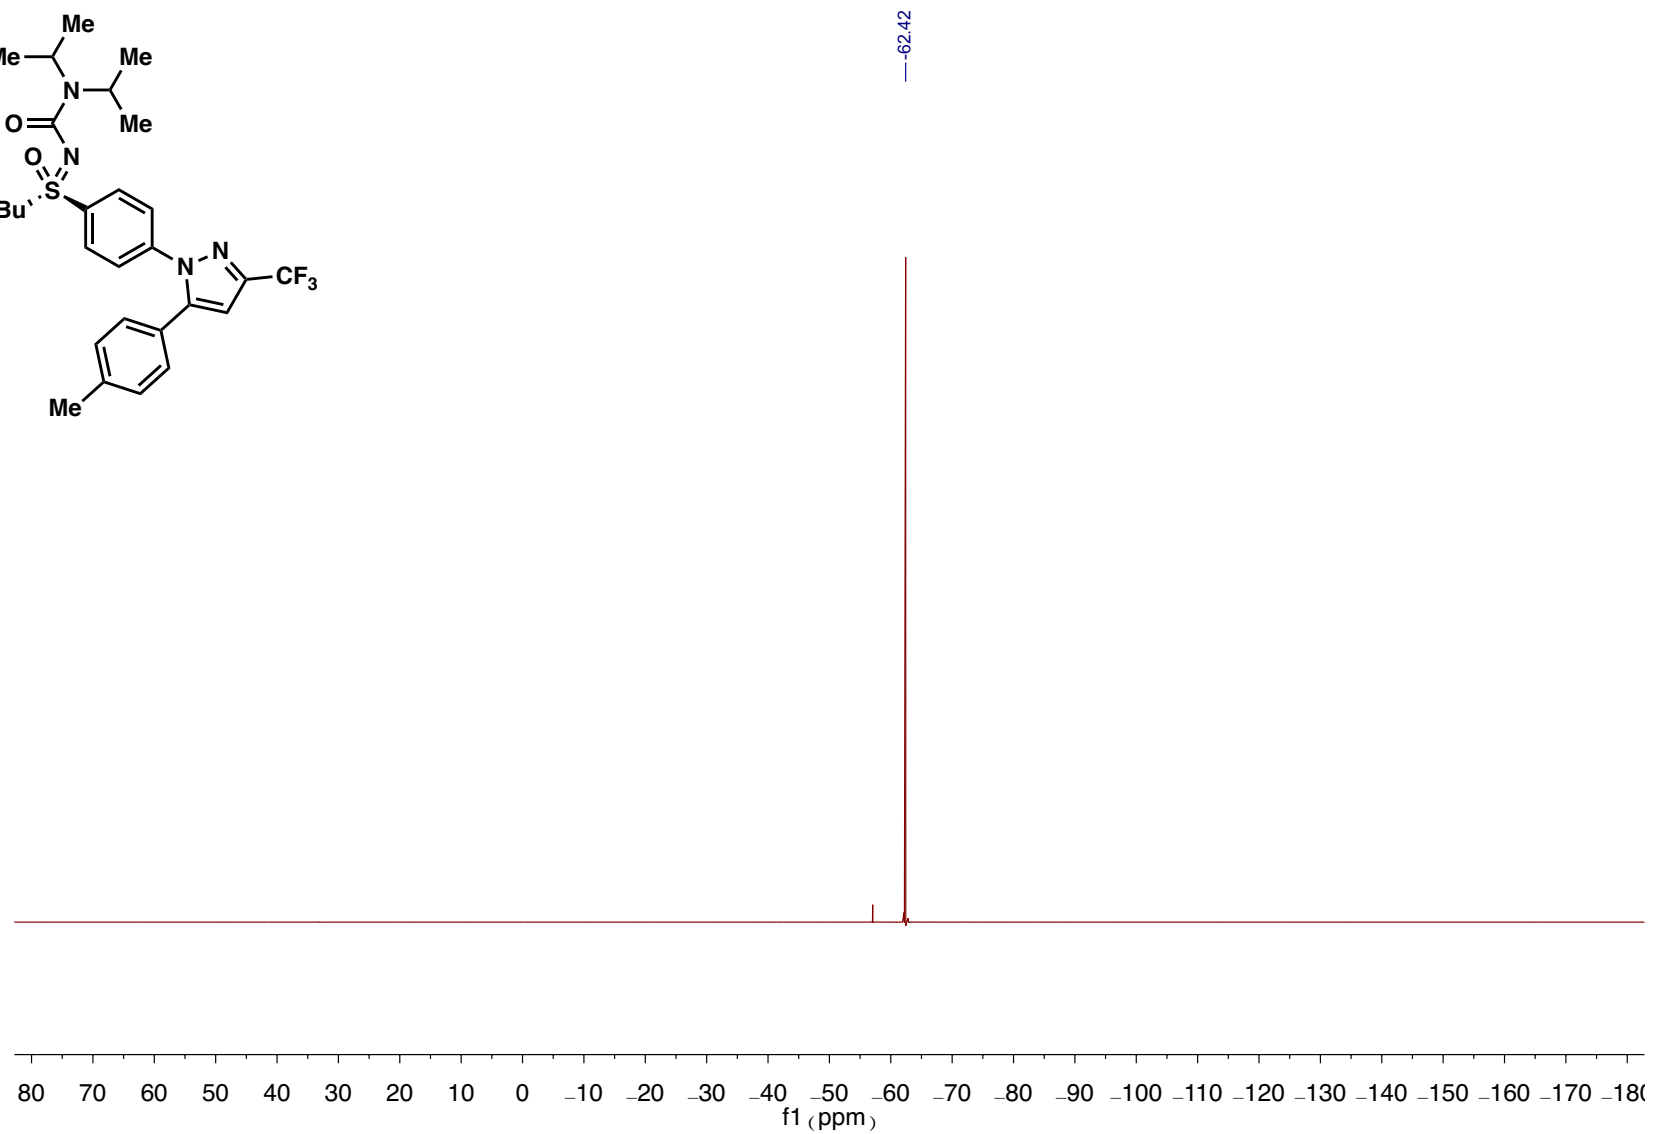

**<sup>1</sup>H NMR of compound 2v:**

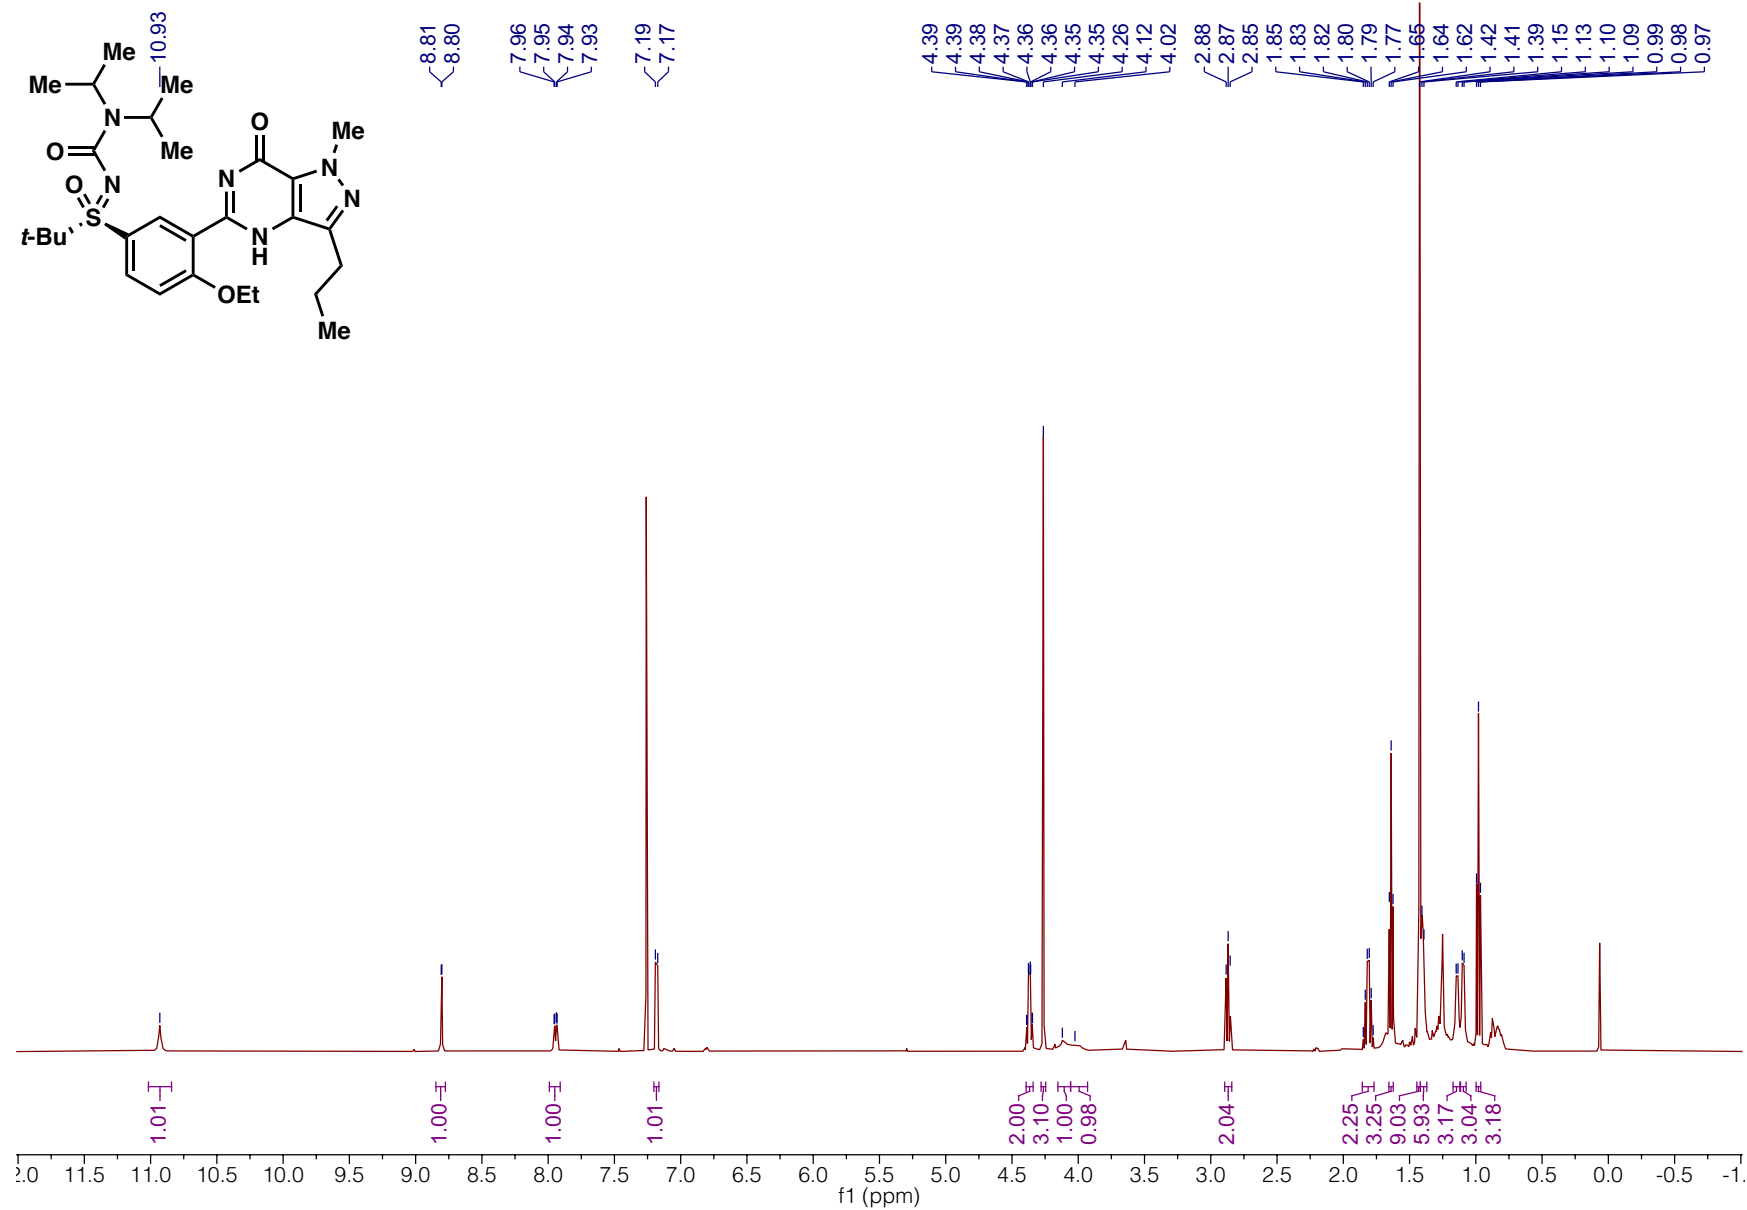

**<sup>13</sup>C NMR of compound 2v:**

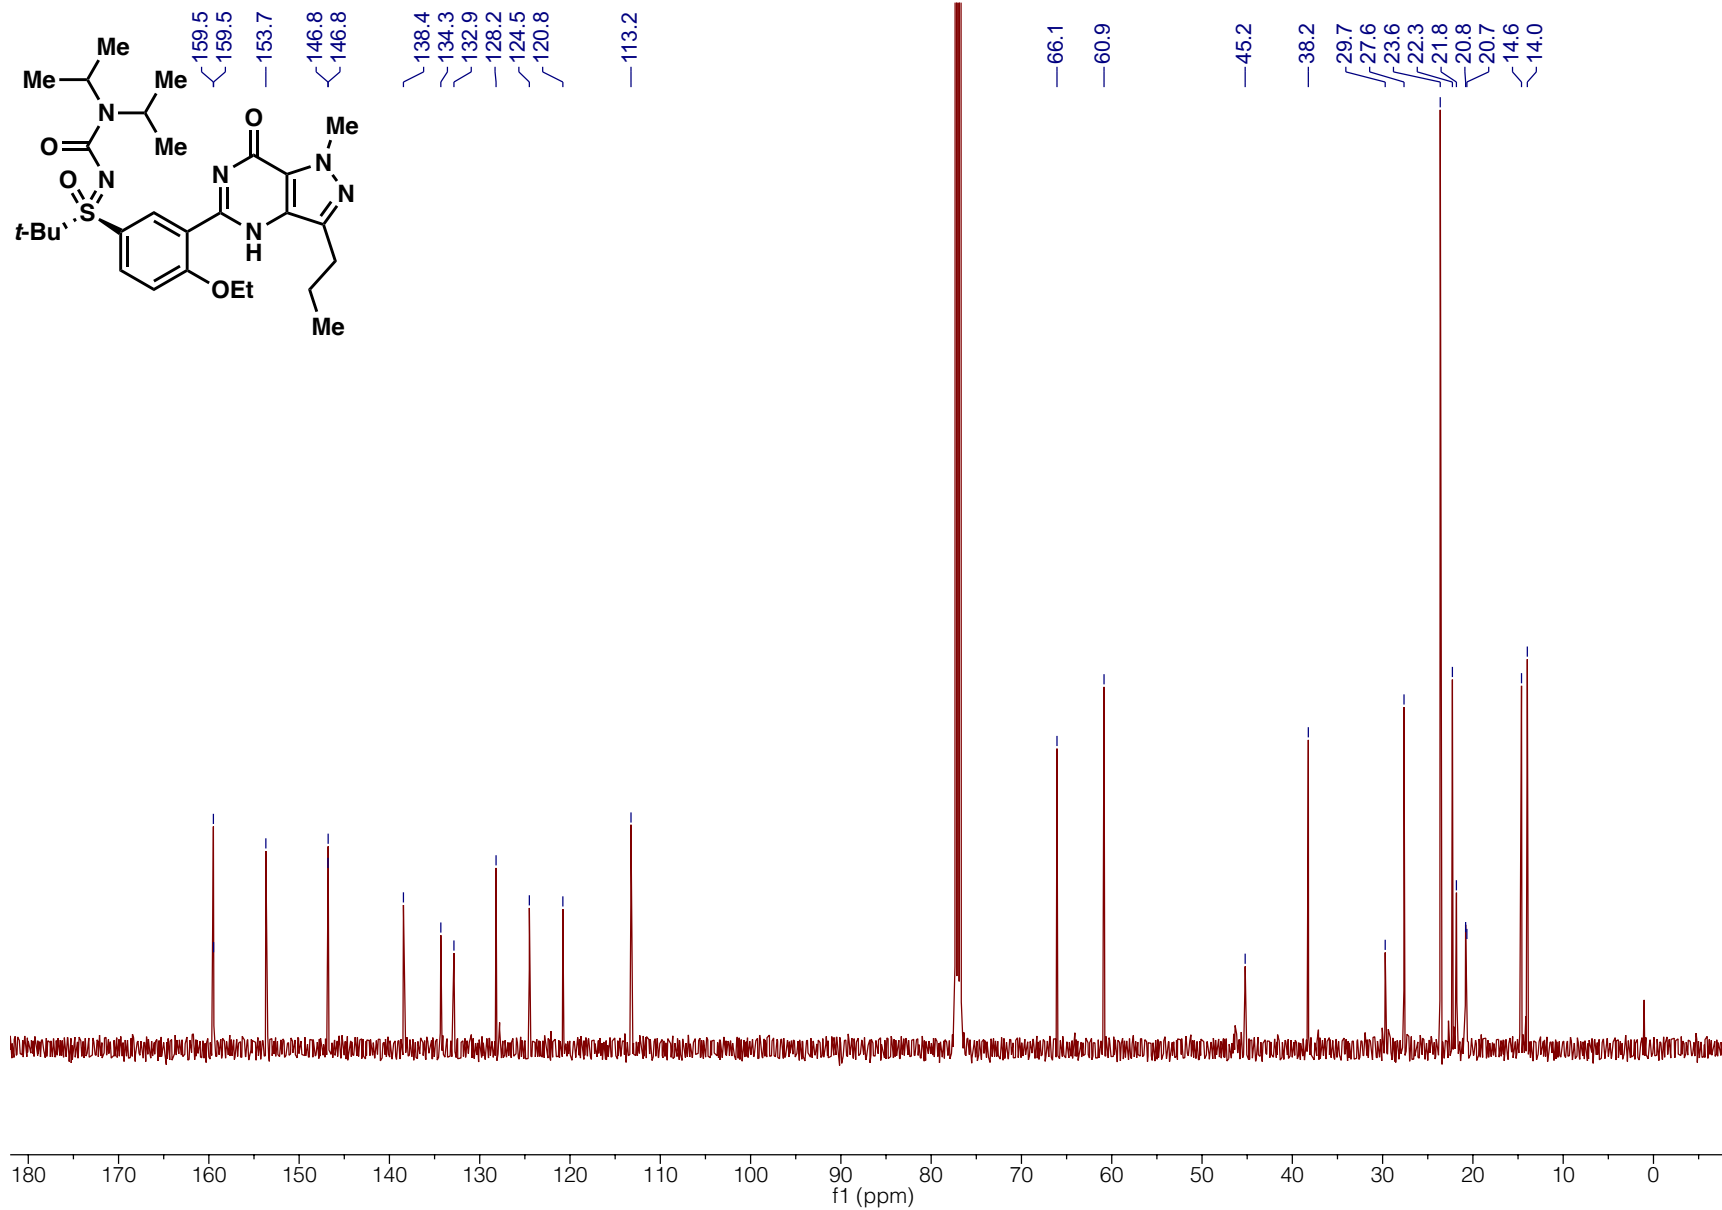

**<sup>1</sup>H NMR of compound 2w:**

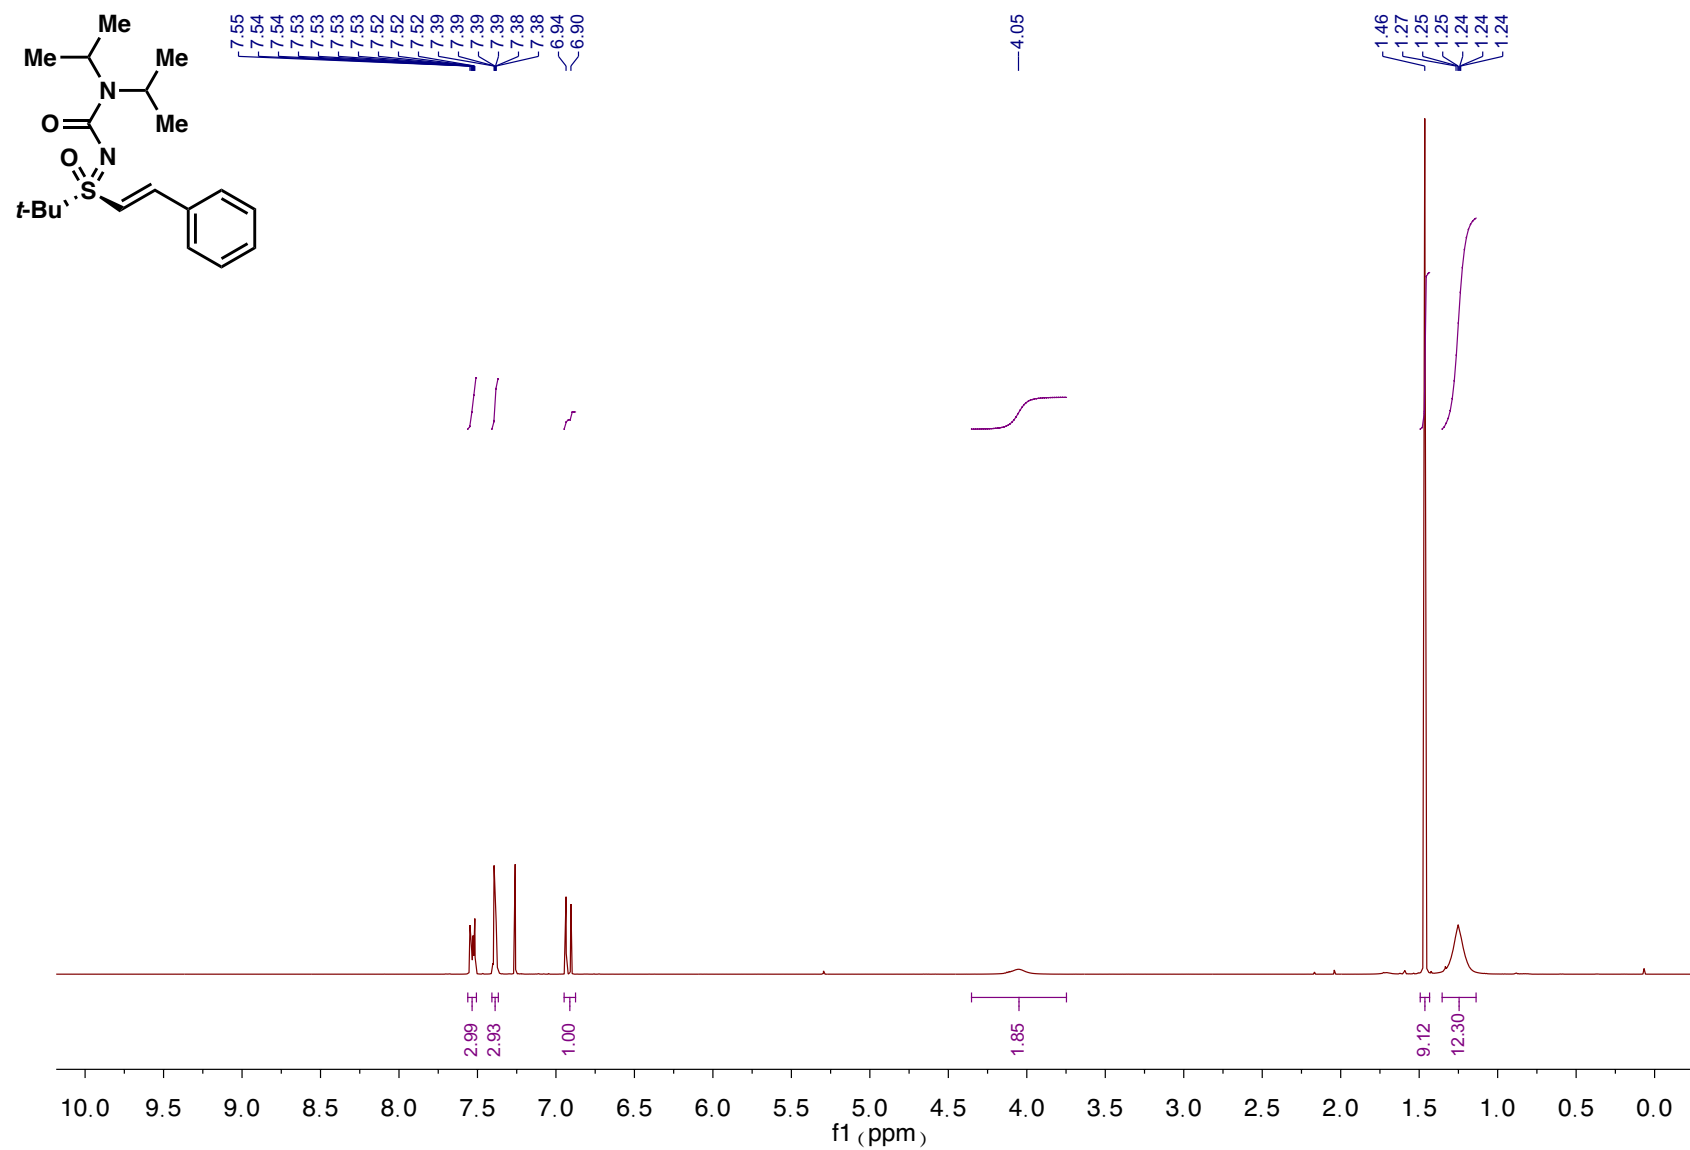

**$^{13}\text{C}$  NMR of compound 2w:**

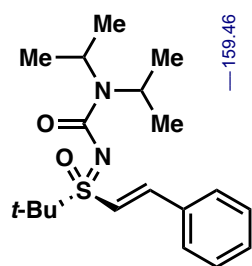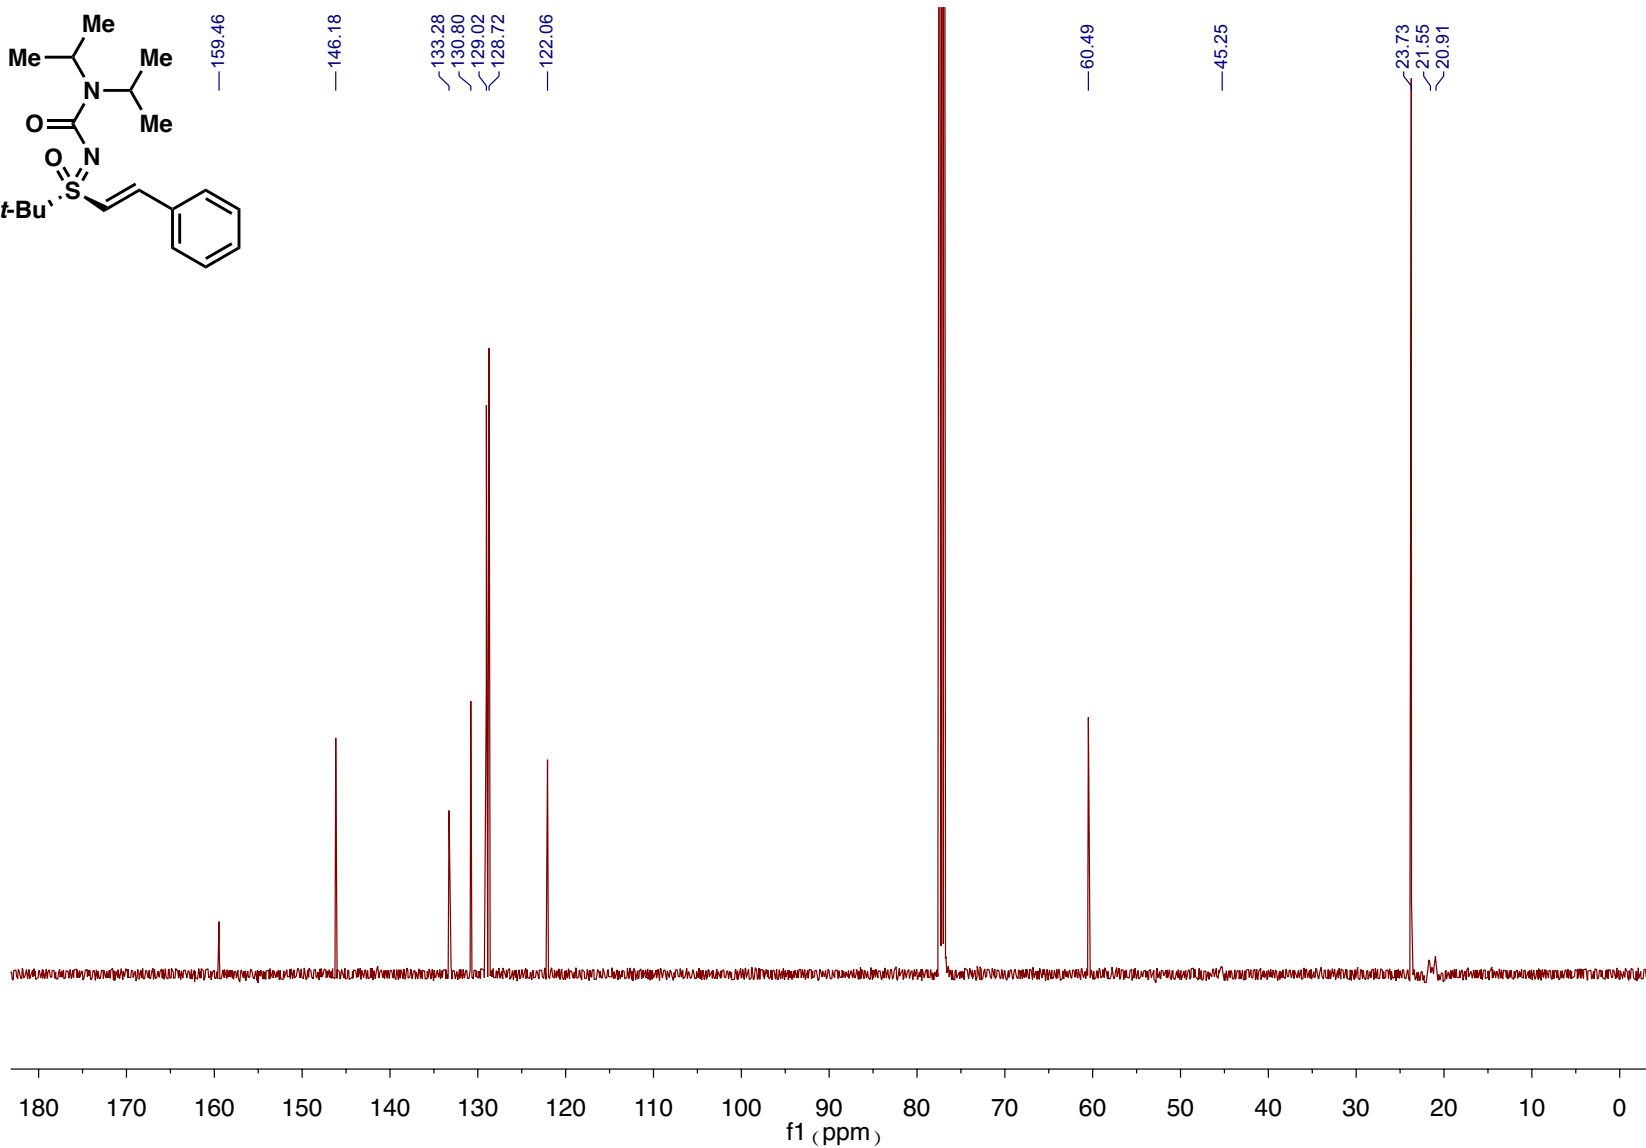

**<sup>1</sup>H NMR of compound 3a:**

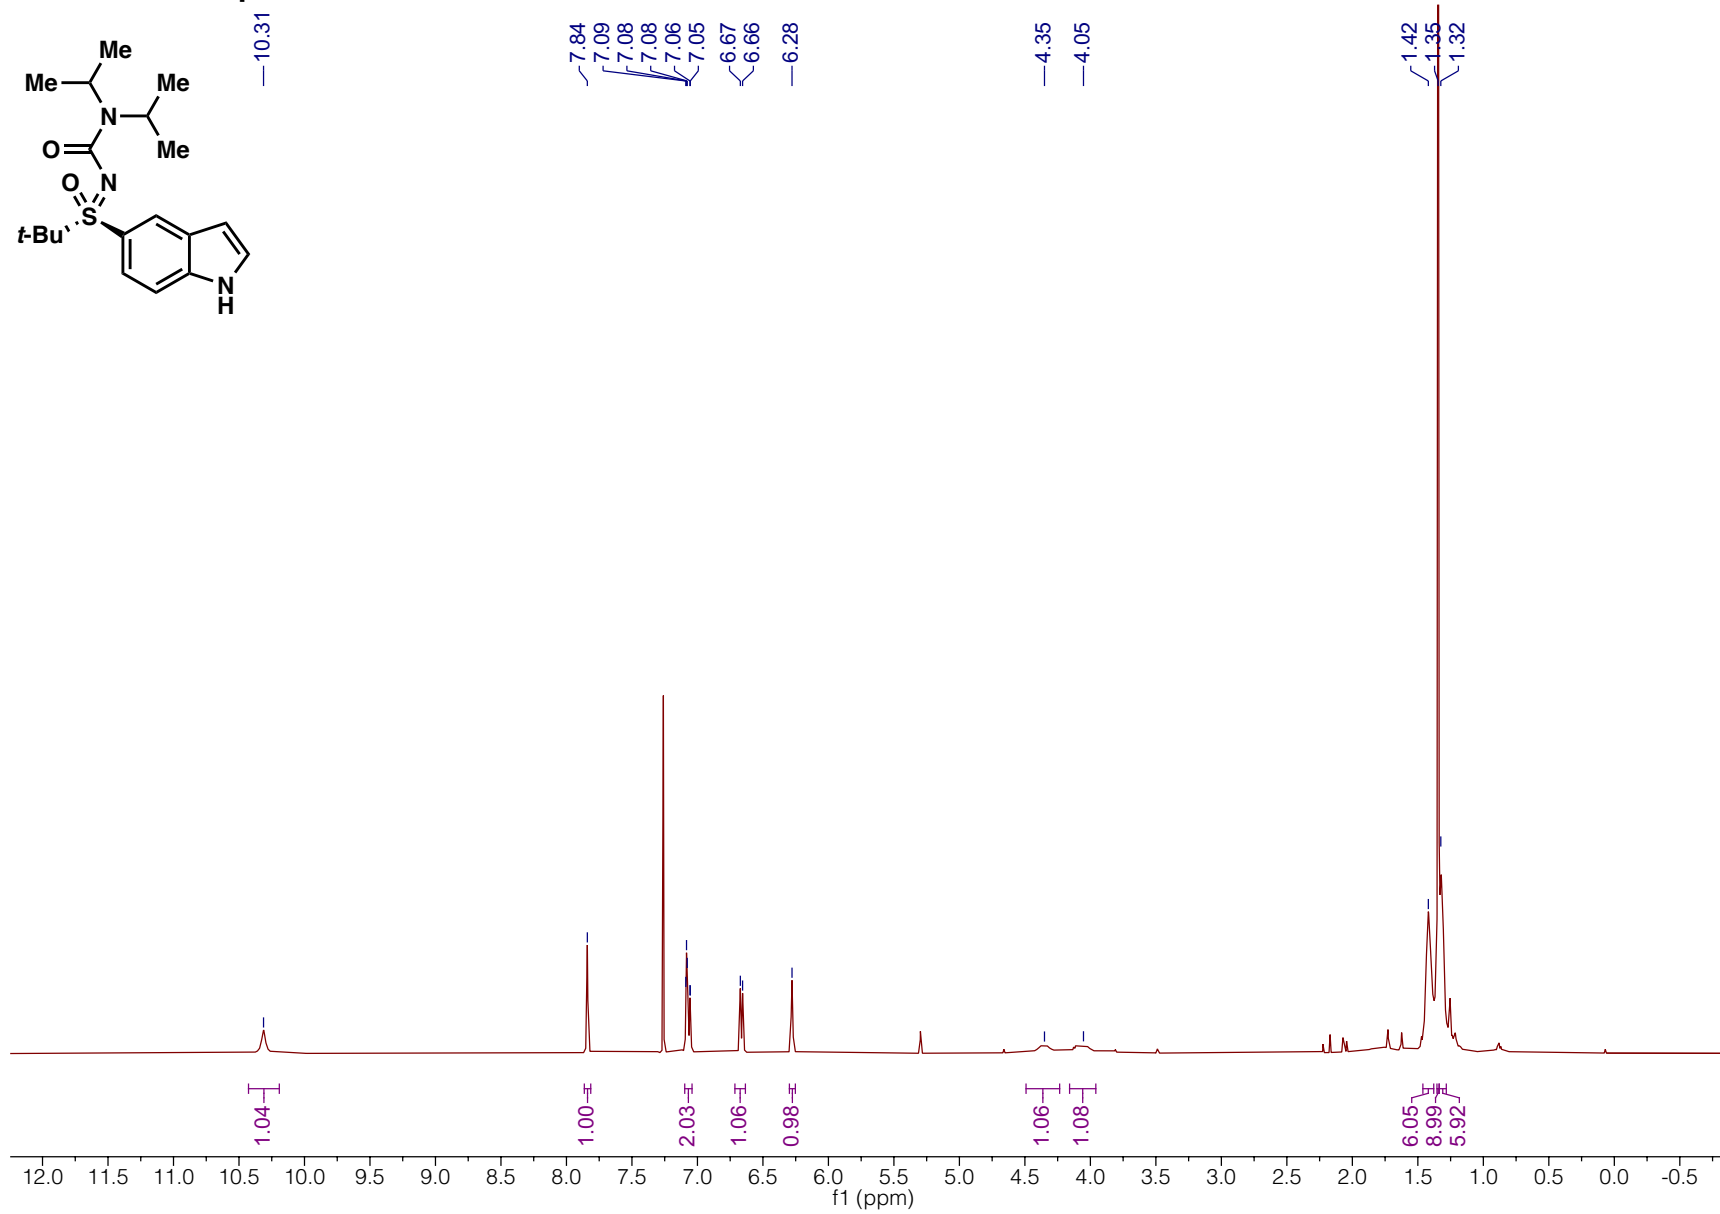

**<sup>13</sup>C NMR of compound 3a:**

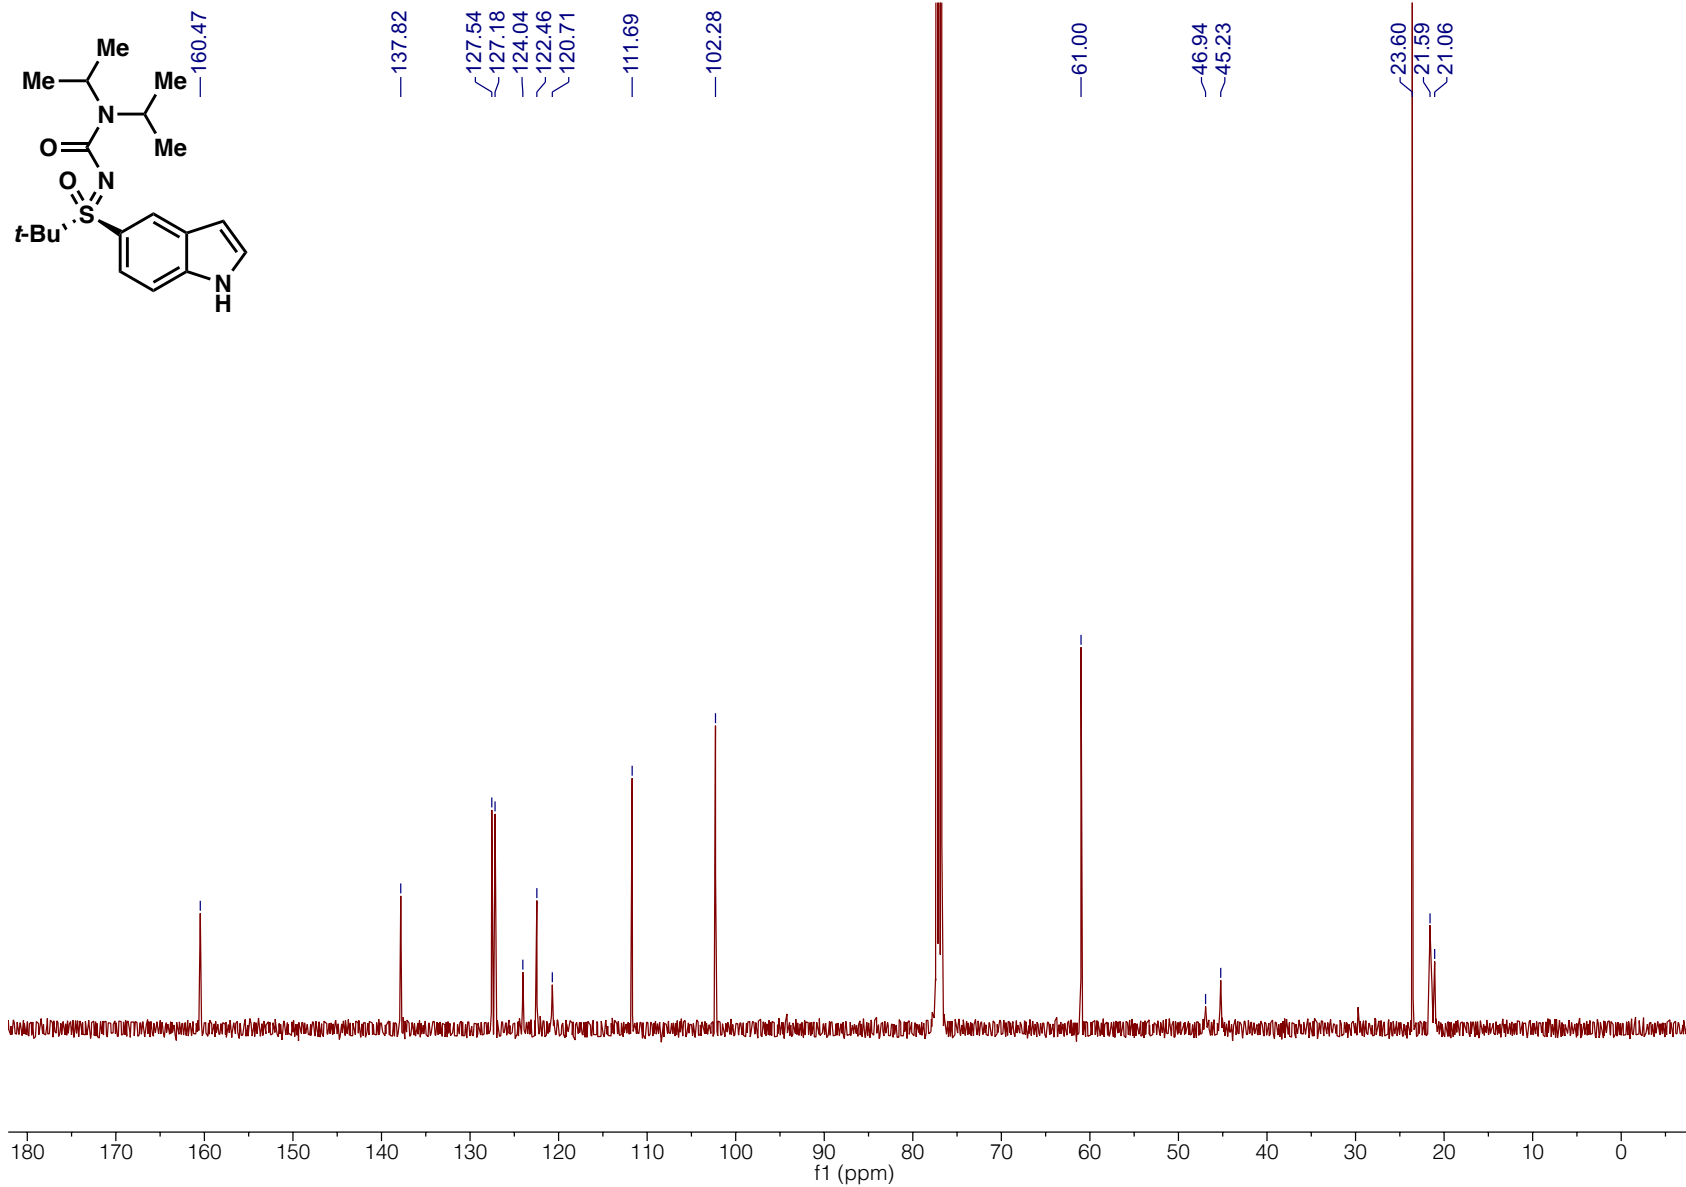

**<sup>1</sup>H NMR of compound 3b:**

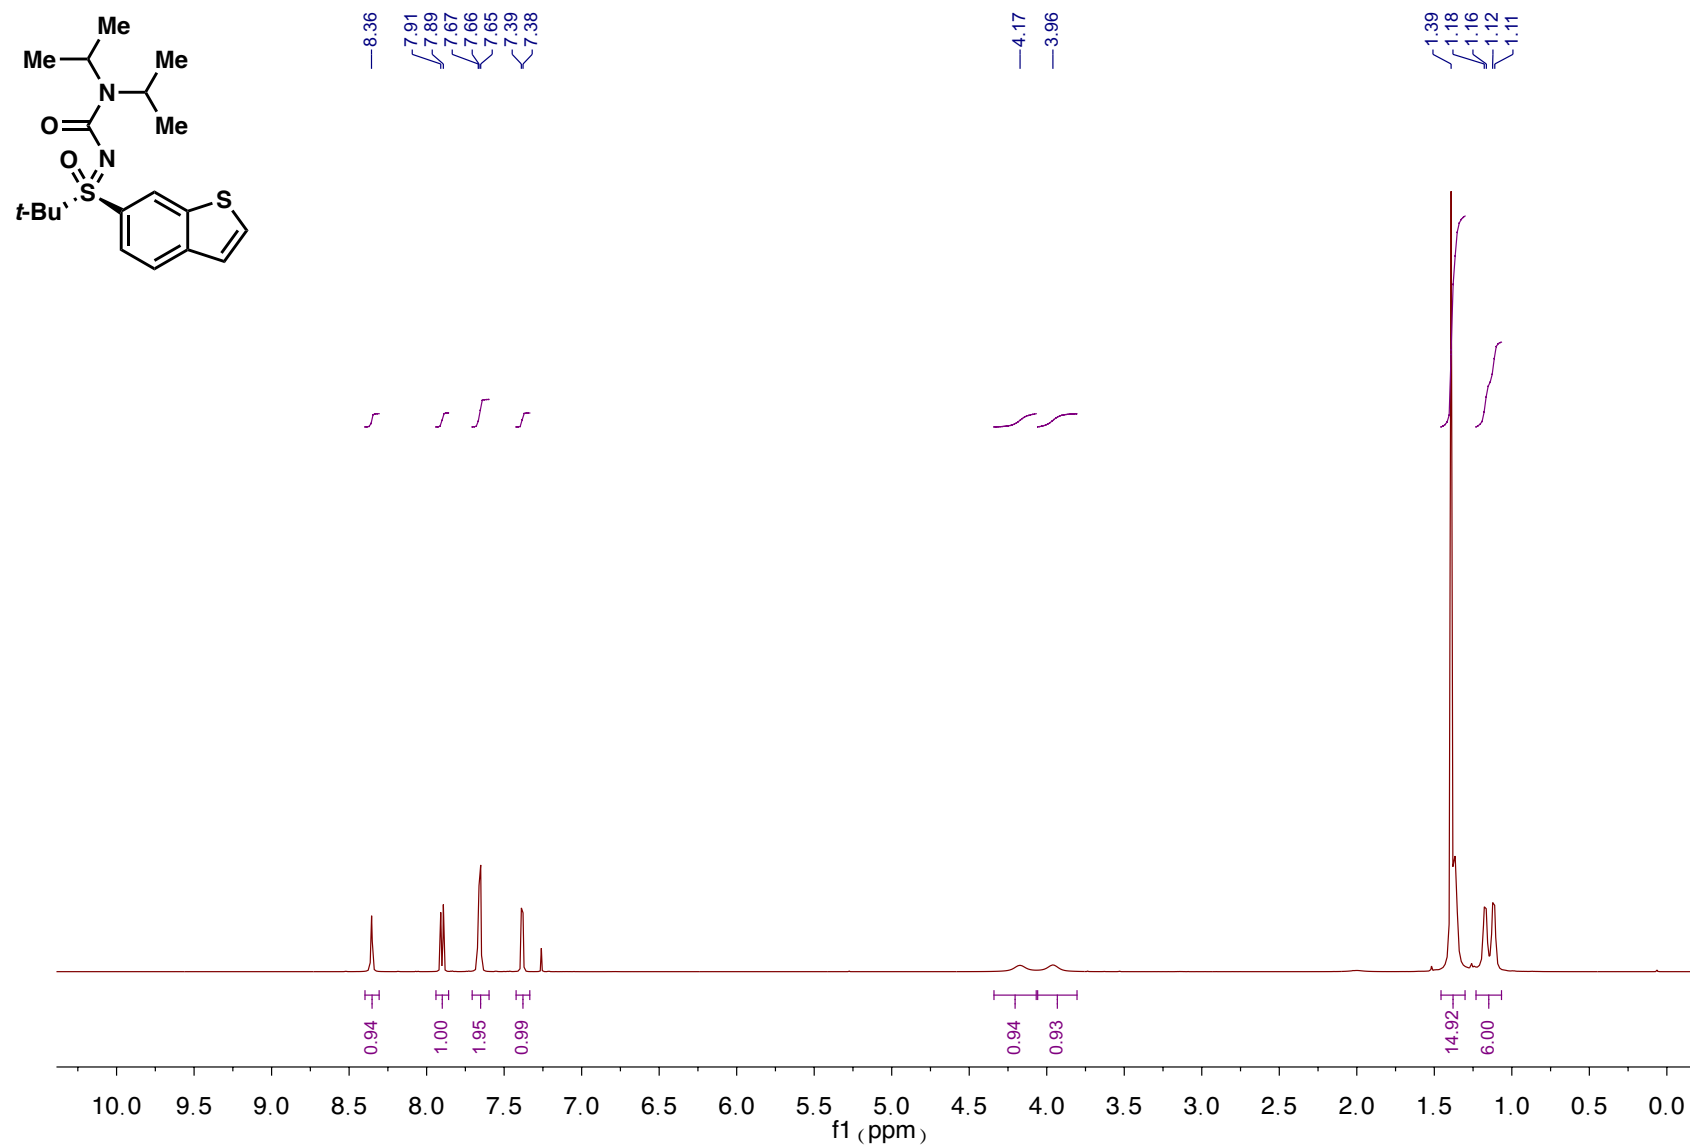

**$^{13}\text{C}$  NMR of compound 3b:**

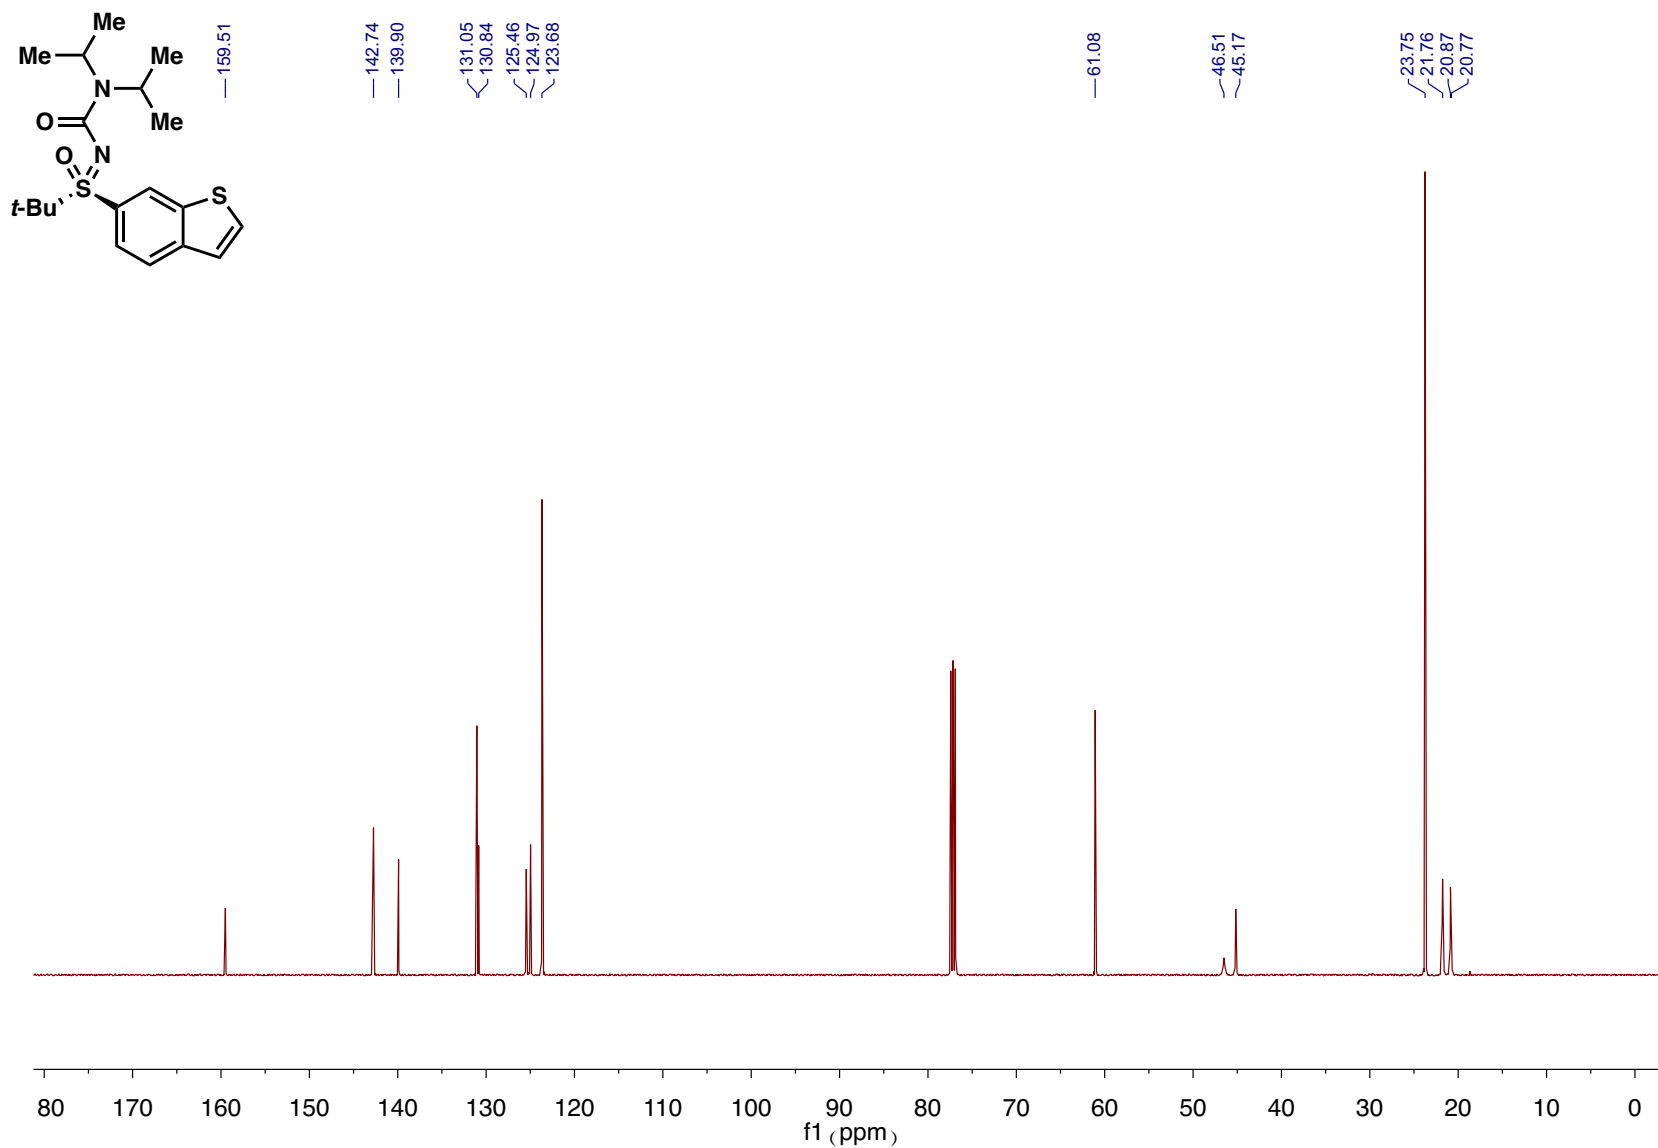

**<sup>1</sup>H NMR of compound 3c:**

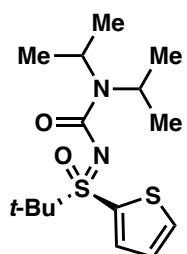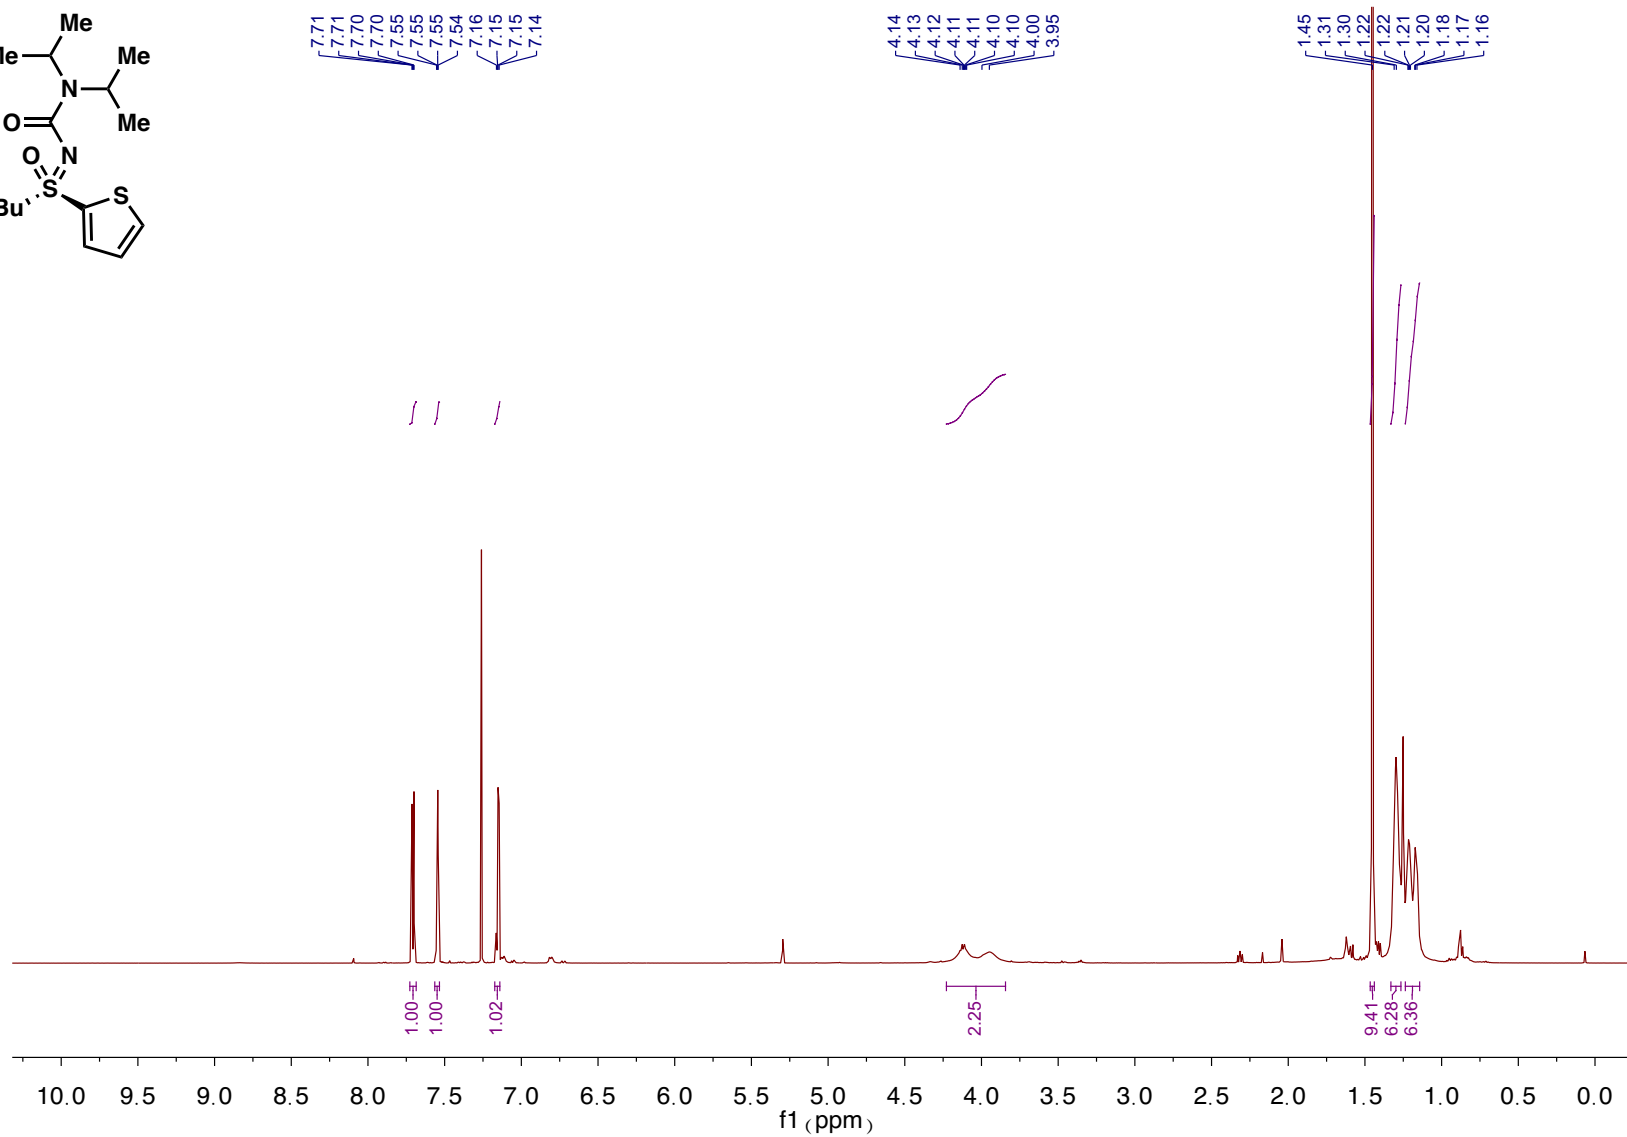

**$^{13}\text{C}$  NMR of compound 3c:**

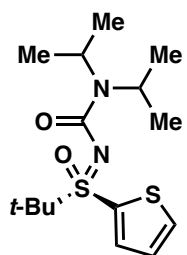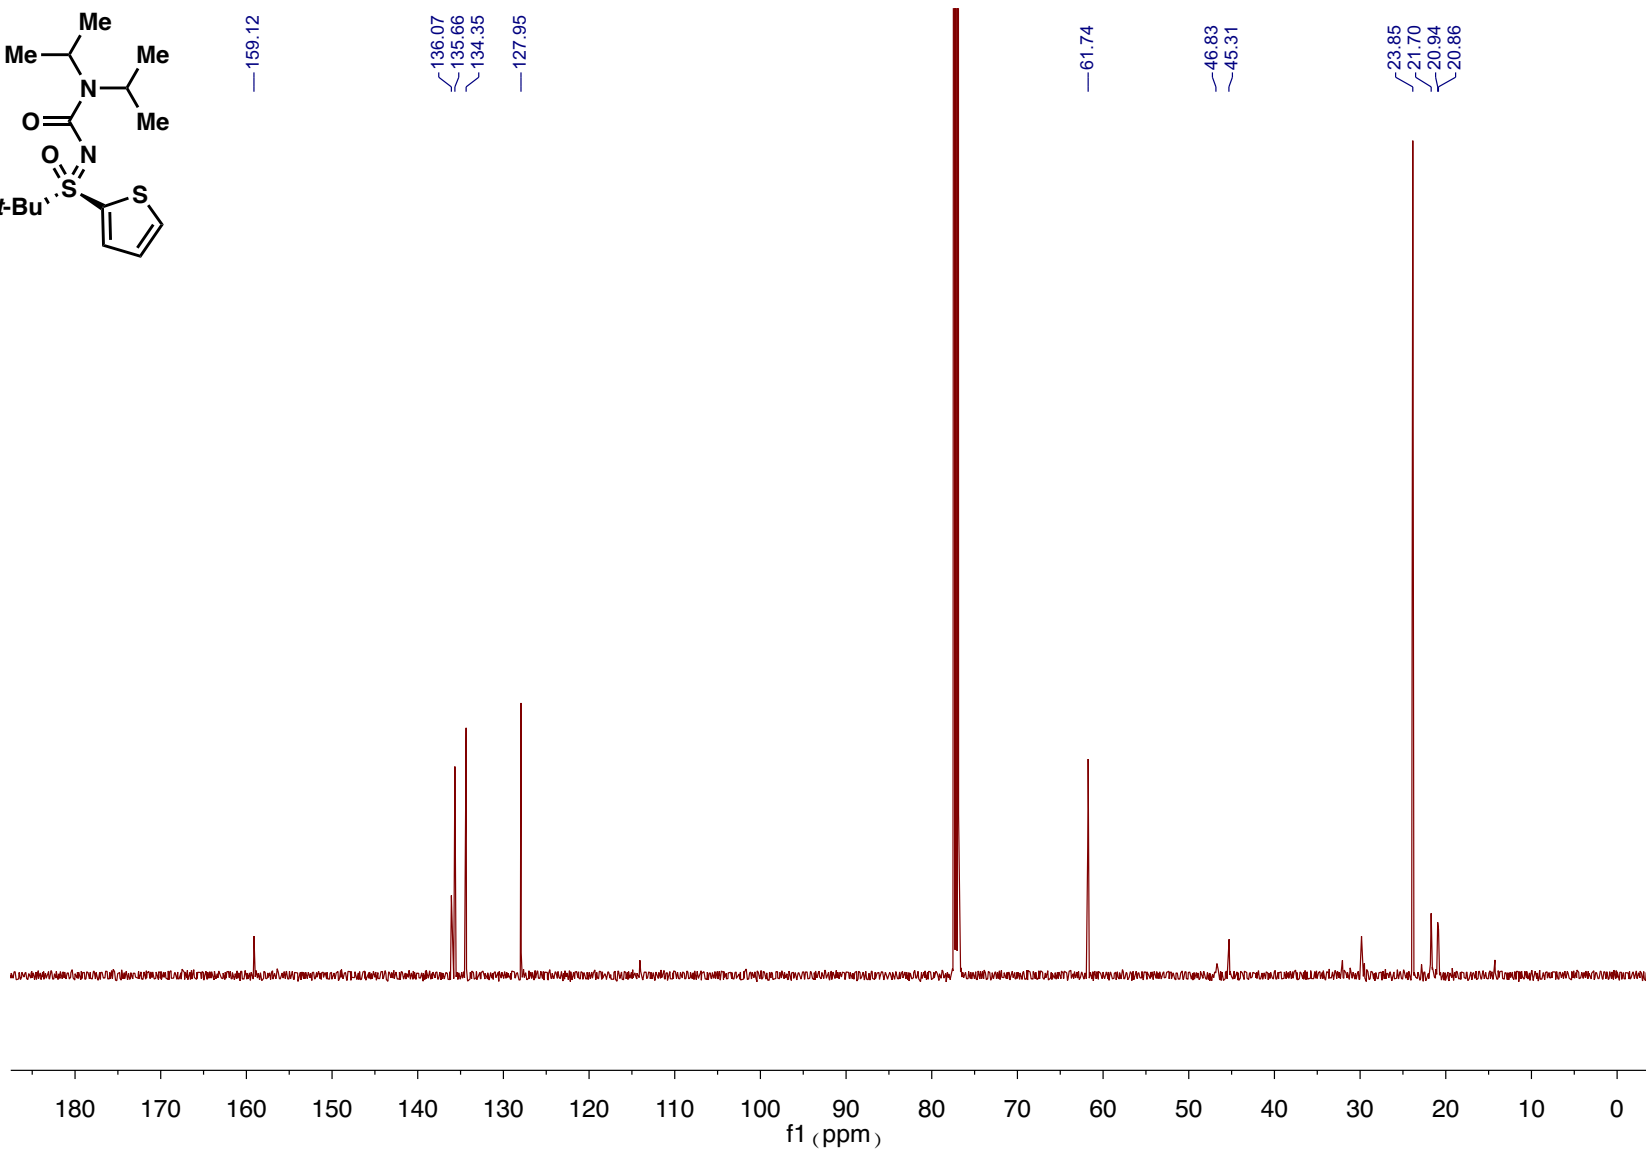

**<sup>1</sup>H NMR of compound 3d:**

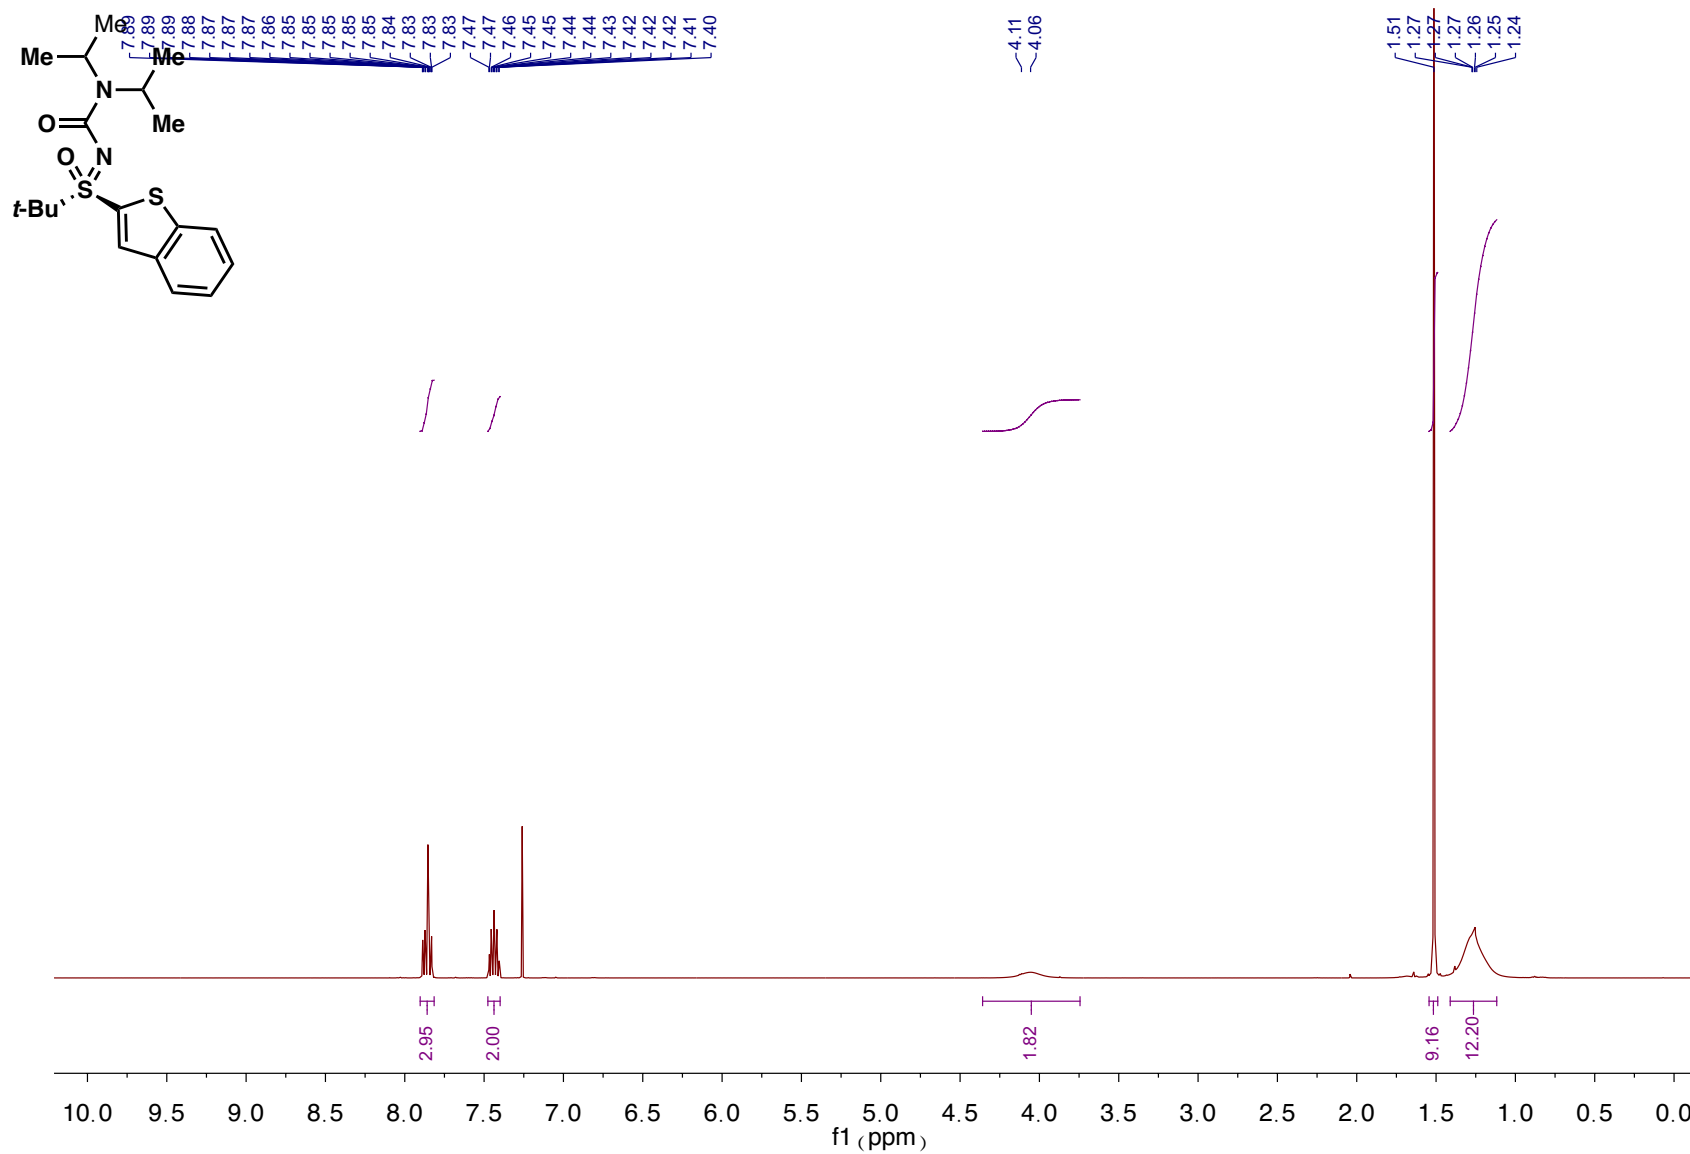

**$^{13}\text{C}$  NMR of compound 3d:**

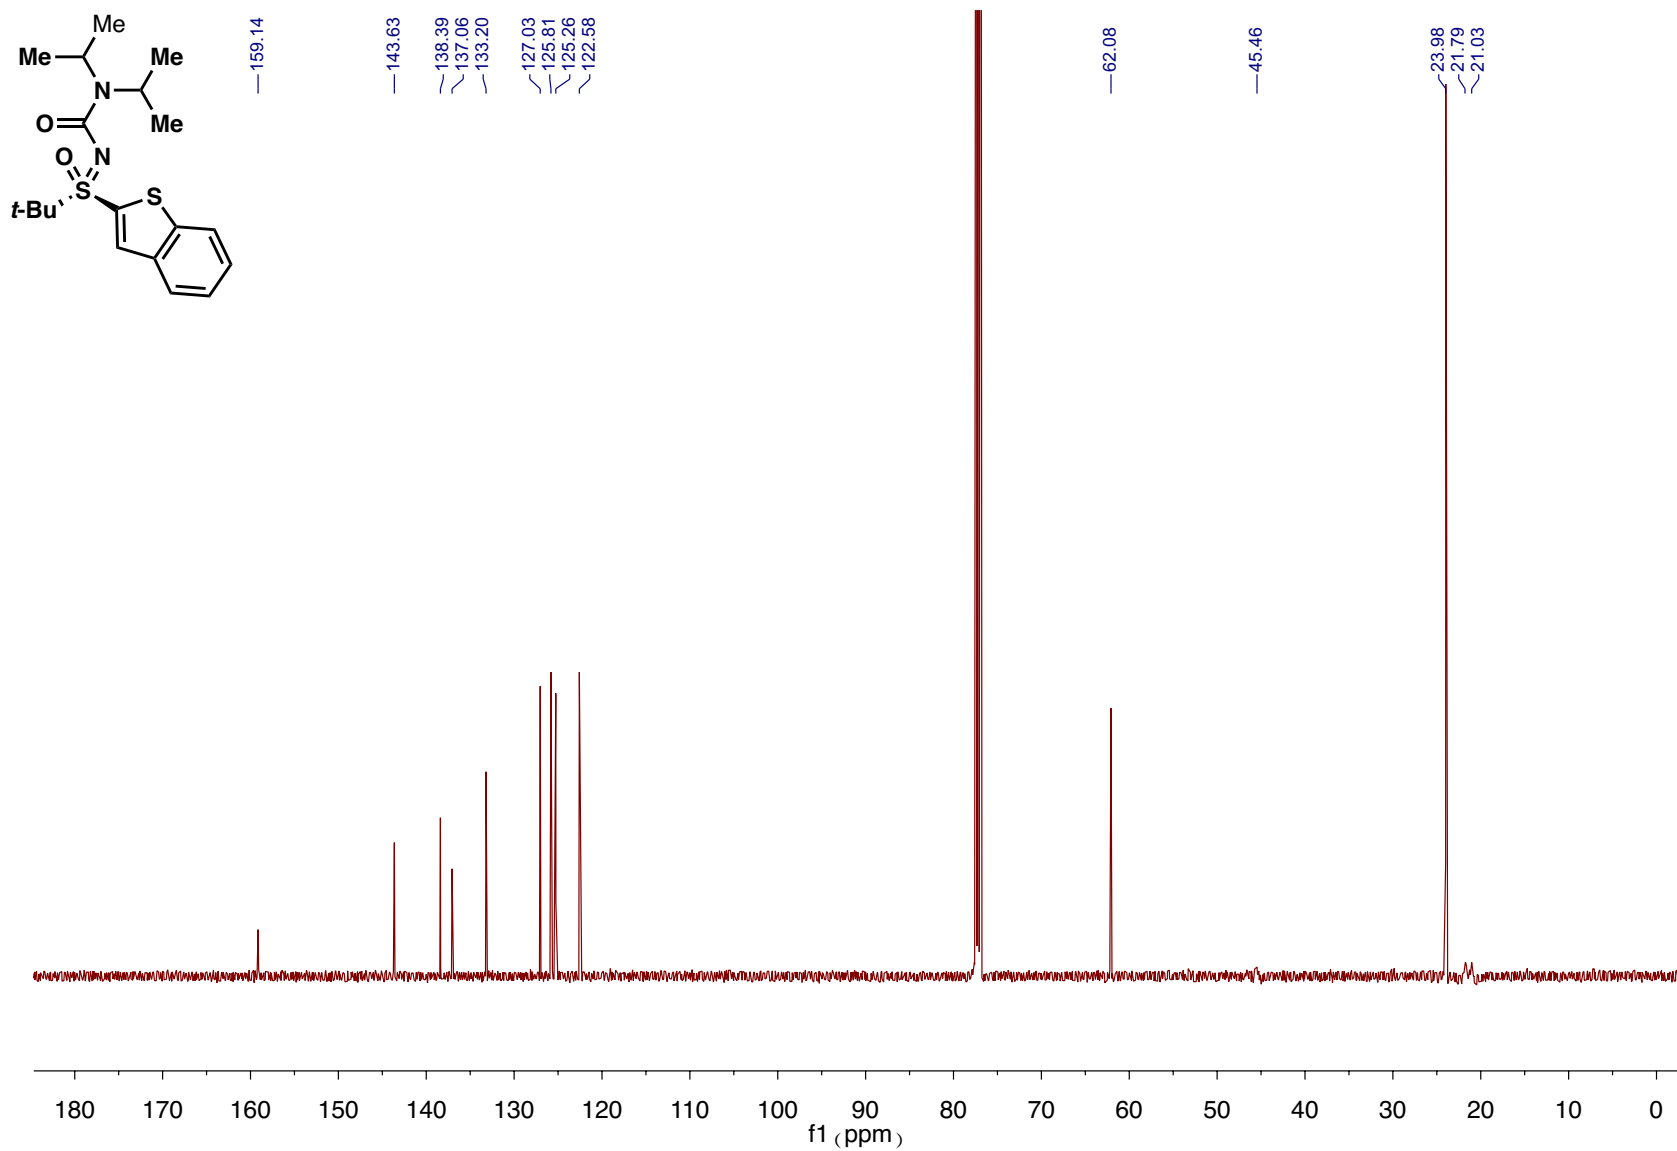

**<sup>1</sup>H NMR of compound 3e:**

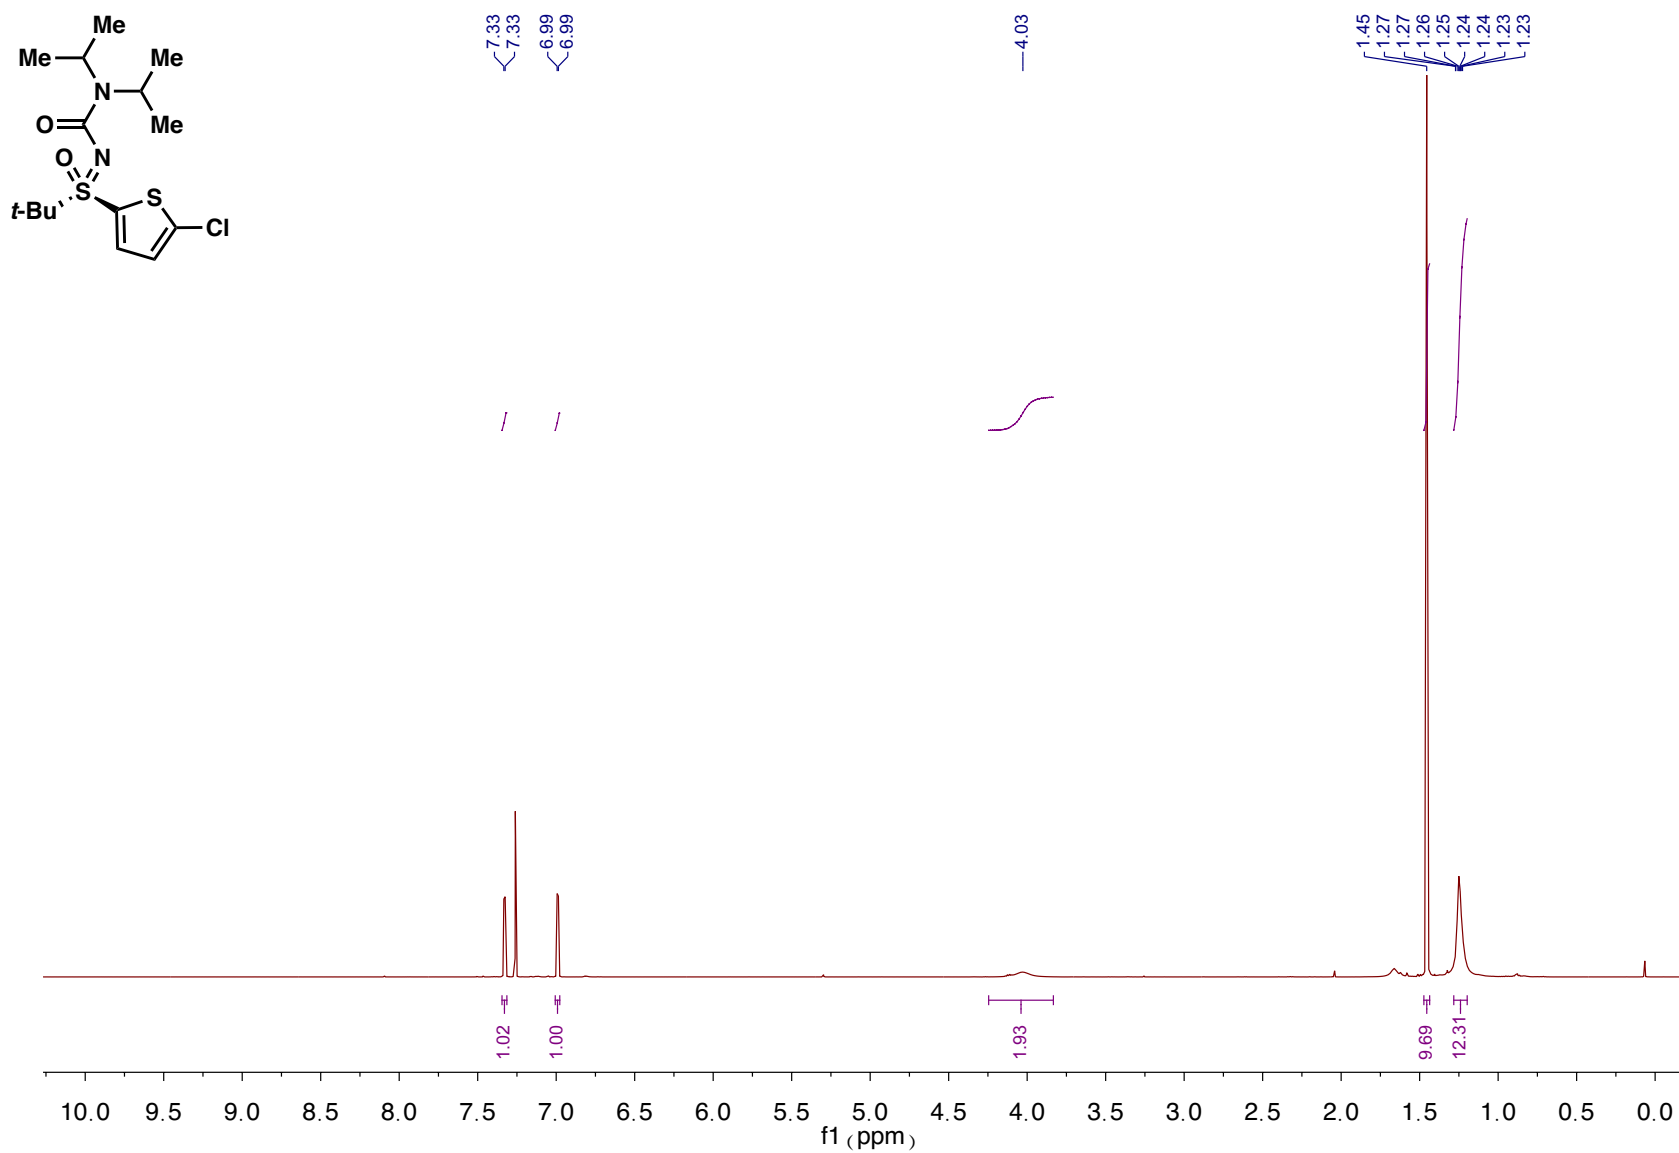

**$^{13}\text{C}$  NMR of compound 3e:**

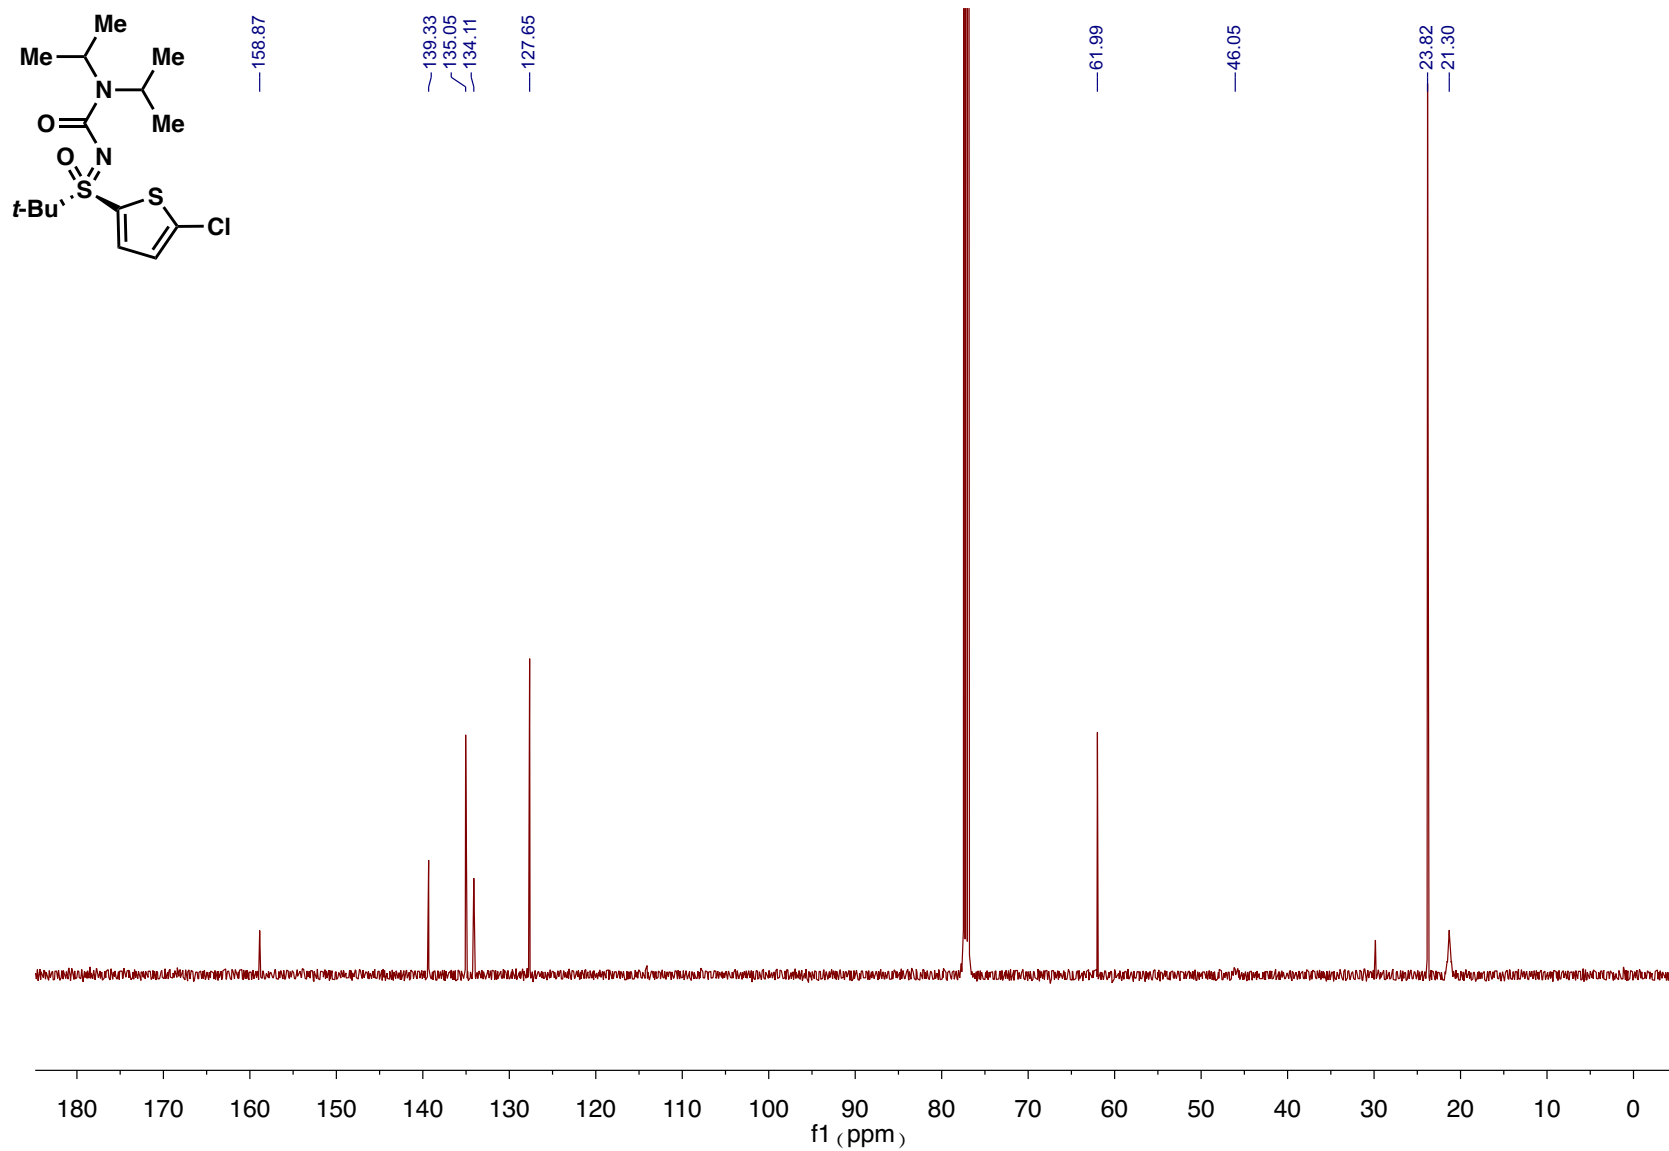

**<sup>1</sup>H NMR of compound 3f:**

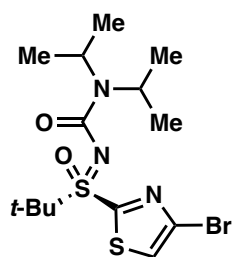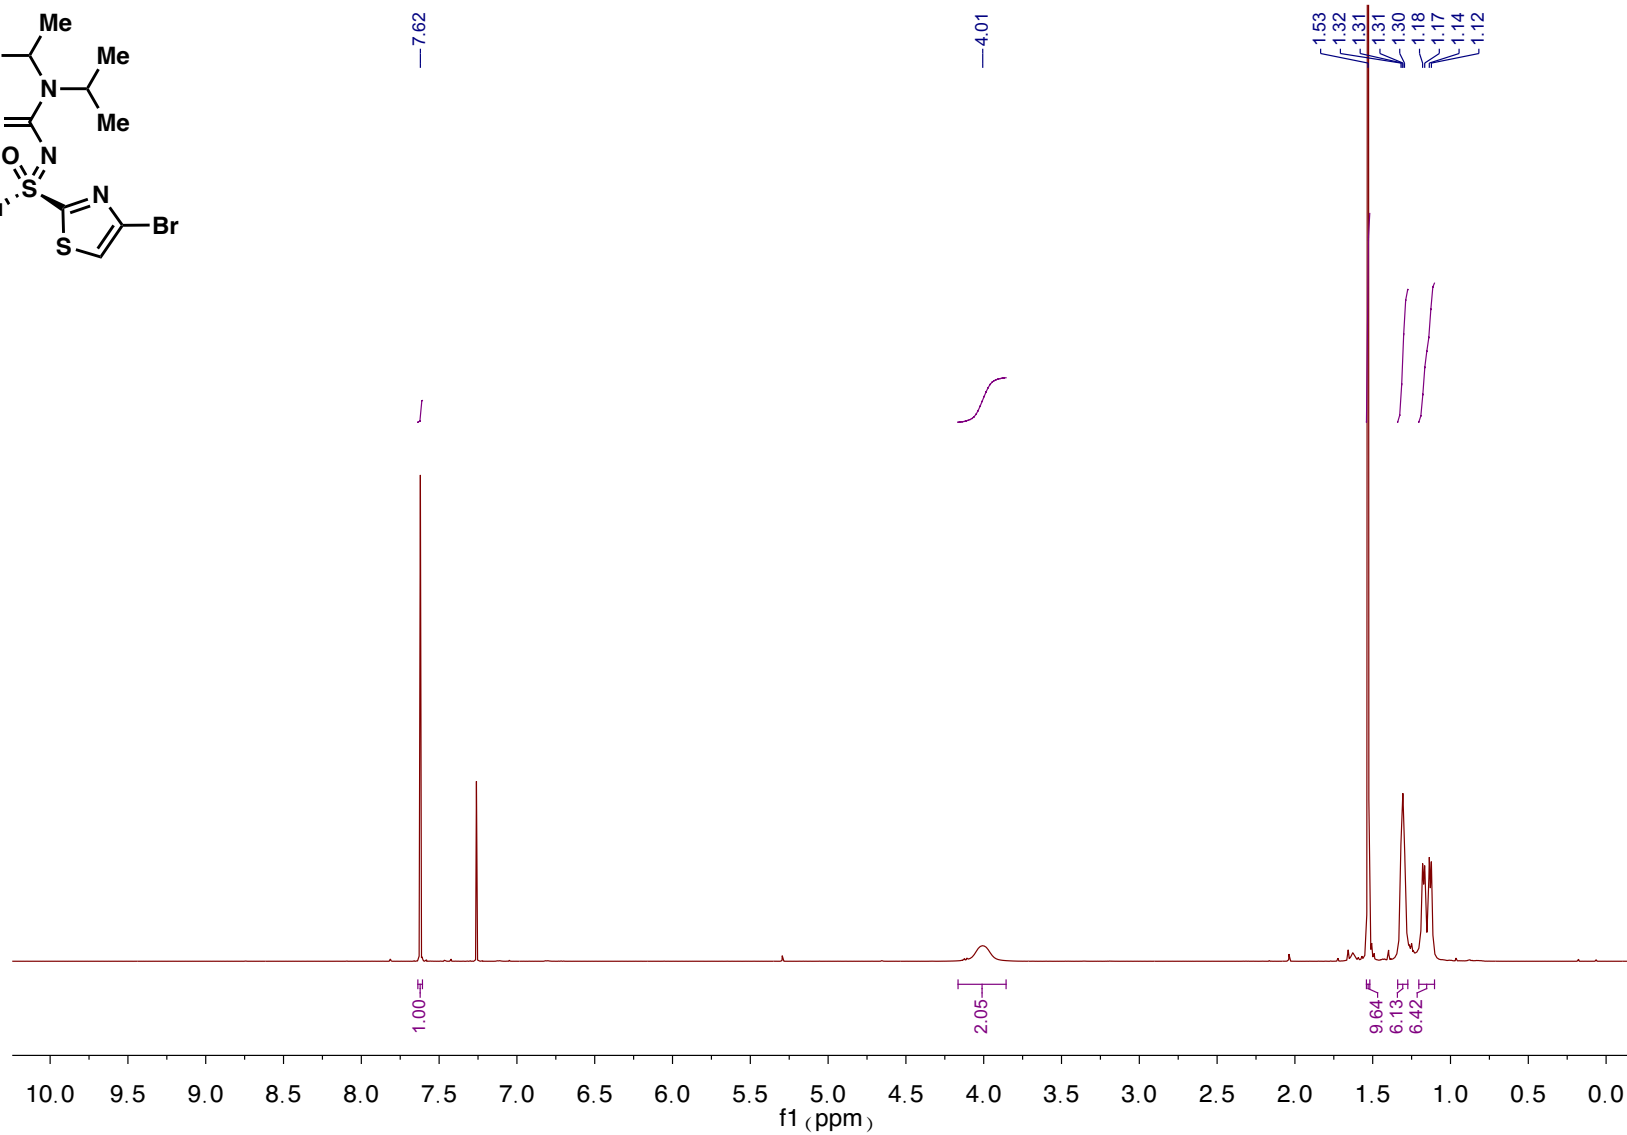

**$^{13}\text{C}$  NMR of compound 3f:**

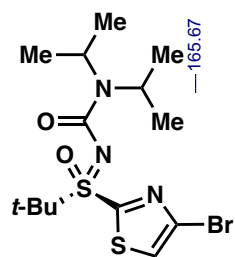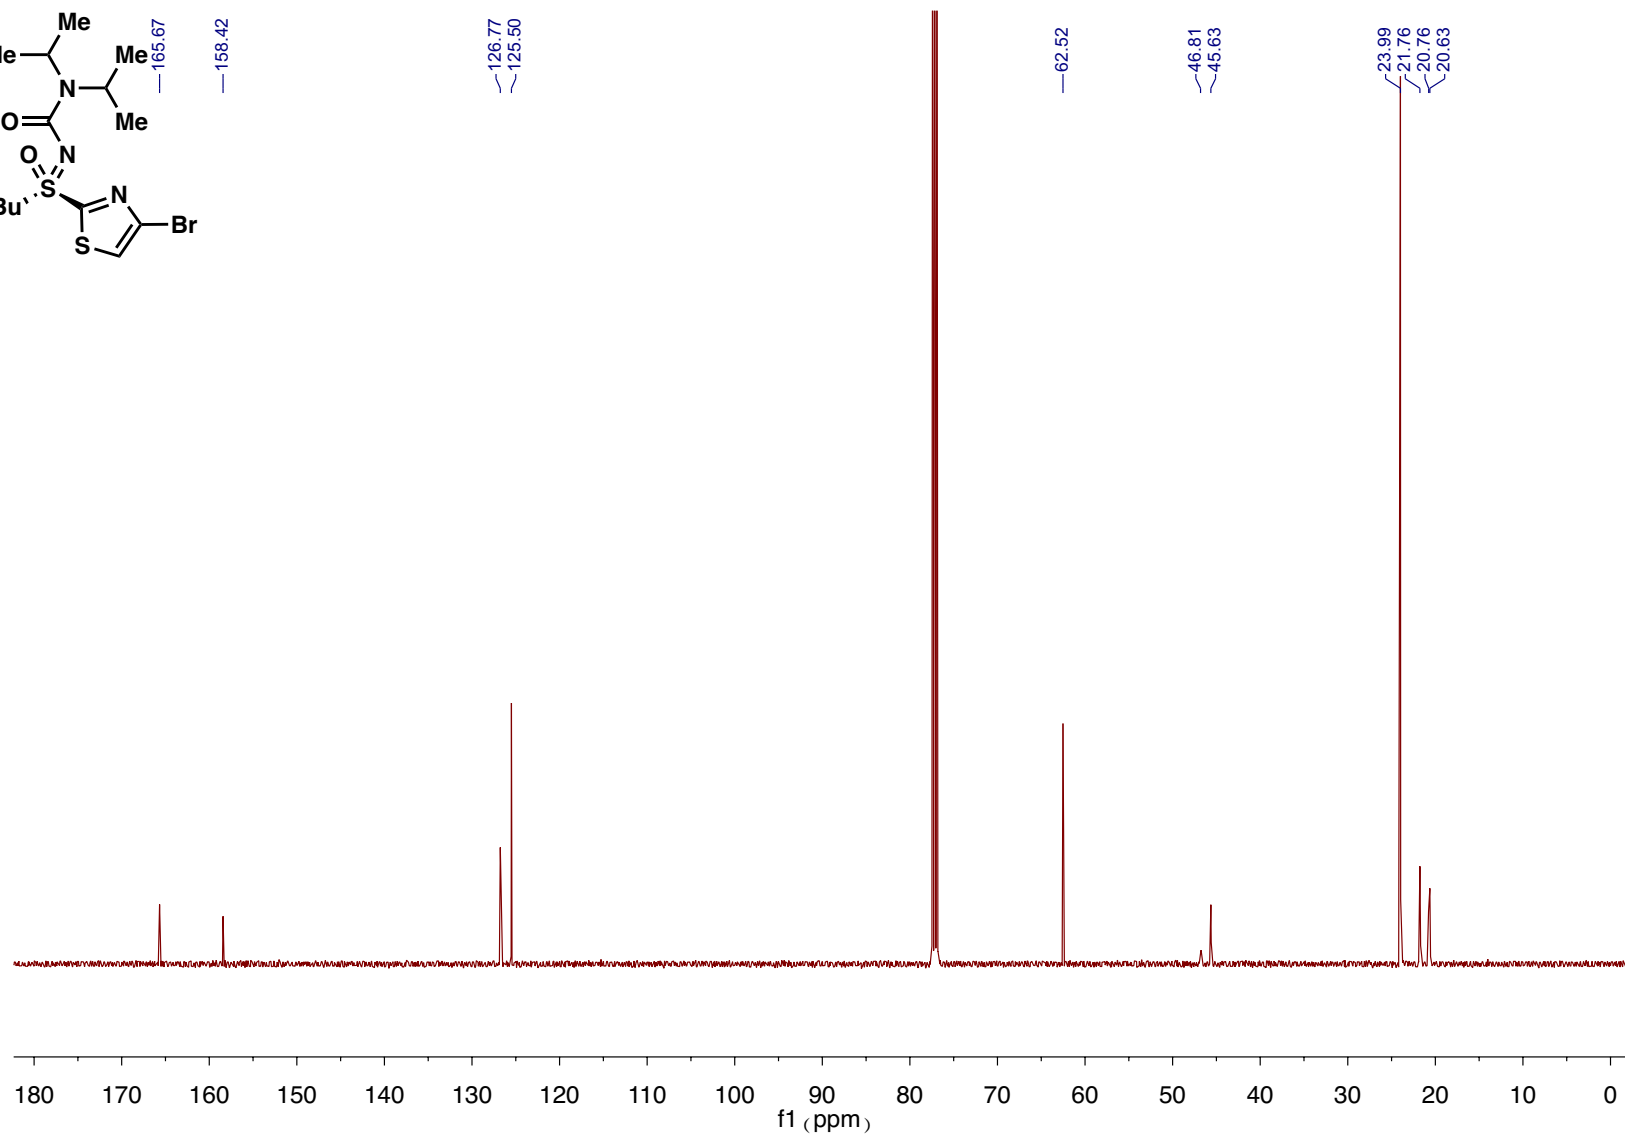

**<sup>1</sup>H NMR of compound 3g:**

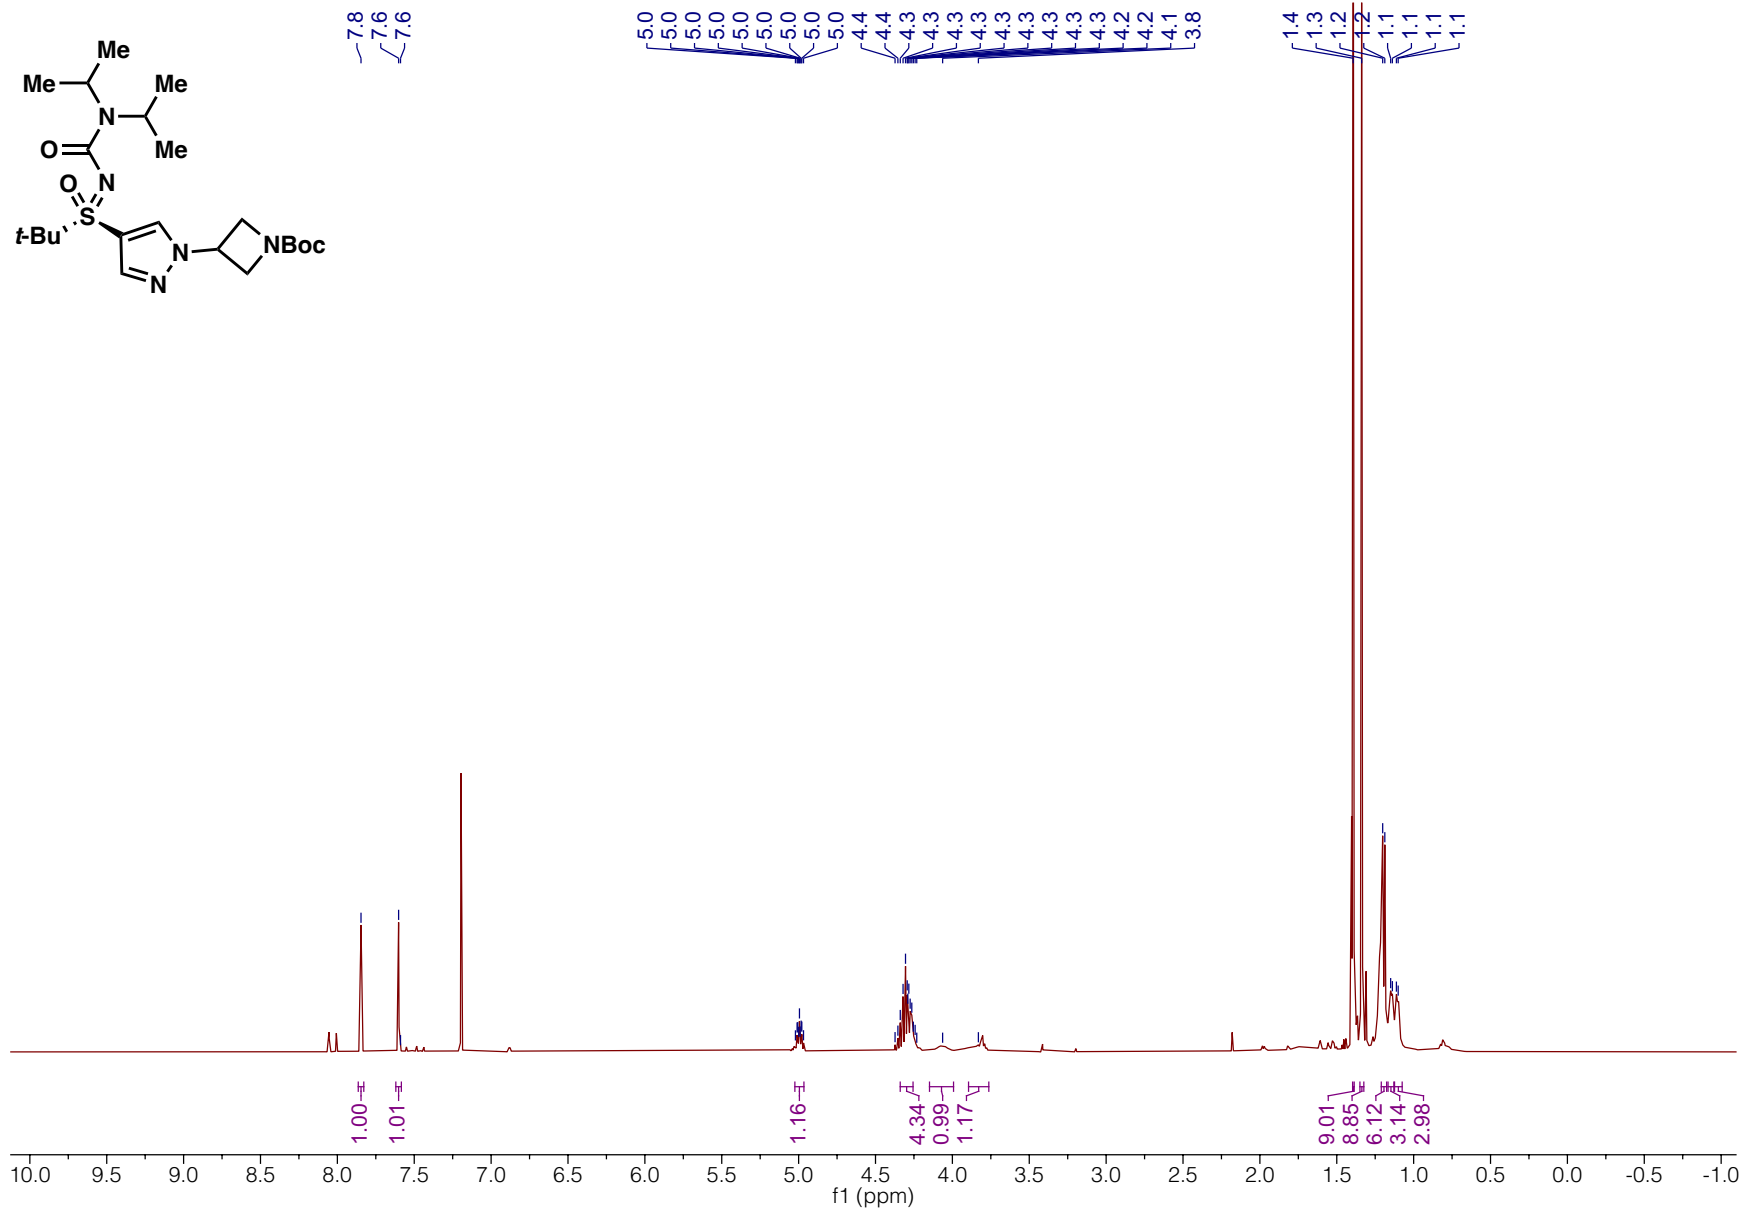

**<sup>13</sup>C NMR of compound 3g:**

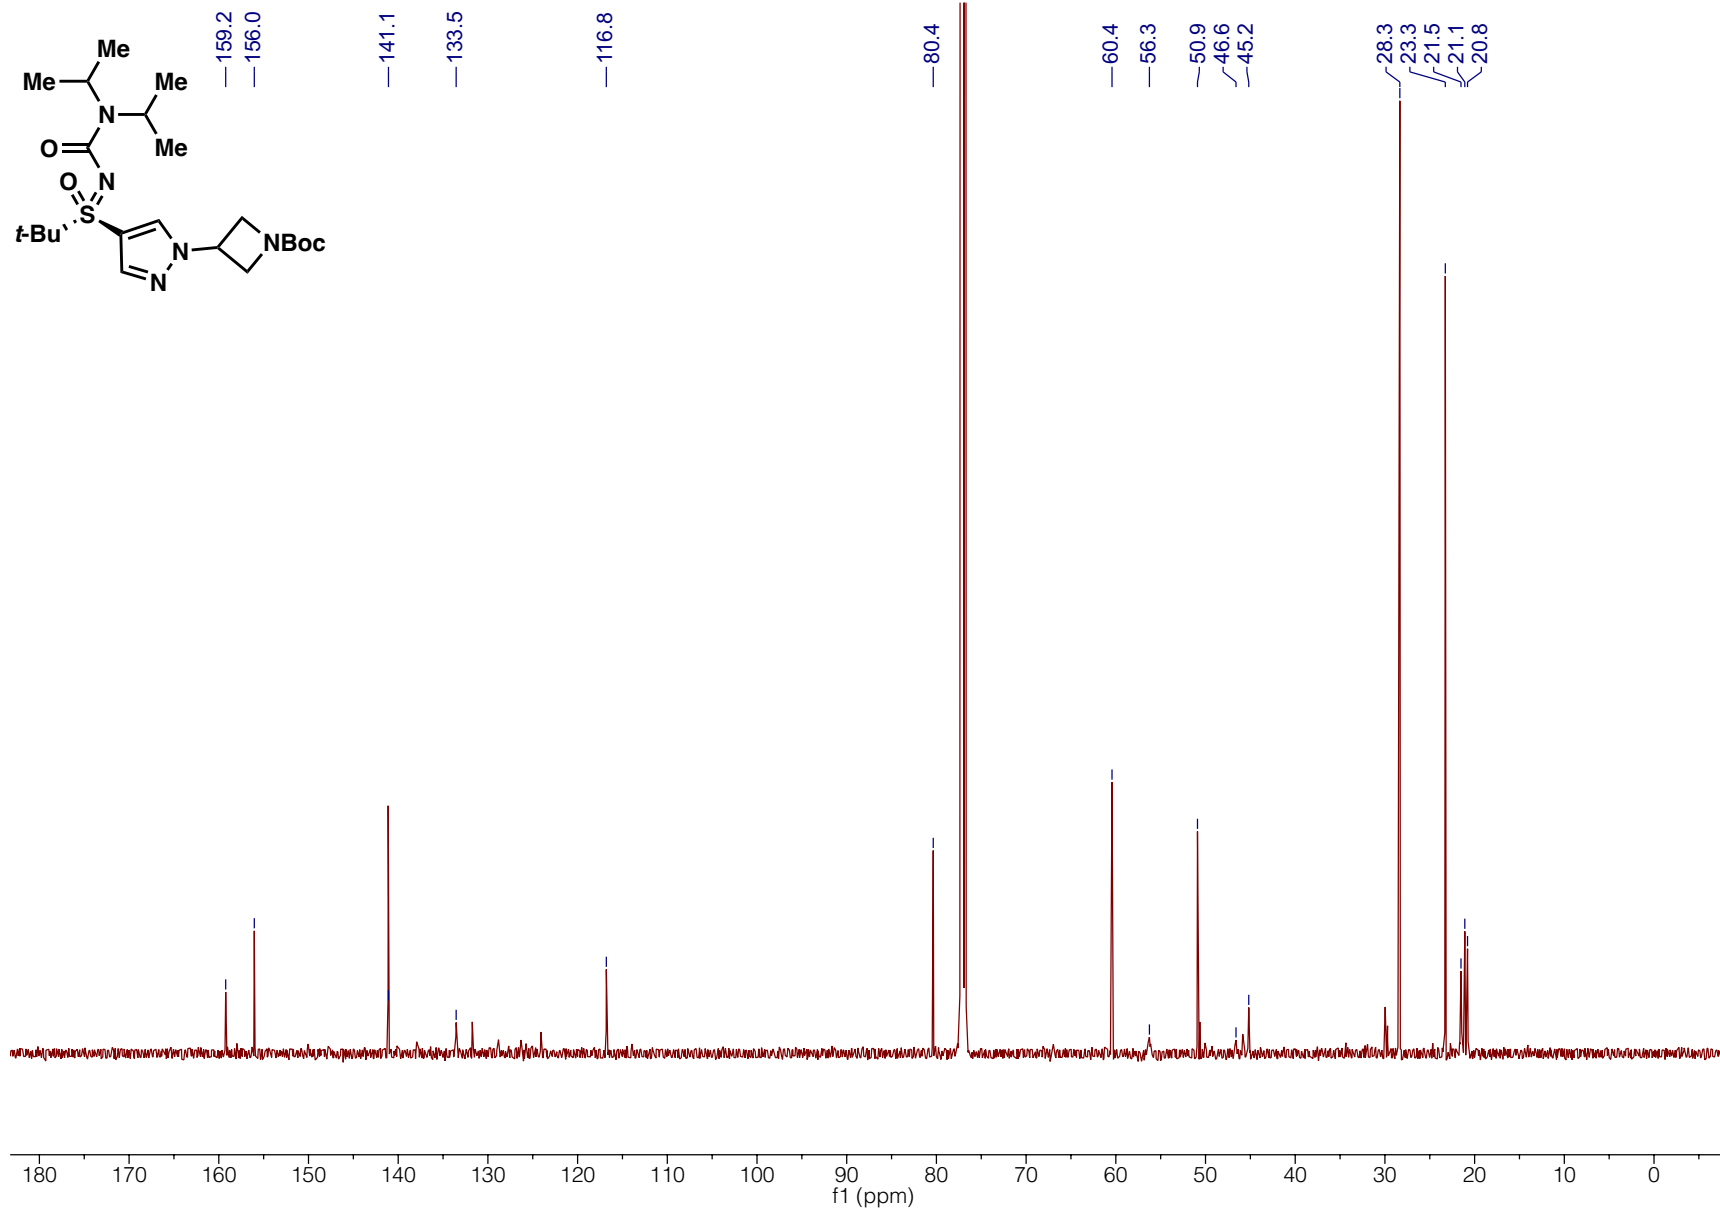

**<sup>1</sup>H NMR of compound 3h:**

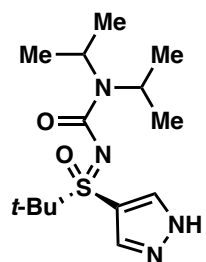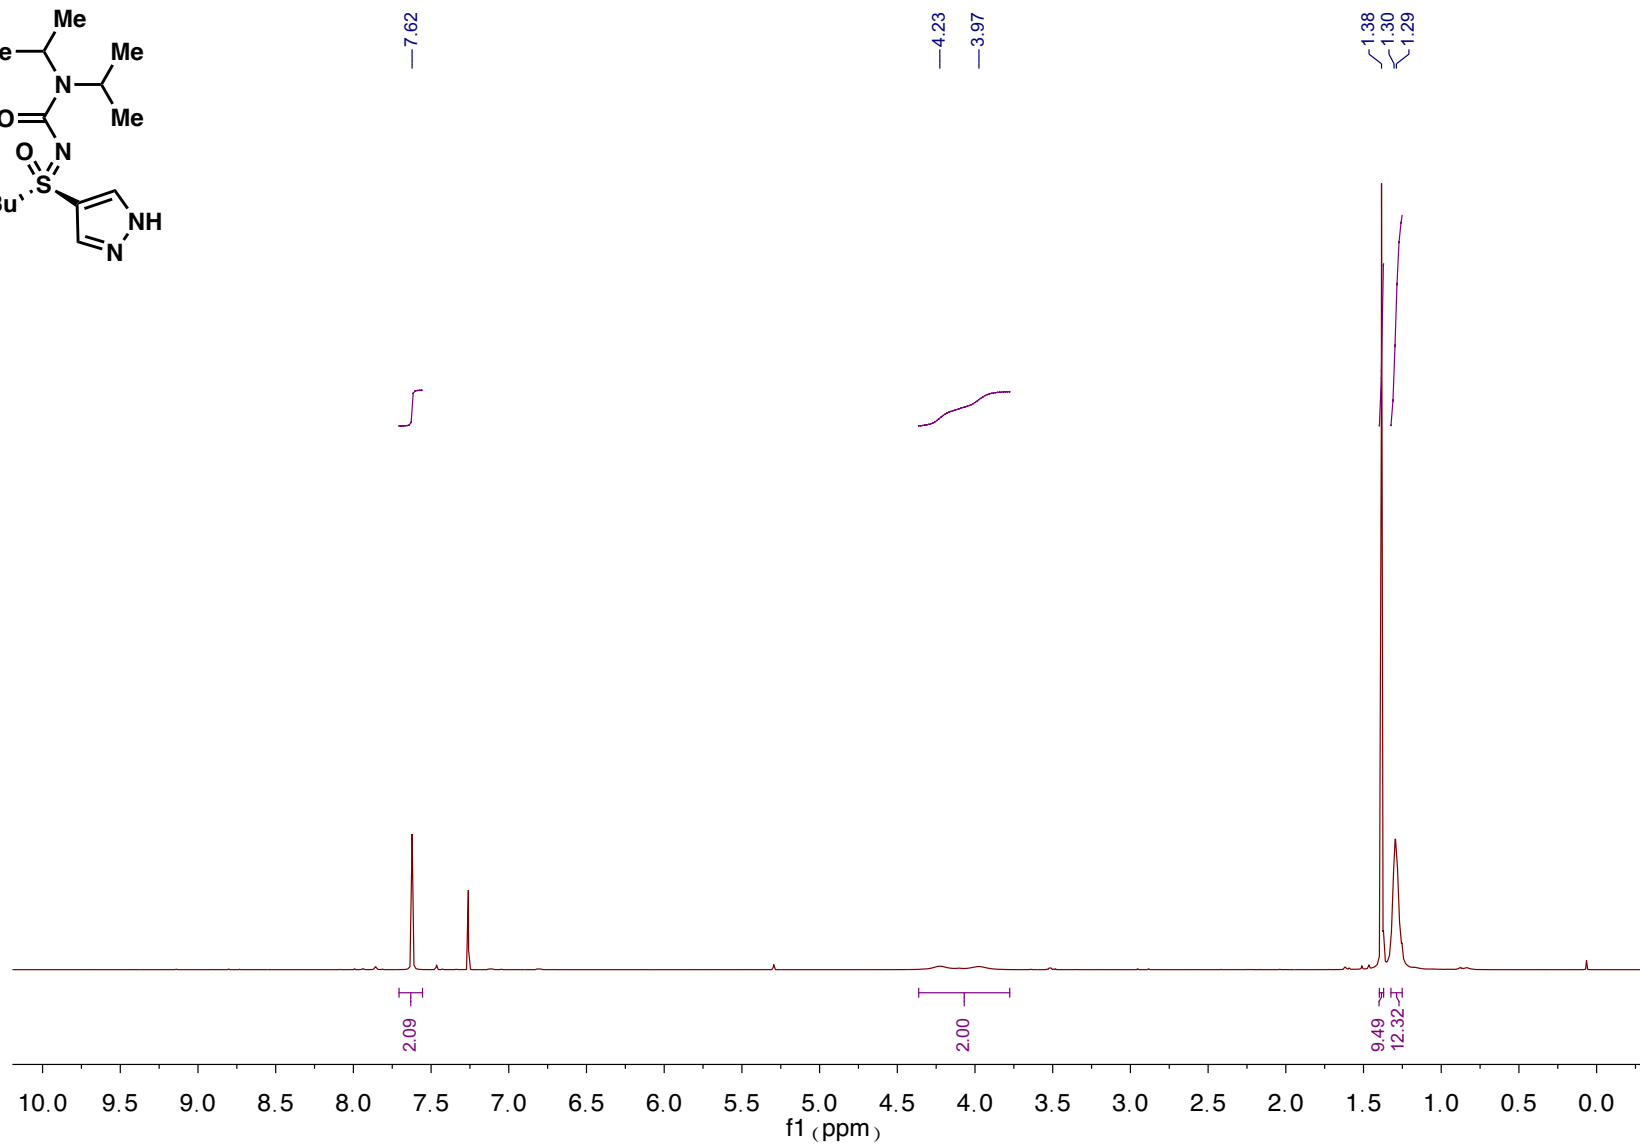

**<sup>13</sup>C NMR of compound 3h:**

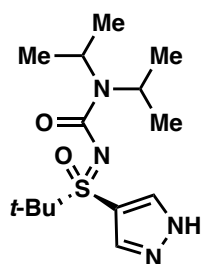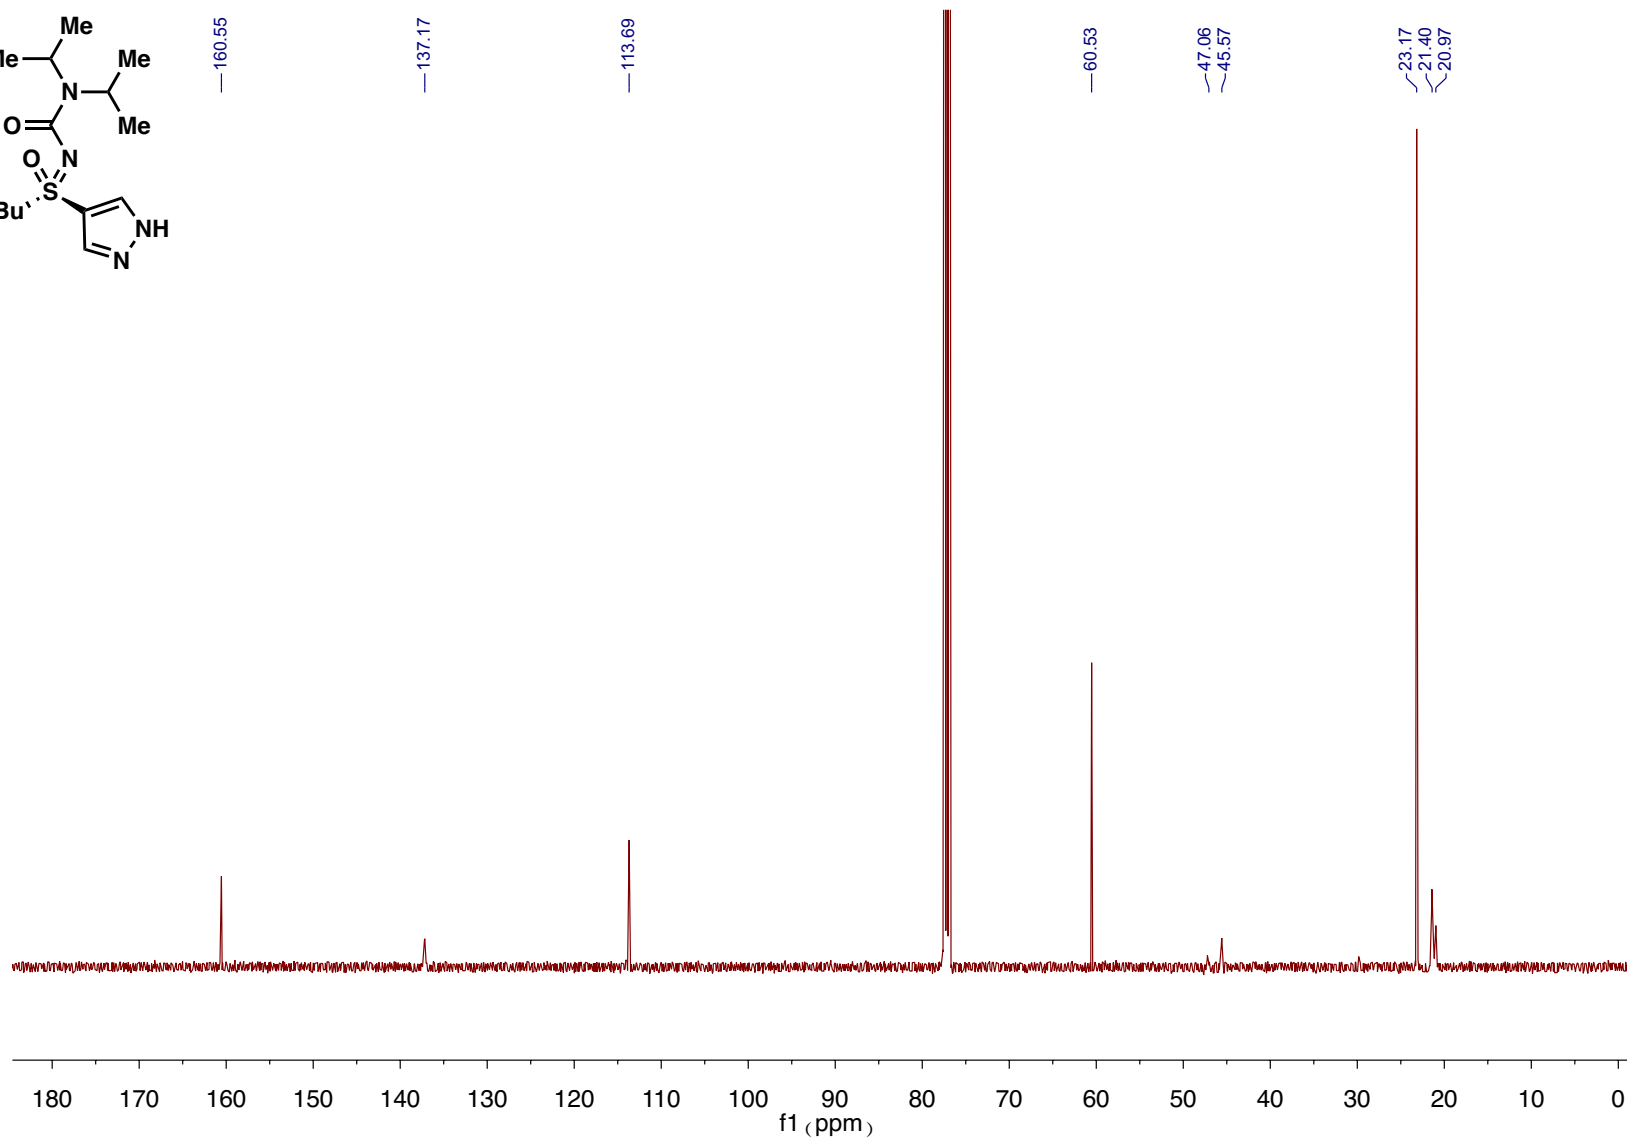

**<sup>1</sup>H NMR of compound 3i:**

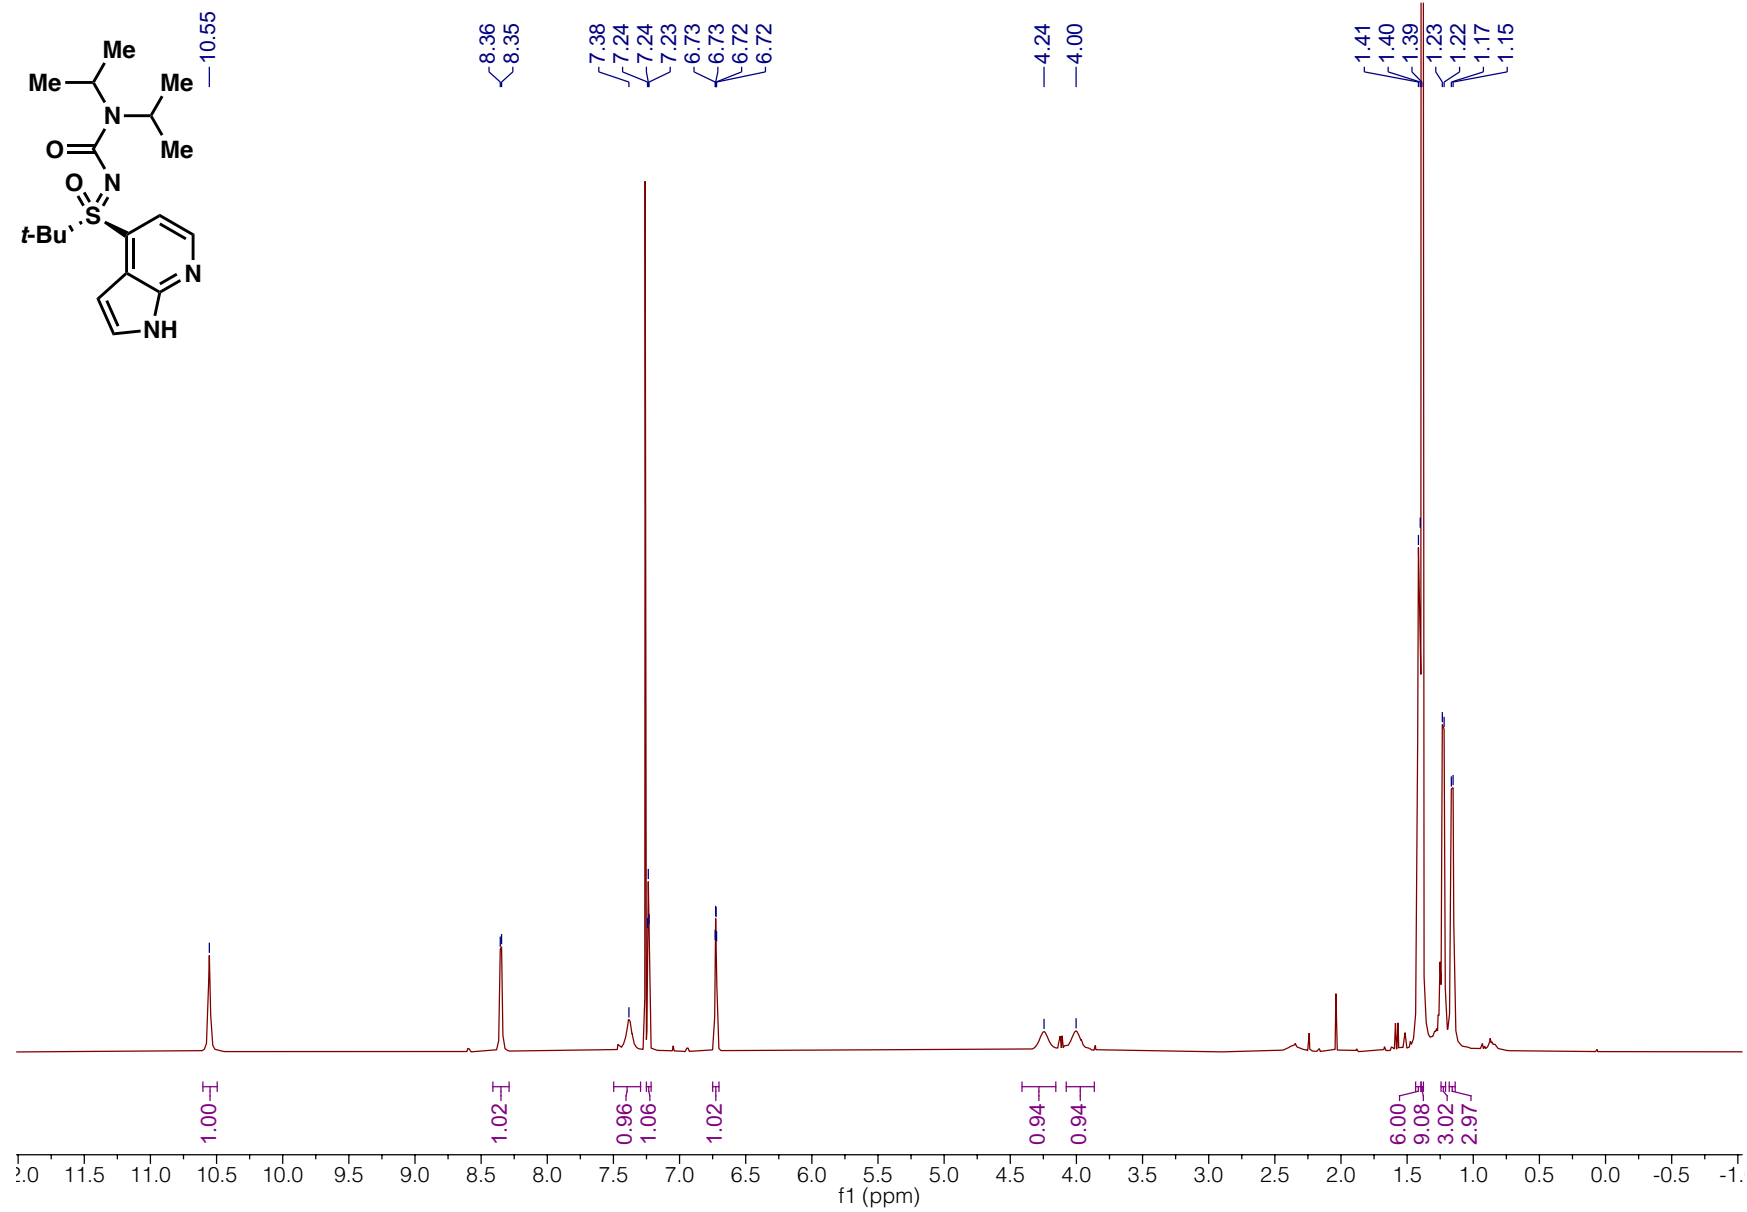

**<sup>13</sup>C NMR of compound 3i:**

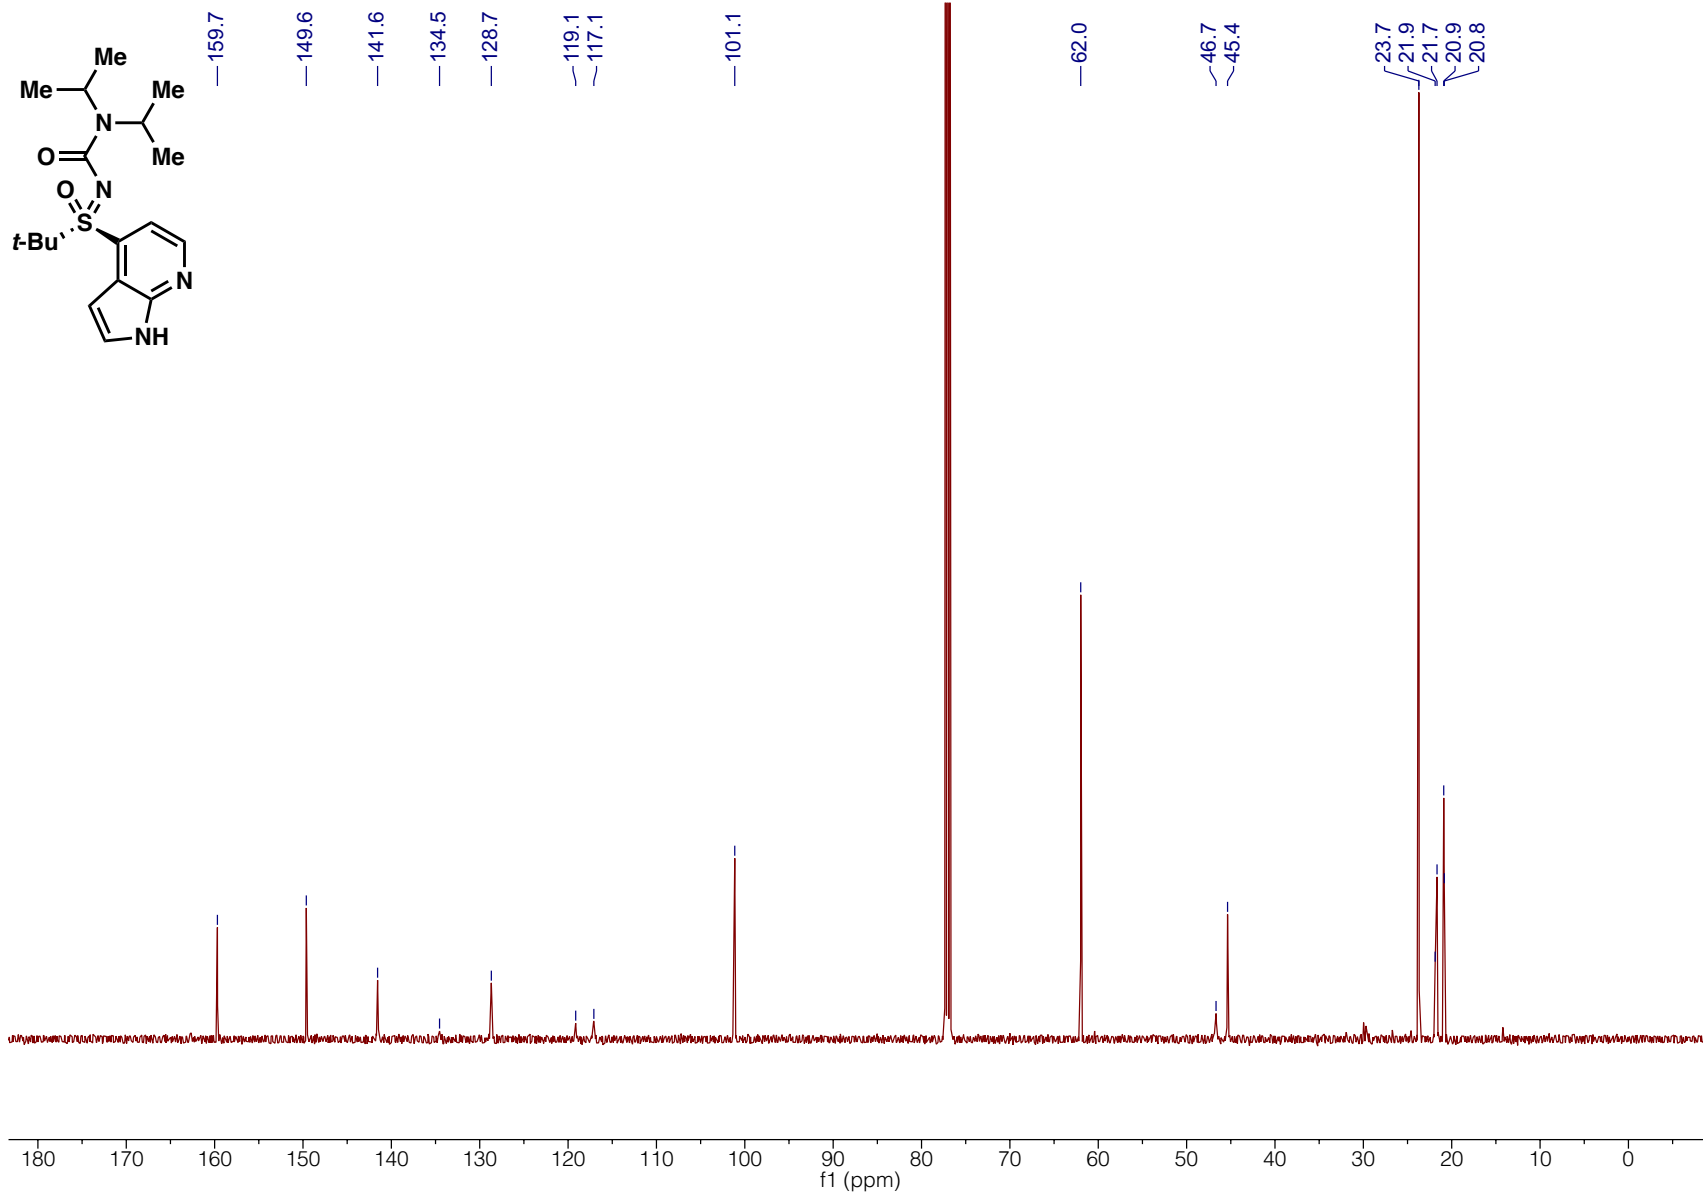

**<sup>1</sup>H NMR of compound 4a:**

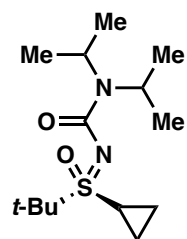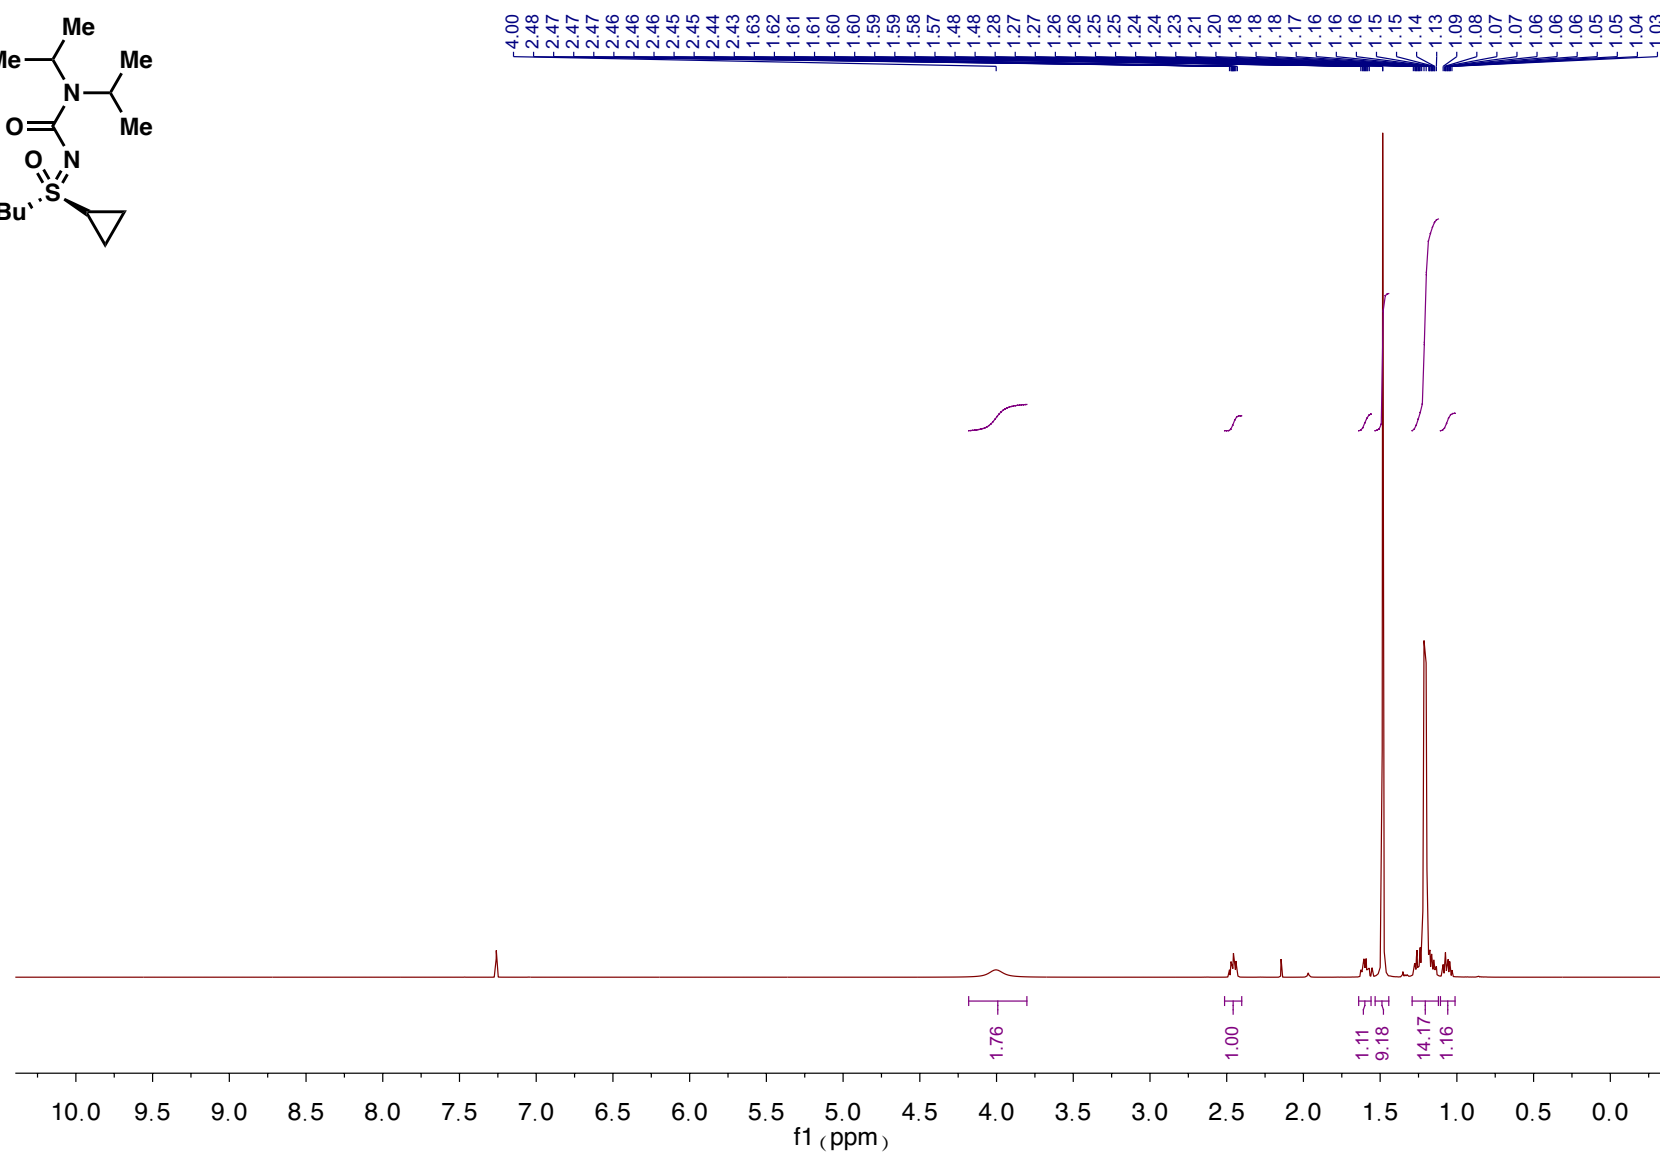

**<sup>13</sup>C NMR of compound 4a:**

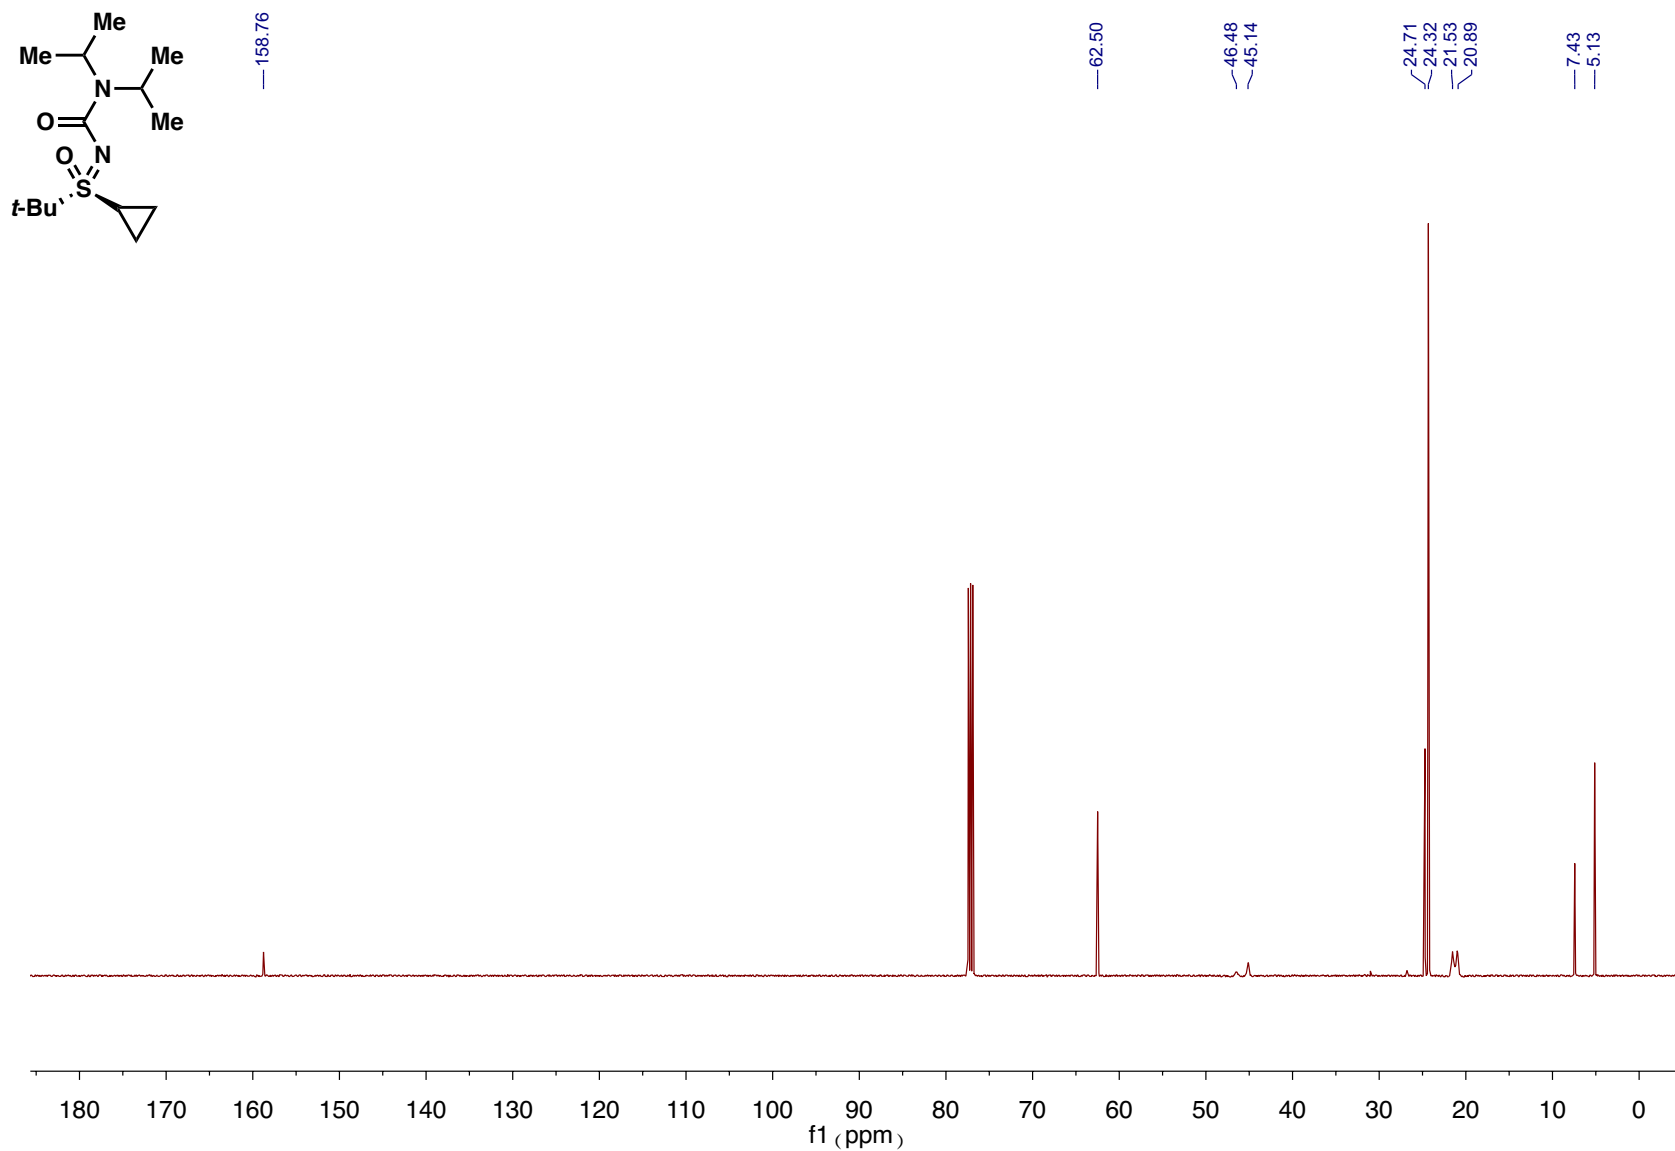

**<sup>1</sup>H NMR of phenyl sulfinyl urea:**

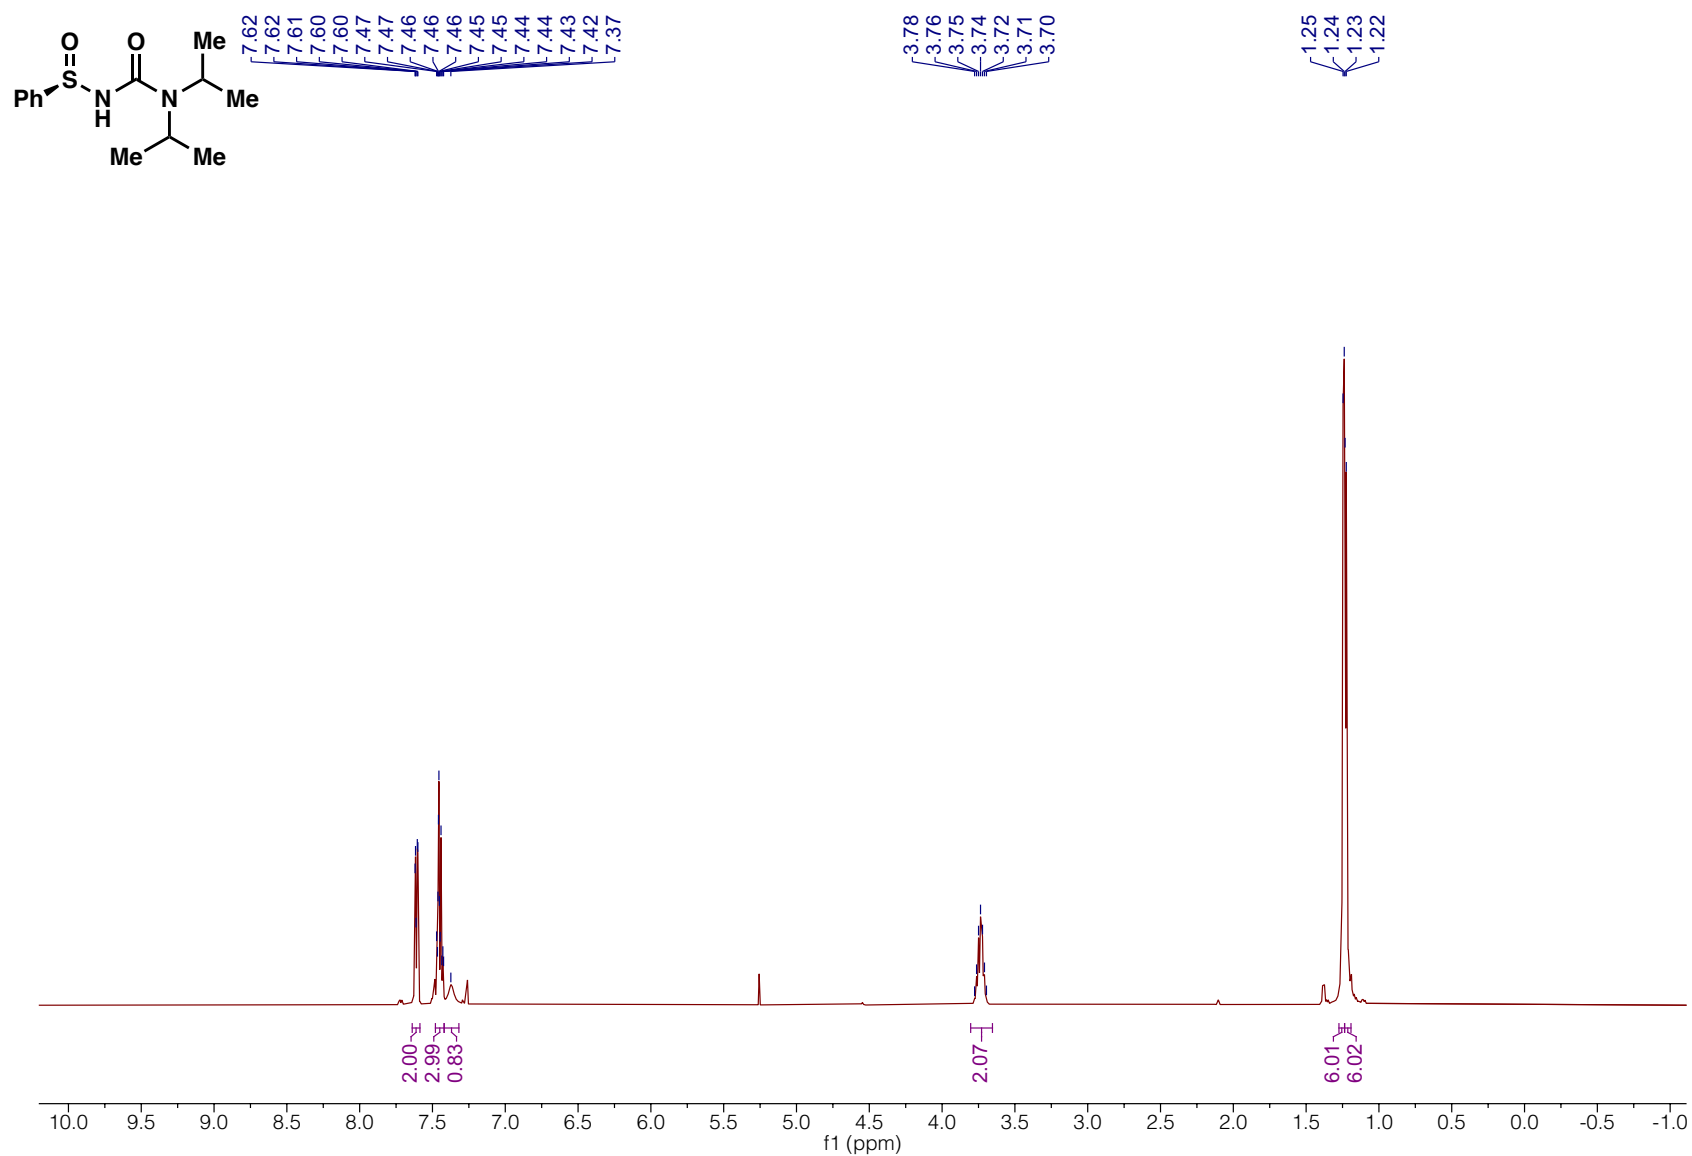

**<sup>13</sup>C NMR of phenyl sulfinyl urea:**

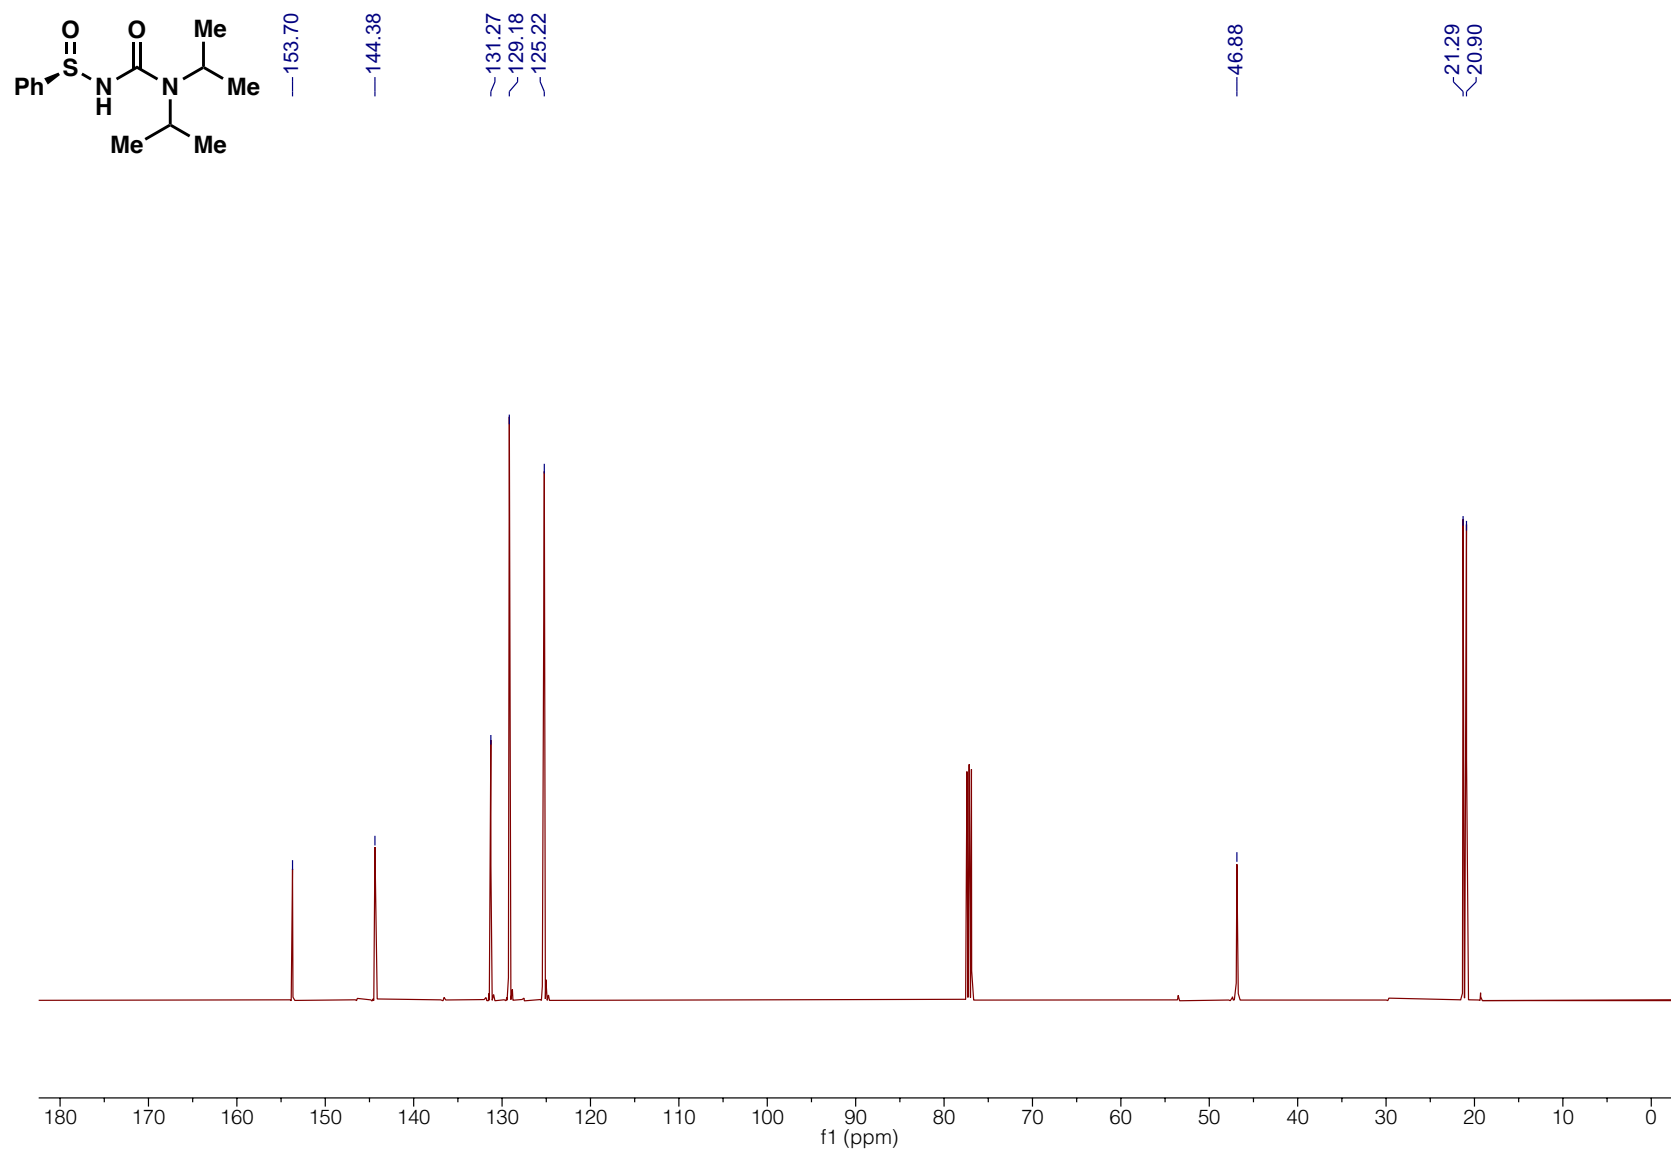

**<sup>1</sup>H NMR of compound S6a:**

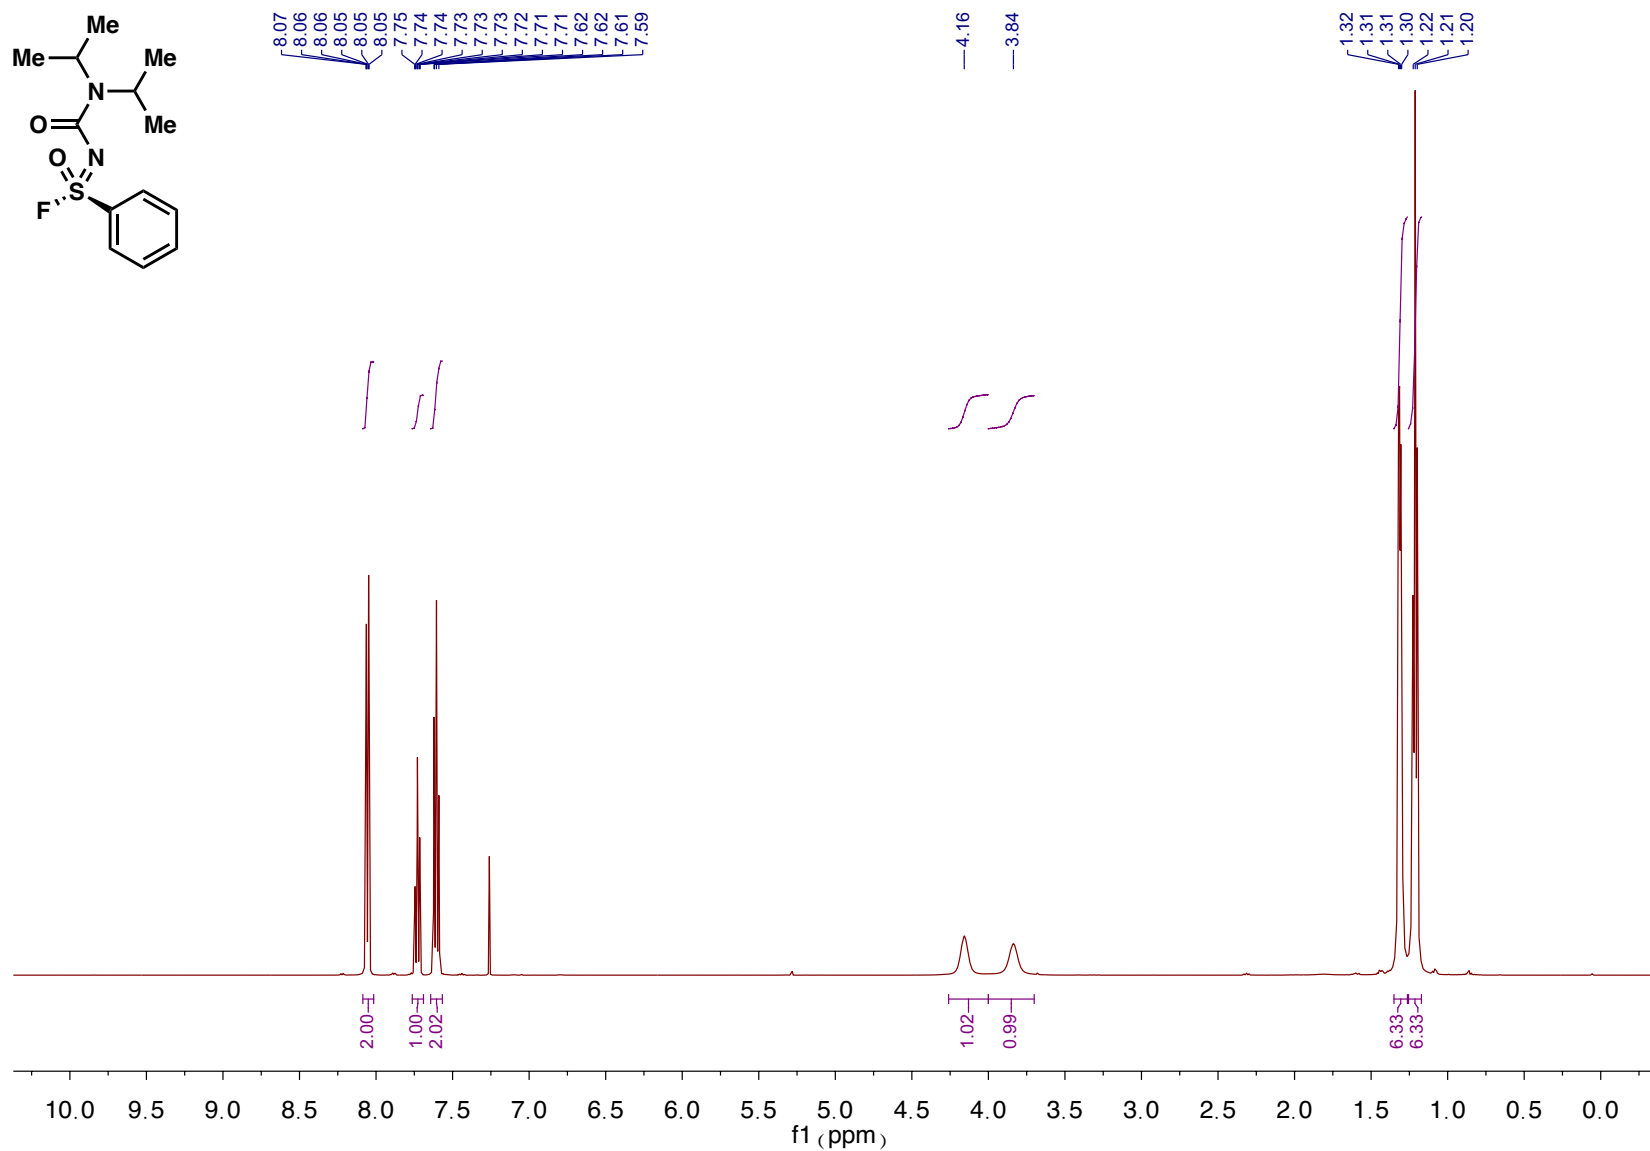

**$^{13}\text{C}$  NMR of compound S6a:**

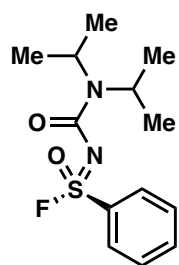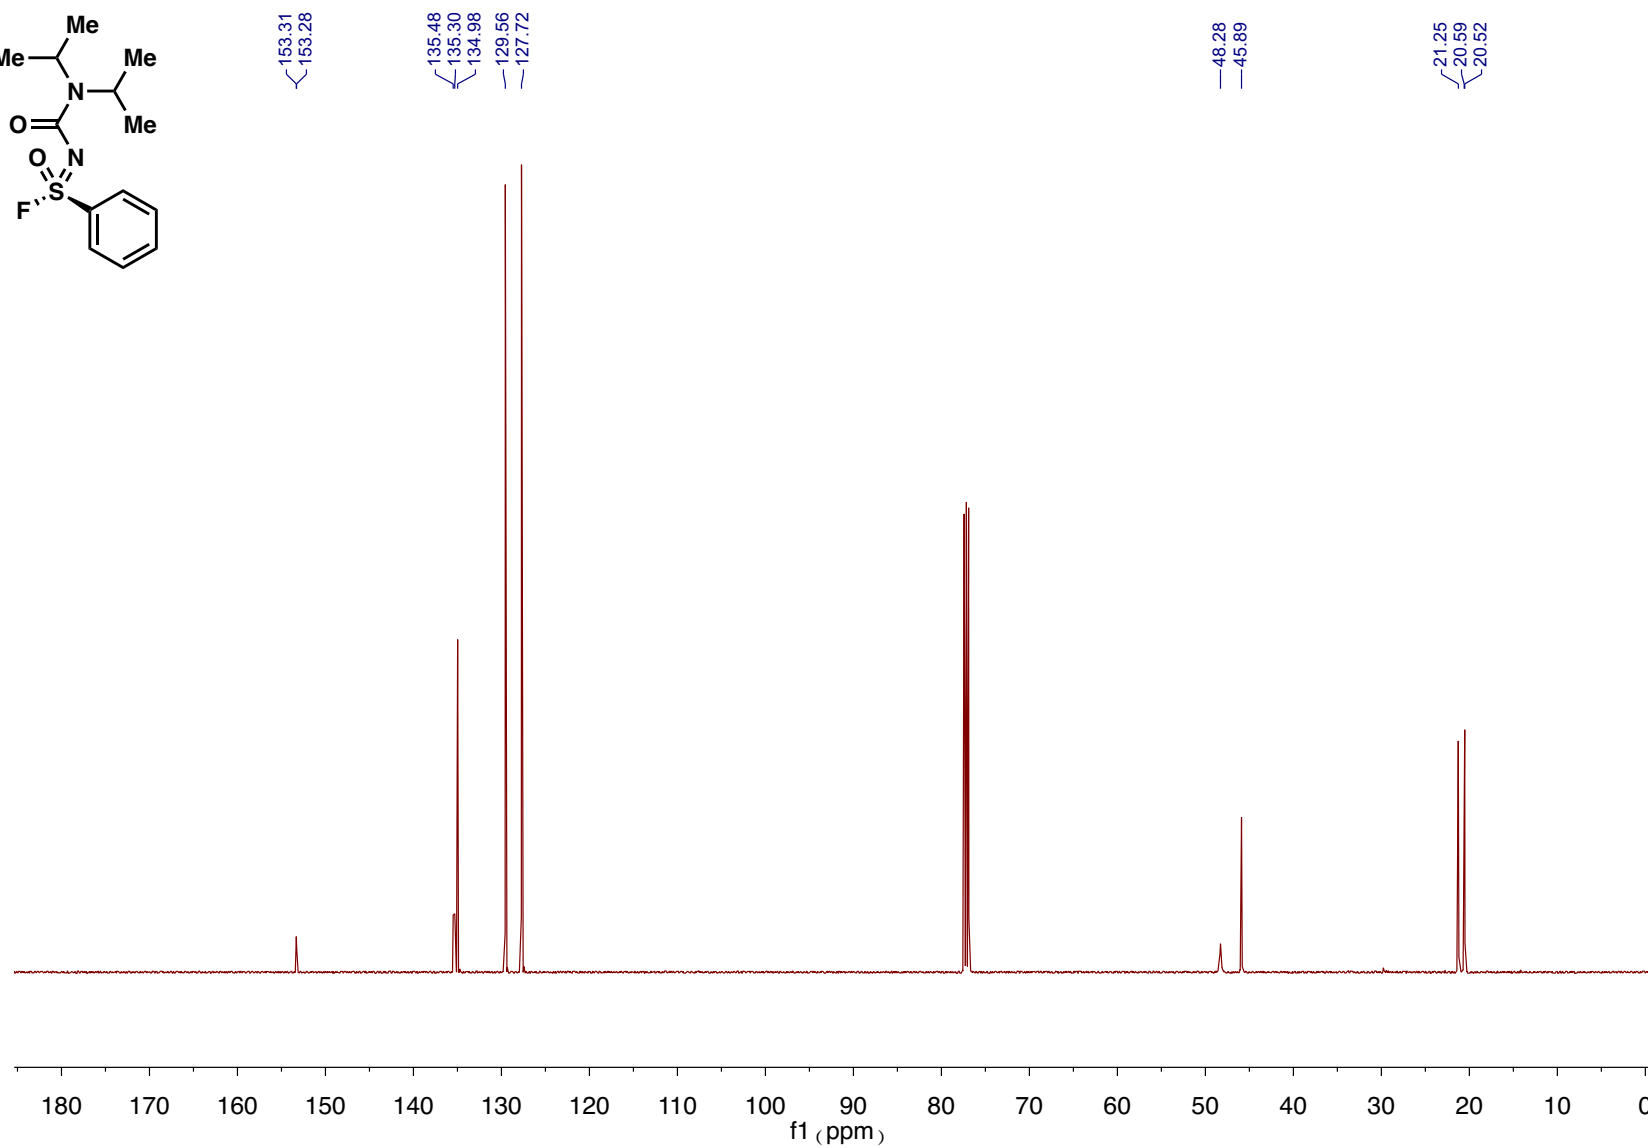

**$^{19}\text{F}$  NMR of compound S6a:**

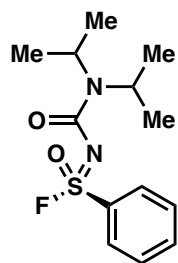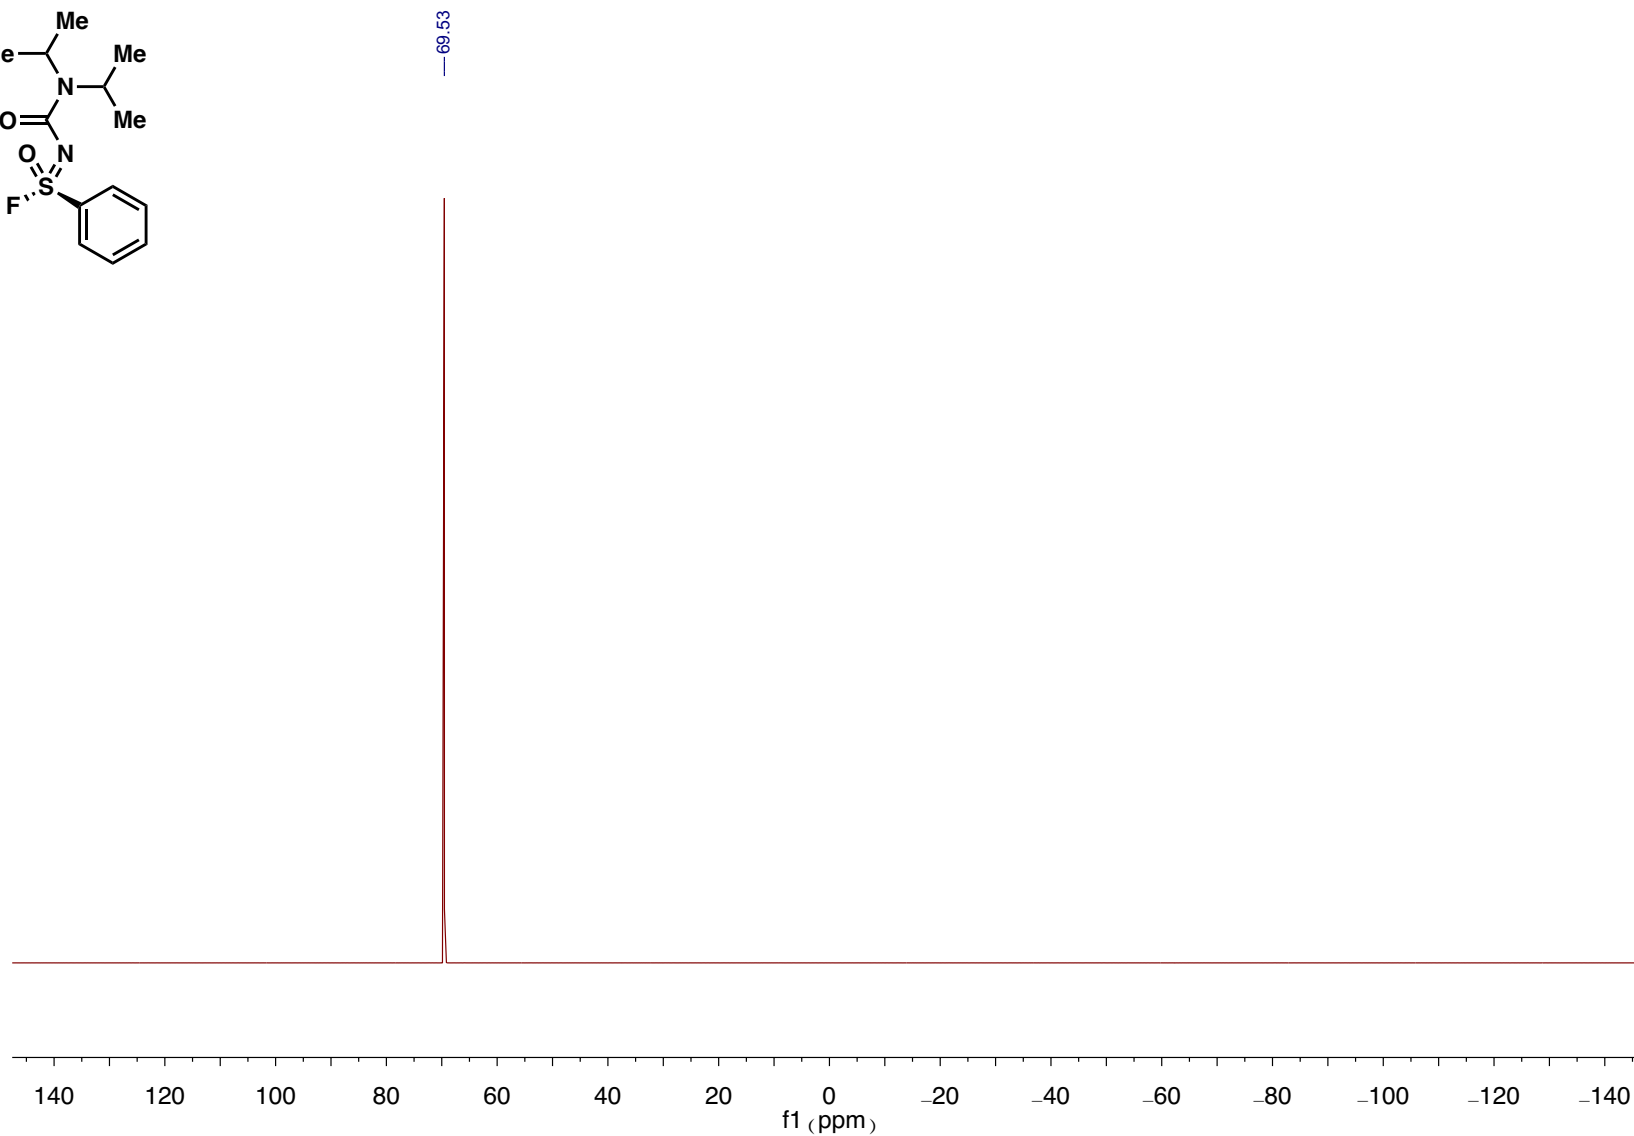

**<sup>1</sup>H NMR of 6b:**

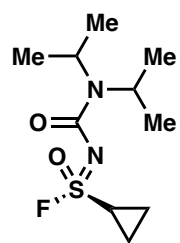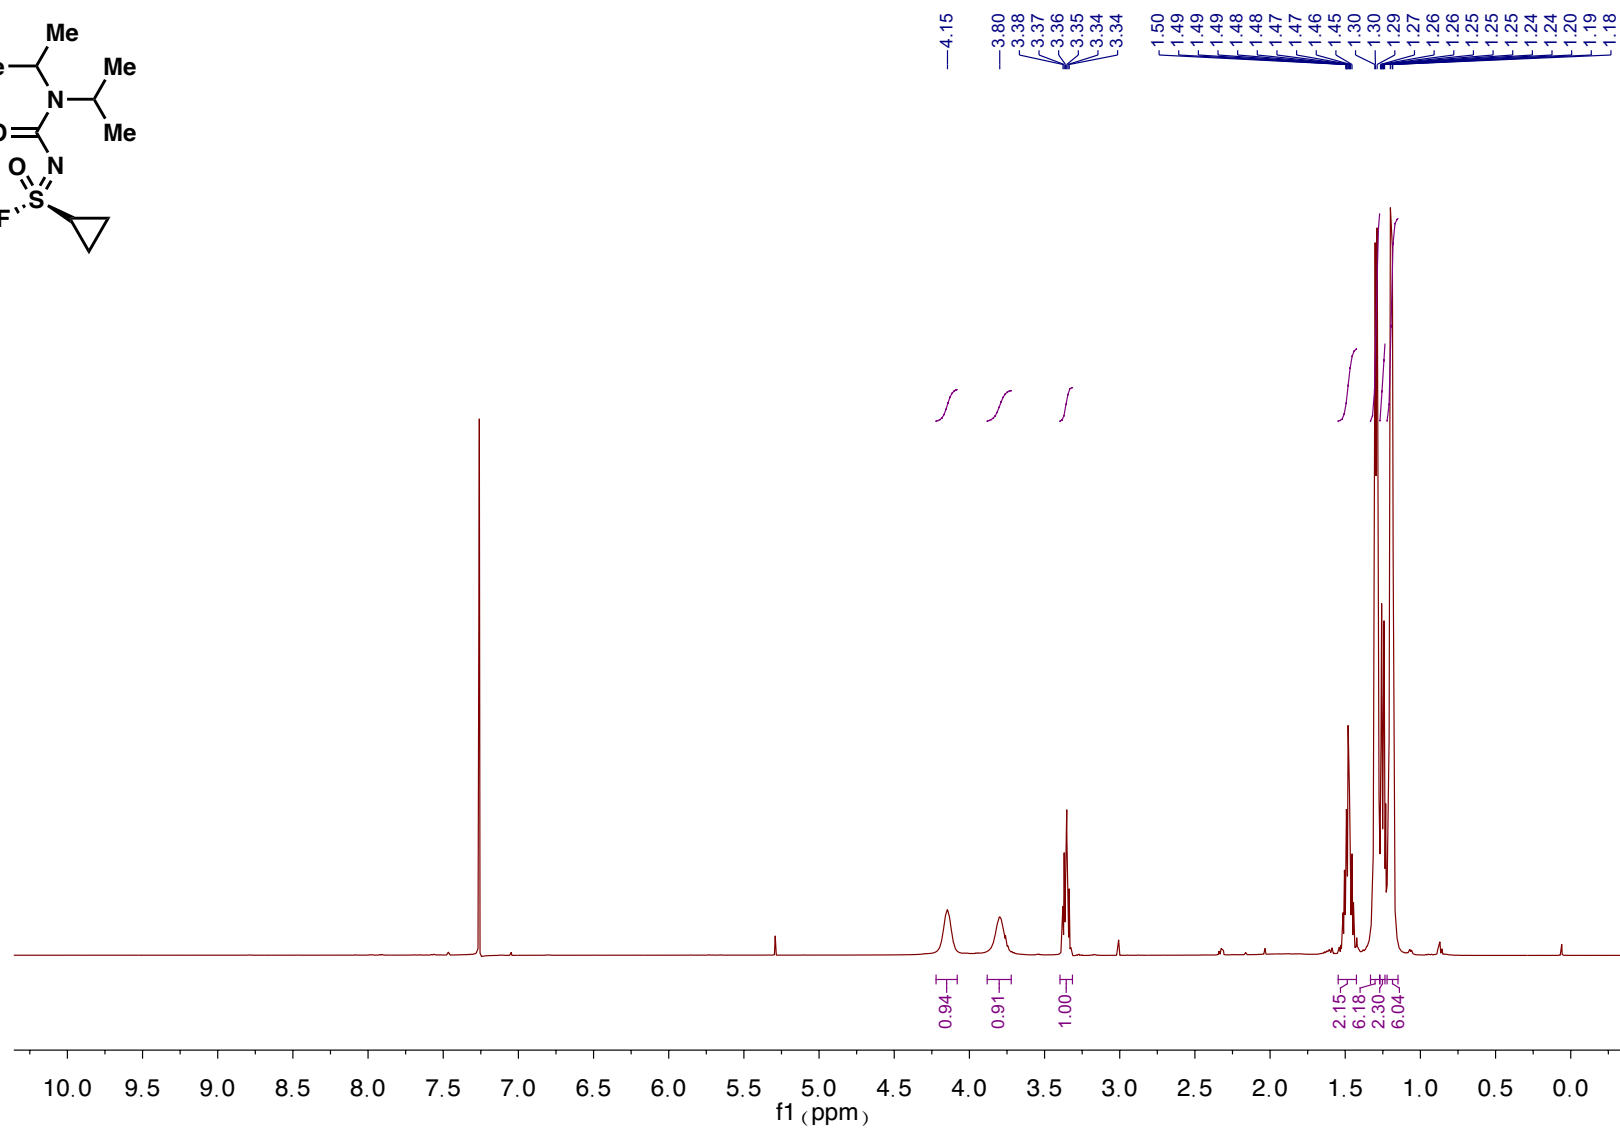

**$^{13}\text{C}$  NMR of 6b:**

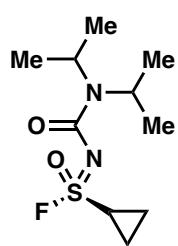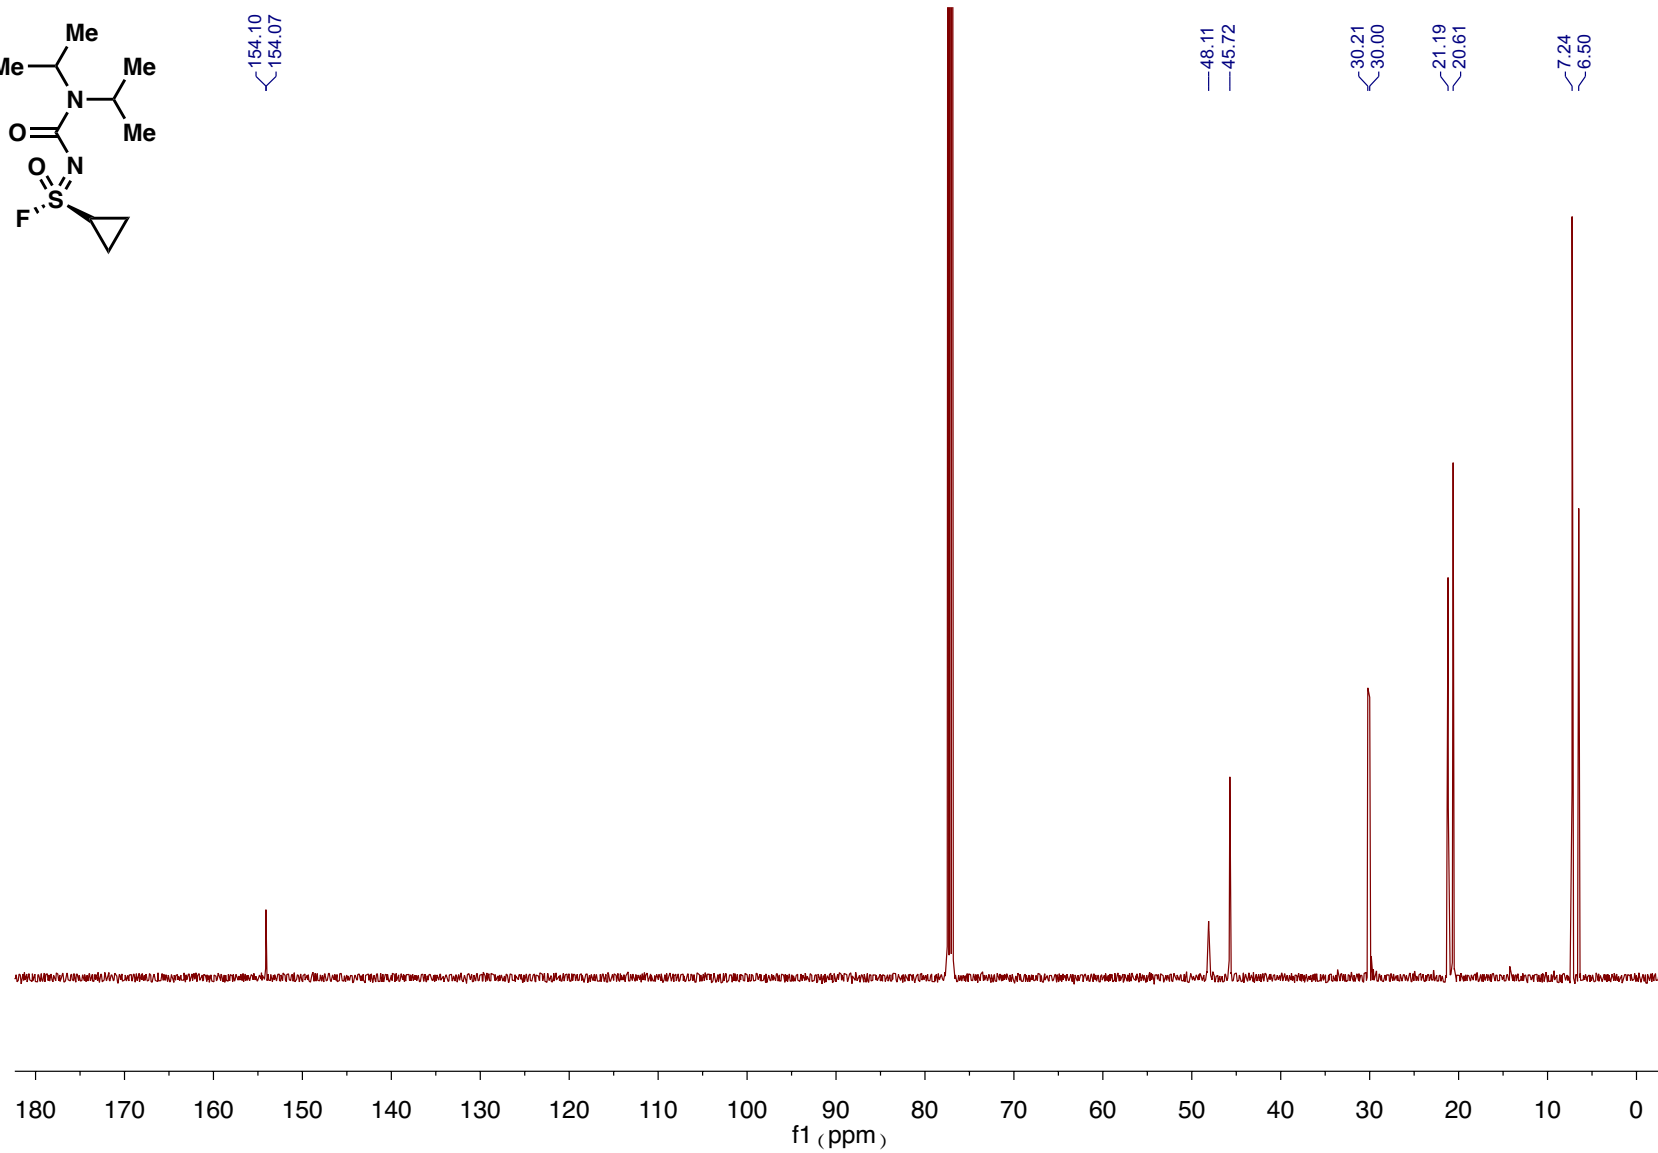

**$^{19}\text{F}$  NMR of 6b:**

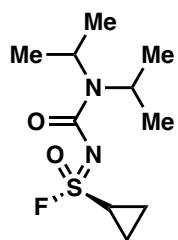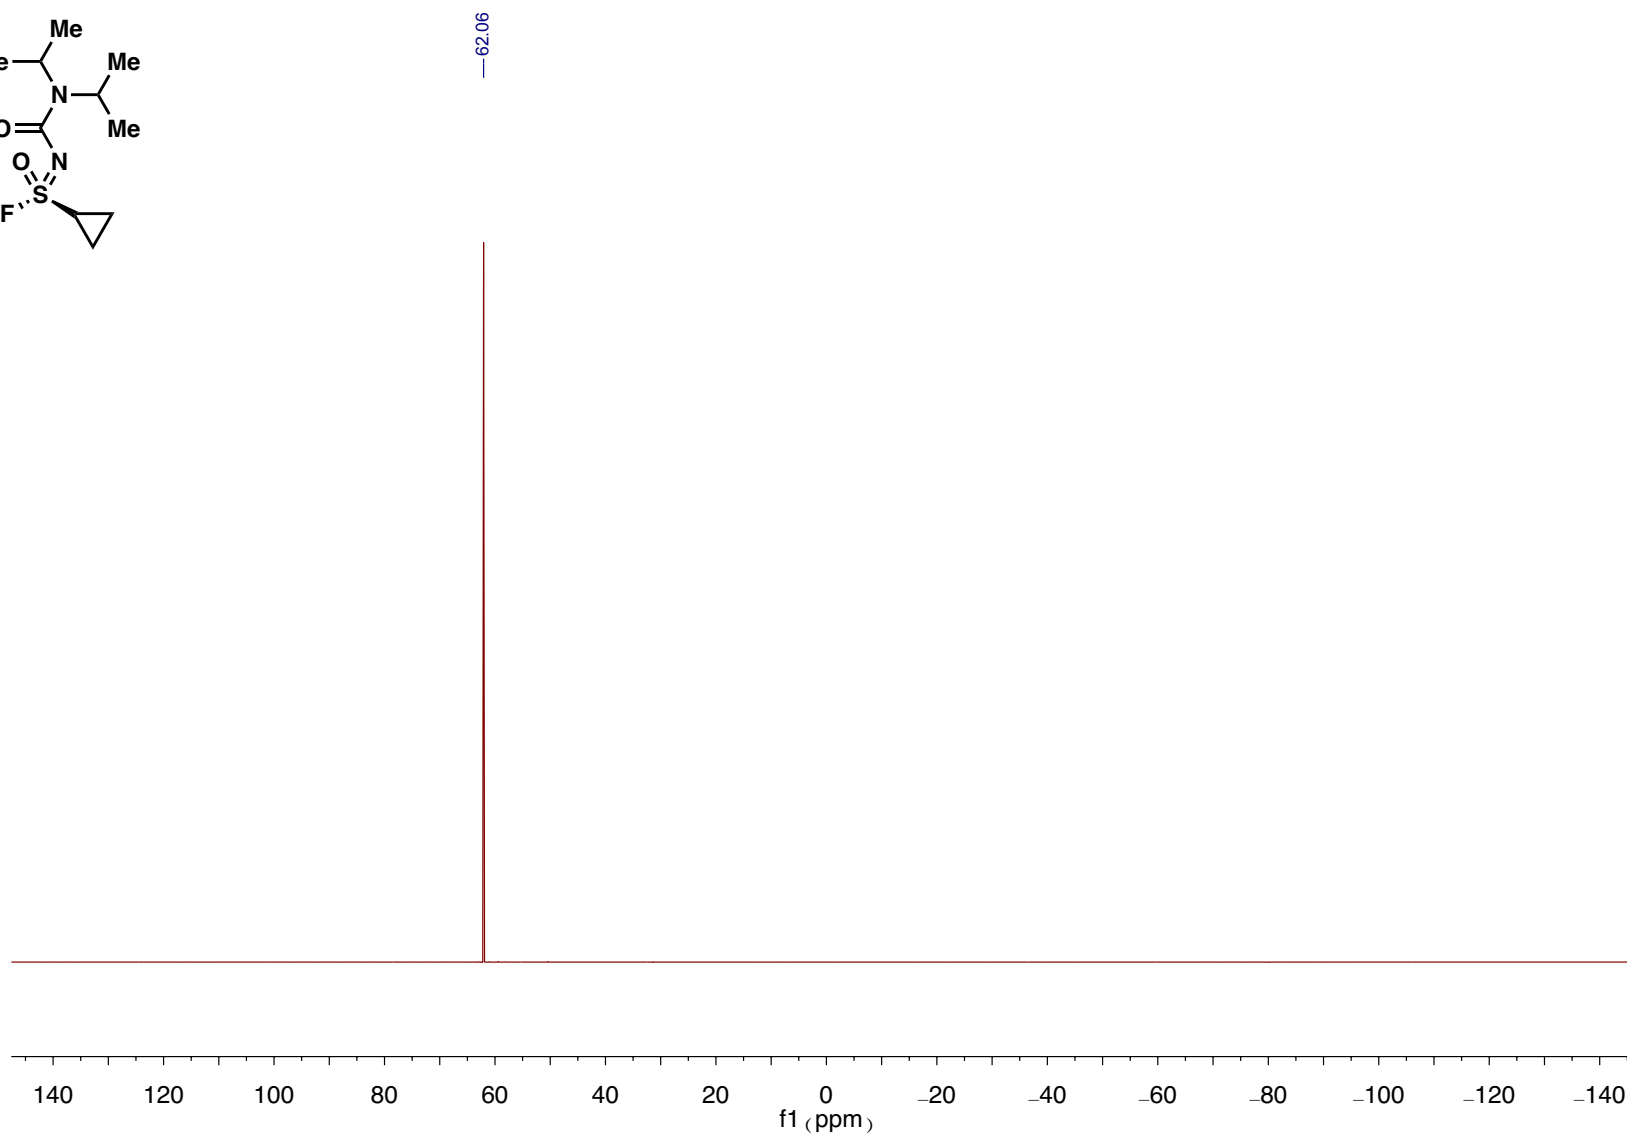

**<sup>1</sup>H NMR of compound 7a:**

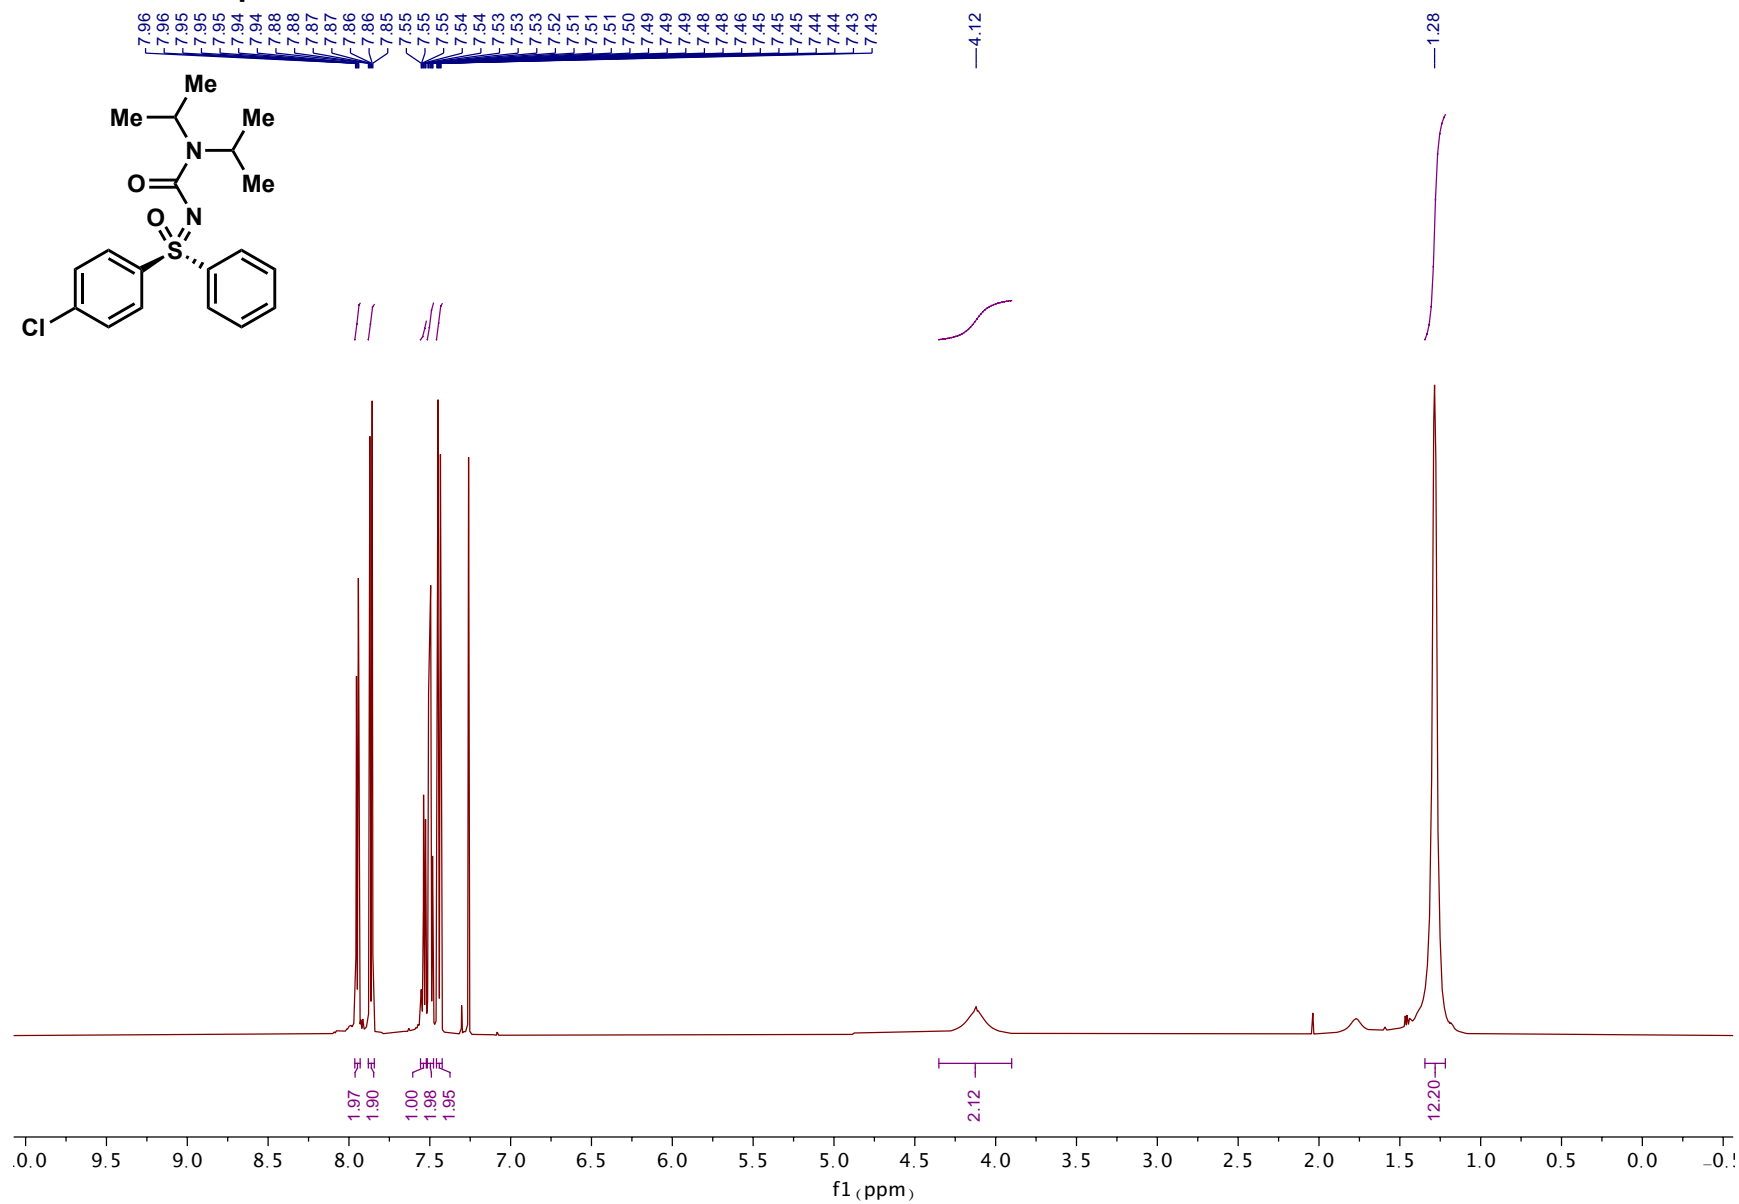

**$^{13}\text{C}$  NMR of compound 7a:**

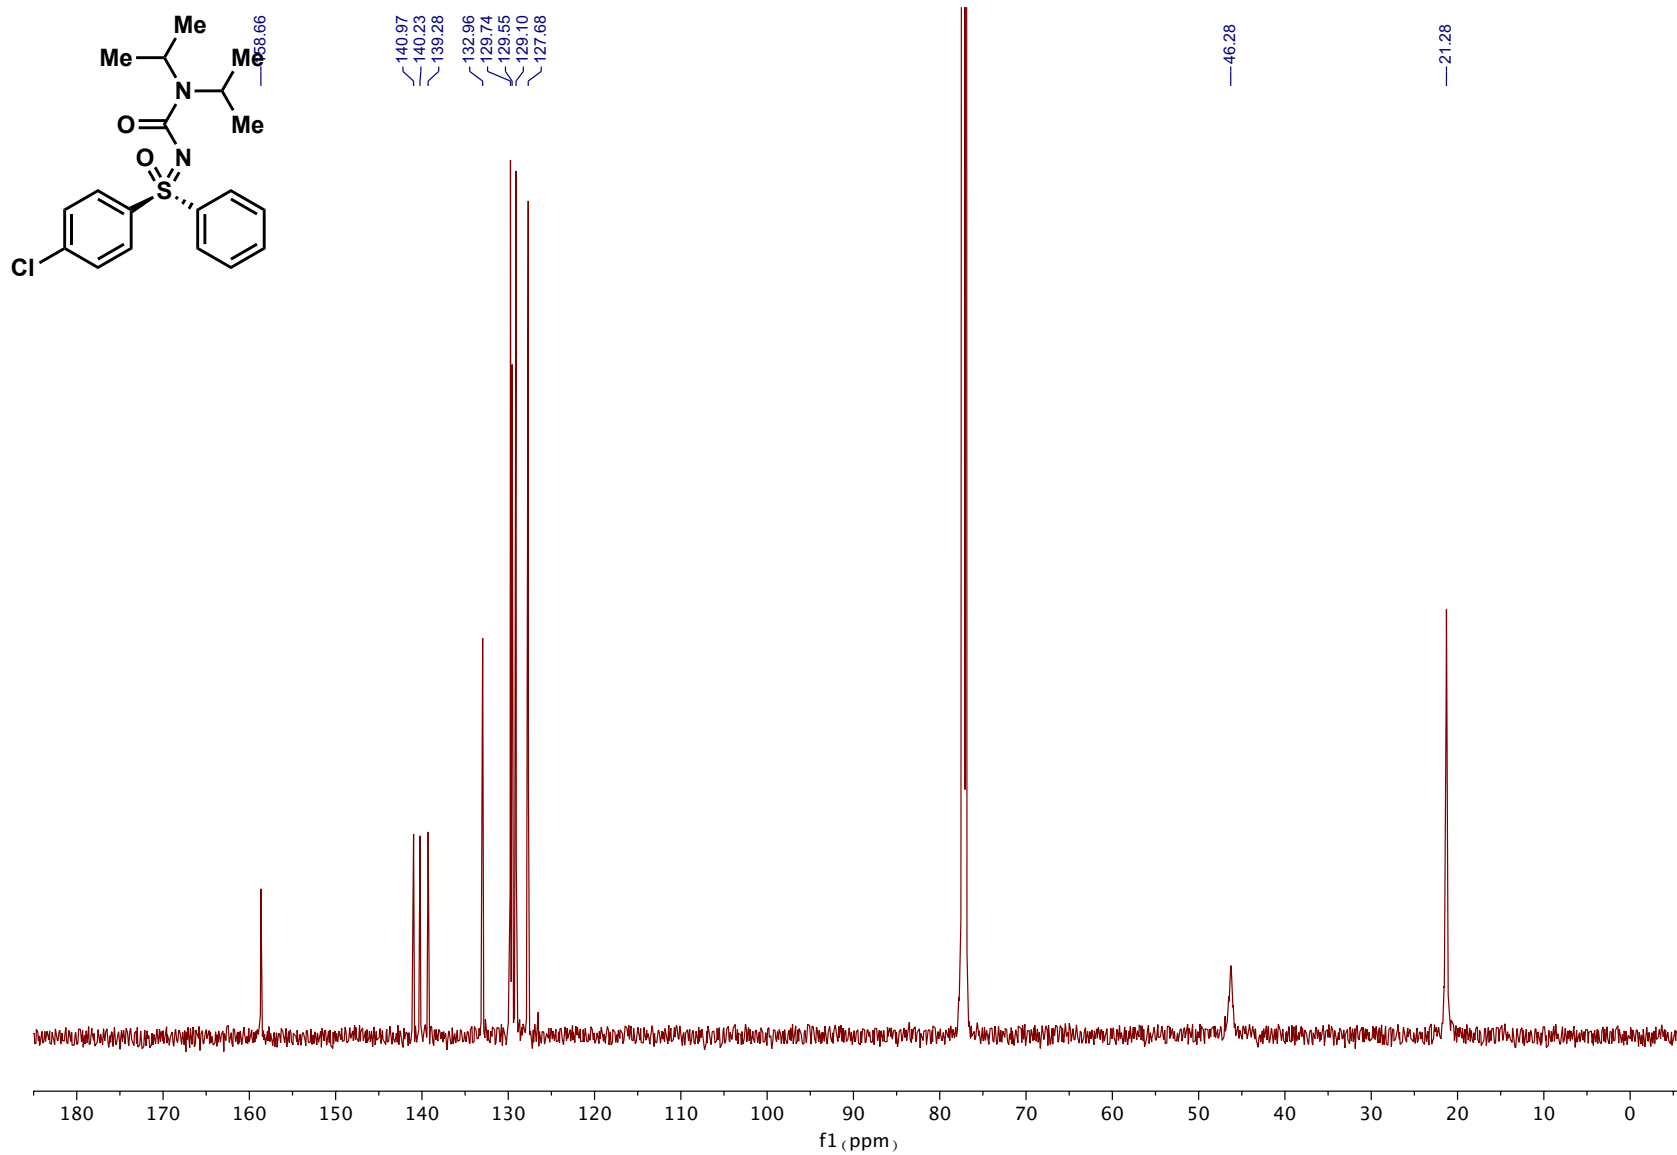

**<sup>1</sup>H NMR of compound 7b:**

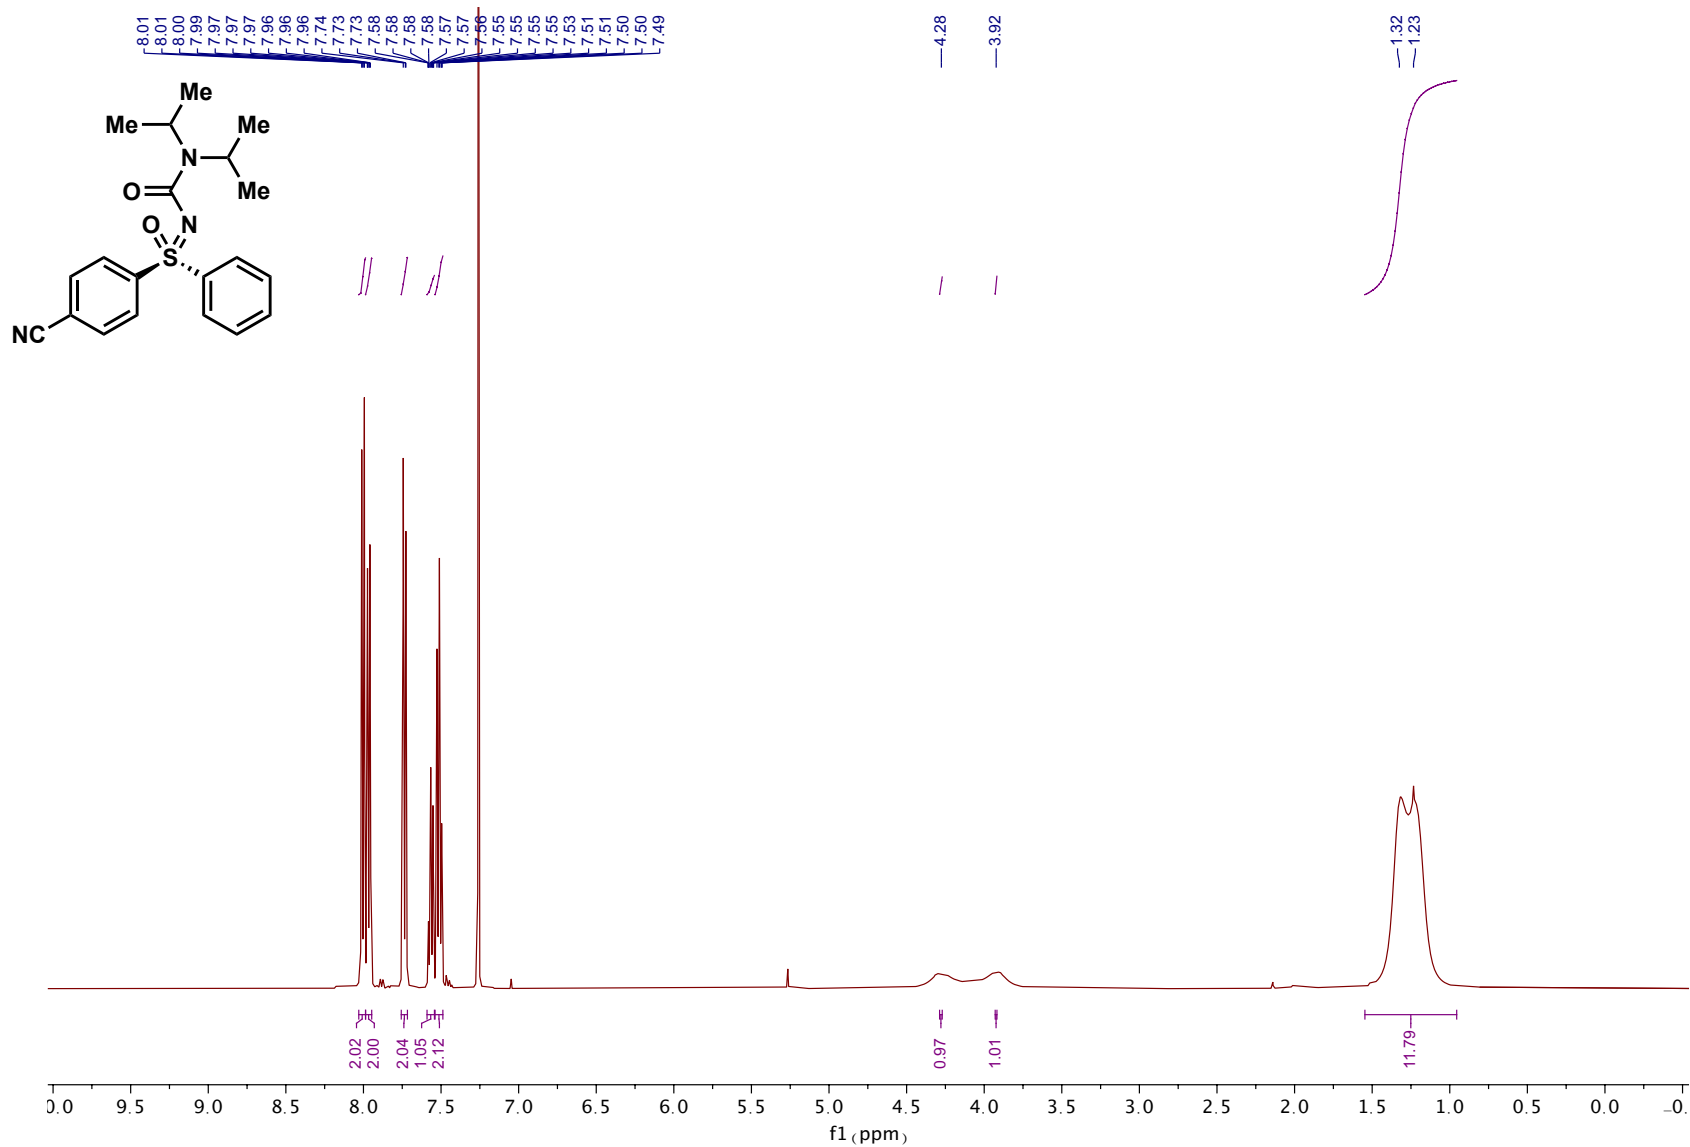

**$^{13}\text{C}$  NMR of compound 7b:**

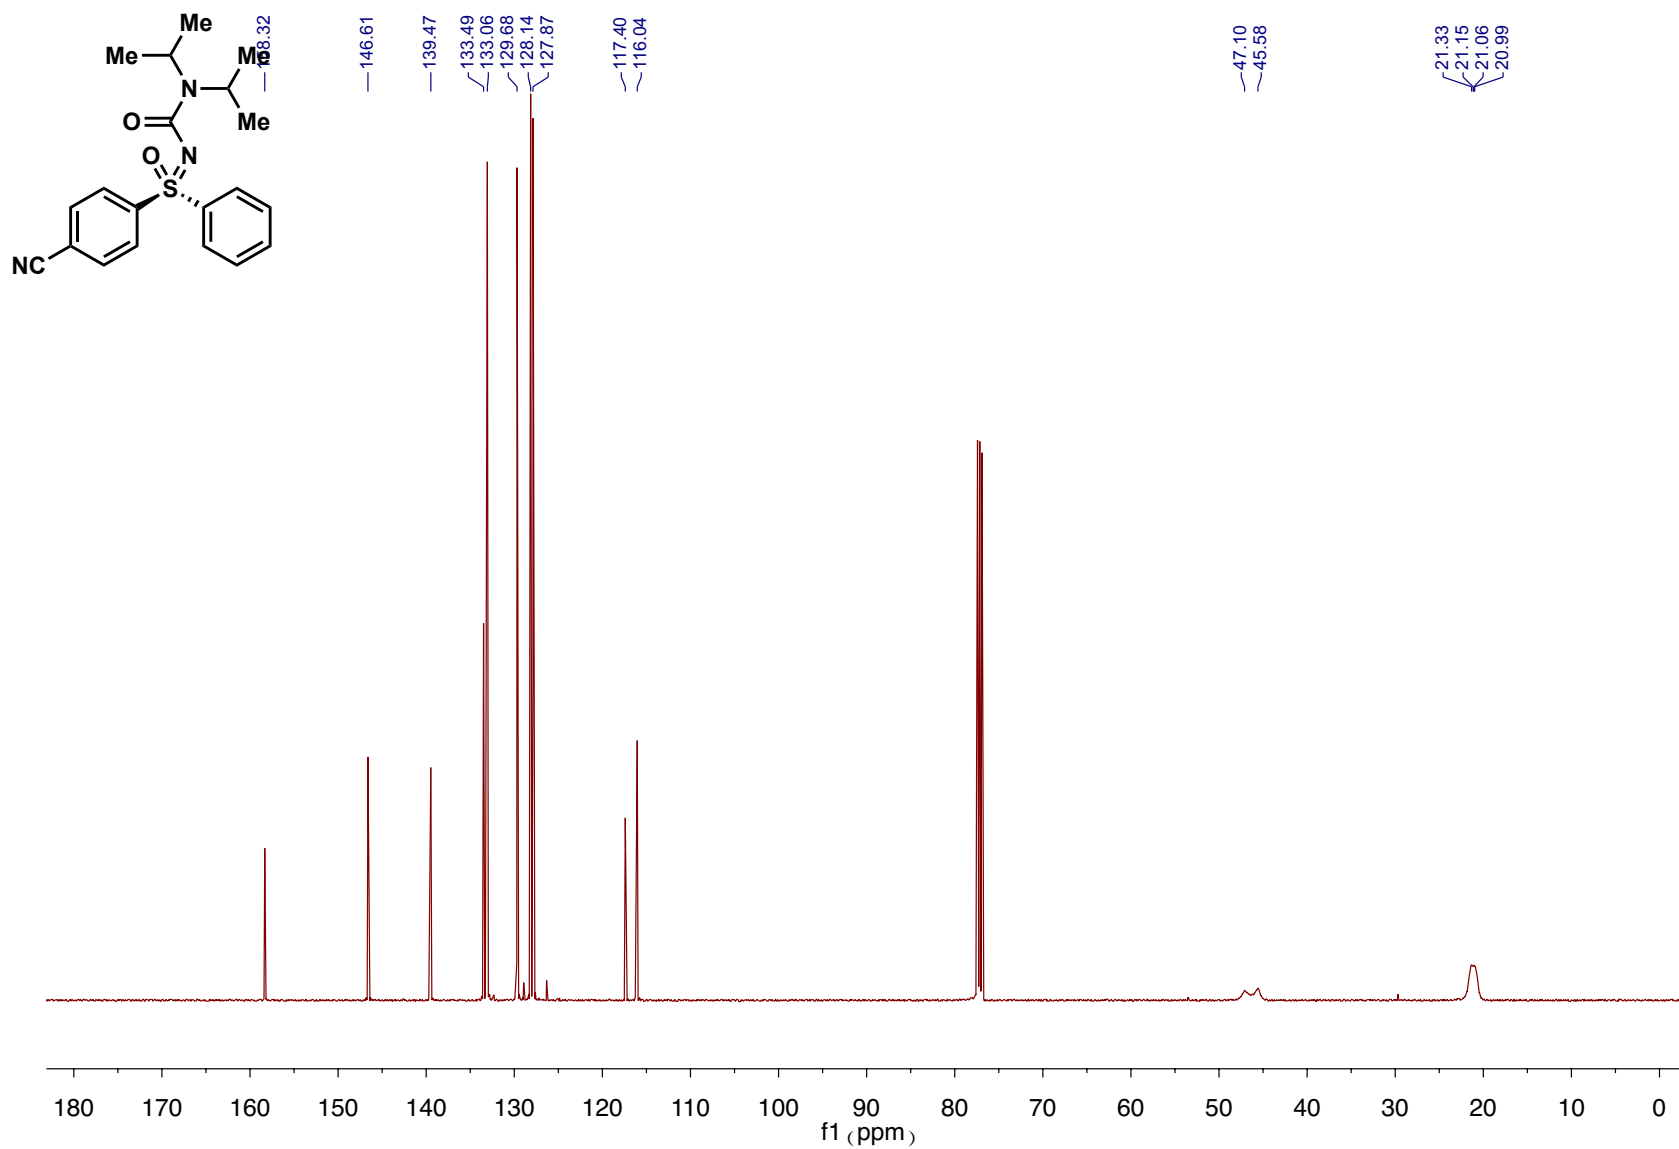

**<sup>1</sup>H NMR of compound 7c:**

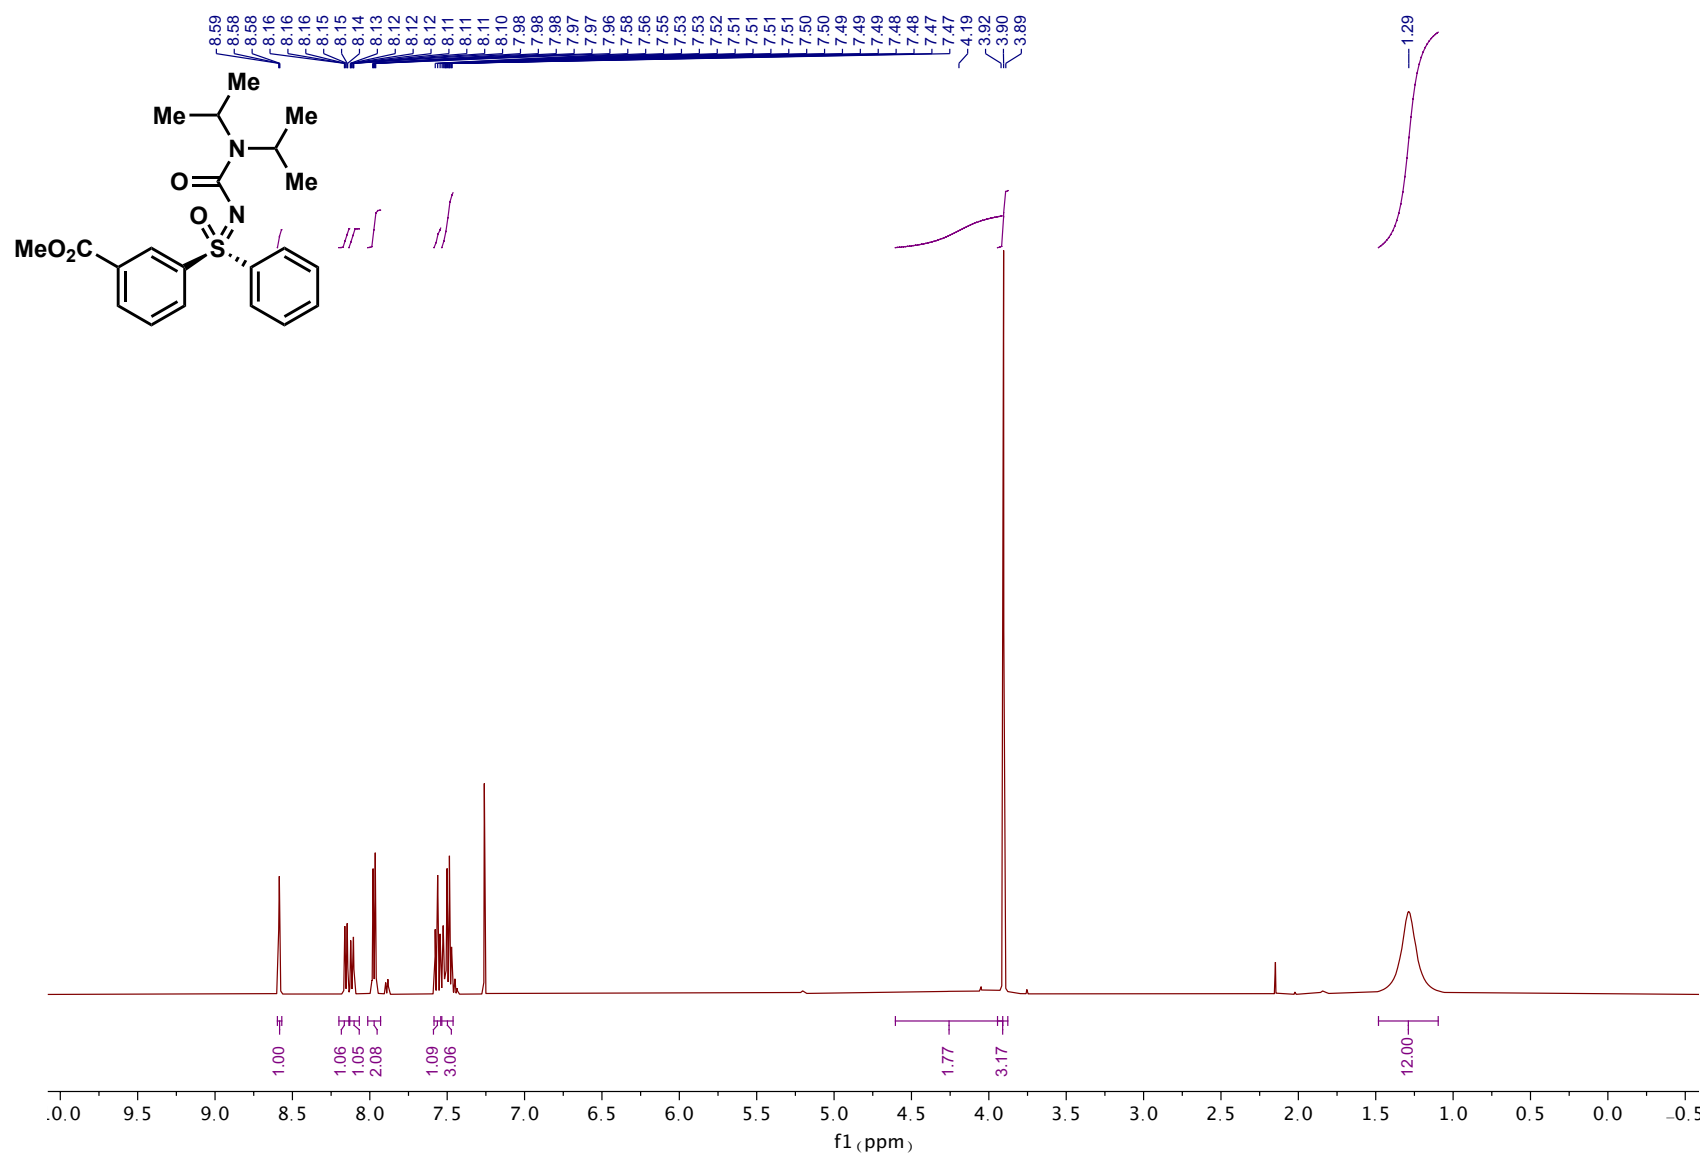

**$^{13}\text{C}$  NMR of compound 7c:**

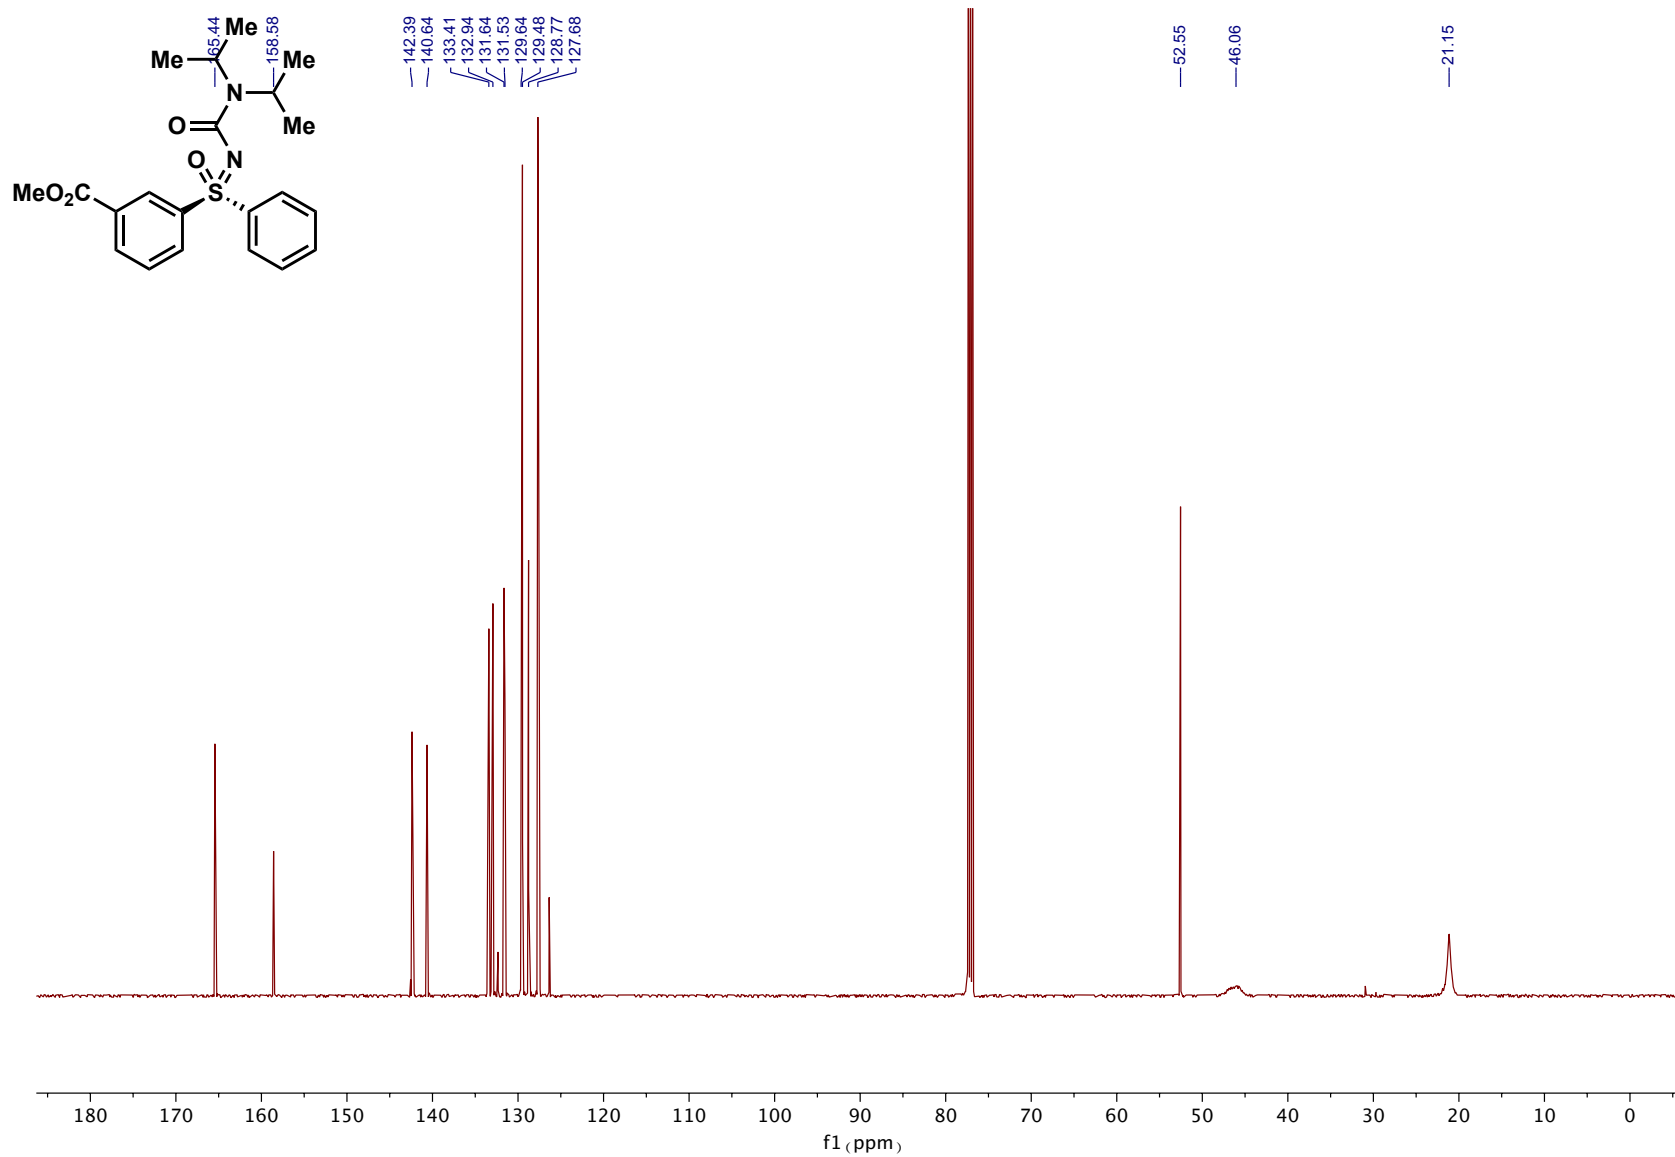

**<sup>1</sup>H NMR of compound 7d:**

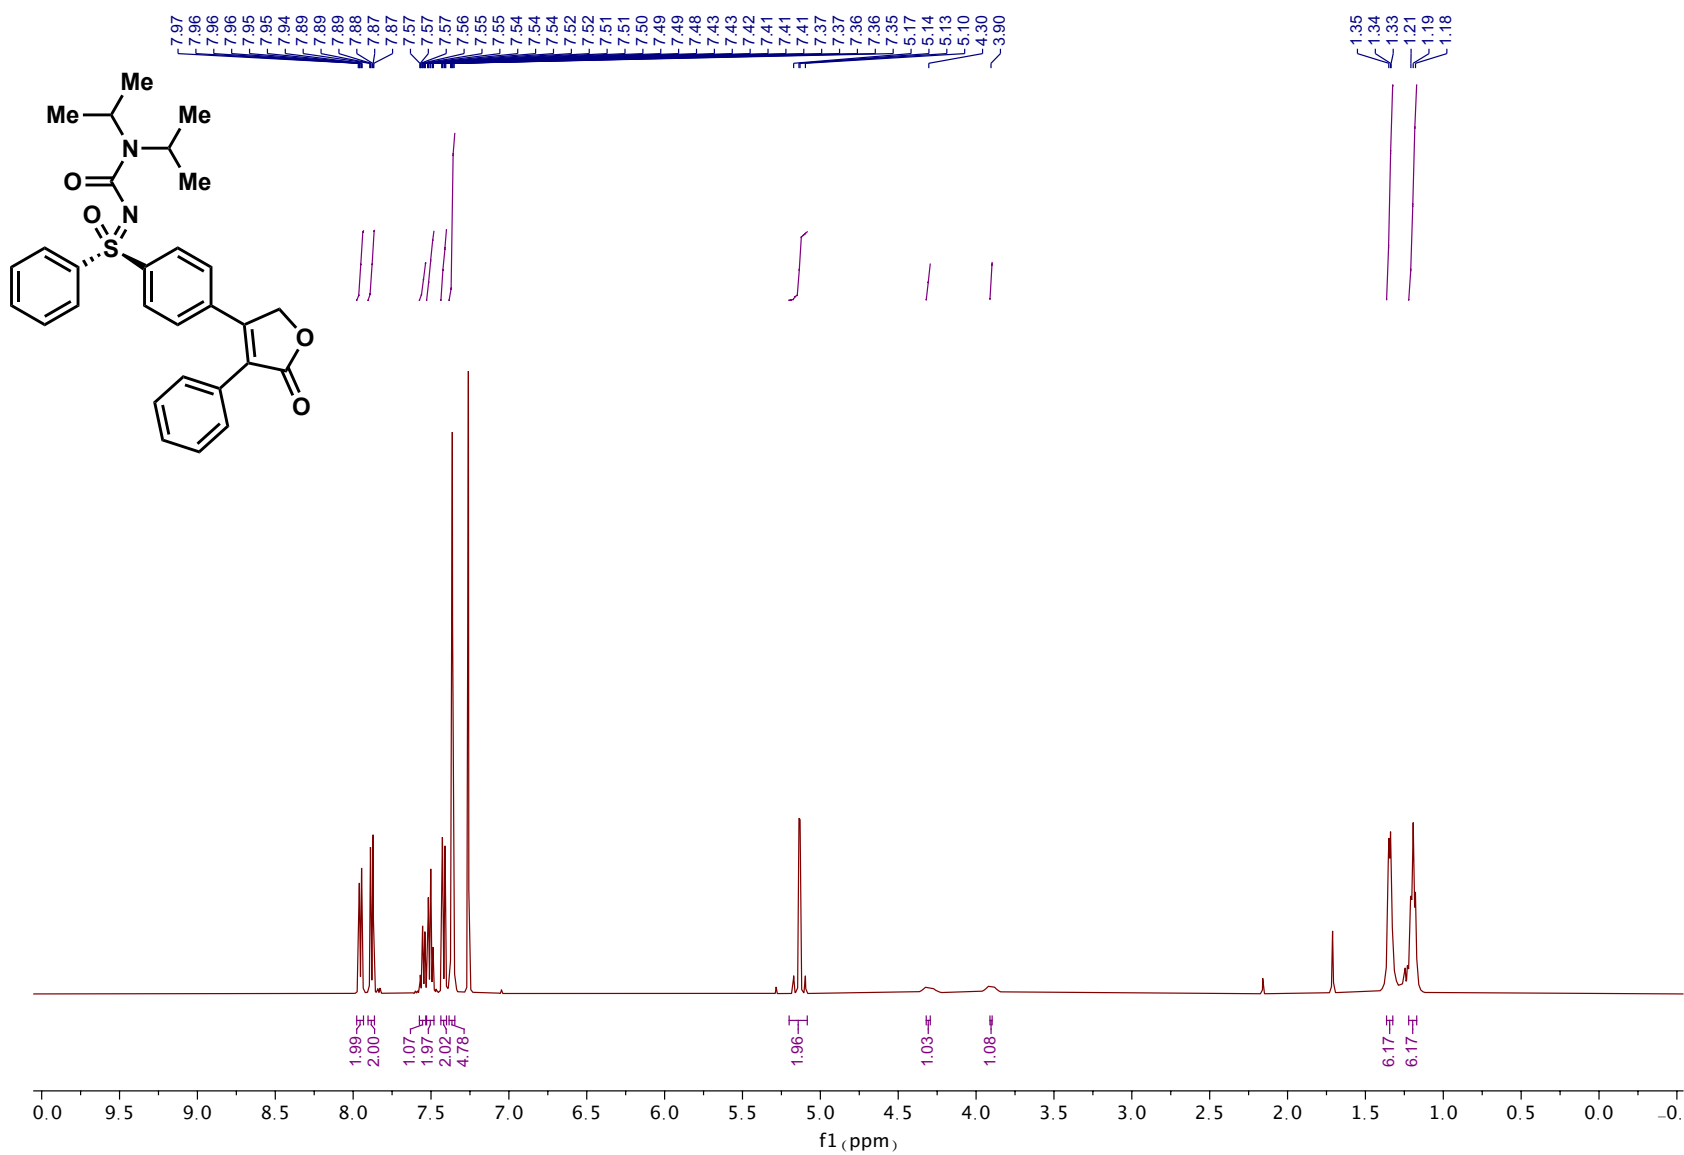

**$^{13}\text{C}$  NMR of compound 7d:**

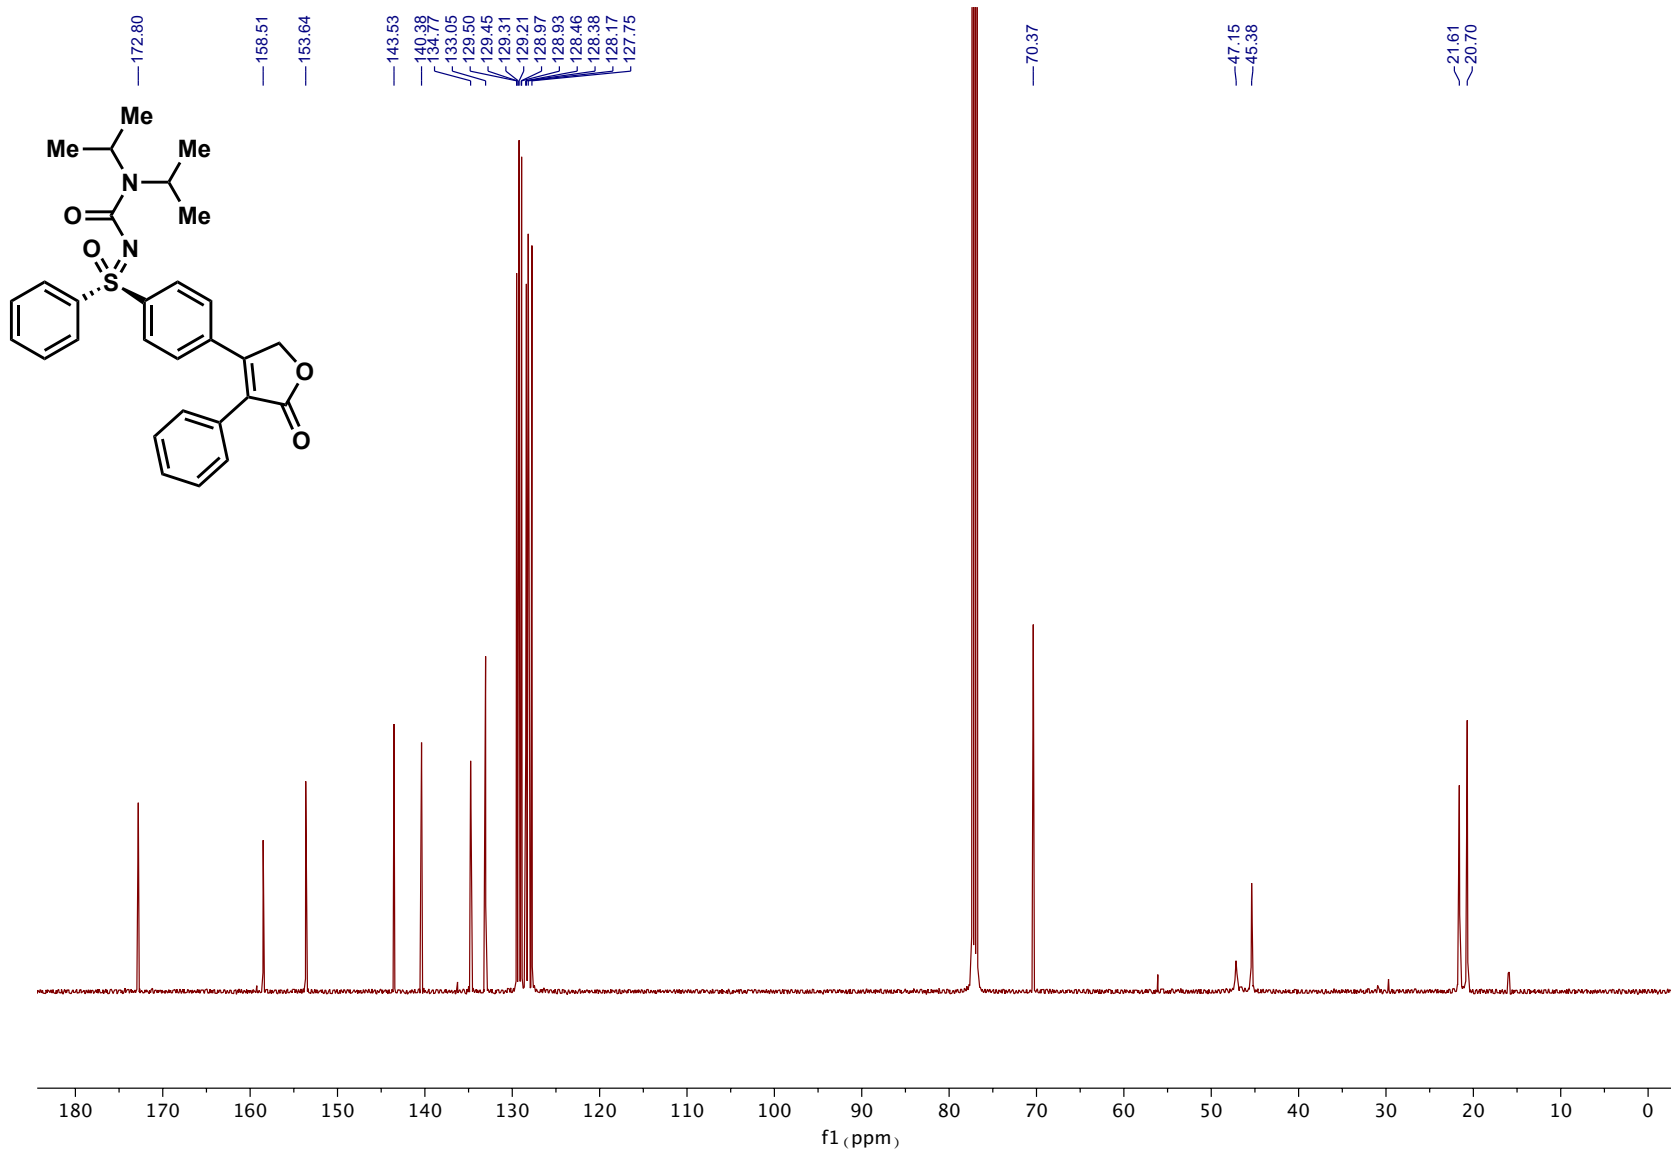

**<sup>1</sup>H NMR of compound 7e:**

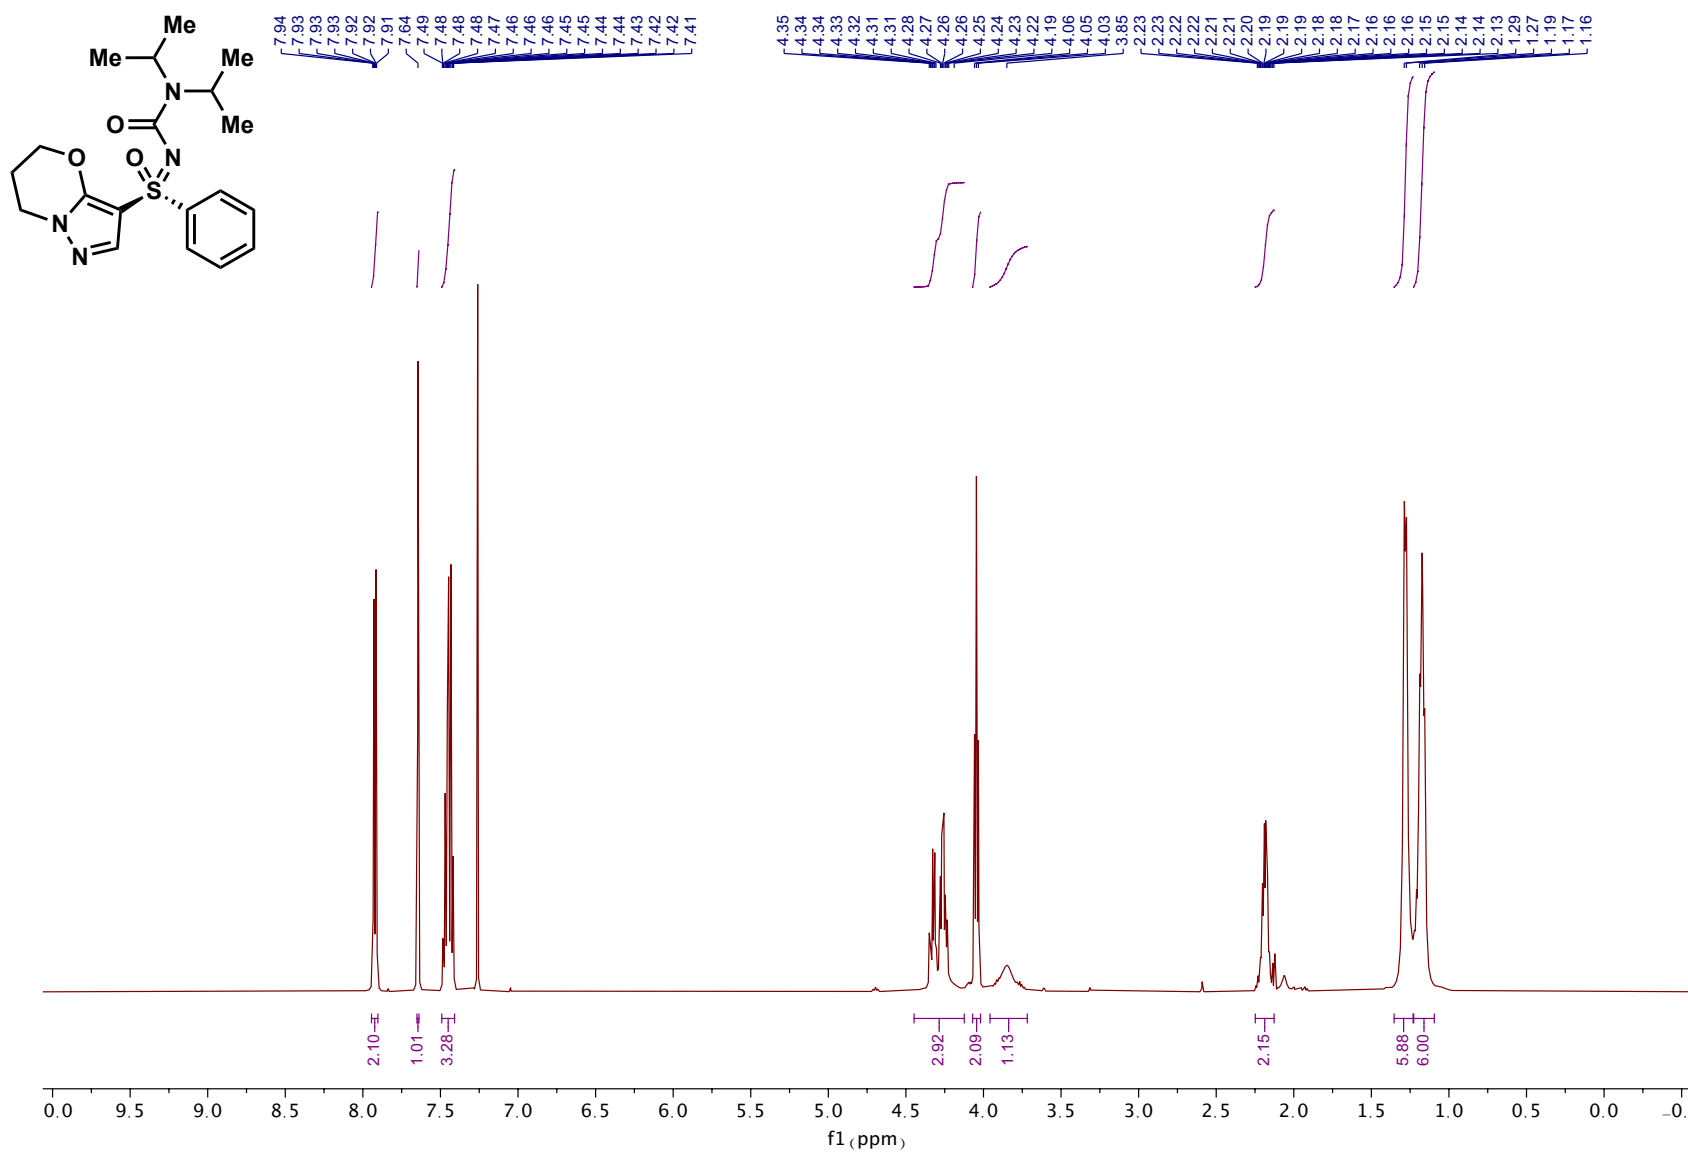

**$^{13}\text{C}$  NMR of compound 7e:**

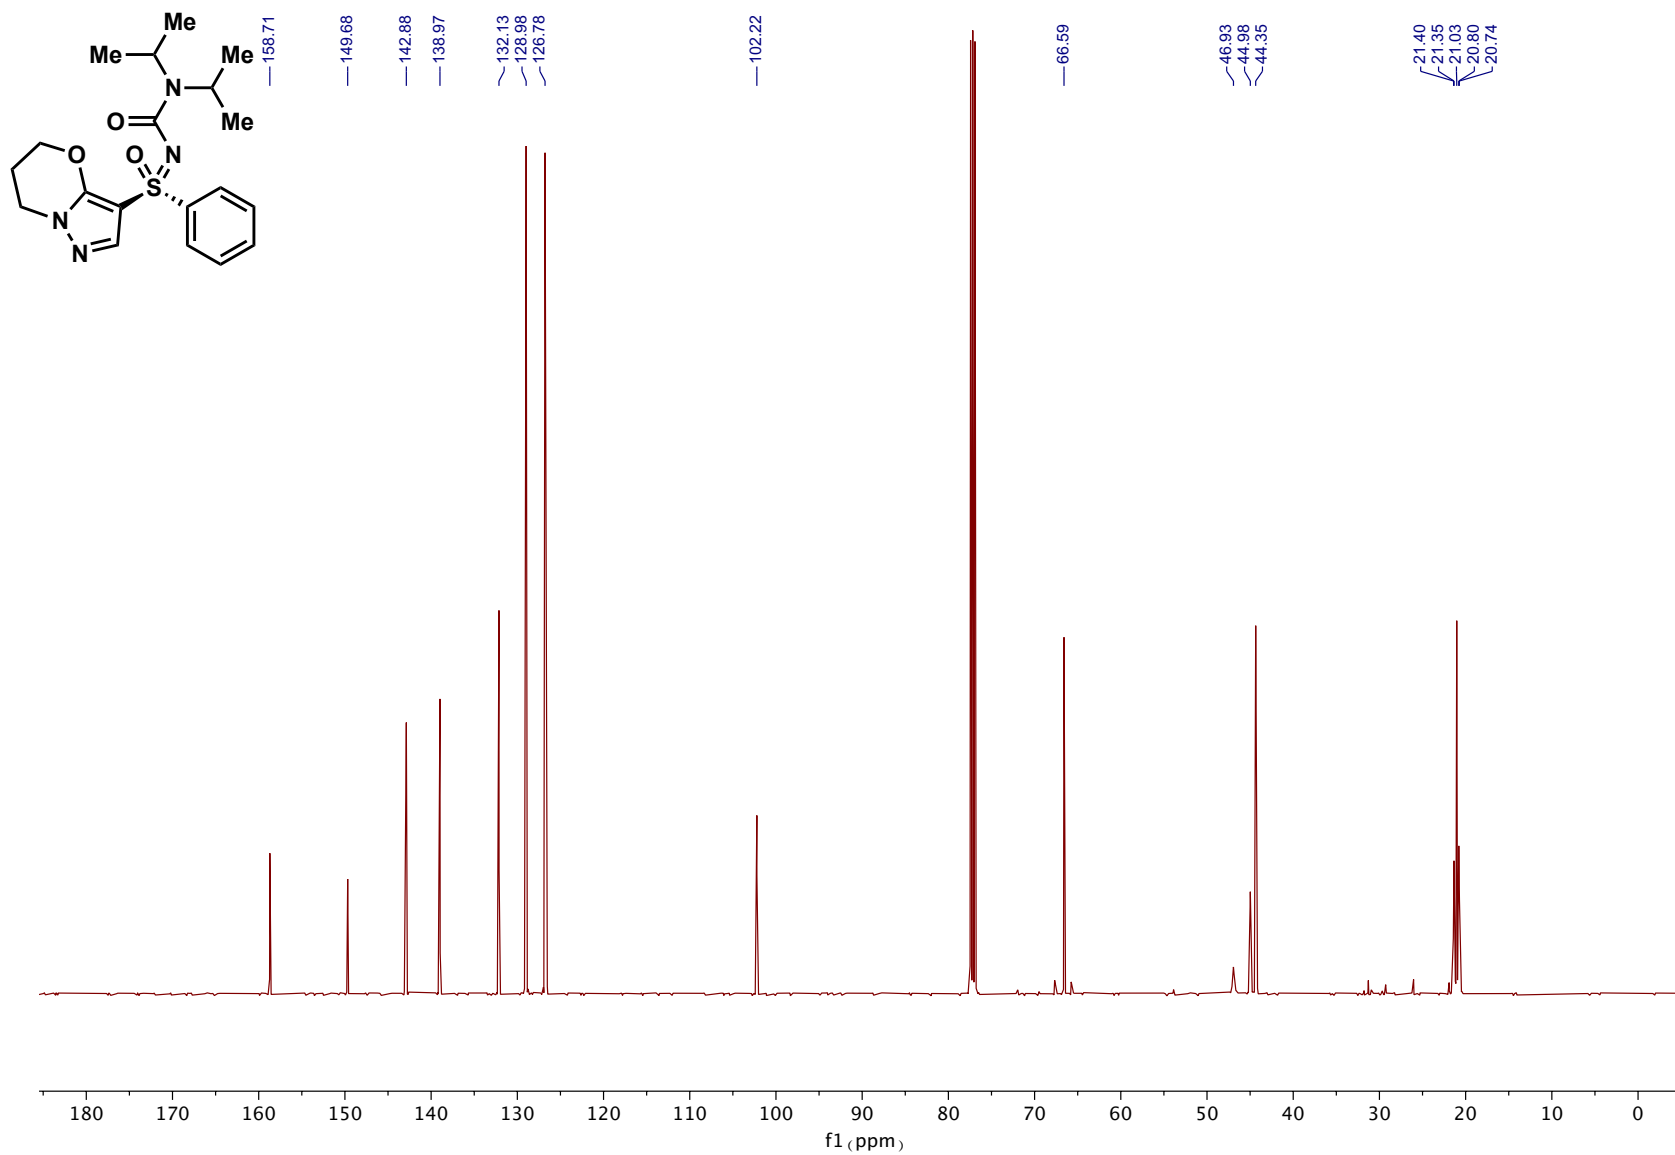

**<sup>1</sup>H NMR of compound 7f:**

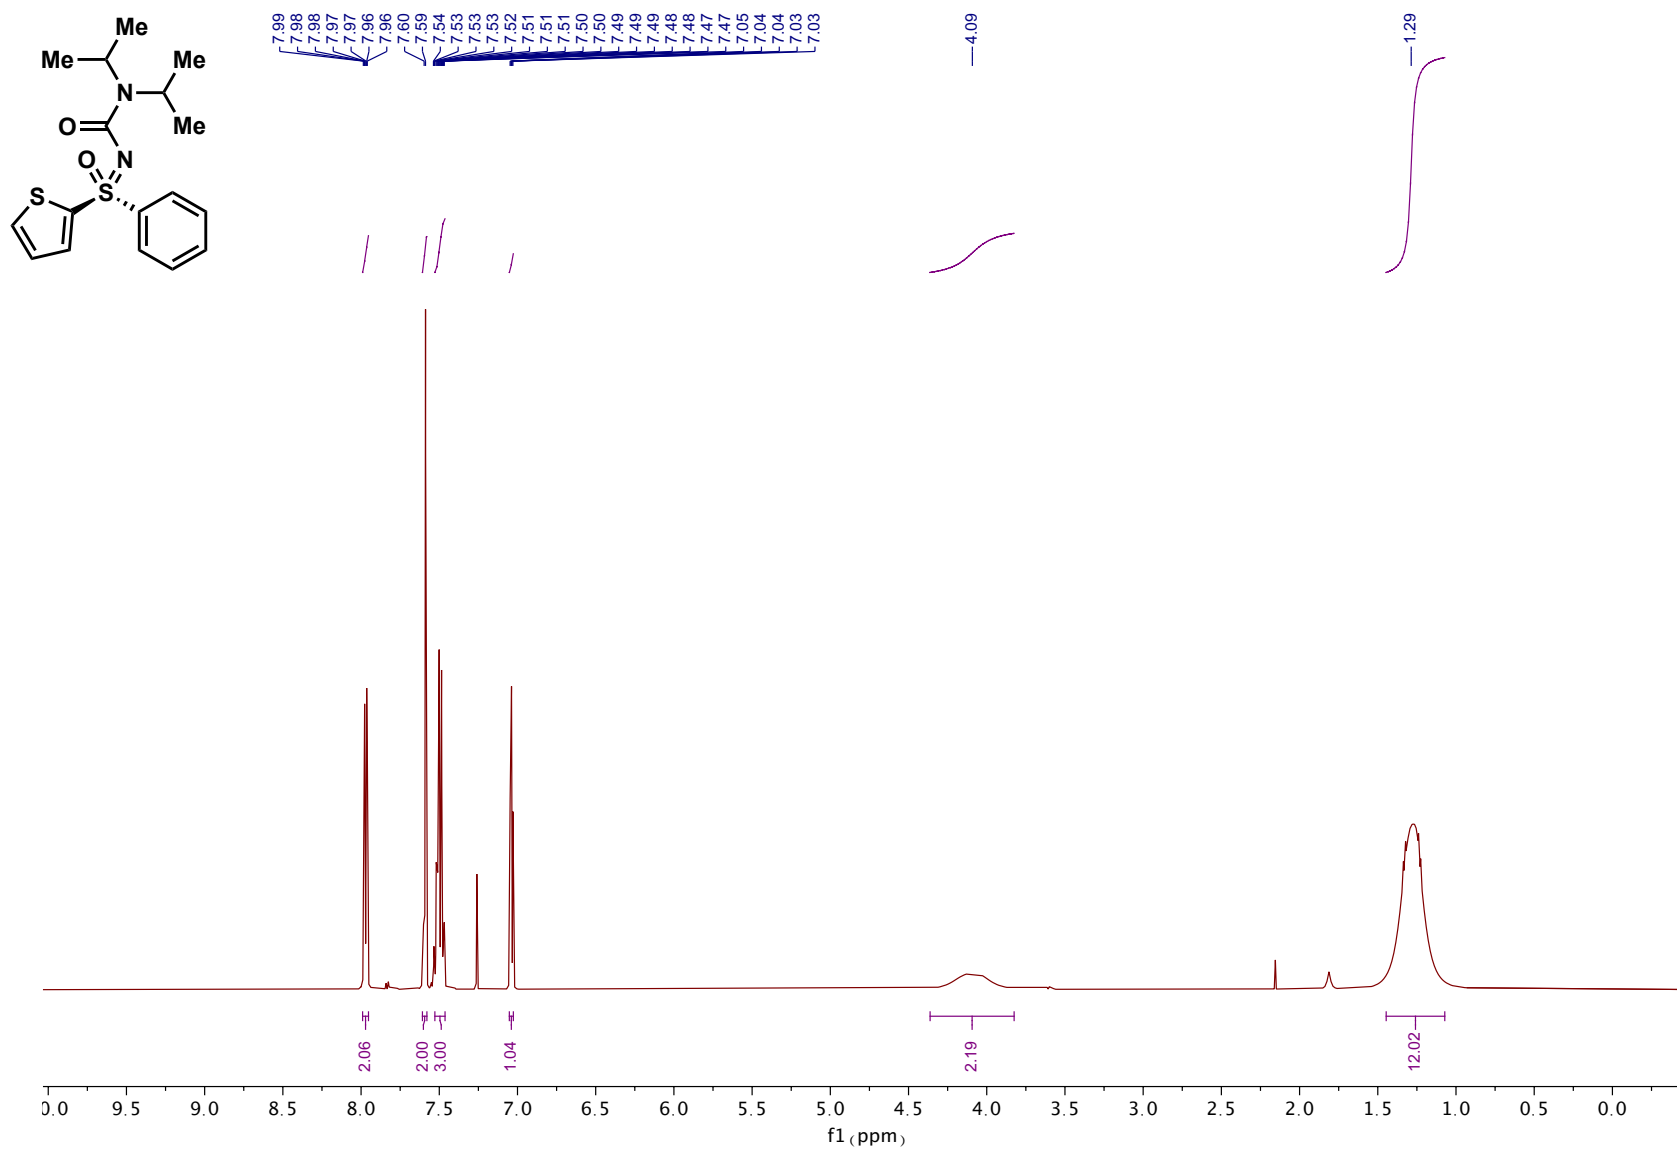

**$^{13}\text{C}$  NMR of compound 7f:**

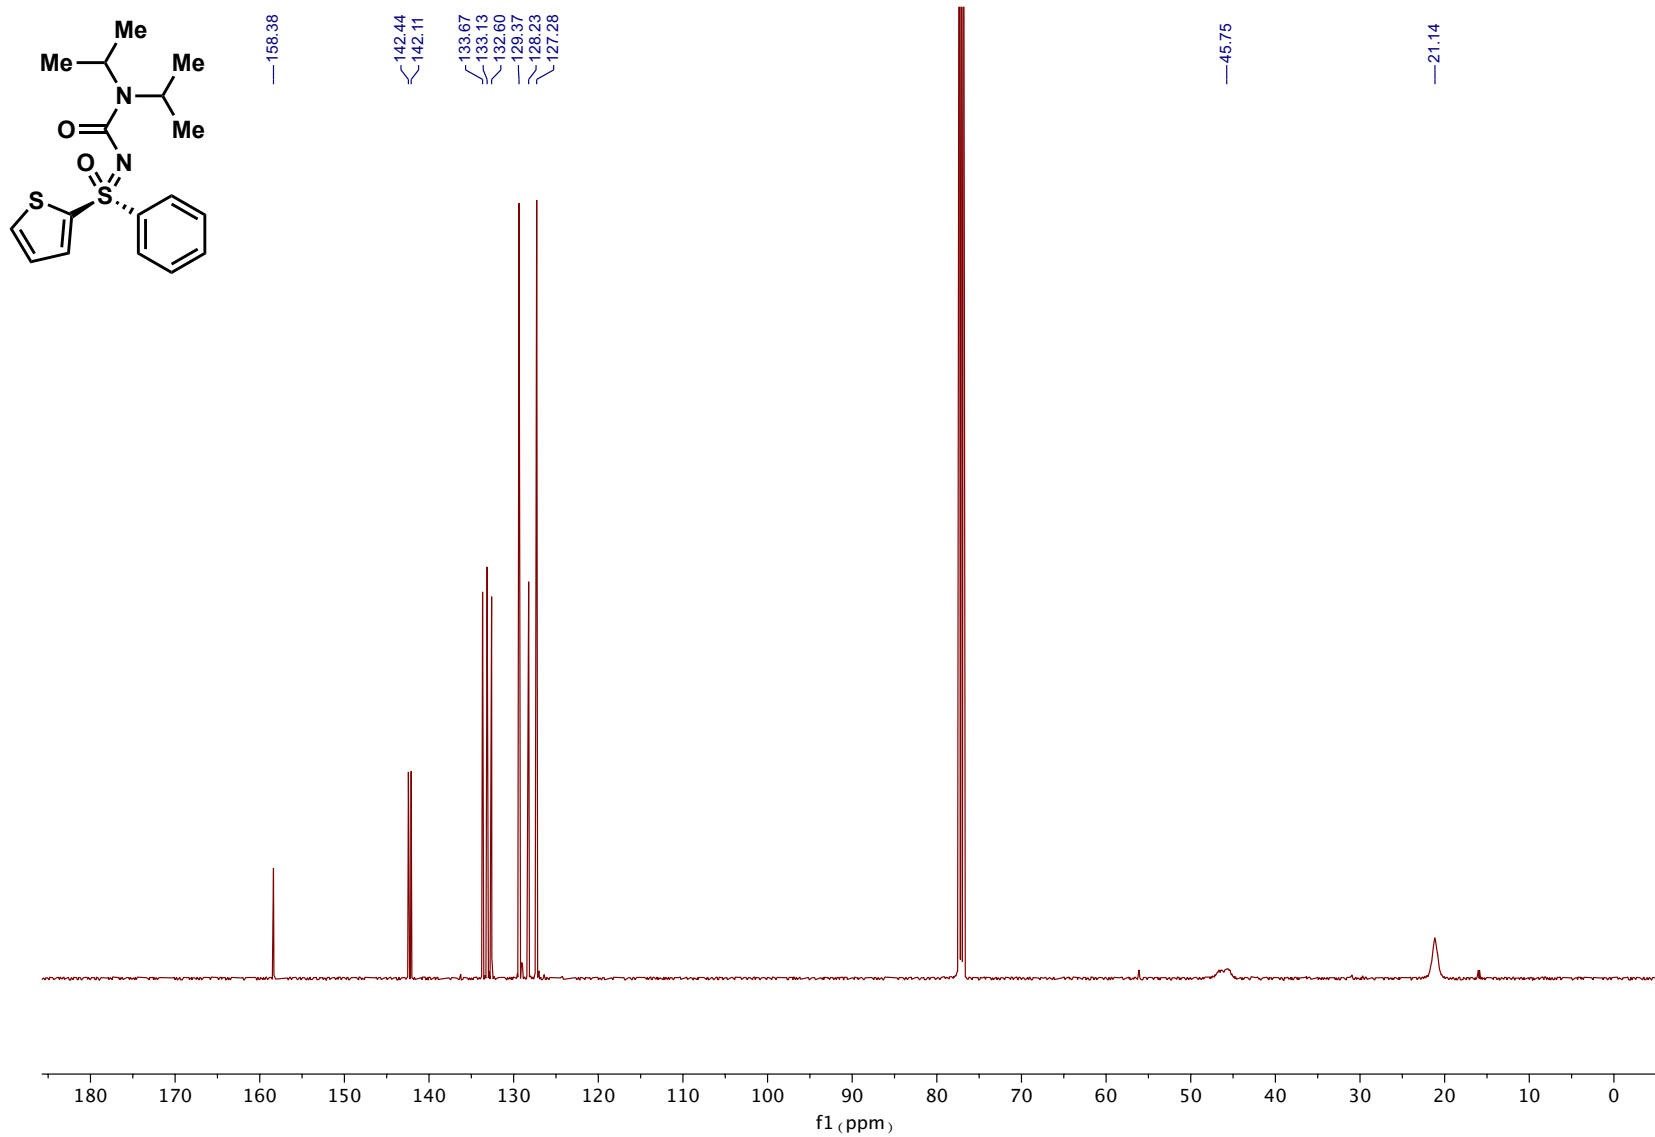

**<sup>1</sup>H NMR of compound 7g:**

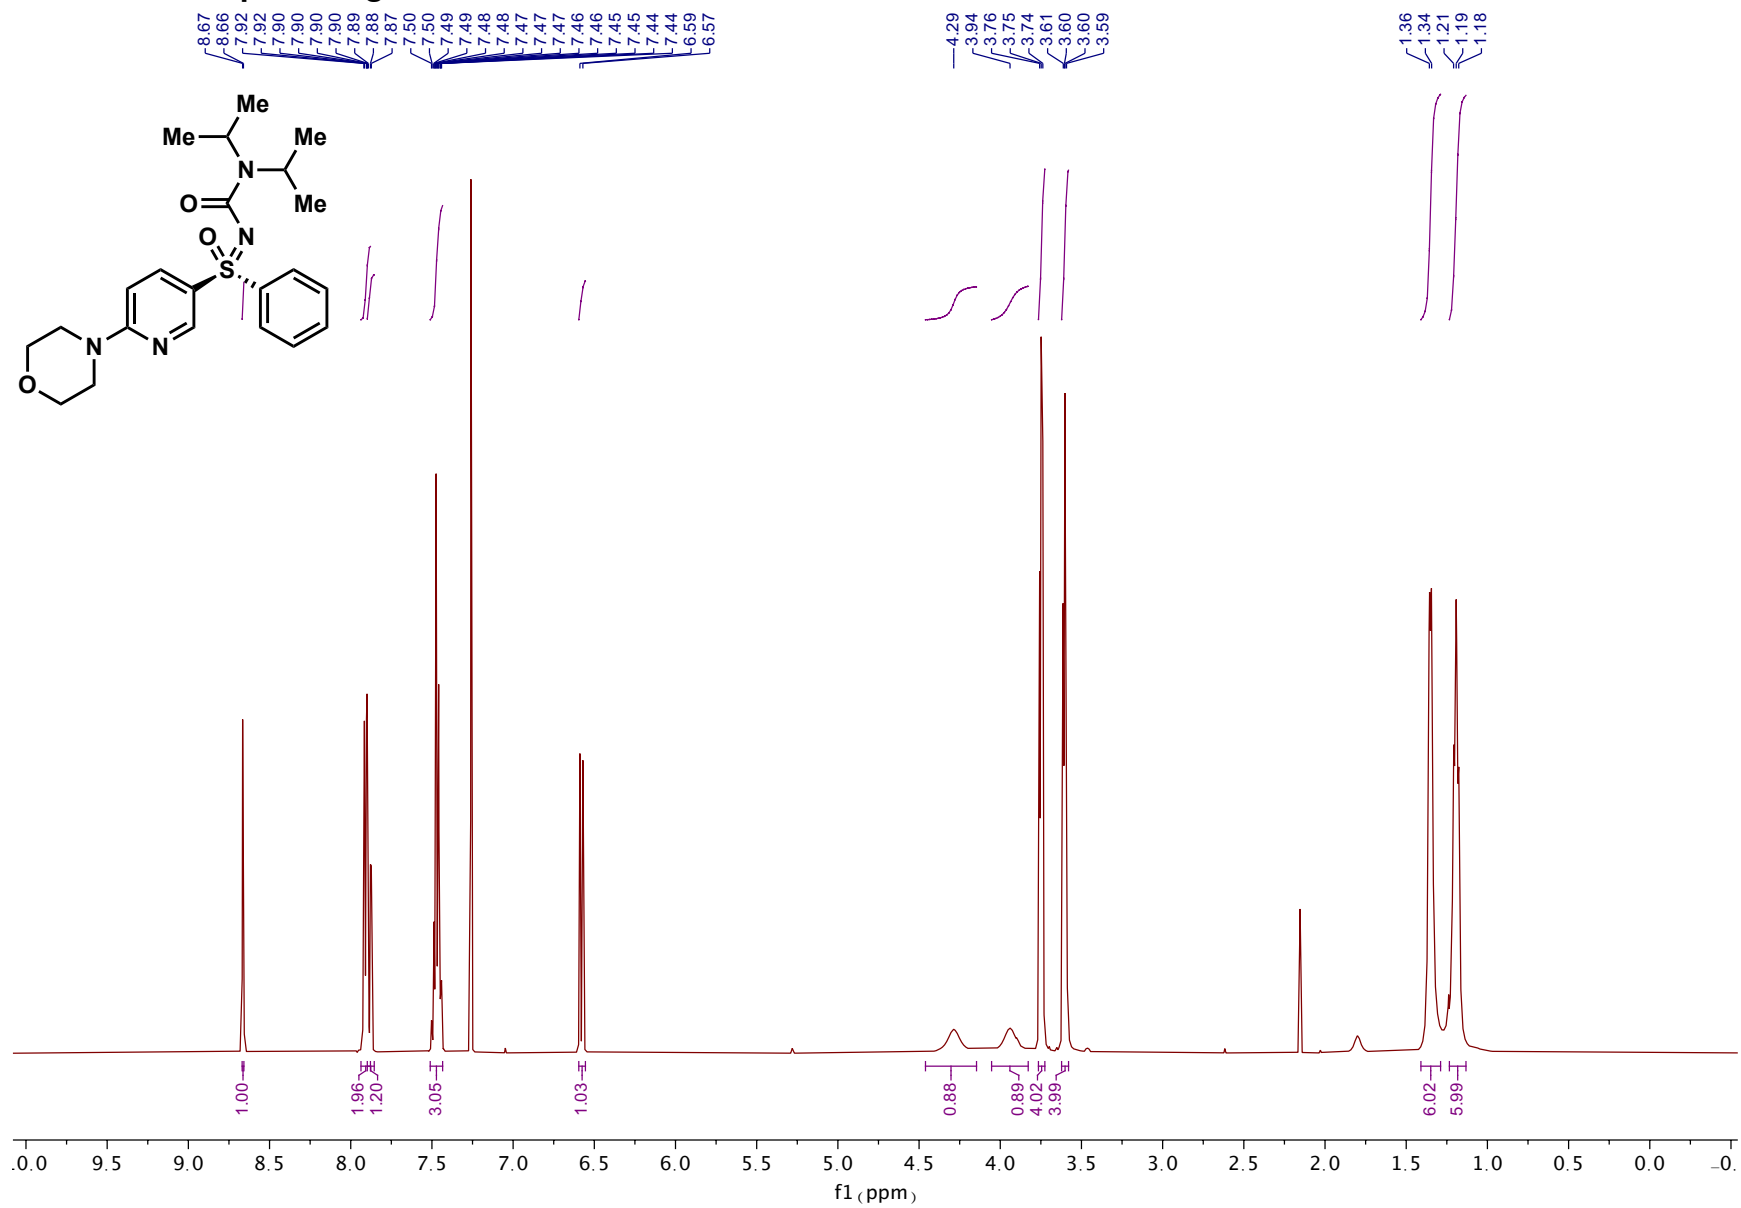

**<sup>13</sup>C NMR of compound 7g:**

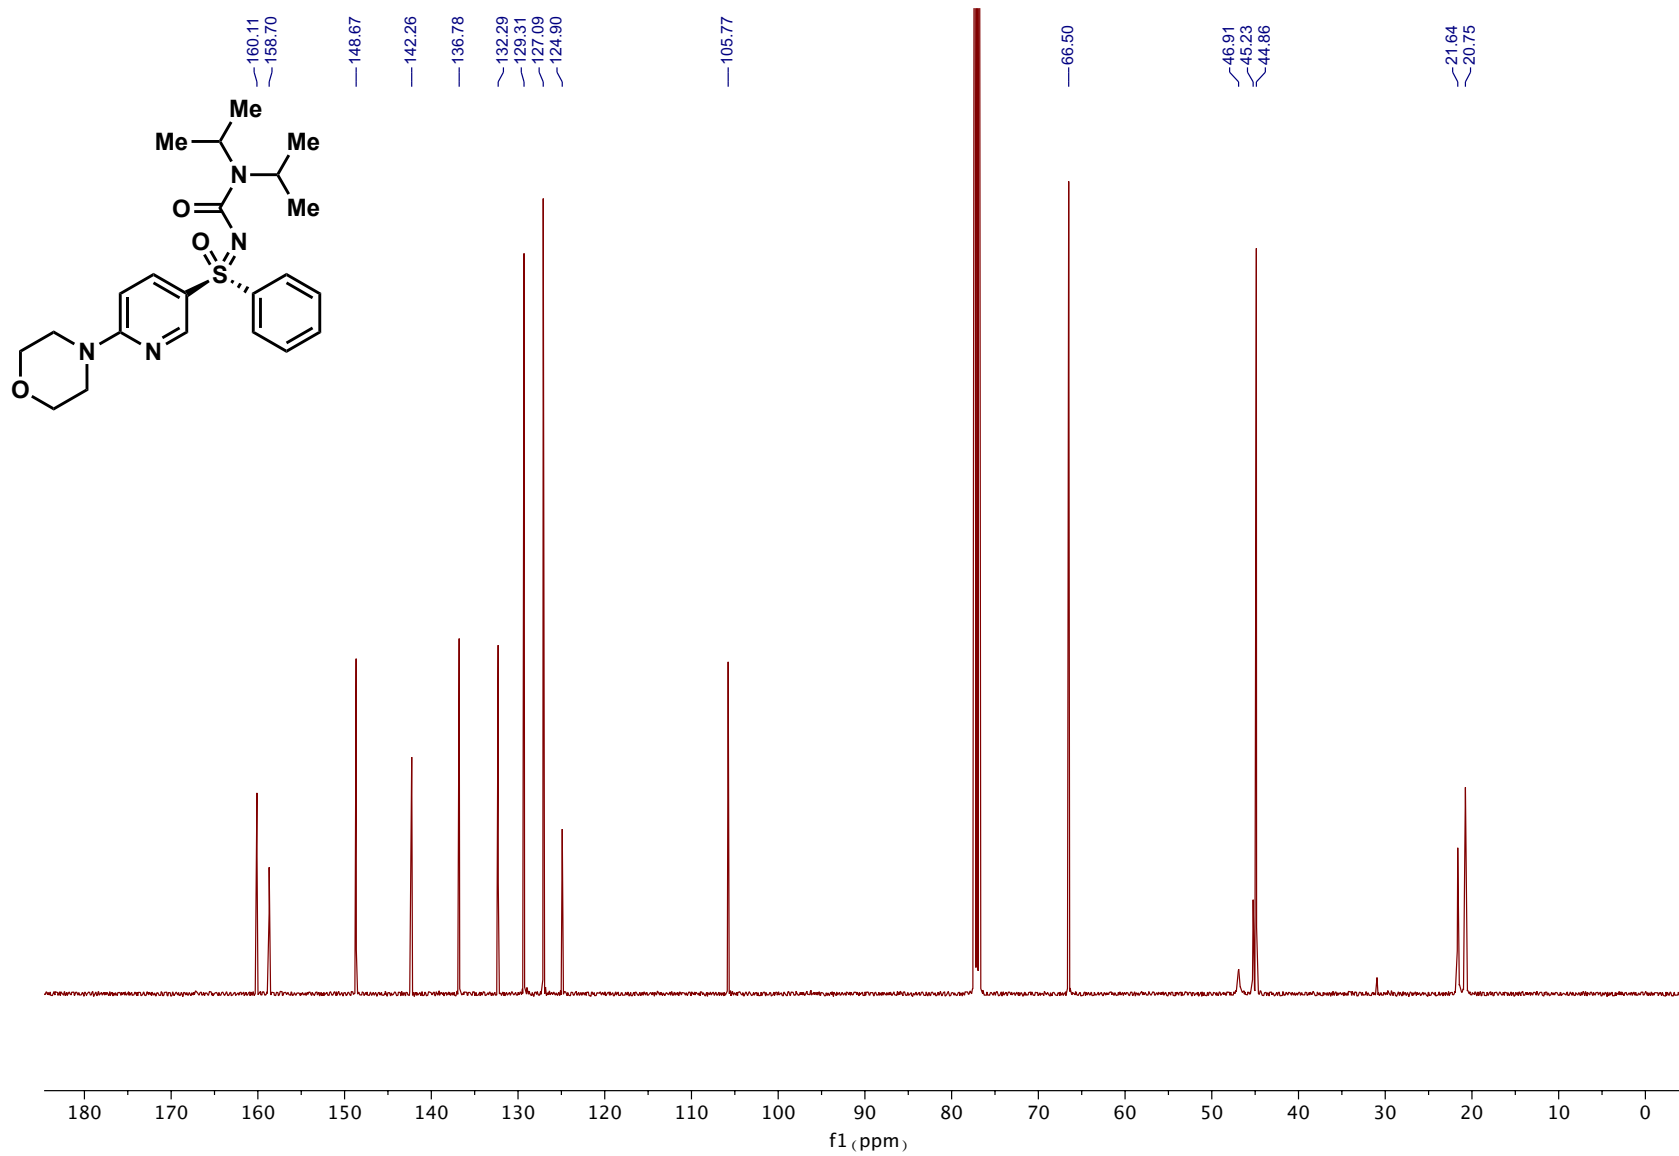

**<sup>1</sup>H NMR of compound 7h:**

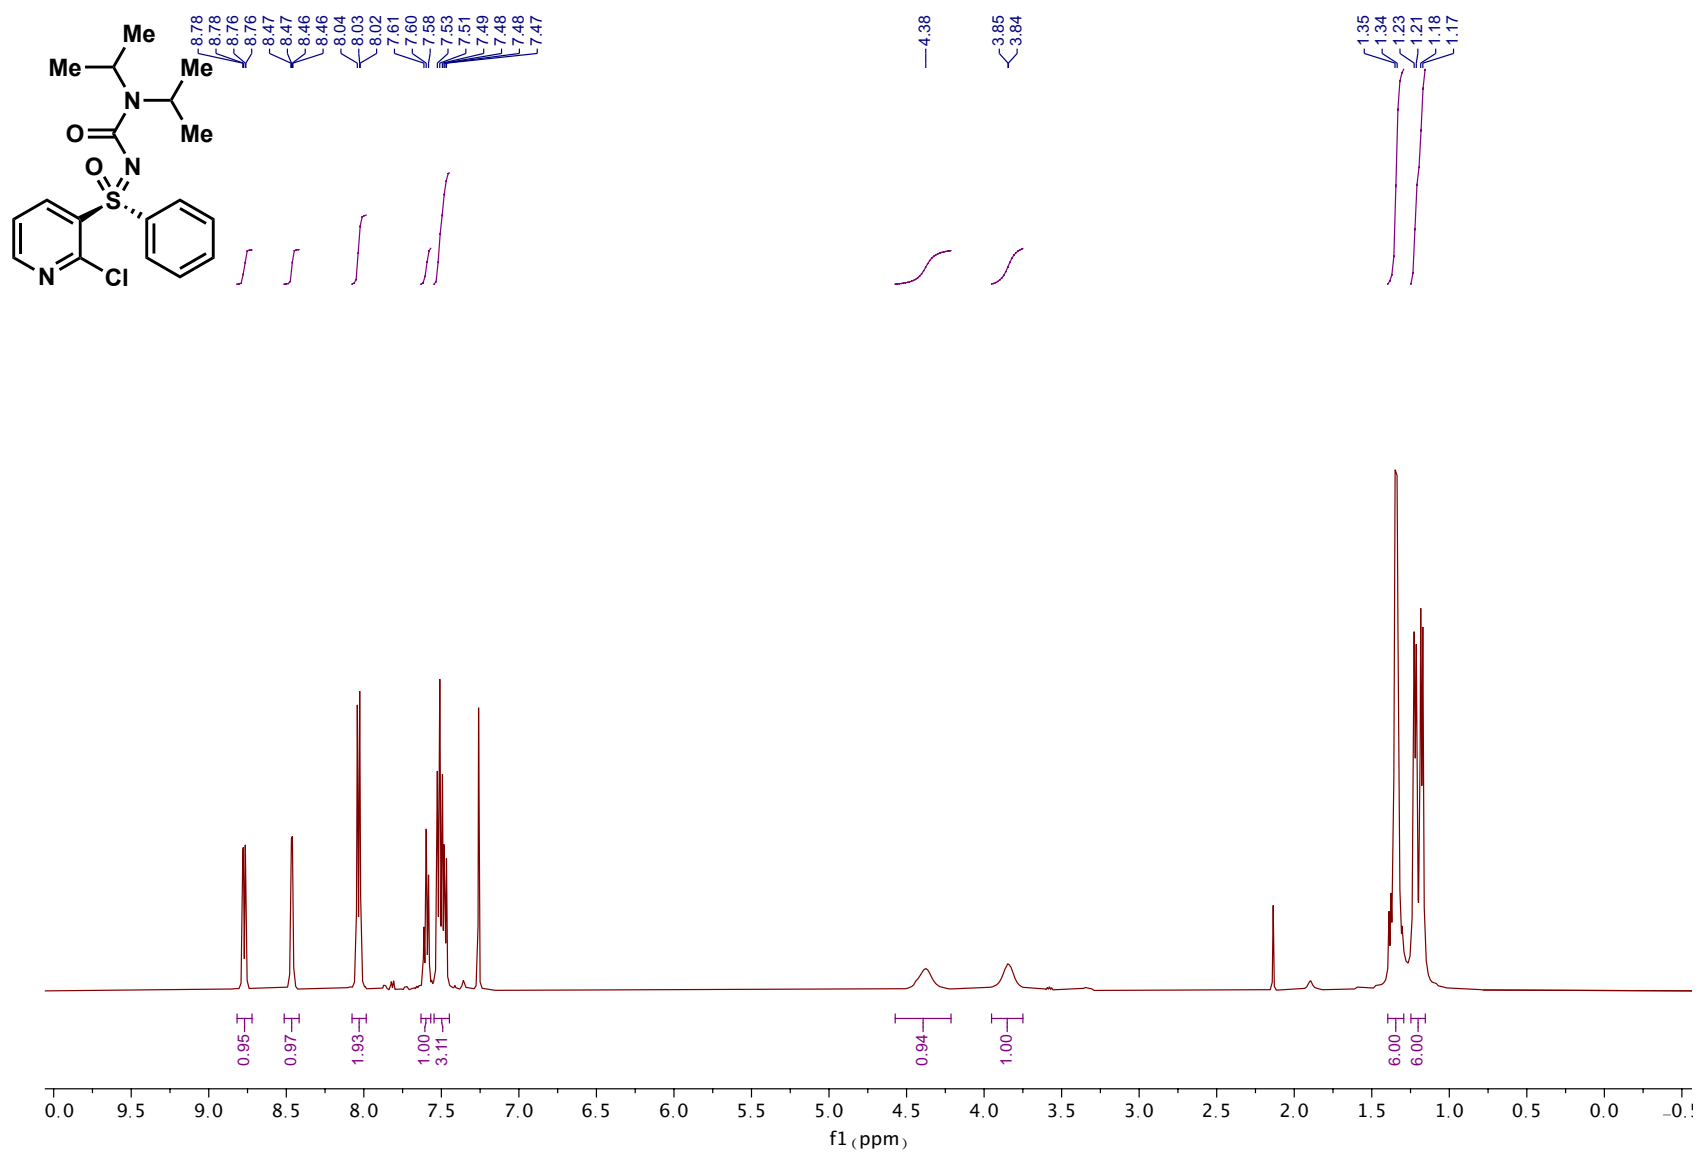

**<sup>13</sup>C NMR of compound 7h:**

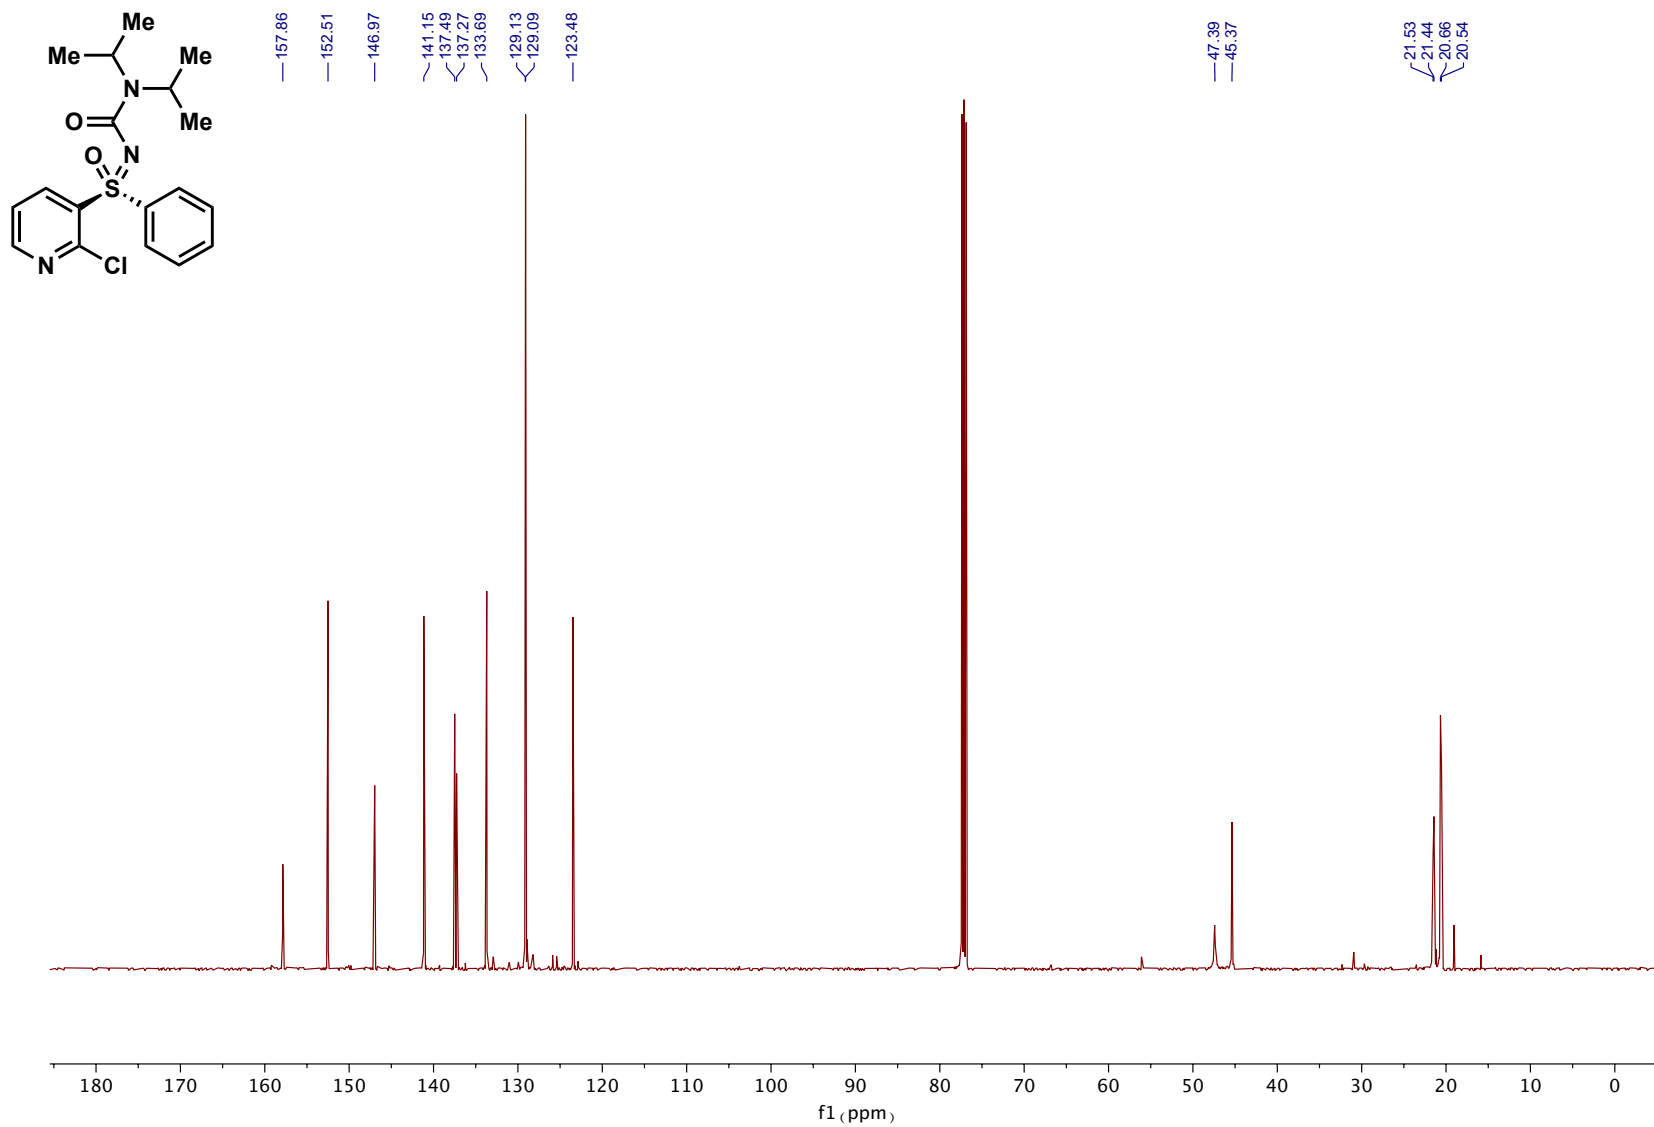

**<sup>1</sup>H NMR of compound 7i:**

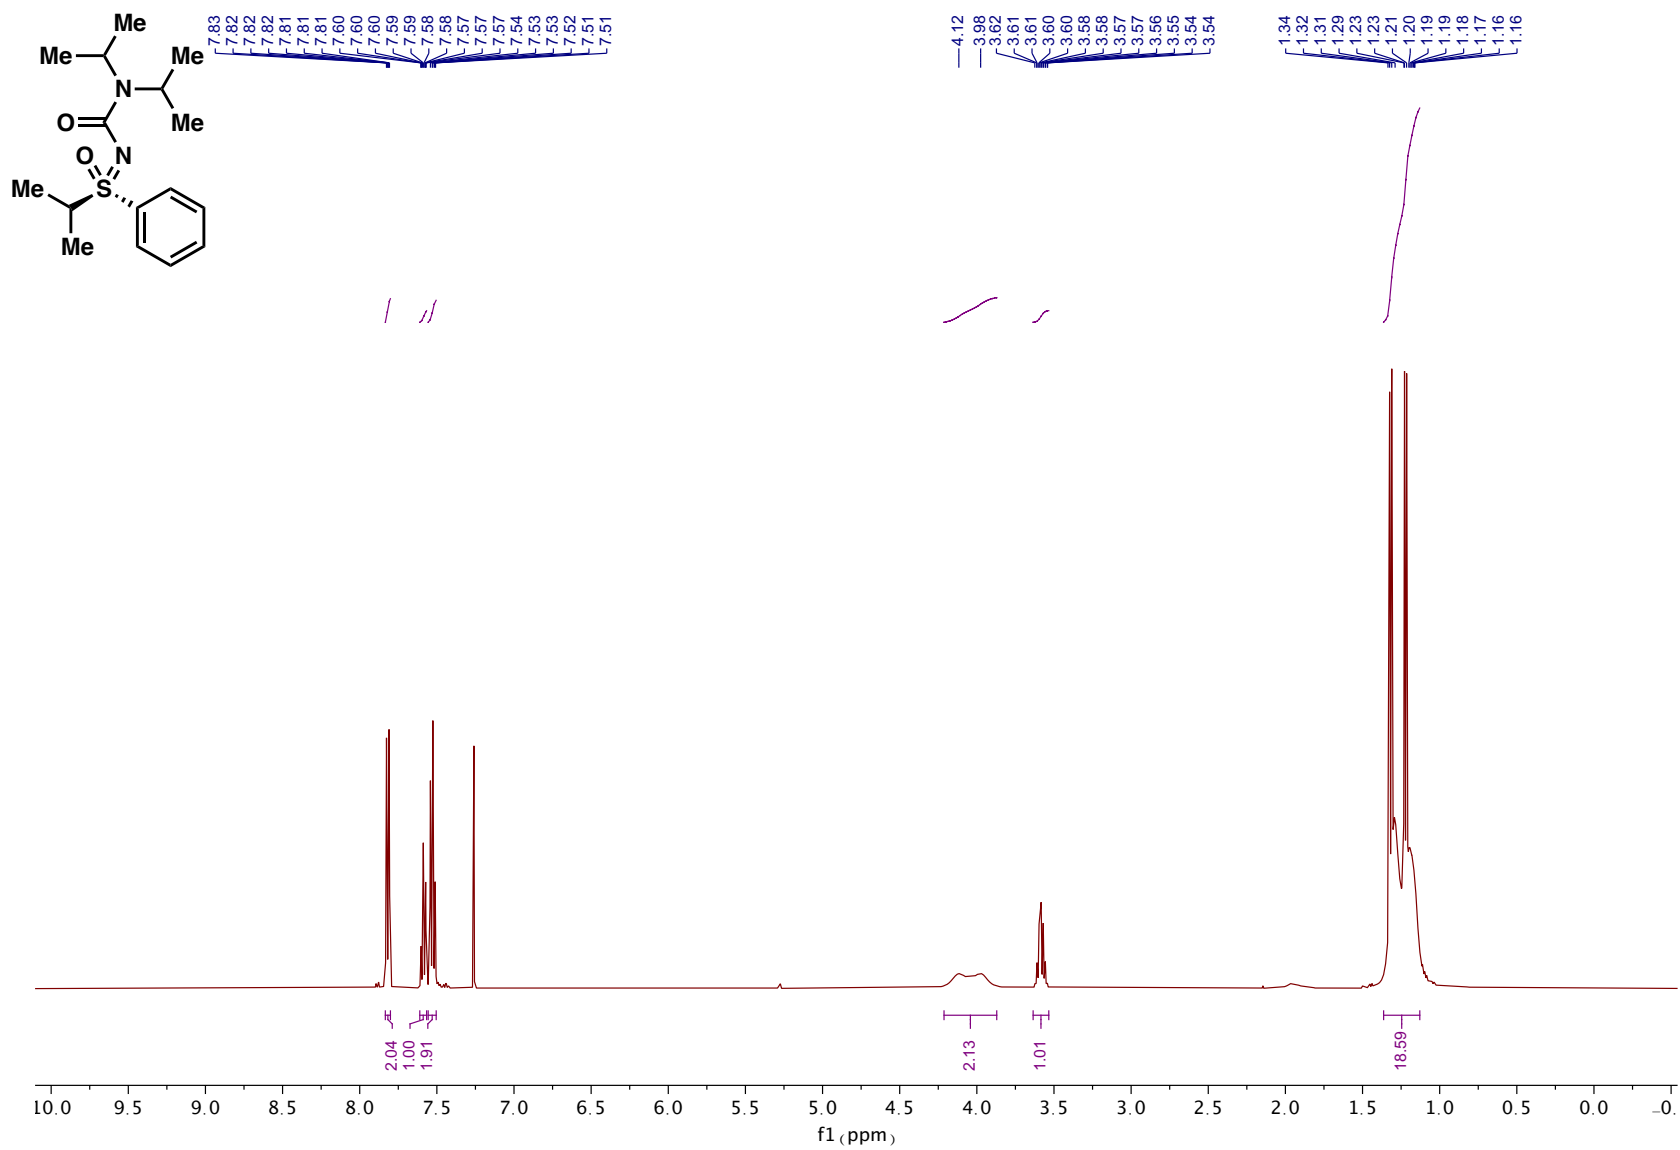

**$^{13}\text{C}$  NMR of compound 7i:**

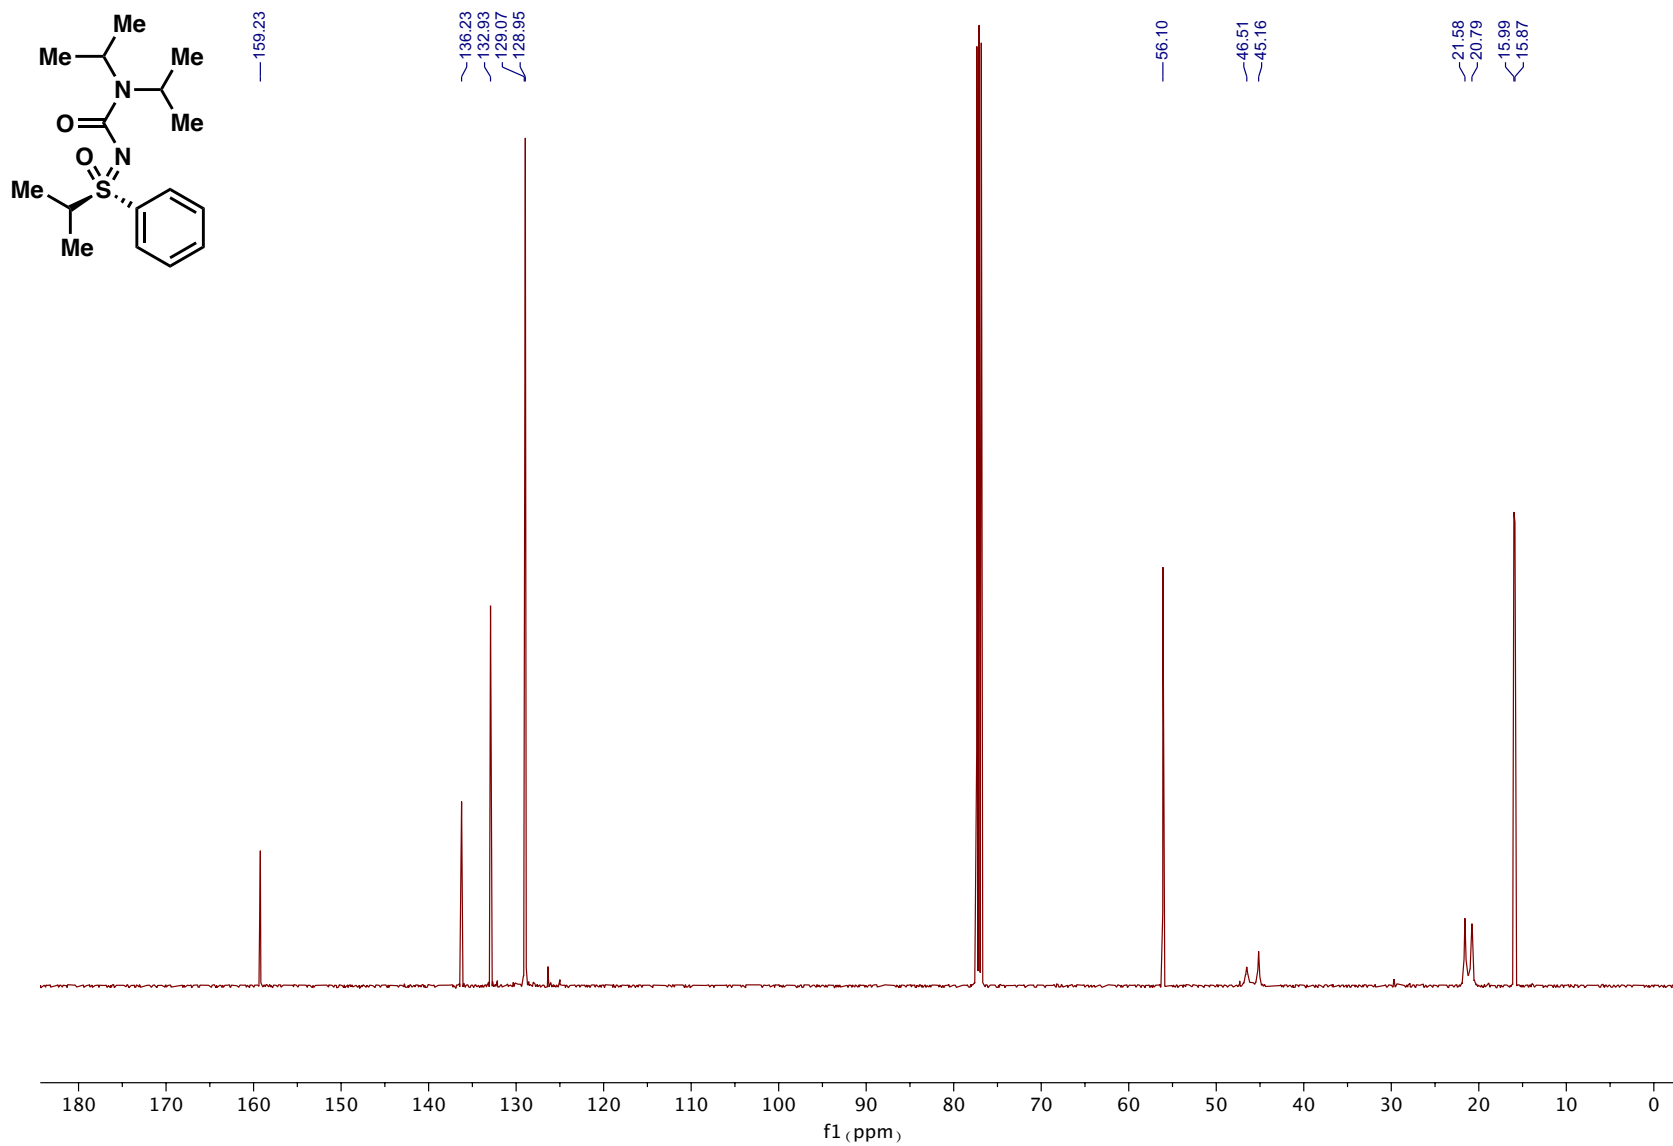

**<sup>1</sup>H NMR of compound 7j:**

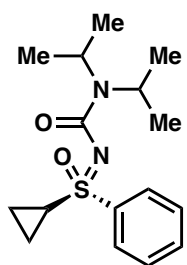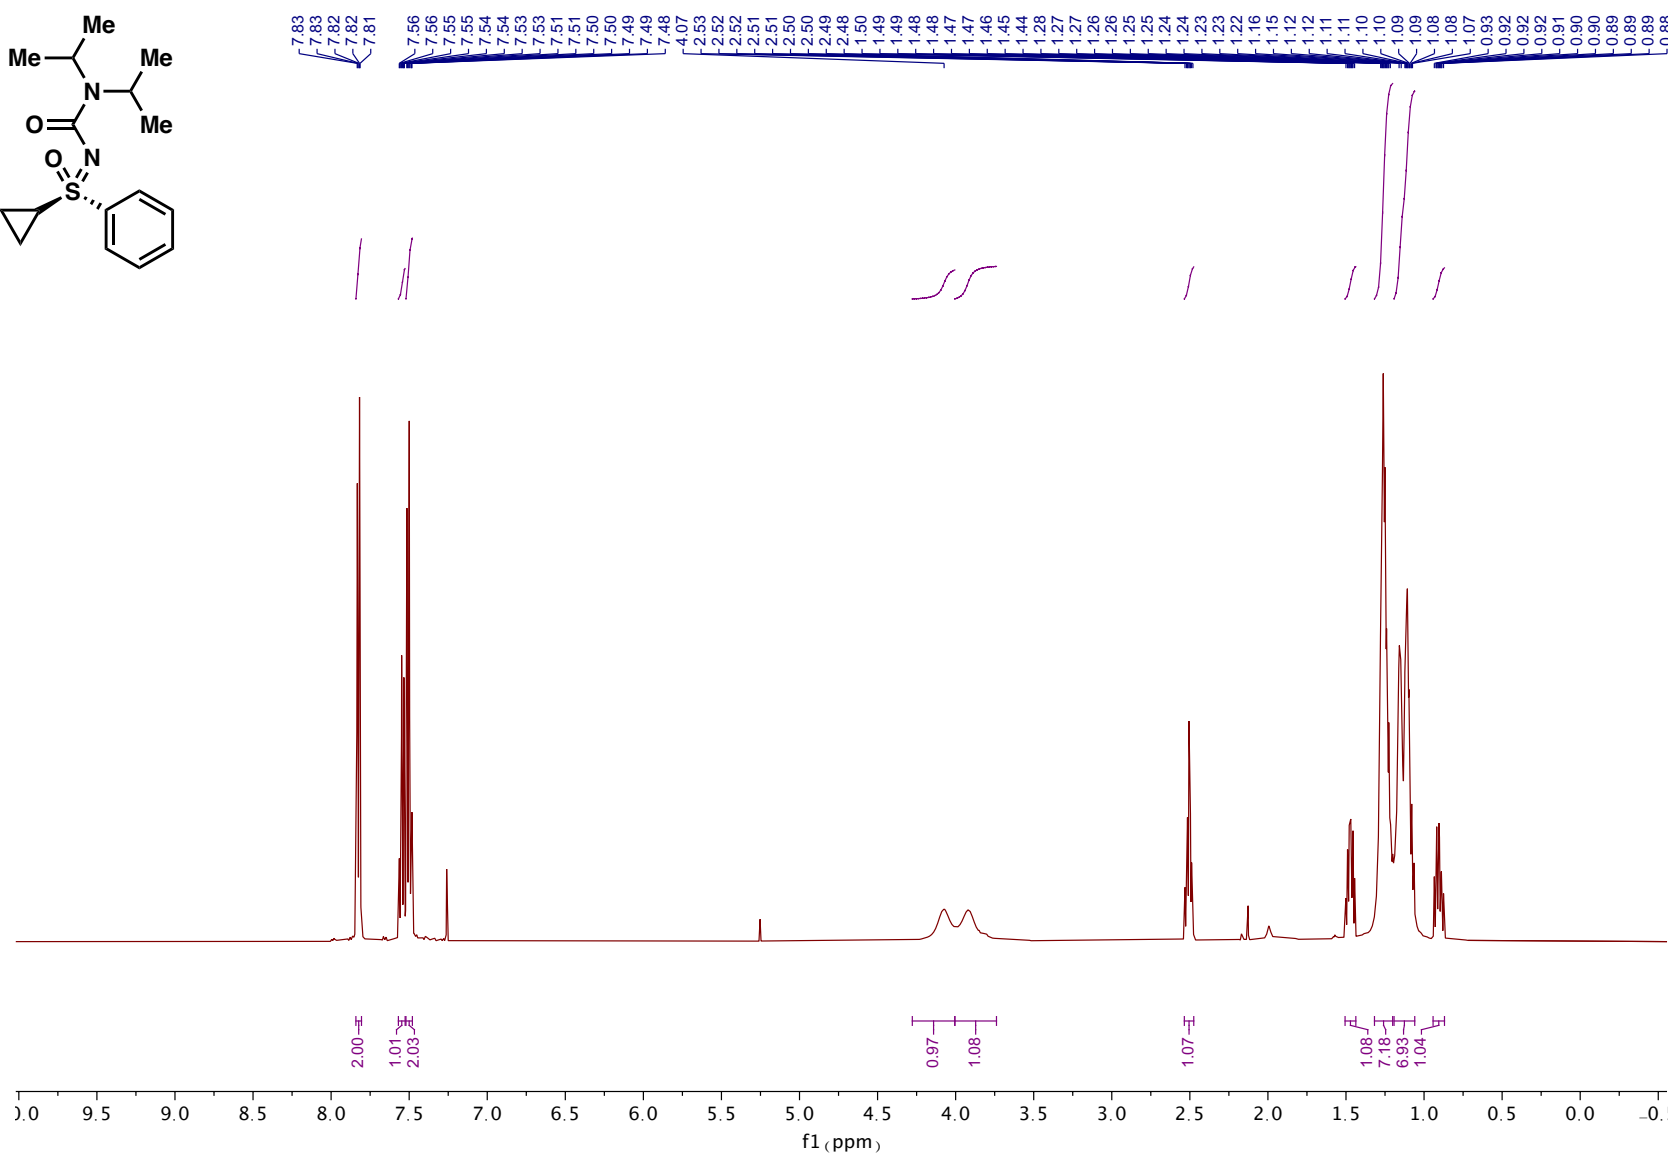

**<sup>13</sup>C NMR of compound 7j:**

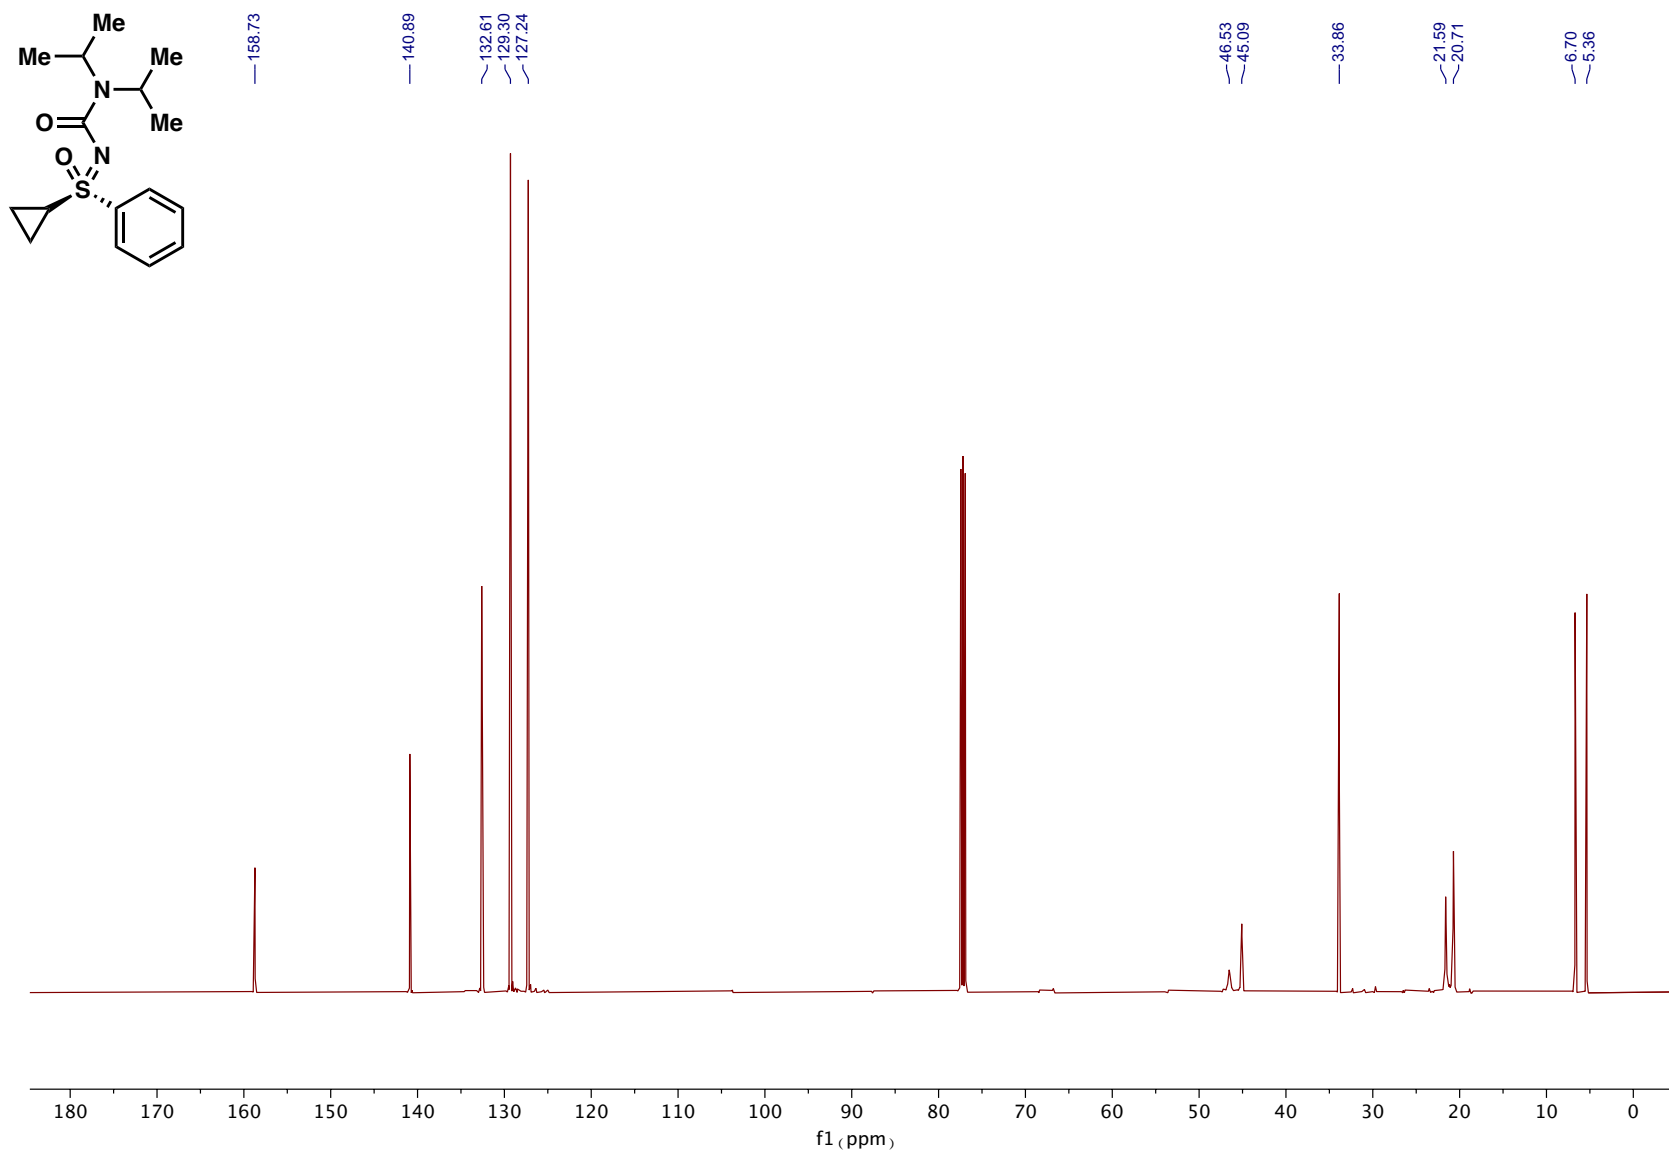

**<sup>1</sup>H NMR of compound 7k:**

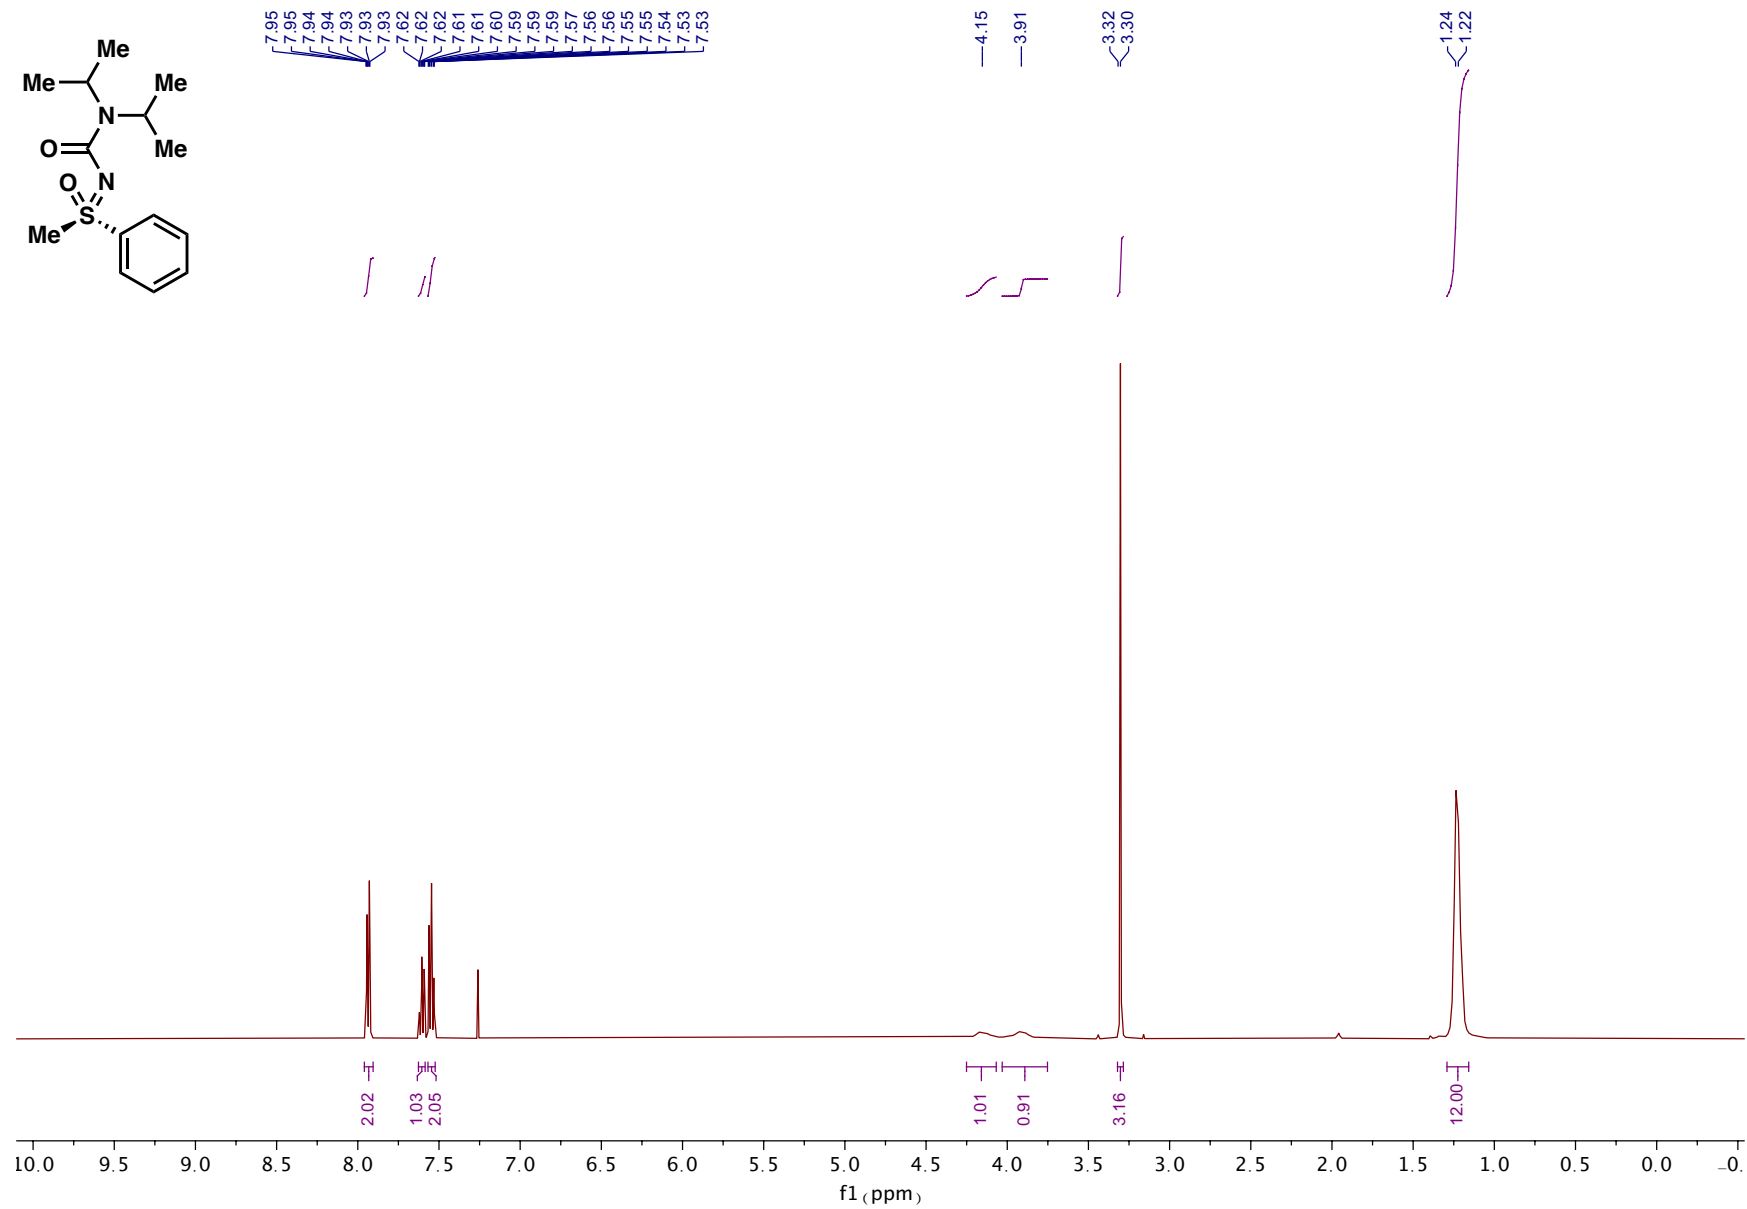

**$^{13}\text{C}$  NMR of compound 7k:**

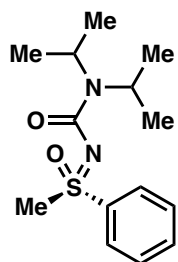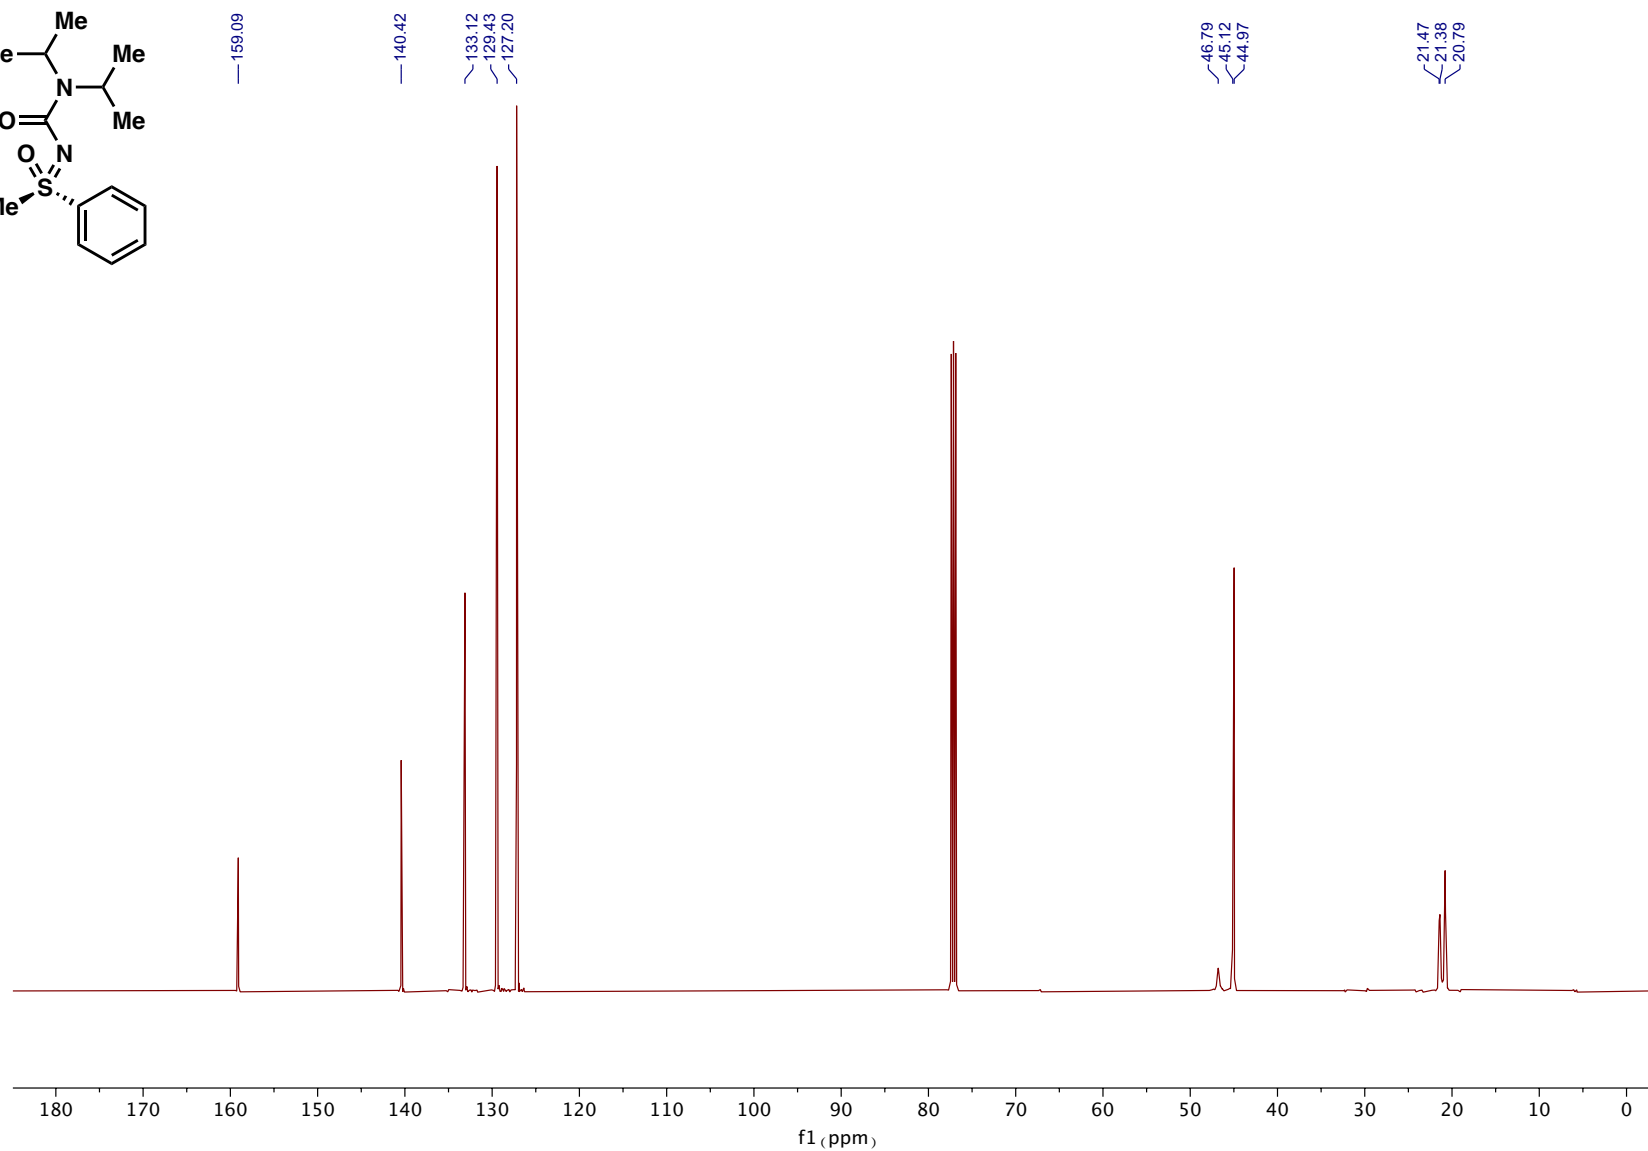

**<sup>1</sup>H NMR of compound 7I:**

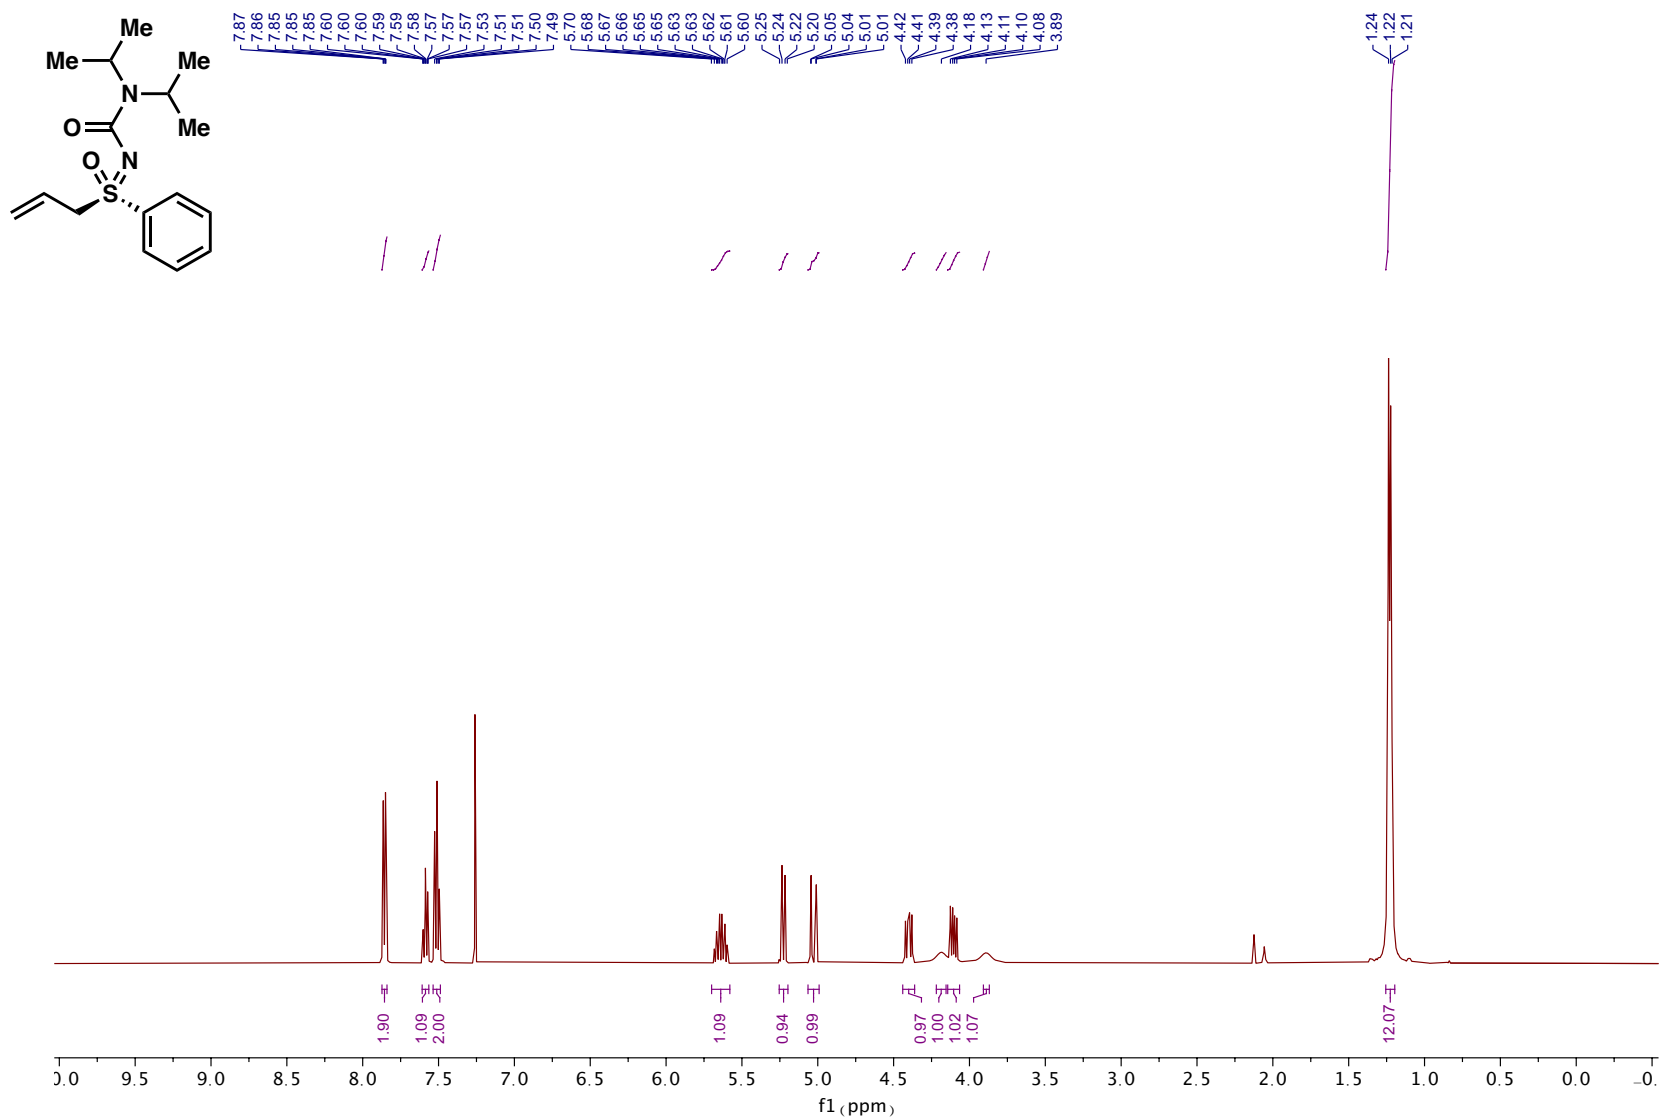

**$^{13}\text{C}$  NMR of compound 7l:**

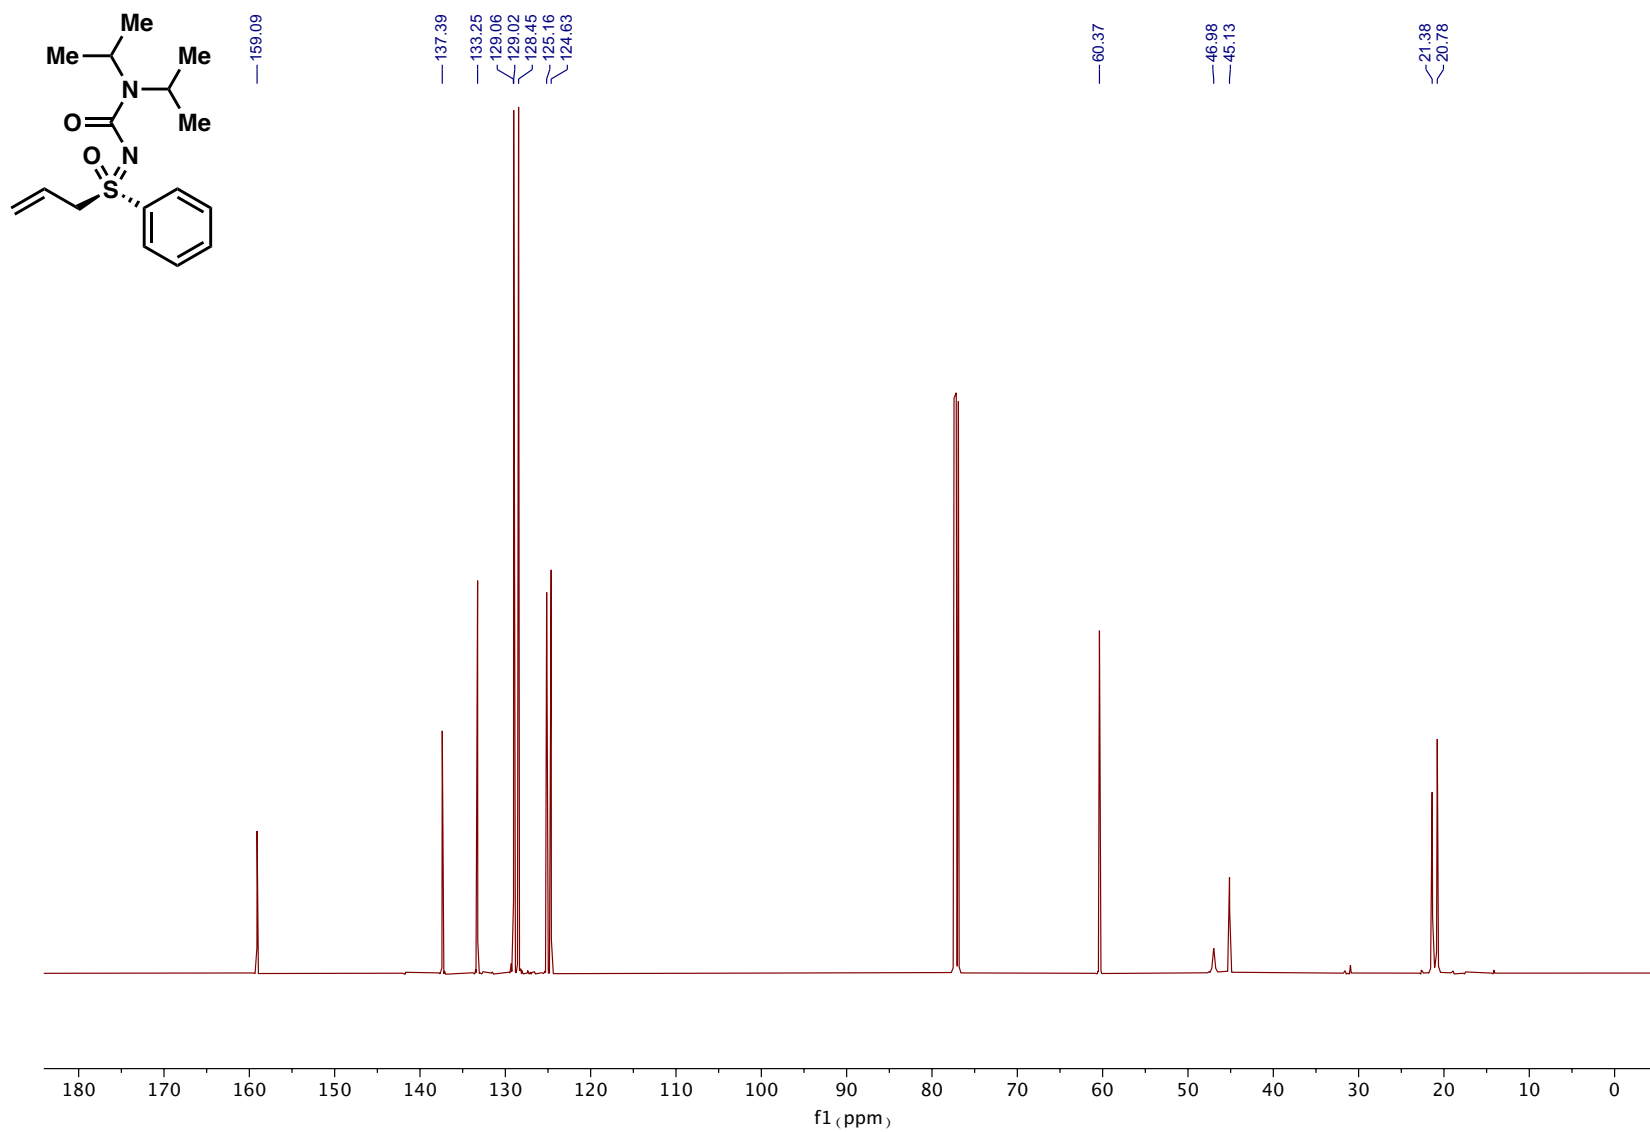

**<sup>1</sup>H NMR of compound 8a:**

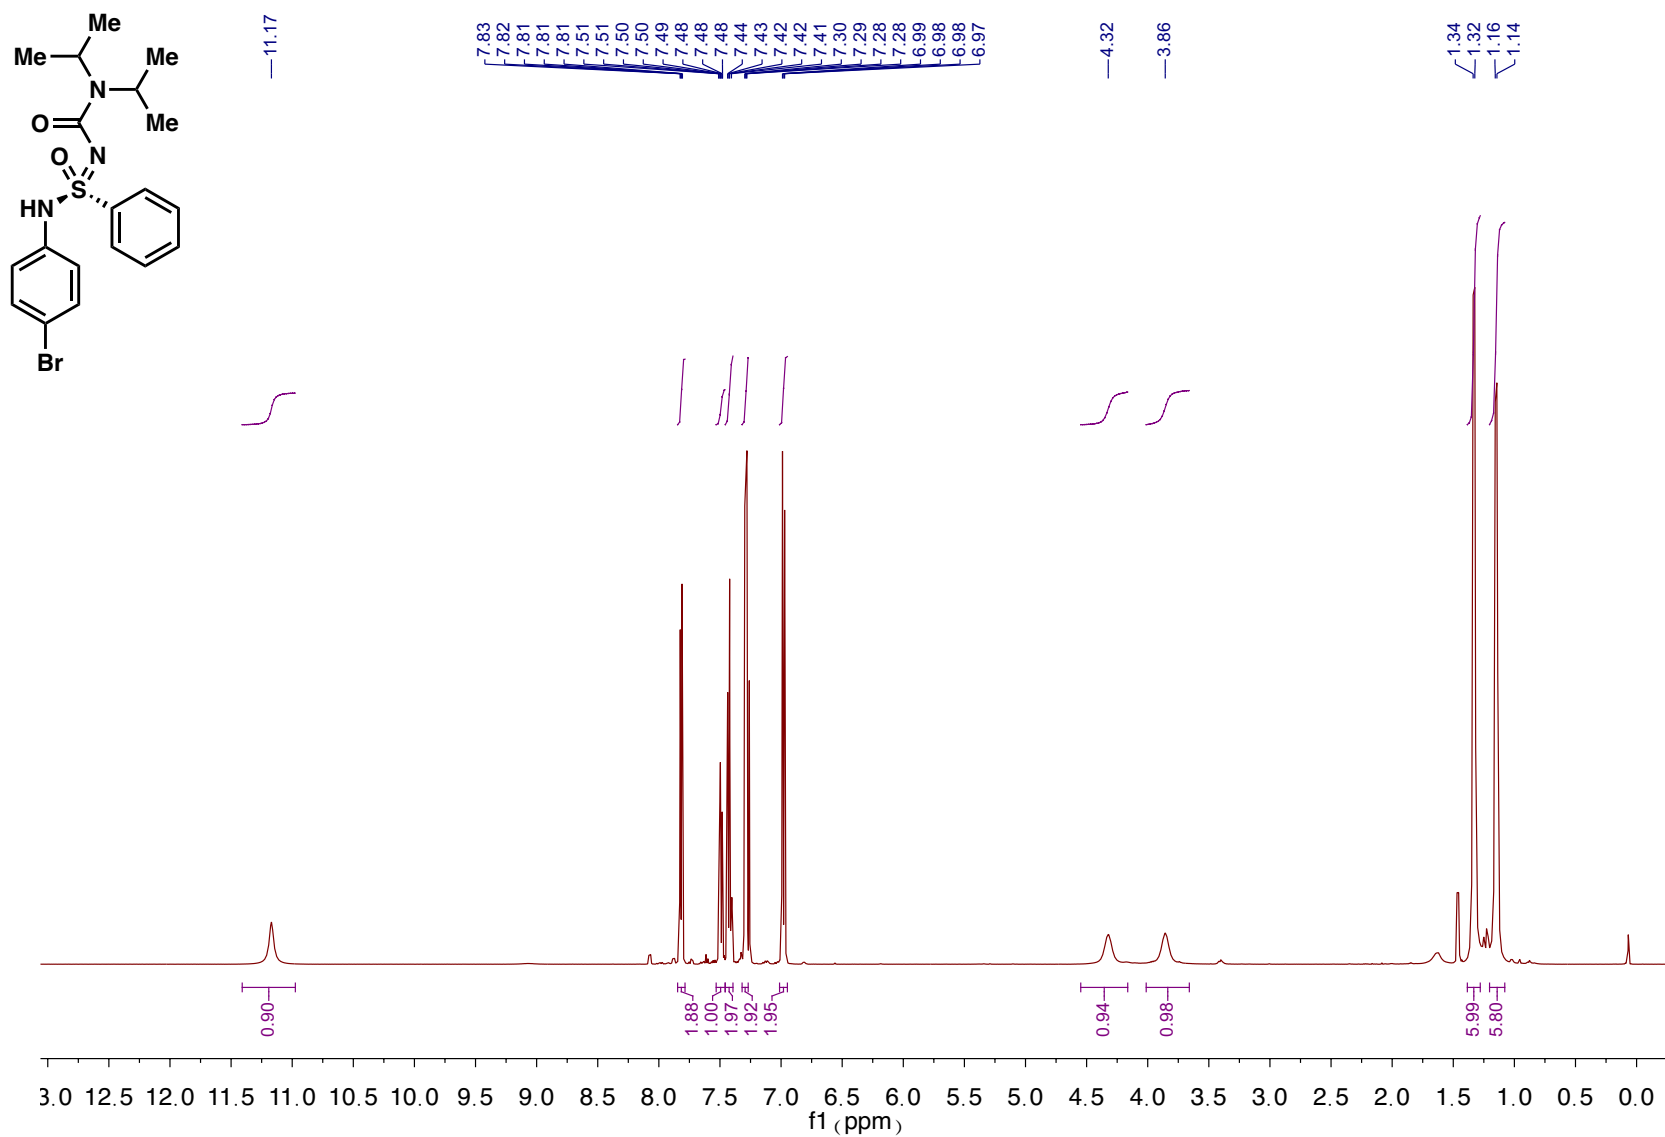

**$^{13}\text{C}$  NMR of compound 8a:**

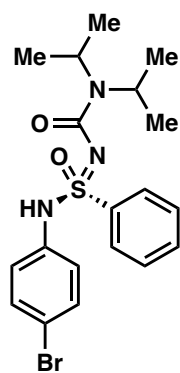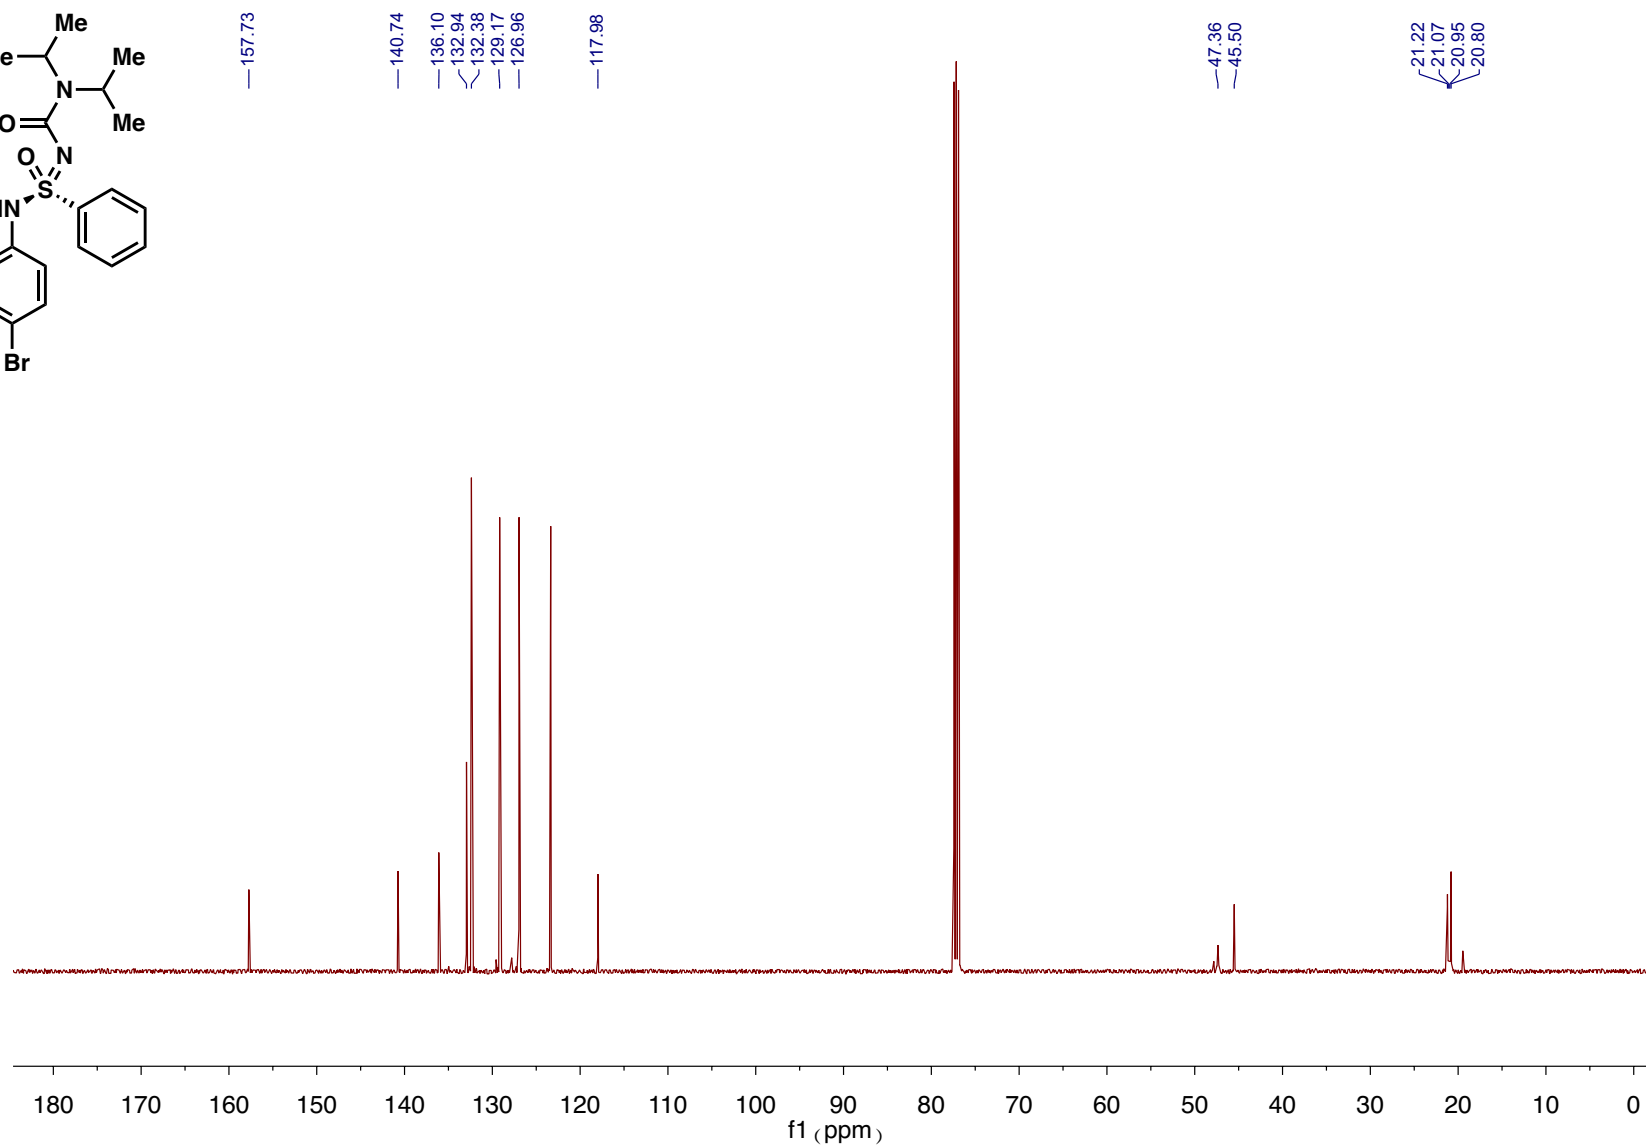

**<sup>1</sup>H NMR of compound 8b:**

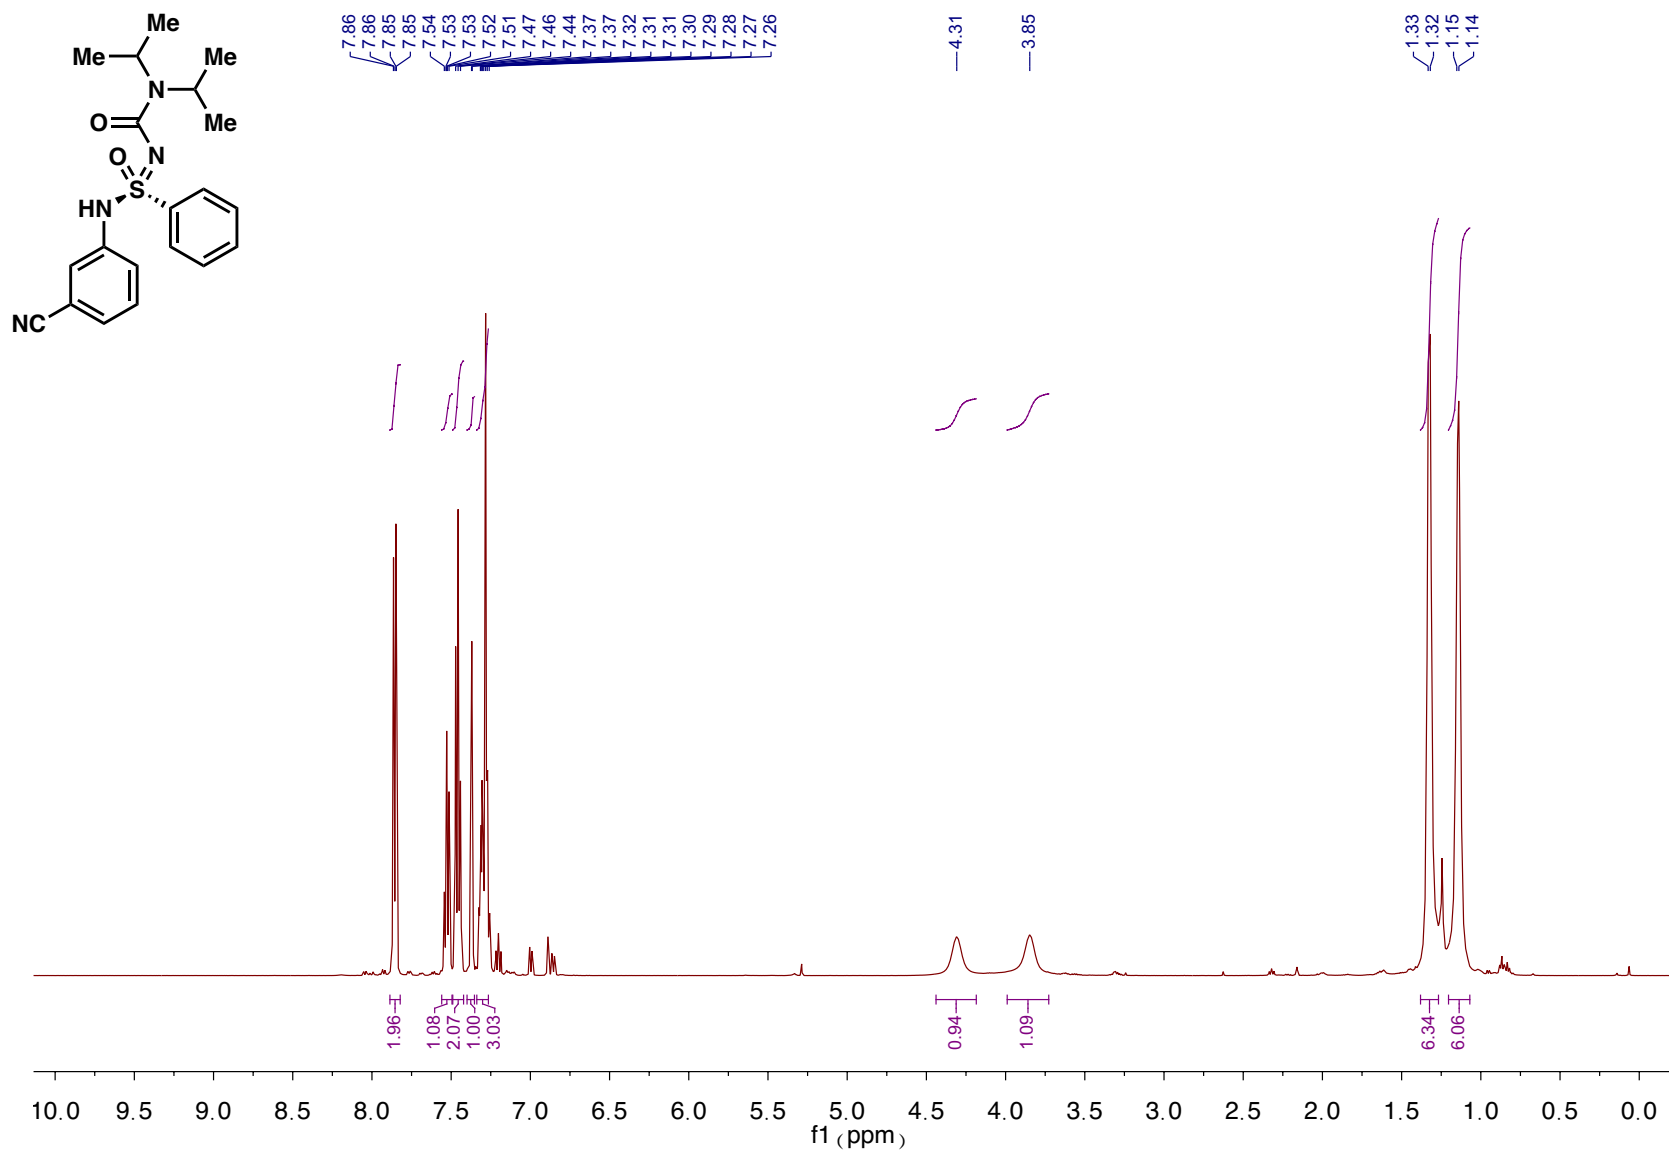

**$^{13}\text{C}$  NMR of compound 8b:**

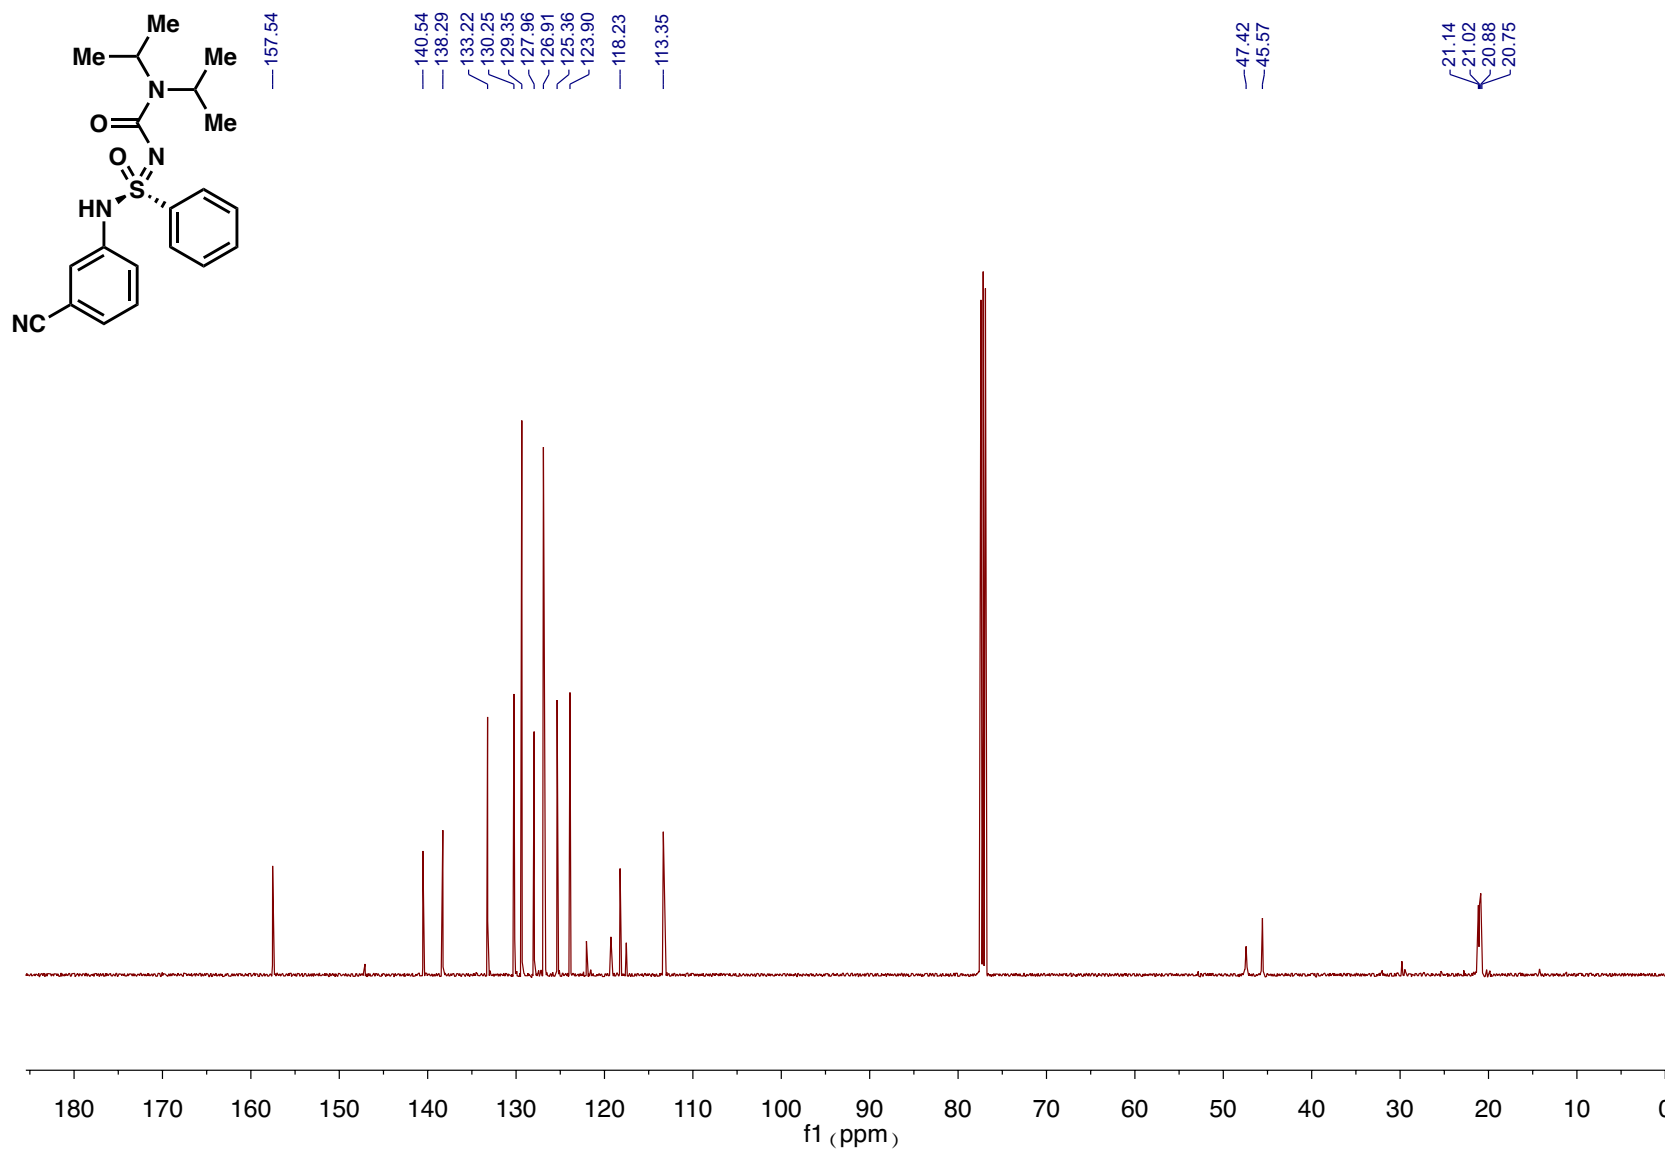

**<sup>1</sup>H NMR of compound 8c:**

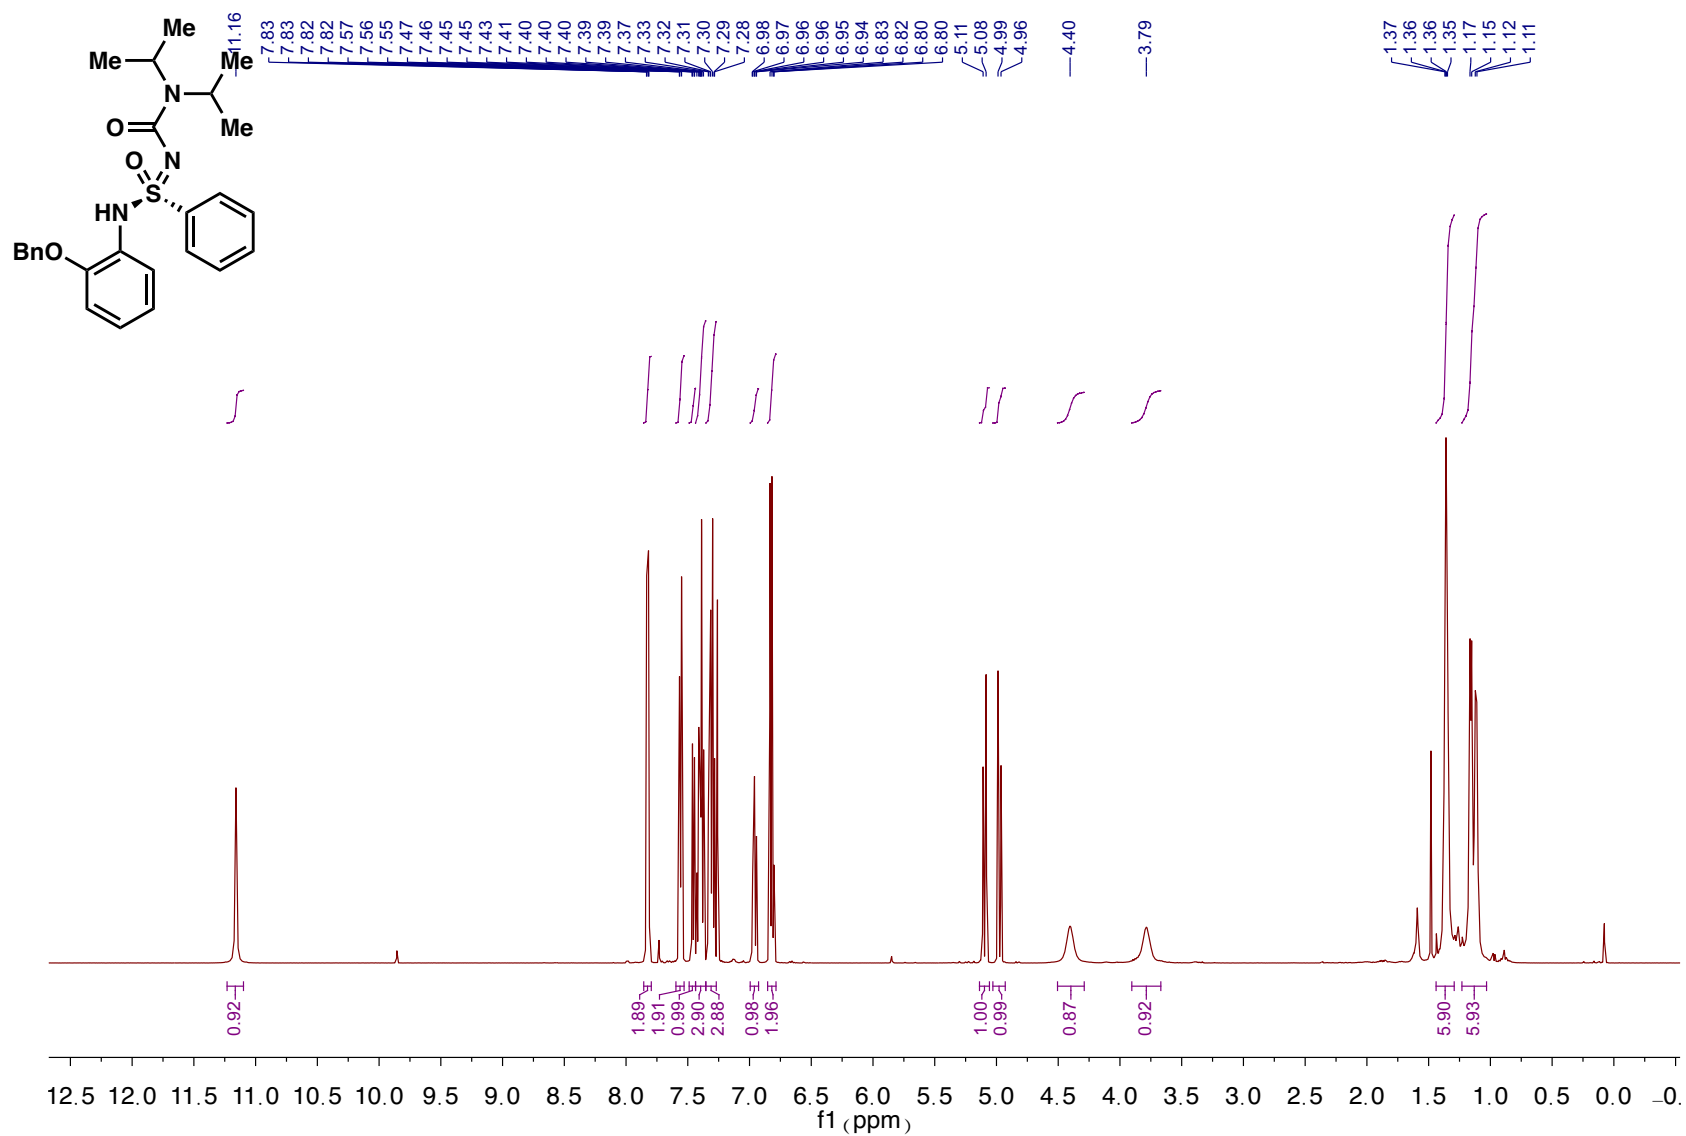

**$^{13}\text{C}$  NMR of compound 8c:**

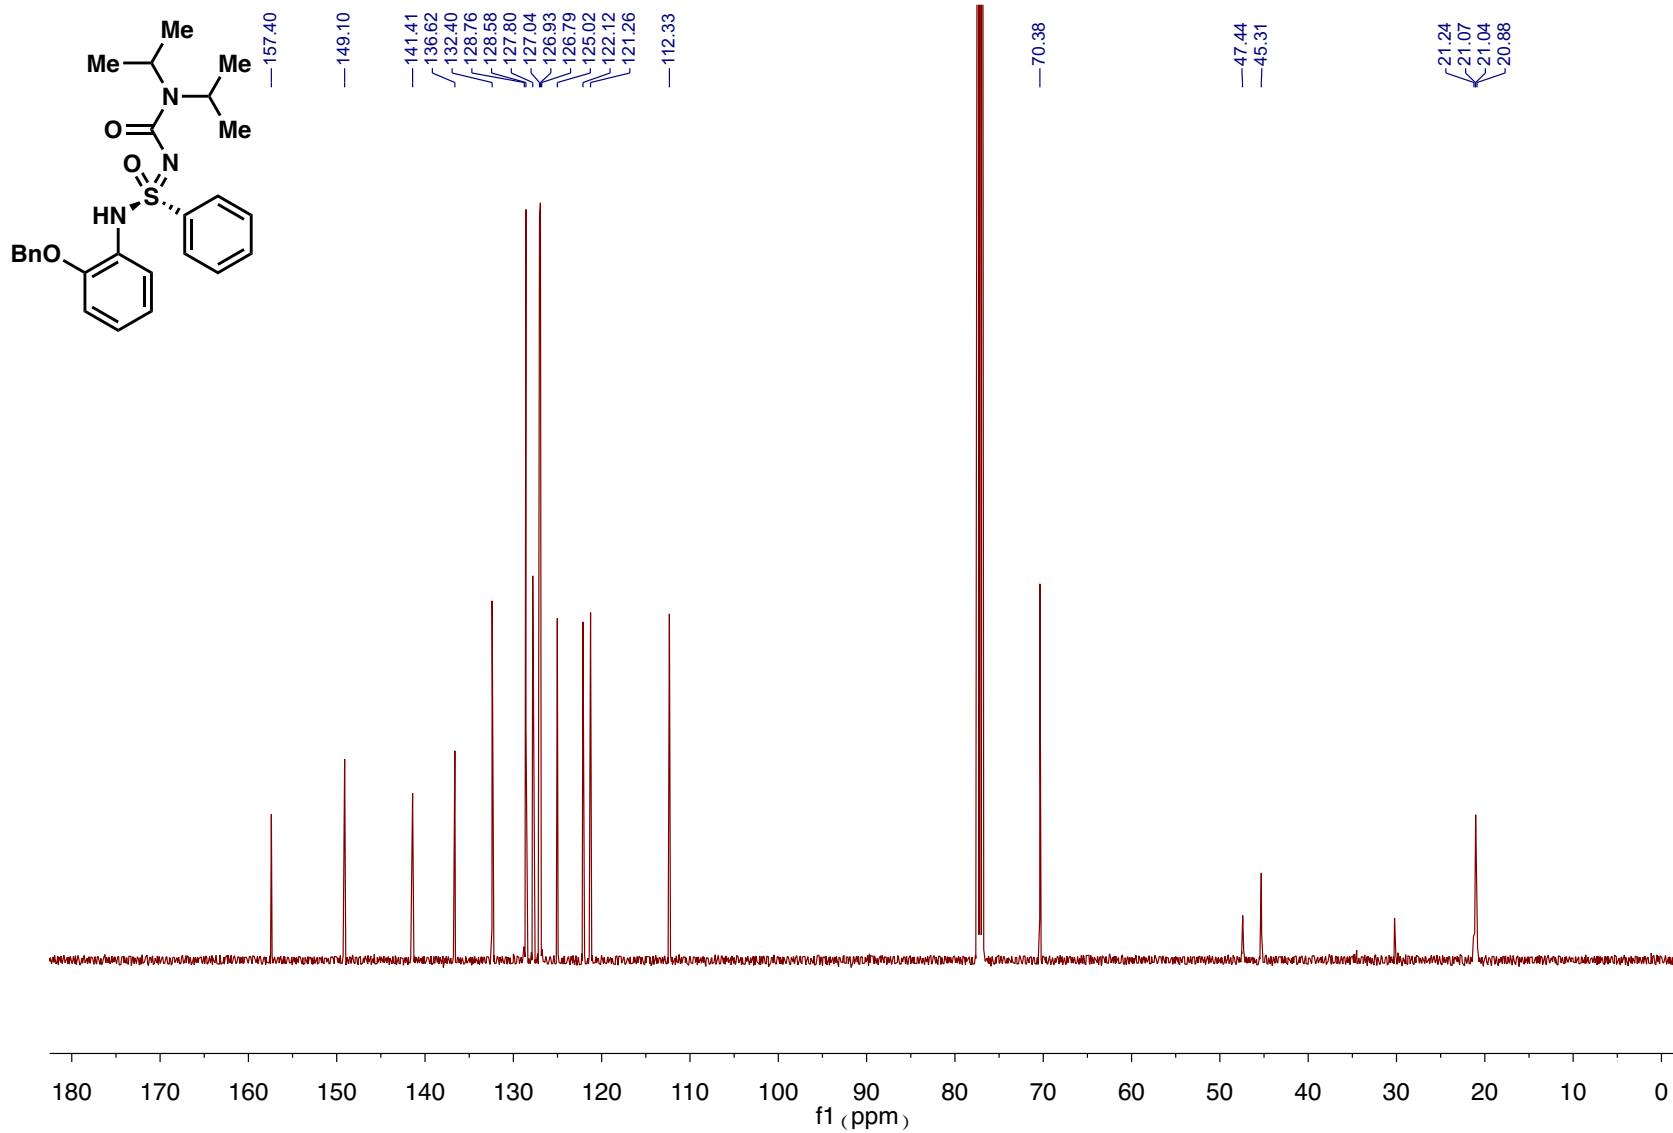

**<sup>1</sup>H NMR of compound 8d:**

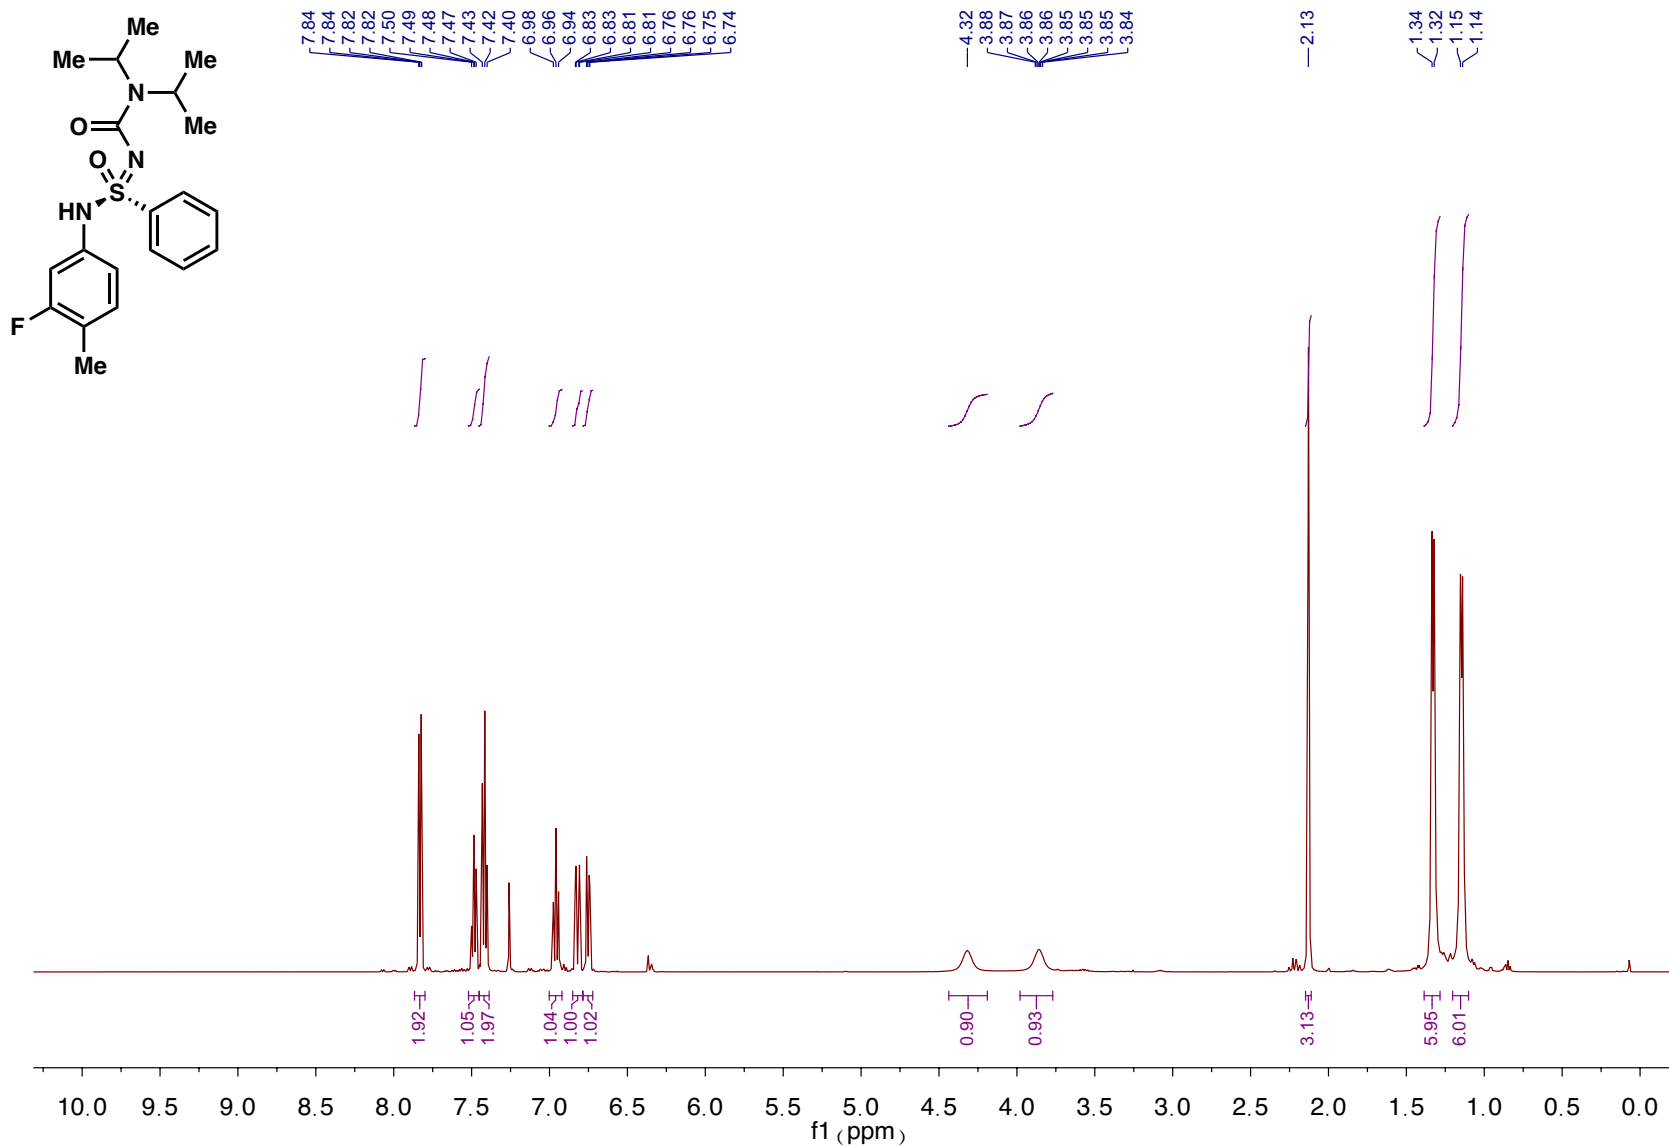

**$^{13}\text{C}$  NMR of compound 8d:**

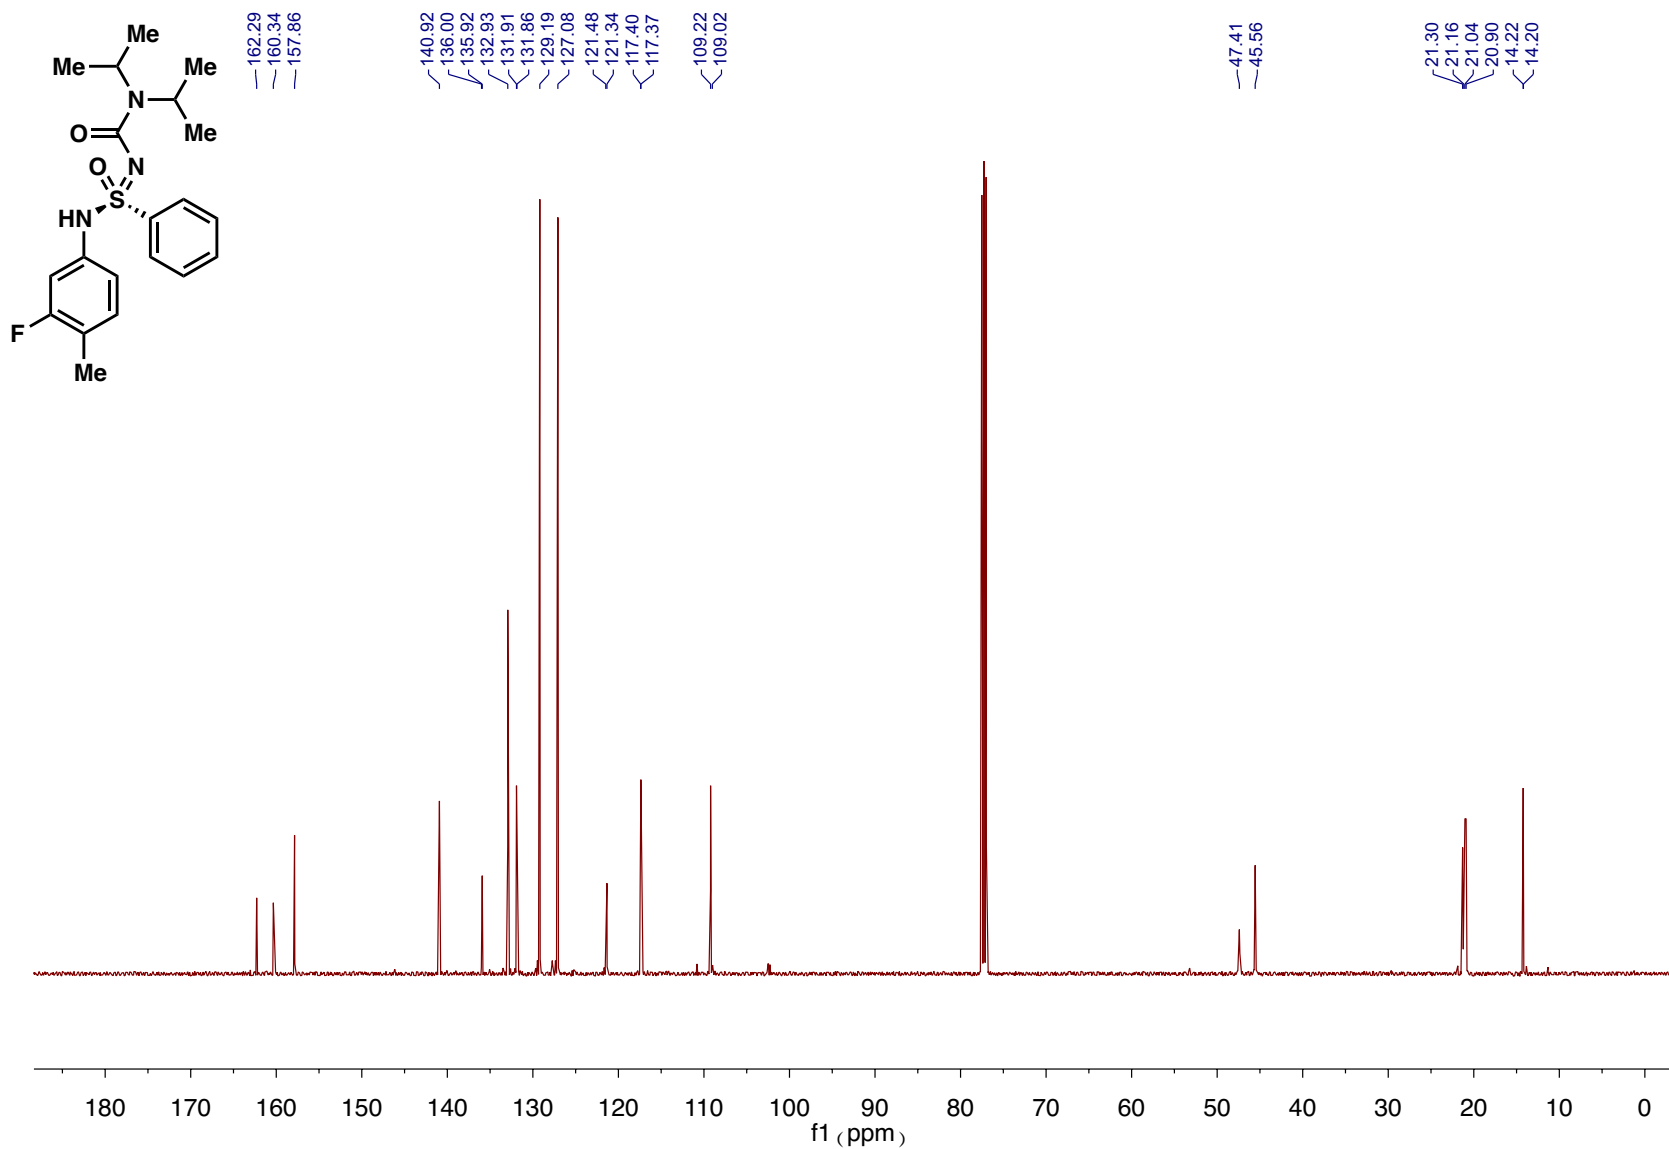

**$^{19}\text{F}$  NMR of compound 8d:**

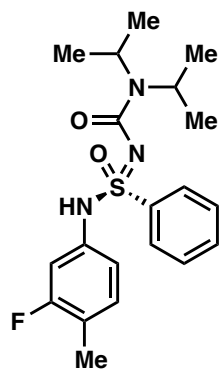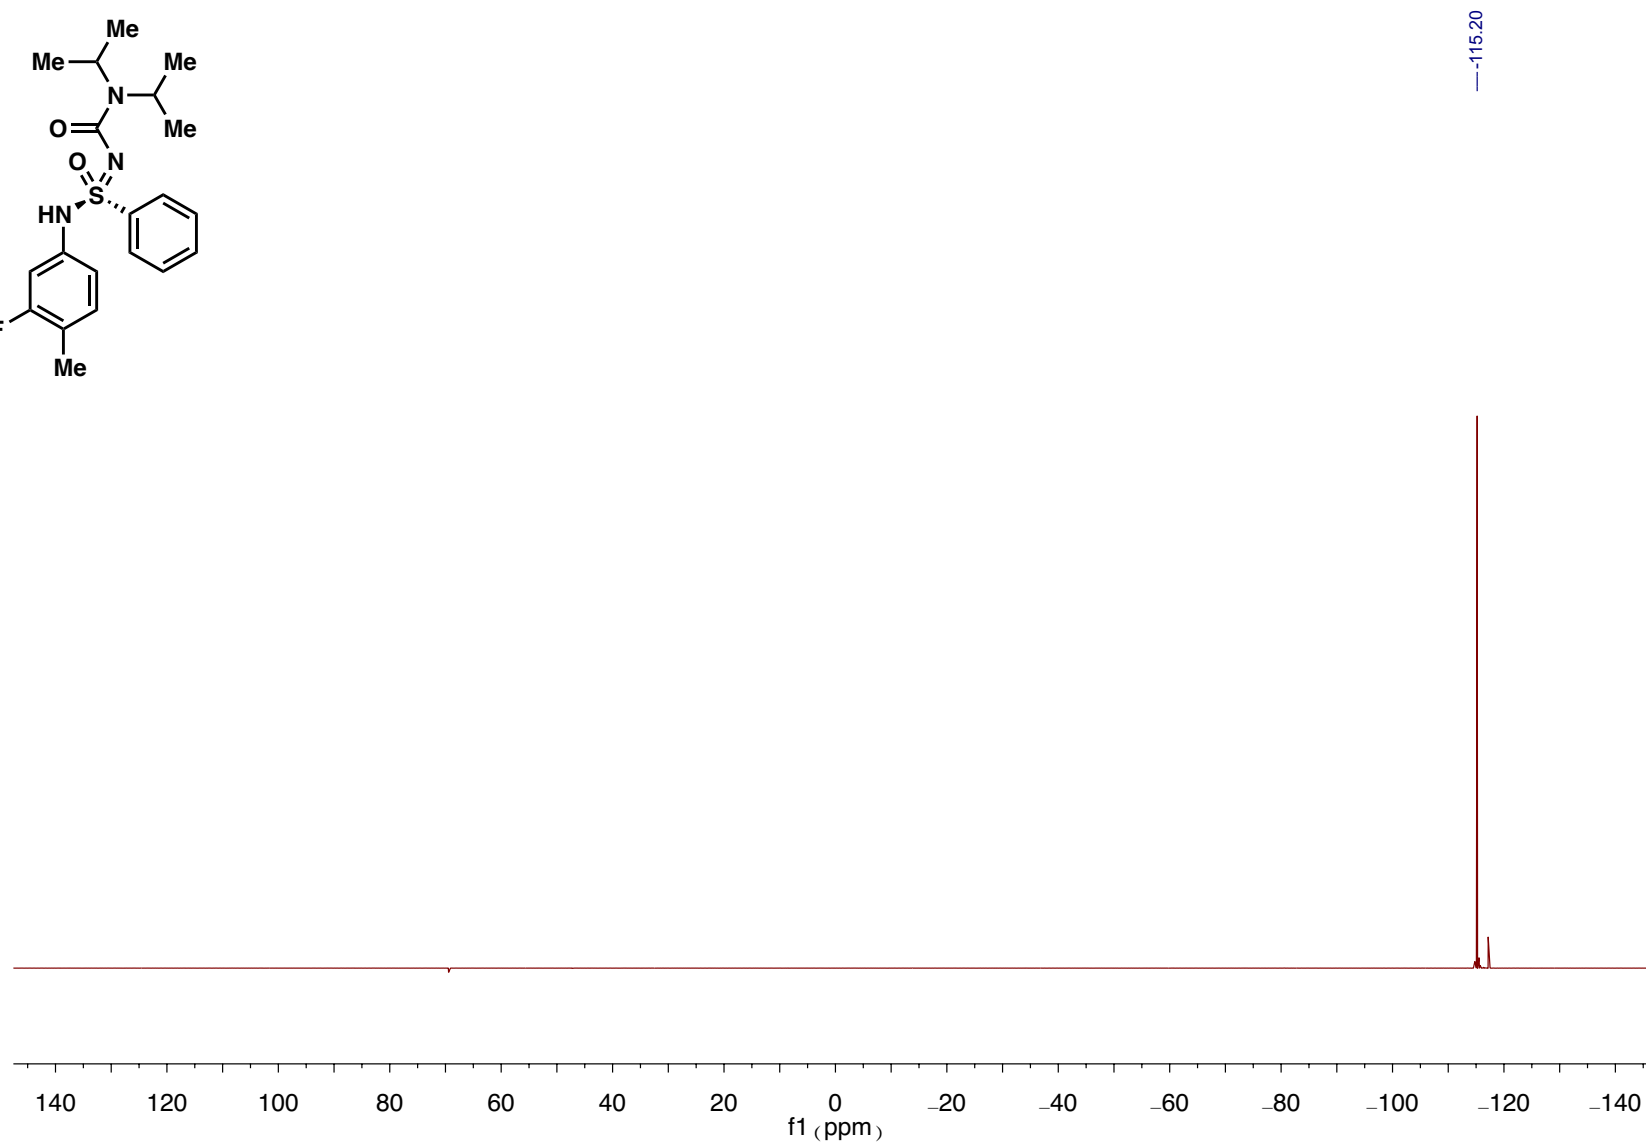

**<sup>1</sup>H NMR of compound 8e:**

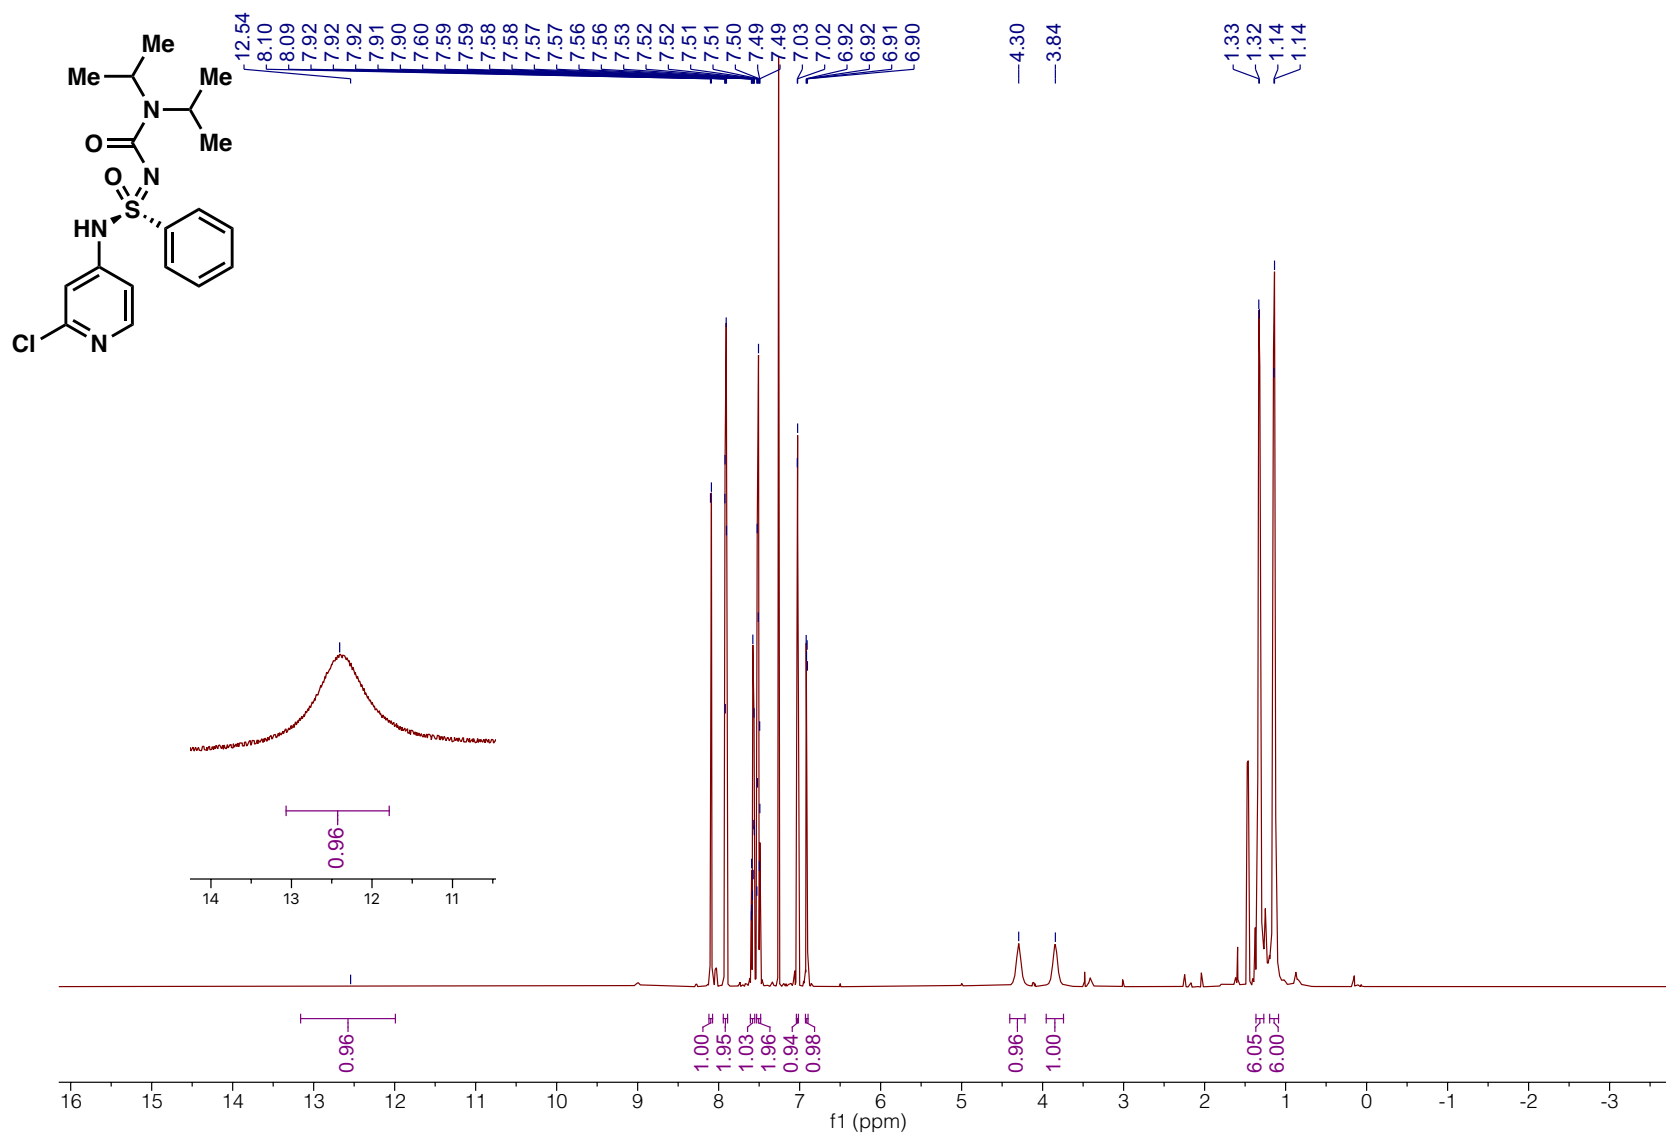

**$^{13}\text{C}$  NMR of compound 8e:**

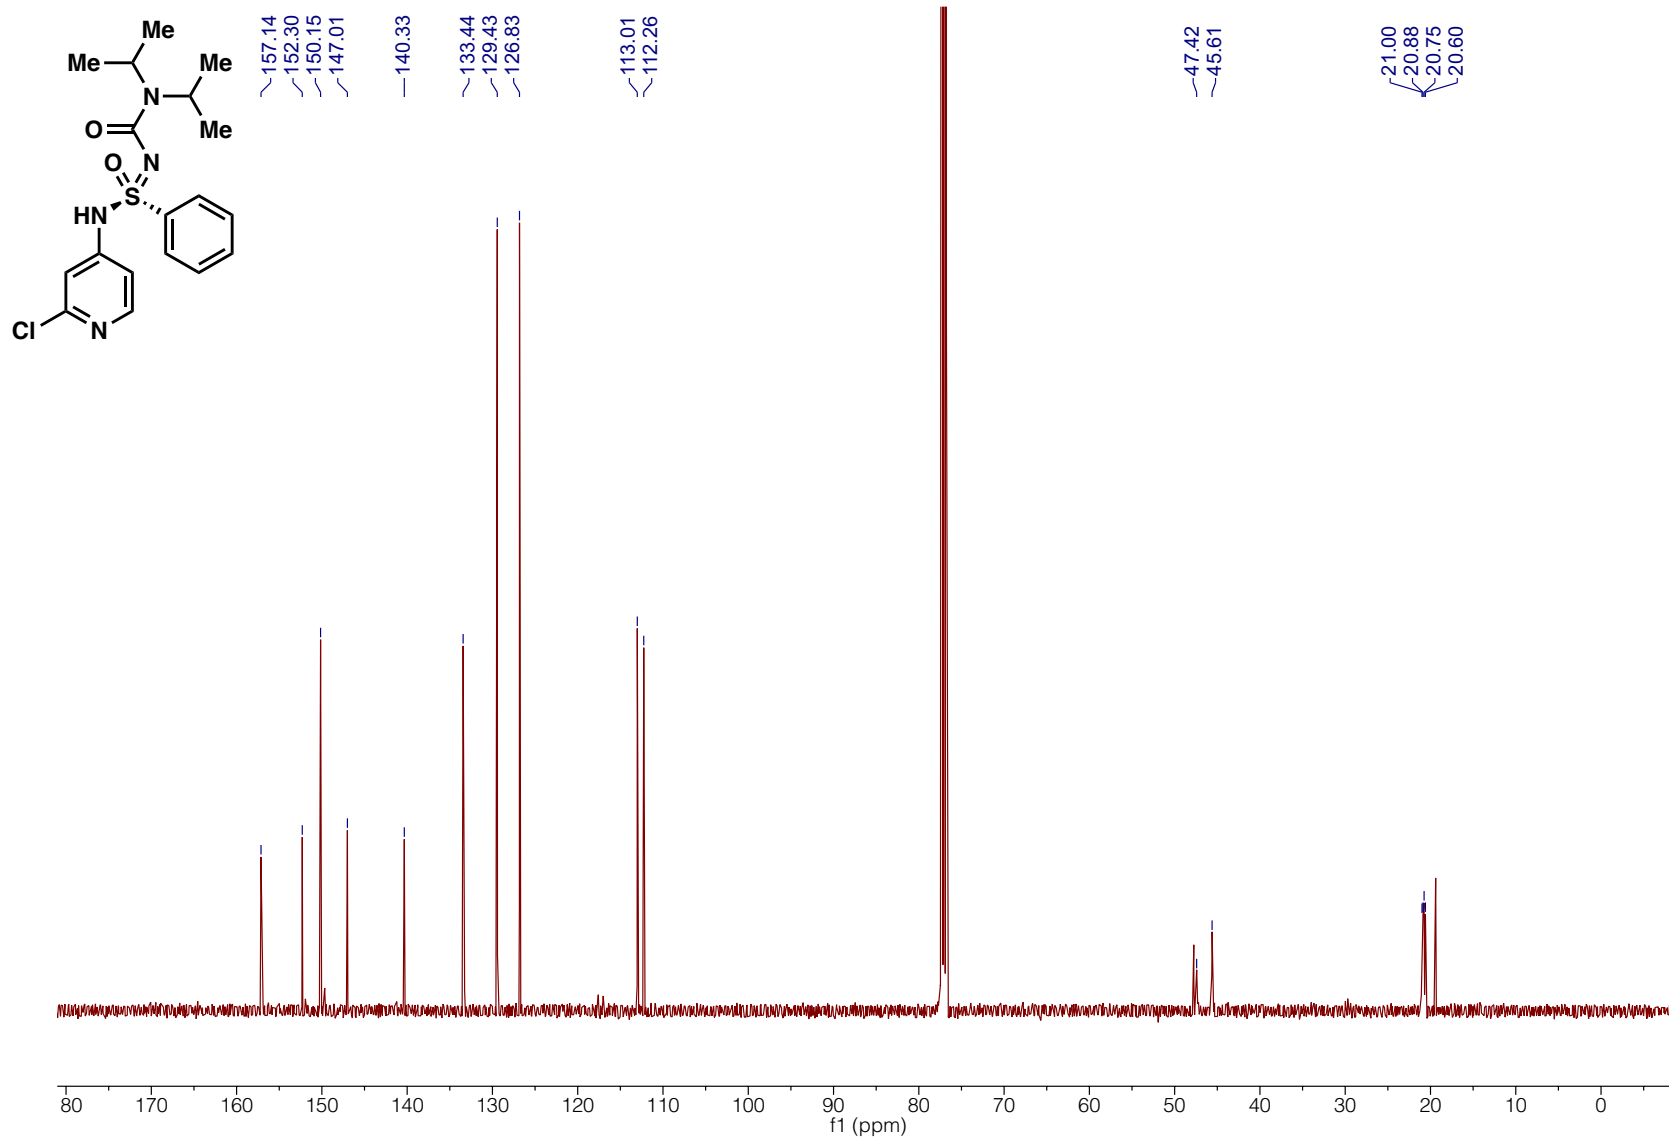

**<sup>1</sup>H NMR of compound 8f:**

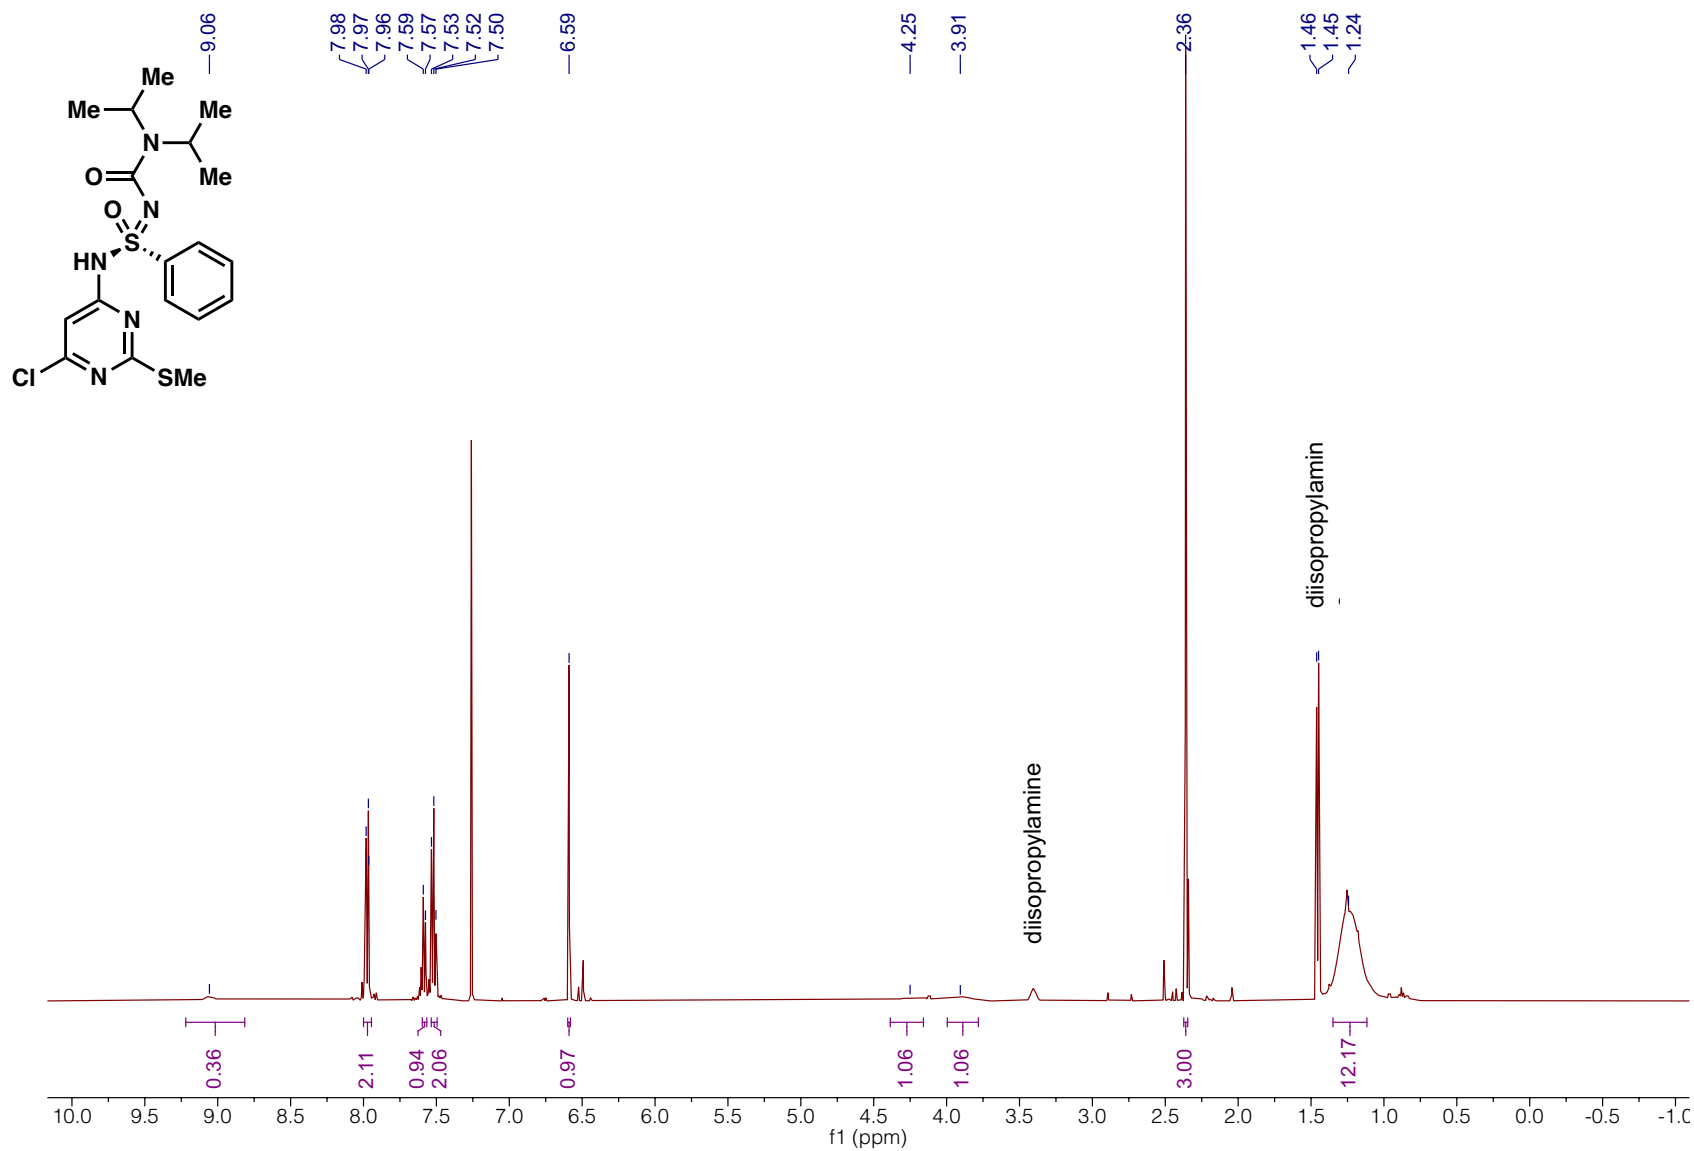

**<sup>13</sup>C NMR of compound 8f:**

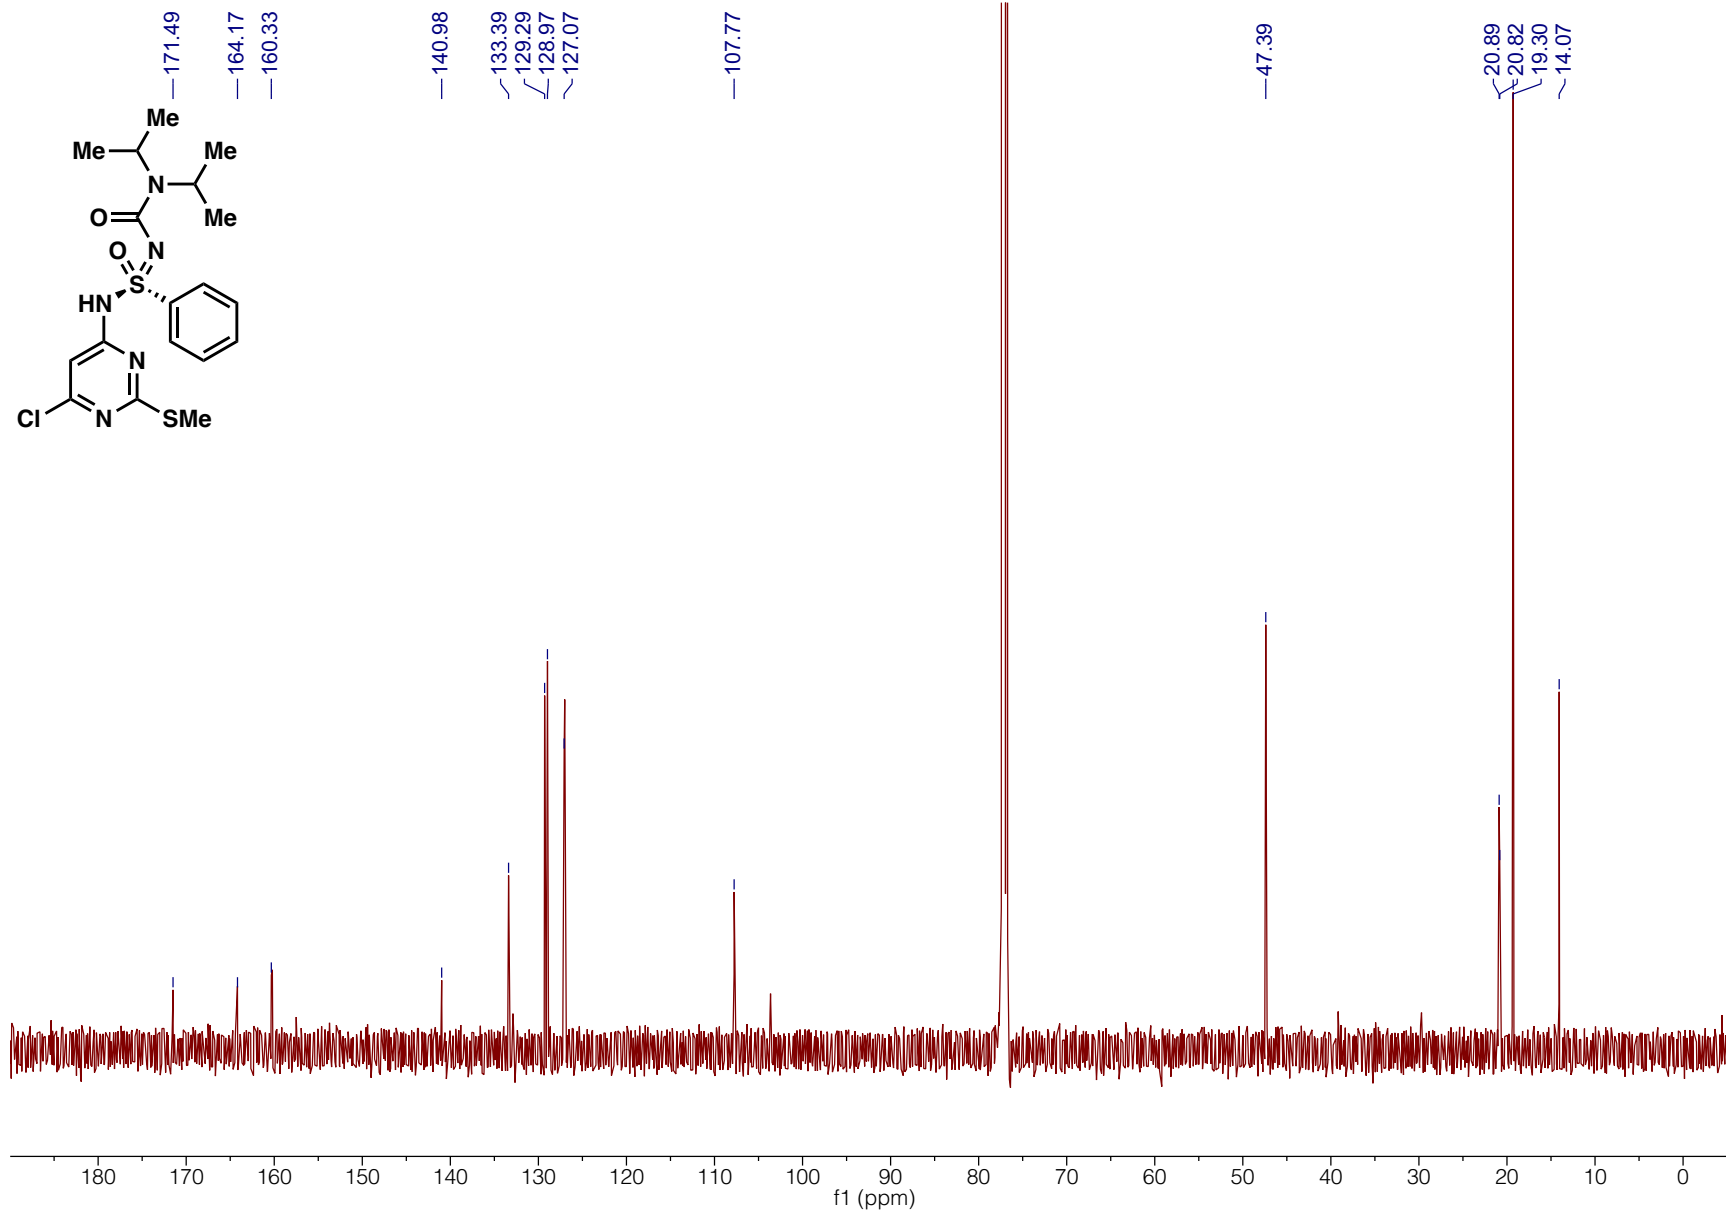

**<sup>1</sup>H NMR of compound 8g:**

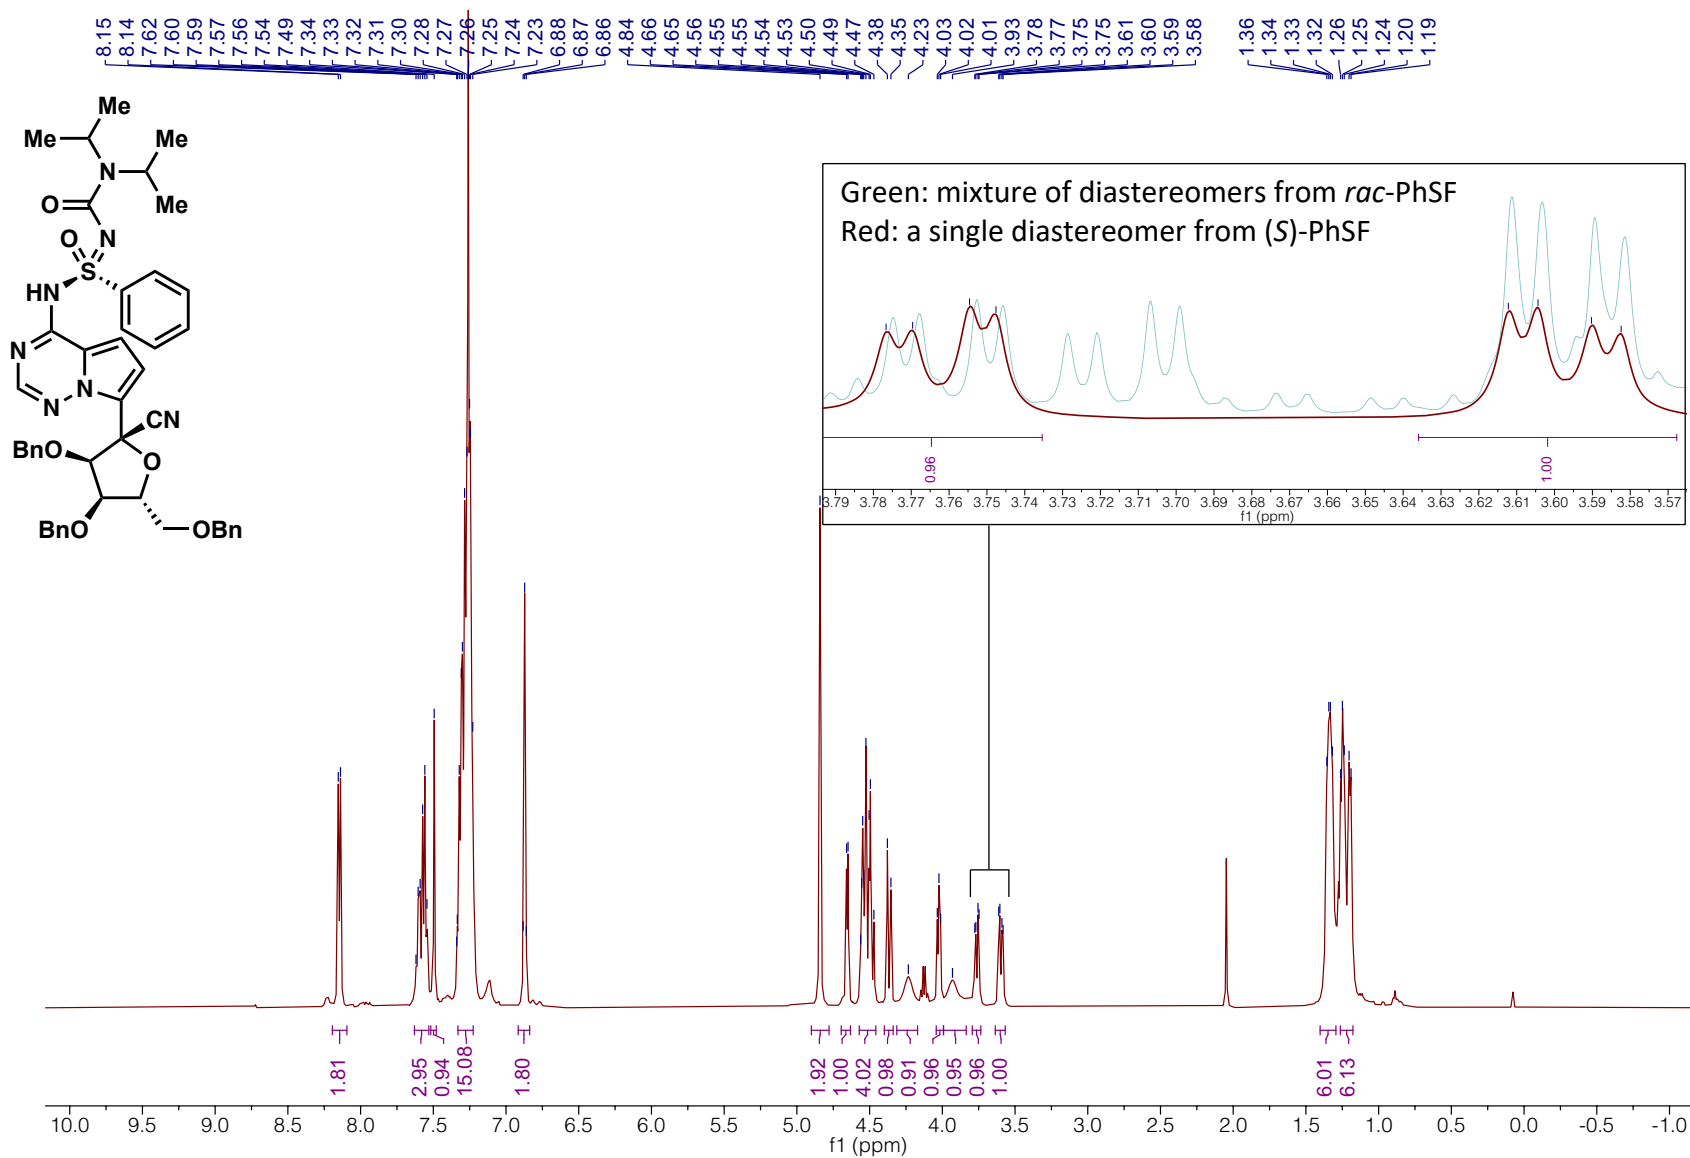

**$^{13}\text{C}$  NMR of compound 8g:**

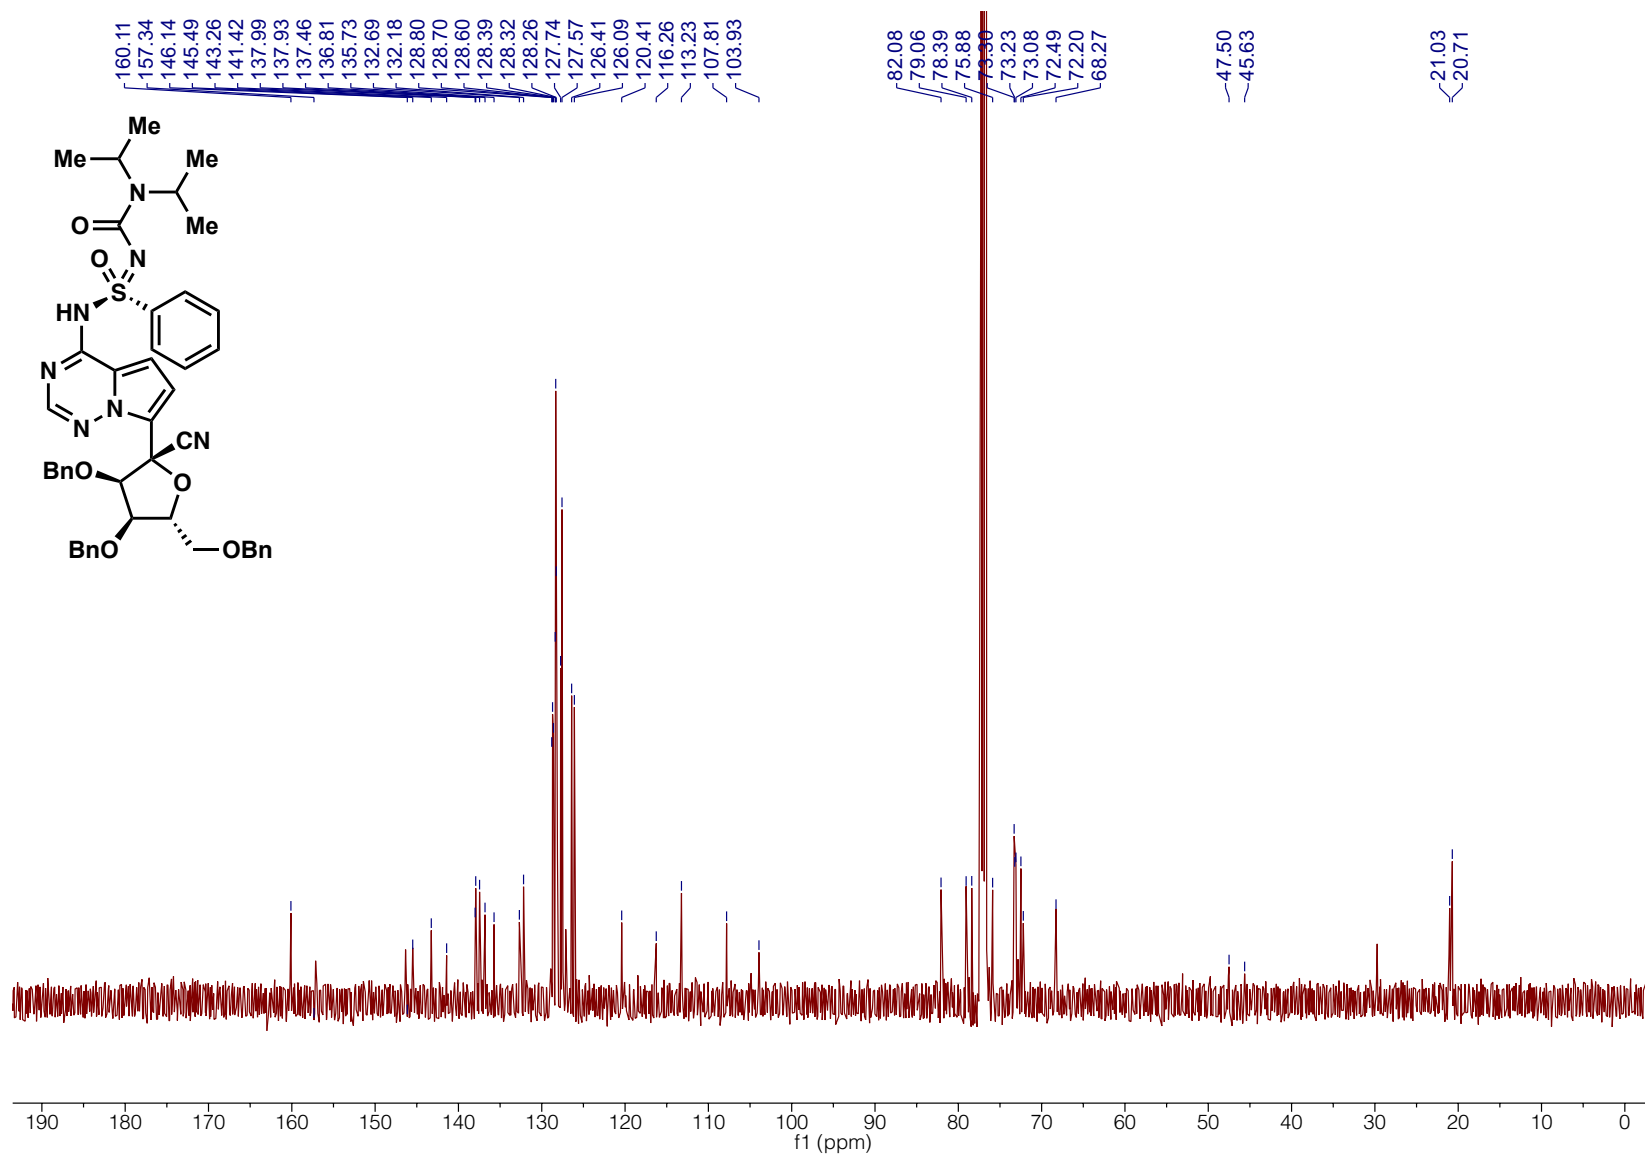

# <sup>1</sup>H NMR of compound 8h:

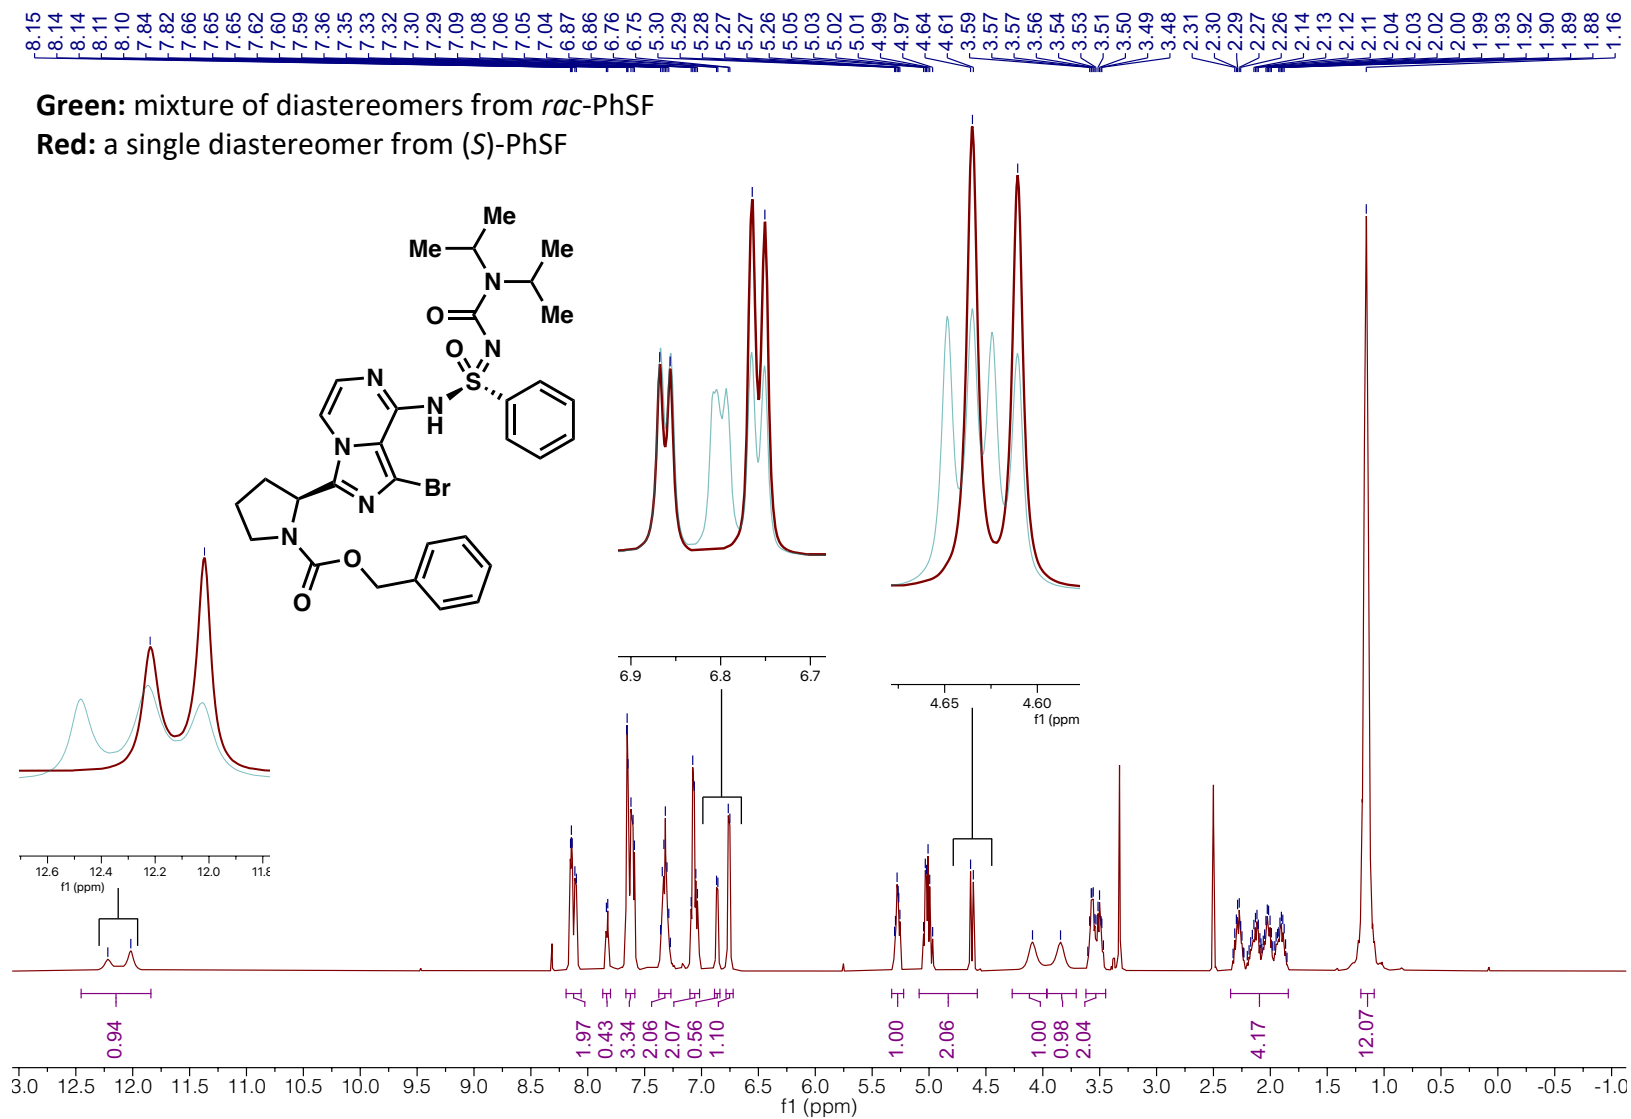

**$^{13}\text{C}$  NMR of compound 8h:**

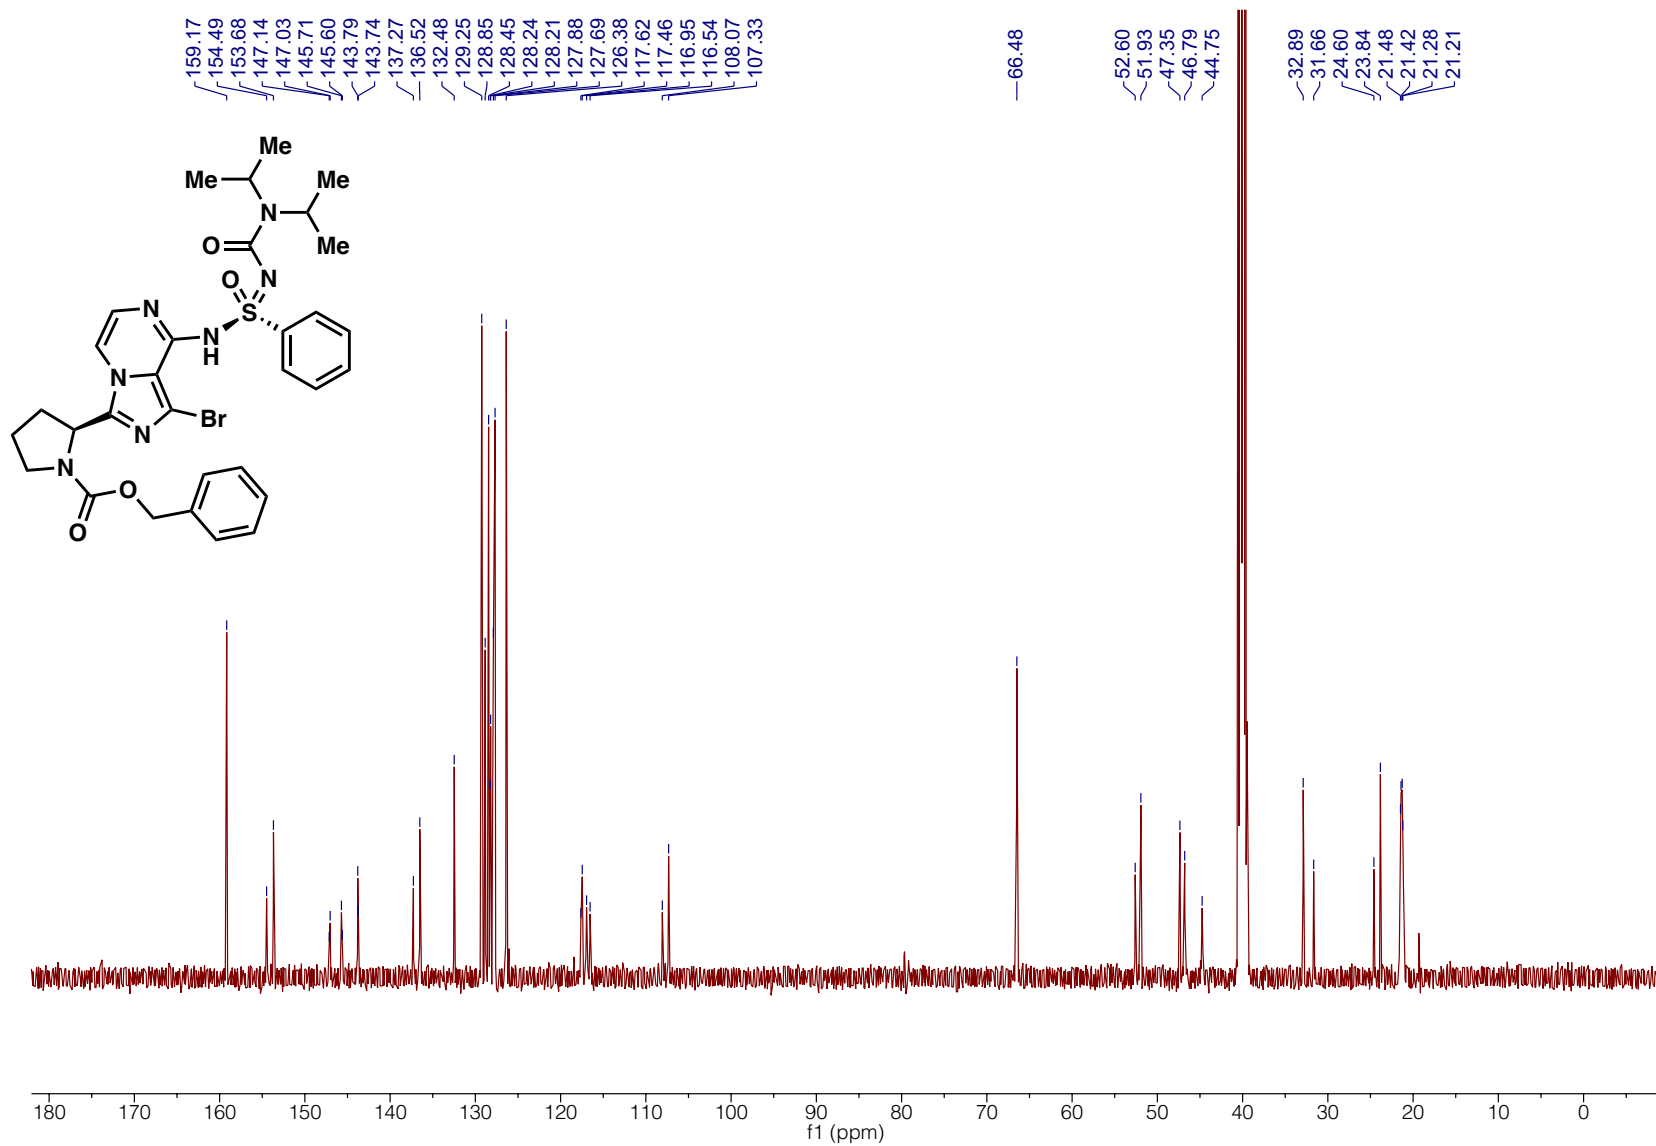

**<sup>1</sup>H NMR of compound 8i:**

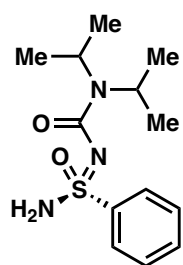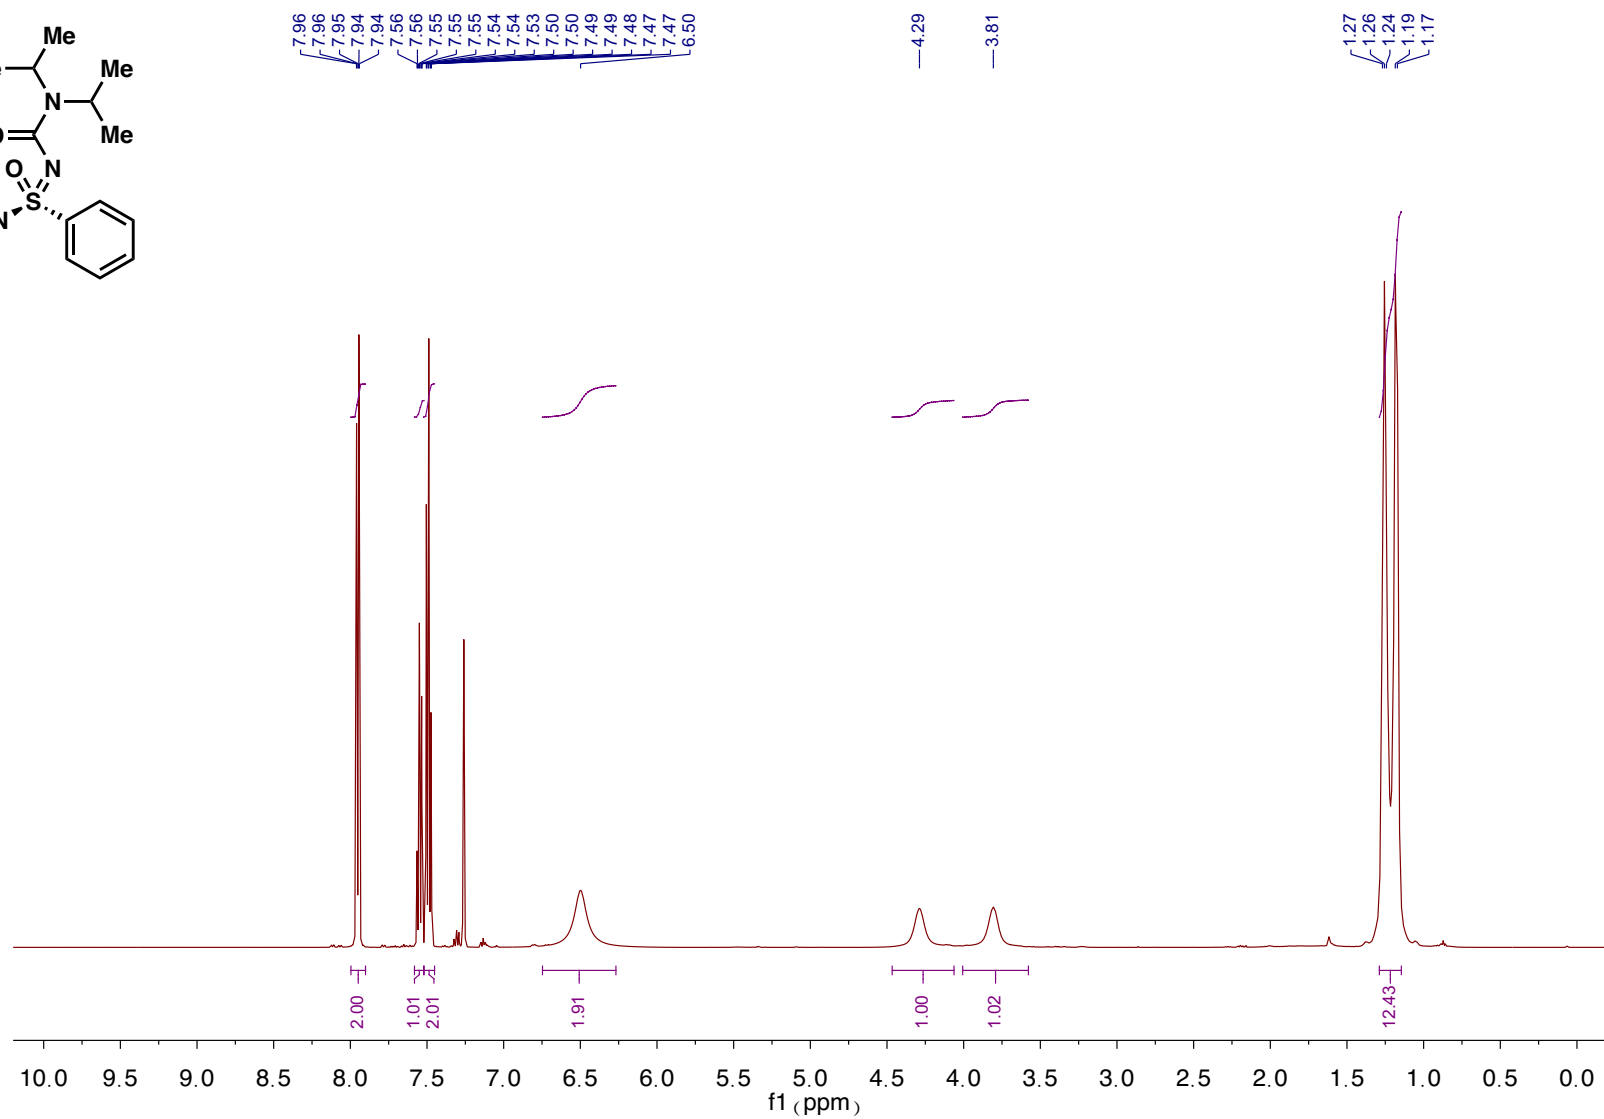

**$^{13}\text{C}$  NMR of compound 8i:**

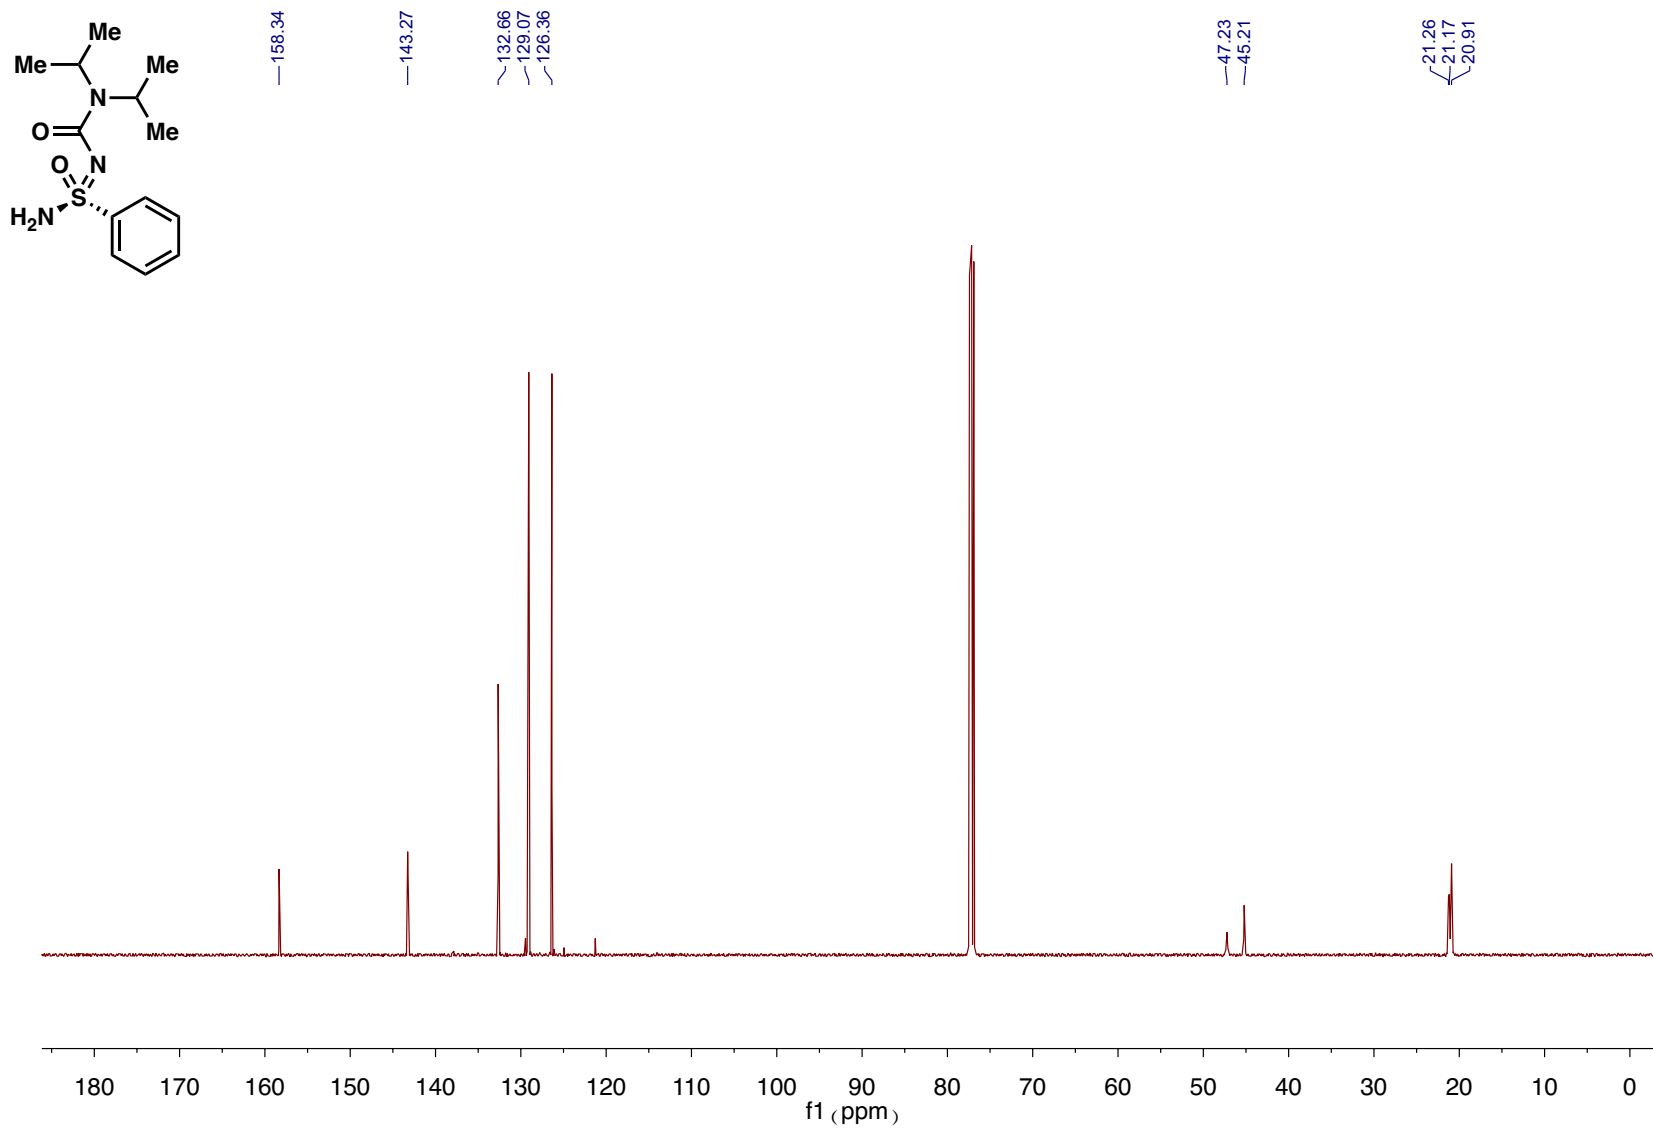

**<sup>1</sup>H NMR of compound 8j:**

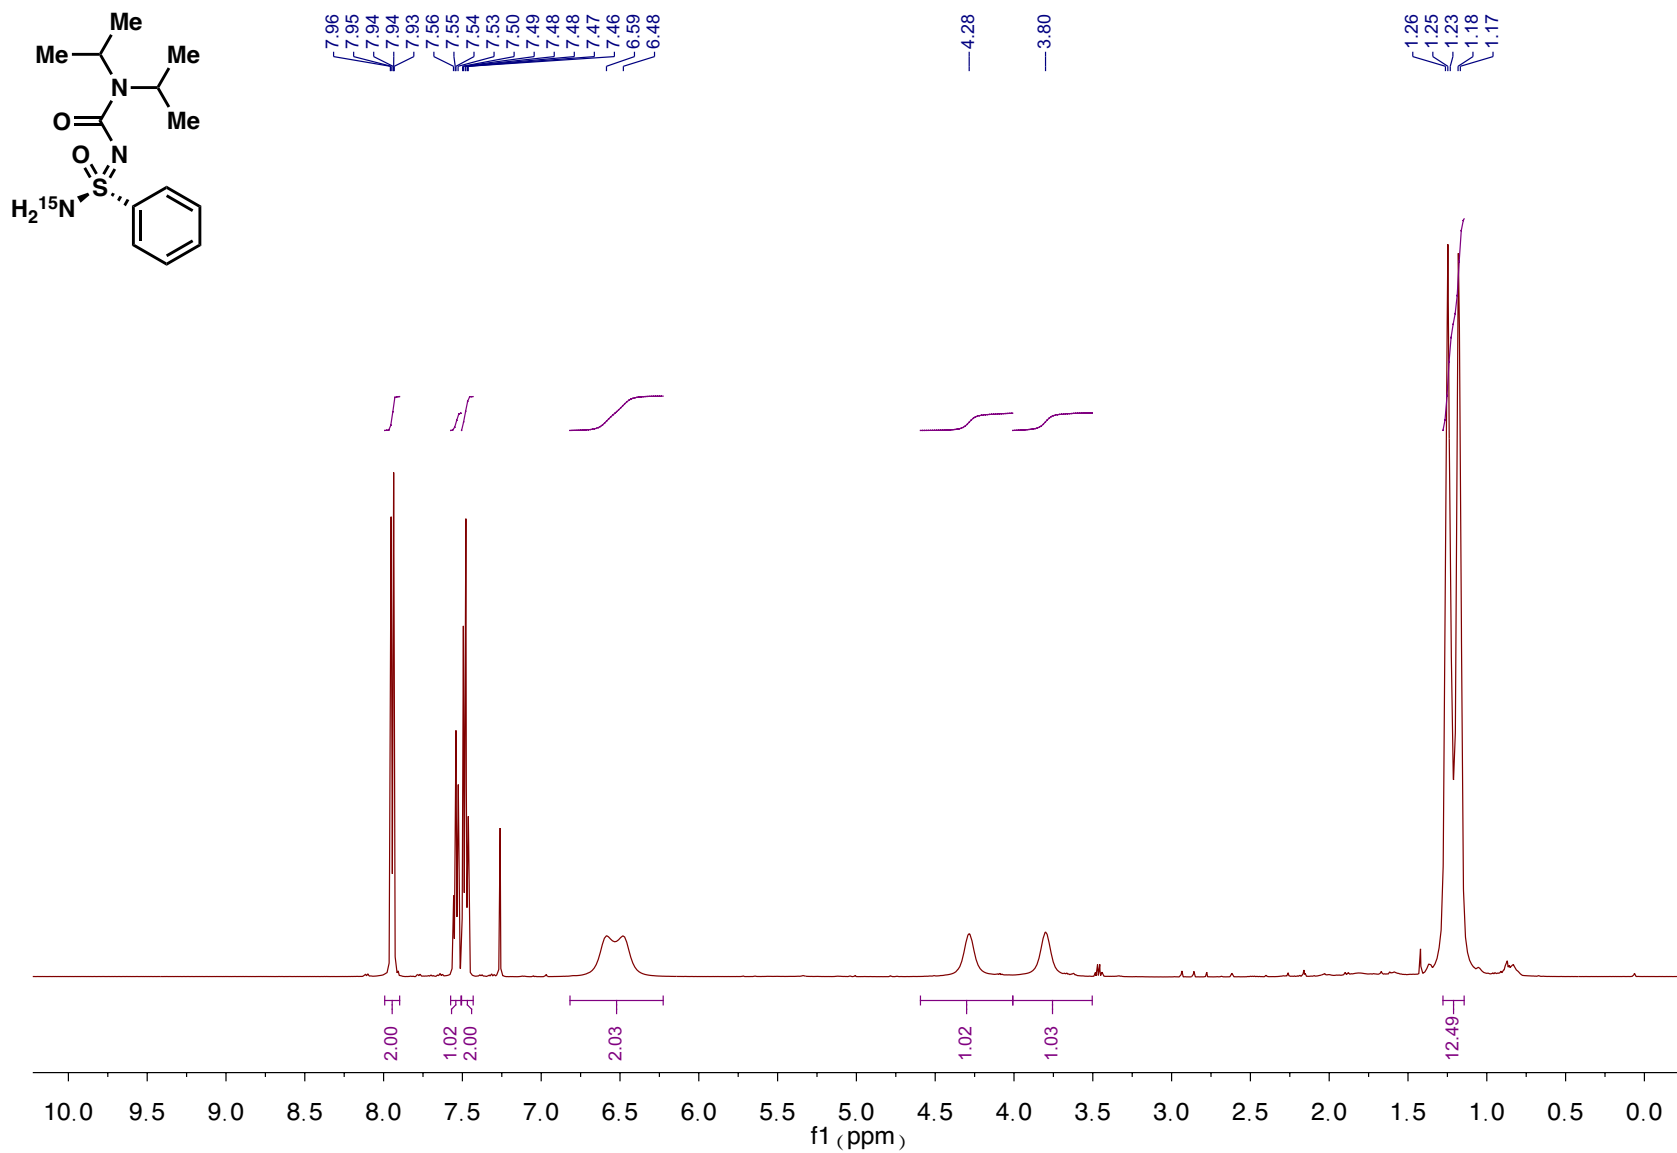

**$^{13}\text{C}$  NMR of compound 8j:**

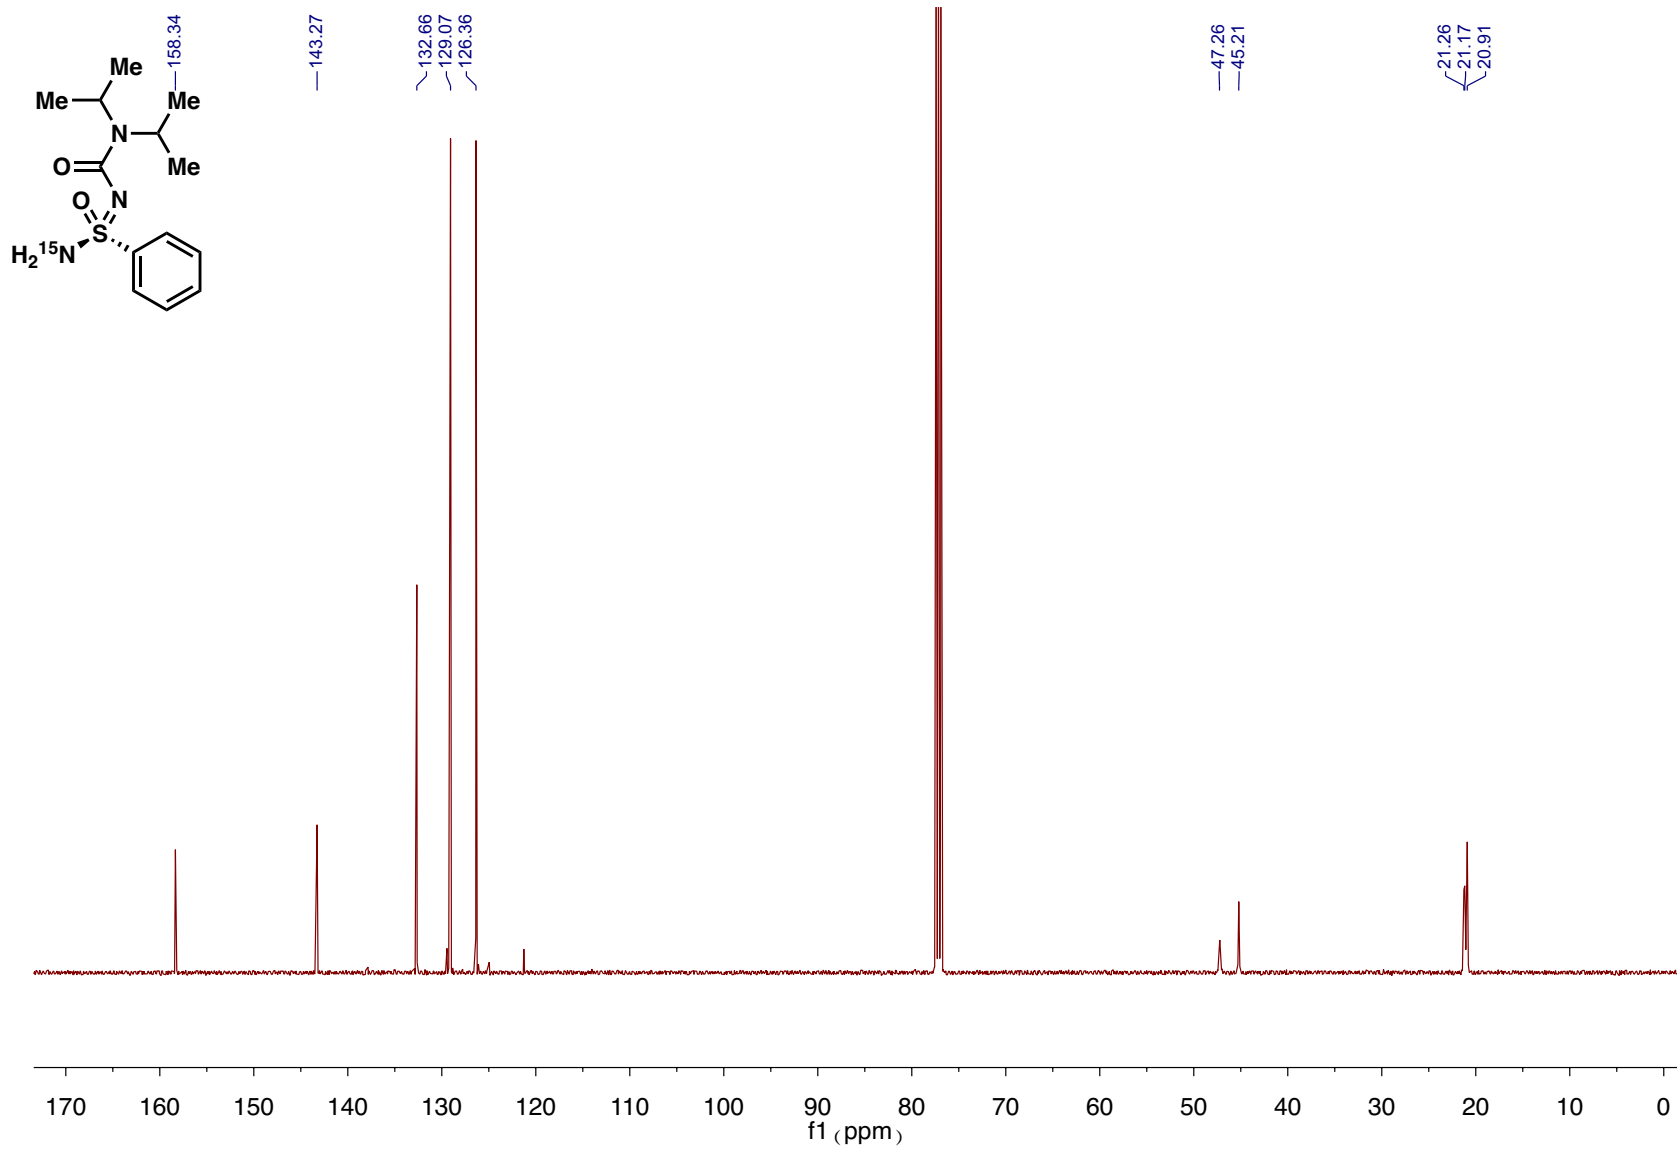

**<sup>1</sup>H NMR of compound 8k:**

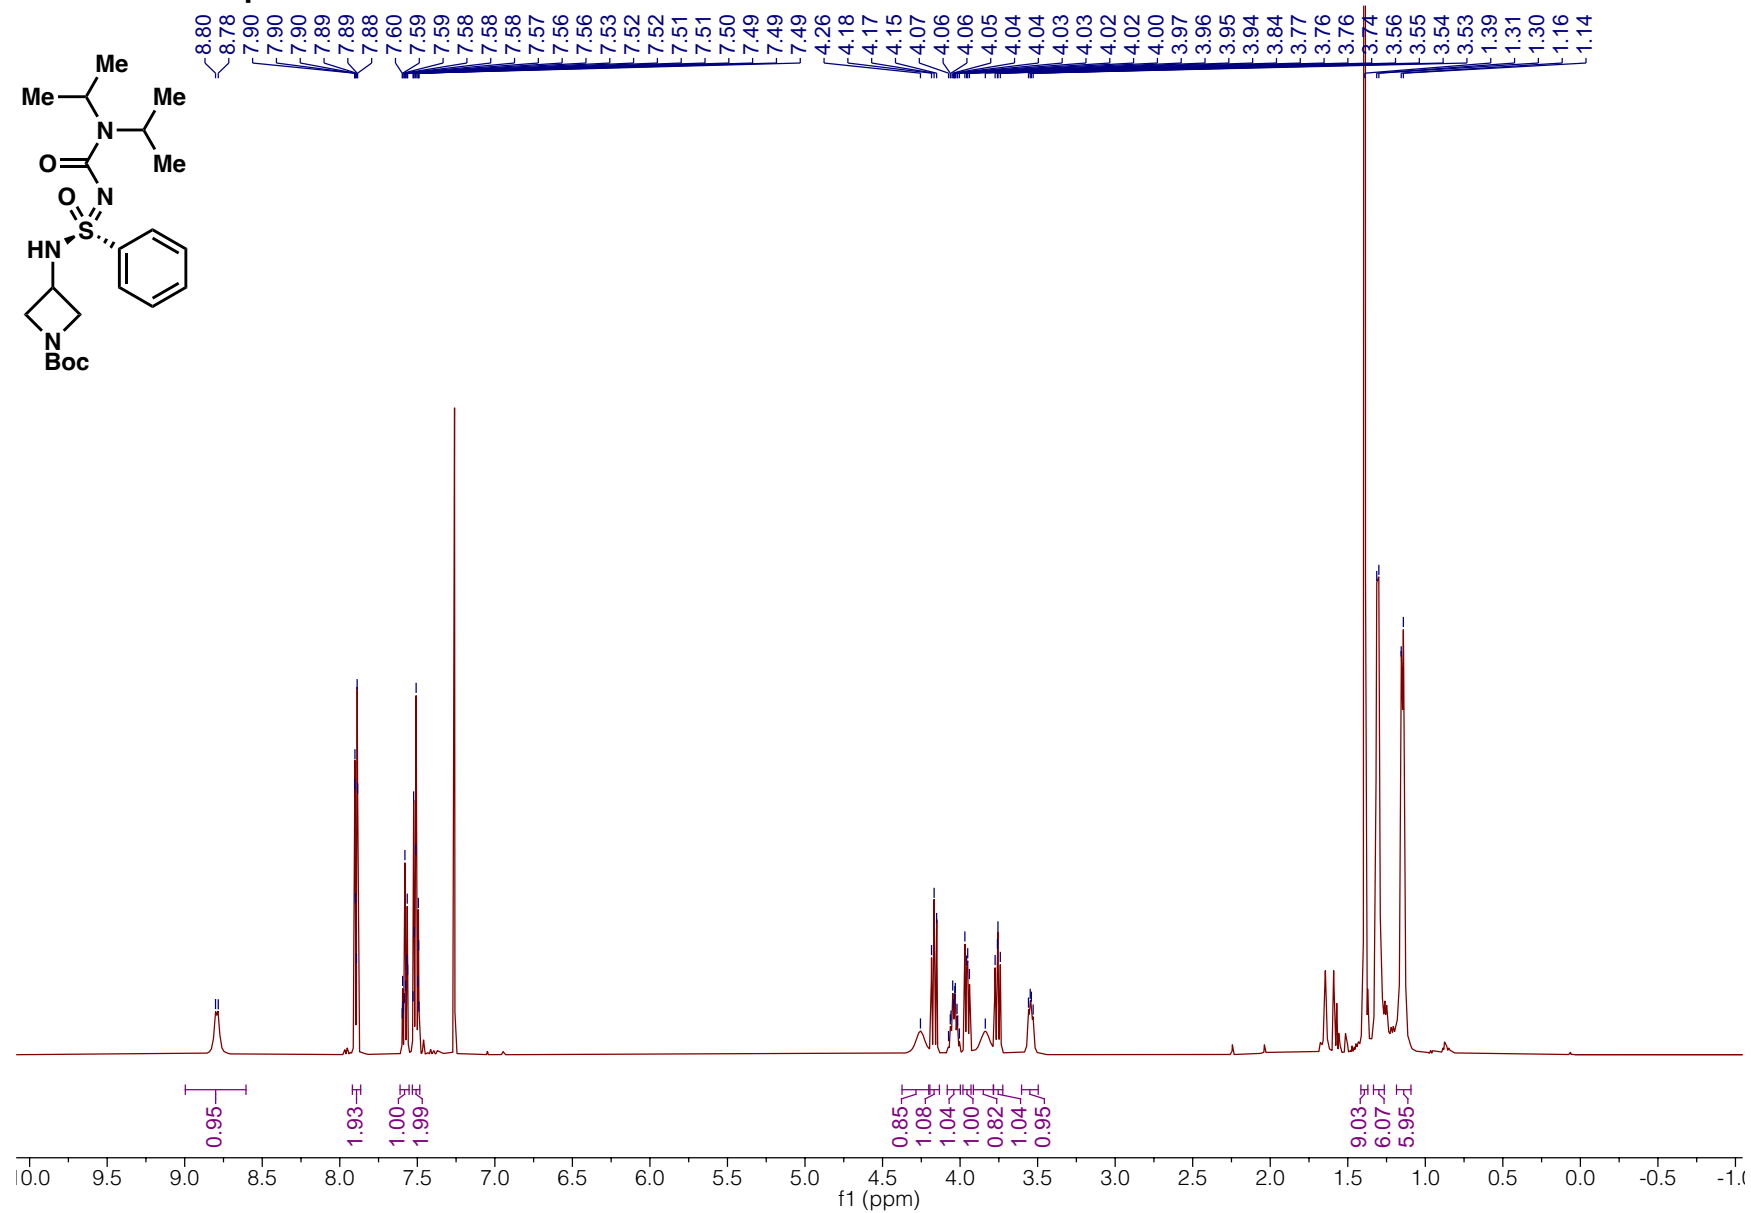

**$^{13}\text{C}$  NMR of compound 8k:**

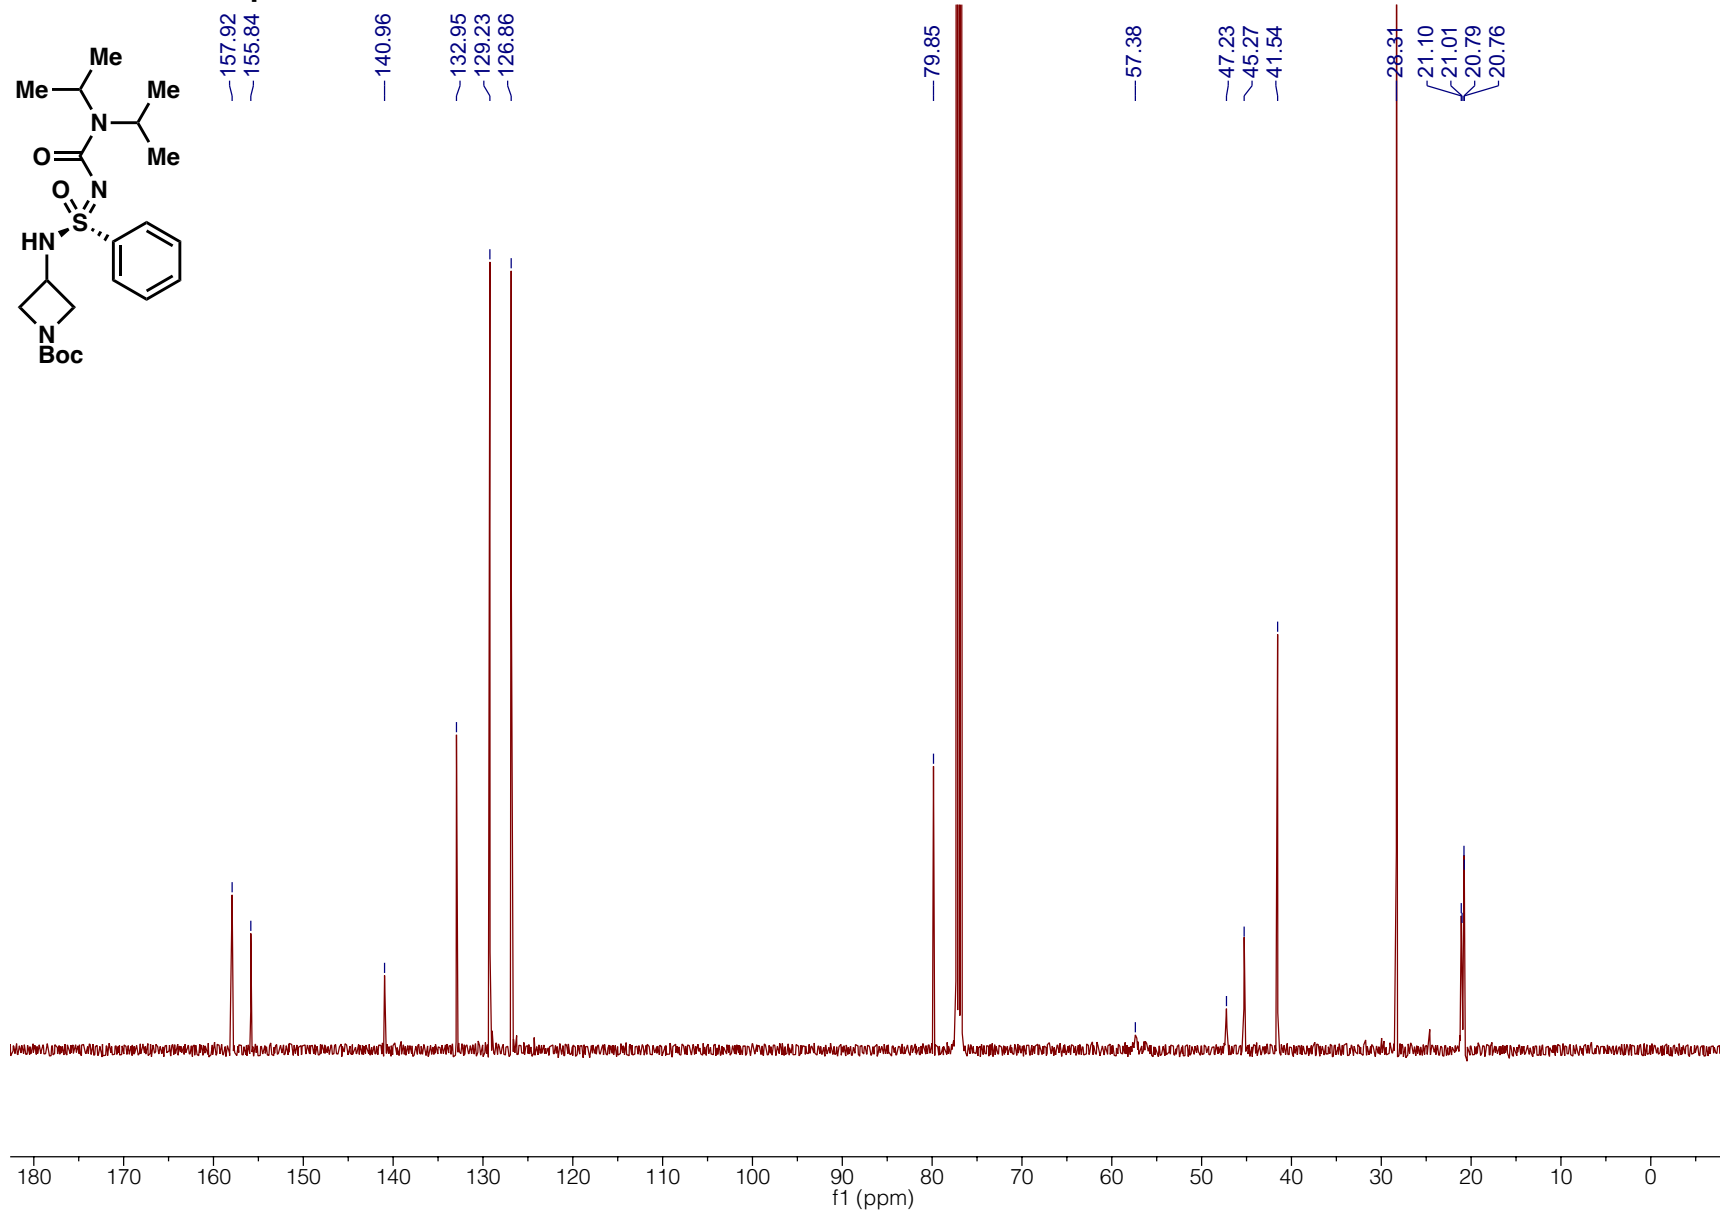

**<sup>1</sup>H NMR of compound 8l:**

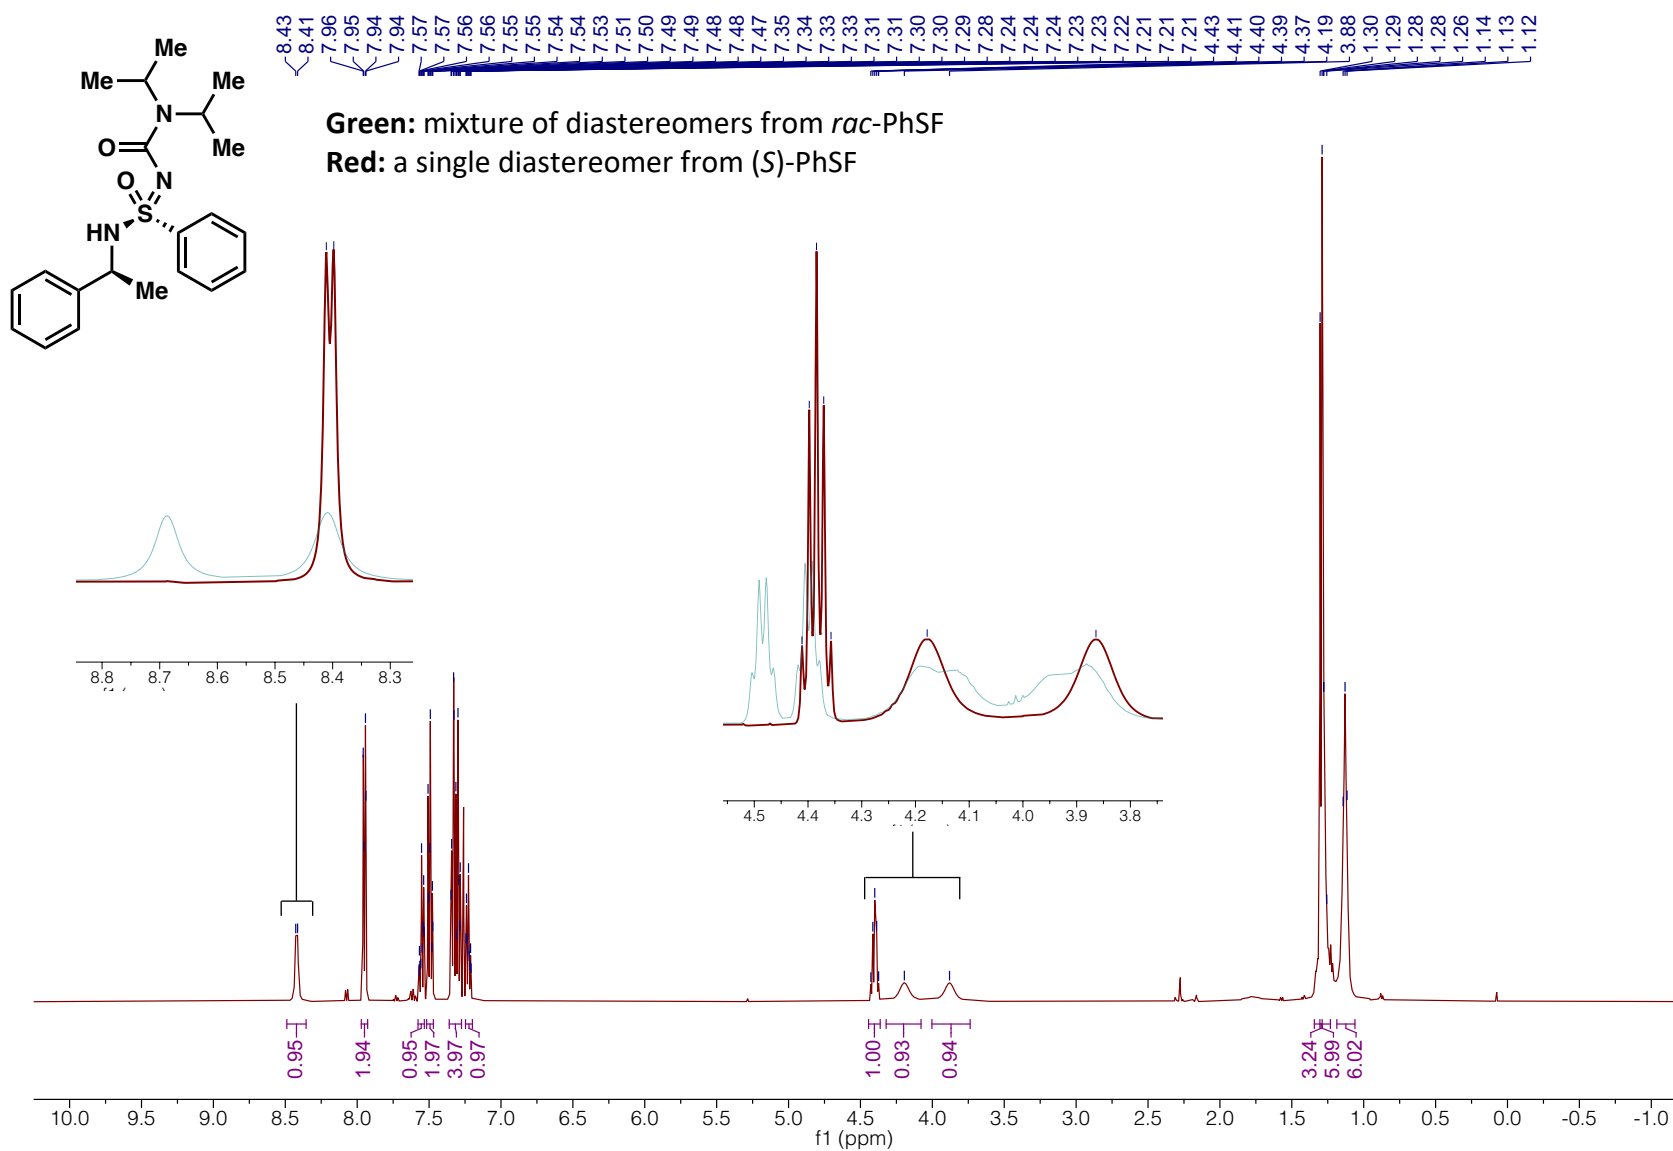

**$^{13}\text{C}$  NMR of compound 8I:**

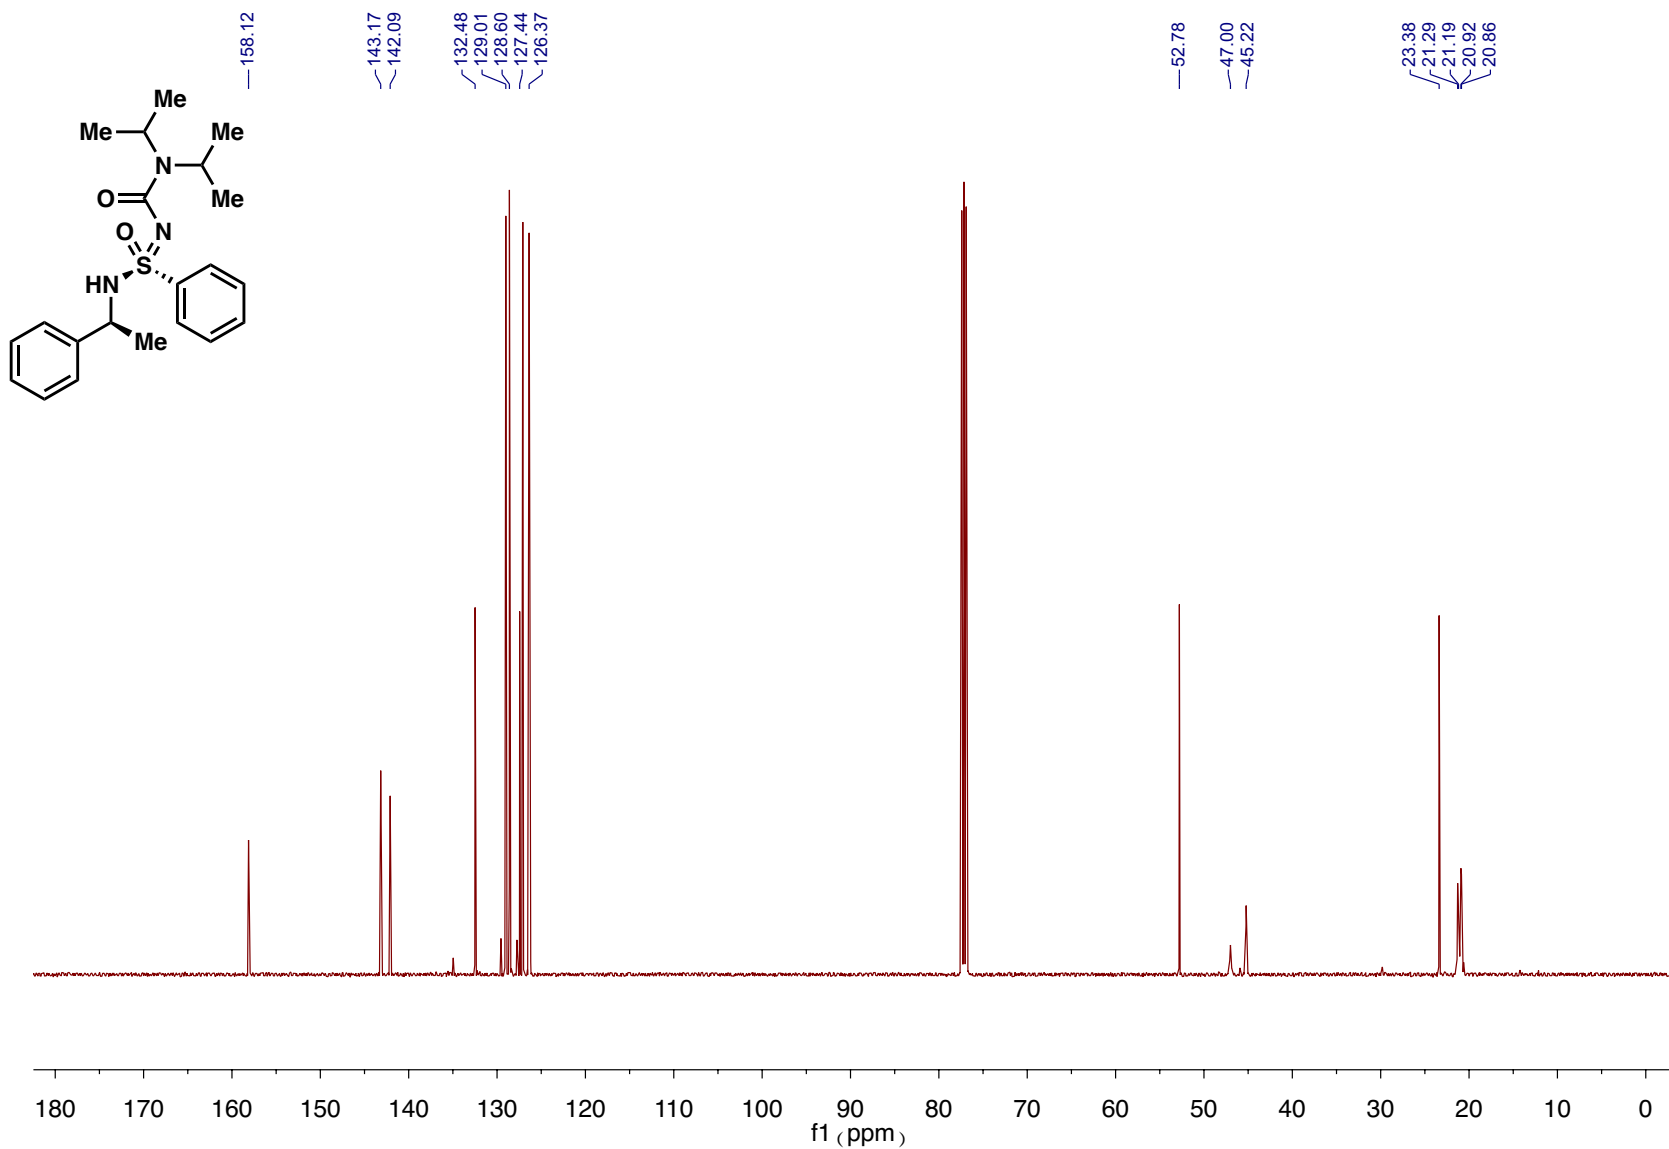

**<sup>1</sup>H NMR of compound 8m:**

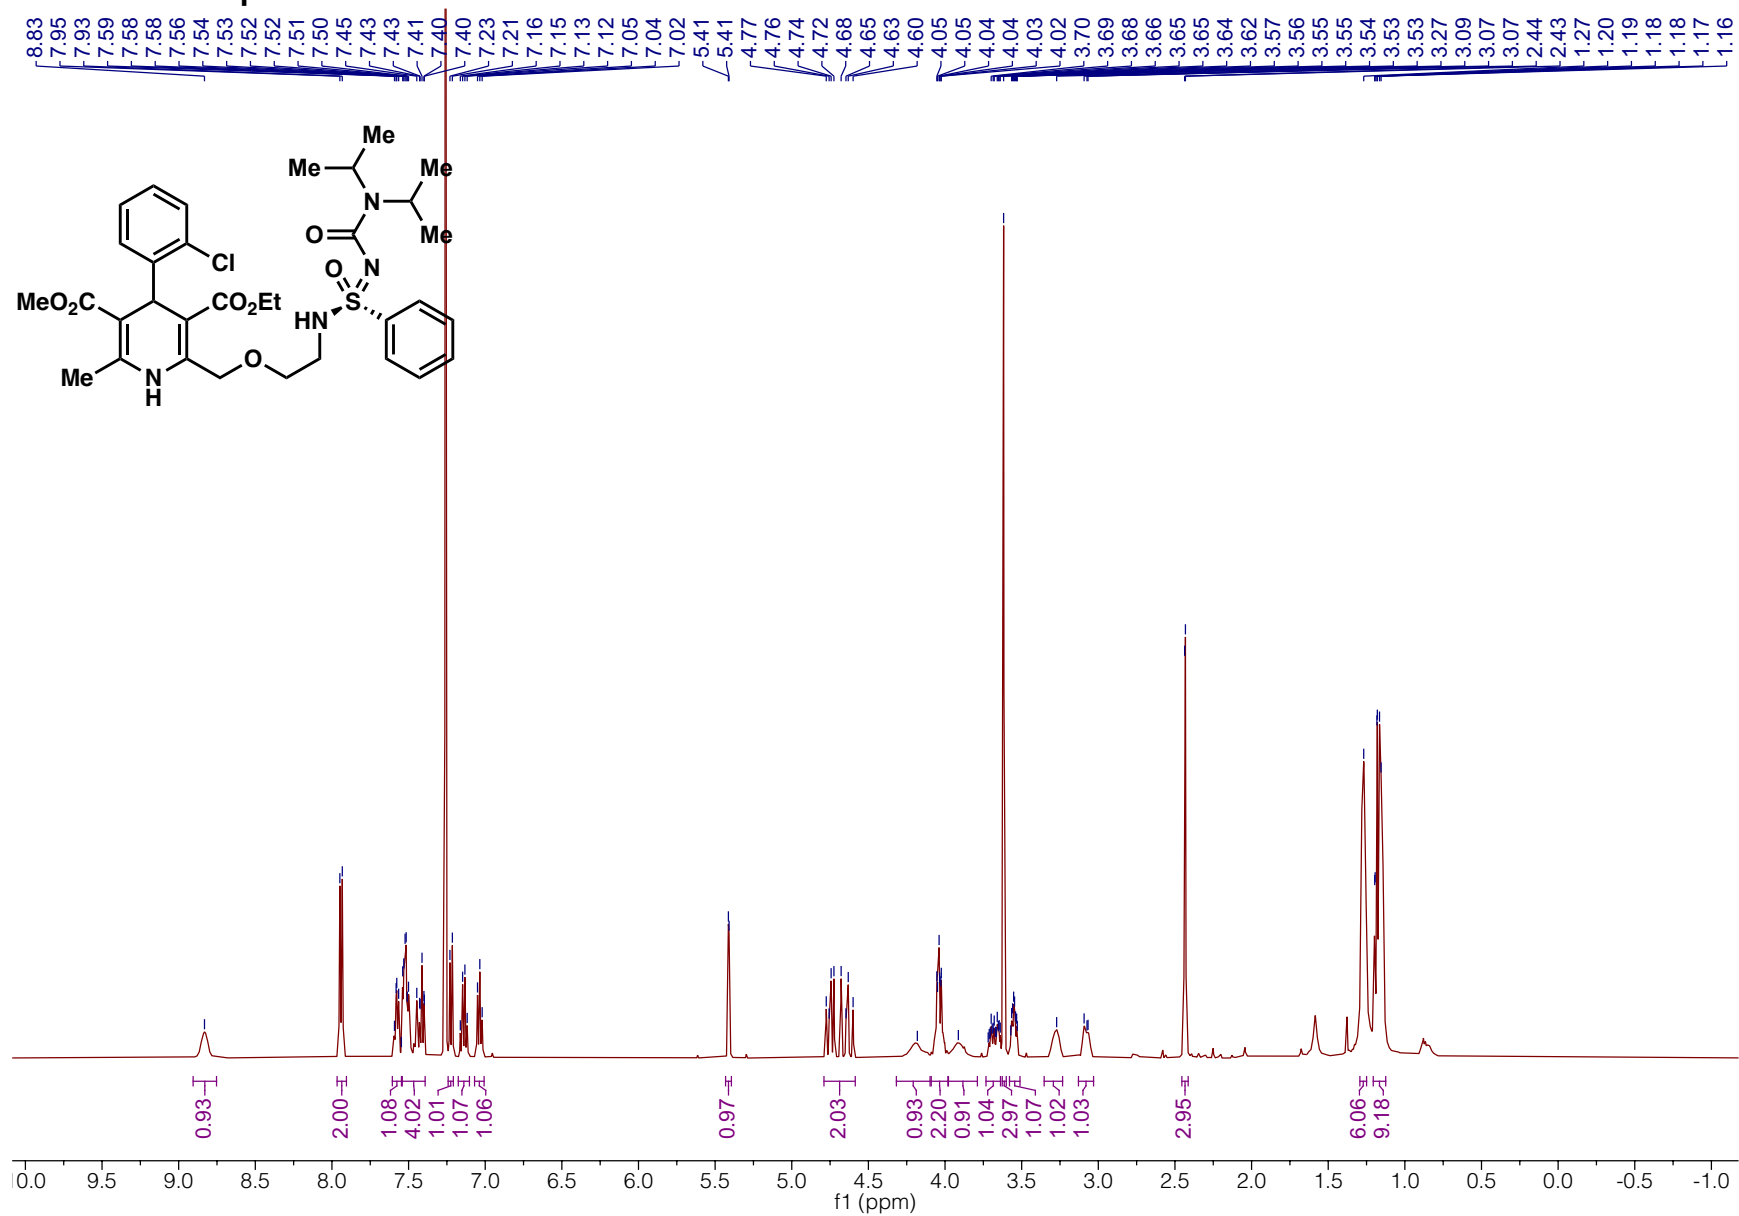

**$^{13}\text{C}$  NMR of compound 8m:**

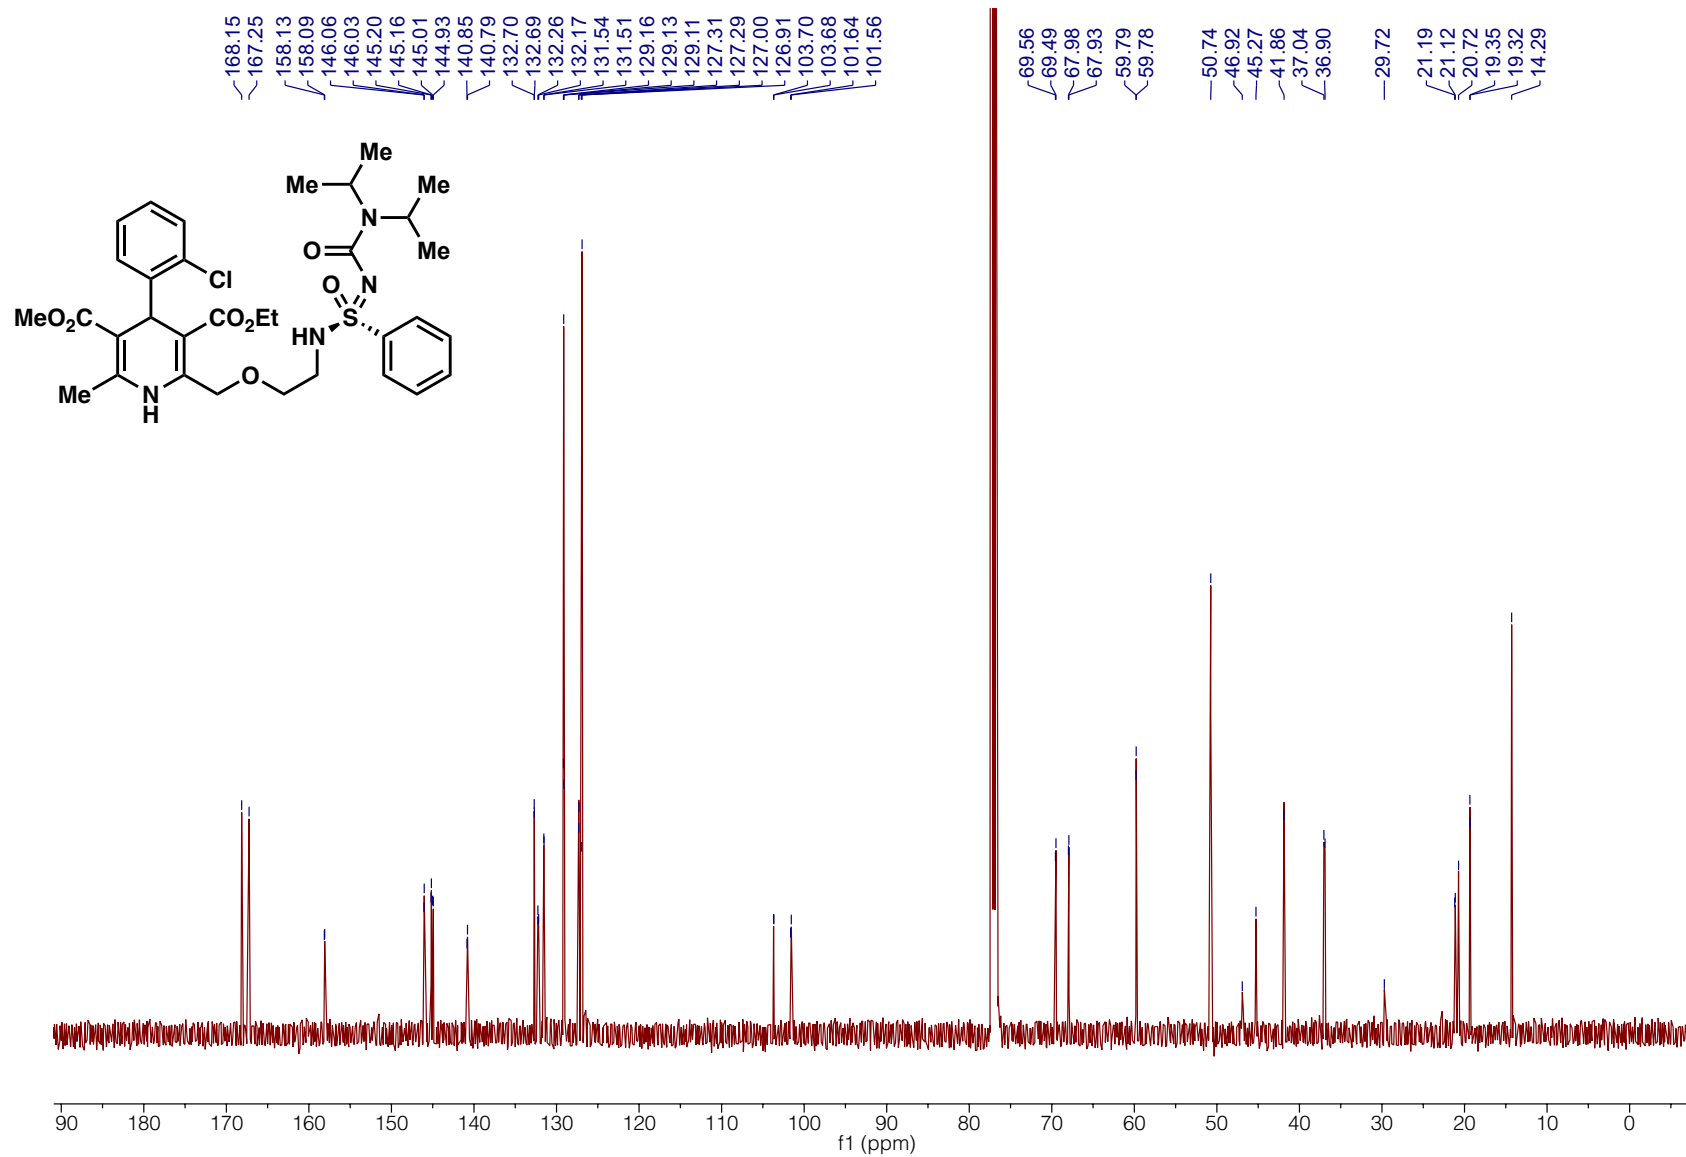

**<sup>1</sup>H NMR of compound 8n:**

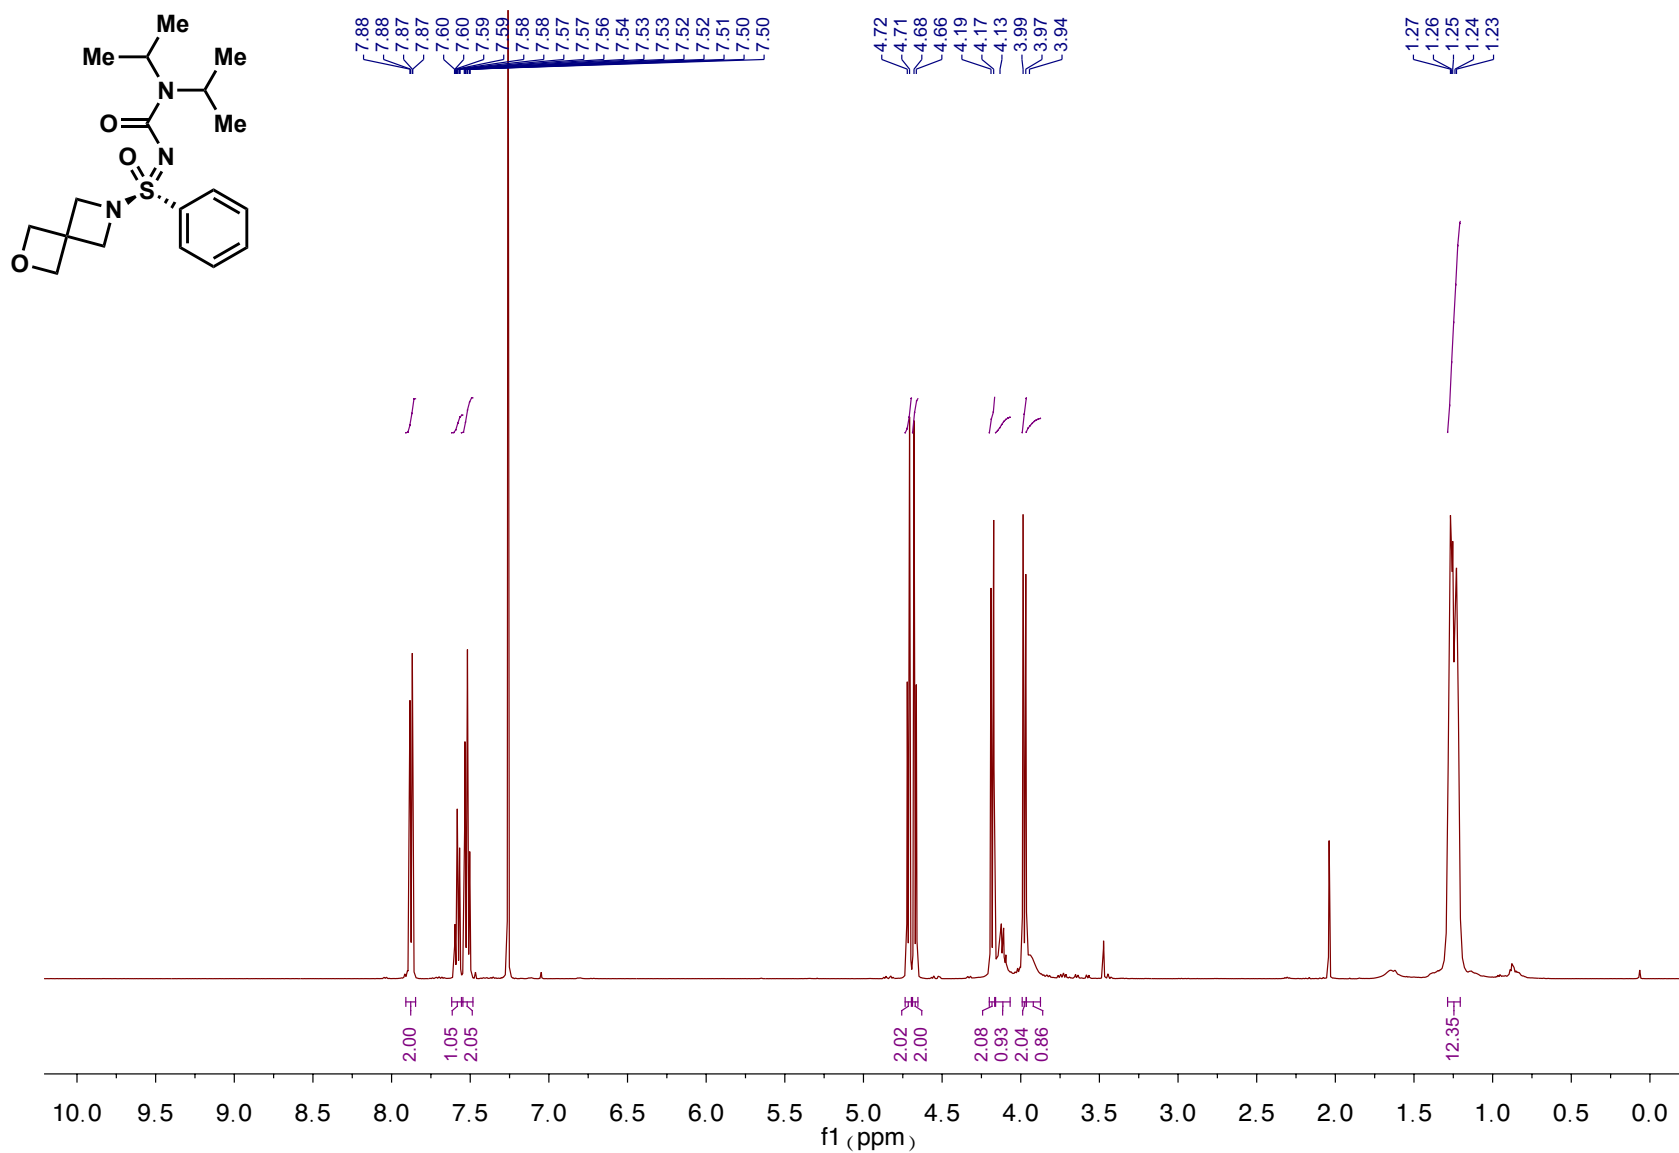

**<sup>13</sup>C NMR of compound 8n:**

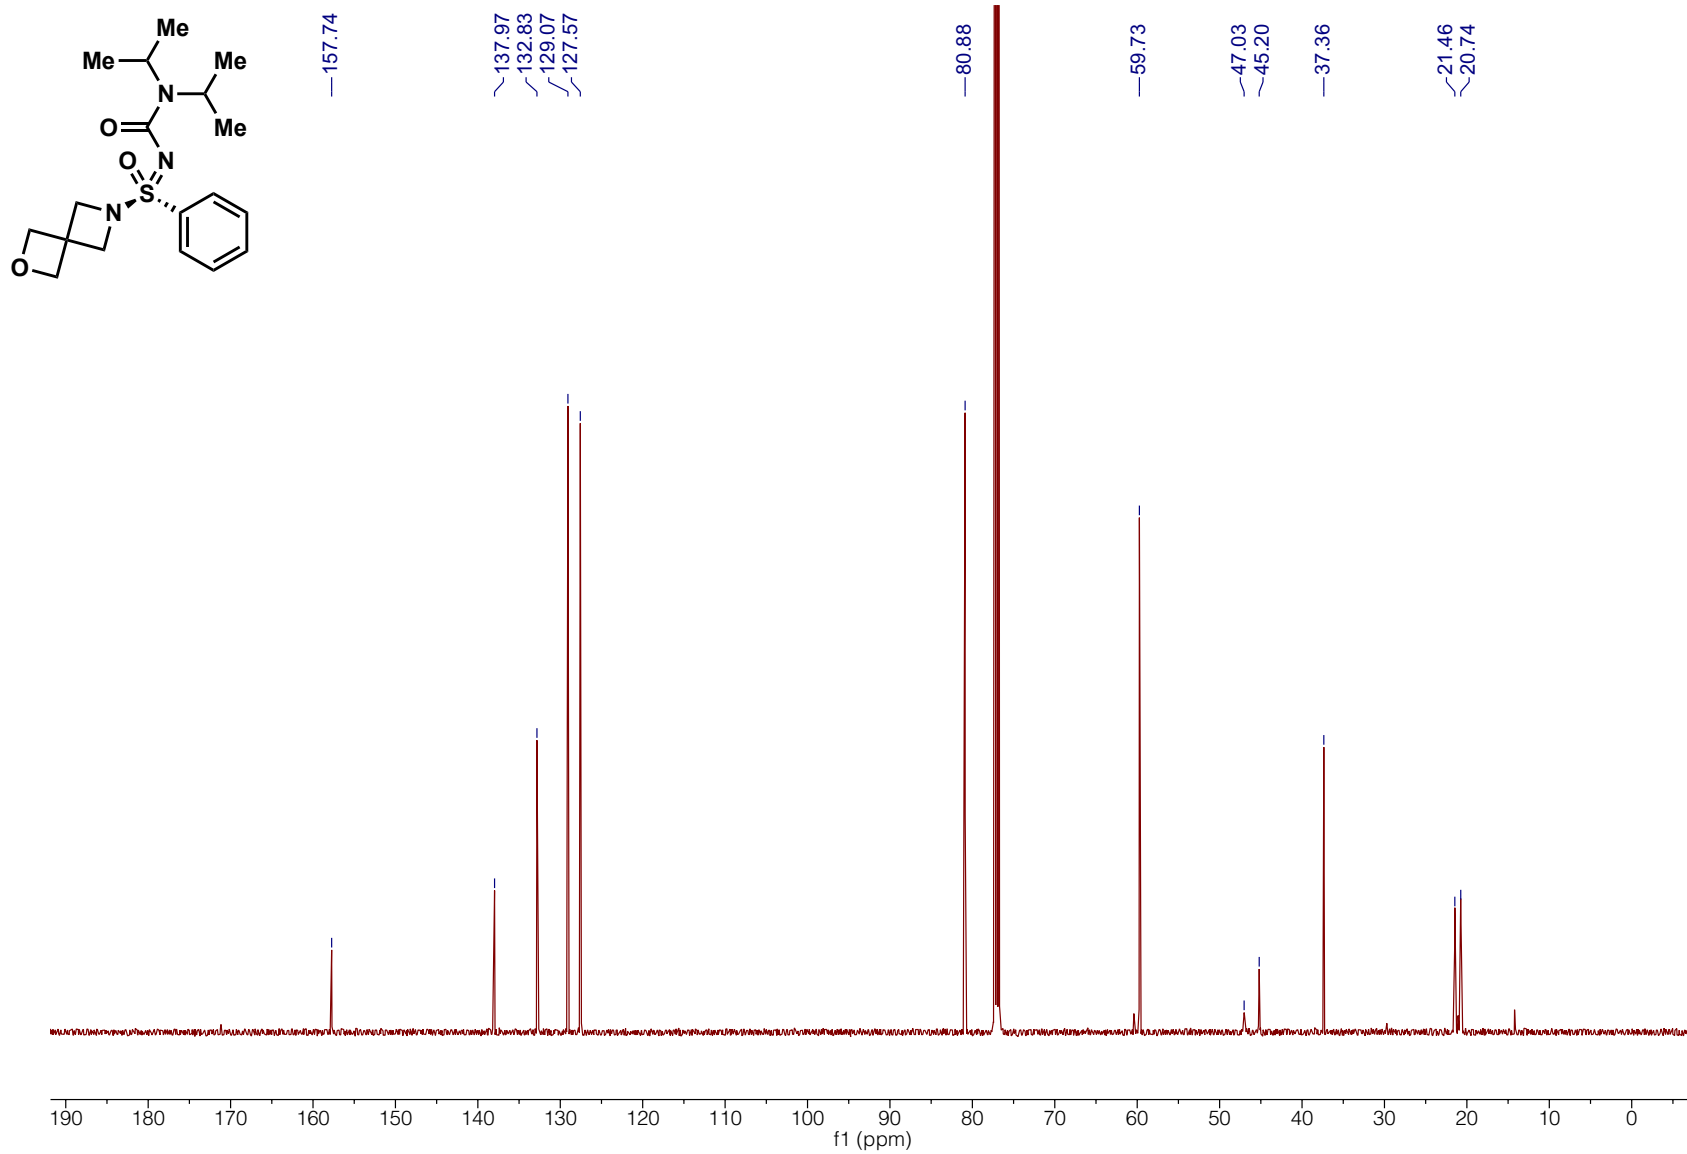

**<sup>1</sup>H NMR of compound 8o:**

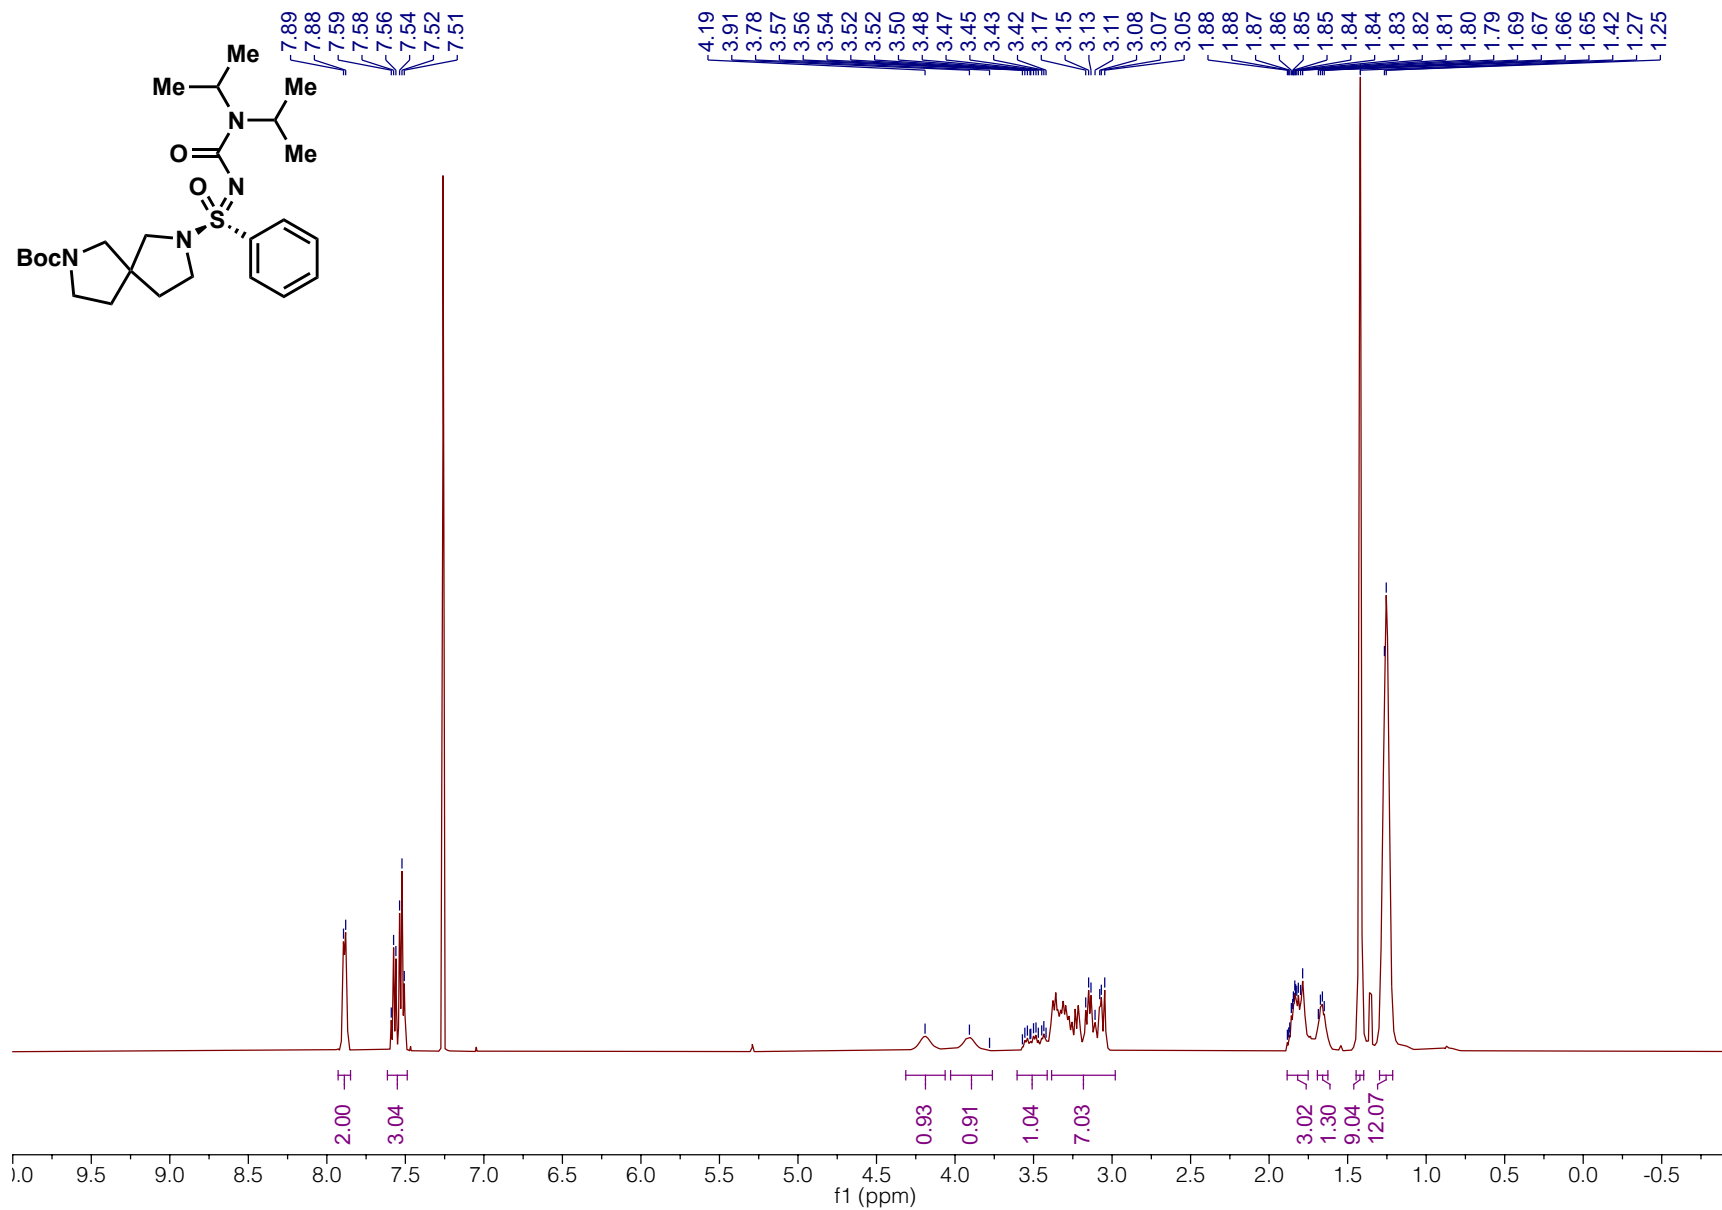

**$^{13}\text{C}$  NMR of compound 8o:**

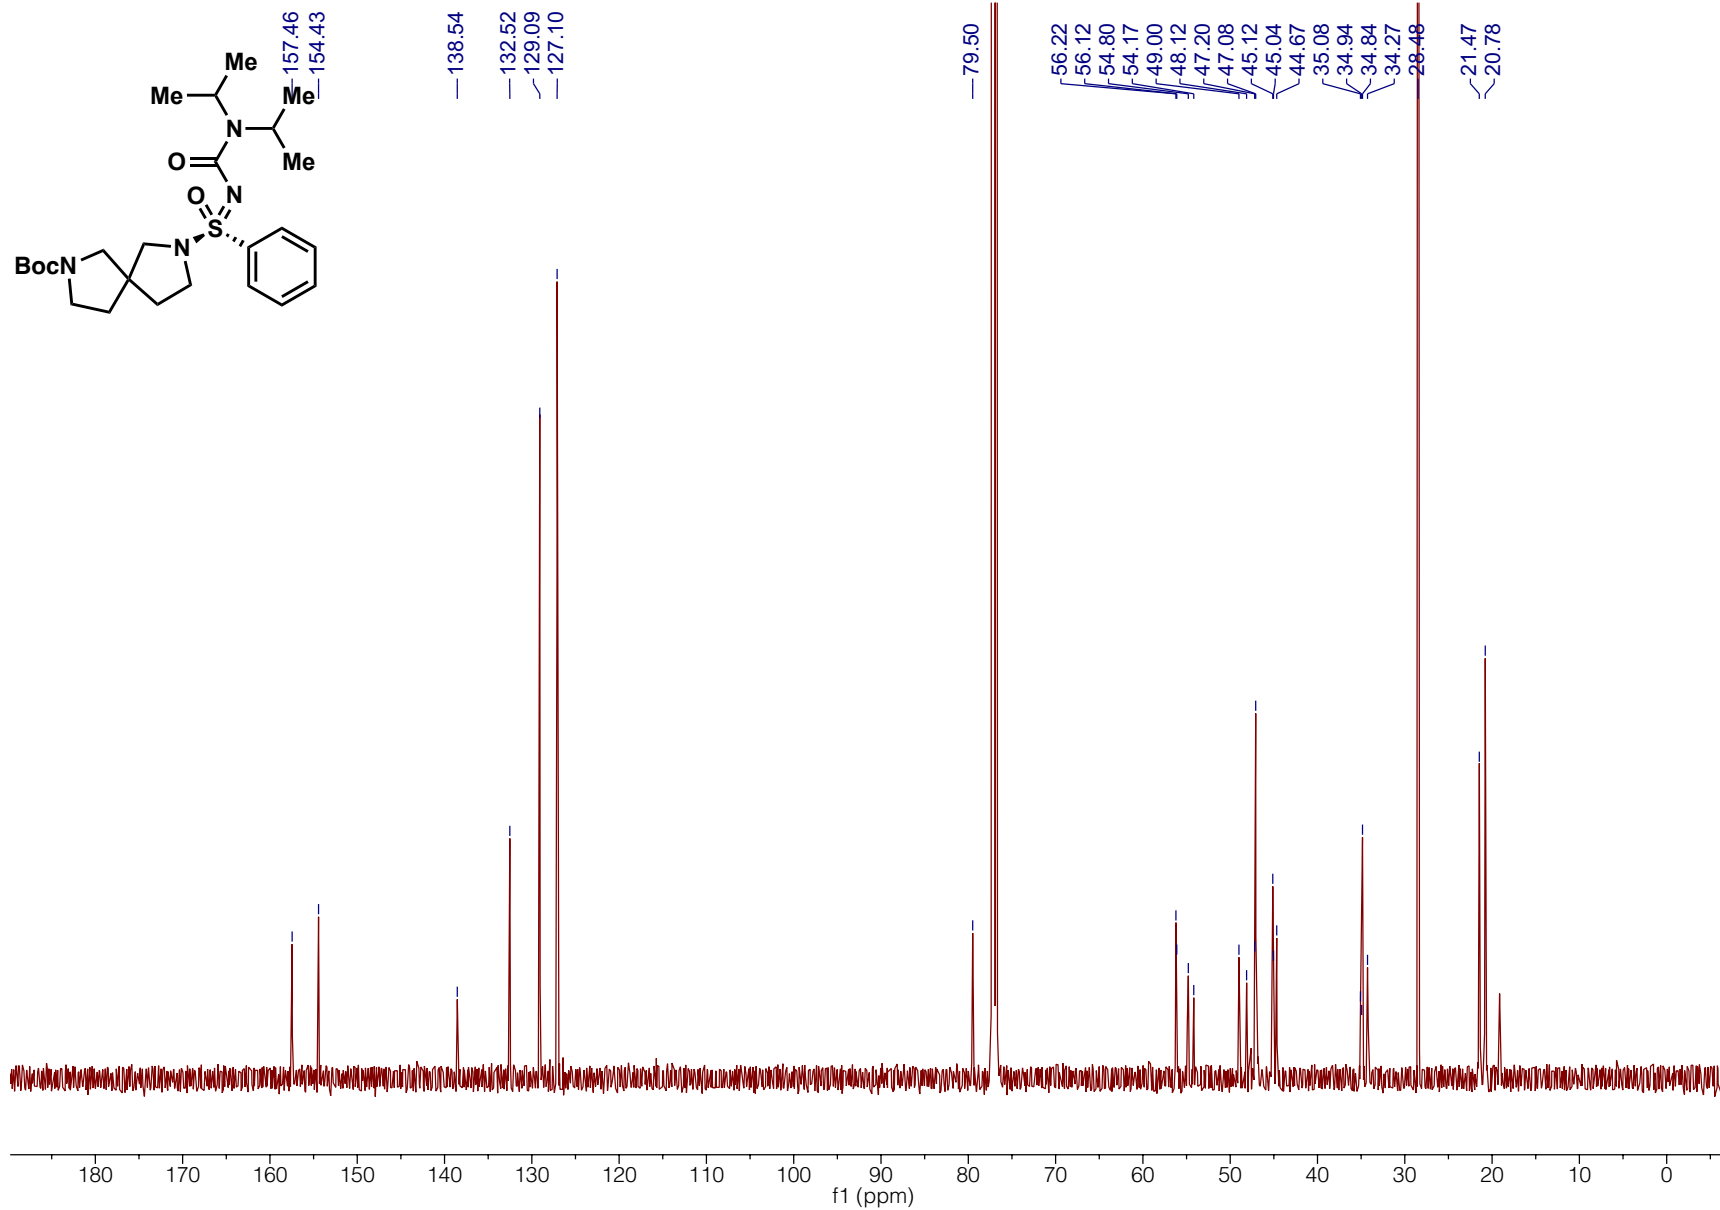

**<sup>1</sup>H NMR of compound 8p:**

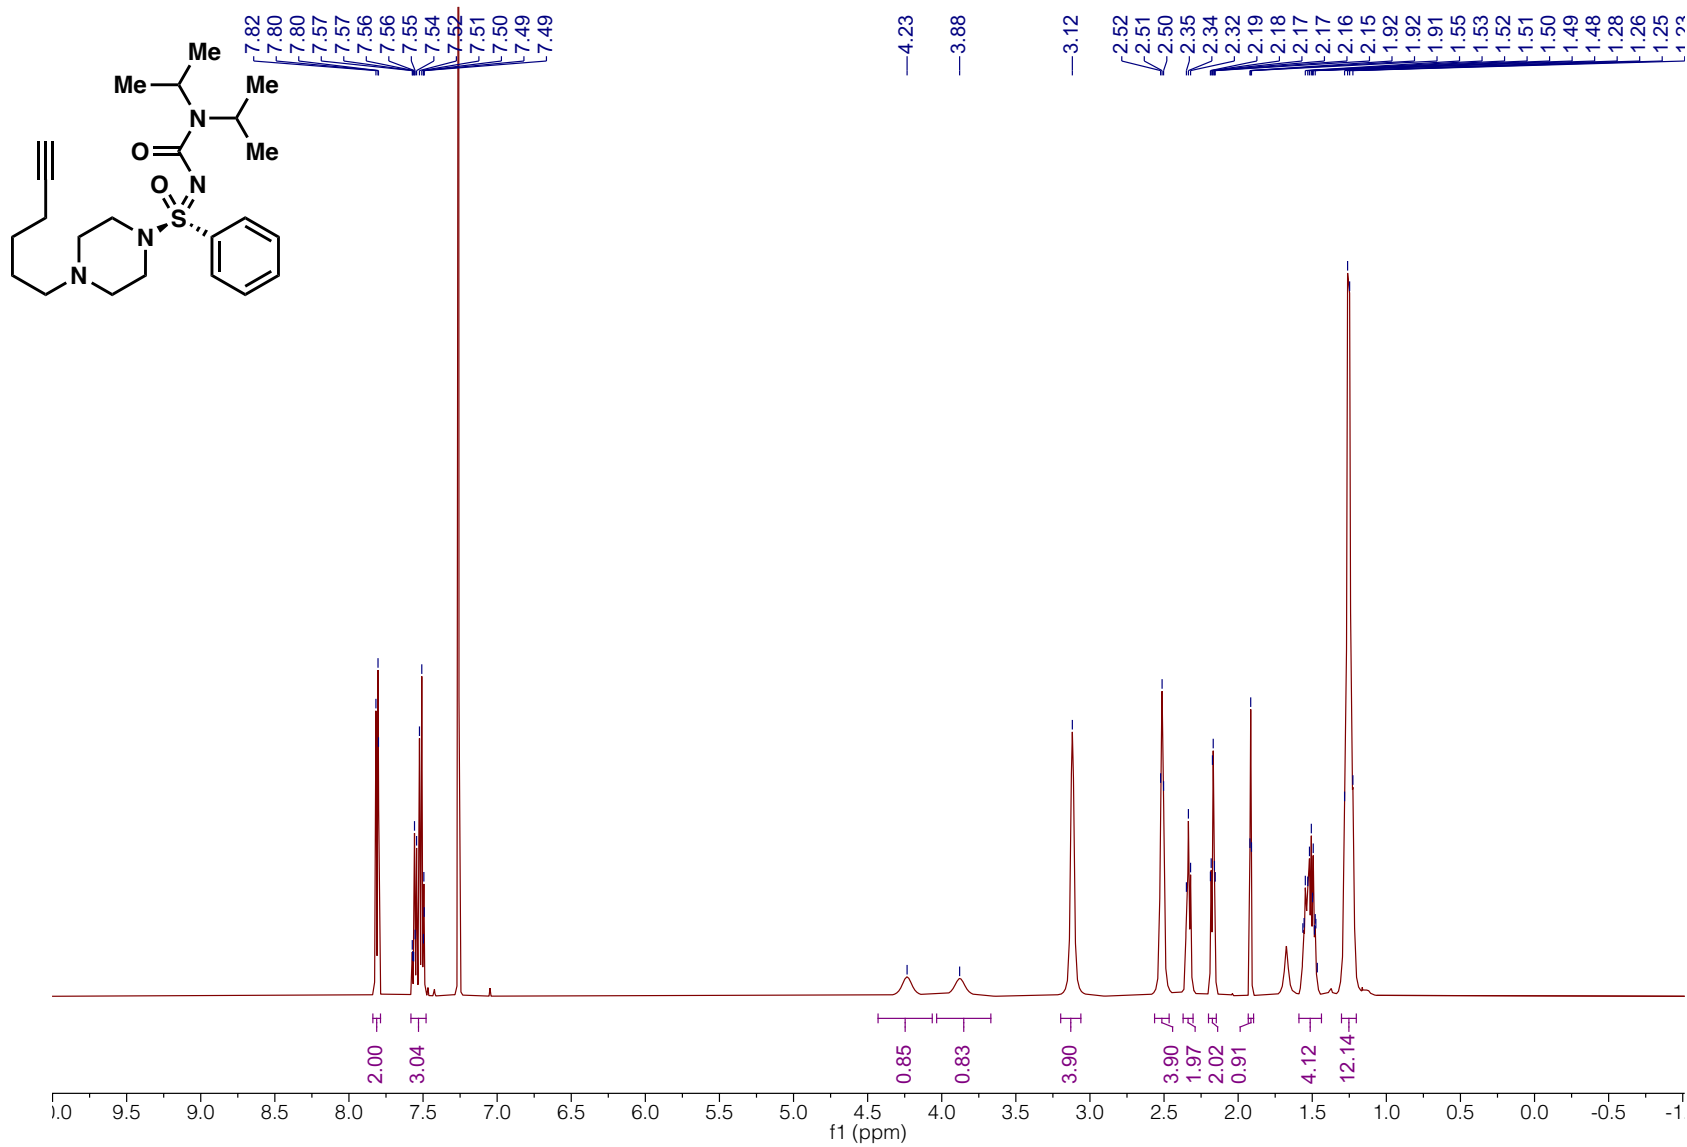

**<sup>13</sup>C NMR of compound 8p:**

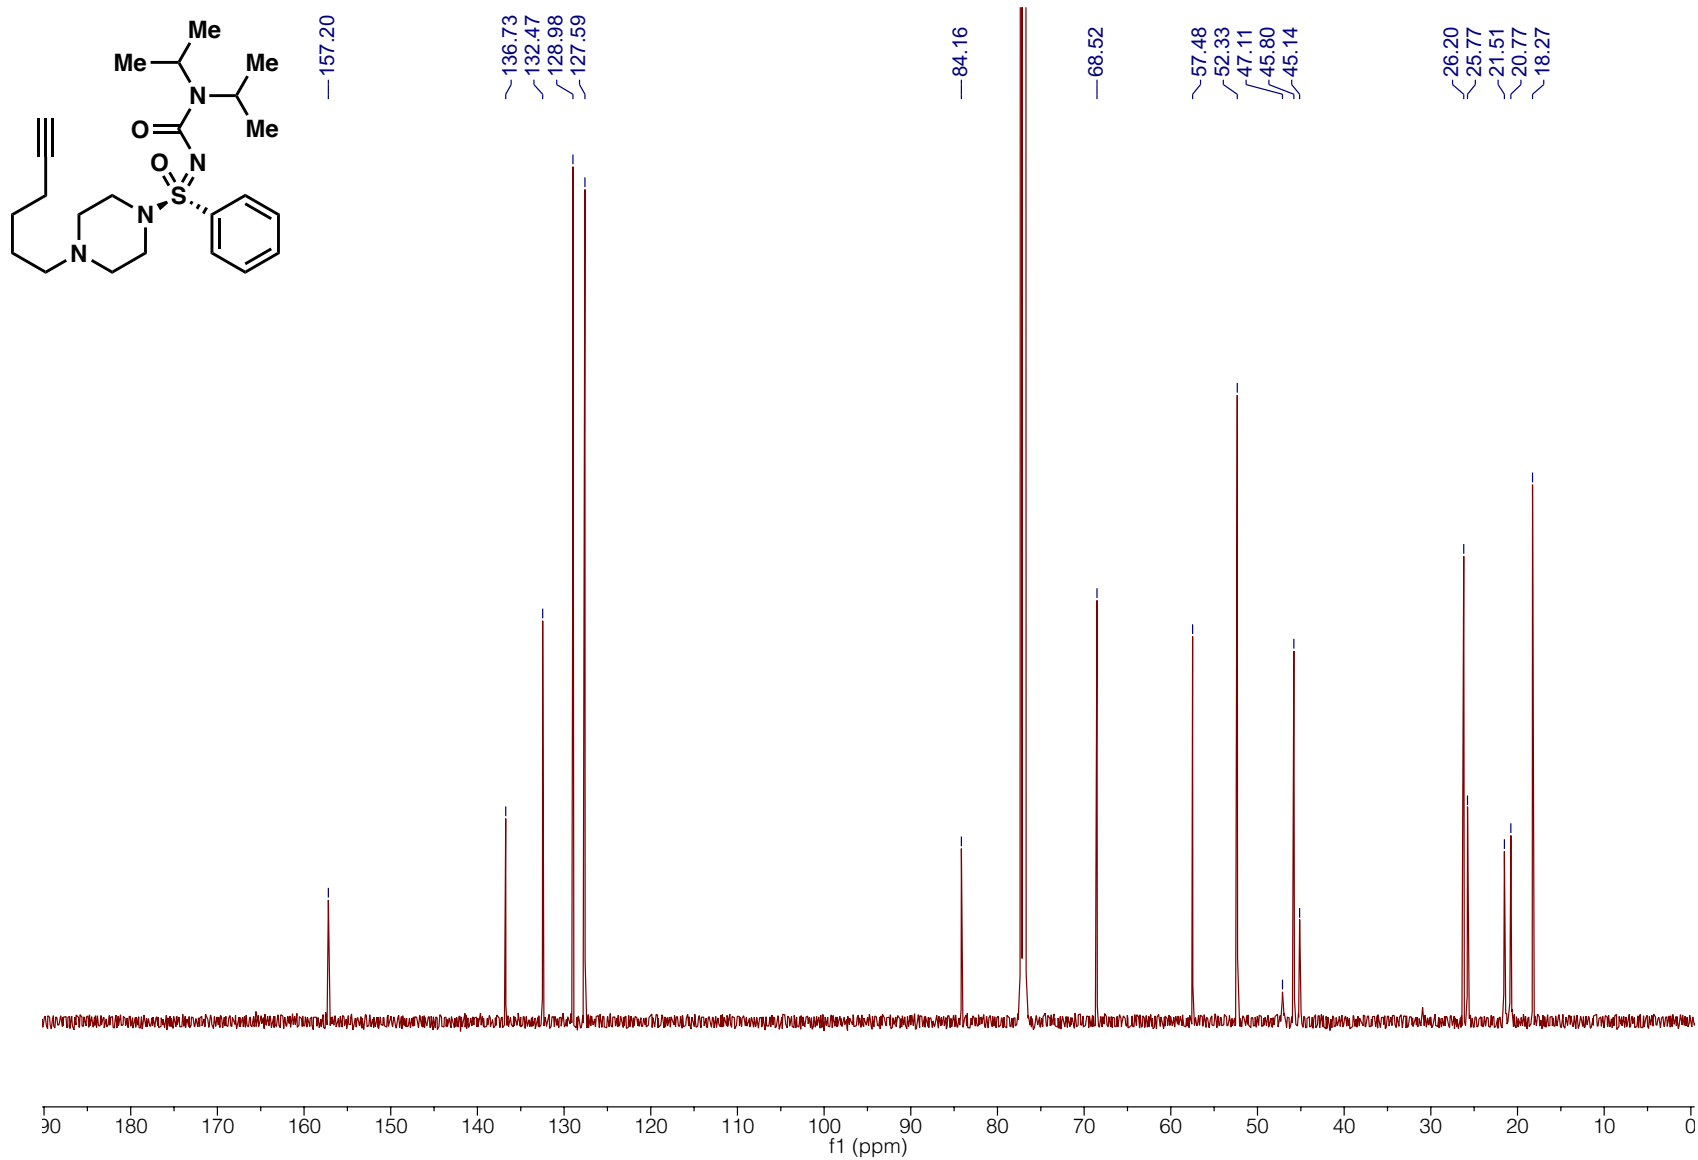

**<sup>1</sup>H NMR of compound 8q:**

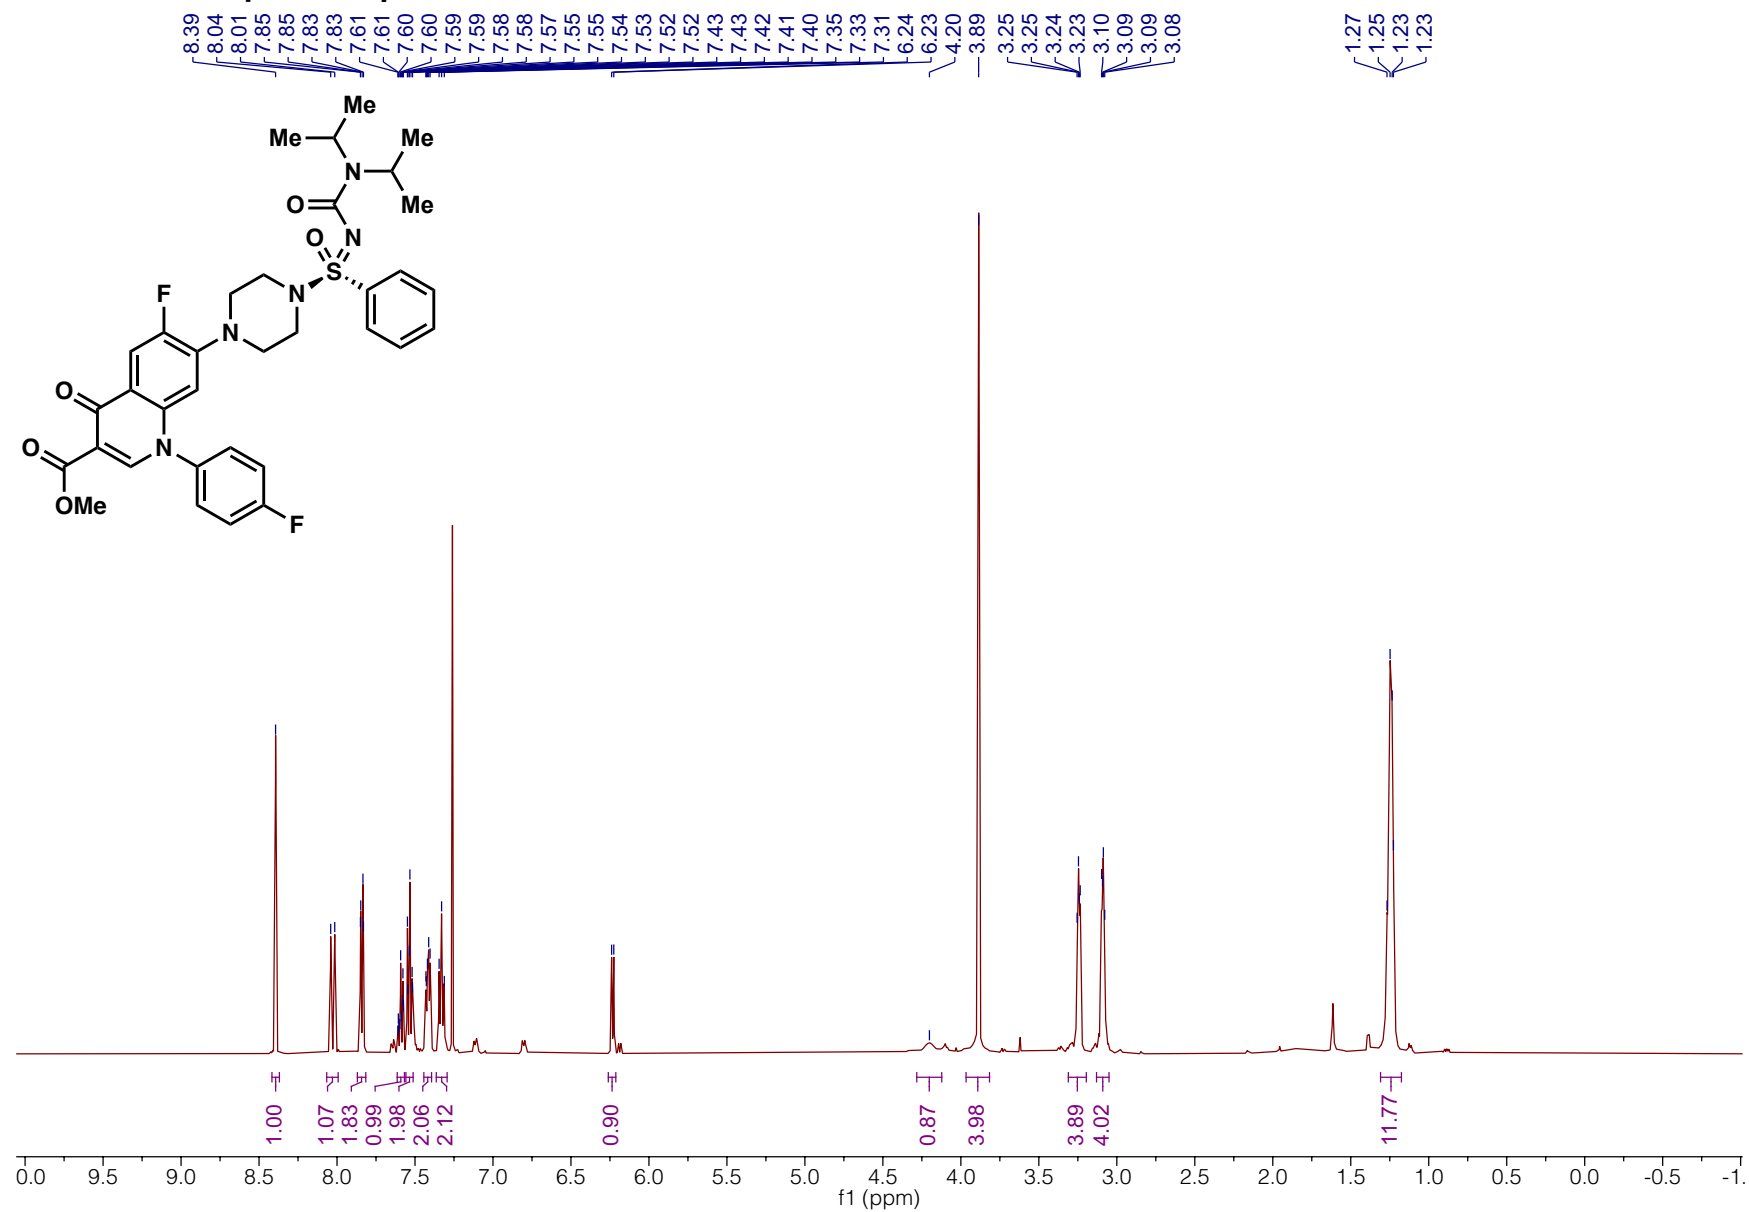

**$^{13}\text{C}$  NMR of compound 8q:**

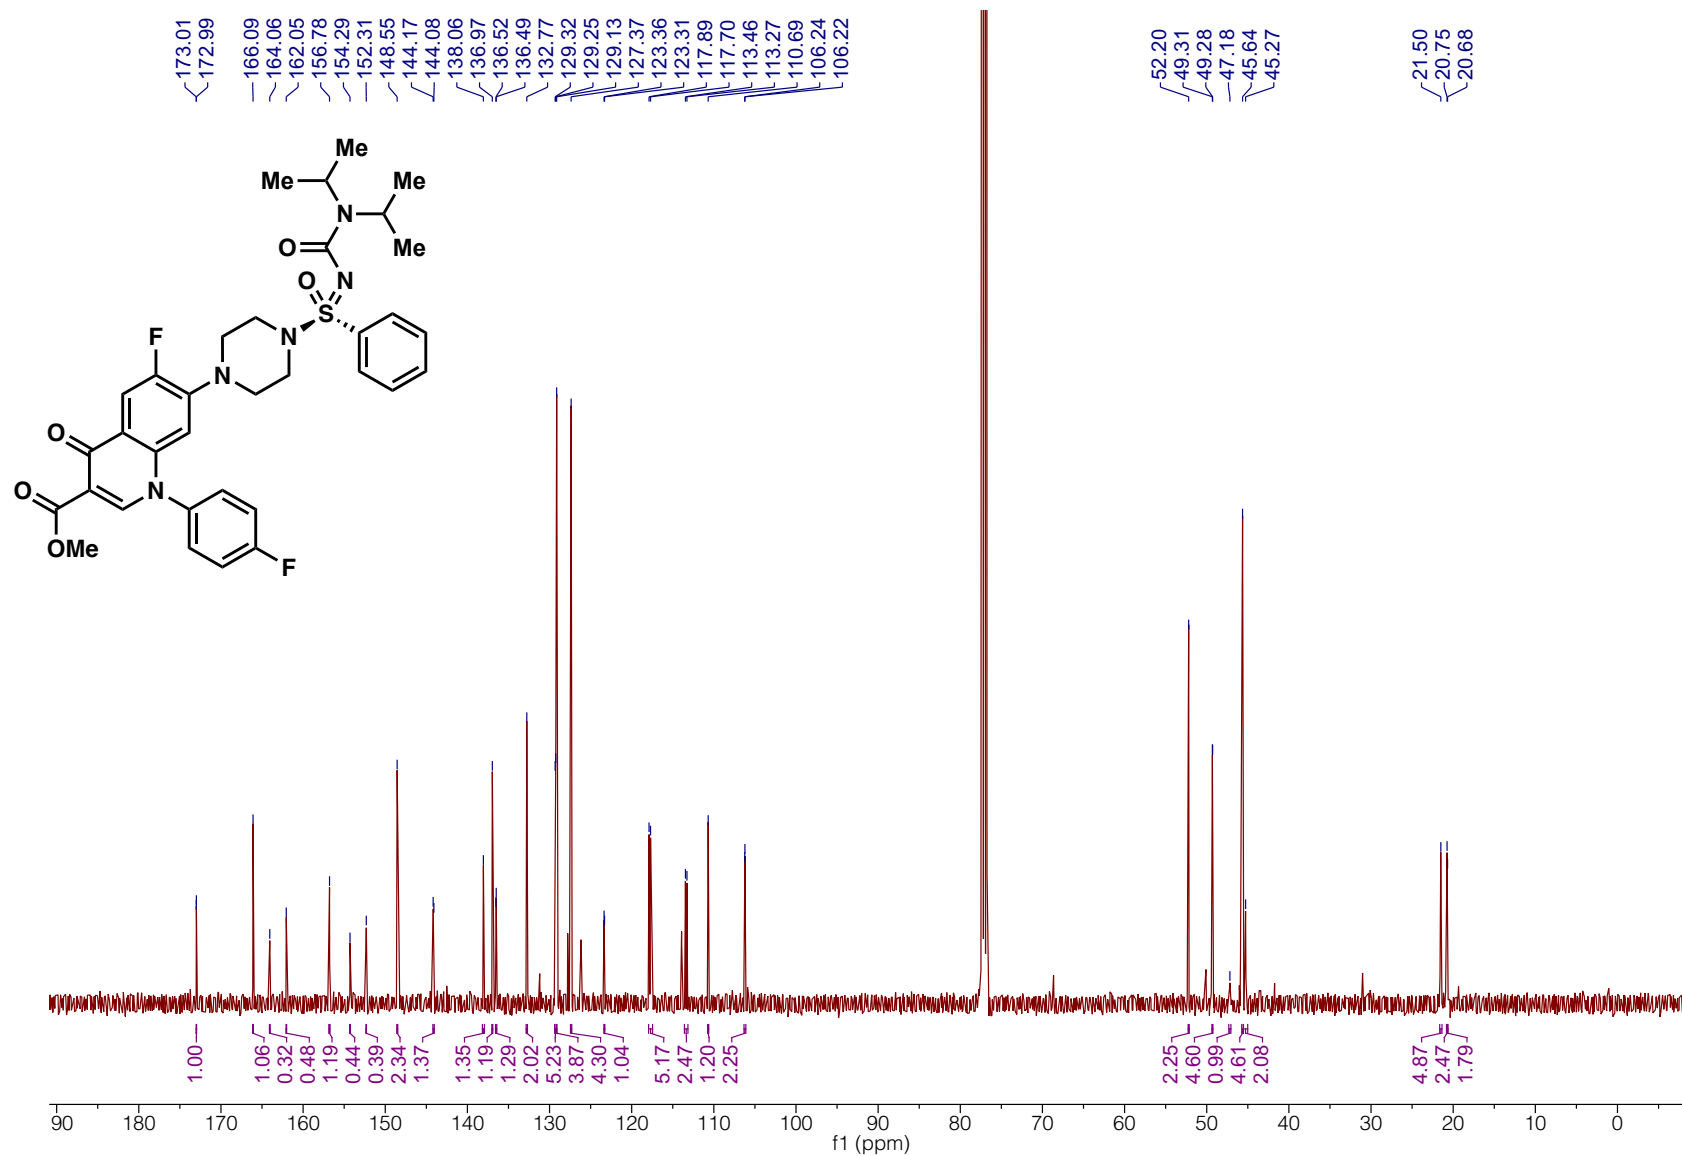

**$^{19}\text{F}$  NMR of compound 8q:**

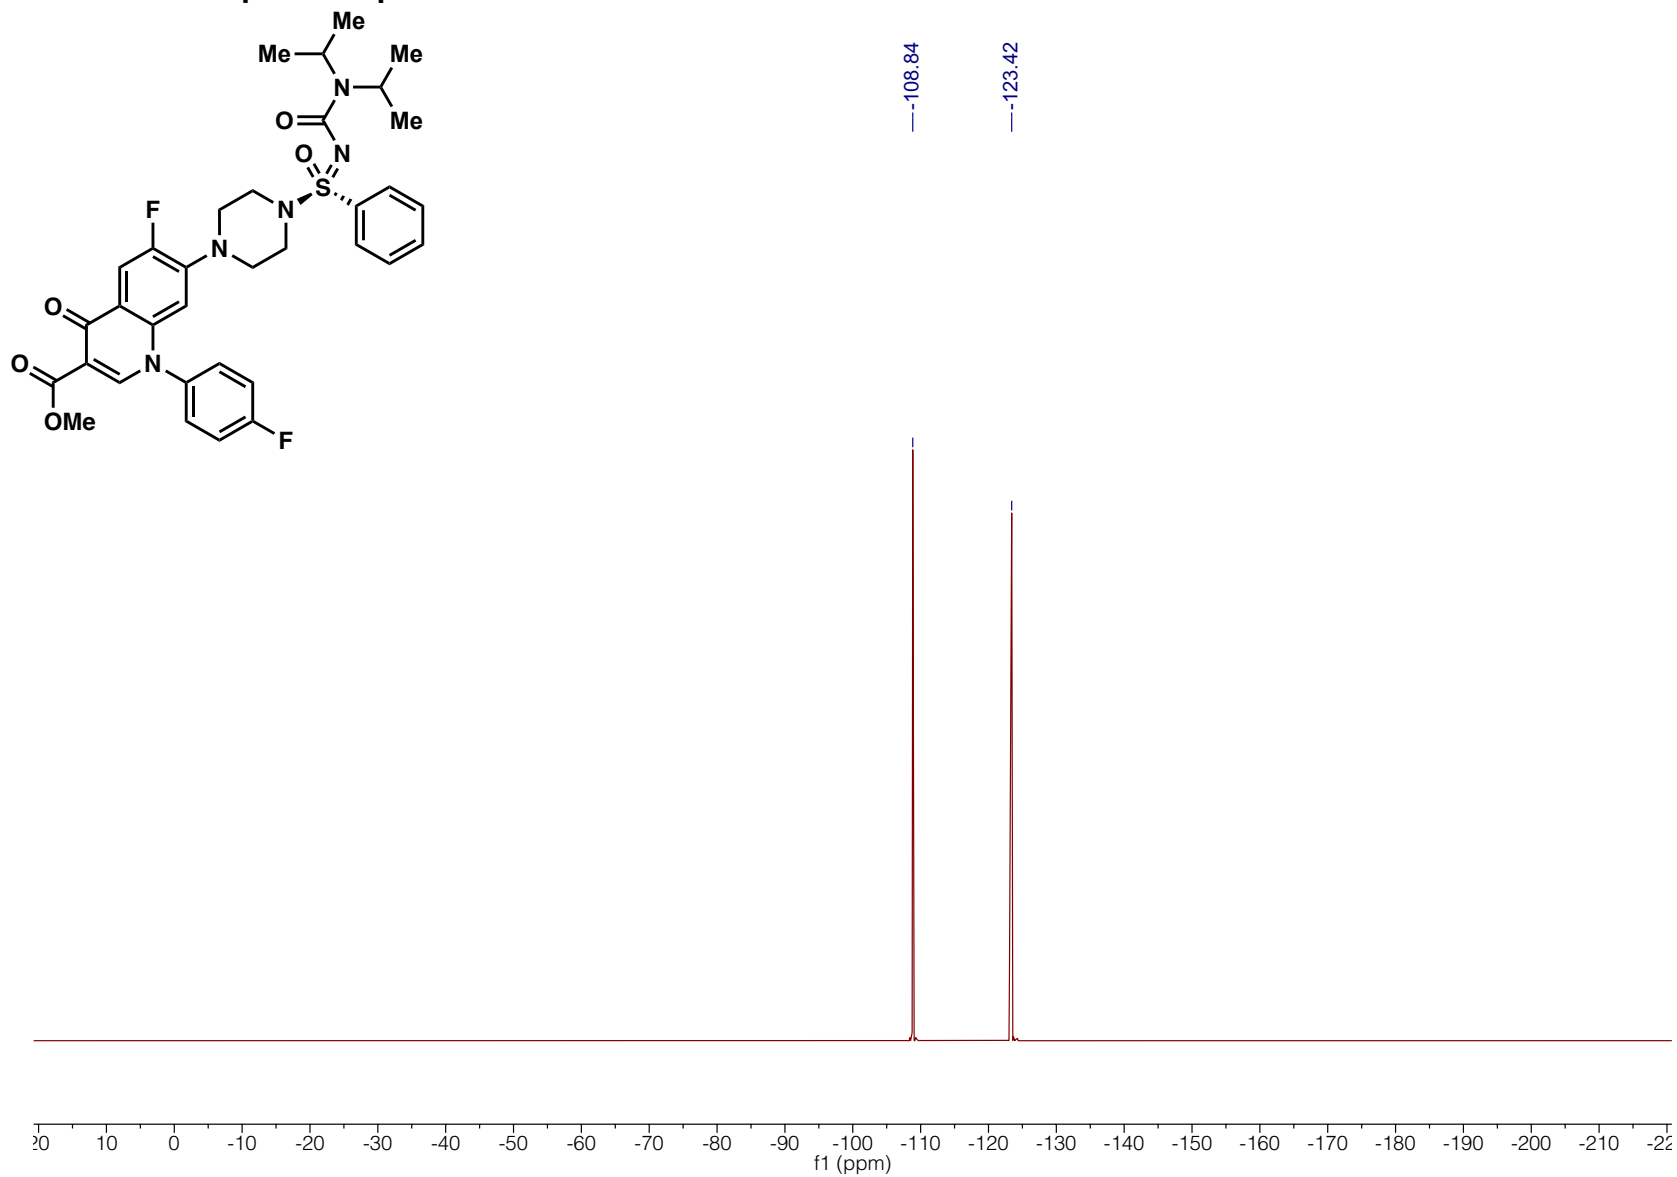

**<sup>1</sup>H NMR of compound 8r:**

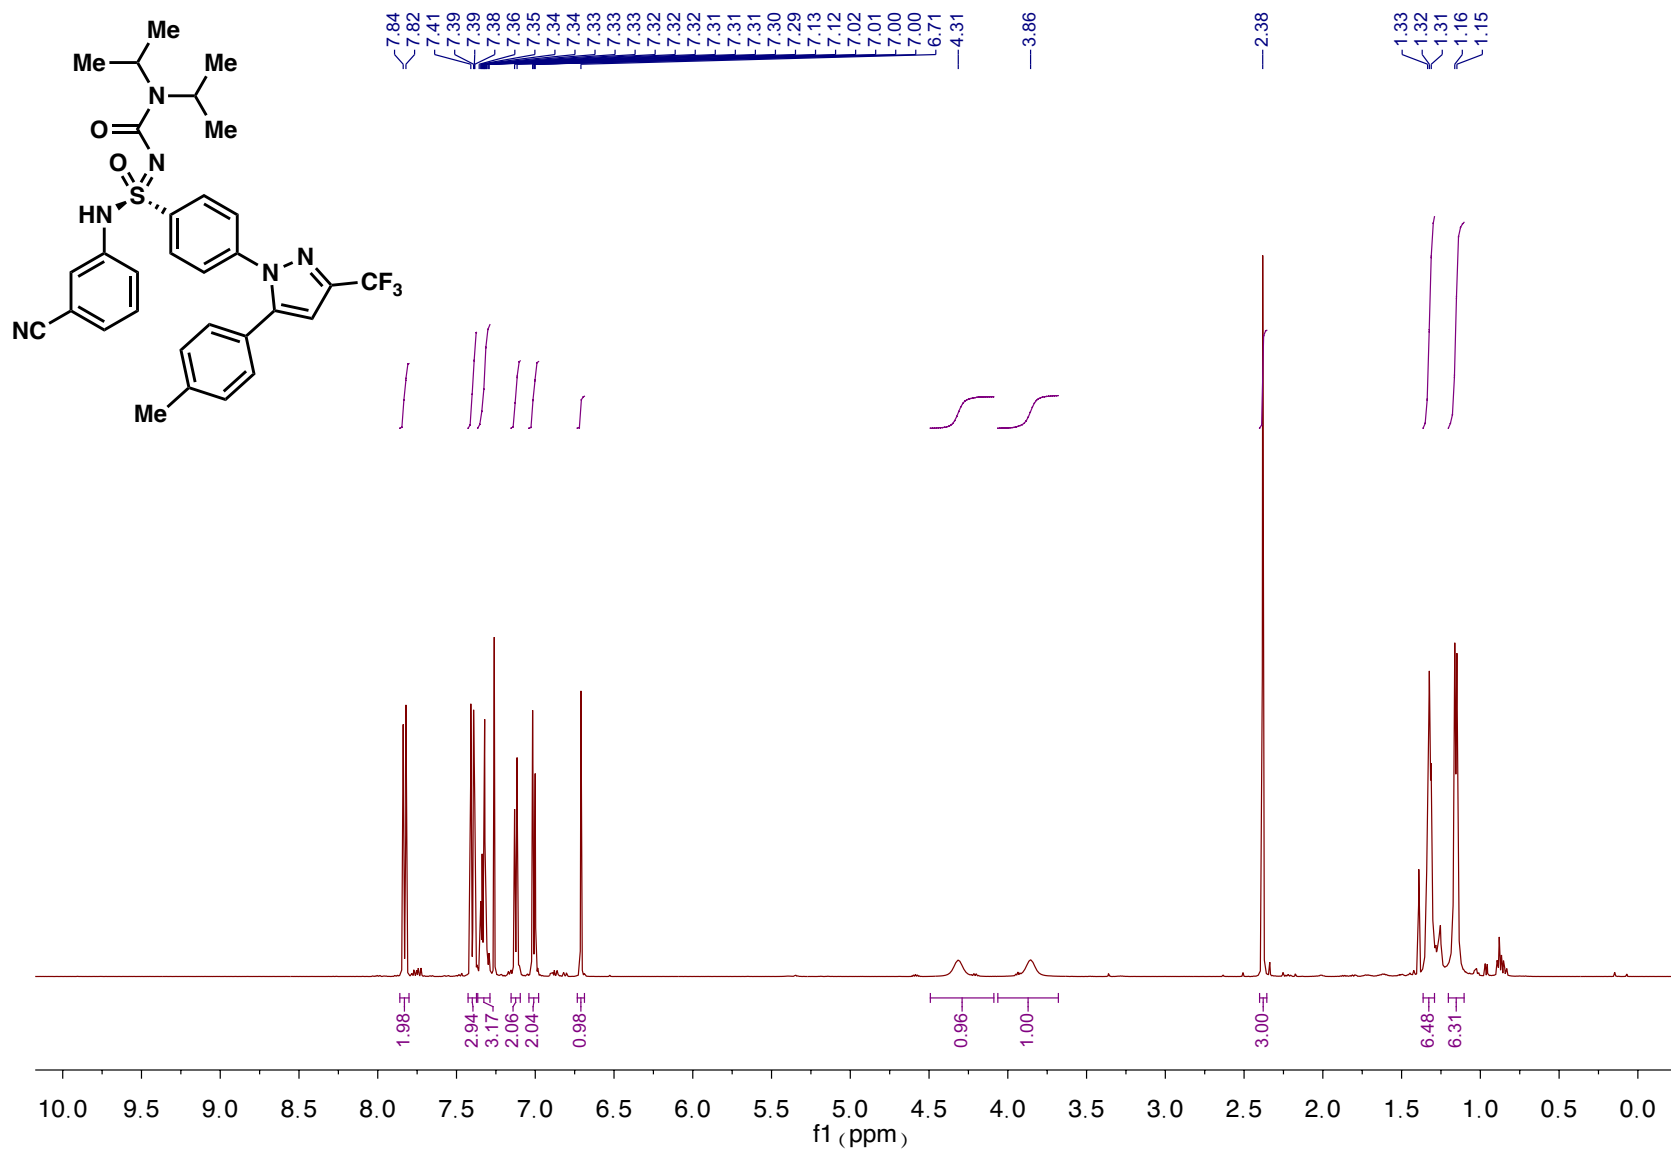

**$^{13}\text{C}$  NMR of compound 8r:**

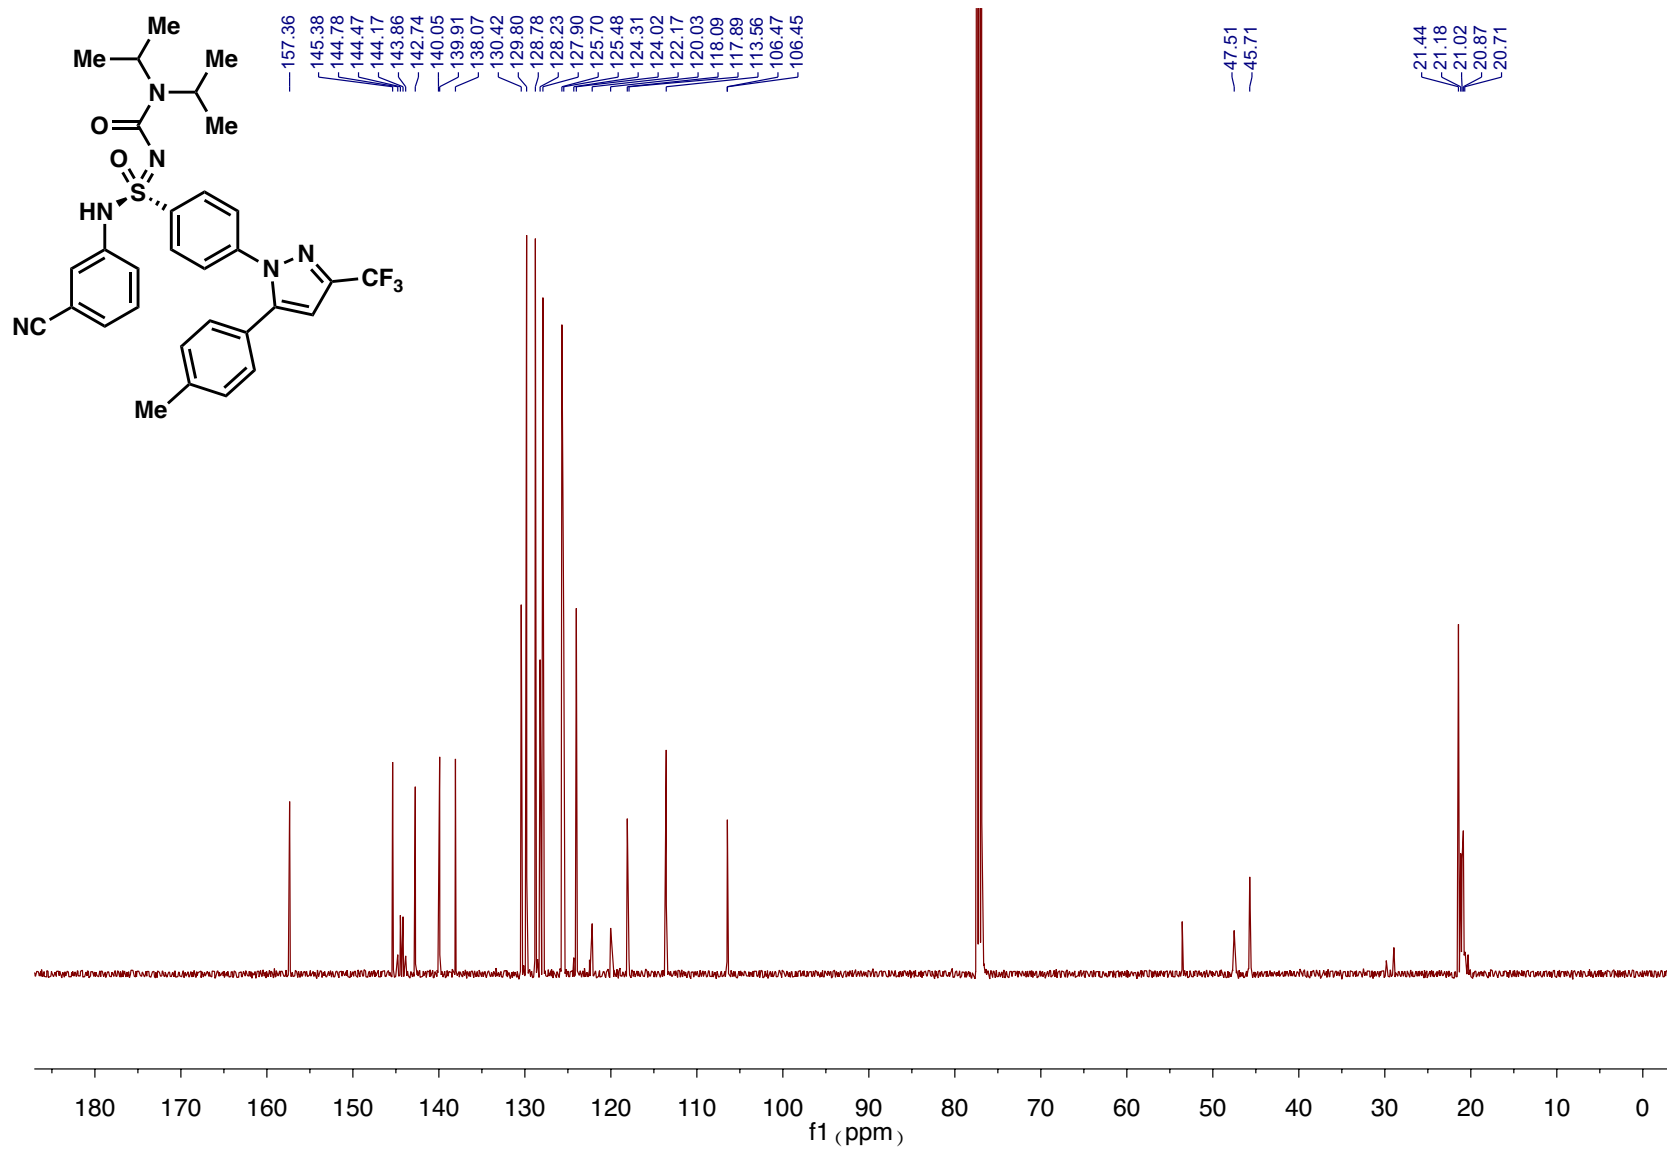

**$^{19}\text{F}$  NMR of compound 8r:**

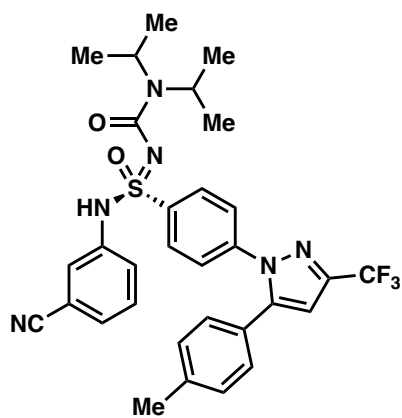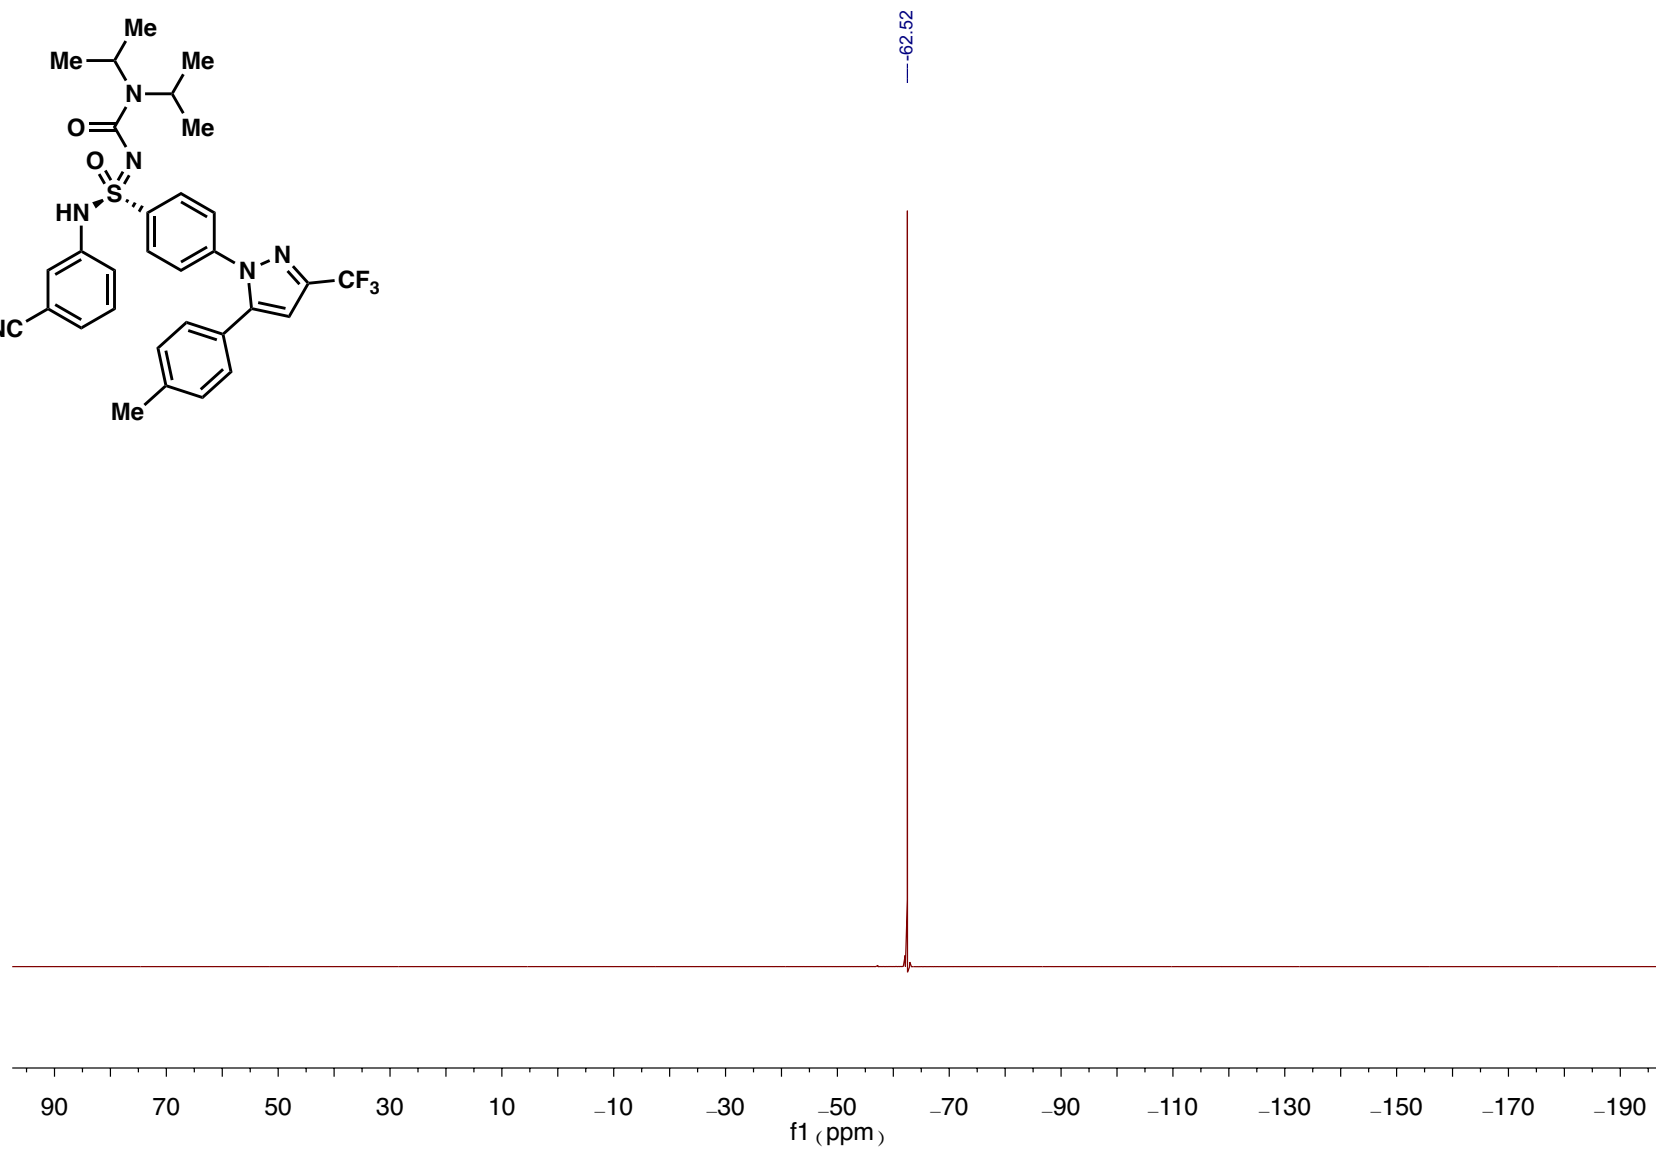

**<sup>1</sup>H NMR of compound 8s:**

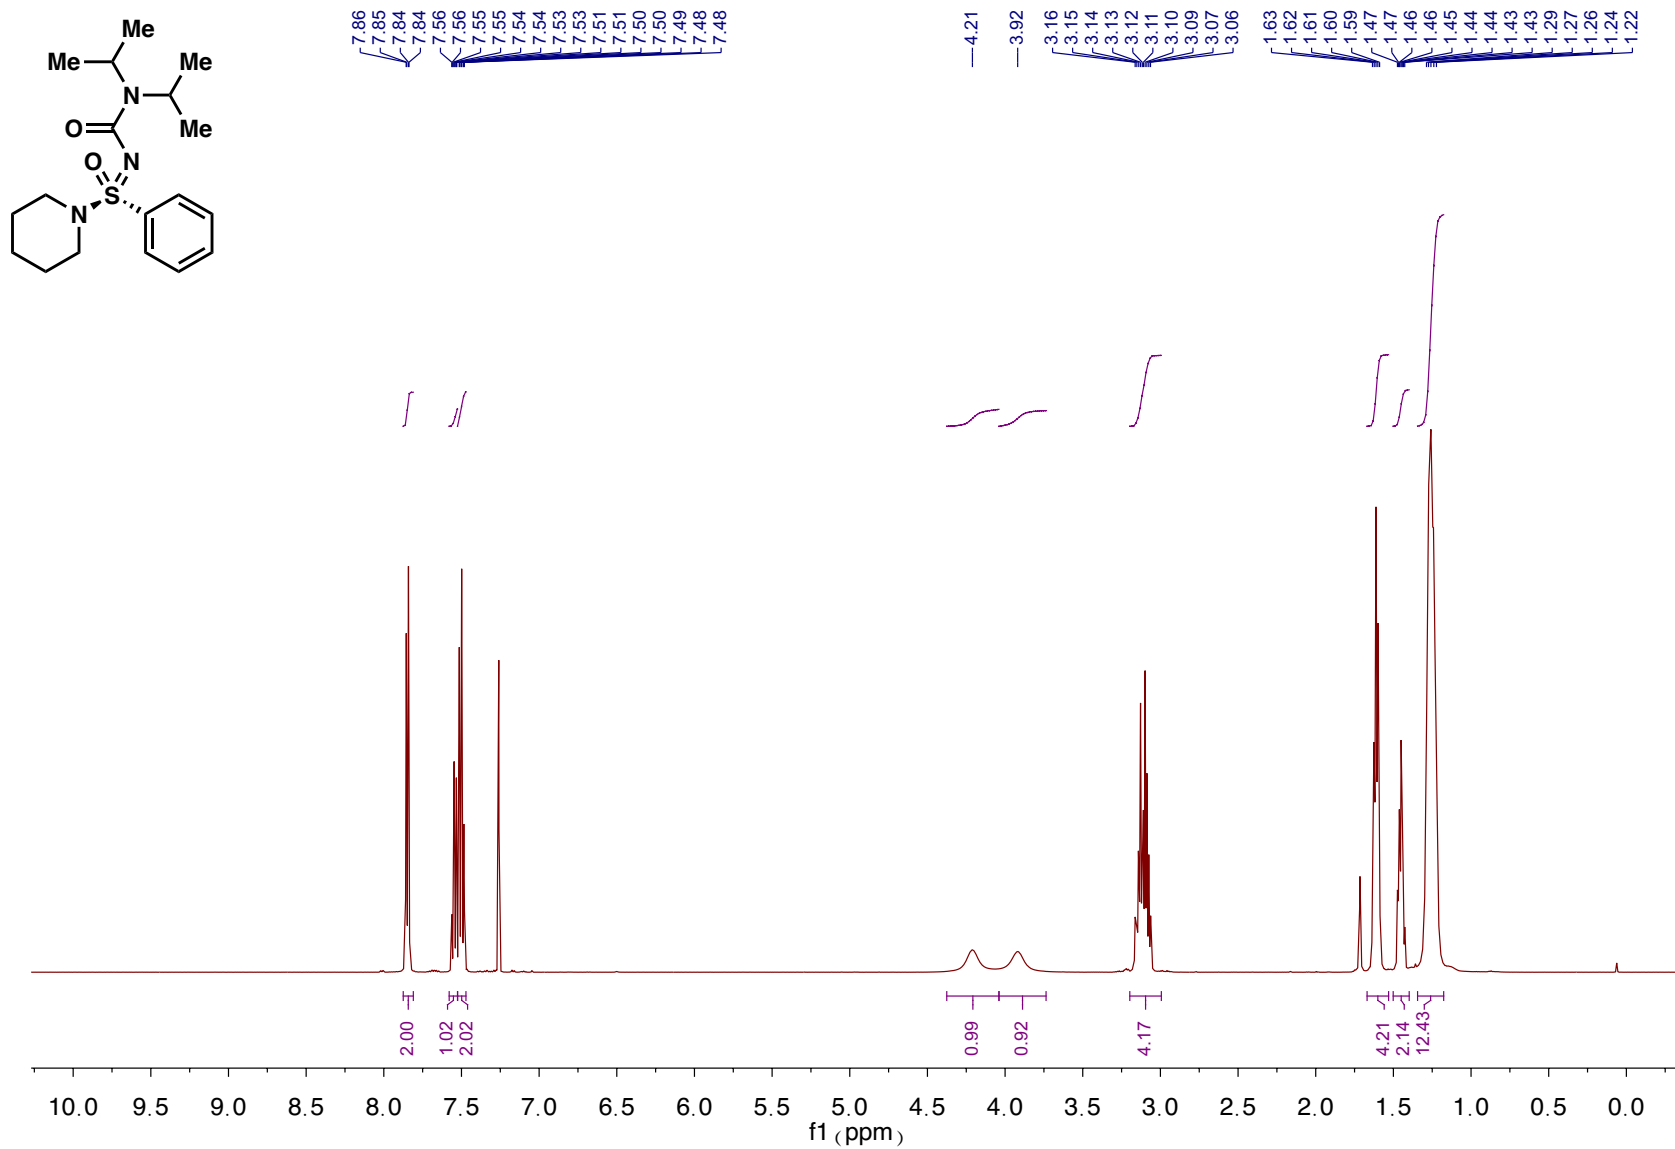

**$^{13}\text{C}$  NMR of compound 8s:**

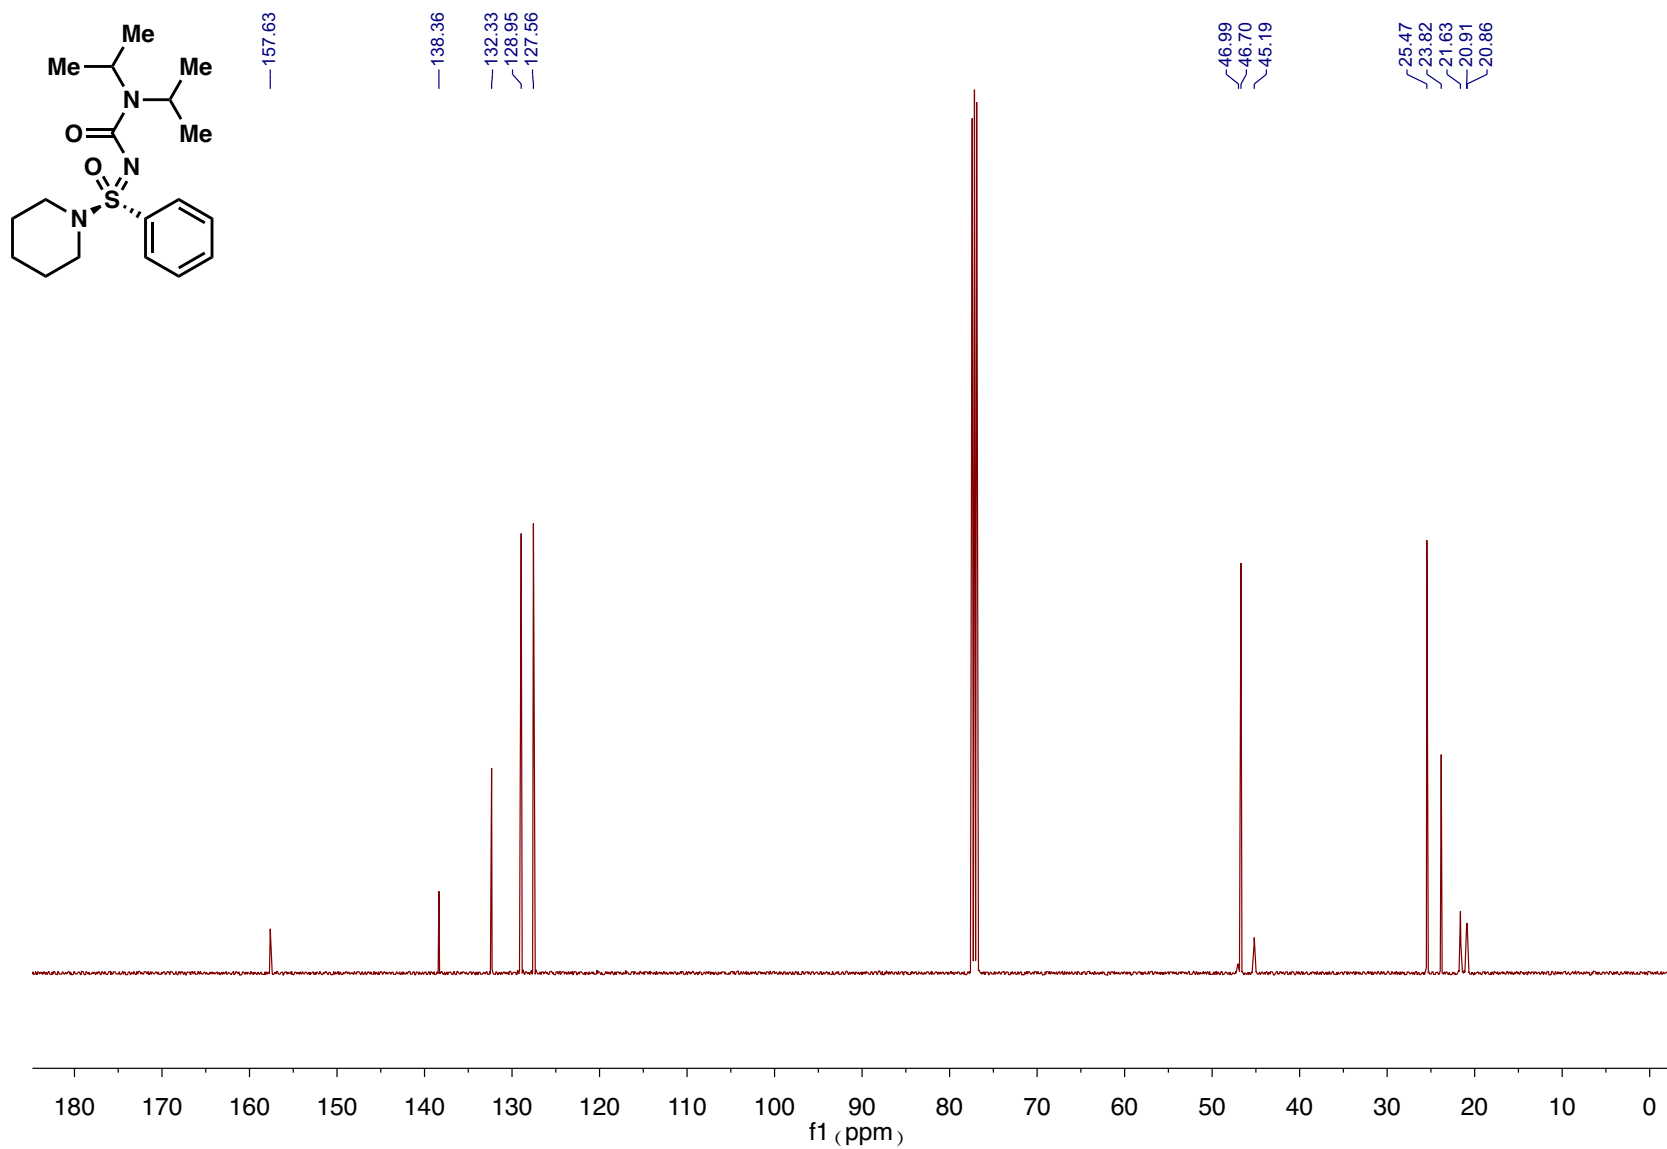

**<sup>1</sup>H NMR of compound 9a:**

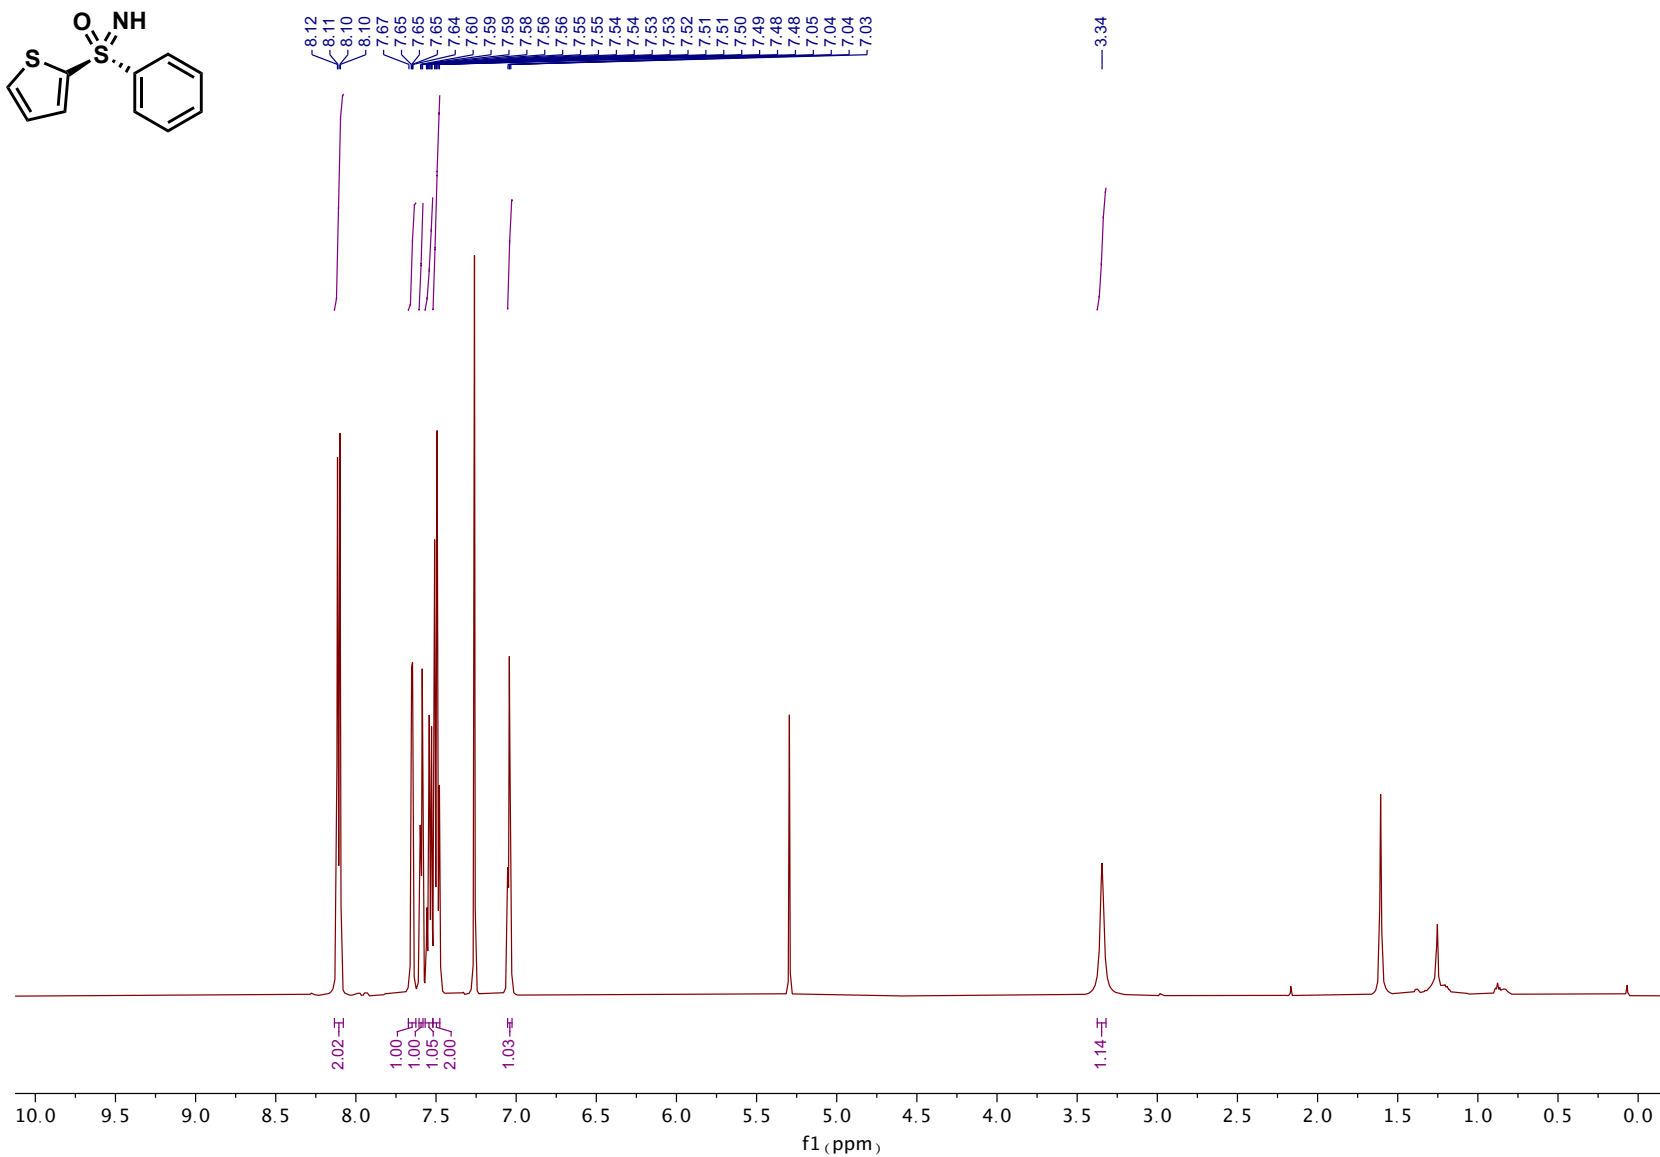

**$^{13}\text{C}$  NMR of compound 9a:**

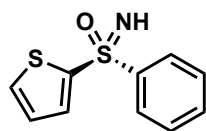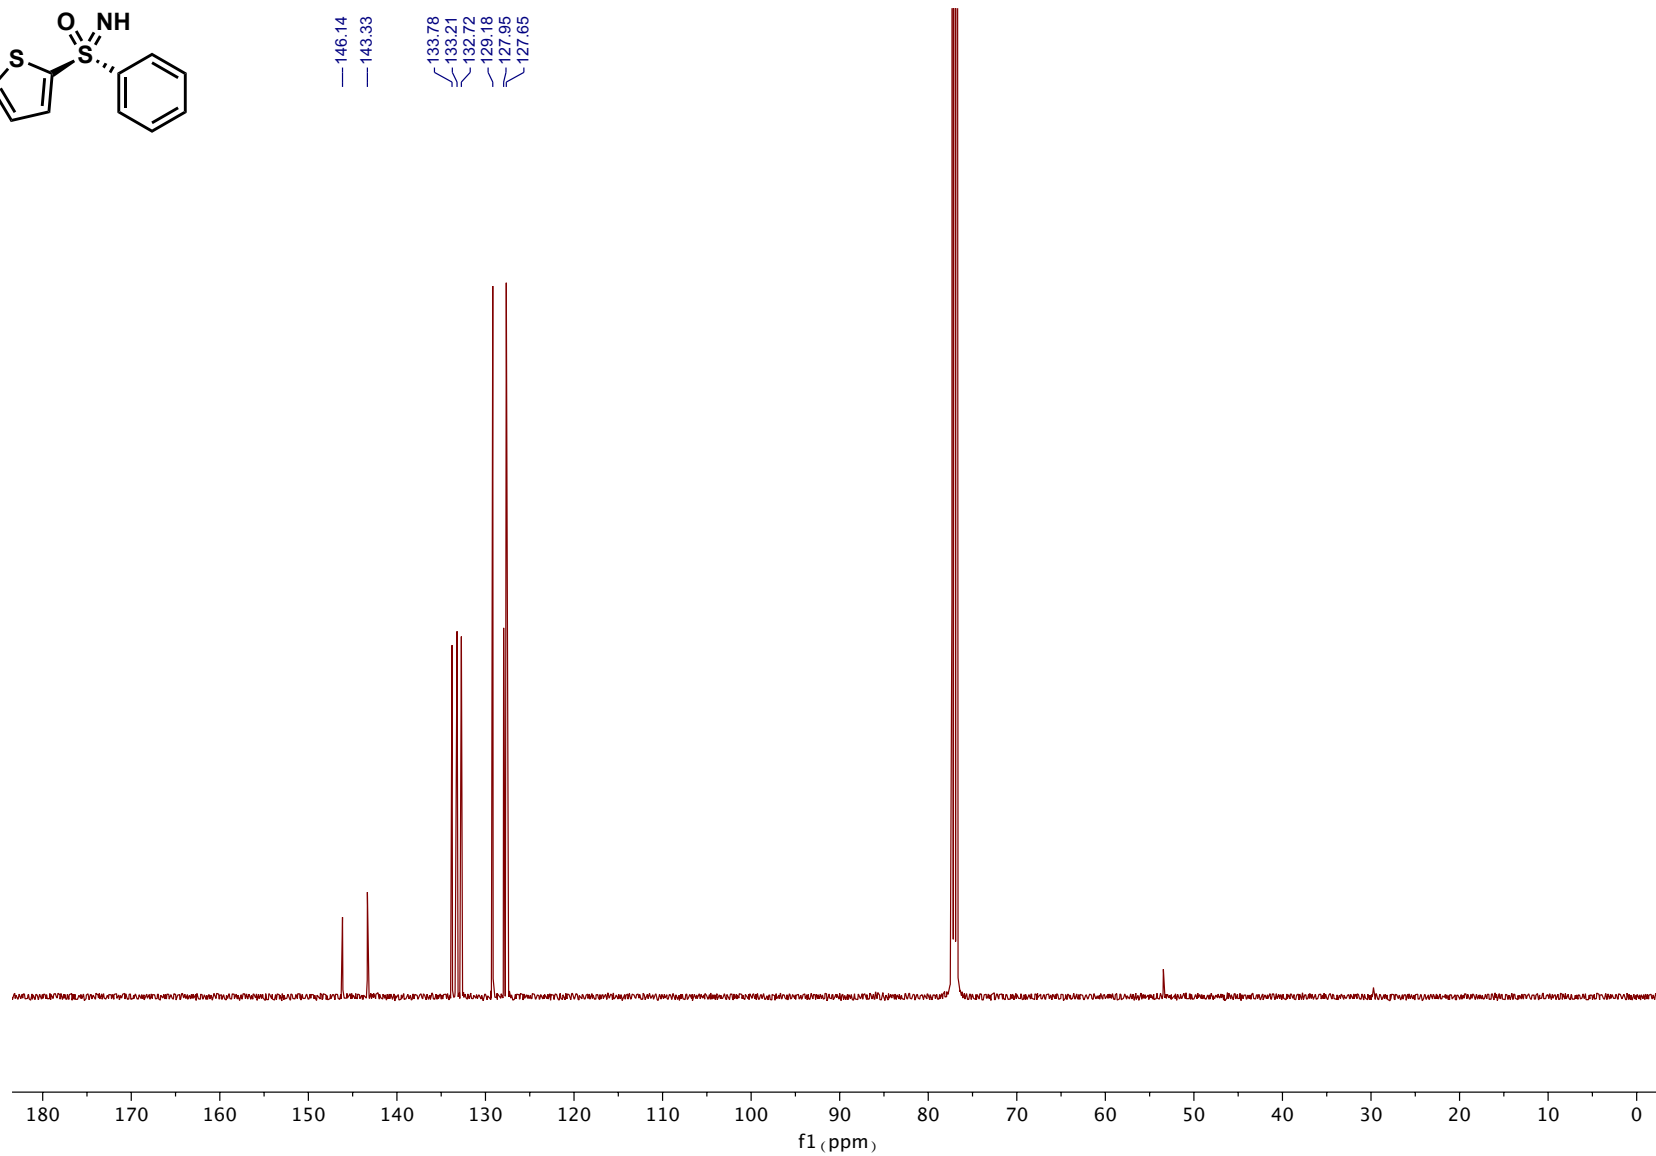

**<sup>1</sup>H NMR of compound 9b:**

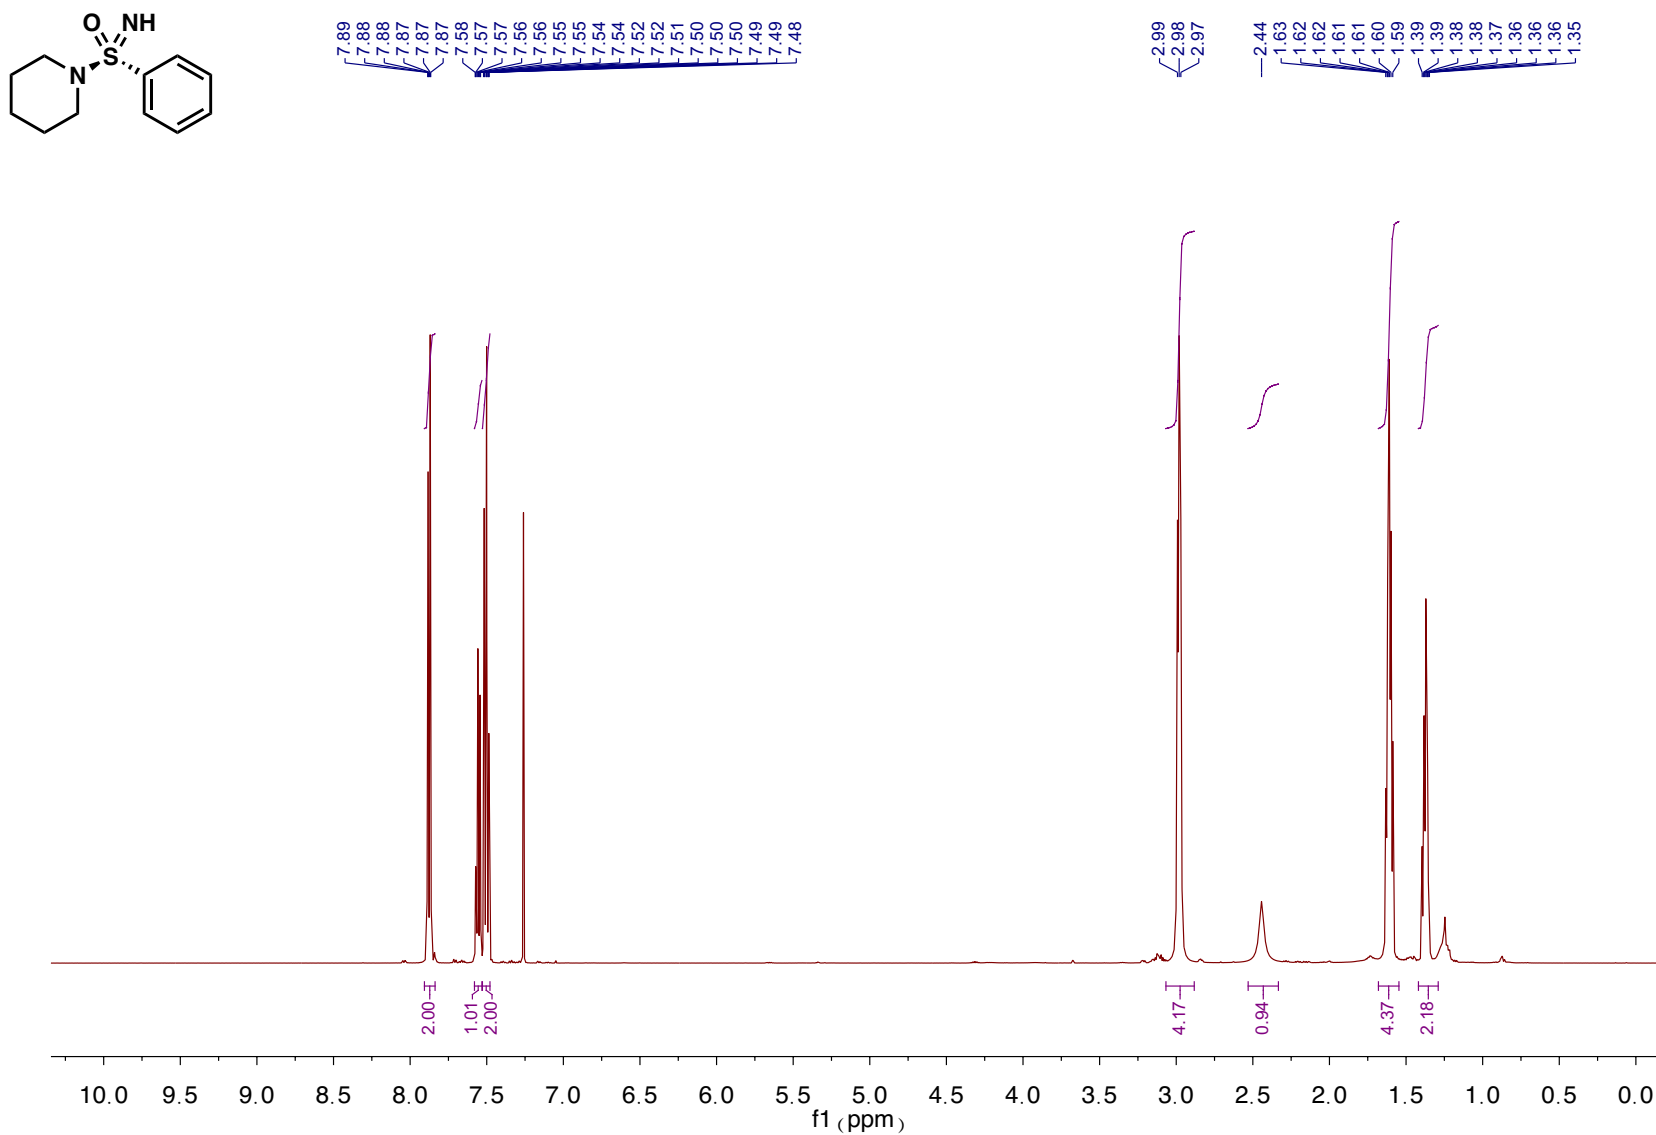

**$^{13}\text{C}$  NMR of compound 9b:**

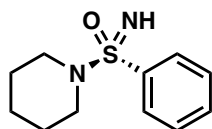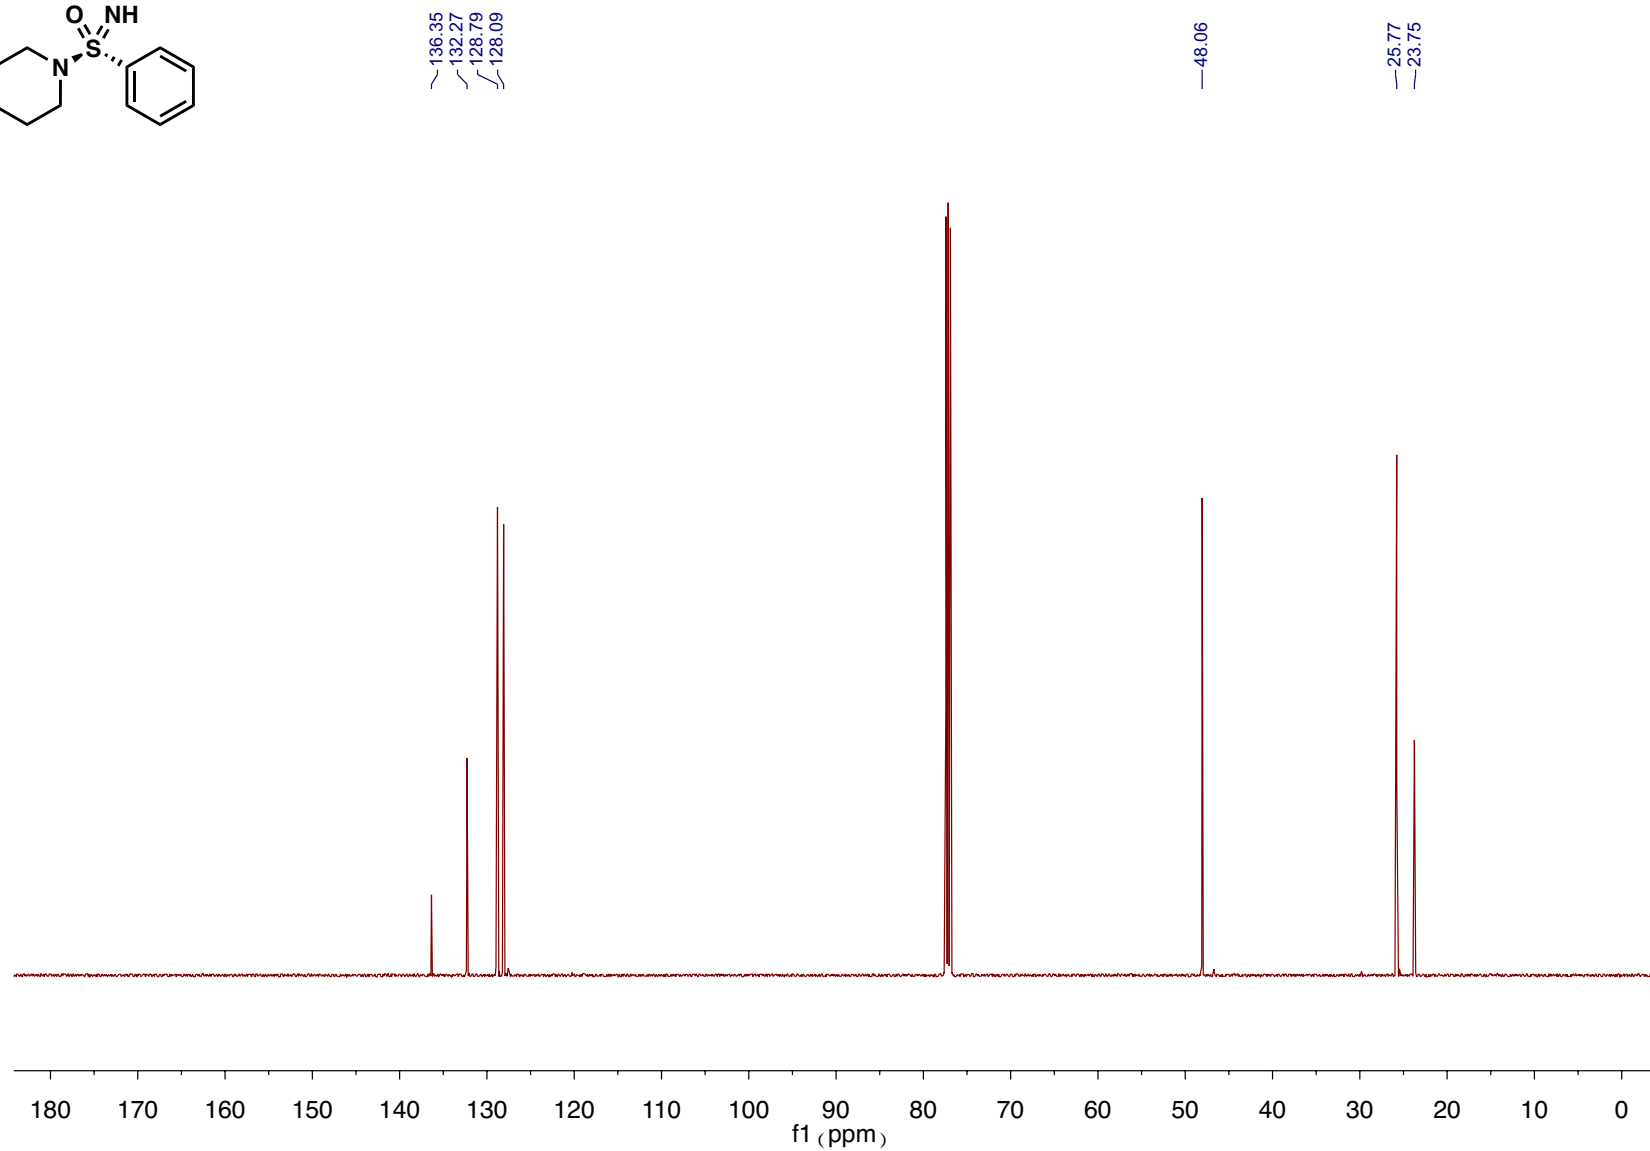

**<sup>1</sup>H NMR of compound 10b:**

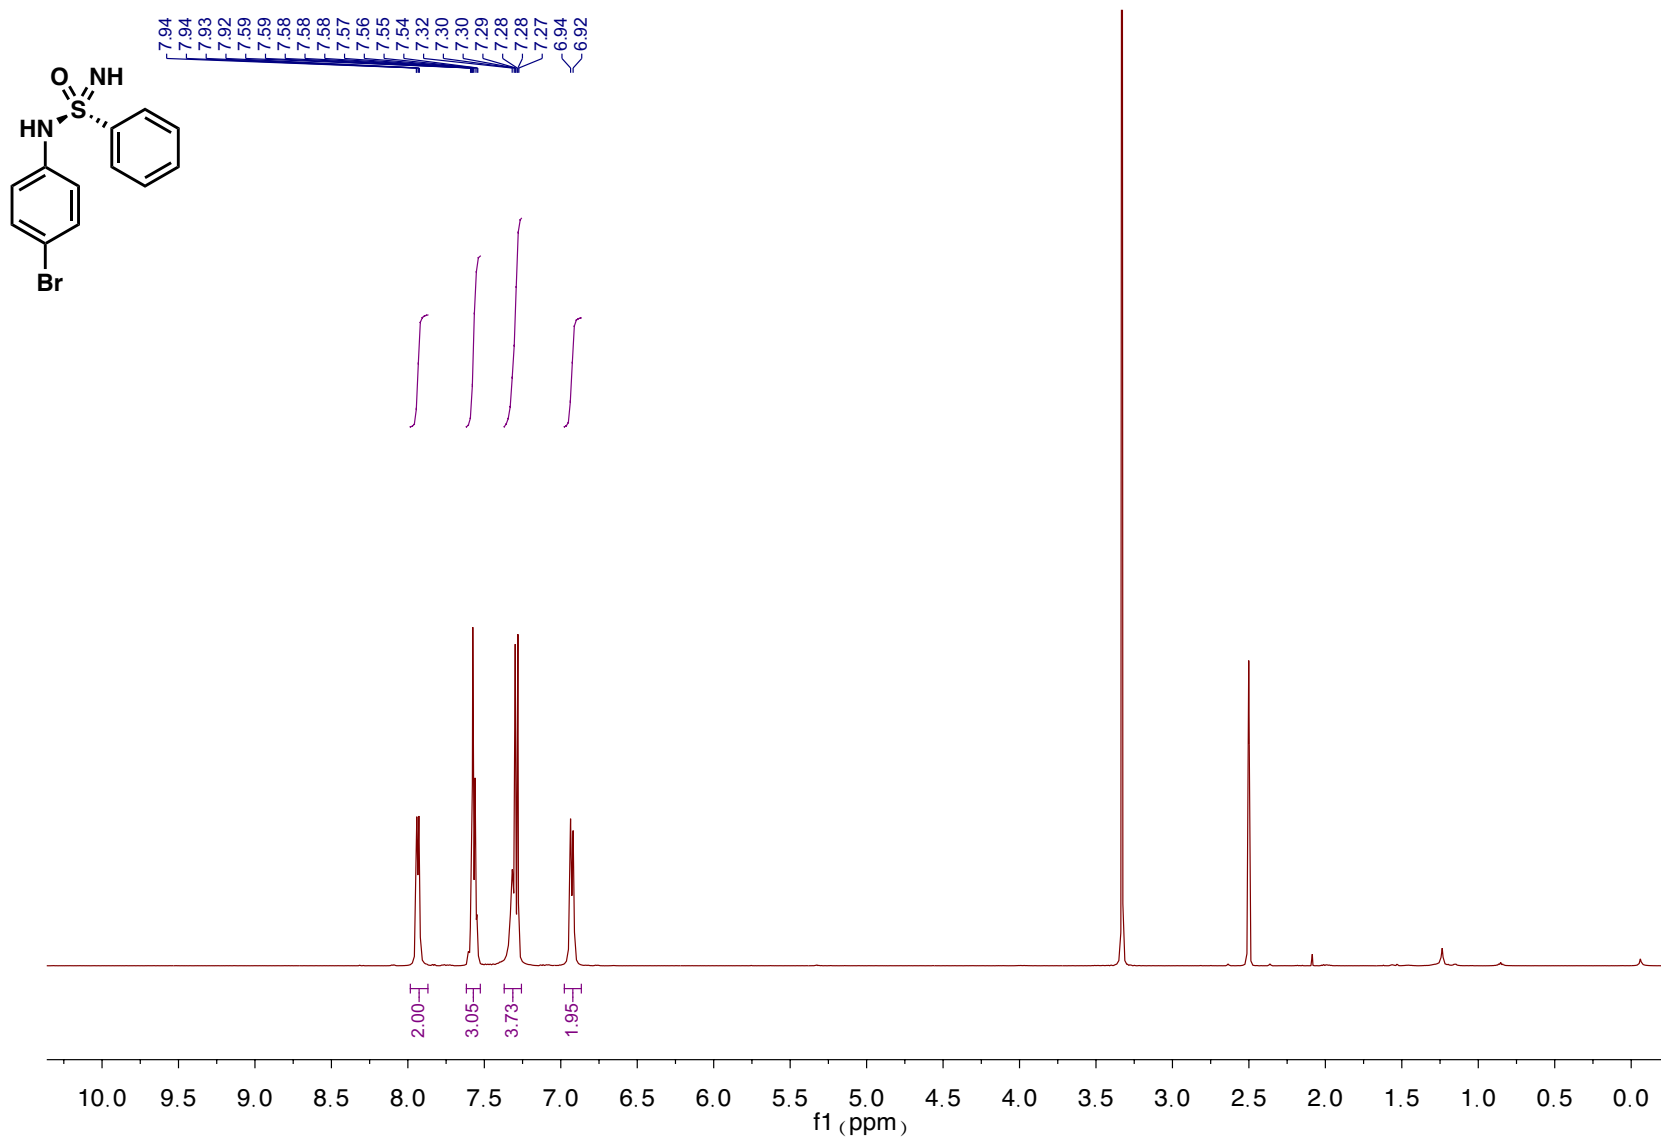

**$^{13}\text{C}$  NMR of compound 10b:**

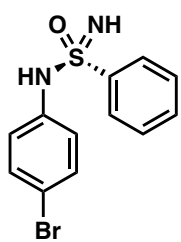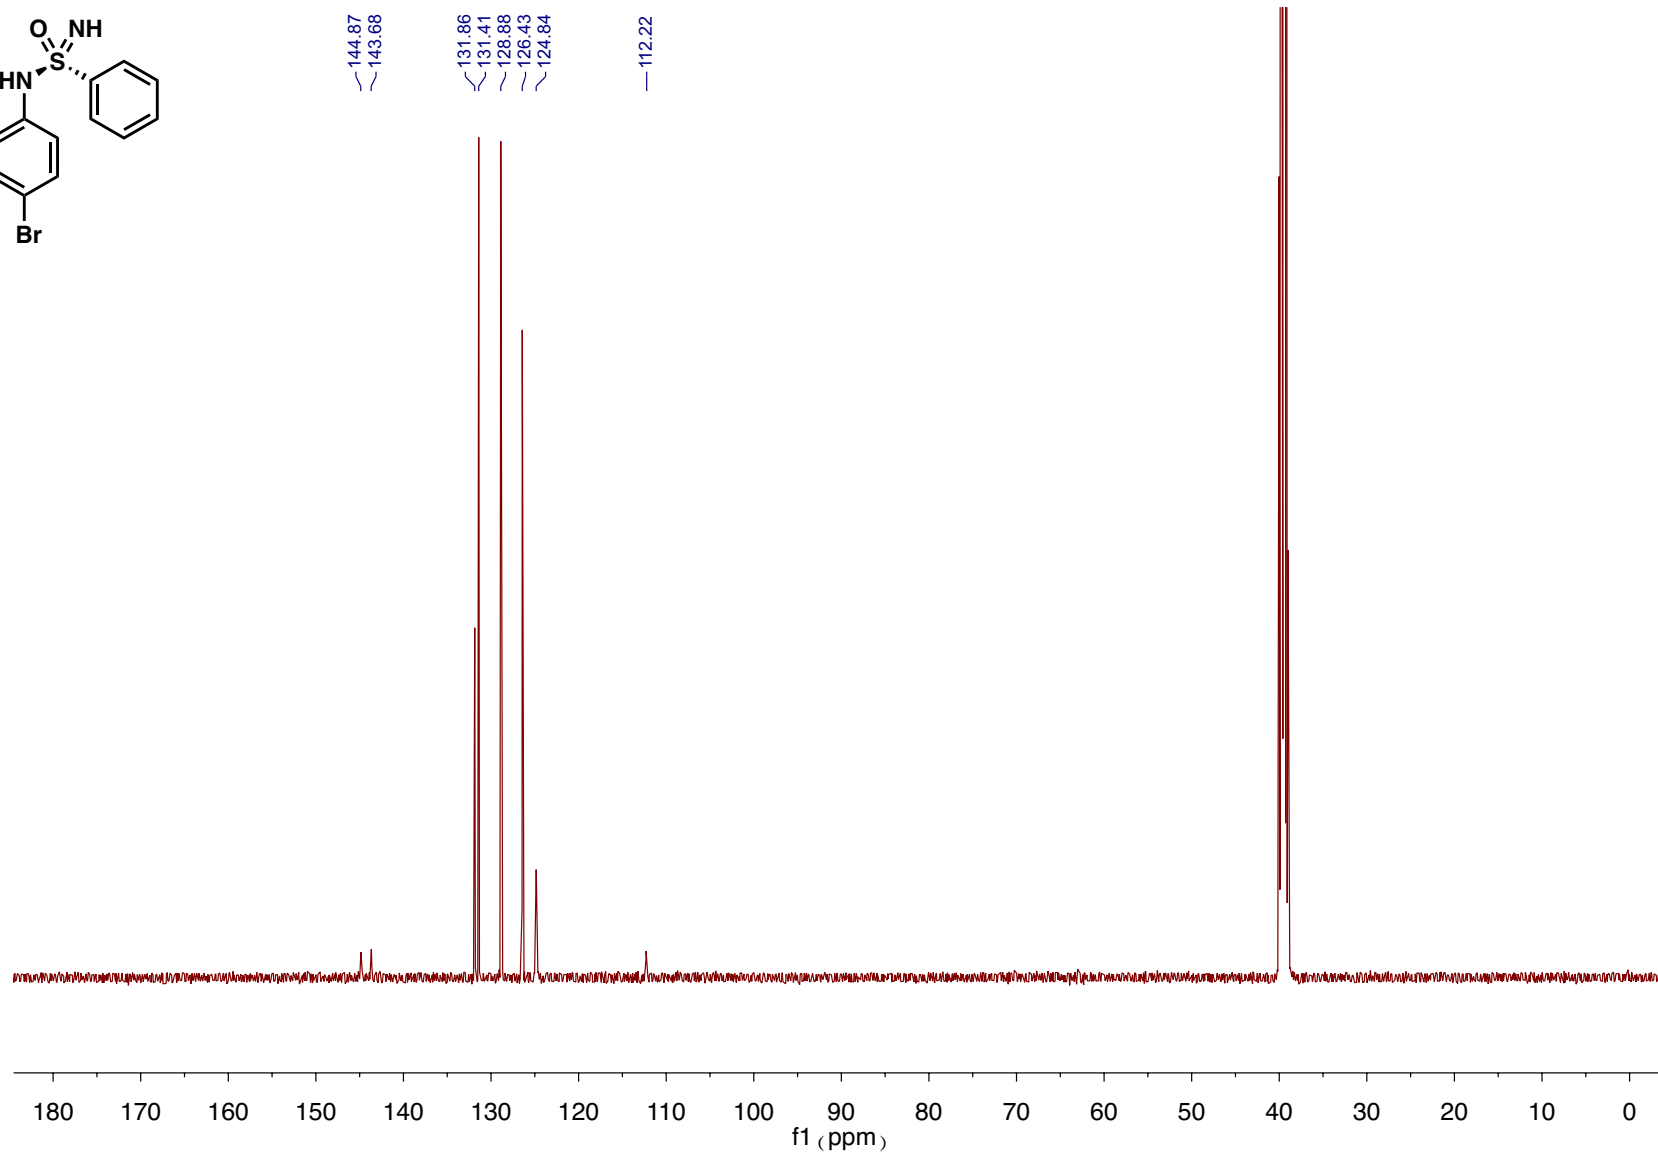

**<sup>1</sup>H NMR of compound 12:**

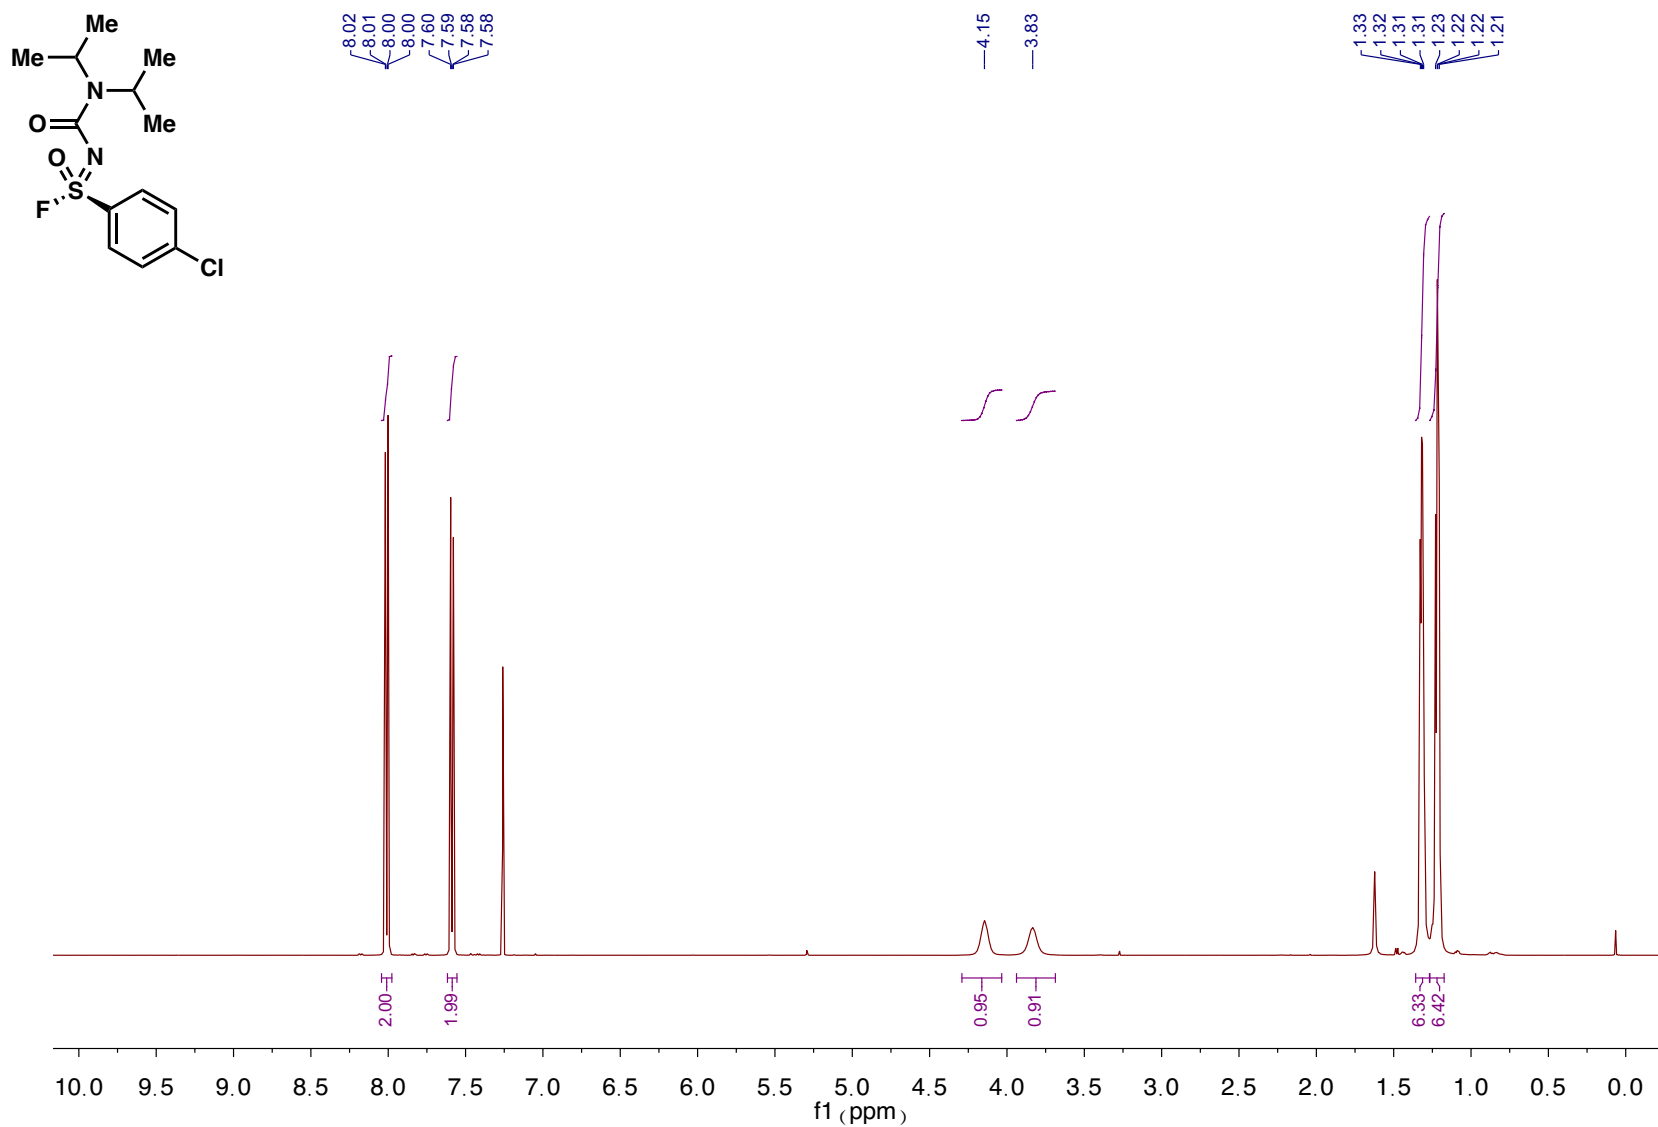

**$^{13}\text{C}$  NMR of compound 12:**

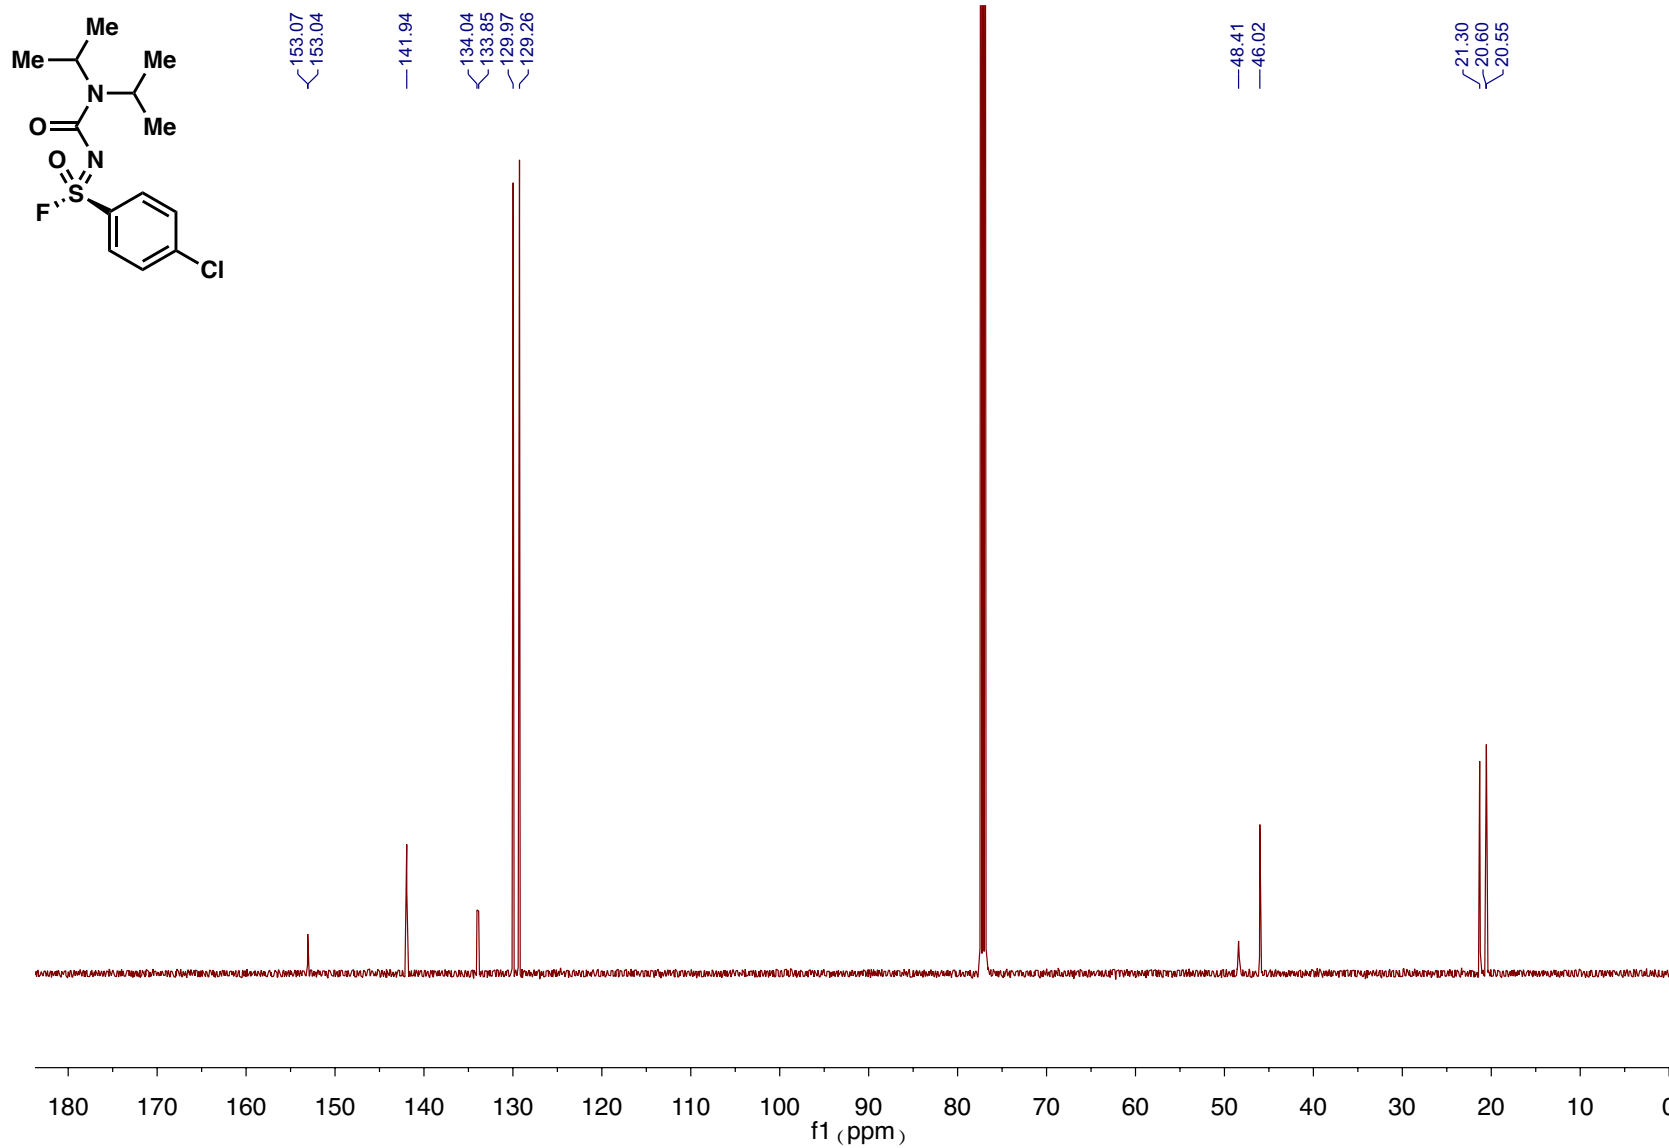

**$^{19}\text{F}$  NMR of compound 12:**

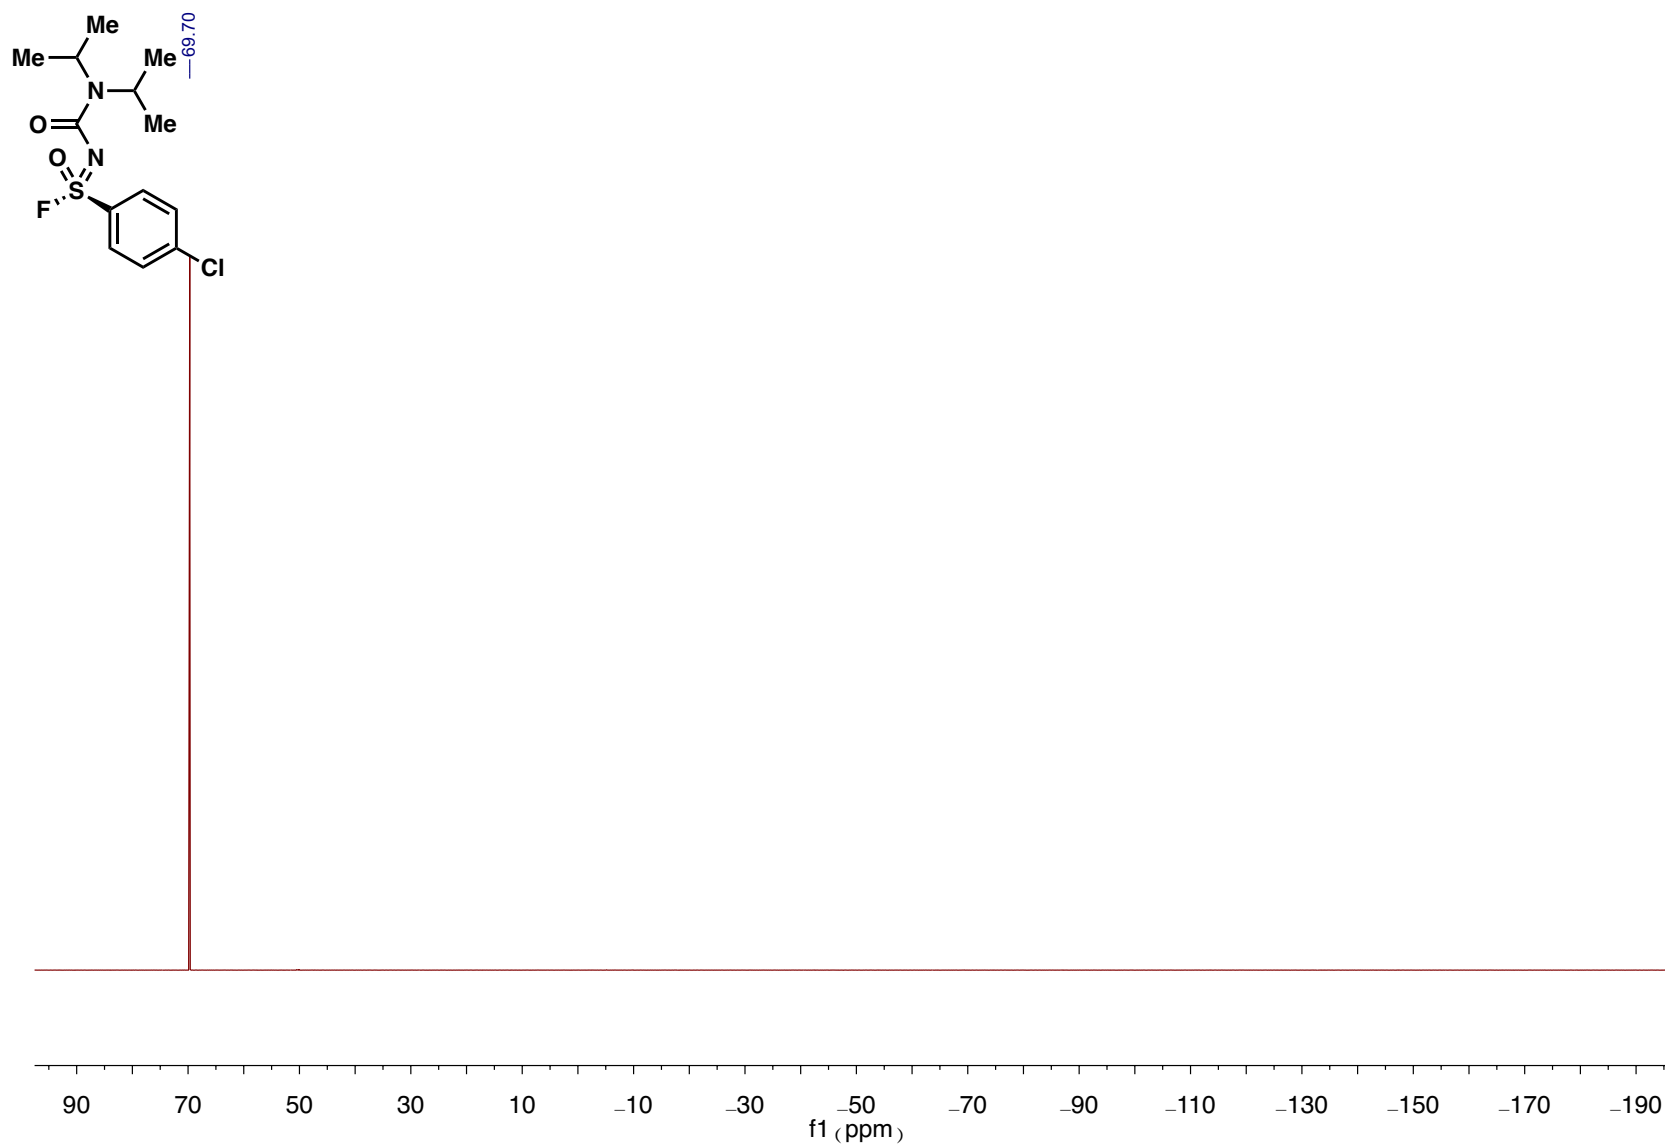

**<sup>1</sup>H NMR of compound 13:**

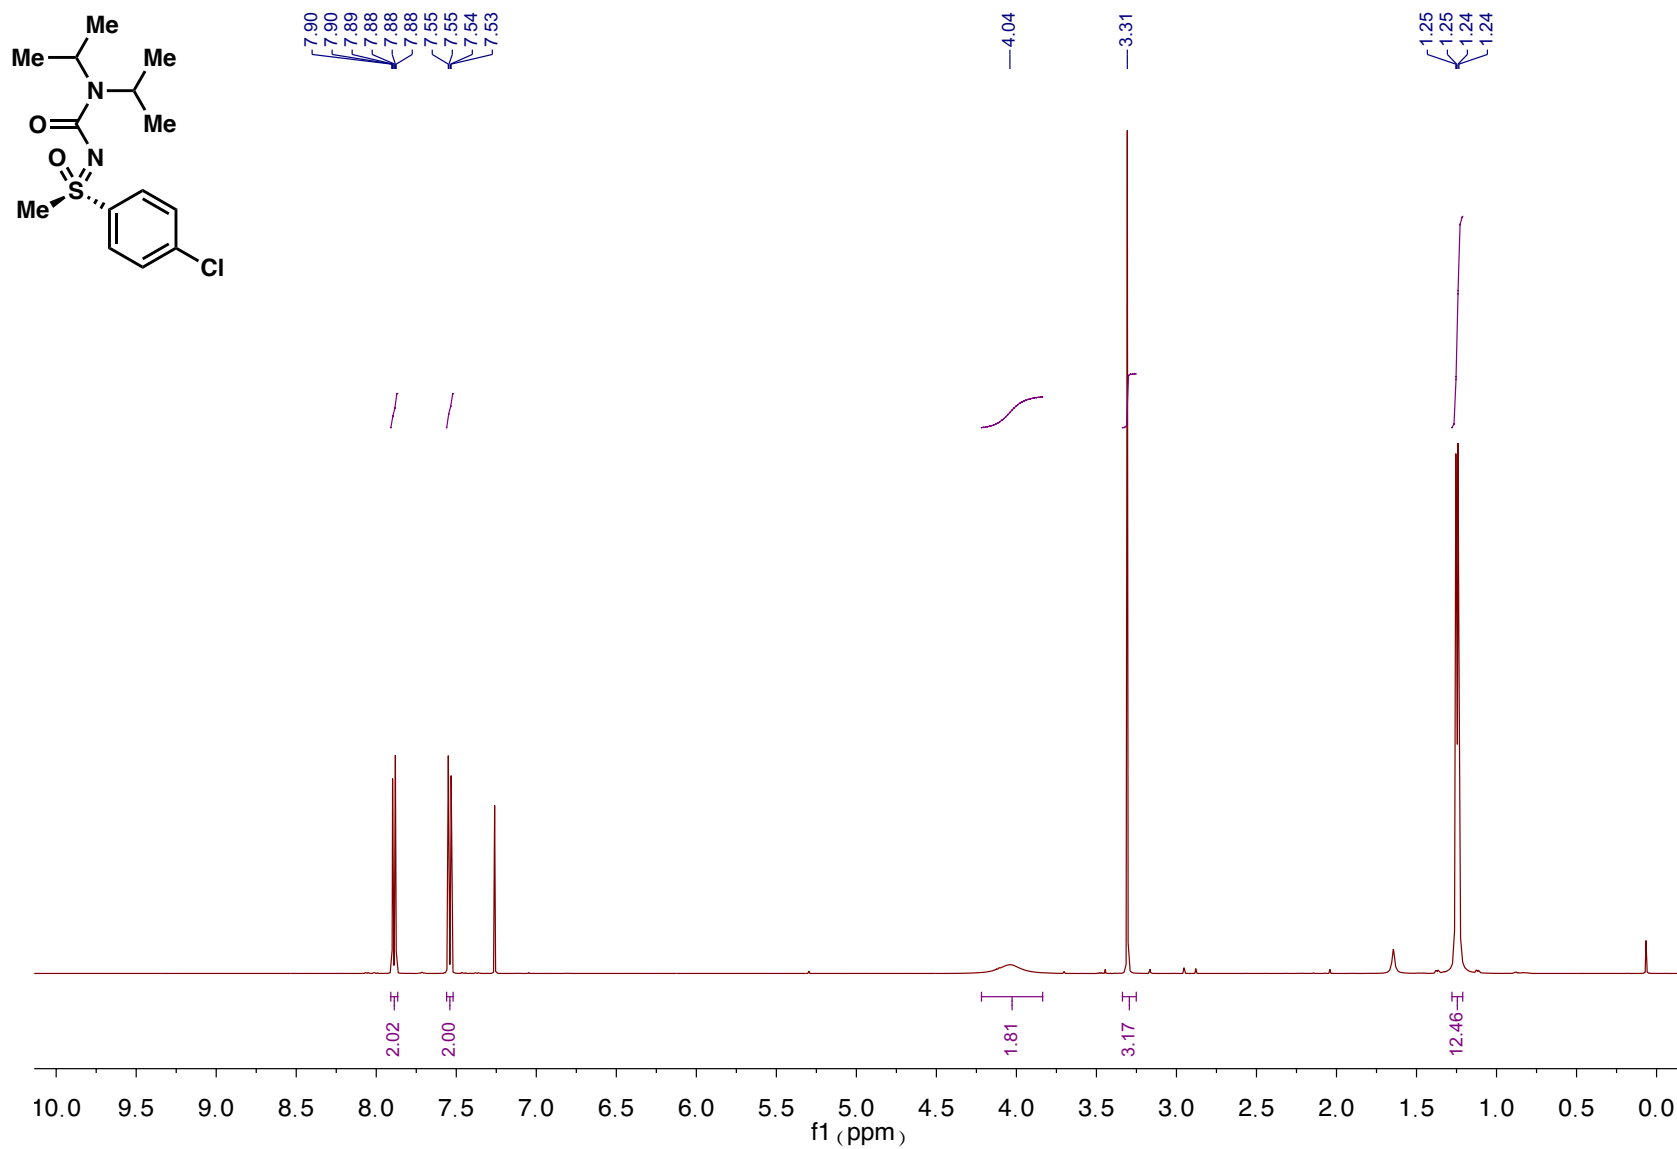

**$^{13}\text{C}$  NMR of compound 13:**

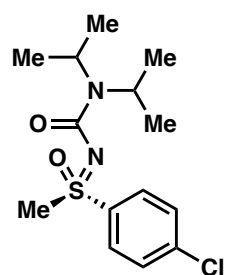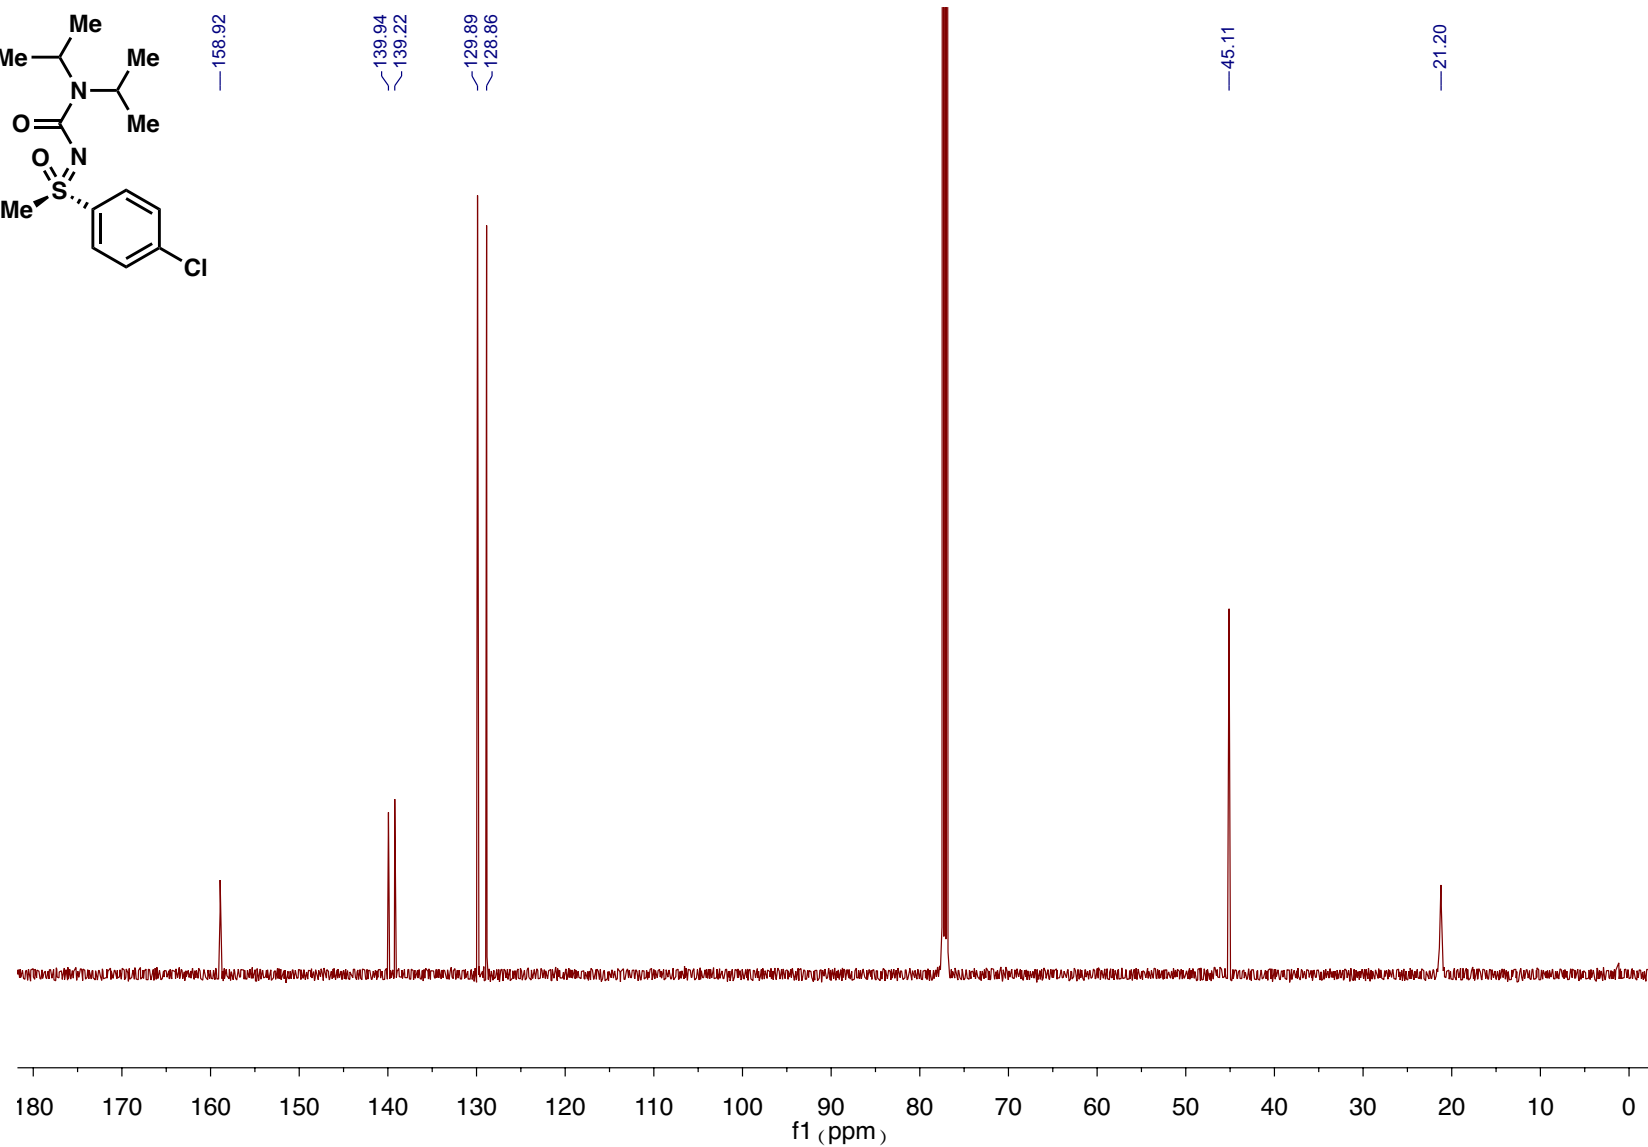

**<sup>1</sup>H NMR of compound 16:**

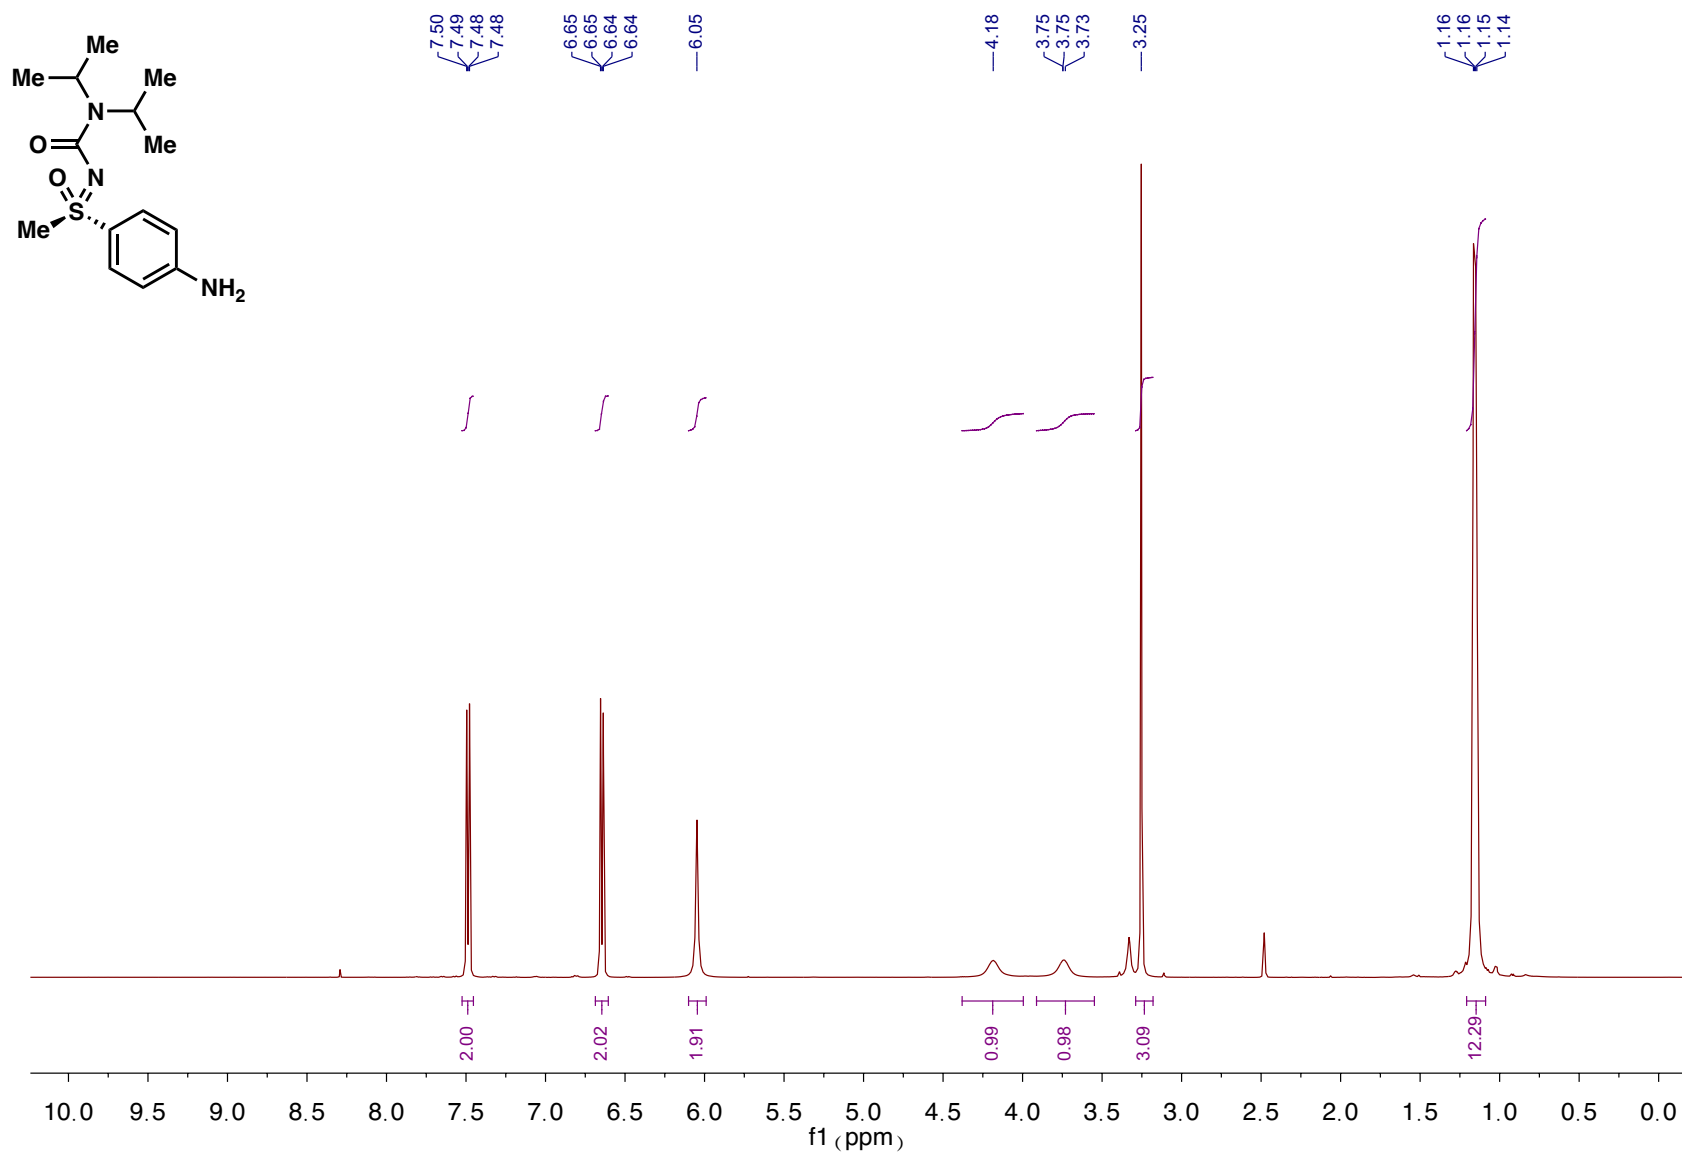

**$^{13}\text{C}$  NMR of compound 16:**

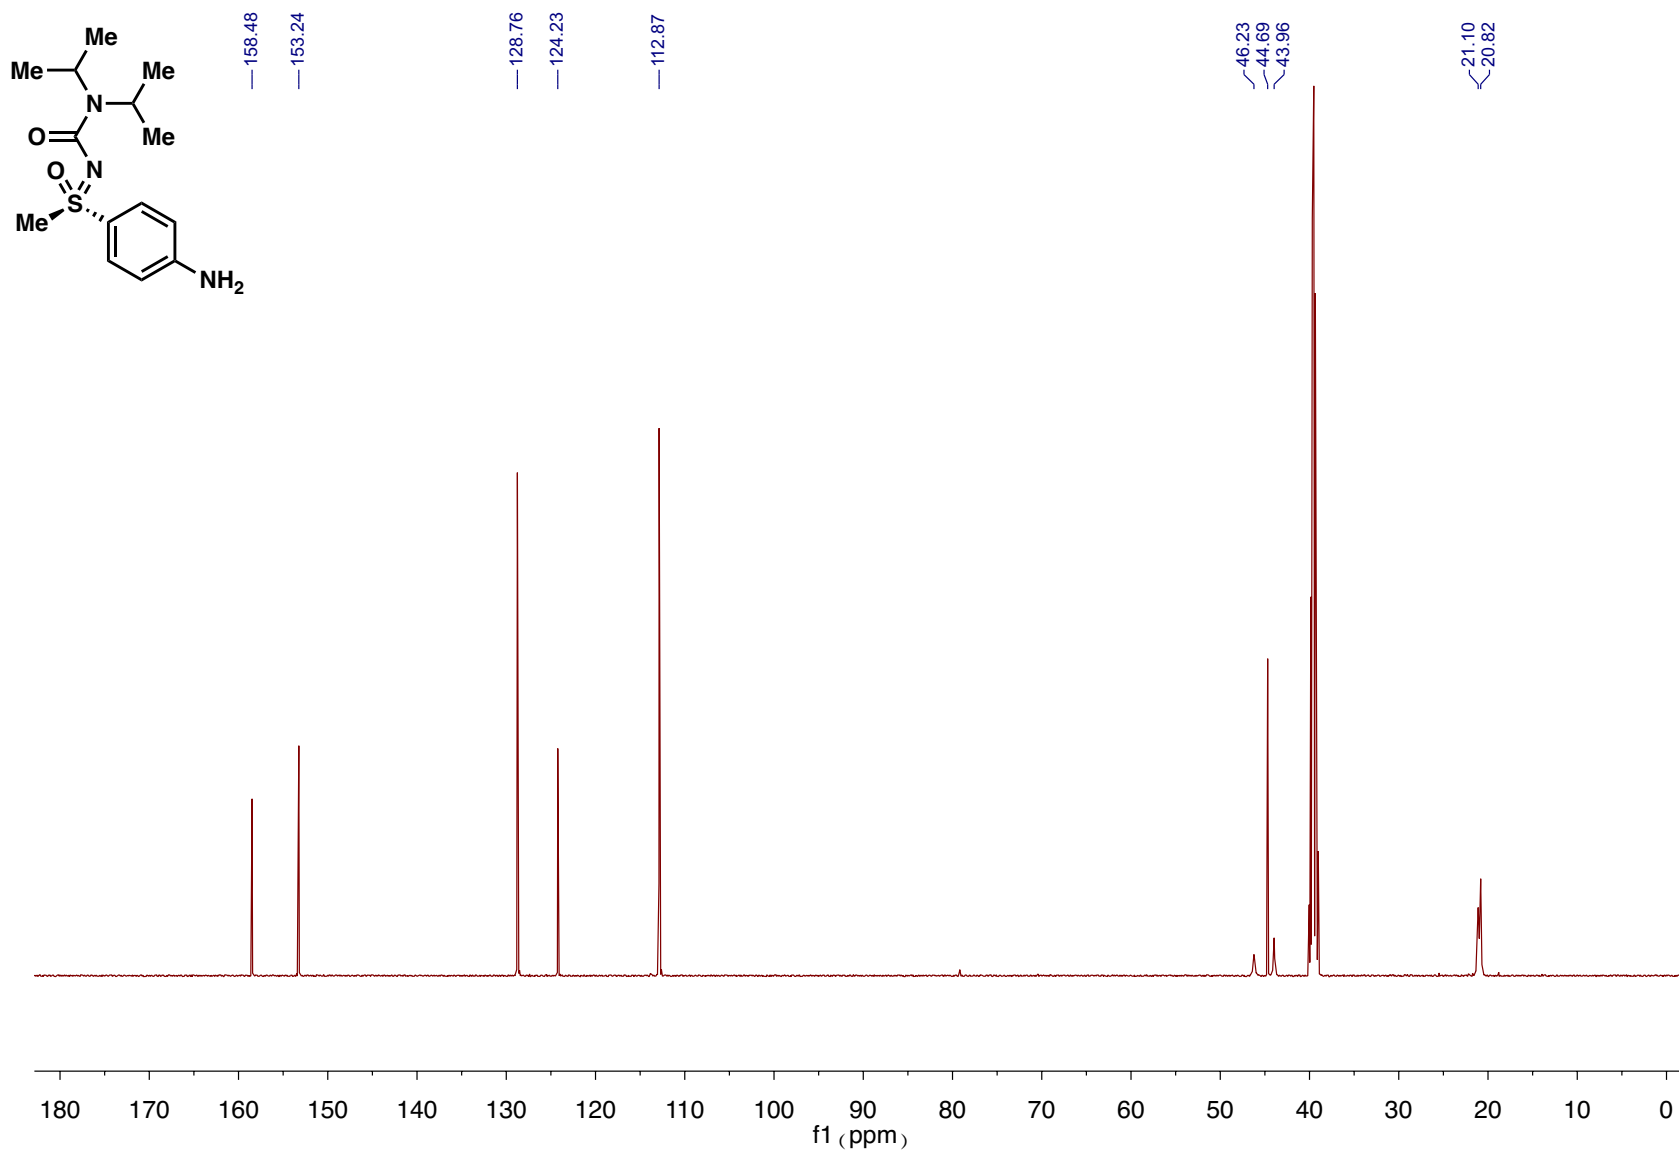

**<sup>1</sup>H NMR of urea protected 15:**

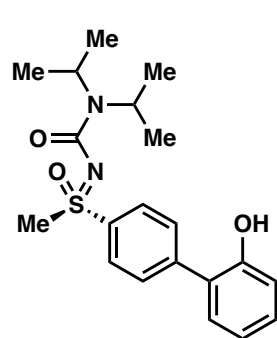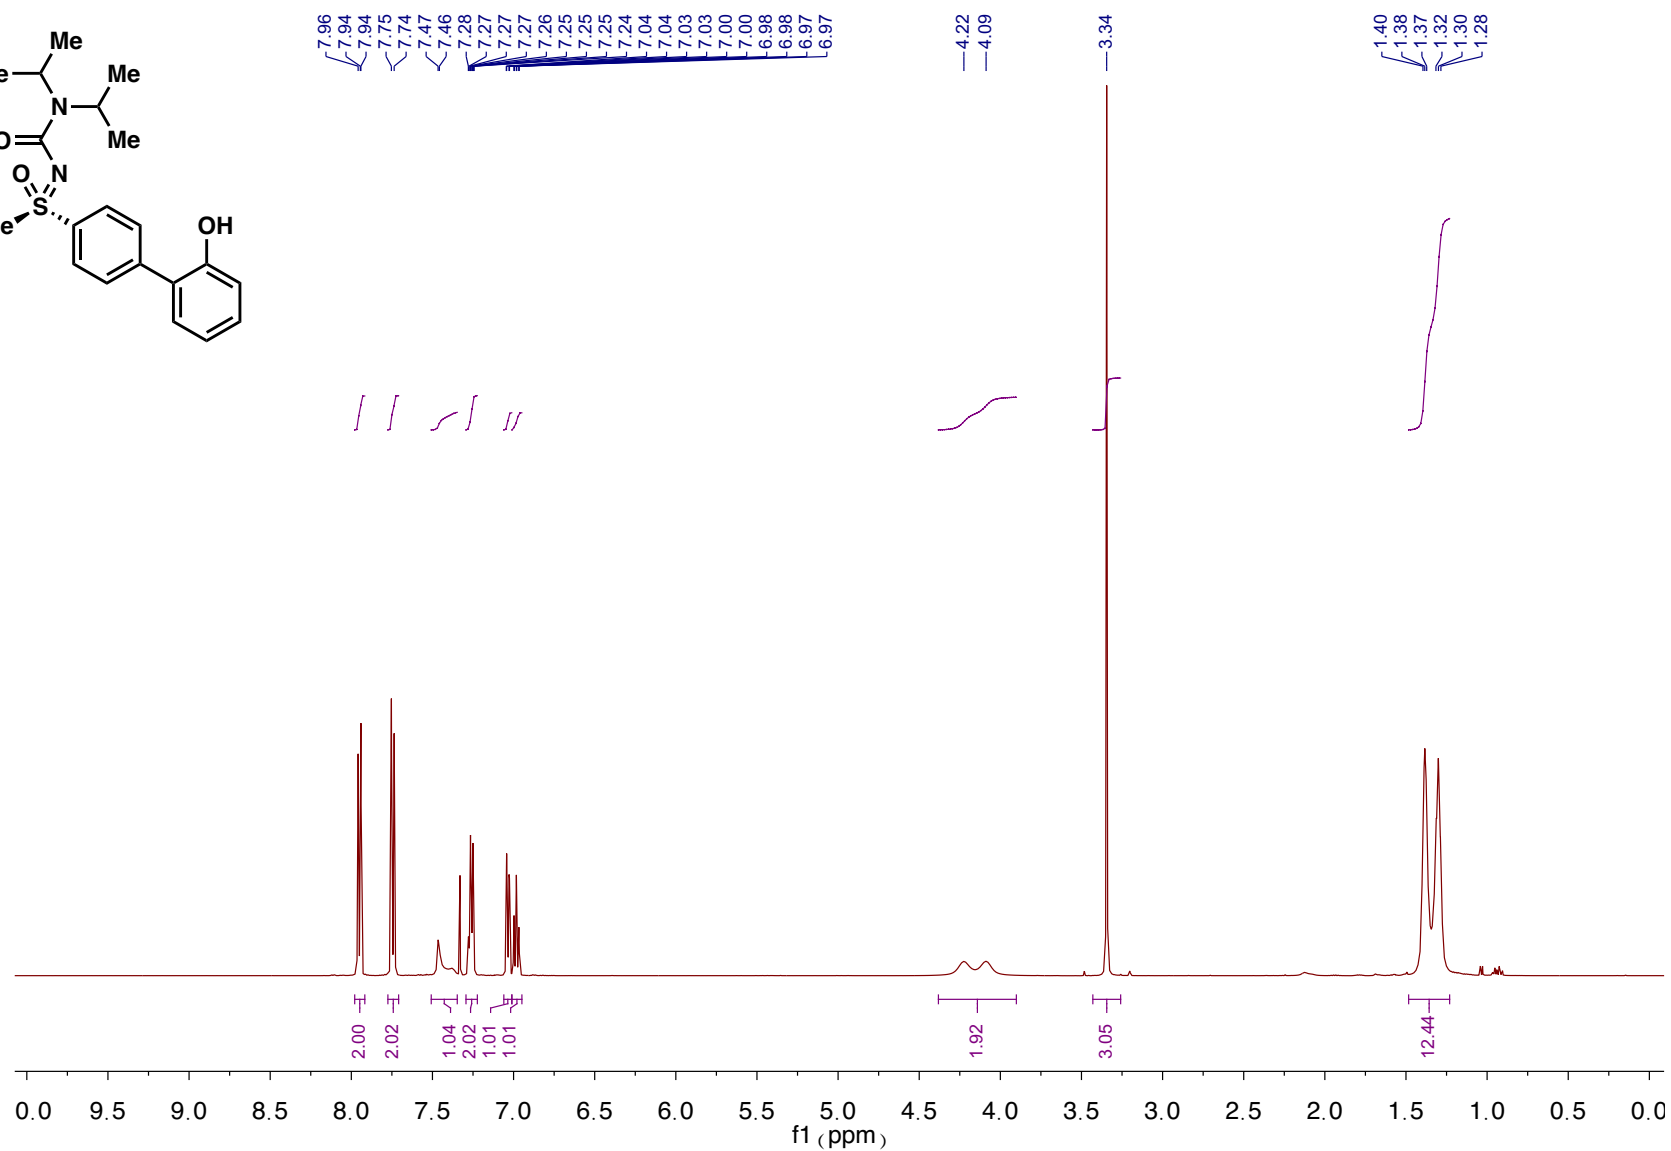

**$^{13}\text{C}$  NMR of urea protected 15:**

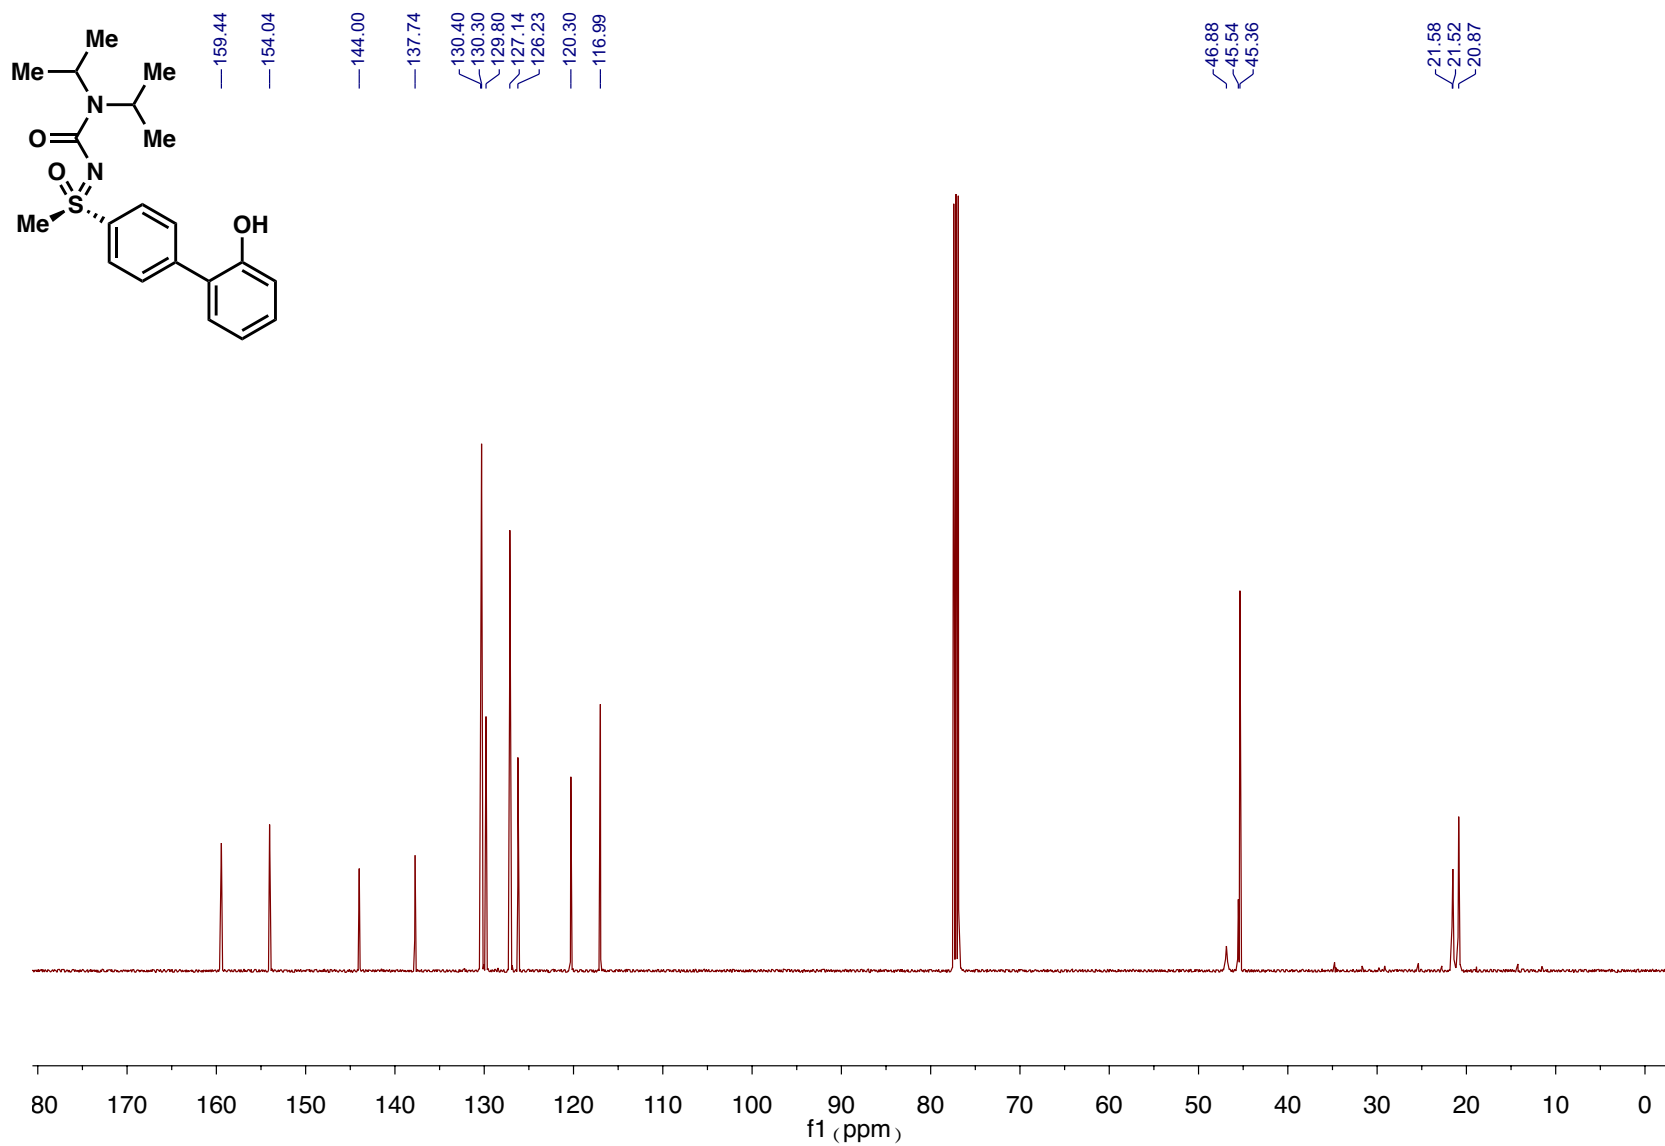

**<sup>1</sup>H NMR of compound 15:**

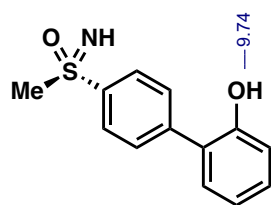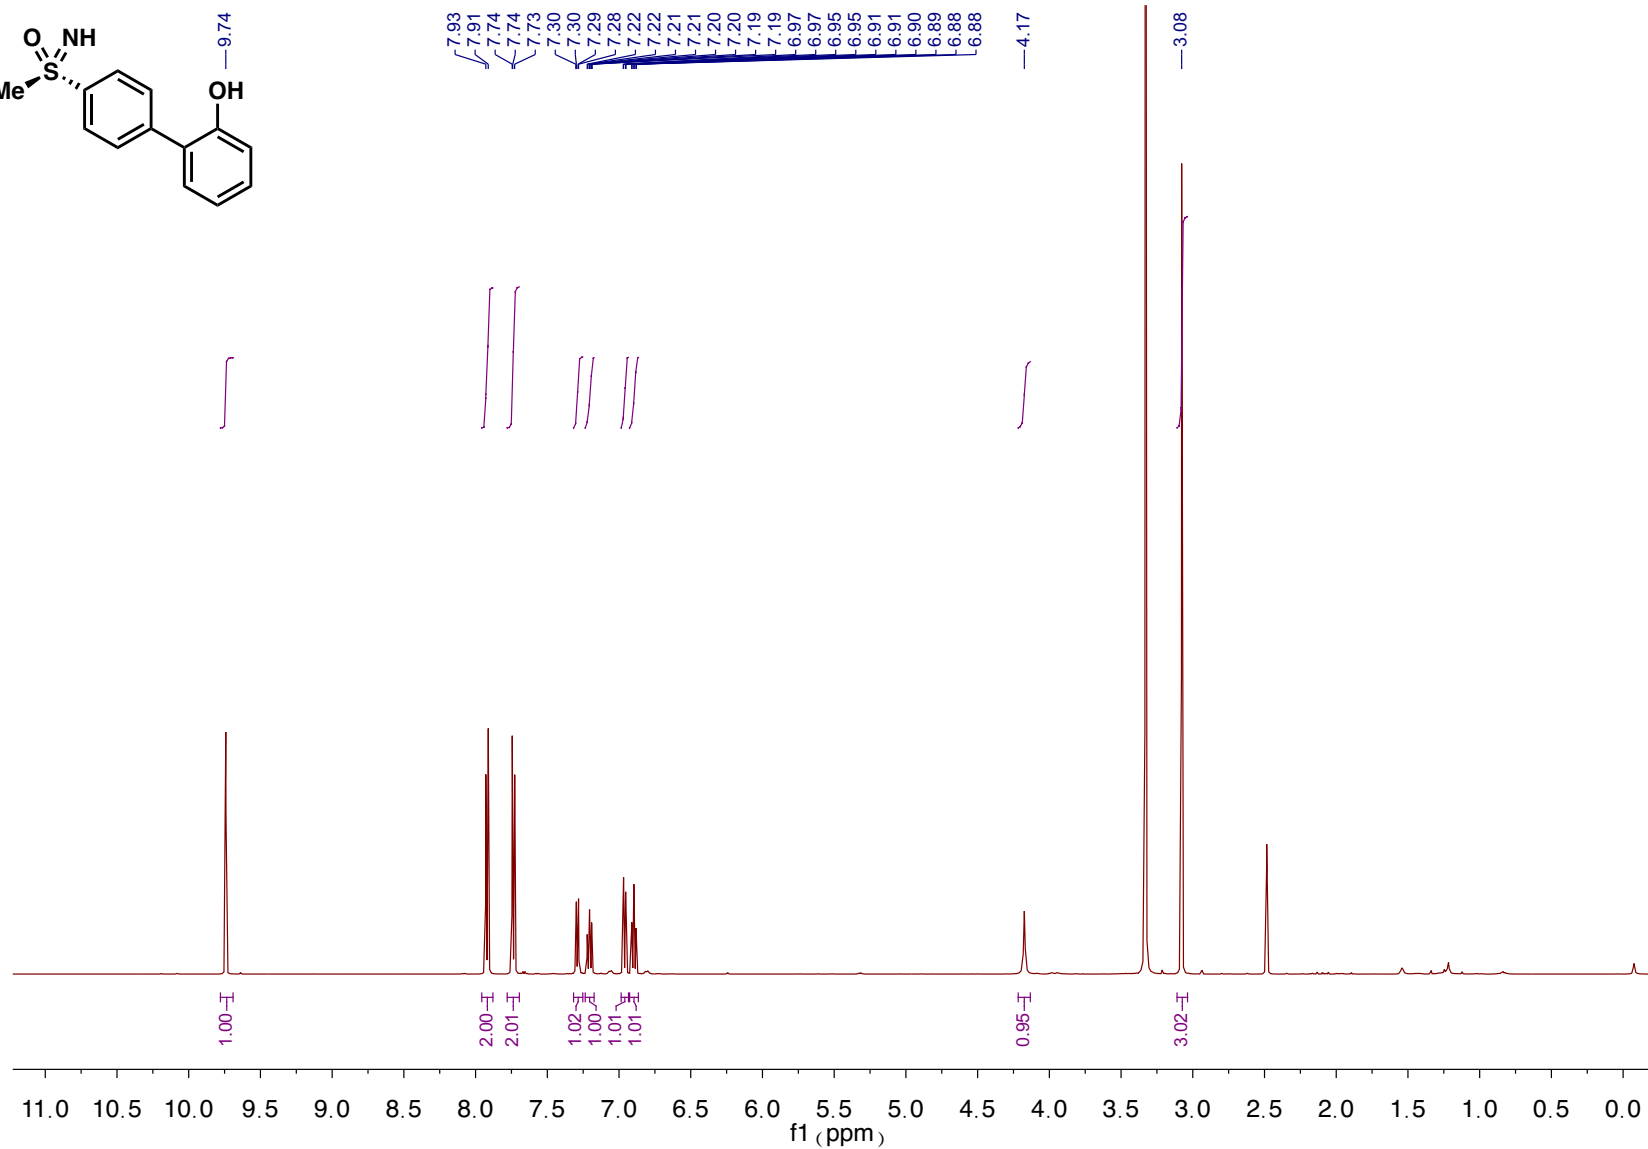

**<sup>13</sup>C NMR of compound 15:**

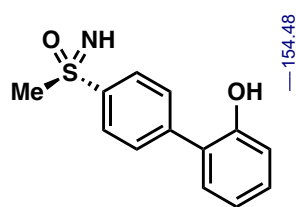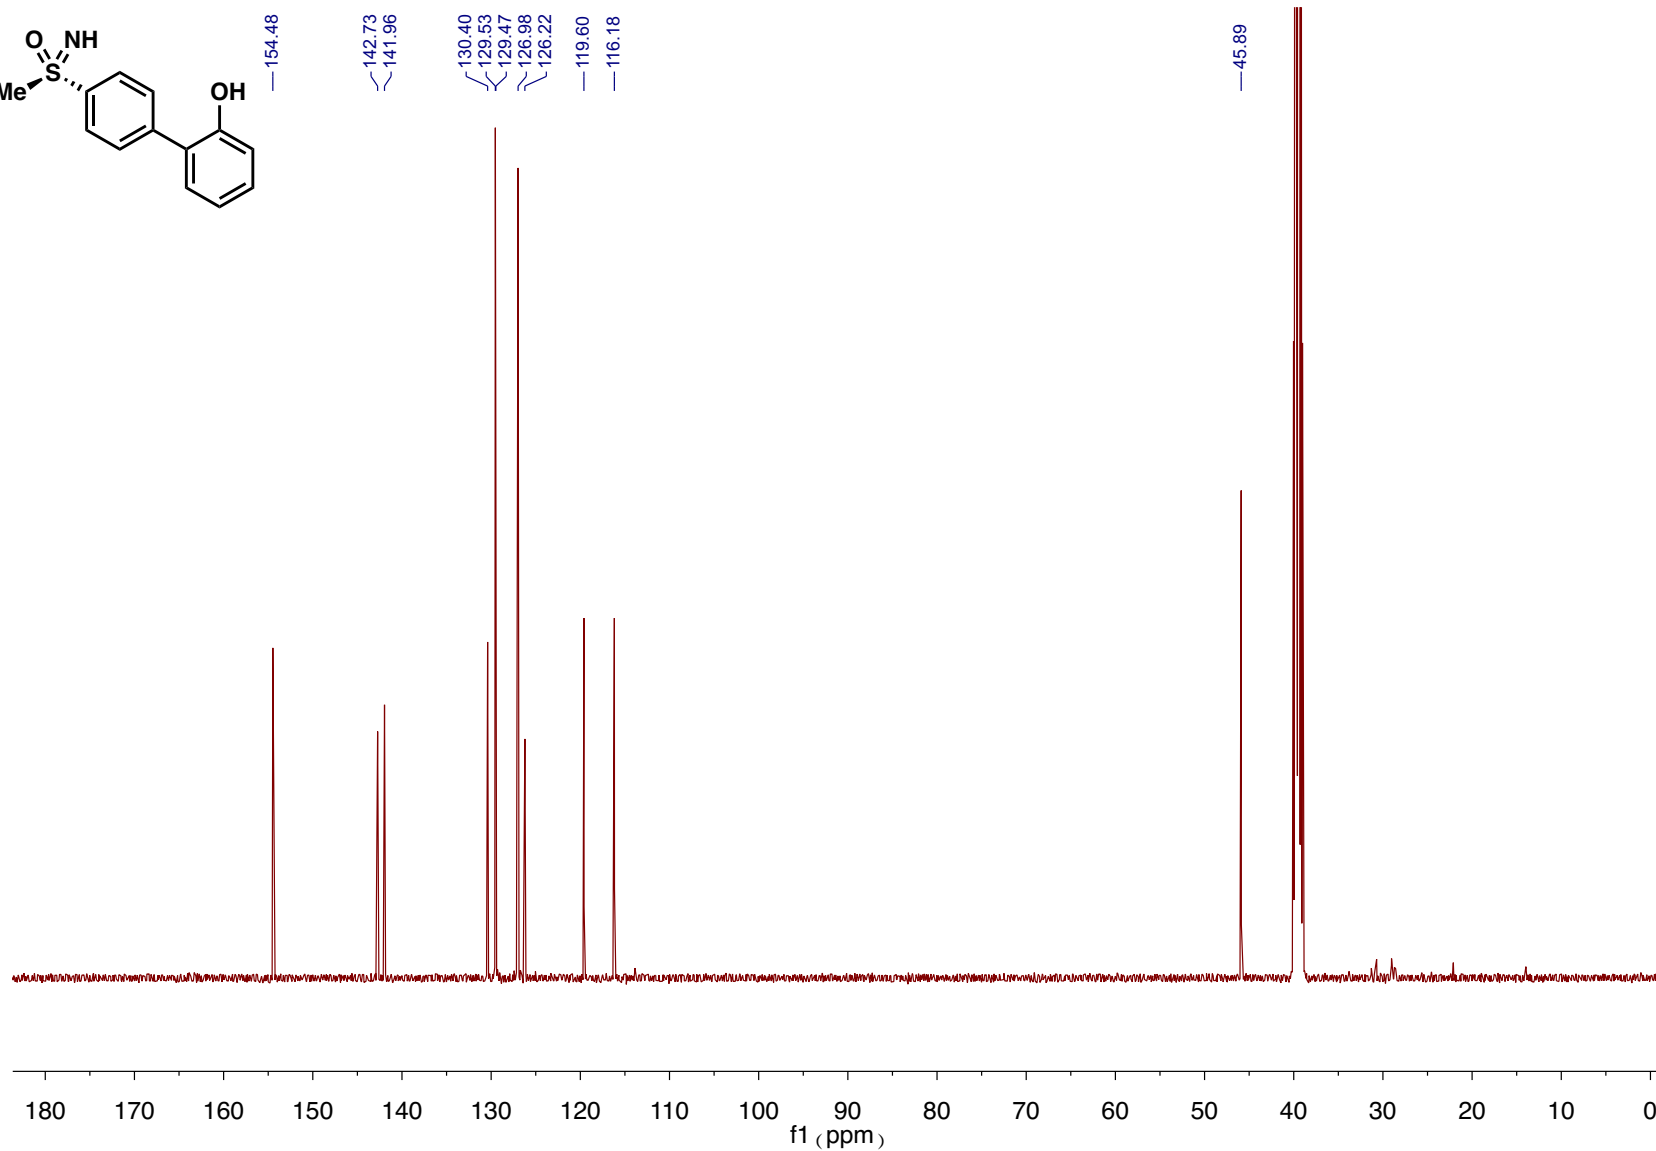

**<sup>1</sup>H NMR of compound 19:**

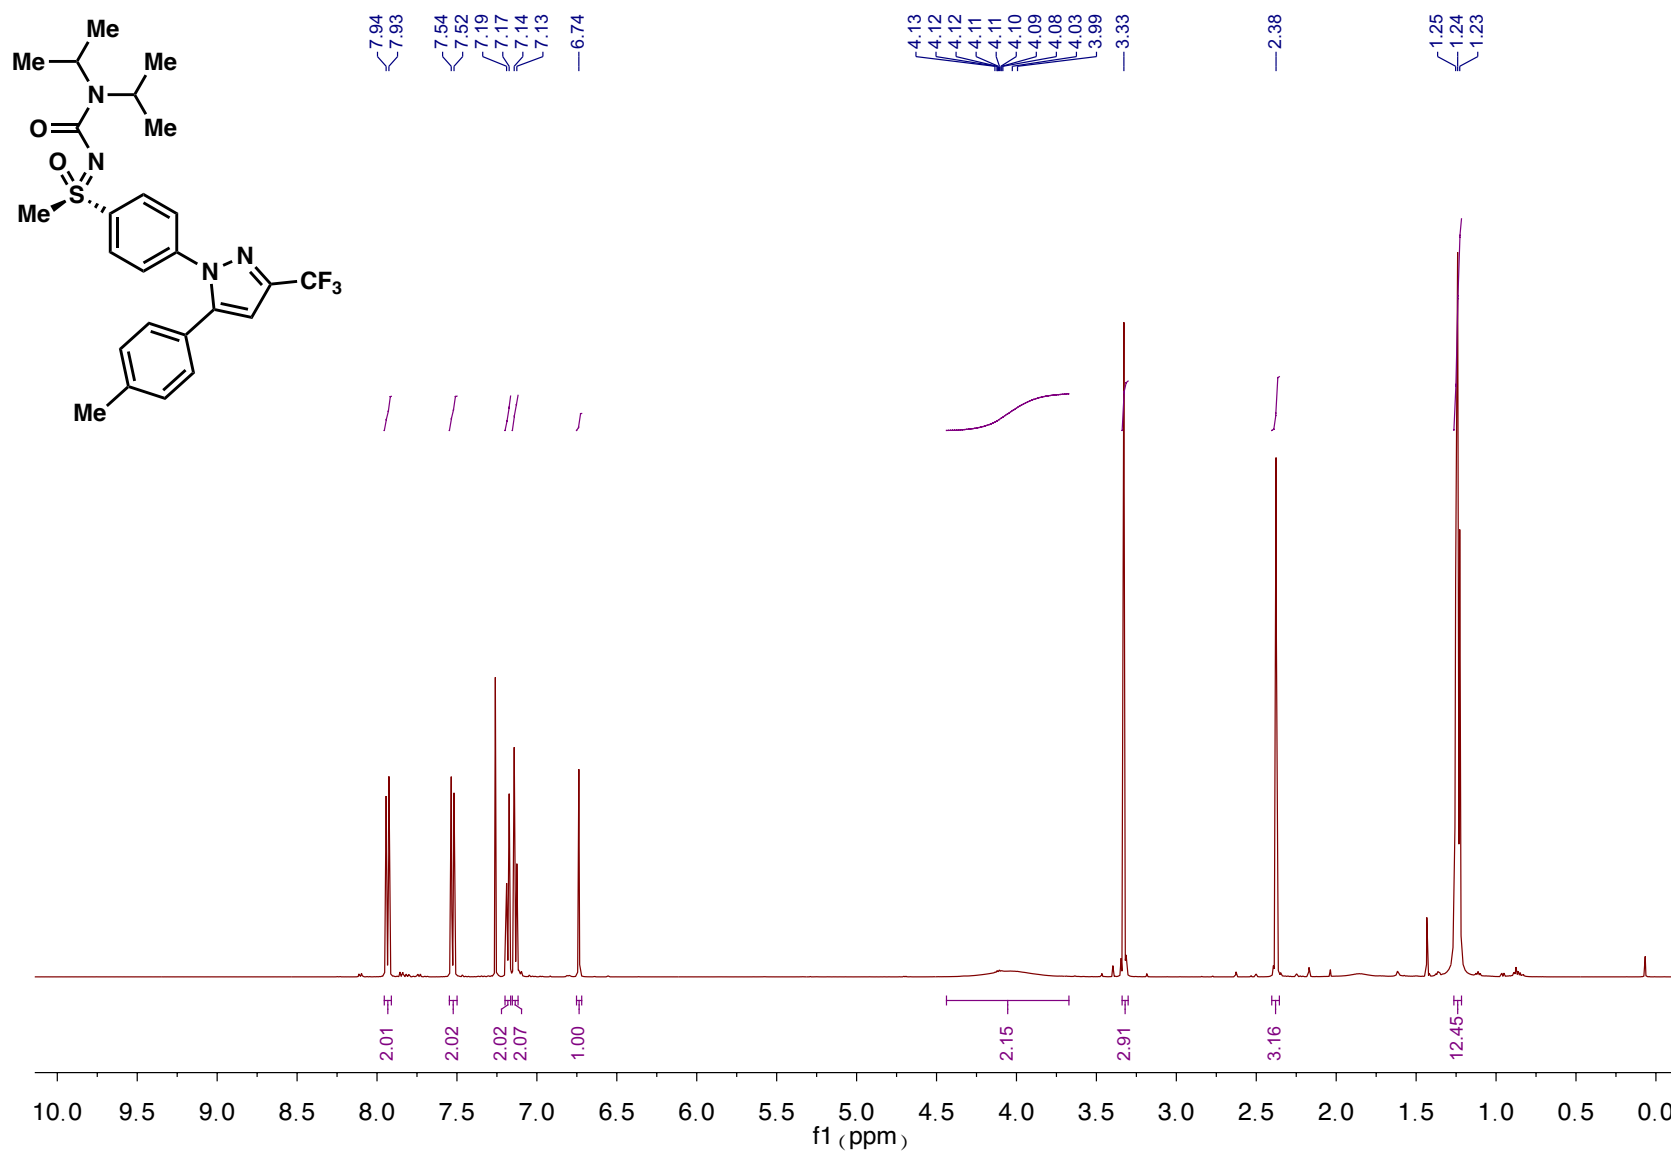

**<sup>13</sup>C NMR of compound 19:**

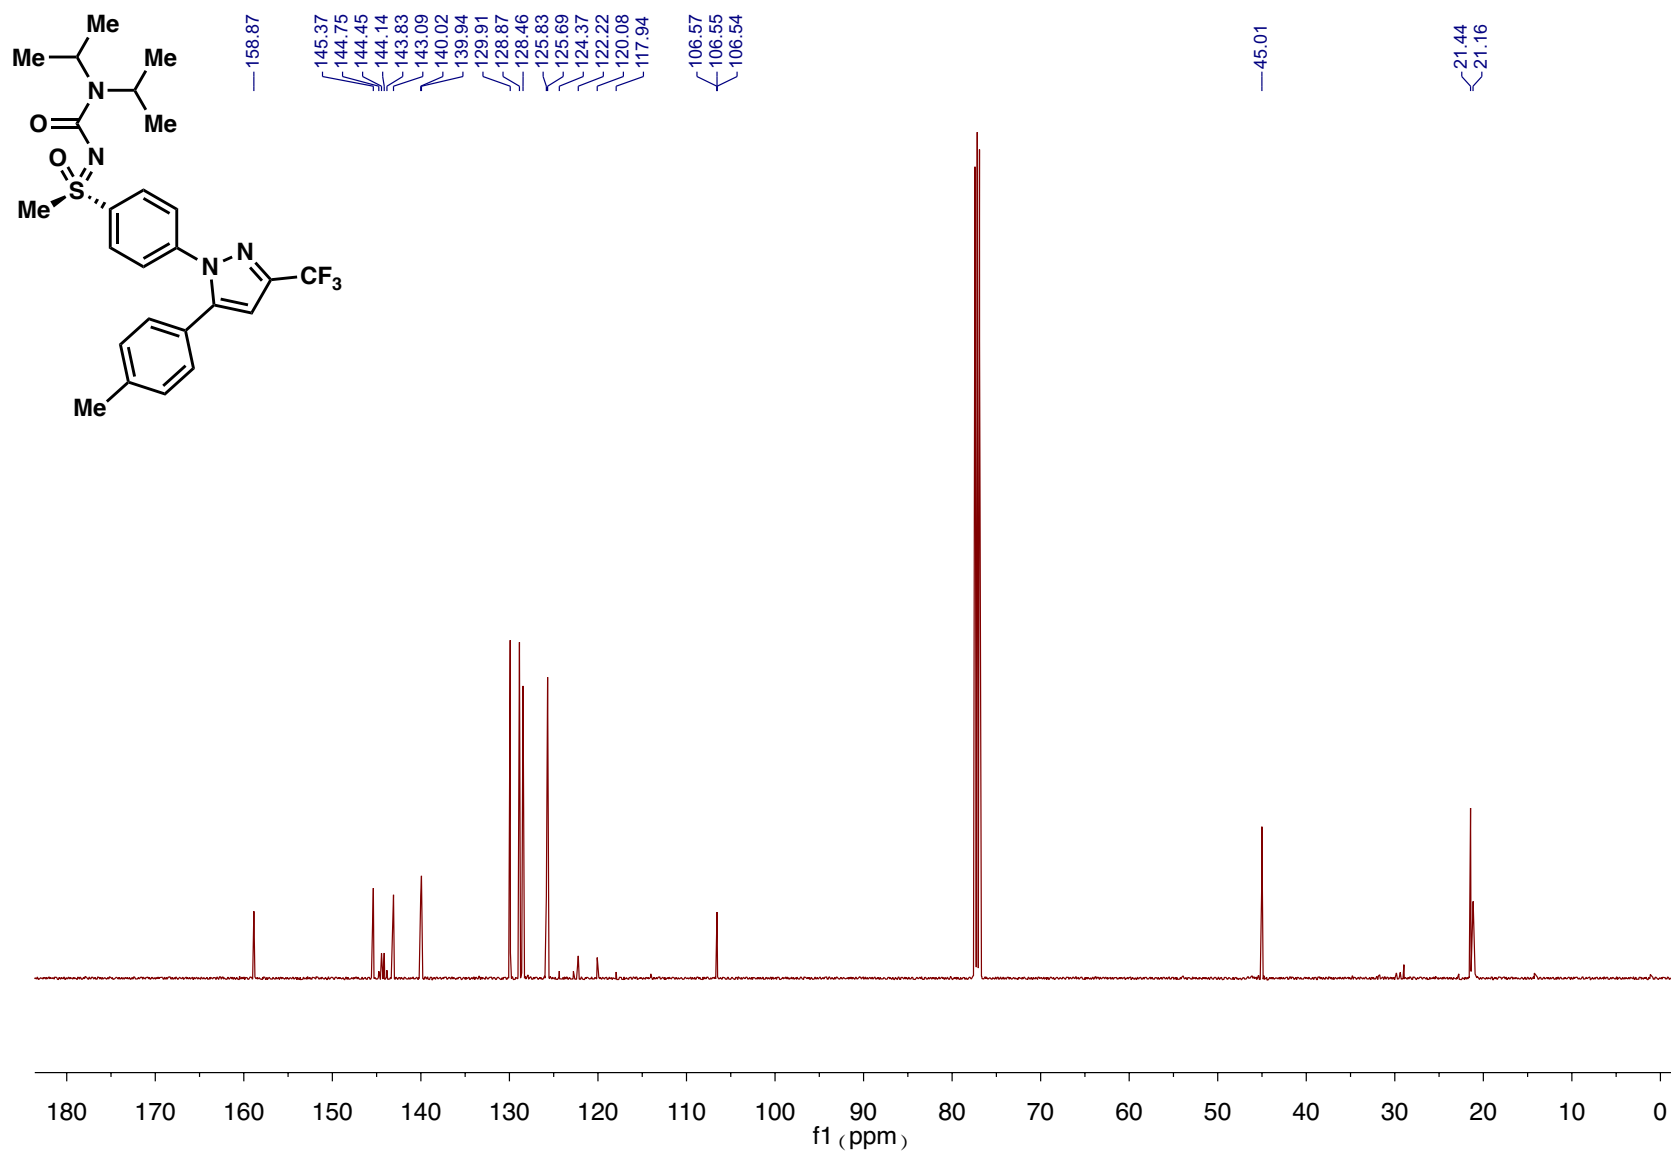

**$^{19}\text{F}$  NMR of compound 19:**

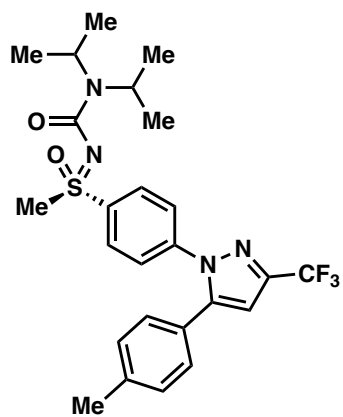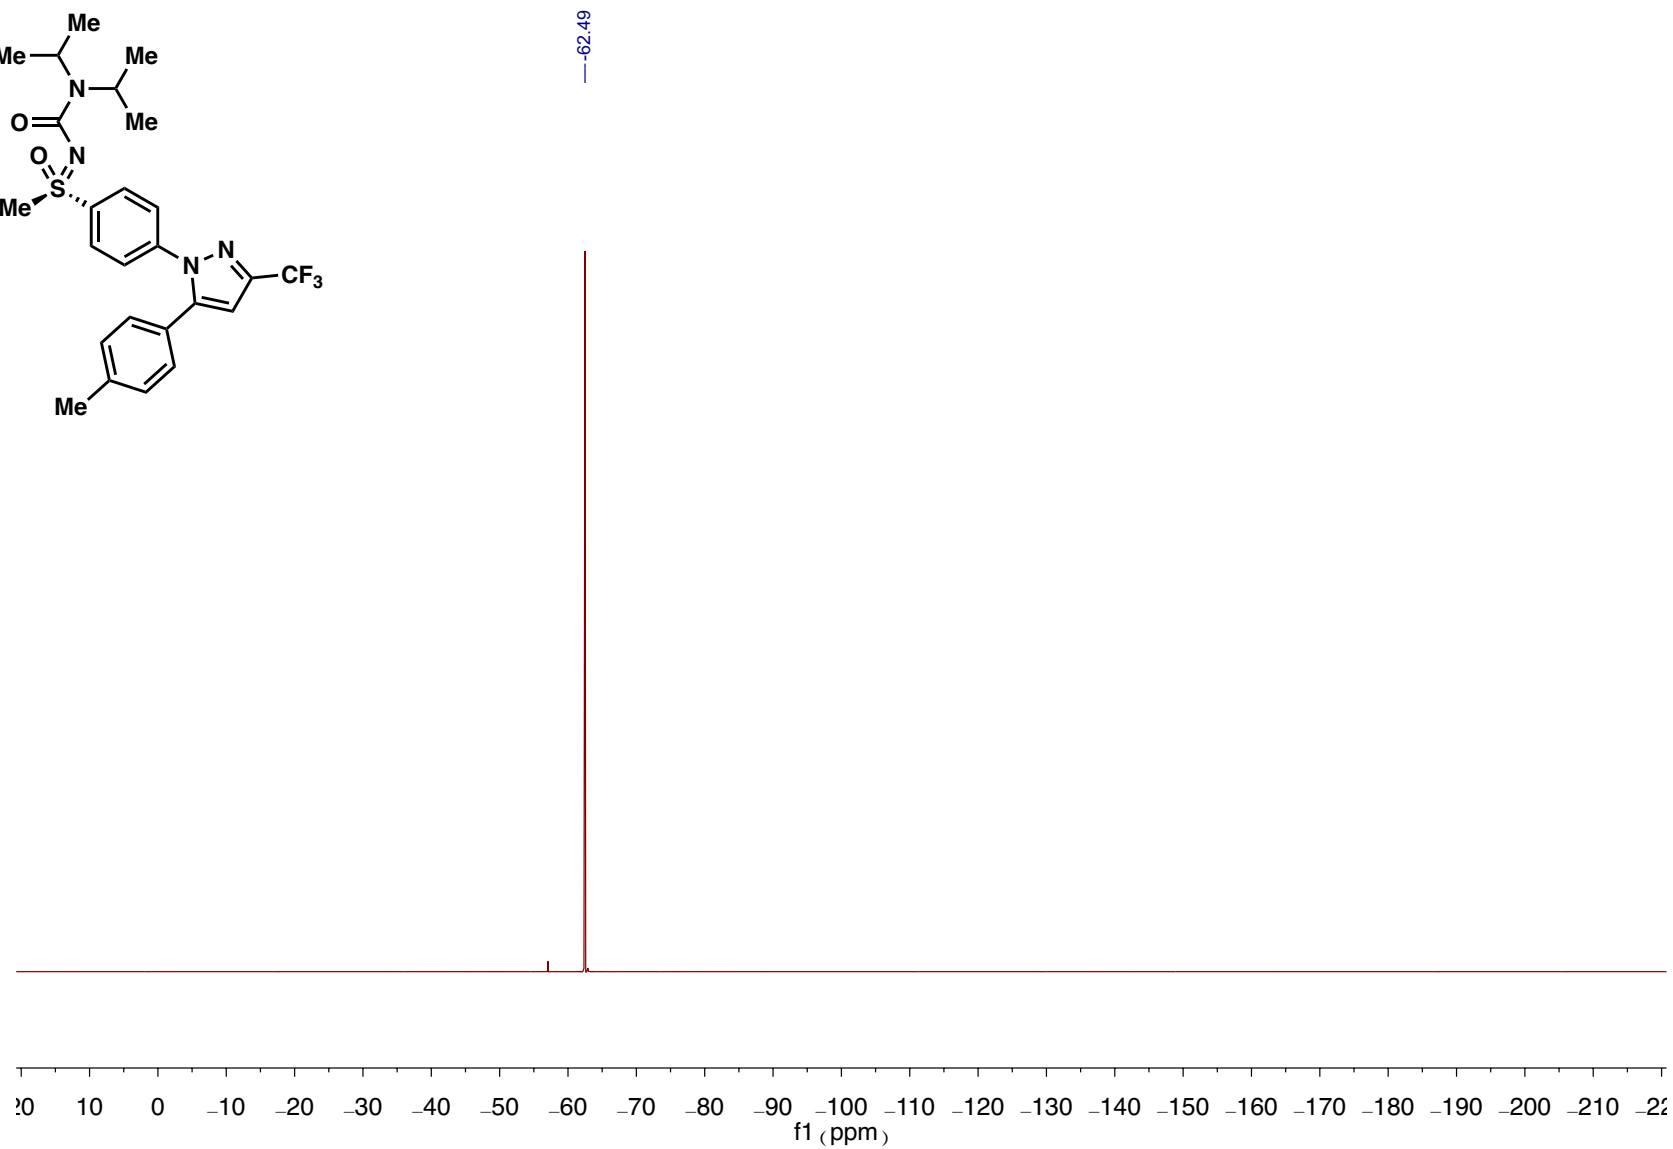

**<sup>1</sup>H NMR of compound 20:**

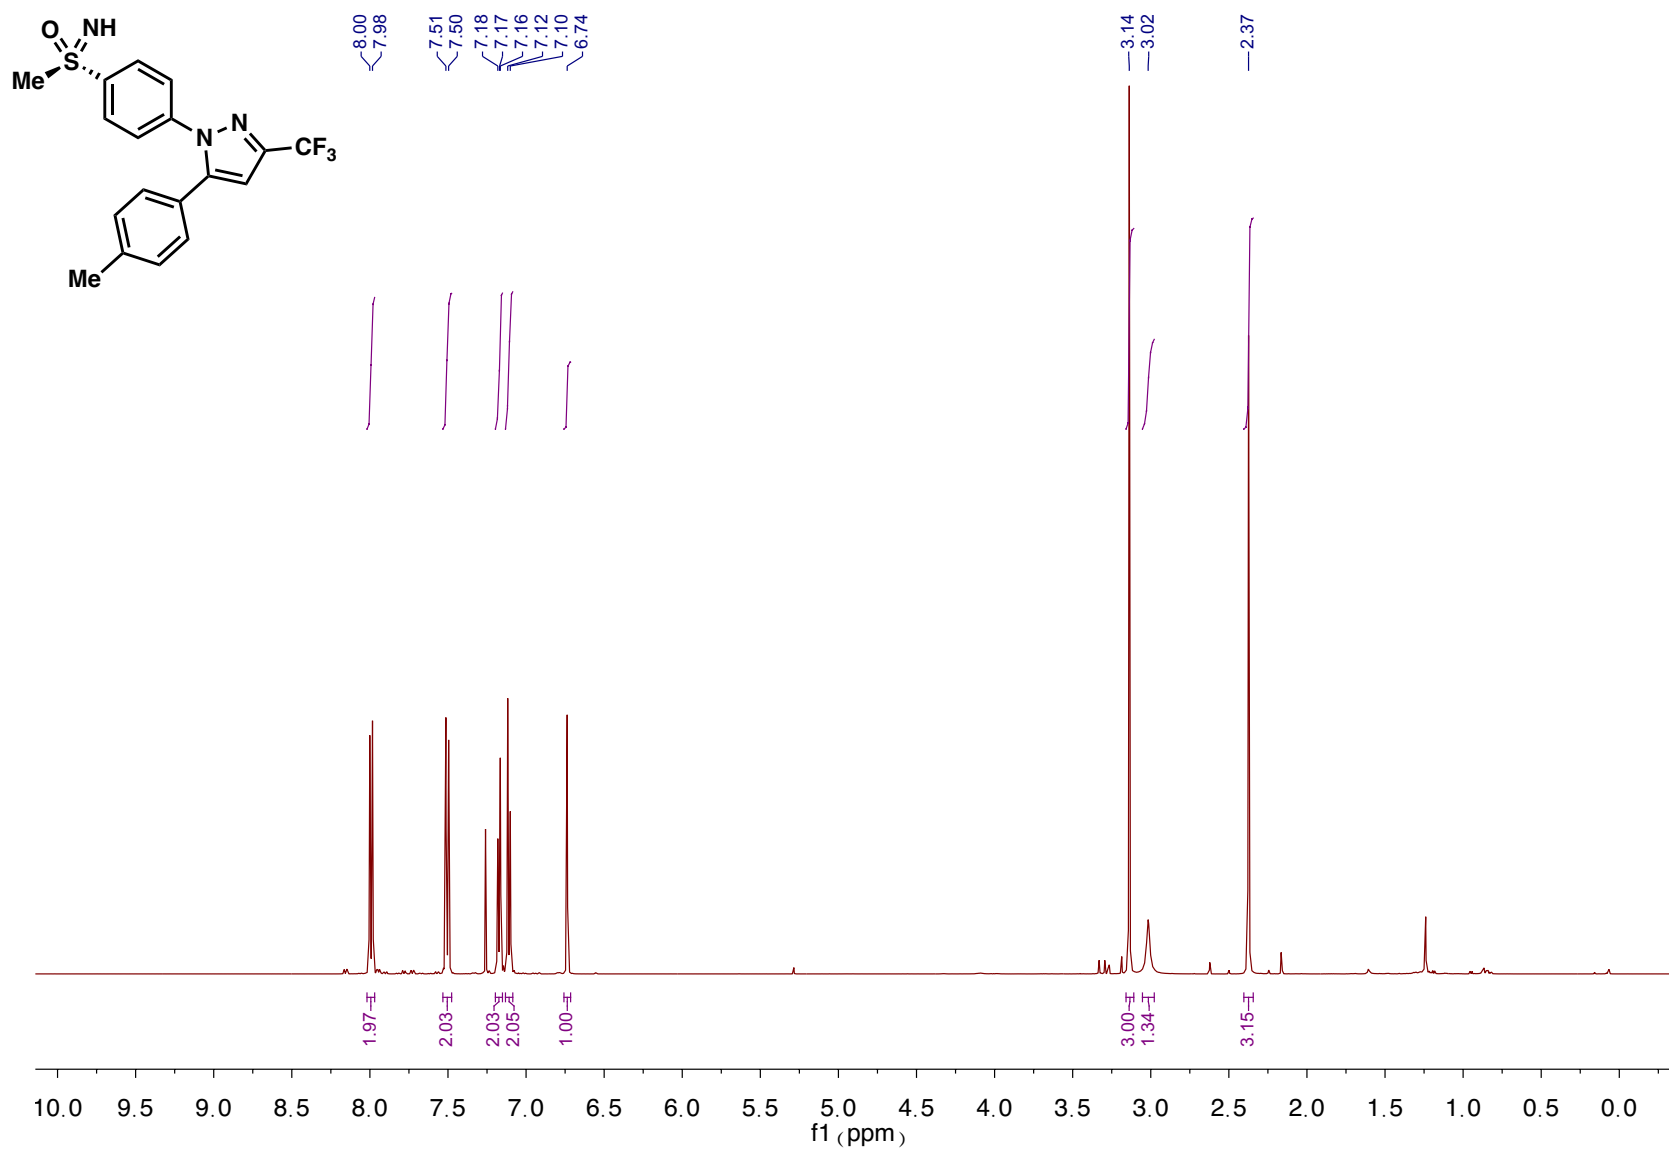

**$^{13}\text{C}$  NMR of compound 20:**

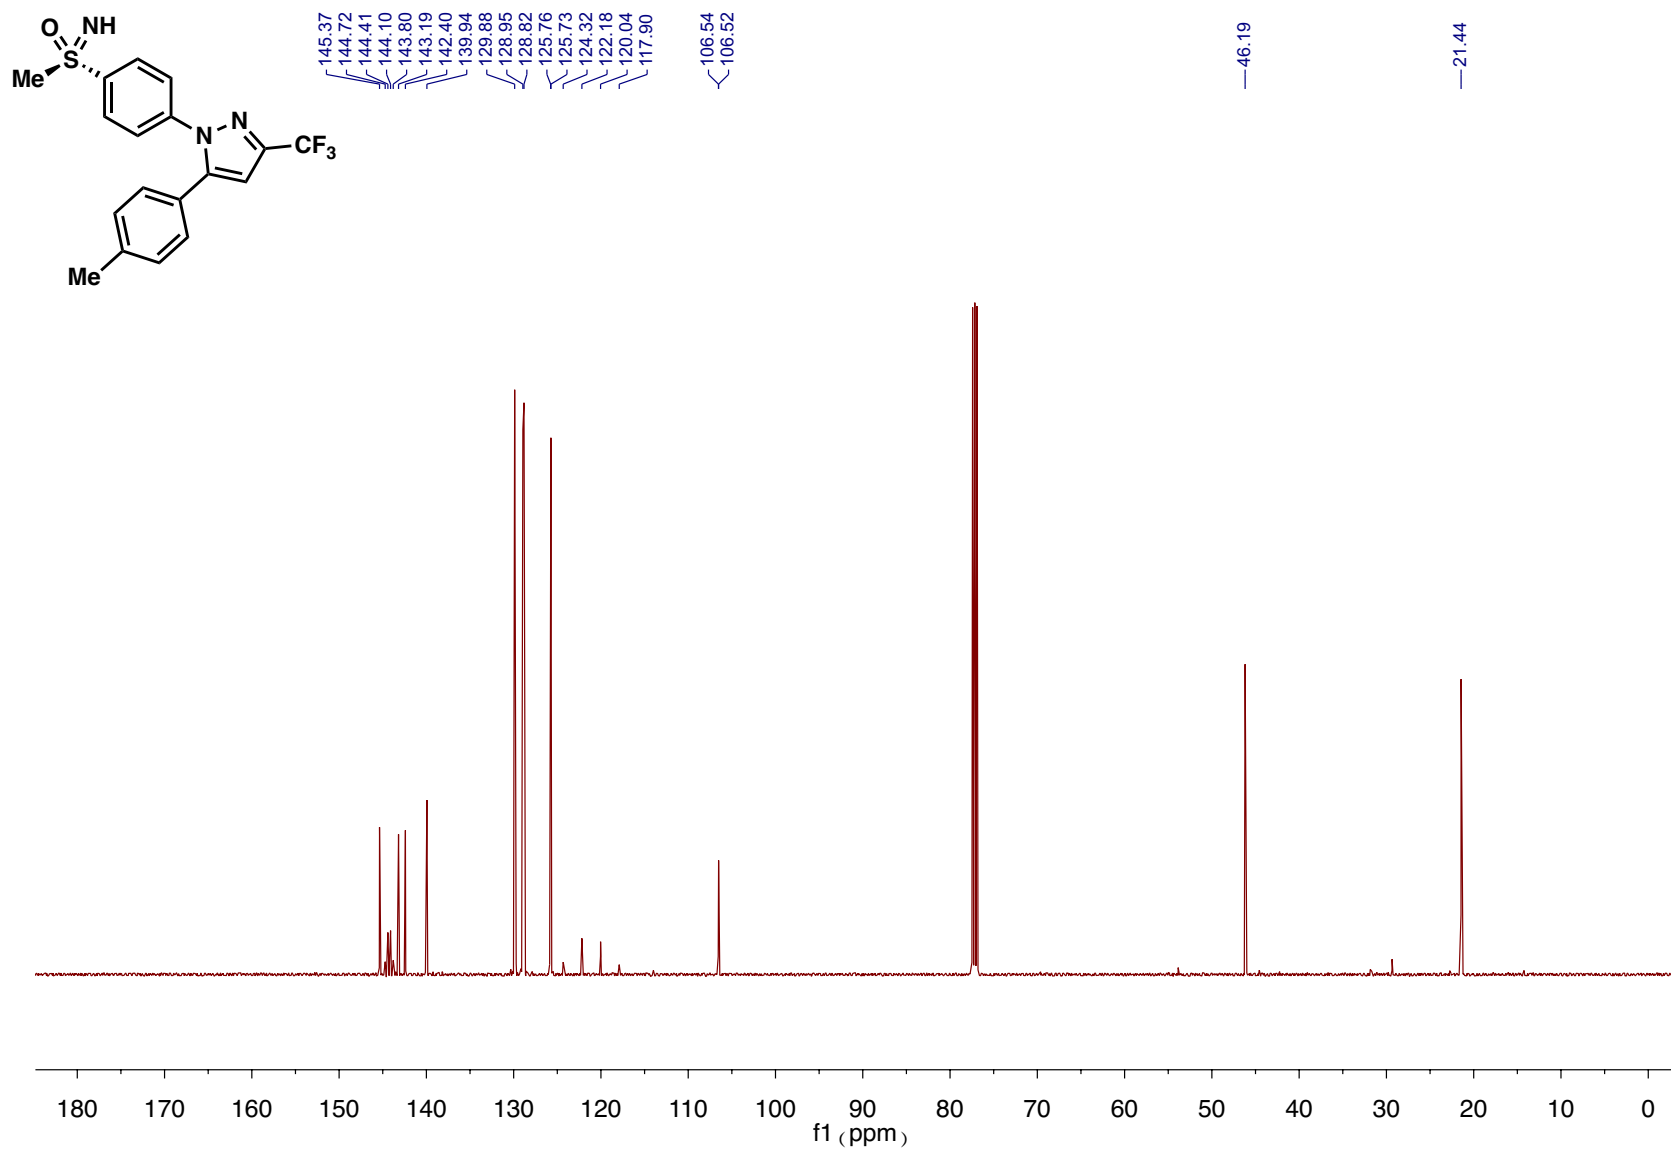

**$^{19}\text{F}$  NMR of compound 20:**

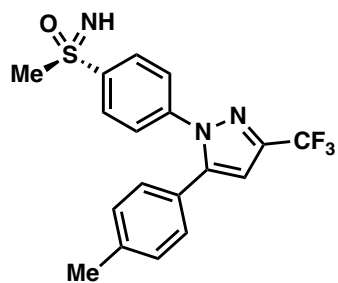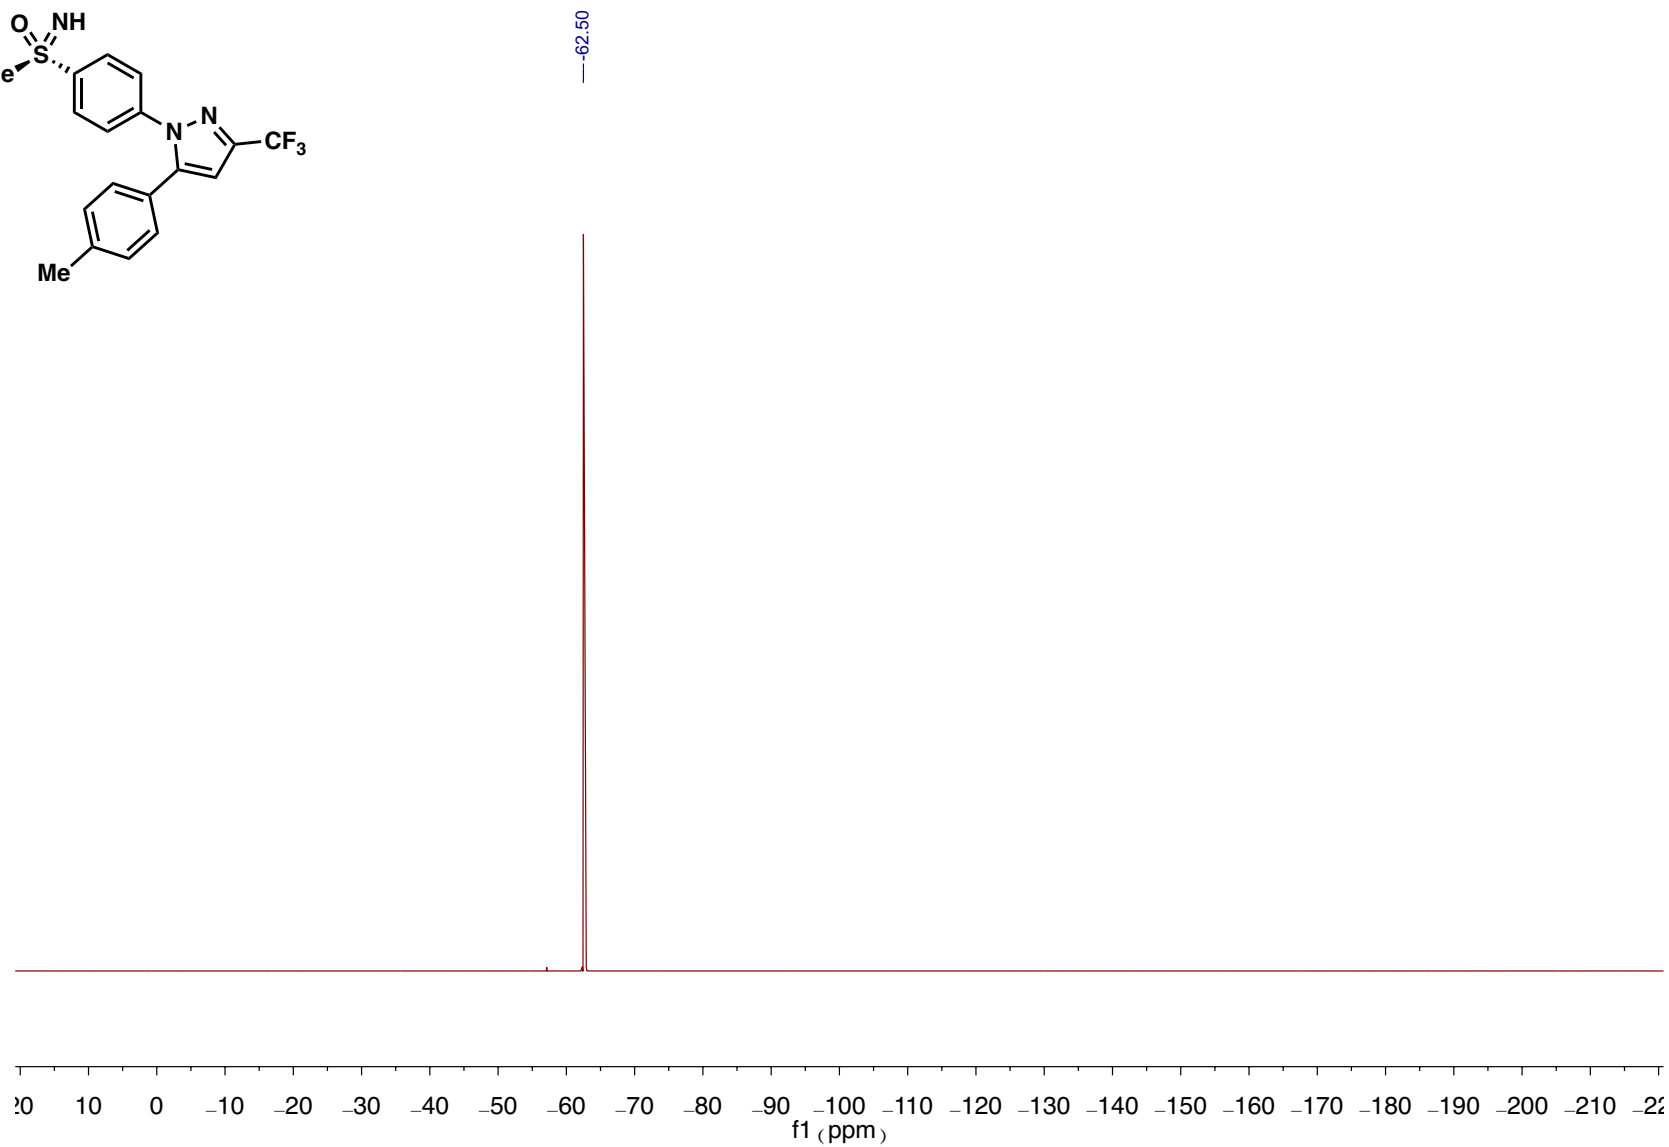

**<sup>1</sup>H NMR of compound 18:**

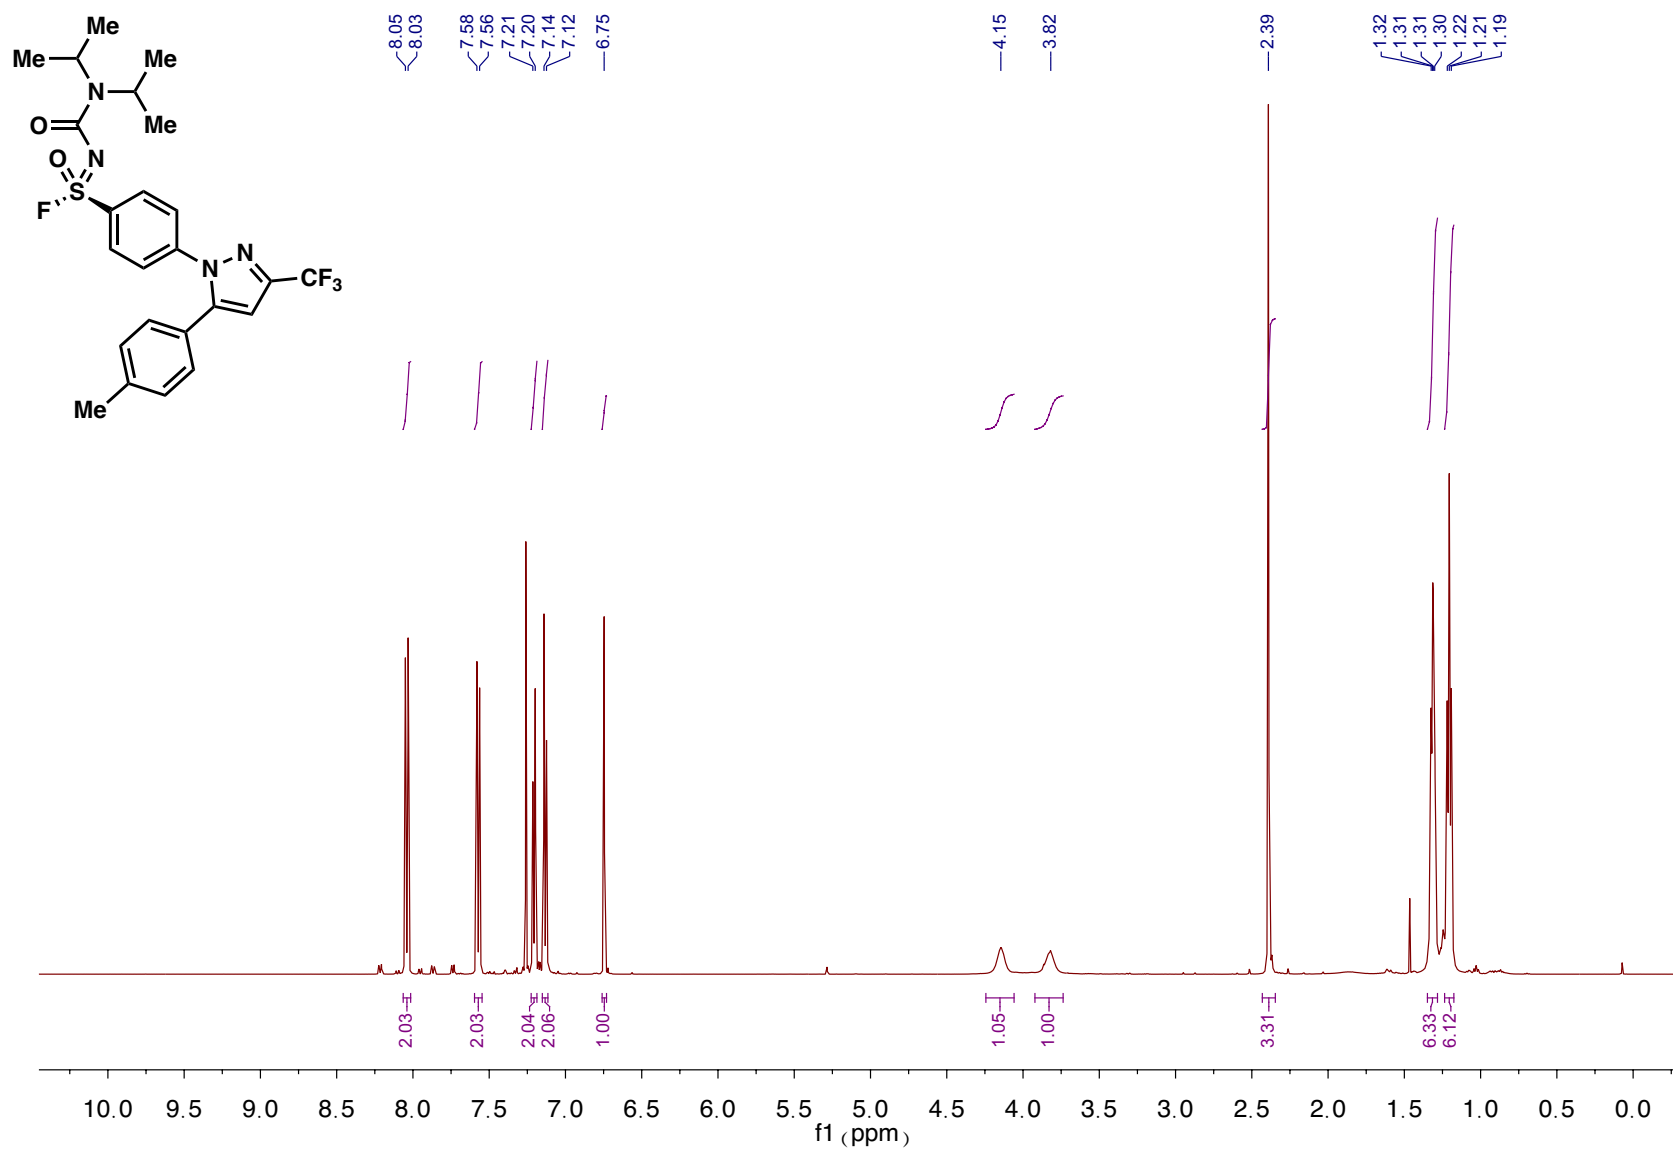

**$^{13}\text{C}$  NMR of compound 18:**

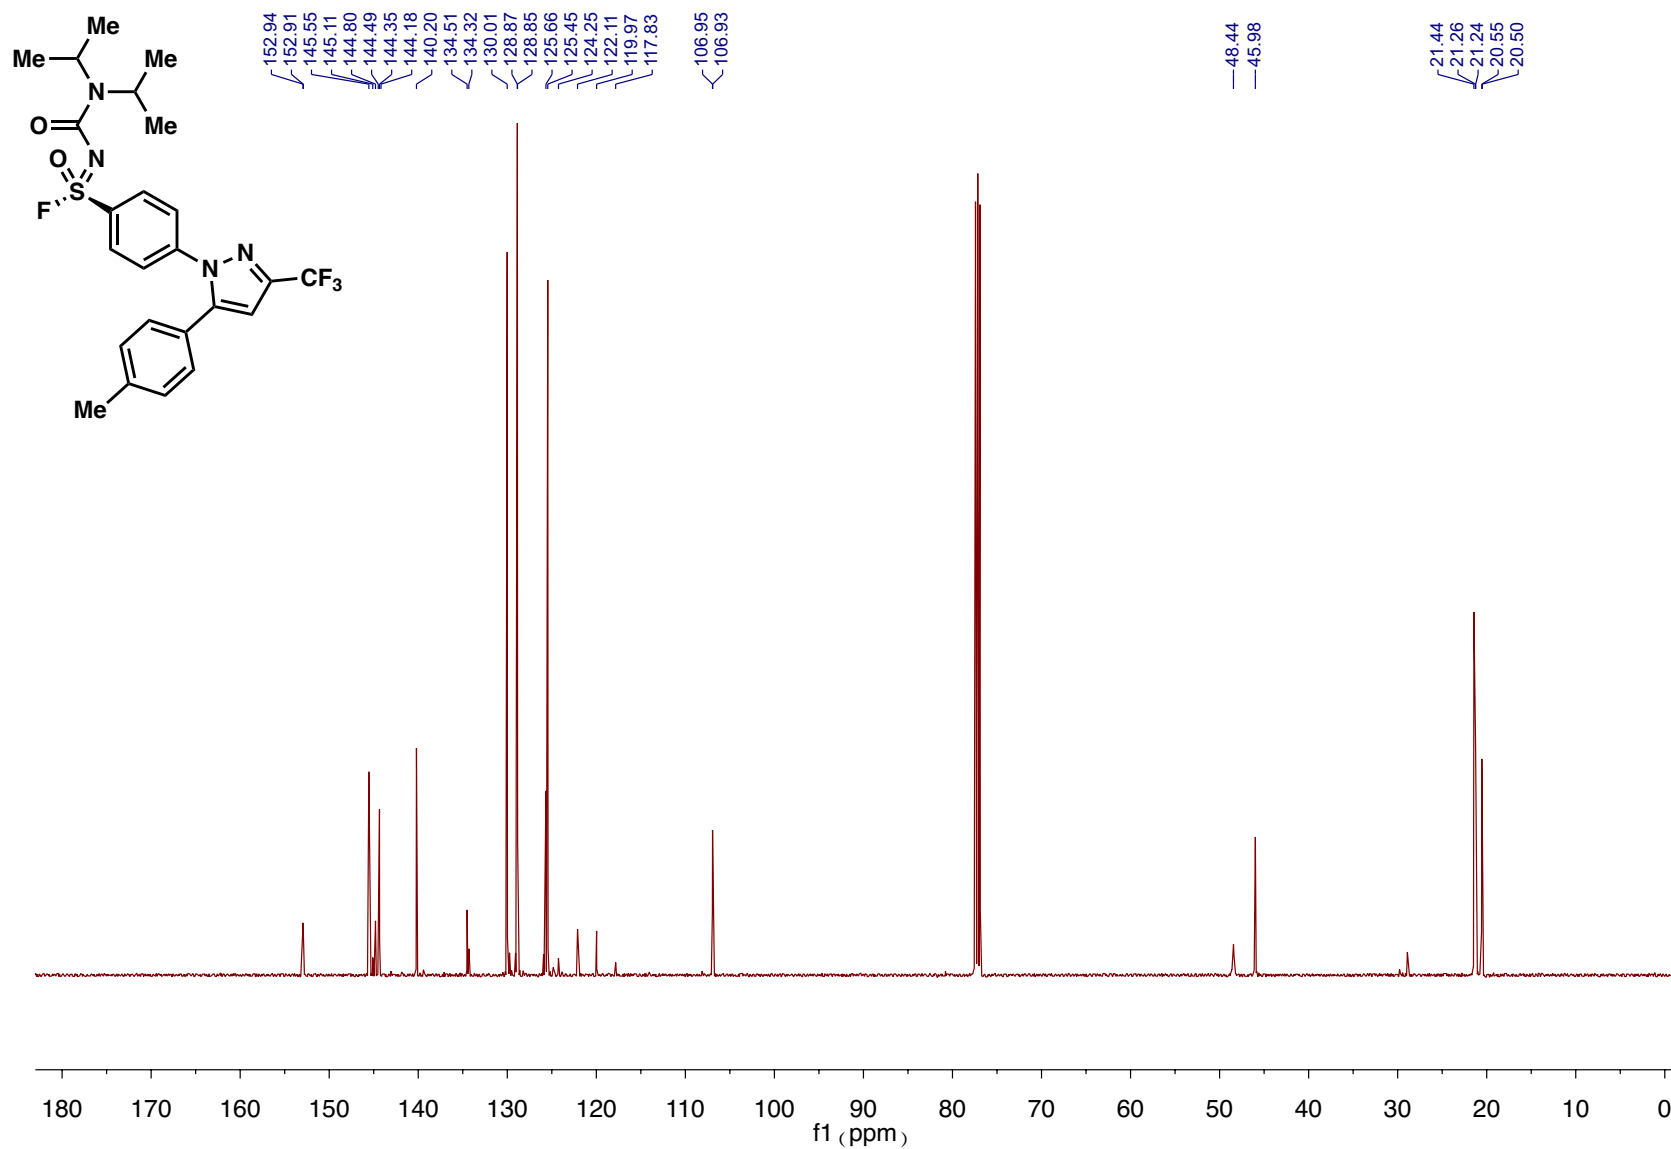

**$^{19}\text{F}$  NMR of compound 18:**

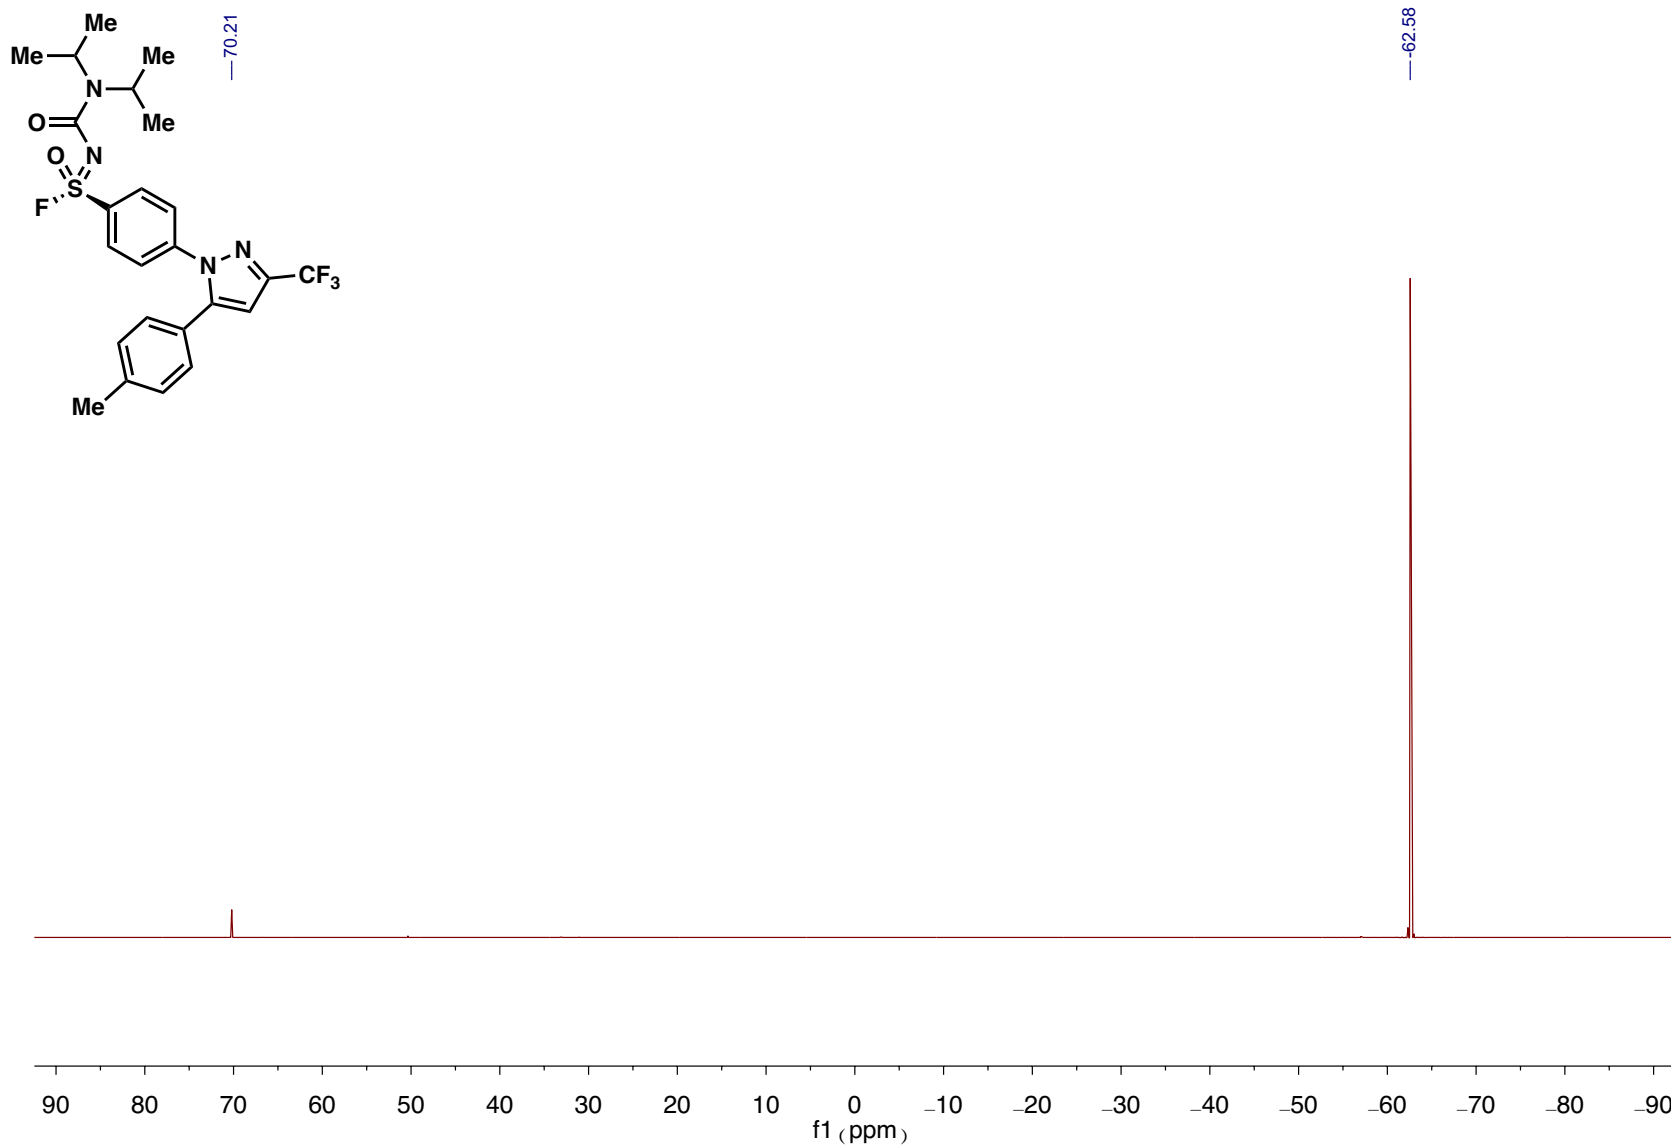

**<sup>1</sup>H NMR of compound 21:**

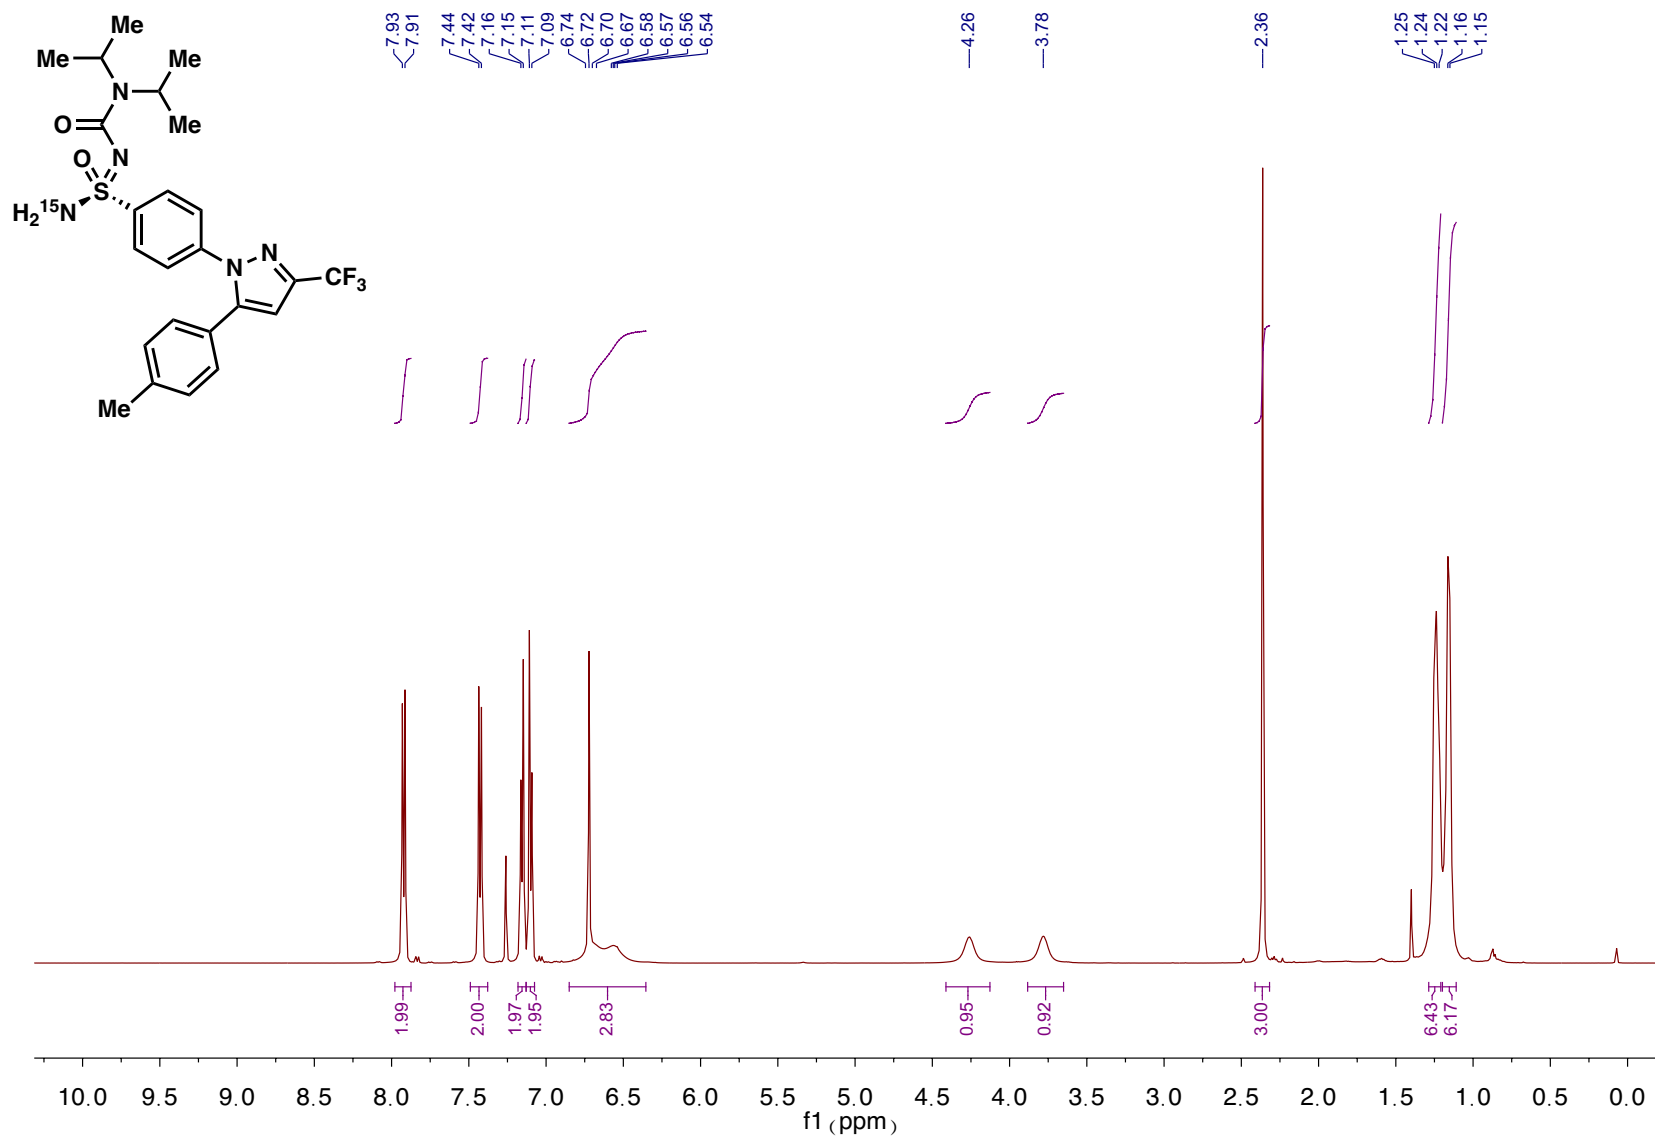

**$^{13}\text{C}$  NMR of compound 21:**

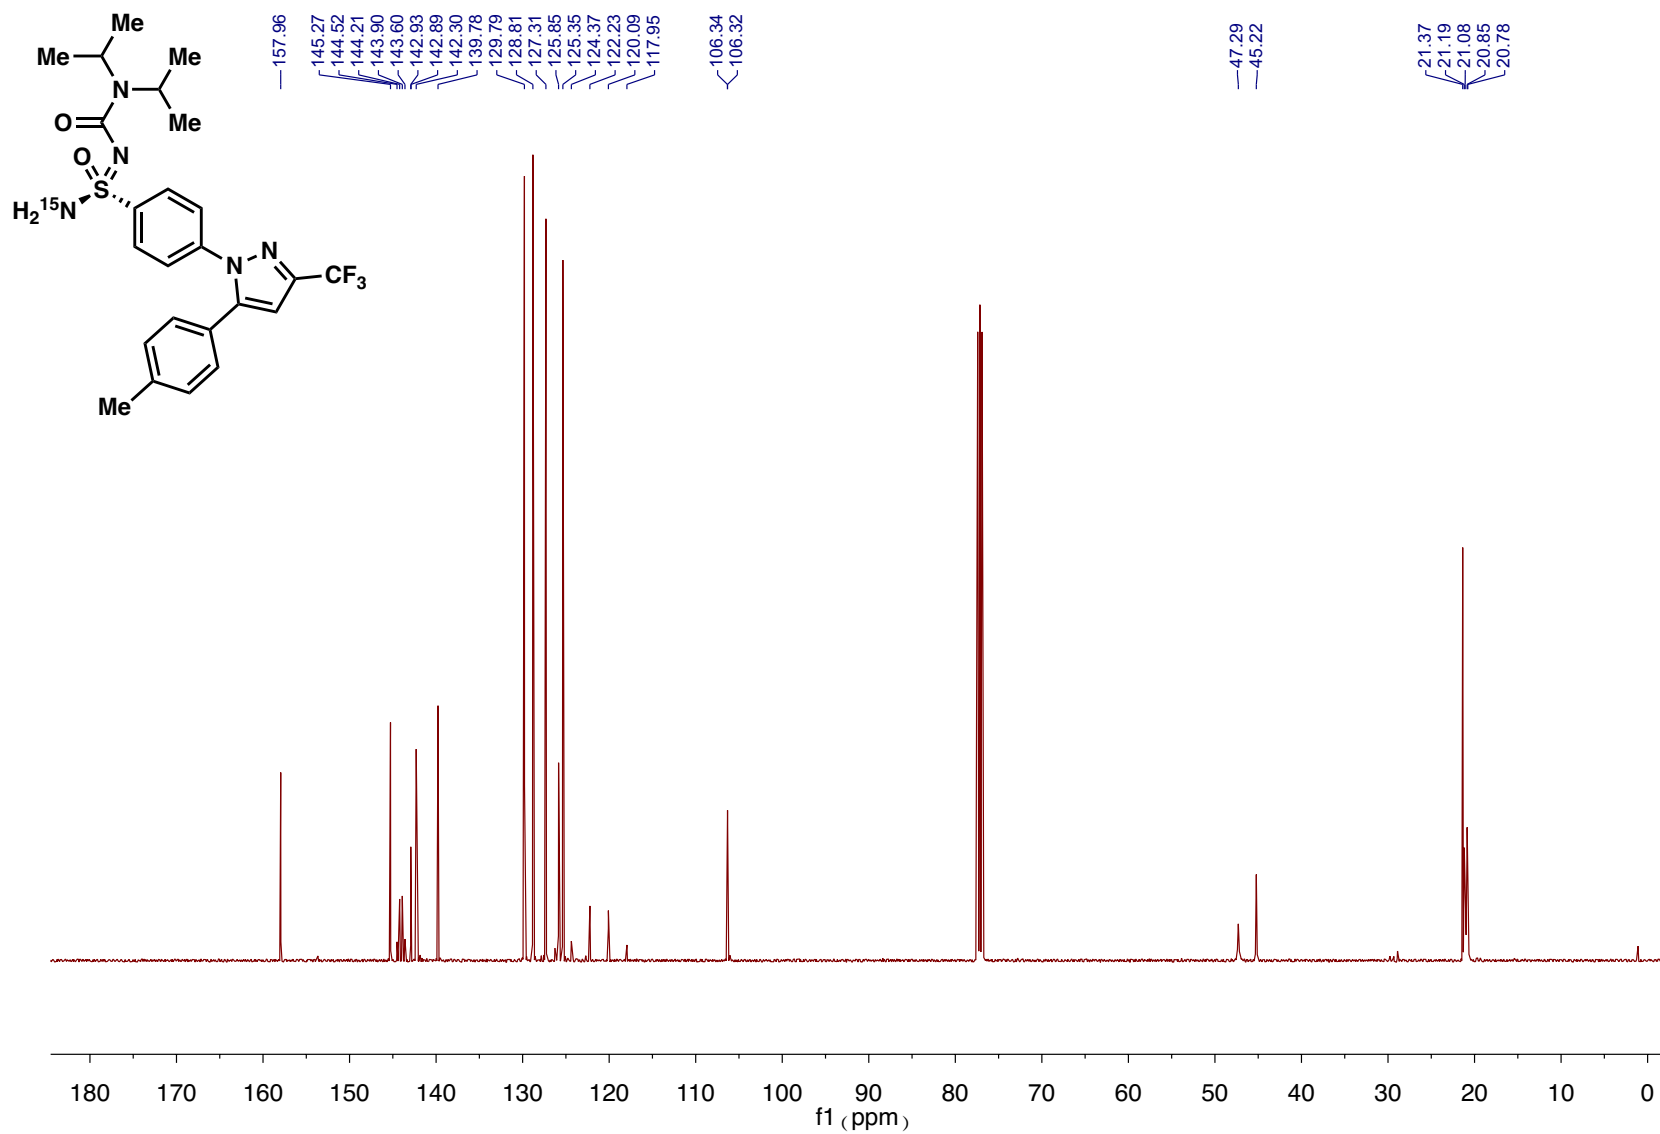

**$^{19}\text{F}$  NMR of compound 21:**

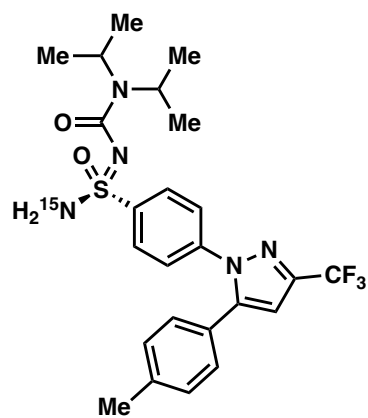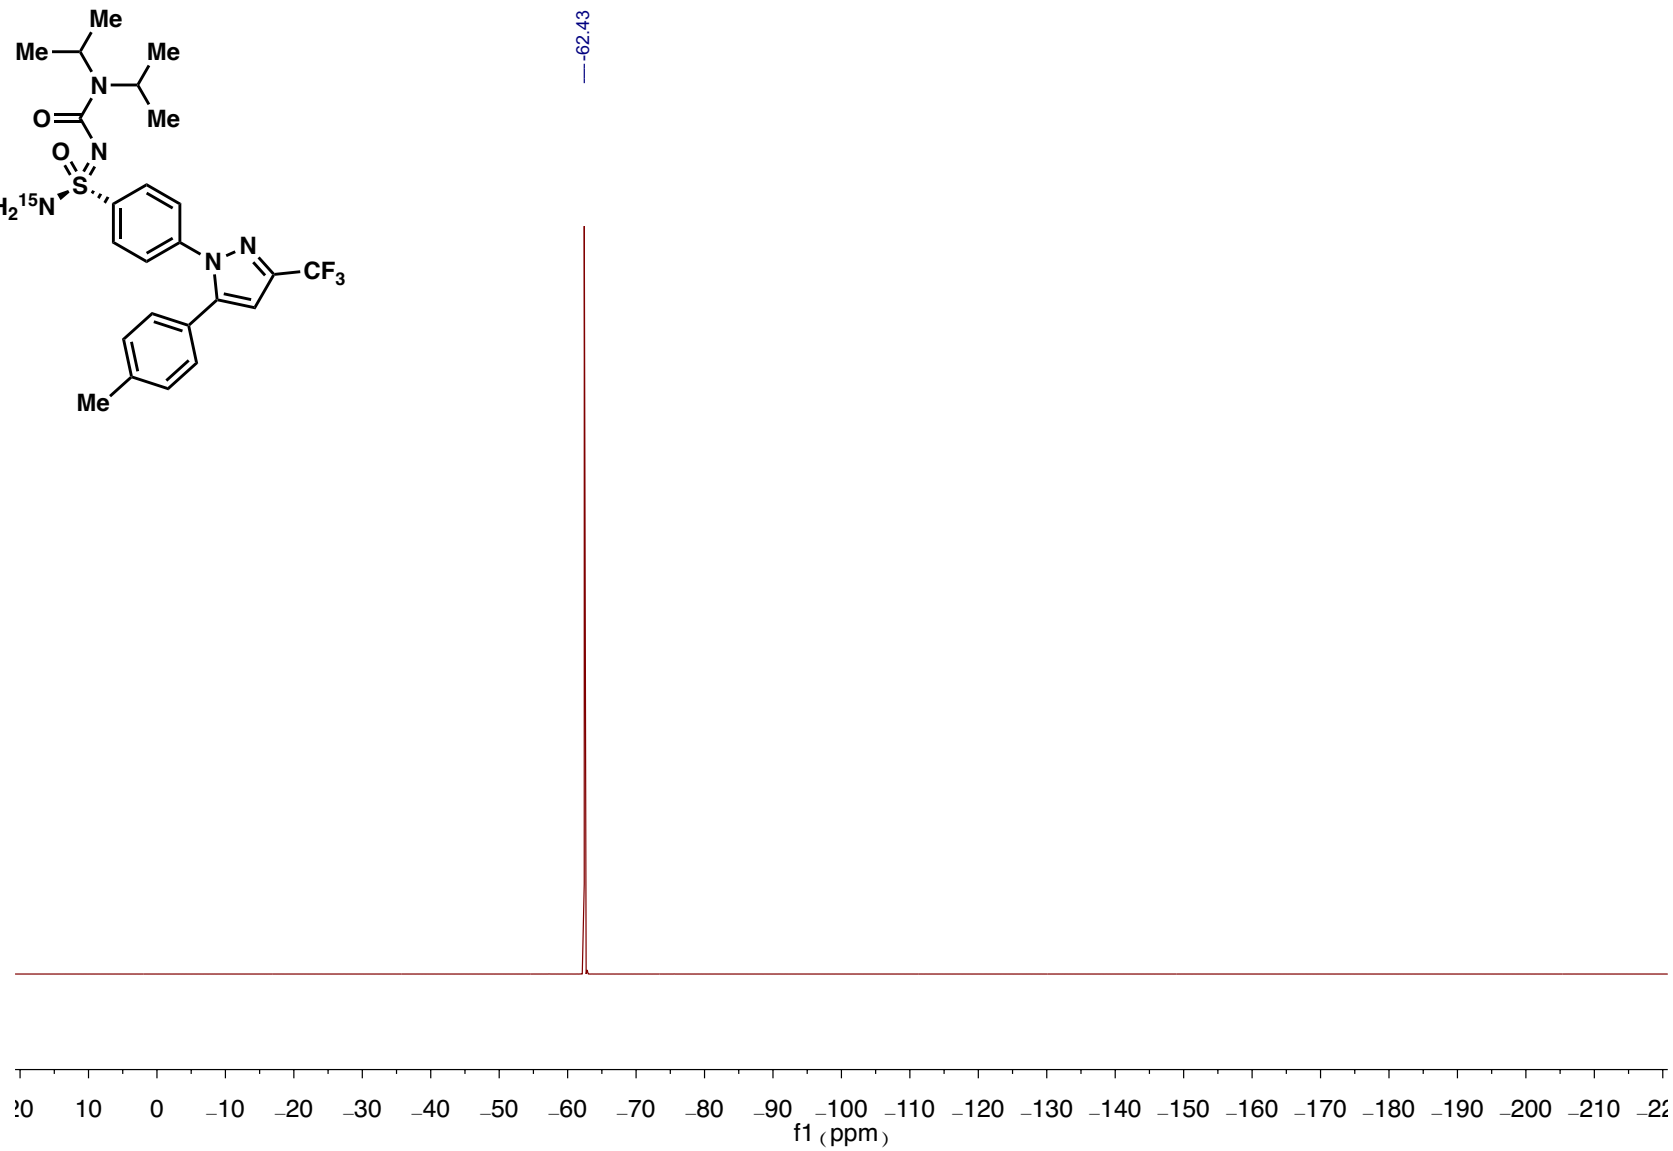

**<sup>1</sup>H NMR of compound 22:**

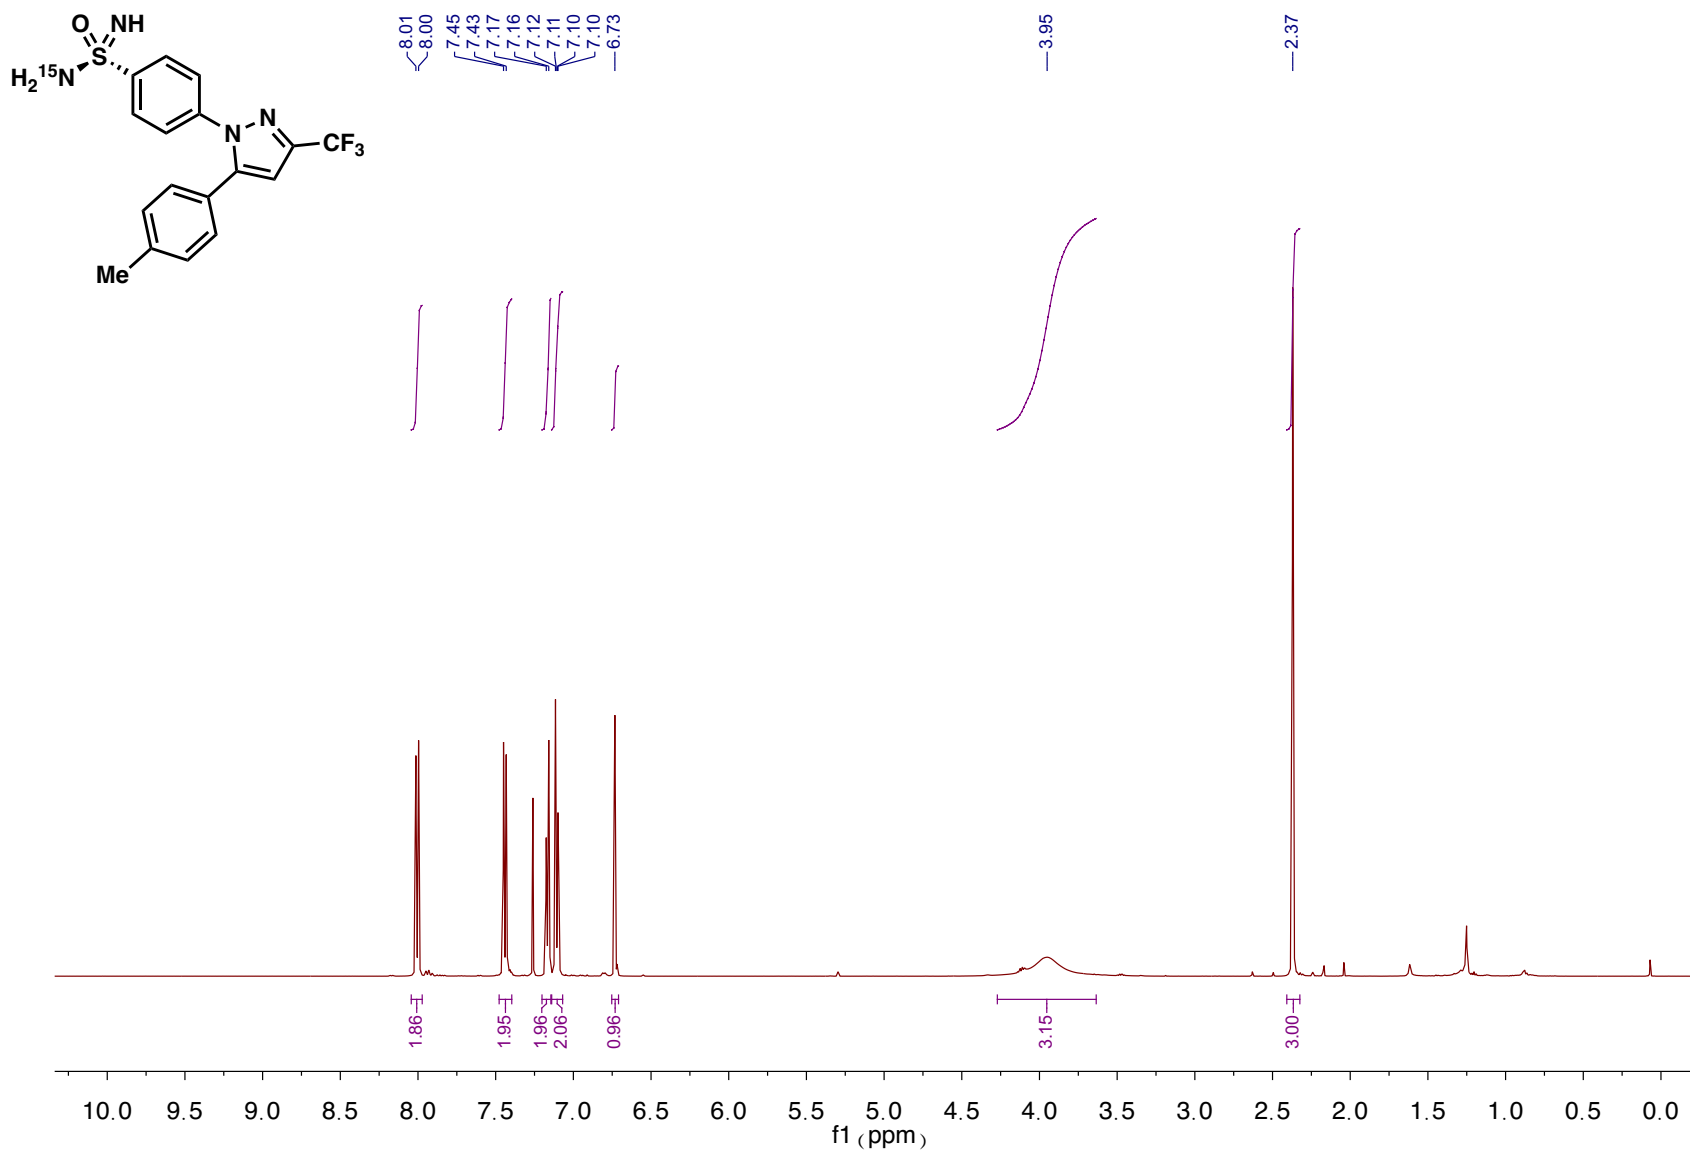

**$^{13}\text{C}$  NMR of compound 22:**

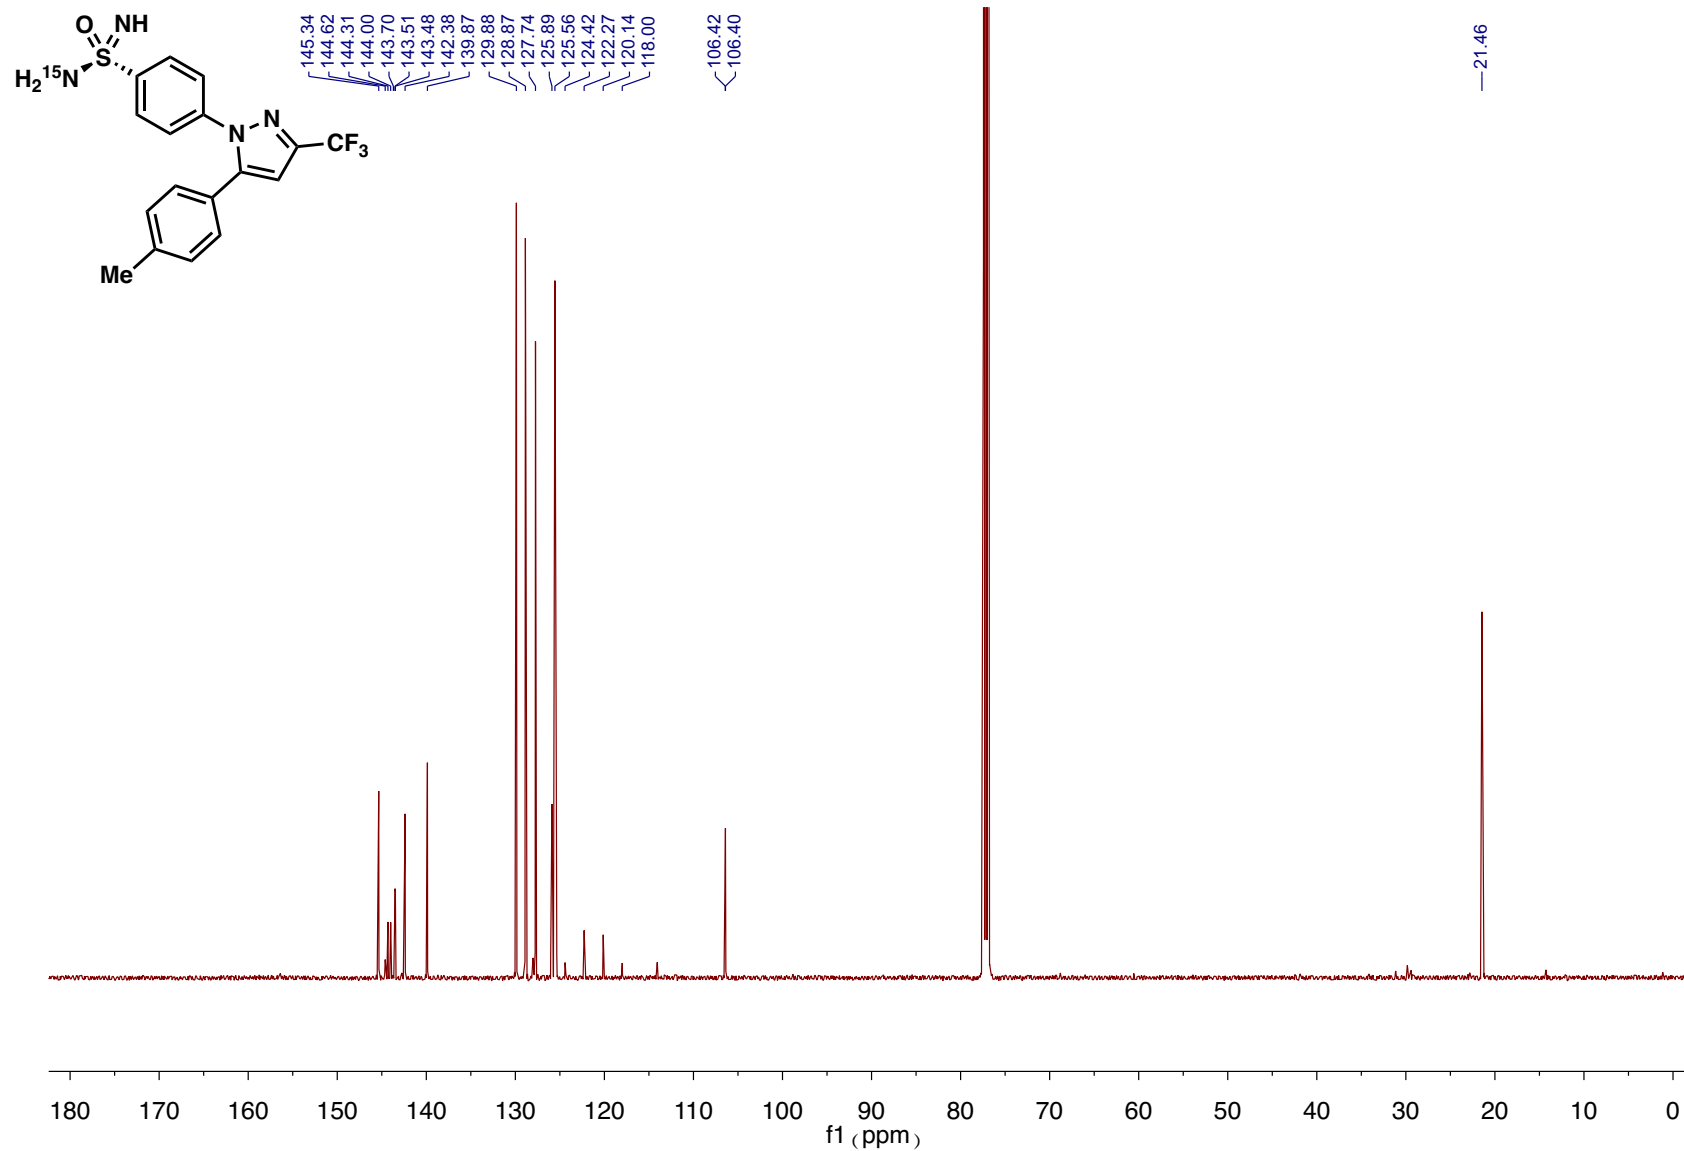

**$^{19}\text{F}$  NMR of compound 22:**

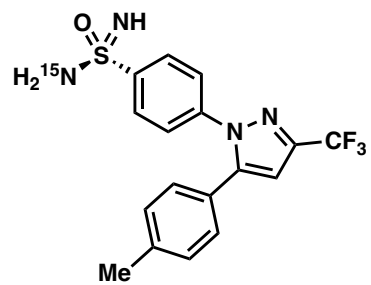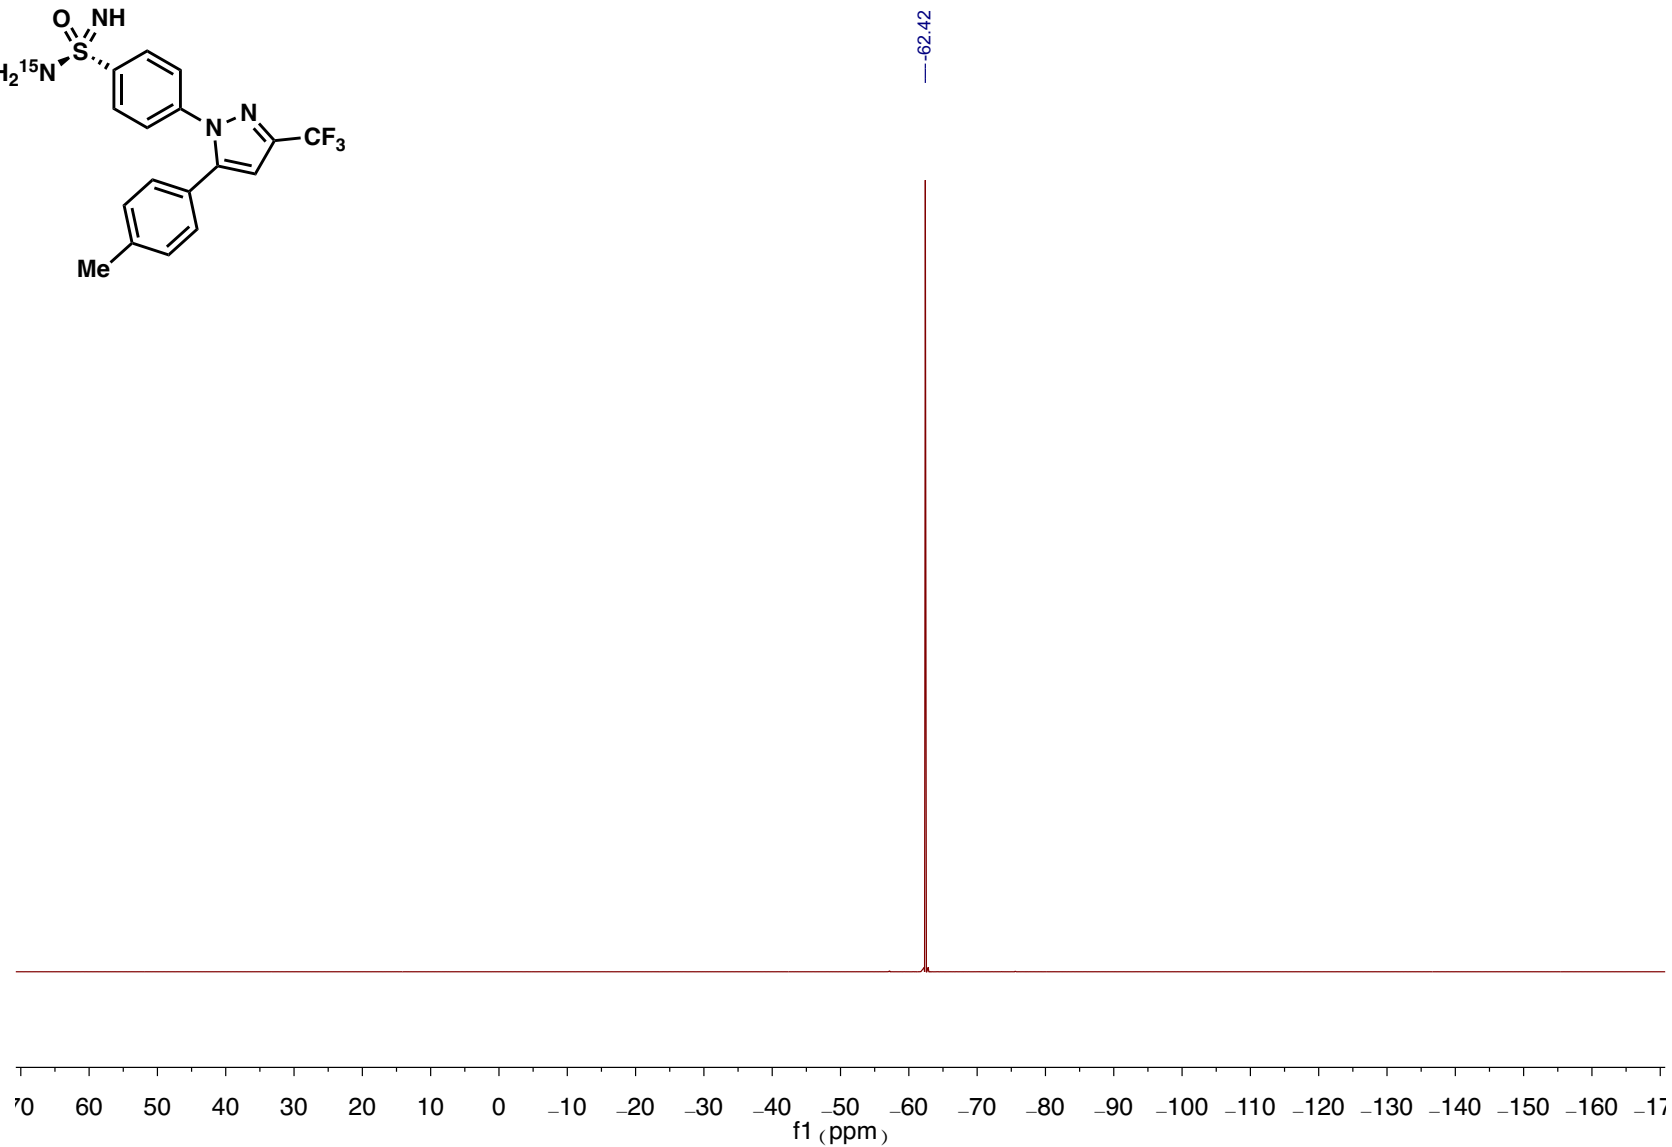

**<sup>1</sup>H NMR of compound 24:**

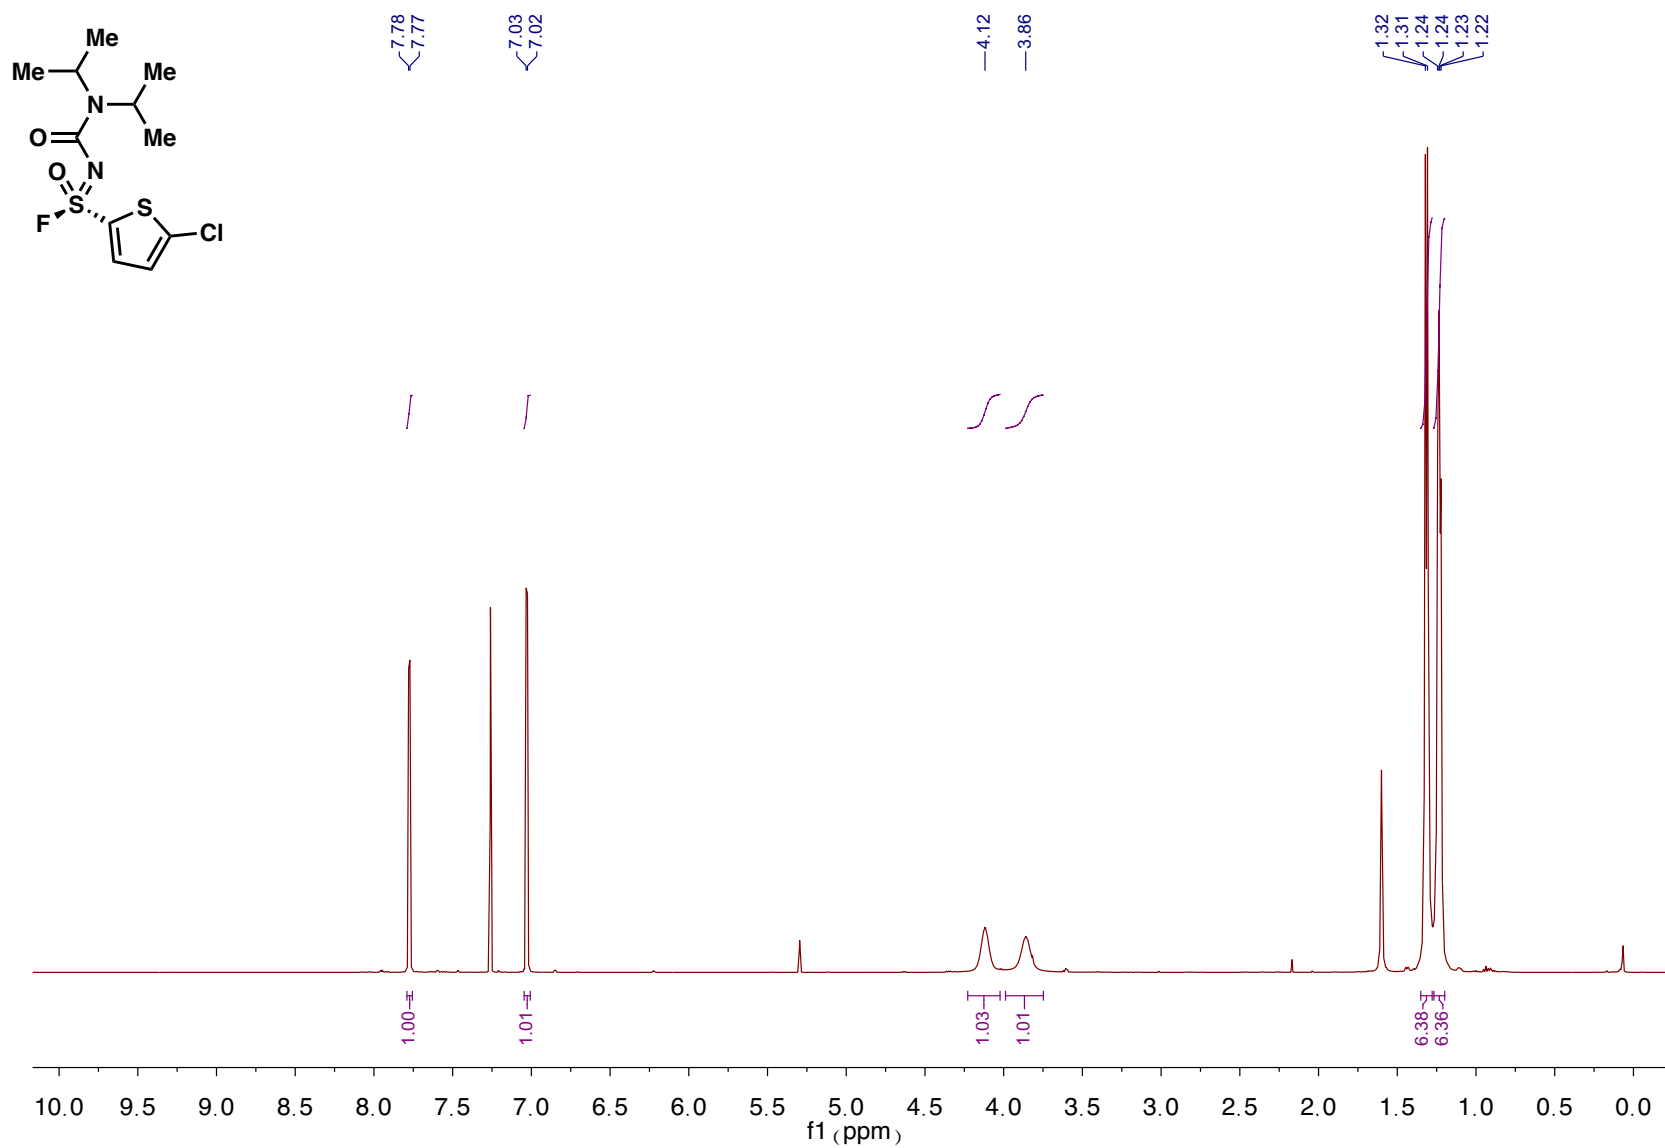

**$^{13}\text{C}$  NMR of compound 24:**

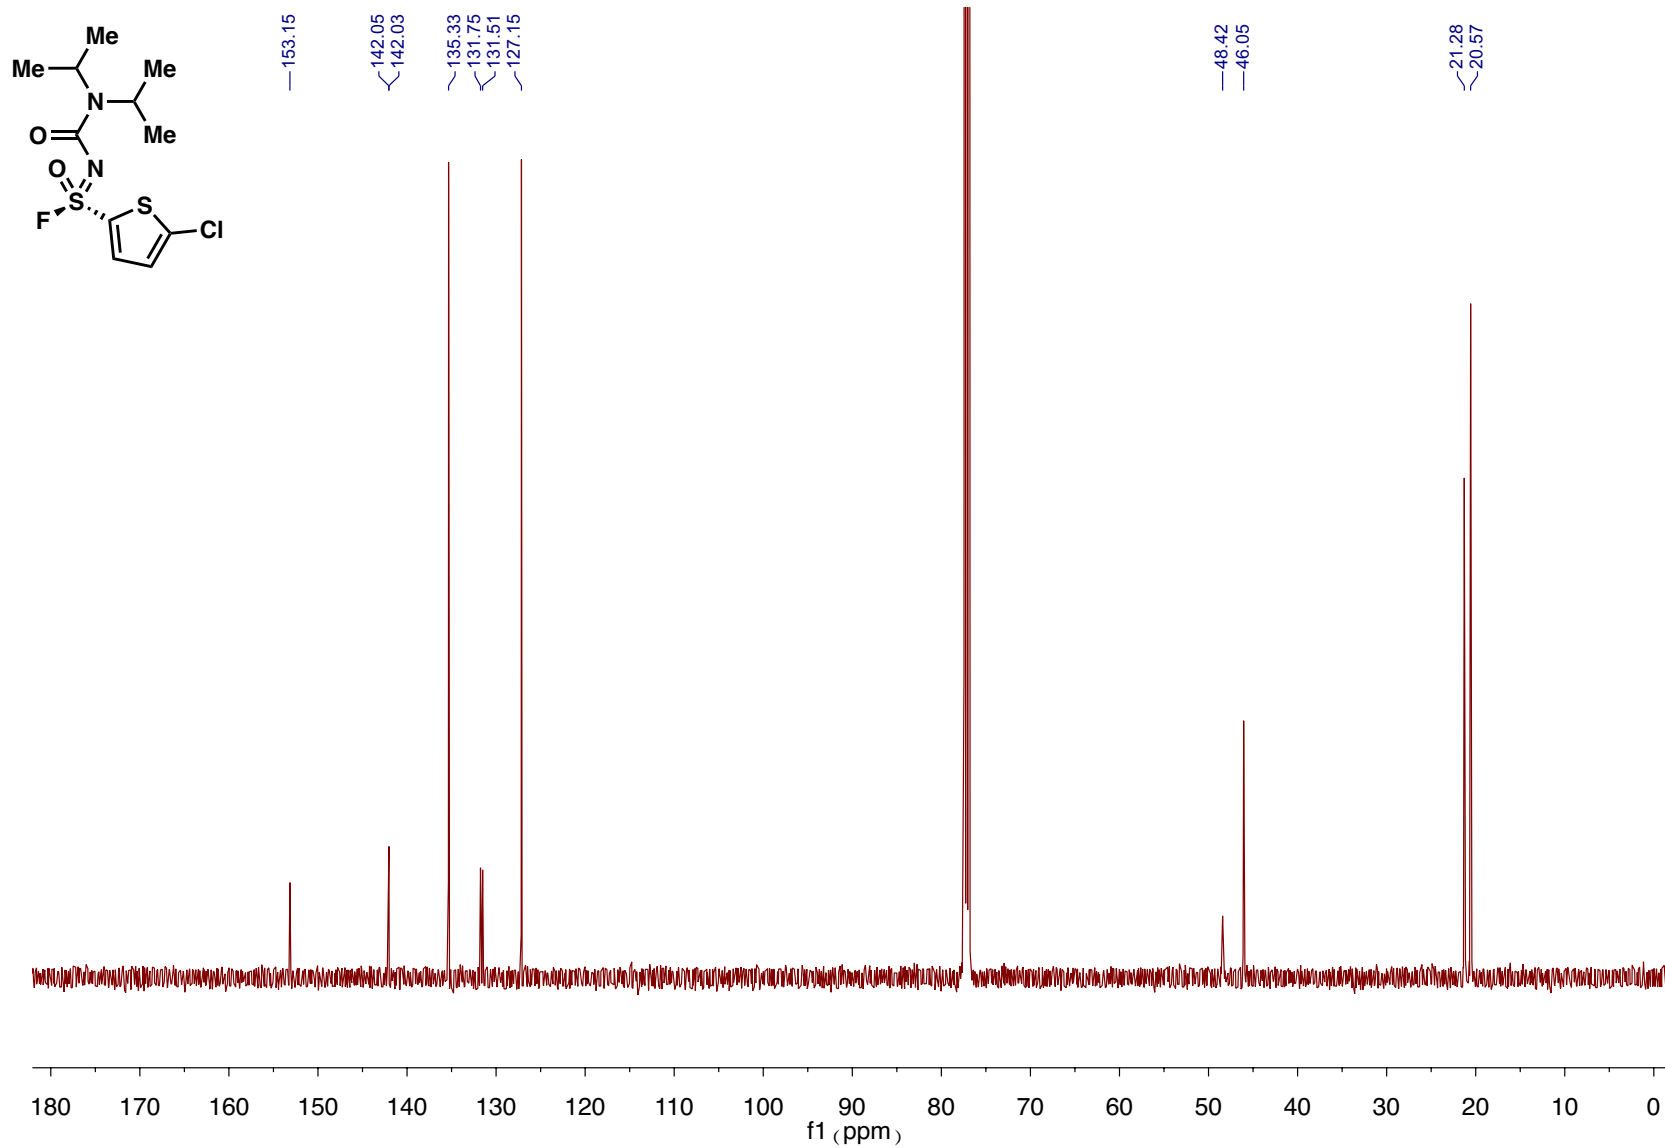

**$^{19}\text{F}$  NMR of compound 24:**

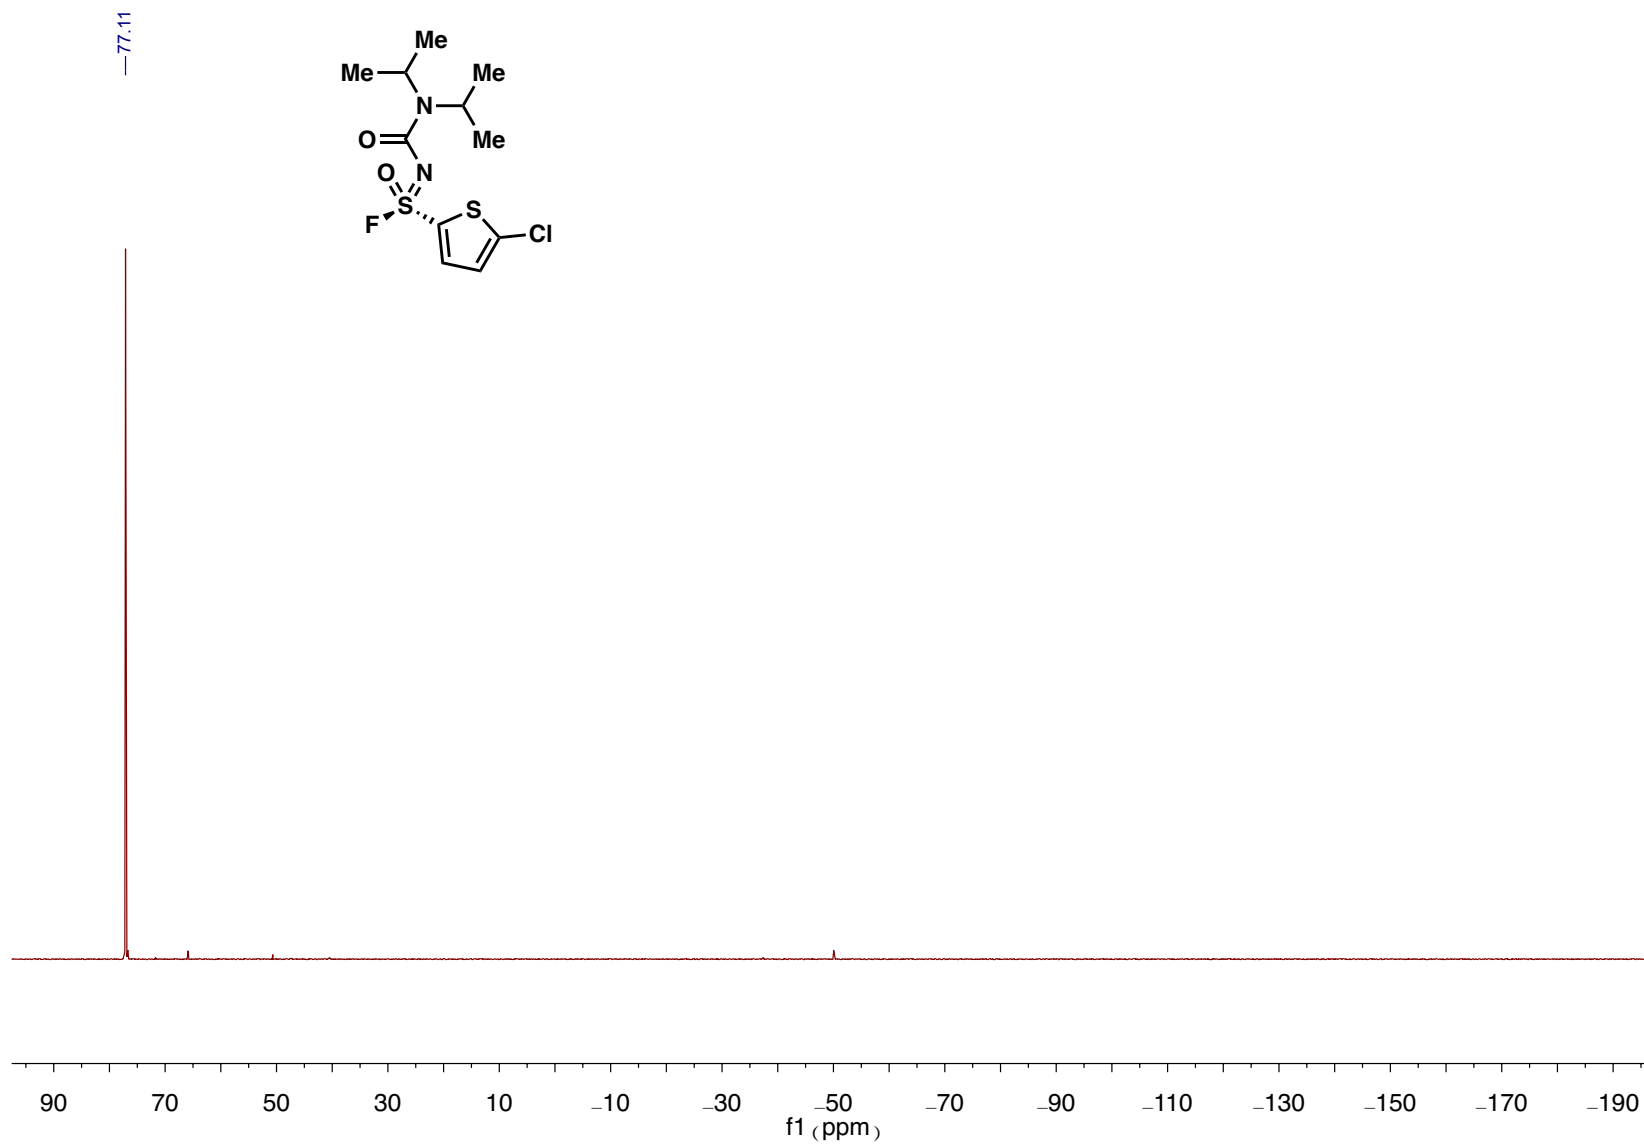

# <sup>1</sup>H NMR of compound 26:

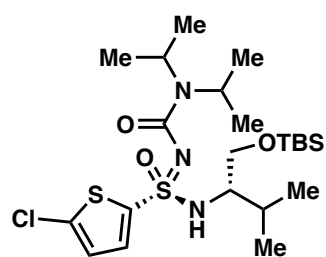

**Green:** mixture of diastereomers  
**Red:** a single diastereomer

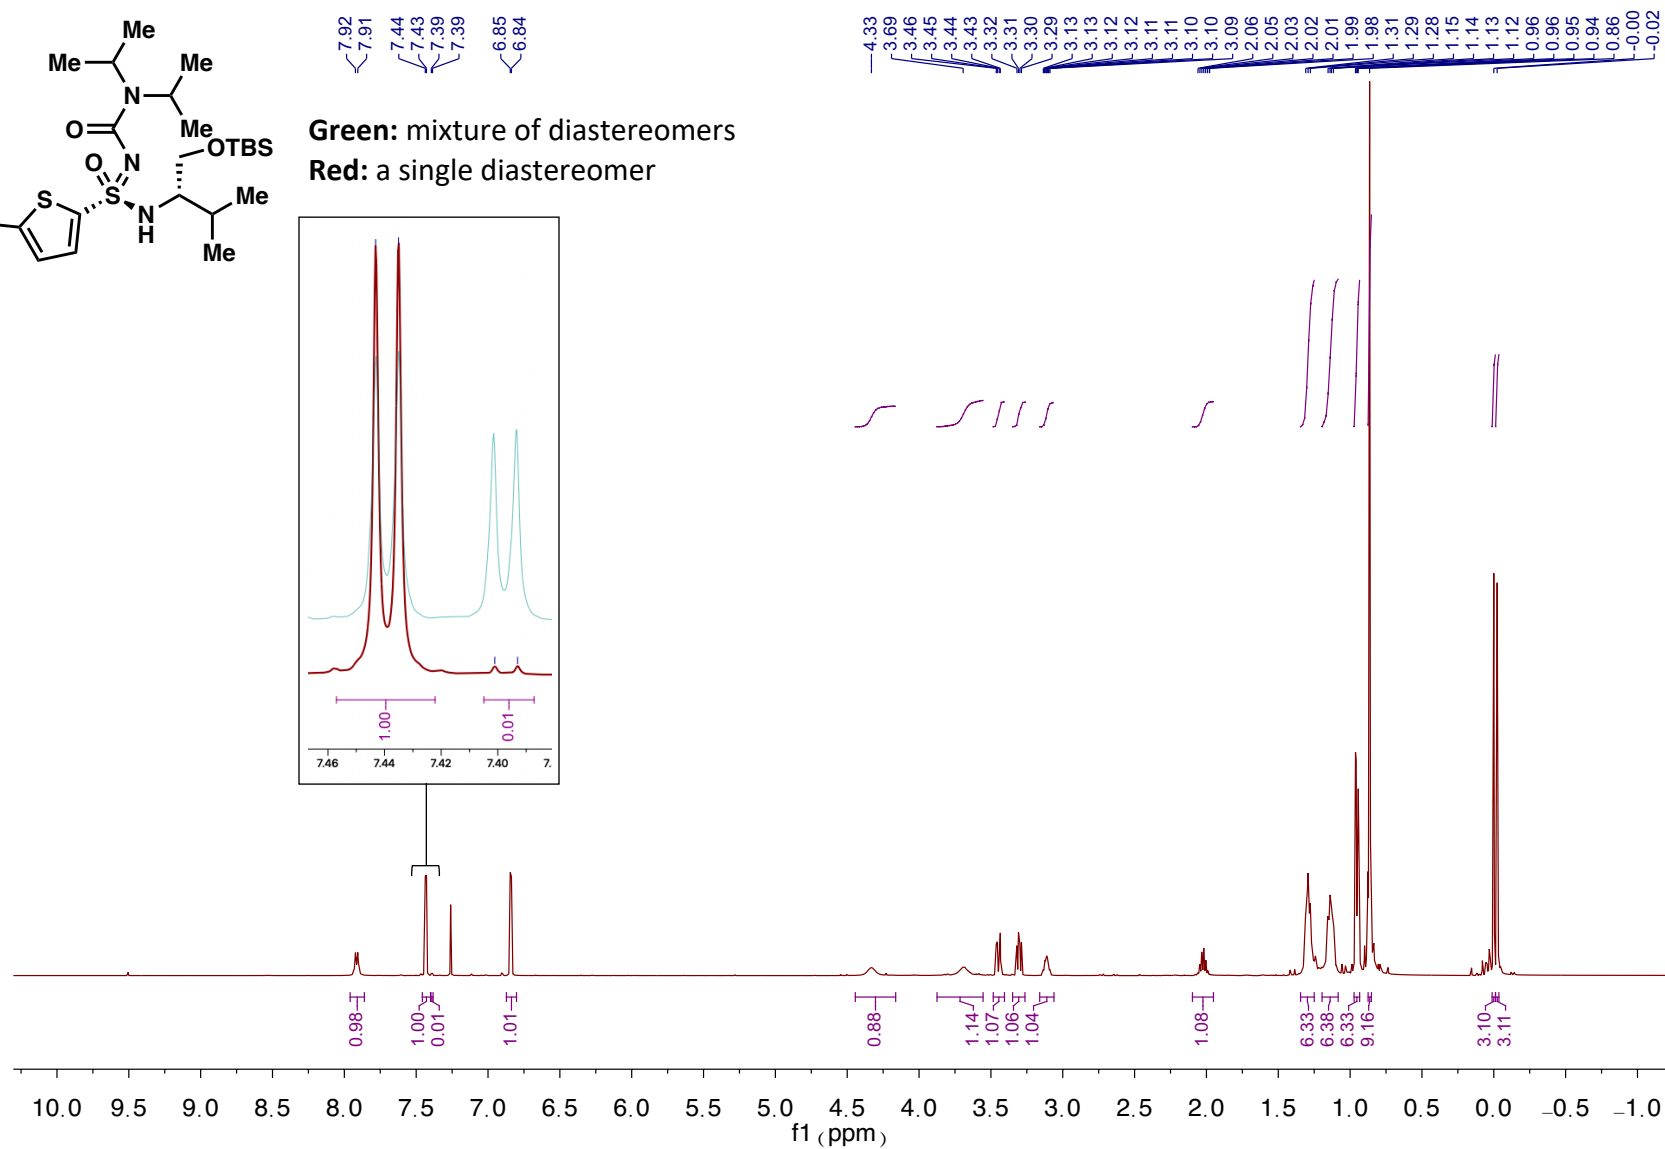

**<sup>13</sup>C NMR of compound 26:**

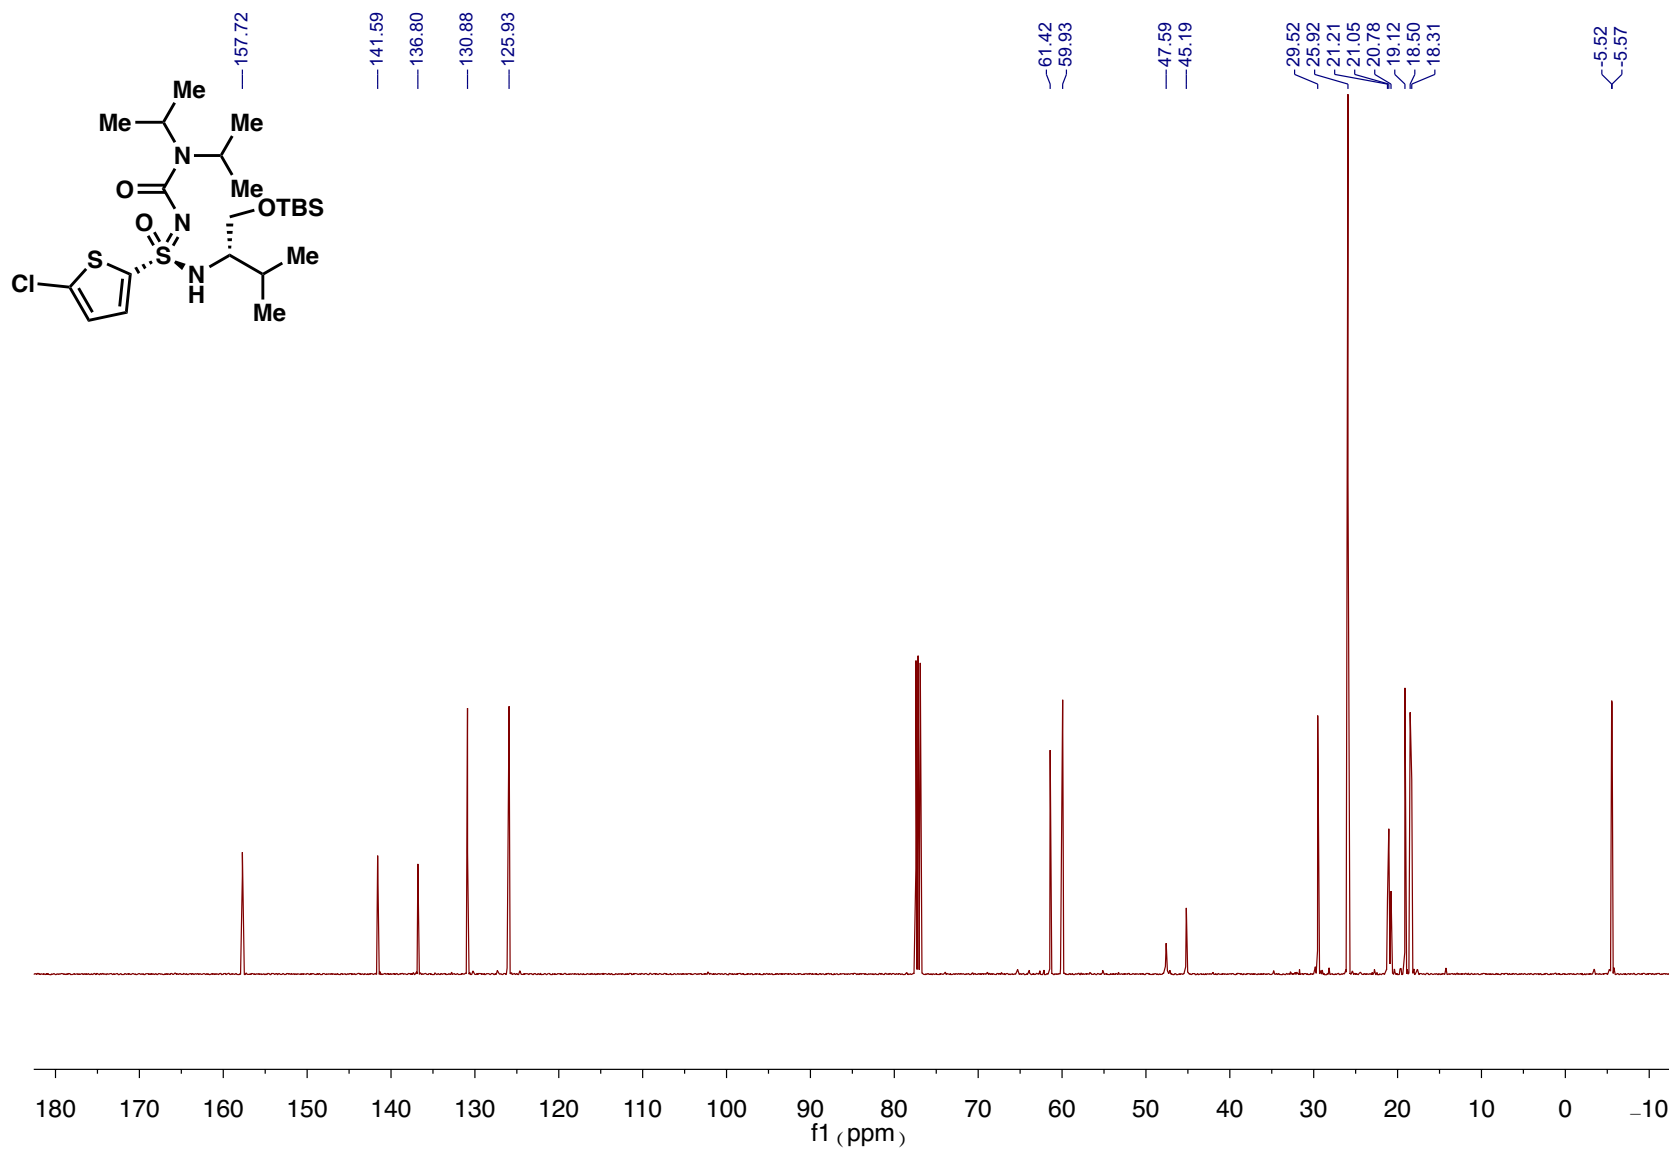

**<sup>1</sup>H NMR of compound 27:**

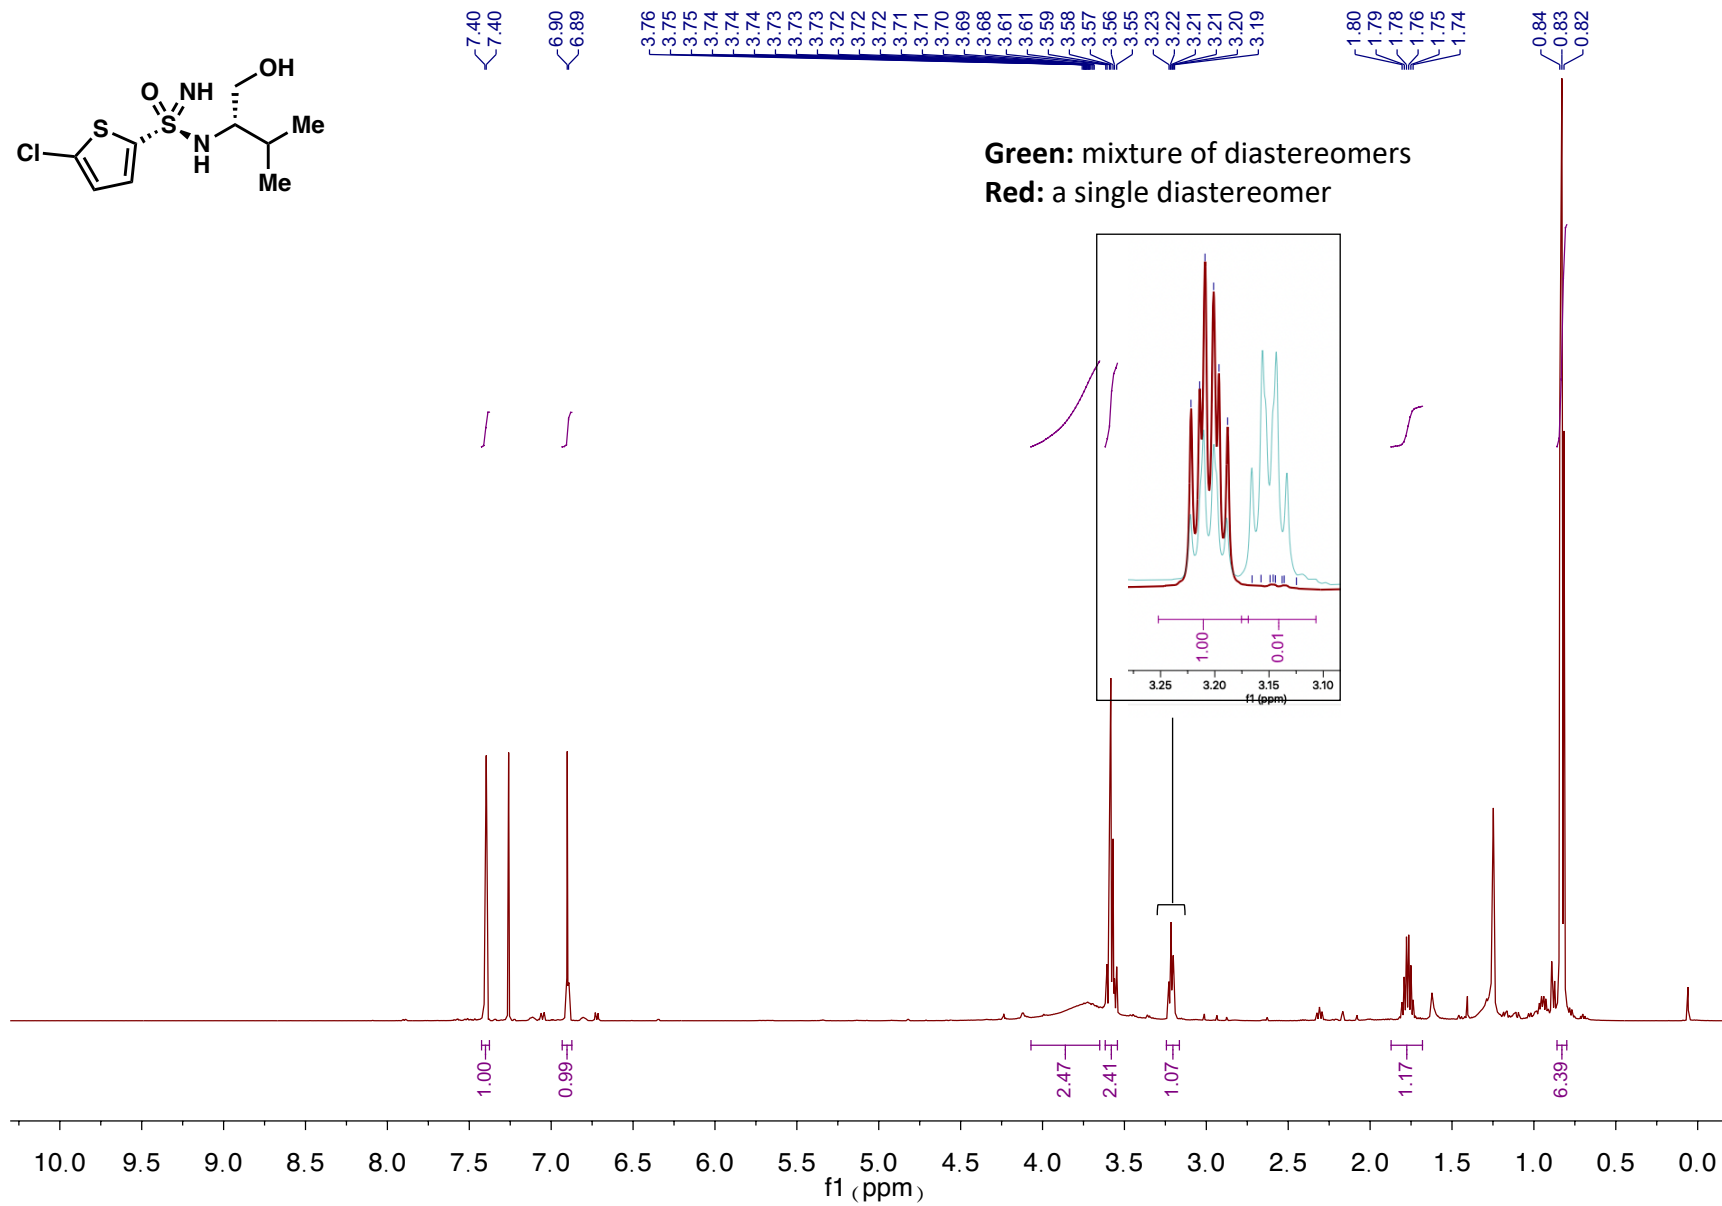

**$^{13}\text{C}$  NMR of compound 27:**

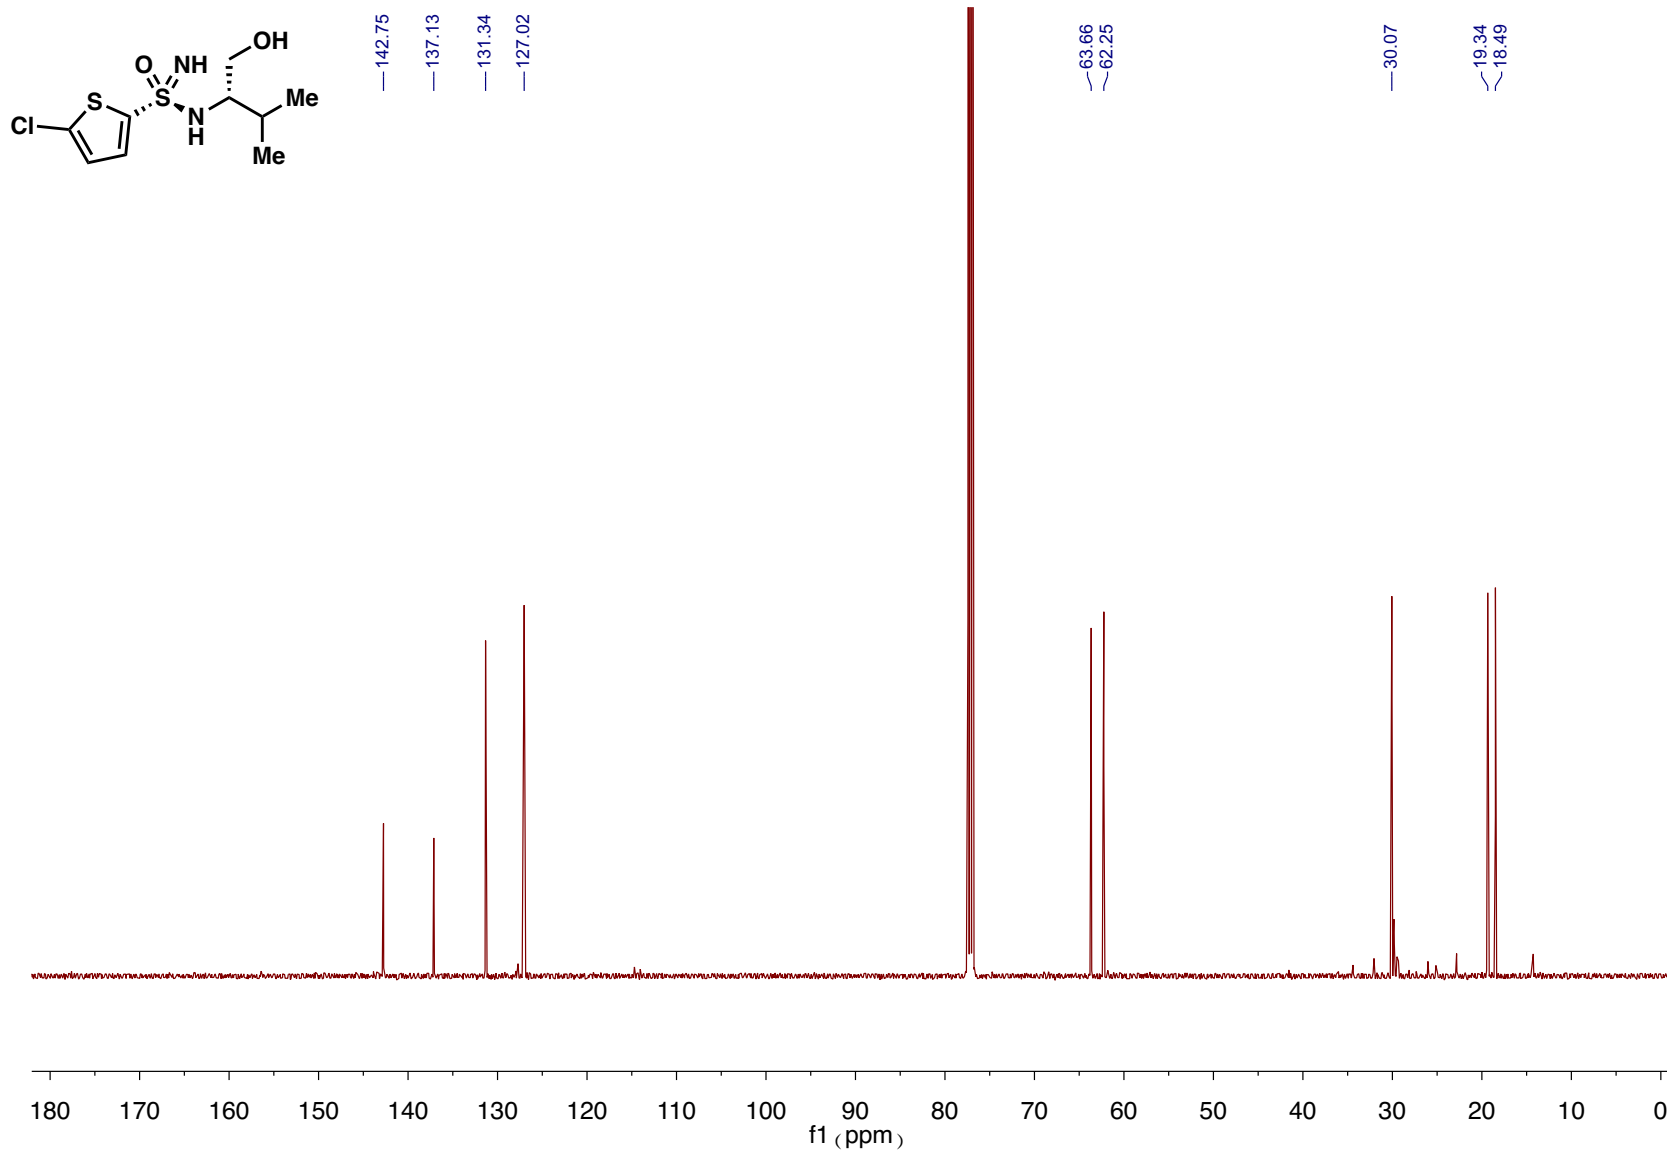

Supplement: NIHMS1974063-supplement-Supporting_information.pdf [file NIHMS1974063-supplement-Supporting_information.pdf]
